# Supplementary material for: Identification of 12 cancer types through genome deep learning
Source: Springer Nature journal article supplement (doi:10.1038/s41598-019-53989-3), 2019-11-21
Supplement: MOESM1 [file 41598_2019_53989_MOESM1_ESM.pdf]

# Identification of 12 cancer types through genome deep learning

Yingshuai Sun<sup>1,\*</sup>, Sitao Zhu<sup>1,\*</sup>, Kailong Ma<sup>2</sup>, Weiqing Liu<sup>1</sup>, Yao Yue<sup>1</sup>, Gang Hu<sup>1</sup>, Huifang Lu<sup>2</sup>, Wenbin Chen<sup>2,#</sup>

## Supplementary Information

Table S1: Distribution of point mutation site

| Variant types                           | Number |
|-----------------------------------------|--------|
| missense_variant.stat                   | 10946  |
| synonymous_variant.stat                 | 4500   |
| 3_prime_UTR_variant.stat                | 3018   |
| frameshift_variant.stat                 | 2829   |
| stop_gained.stat                        | 1389   |
| intron_variant.stat                     | 1070   |
| non_coding_transcript_exon_variant.stat | 550    |
| 5_prime_UTR_variant.stat                | 543    |
| downstream_gene_variant.stat            | 306    |
| splice_region_variant.stat              | 195    |
| upstream_gene_variant.stat              | 170    |
| splice_acceptor_variant.stat            | 49     |
| splice_donor_variant.stat               | 44     |
| inframe_insertion.stat                  | 30     |
| inframe_deletion.stat                   | 25     |
| protein_altering_variant.stat           | 17     |
| start_lost.stat                         | 12     |
| mature_miRNA_variant.stat               | 9      |
| stop_retained_variant.stat              | 5      |
| coding_sequence_variant.stat            | 3      |
| stop_lost.stat                          | 1      |

Table S2: Modeling accuracy of 12 kinds of cancer in different dimensions

| Cancer \ Dimension | 1k     | 2k     | 3k     | 4k     | 5k     | 6k     | 7k     | 8k     | 9k     | 10k    |
|--------------------|--------|--------|--------|--------|--------|--------|--------|--------|--------|--------|
| BLCA               | 0.9375 | 0.9438 | 0.9579 | 0.9604 | 0.9346 | 0.9636 | 0.9561 | 0.9487 | 0.9590 | 0.9843 |
| BRCA               | 0.9132 | 0.9302 | 0.9419 | 0.9612 | 0.9496 | 0.9612 | 0.9671 | 0.9613 | 0.9600 | 0.9789 |
| COAD               | 0.9811 | 0.9841 | 0.9718 | 0.9813 | 0.9831 | 0.9648 | 0.9954 | 0.9866 | 0.9922 | 0.9924 |
| GBM                | 0.8298 | 0.8796 | 0.8917 | 0.9048 | 0.9412 | 0.9257 | 0.9487 | 0.9699 | 0.9657 | 0.9836 |
| KIRC               | 0.8971 | 0.9487 | 0.9518 | 0.9884 | 0.9890 | 0.9560 | 0.9600 | 0.9811 | 1.0000 | 1.0000 |
| LGG                | 0.8750 | 0.9569 | 0.9542 | 0.9930 | 0.9545 | 0.9699 | 0.9829 | 0.9891 | 0.9740 | 0.9950 |
| LUSC               | 0.9223 | 0.9554 | 0.9661 | 0.9675 | 0.9766 | 0.9771 | 0.9852 | 0.9926 | 0.9928 | 1.0000 |
| OV                 | 0.9565 | 0.9590 | 0.9764 | 0.9771 | 0.9778 | 1.0000 | 0.9860 | 0.9932 | 0.9799 | 1.0000 |
| PRAD               | 0.8228 | 0.8774 | 0.8833 | 0.9542 | 0.9313 | 0.9494 | 0.9222 | 0.9494 | 0.9626 | 0.9697 |
| SKCM               | 0.9663 | 0.9888 | 0.9908 | 0.9750 | 0.9924 | 0.9781 | 0.9861 | 0.9671 | 0.9565 | 0.9882 |
| THCA               | 0.9028 | 0.9278 | 0.9545 | 0.9583 | 0.9603 | 0.9695 | 0.9779 | 0.9784 | 0.9930 | 0.9866 |
| UCEC               | 0.9650 | 0.9740 | 0.9682 | 0.9677 | 0.9549 | 0.9514 | 0.9671 | 0.9721 | 0.9527 | 0.9773 |

Table S3: Confusion matrix of mixture mode

| Label \ Predicate | BLCA | BRCA | COAD | GBM | KIRC | LGG | LUSC | OV | PRAD | SKCM | THCA | UCEC |
|-------------------|------|------|------|-----|------|-----|------|----|------|------|------|------|
| BLCA              | 29   | 4    | 0    | 0   | 0    | 0   | 31   | 1  | 5    | 4    | 1    | 1    |
| BRCA              | 2    | 183  | 0    | 2   | 1    | 1   | 6    | 10 | 1    | 1    | 0    | 18   |
| COAD              | 1    | 1    | 72   | 1   | 2    | 0   | 2    | 4  | 0    | 0    | 0    | 10   |
| GBM               | 0    | 2    | 0    | 48  | 0    | 4   | 22   | 9  | 10   | 2    | 1    | 2    |
| KIRC              | 2    | 5    | 0    | 1   | 23   | 0   | 1    | 3  | 8    | 0    | 1    | 2    |
| LGG               | 1    | 0    | 0    | 3   | 0    | 70  | 1    | 0  | 3    | 0    | 0    | 0    |
| LUSC              | 8    | 2    | 0    | 4   | 2    | 0   | 81   | 4  | 3    | 3    | 0    | 3    |
| OV                | 1    | 11   | 0    | 4   | 1    | 0   | 6    | 90 | 1    | 0    | 0    | 0    |
| PRAD              | 3    | 4    | 1    | 1   | 5    | 3   | 11   | 0  | 19   | 1    | 0    | 1    |
| SKCM              | 3    | 0    | 0    | 1   | 1    | 0   | 9    | 0  | 3    | 82   | 0    | 0    |
| THCA              | 2    | 1    | 0    | 0   | 1    | 2   | 2    | 0  | 6    | 2    | 26   | 0    |
| UCEC              | 0    | 20   | 2    | 1   | 0    | 0   | 7    | 1  | 0    | 2    | 0    | 78   |

Table S4: Confusion matrix of mixture model two-way judgment error

| Label \ Predicate | BLCA | BRCA | COAD | GBM | KIRC | LGG | LUSC | OV | PRAD | SKCM | THCA | UCEC |
|-------------------|------|------|------|-----|------|-----|------|----|------|------|------|------|
| BLCA              | 29   | 0    | 0    | 0   | 0    | 0   | 0    | 0  | 0    | 0    | 0    | 0    |
| BRCA              | 6    | 183  | 0    | 0   | 0    | 0   | 0    | 0  | 0    | 0    | 0    | 0    |
| COAD              | 1    | 1    | 72   | 0   | 0    | 0   | 0    | 0  | 0    | 0    | 0    | 0    |
| GBM               | 0    | 4    | 1    | 48  | 0    | 0   | 0    | 0  | 0    | 0    | 0    | 0    |
| KIRC              | 2    | 6    | 2    | 1   | 23   | 0   | 0    | 0  | 0    | 0    | 0    | 0    |
| LGG               | 1    | 1    | 0    | 7   | 0    | 70  | 0    | 0  | 0    | 0    | 0    | 0    |
| LUSC              | 39   | 8    | 2    | 26  | 3    | 1   | 81   | 0  | 0    | 0    | 0    | 0    |
| OV                | 2    | 21   | 4    | 13  | 4    | 0   | 10   | 90 | 0    | 0    | 0    | 0    |
| PRAD              | 8    | 5    | 1    | 11  | 13   | 6   | 14   | 1  | 19   | 0    | 0    | 0    |
| SKCM              | 7    | 1    | 0    | 3   | 1    | 0   | 12   | 0  | 4    | 82   | 0    | 0    |
| THCA              | 3    | 1    | 0    | 1   | 2    | 2   | 2    | 0  | 6    | 2    | 26   | 0    |
| UCEC              | 1    | 38   | 12   | 3   | 2    | 0   | 10   | 1  | 1    | 2    | 0    | 78   |

Table S5: Mixed matrices of the same dimensions for different cancers

| Lable \ Label | BLCA | BRCA | COAD | GBM | KIRC | LGG | LUSC | OV  | PRAD | SKCM | THCA | UCEC |
|---------------|------|------|------|-----|------|-----|------|-----|------|------|------|------|
| BLCA          | 1369 |      |      |     |      |     |      |     |      |      |      |      |
| BRCA          | 30   | 994  |      |     |      |     |      |     |      |      |      |      |
| COAD          | 23   | 88   | 8497 |     |      |     |      |     |      |      |      |      |
| GBM           | 16   | 25   | 28   | 533 |      |     |      |     |      |      |      |      |
| KIRC          | 5    | 11   | 7    | 4   | 67   |     |      |     |      |      |      |      |
| LGG           | 19   | 30   | 20   | 29  | 4    | 216 |      |     |      |      |      |      |
| LUSC          | 43   | 26   | 25   | 14  | 3    | 24  | 889  |     |      |      |      |      |
| OV            | 19   | 60   | 27   | 24  | 3    | 24  | 32   | 471 |      |      |      |      |
| PRAD          | 13   | 10   | 11   | 10  | 4    | 13  | 12   | 7   | 102  |      |      |      |
| SKCM          | 6    | 4    | 36   | 6   | 0    | 6   | 12   | 6   | 1    | 6000 |      |      |
| THCA          | 8    | 2    | 7    | 3   | 1    | 4   | 5    | 2   | 5    | 5    | 98   |      |
| UCEC          | 26   | 103  | 899  | 24  | 8    | 23  | 25   | 21  | 11   | 56   | 3    | 8000 |
