# Supplementary material for: Identification of 12 cancer types through genome deep learning
Source: Sci Rep. 2019 Nov 21;9:17256. doi: 10.1038/s41598-019-53989-3 (PMC6872744; doi:10.1038/s41598-019-53989-3)
Supplement: Supplementary file 3 — Dataset1 [file 41598_2019_53989_MOESM3_ESM.xlsx]

## Sheet: BLCA
chr10:g.94402613G>A
chr10:g.94402611C>T
chr4:g.1801841C>G
chr3:g.179218303G>A
chr3:g.179218294G>A
chr17:g.39711955C>T
chr17:g.7674220C>T
chr17:g.7673781C>G
chr9:g.134436505C>T
chr17:g.7673767C>T
chr3:g.185152807G>A
chr19:g.45364429T>C
chr4:g.1804372A>G
chrX:g.45063557C>T
chr4:g.152326137G>C
chr2:g.20447979G>A
chr17:g.7673537G>A
chr7:g.17335775G>C
chr2:g.197400729C>T
chr6:g.87589942G>A
chr5:g.41009375C>T
chr1:g.145578886T>C
chr3:g.179234297A>G
chr17:g.7673809C>T
chr12:g.25245350C>T
chr13:g.48411476G>A
chr12:g.20370109G>A
chr17:g.7673781C>T
chr17:g.7673803G>A
chrX:g.124063161C>T
chr2:g.177234217G>C
chr17:g.7674241G>A
chr7:g.5528611C>T
chr4:g.1804362G>T
chr10:g.73849279G>A
chr6:g.32189708C>T
chr5:g.34867018G>A
chr3:g.179218303G>C
chr17:g.7674221G>A
chr17:g.7674957G>A
chr19:g.54430888C>T
chr17:g.19188070G>A
chr7:g.148787088G>A
chr3:g.48661569C>T
chr17:g.7675088C>T
chr7:g.93886864G>A
chr1:g.42456903C>T
chr22:g.41155096C>T
chr12:g.81143195C>T
chr17:g.7675216C>G
chr17:g.7670703C>A
chr3:g.49375451C>T
chr2:g.97792516C>T
chr19:g.45368961T>C
chr12:g.5969264G>A
chr22:g.46463746C>T
chr17:g.75828889C>T
chr3:g.192798931G>C
chr19:g.49462658G>A
chr7:g.148787094G>A
chr7:g.149811982C>T
chr12:g.56085070G>T
chr1:g.149886428G>C
chr13:g.113422915G>A
chr18:g.31157548C>G
chr12:g.56085033G>A
chr15:g.90881570C>T
chr11:g.533874T>A
chr6:g.36684129C>T
chr2:g.10912898G>A
chr6:g.36684210_36684211insT
chr17:g.7673776G>A
chr11:g.65054605C>T
chr11:g.533875G>T
chr14:g.23567374C>T
chr12:g.14774425G>A
chr18:g.23530040G>A
chr15:g.101759775G>T
chr14:g.49634390G>A
chr12:g.121016393C>T
chr11:g.67999225G>C
chr17:g.39711955C>A
chr4:g.1801837C>T
chr9:g.68303564A>C
chr15:g.101759755C>G
chr1:g.120833687T>C
chr16:g.56748290C>T
chr19:g.45369122G>A
chr11:g.64220607G>A
chr6:g.26031667G>C
chr11:g.130915733G>A
chr12:g.53213560G>A
chr9:g.21971121G>A
chr1:g.59674073C>G
chr1:g.58782737C>T
chr19:g.54143151G>A
chr19:g.50702506C>T
chr17:g.36940809C>T
chr17:g.7675139C>T
chr9:g.21971037C>T
chr10:g.45827364T>G
chr12:g.56088753G>A
chr9:g.127196578G>A
chr6:g.1313108C>T
chr3:g.47577671C>T
chr19:g.45370197T>C
chr1:g.33096801C>T
chr1:g.201468543C>T
chr4:g.109816202G>C
chr17:g.37512326G>A
chr17:g.7675136G>A
chr1:g.85582433C>T
chr3:g.153162653G>A
chr3:g.132352816G>A
chr11:g.83166635G>A
chr2:g.20447688C>A
chrX:g.45082613C>G
chr8:g.131039885C>T
chr1:g.35190502G>A
chr1:g.8557518C>G
chr12:g.8222464G>C
chr17:g.65014793T>C
chr19:g.10378269G>A
chr6:g.26273204G>A
chr17:g.7674921C>A
chr4:g.73419558G>A
chr19:g.42583298C>G
chr11:g.64835530C>T
chr20:g.33767015C>T
chr1:g.26729690C>T
chr1:g.66984754G>C
chr6:g.26031657C>G
chr8:g.22201144C>T
chr8:g.144512921C>G
chr12:g.109880321G>C
chr11:g.65505009G>A
chr15:g.33819806A>G
chr7:g.149784890C>G
chr10:g.45754995G>C
chr16:g.84838439C>T
chr4:g.7043778G>A
chr3:g.100162315G>A
chrX:g.16841767G>C
chr1:g.155277777C>T
chr17:g.80140053C>G
chr17:g.39725079G>A
chr8:g.90001549C>T
chrX:g.96958050C>T
chr19:g.11950014C>G
chr21:g.44901621G>A
chr15:g.90255797G>T
chr9:g.132278213G>A
chr2:g.63885770G>C
chr3:g.39187953G>C
chr2:g.29920035G>A
chr16:g.29664905G>A
chr11:g.108335096G>A
chr19:g.3590174G>C
chr8:g.23432995C>T
chr10:g.34269742G>A
chr19:g.35618137G>A
chr20:g.51639455C>T
chr1:g.45515788G>C
chr4:g.87663324C>T
chrX:g.15790958G>A
chrX:g.71251193C>G
chr16:g.89749855G>A
chr2:g.79121690G>A
chr18:g.65880643G>C
chr19:g.44081136C>T
chr19:g.45472937C>T
chr22:g.26292990G>A
chr1:g.202013201G>C
chr11:g.46616074G>A
chr2:g.95149751G>A
chr17:g.7321750G>A
chr3:g.97877312G>A
chr7:g.99679910C>T
chr19:g.12647567G>A
chr7:g.47304907G>A
chr8:g.101492706G>A
chr16:g.4874781C>T
chr8:g.109563399C>G
chr7:g.78256239G>A
chr7:g.101163547C>T
chr17:g.38330155C>T
chr16:g.30353966C>G
chr11:g.534286C>G
chr1:g.145961476G>A
chr7:g.85042286C>G
chr1:g.107056907C>T
chr4:g.83536699C>T
chrX:g.45083494delC
chr19:g.12363582G>C
chr1:g.149005170C>G
chr1:g.248850206G>C
chr12:g.120716714C>G
chr3:g.132722280C>T
chr22:g.29351722G>C
chr7:g.47428345G>A
chr1:g.160711709G>A
chr17:g.41516905C>T
chr7:g.99499924G>A
chr19:g.45884607C>T
chr7:g.101040246G>C
chr7:g.142618952C>G
chr12:g.52381432C>T
chrX:g.71118851G>A
chr1:g.209632608G>A
chr17:g.7674230C>T
chr20:g.46241168C>G
chr11:g.116762882G>A
chr17:g.31530459C>T
chr3:g.146533530G>T
chr6:g.107459230G>A
chr6:g.18122555C>G
chr18:g.50284040C>T
chr5:g.141178728G>A
chr19:g.8552152C>G
chr7:g.87369375G>C
chr3:g.119492481C>T
chr2:g.99582911C>T
chr12:g.10809284C>G
chr7:g.99493630C>G
chr7:g.74519626C>G
chr4:g.152326013G>A
chr10:g.122086259G>A
chr7:g.133253163C>A
chr19:g.57727412C>T
chr6:g.7229303C>T
chr1:g.154983787C>G
chr5:g.6737598G>A
chr17:g.46978753G>A
chr6:g.112155609C>T
chr1:g.39410388G>A
chr16:g.55656842G>A
chr20:g.59996542G>A
chr22:g.20995754C>G
chr20:g.45208284G>A
chr19:g.55316919G>A
chr8:g.143817103G>A
chr2:g.9412310C>G
chr11:g.59443806C>T
chr5:g.151554632G>A
chr1:g.26773899G>A
chr4:g.1804365A>T
chr2:g.223597821C>G
chr2:g.26278724G>C
chr19:g.39892056C>T
chr2:g.20447604G>A
chr14:g.102036593G>A
chr16:g.9829485G>A
chr19:g.11436044G>A
chr22:g.15690296G>A
chr16:g.2762135C>T
chr3:g.49896324C>T
chr4:g.99581951C>G
chr22:g.50529687C>T
chr22:g.50281519C>T
chr1:g.151705852C>T
chr11:g.62521968G>A
chr11:g.70206293G>C
chr15:g.59058452C>T
chr1:g.26732713C>T
chr7:g.98994638G>C
chr17:g.48033866C>G
chr1:g.92244331C>T
chr16:g.31184330C>T
chr6:g.26022003C>T
chr12:g.11884474C>G
chr12:g.122854068C>T
chr17:g.45267662C>T
chr3:g.12392623C>T
chr7:g.144318529G>A
chr12:g.2633667C>T
chr2:g.27079144C>G
chr6:g.36684247G>A
chr10:g.121479994C>T
chr17:g.50358483G>A
chr12:g.49039611G>A
chr19:g.18573370G>C
chr21:g.44967122C>T
chr22:g.37927558C>G
chr10:g.87864518C>T
chr17:g.28563894G>C
chr1:g.152306251C>G
chr19:g.32353048C>G
chr10:g.103447509G>C
chr6:g.118911722G>C
chr19:g.10159956G>C
chr7:g.23585223C>T
chr10:g.31520332G>C
chr4:g.109945220G>A
chr7:g.130051255C>T
chr3:g.12909306C>T
chr19:g.53070092C>T
chr3:g.184038817G>A
chr11:g.6401472G>C
chr16:g.87414509G>A
chr14:g.91234786G>T
chr7:g.129755091G>A
chr4:g.1806162A>G
chr14:g.62981136G>C
chr4:g.47572230G>A
chr6:g.41940954G>A
chr12:g.132777035C>T
chr6:g.29044911C>G
chr6:g.26055889C>T
chr11:g.69641435C>T
chr2:g.48580962C>T
chr20:g.4869831C>T
chr3:g.139476445C>G
chr8:g.109448344T>C
chr6:g.35510919C>G
chr4:g.84648696G>C
chr6:g.31580700C>T
chr19:g.6692942C>T
chr7:g.101163168G>A
chr2:g.144389816C>T
chr12:g.40283941G>A
chr6:g.11778763G>A
chr18:g.37259182G>A
chr20:g.20075492C>G
chr16:g.67649500C>T
chr16:g.31962172T>G
chr16:g.75112407G>C
chr17:g.74745187C>G
chr3:g.58163341C>G
chr1:g.40258169C>T
chr17:g.75020566G>A
chr7:g.2433507G>A
chr2:g.119656414G>A
chrX:g.153768945C>G
chr12:g.8604839G>T
chr22:g.22823054C>G
chr12:g.122266360C>T
chr17:g.40291660G>C
chr7:g.33505616C>T
chr19:g.726158C>T
chr19:g.41410771C>G
chr19:g.15683739C>T
chr19:g.30549485C>T
chr1:g.212387021G>C
chr15:g.51480078G>A
chr11:g.10305853G>A
chr4:g.5460195C>A
chr19:g.55000770G>C
chr4:g.152328233G>A
chr2:g.213049826T>C
chr12:g.49022308C>G
chr12:g.53213648G>A
chr17:g.29562630C>G
chr15:g.48738936G>A
chr2:g.75673446C>G
chr14:g.37591368delG
chr17:g.31521163C>T
chr7:g.23256996G>A
chr7:g.44708080C>T
chr6:g.55874821G>C
chr19:g.47694506C>G
chr19:g.54217321C>T
chr7:g.77910406C>G
chr19:g.54596458C>T
chr13:g.24709424C>T
chr7:g.149832847G>A
chr10:g.24607533C>T
chr2:g.27577374G>A
chr17:g.7673568C>T
chr12:g.49054922G>A
chr4:g.37902307C>T
chr2:g.151679924G>C
chr4:g.68567977G>C
chr6:g.57090235C>T
chr21:g.43687682G>T
chr7:g.27174275G>A
chr1:g.113838029C>T
chr15:g.33635750G>A
chr17:g.74849904G>A
chr2:g.177234232C>G
chr8:g.144213078C>T
chr17:g.7673809C>G
chr18:g.57684162C>T
chr1:g.226883818G>A
chr18:g.49489523C>G
chr16:g.28924407C>T
chr20:g.13785258G>T
chr1:g.52064936G>C
chr6:g.26123676C>T
chr20:g.62857460C>G
chr1:g.19780722G>A
chr6:g.155256455C>T
chr6:g.26188721G>A
chr2:g.32415868C>G
chr2:g.63055862C>T
chr3:g.9917356G>A
chr7:g.134127380G>C
chr16:g.5027280C>G
chr1:g.235583778C>T
chr19:g.17497309G>A
chr17:g.41489695G>C
chrX:g.124083530C>T
chr4:g.2930986G>A
chr3:g.42638604C>T
chr19:g.48900888G>A
chr17:g.66964989C>T
chr1:g.26760967C>T
chr21:g.44369230G>A
chr11:g.45224631C>T
chr6:g.25776906C>T
chr15:g.77178938G>C
chr8:g.94641436C>T
chr6:g.15468656C>T
chr2:g.55617333C>T
chr16:g.12078892C>T
chr17:g.39187509G>C
chr5:g.141331589C>G
chr4:g.4321137G>A
chr19:g.43204053C>G
chr17:g.1575649G>C
chr2:g.178580298G>A
chr2:g.177234082C>T
chr3:g.36993604C>T
chr7:g.99650142G>C
chr6:g.54124602C>G
chr3:g.37993922G>A
chr4:g.786671C>T
chr1:g.36296730_36296731insA
chr2:g.239139726C>T
chr8:g.18684032G>C
chr4:g.70249142C>T
chr13:g.38688415C>T
chr3:g.132352800G>A
chr14:g.106185083G>A
chr16:g.67293560C>T
chr5:g.140801410C>A
chr21:g.14964851C>T
chr6:g.26234799G>A
chr17:g.41364972C>T
chr16:g.29485611C>G
chr2:g.179954307G>A
chr2:g.27669288G>A
chr3:g.50299295C>T
chr11:g.15075154G>A
chr16:g.67830518G>C
chr16:g.67865197G>C
chr3:g.194438861C>G
chr2:g.182935359C>G
chr1:g.171323166G>C
chr1:g.26766318C>T
chr13:g.26682899G>A
chr5:g.177209969G>A
chr3:g.47827417C>T
chr11:g.2404862C>A
chr2:g.236166385C>T
chr11:g.1196473C>T
chr19:g.49740144C>T
chr3:g.160432361G>C
chr17:g.11608182G>A
chr9:g.128068566G>A
chr14:g.91234616G>A
chr6:g.26055784C>T
chr6:g.111373467C>G
chr11:g.108304693C>T
chr19:g.10320748G>C
chr3:g.179234297A>T
chr1:g.83907632G>A
chr17:g.64800609G>A
chr19:g.7619998C>T
chr7:g.134934045G>C
chrX:g.55487854C>G
chr9:g.133360045C>T
chr8:g.12725747C>T
chr5:g.78360616C>G
chr14:g.38209710C>A
chr11:g.67501996C>T
chr22:g.36497996C>T
chr15:g.93014813C>T
chr6:g.73518511G>C
chr8:g.143605780C>G
chr19:g.48304014G>A
chr1:g.235448363C>G
chr8:g.144932415C>T
chr19:g.11237458C>T
chr22:g.50084783C>T
chr1:g.113837977G>C
chr4:g.67673733G>A
chr1:g.3890986C>T
chr1:g.233252554G>C
chr8:g.79611179G>A
chr22:g.41169571A>G
chr9:g.122826694G>A
chr2:g.119882146C>G
chr2:g.24037709G>C
chr19:g.6591021C>T
chr3:g.179221146G>A
chr15:g.58065586G>A
chr5:g.13840918G>C
chr1:g.77521934C>T
chr12:g.25245350C>A
chr2:g.73291420G>A
chr11:g.66422517C>T
chr17:g.49619073C>G
chr1:g.200908843G>A
chr6:g.32085903C>T
chr7:g.100553406C>T
chr19:g.21116905G>C
chrX:g.103713984C>G
chr1:g.6124081C>A
chr9:g.95508193C>T
chr12:g.132791290C>T
chr14:g.20460202G>T
chr7:g.100319970G>A
chr1:g.148966952C>T
chr18:g.13092446C>T
chr1:g.161000718G>A
chr4:g.110621205C>T
chr2:g.25756066C>G
chr19:g.54575887C>A
chr1:g.42456643C>T
chr2:g.88575431G>A
chr15:g.88906653G>A
chr7:g.71787790C>G
chr15:g.74023312G>A
chr20:g.37301336G>A
chr3:g.81536953C>T
chr17:g.78419543C>G
chr6:g.144187308C>G
chr6:g.73519390C>T
chr19:g.55881519G>C
chr2:g.96143910G>A
chr17:g.41811174G>A
chr16:g.3781262G>A
chr7:g.5065104G>C
chr10:g.73376218C>G
chr1:g.32226316G>C
chr8:g.116850644delC
chr6:g.10695067G>A
chr15:g.69429189G>A
chr18:g.24082992G>A
chr14:g.94174434C>G
chr15:g.74802041C>G
chr1:g.48298627A>T
chr4:g.40438368C>T
chr3:g.52802801G>A
chr14:g.95662634C>T
chr15:g.22943220C>T
chr3:g.12406008C>T
chr2:g.108294264G>C
chr3:g.185918370G>A
chr6:g.52836352G>A
chr2:g.32250639C>G
chr19:g.12681620G>A
chr2:g.74530018G>A
chr19:g.55320581G>T
chr15:g.41775308G>A
chr12:g.25245328C>G
chr7:g.157169058G>A
chr2:g.9904925C>T
chr2:g.54629332C>T
chr5:g.141640089G>A
chr1:g.43553930C>T
chr12:g.120557650G>A
chr19:g.5866602C>G
chr1:g.26889689G>A
chr4:g.54738646C>T
chr3:g.19515386G>A
chr16:g.3289455C>T
chr2:g.160013327G>A
chr18:g.14479339C>T
chr1:g.1331478G>A
chr2:g.190436760C>G
chr6:g.36684421_36684422insG
chr8:g.100288026G>A
chr1:g.42545555G>A
chr8:g.74849370C>G
chr8:g.52940813C>T
chr22:g.31873293C>G
chr19:g.5244375C>T
chr8:g.78601898G>C
chr12:g.114394848C>T
chr9:g.137012807C>T
chr19:g.44386934G>A
chr8:g.21909532G>A
chr17:g.48529835G>A
chr11:g.27057283G>C
chr19:g.50716298C>G
chr8:g.143943899C>T
chr10:g.104353812C>T
chr2:g.98380181G>A
chr10:g.86960039G>A
chr11:g.56137561G>C
chrX:g.123888627G>A
chr1:g.40462639C>G
chr1:g.10304607C>T
chr17:g.58703294T>C
chr8:g.55773529G>A
chr3:g.138946516C>G
chr11:g.617419C>T
chr12:g.54281460G>A
chr3:g.8548904G>A
chr2:g.144389816C>G
chr11:g.6260077G>A
chr14:g.93183705C>T
chr5:g.71650121G>C
chr19:g.40209194C>T
chr7:g.149103734G>A
chr6:g.152369094G>A
chr1:g.10321706C>T
chr17:g.42201653G>C
chrX:g.141905480C>T
chr6:g.43282832C>T
chr9:g.124881834C>G
chr12:g.93849967C>T
chr8:g.92005144C>T
chr17:g.19003780G>C
chr19:g.12381041G>C
chr19:g.23146223G>C
chr7:g.152311933G>A
chr19:g.16490398C>T
chr20:g.31950343C>T
chr1:g.24442180C>T
chr15:g.41332419G>A
chr16:g.20737866G>C
chr1:g.16720064C>T
chr14:g.21499110C>T
chr13:g.72727613G>A
chr22:g.48576480G>A
chr2:g.120349106C>T
chr17:g.7572807G>C
chr17:g.27640633C>T
chr20:g.47636317C>G
chr1:g.114713908T>C
chr6:g.83854103G>A
chr4:g.39480575G>A
chr8:g.8318175C>T
chr9:g.87922110G>C
chr14:g.100149106G>A
chr19:g.11949389C>T
chr11:g.86337511C>T
chr7:g.56015133C>T
chr2:g.69781552C>T
chr11:g.43359023C>T
chr1:g.15660086C>A
chr8:g.86508605G>C
chr15:g.90638788G>A
chr1:g.230943820C>G
chr3:g.179210291G>A
chr4:g.26957614C>T
chr1:g.152109243C>G
chr1:g.26731320C>T
chr3:g.120750768C>G
chr10:g.61428951C>A
chr15:g.21439756G>T
chr11:g.64266525C>T
chr16:g.29841638G>A
chr16:g.70512280C>T
chr11:g.62527838C>G
chr14:g.104943881G>A
chr6:g.27814652C>T
chr2:g.45389325G>A
chr7:g.99532267G>C
chr14:g.103727848G>C
chr17:g.39530956G>A
chr9:g.132907371C>T
chr7:g.33505616C>G
chr19:g.48873819G>A
chr16:g.68352381C>T
chr22:g.36286738C>T
chr11:g.35619207G>A
chr15:g.89576109G>A
chr12:g.49050901G>A
chr17:g.80086053G>A
chr3:g.195726459G>A
chr22:g.29231041G>C
chr3:g.52211365C>T
chr1:g.202013277G>C
chr19:g.677931C>T
chr10:g.96318476T>C
chr6:g.26234691G>C
chr11:g.64297000C>T
chr8:g.48918779C>G
chr10:g.100233147C>T
chr4:g.186619101G>A
chr7:g.1092640C>T
chr20:g.35557512C>T
chr18:g.76984888C>T
chr19:g.54818366G>A
chr1:g.6148869G>A
chr14:g.101029633C>T
chr7:g.48643285C>T
chr19:g.12884774C>T
chr17:g.31227232C>T
chr12:g.26486211C>T
chr16:g.84085037G>C
chrX:g.34131197C>T
chr1:g.180065217G>A
chr5:g.141209429G>A
chr6:g.149680211C>G
chr1:g.150998162G>A
chr4:g.76309309C>G
chr19:g.52706489G>A
chr11:g.17412715C>T
chr12:g.95474141C>T
chr6:g.27872024C>T
chr1:g.36301017C>G
chr15:g.82345252T>A
chr7:g.26197675C>T
chr17:g.56594785G>A
chr17:g.7675195C>G
chr11:g.3005417C>T
chr12:g.112978722G>A
chr5:g.138319237C>T
chr19:g.52034767G>A
chr19:g.1434779C>G
chr2:g.33588427G>A
chr1:g.40463531C>T
chr16:g.22280325G>A
chr19:g.43546087C>T
chr19:g.48961099C>G
chr4:g.107720187G>A
chr11:g.65506286G>C
chr4:g.88823164C>T
chr17:g.44015043C>G
chr1:g.153958411C>T
chr2:g.207930964G>A
chr5:g.38407102G>A
chr13:g.27435141C>T
chr3:g.138946371C>T
chr19:g.50794843C>G
chr3:g.184389433G>A
chr2:g.202035041G>A
chr19:g.42370201G>A
chr16:g.20963846G>A
chr17:g.18161331G>A
chr12:g.120727071C>T
chr17:g.8173446C>T
chr7:g.1476638G>C
chr17:g.75978872G>C
chr7:g.93105446C>T
chr11:g.62525752C>G
chr8:g.56168207C>T
chr13:g.20034341G>A
chr1:g.1333352G>A
chr19:g.54939483G>A
chr19:g.45353098C>G
chr11:g.75587166G>C
chr8:g.23255333C>T
chr19:g.37611982G>C
chr12:g.14614931C>T
chr4:g.6576637C>T
chr1:g.148536242A>T
chr13:g.35045342C>T
chr8:g.99854198G>A
chr4:g.49050763C>T
chr10:g.122632863C>G
chr17:g.7675064G>C
chr1:g.208039683C>T
chr17:g.62576706C>T
chr7:g.116699253C>G
chr8:g.132002655G>A
chr22:g.27799129G>A
chr1:g.32224455G>C
chr17:g.50357186G>A
chr15:g.101753689G>A
chrX:g.8466180G>C
chr20:g.33623137G>A
chr1:g.241787925G>T
chr12:g.10809589C>G
chr4:g.87185343C>T
chr12:g.55320801G>C
chr12:g.120438149C>T
chr13:g.106534968G>A
chr11:g.534288C>T
chr3:g.113660892C>T
chr4:g.145654073G>A
chr5:g.141945786C>T
chr17:g.81700780C>T
chr4:g.83063105C>G
chr17:g.21415688G>A
chr12:g.34022708G>A
chr3:g.138655463C>T
chr1:g.215083402C>G
chr7:g.95318374G>A
chr19:g.47480812C>G
chr17:g.62265075G>C
chr17:g.7673740C>A
chr16:g.58587875G>A
chr14:g.104707930C>T
chr7:g.44697409G>C
chr1:g.202012435delTGG
chr15:g.85580410C>T
chr2:g.11824784C>T
chr21:g.10578577C>T
chr4:g.70764574C>G
chr17:g.8448564C>T
chr8:g.123775214C>T
chr8:g.52661596T>C
chr11:g.128772969C>T
chr6:g.26225446G>A
chr5:g.146590145C>T
chr9:g.6015556C>G
chr11:g.47293880C>T
chr1:g.62238306C>T
chr3:g.179204536G>A
chr1:g.153958423C>T
chr19:g.30444052G>T
chr9:g.128624430G>A
chr16:g.57516328C>T
chr13:g.48360058C>T
chr10:g.30698440C>T
chr6:g.145954764C>G
chr3:g.129039793C>T
chr4:g.1804392G>A
chr19:g.40843944C>T
chr7:g.37920766C>T
chr17:g.31295879G>C
chr4:g.61998233G>A
chr7:g.149071328G>A
chr3:g.133805888G>A
chr2:g.96762061C>T
chr6:g.18122555C>T
chr22:g.36301536G>A
chrX:g.48688690G>C
chr17:g.7076976G>A
chr10:g.3781749C>T
chr1:g.43957455C>T
chr16:g.3749626C>T
chr3:g.149502679G>C
chr11:g.111766320C>T
chr17:g.7675131C>T
chr17:g.3530073G>A
chr16:g.4895713G>A
chr20:g.63564957C>G
chr2:g.119245508G>C
chr6:g.43509710G>T
chr2:g.222232280G>A
chr12:g.43532071G>A
chr18:g.9255146G>A
chr6:g.26156329C>G
chr19:g.2110748G>A
chr7:g.150742459C>G
chr16:g.71537731G>A
chr4:g.151760932G>A
chr2:g.55588911C>G
chr11:g.94063624G>A
chr5:g.141180381G>C
chr15:g.24968010C>T
chr6:g.36684104delGTCAGAACCGGCTGGGGATGTCC
chr1:g.143904394G>C
chr19:g.8551748C>T
chr19:g.57687997C>G
chr11:g.65503624G>C
chr4:g.161542584C>T
chr12:g.827130C>G
chr19:g.10491954C>T
chr15:g.72163307C>T
chr17:g.39708403G>A
chr15:g.88858972G>C
chr10:g.4835735C>G
chr6:g.26188766C>T
chr1:g.155747914G>A
chr5:g.132881085G>A
chr1:g.237643419C>T
chr17:g.28361276G>C
chr4:g.110509758C>G
chrX:g.101353289C>T
chr9:g.39446410G>C
chr19:g.48497496G>A
chr20:g.64092864C>T
chr10:g.26216809G>T
chr19:g.42924809C>T
chr13:g.23332877G>A
chr1:g.93582718G>A
chr20:g.2658474C>T
chr6:g.25465937G>A
chr1:g.182858578C>G
chr10:g.88583239C>T
chr13:g.48452997C>T
chr4:g.48860853C>G
chr1:g.153958547C>G
chr2:g.214948708G>A
chr3:g.157364366G>C
chr14:g.57269266C>T
chr17:g.7846673C>T
chr1:g.158755226C>T
chr19:g.758421C>T
chr5:g.55767913C>T
chr7:g.6140952G>C
chr19:g.3736307G>A
chr19:g.40560156C>T
chr1:g.11037780A>G
chr19:g.11008022G>C
chr21:g.36245566G>A
chr5:g.83537010G>A
chr17:g.7675160G>T
chr8:g.143813523G>A
chr22:g.37300938G>A
chr19:g.8126493C>T
chr6:g.1313139delCAA
chr10:g.105262433C>T
chr6:g.44248681C>T
chr17:g.443455G>T
chr17:g.7673761C>A
chr1:g.148952967C>T
chr2:g.218782393C>T
chr6:g.35955235G>C
chr2:g.118843097G>A
chr1:g.151169050G>A
chr10:g.119826658C>T
chr11:g.119173996C>G
chr2:g.97792575C>T
chr22:g.19964215G>A
chr9:g.127658431C>G
chr10:g.93600975C>T
chr12:g.121442668C>T
chr3:g.184291425G>A
chr3:g.192798931G>A
chr20:g.46726976C>T
chr19:g.54114668G>A
chr3:g.14704595C>G
chr15:g.52340354C>T
chr11:g.74098097C>G
chr3:g.49720515G>C
chr12:g.132750850C>G
chr12:g.104805131G>C
chr11:g.62649487G>A
chr9:g.137156754G>A
chr8:g.56073728G>A
chr11:g.75204594C>T
chr17:g.4934218C>T
chr6:g.26184017C>T
chr2:g.32114737C>T
chr21:g.31146978G>A
chr1:g.152112337C>G
chr17:g.7674229C>A
chr1:g.118081449C>T
chr14:g.90786245G>A
chr17:g.47404602G>C
chr12:g.43550991G>A
chr4:g.172229709G>C
chr5:g.40841465C>T
chr20:g.50610859G>A
chr17:g.69523536C>T
chr5:g.52800832C>T
chr15:g.68945897C>G
chr16:g.81939914C>G
chr5:g.149896719C>T
chr4:g.99608946C>G
chr14:g.105600309C>G
chr6:g.26158241G>A
chr2:g.96761468G>A
chr7:g.70790934C>T
chr12:g.25245351C>A
chr11:g.68980824G>A
chr19:g.47069098C>T
chr11:g.121125839C>A
chr9:g.21971037C>A
chr1:g.144427921T>C
chr1:g.155264729C>G
chr13:g.73061952C>T
chr22:g.20427488C>G
chr16:g.24572061G>C
chr20:g.47684560C>T
chr21:g.42121092G>A
chr12:g.99154389C>T
chr17:g.41395269G>A
chr18:g.7044770G>A
chr2:g.169162565C>T
chr5:g.137887257C>T
chr3:g.183195235C>G
chr19:g.10682606G>A
chr1:g.109543417C>T
chr7:g.135645565G>A
chr5:g.141151234C>T
chr16:g.3738650C>G
chr17:g.31296180G>A
chr19:g.49409219G>C
chr5:g.124701216G>A
chr1:g.39484676G>A
chr9:g.21971112G>A
chr7:g.44764448C>T
chr1:g.44008435G>A
chr17:g.43545340C>T
chr17:g.58696787G>A
chr16:g.10902760C>G
chr5:g.79619697C>T
chr6:g.32053706C>T
chr16:g.67257350G>C
chr6:g.121112614G>A
chr22:g.19852217G>C
chr12:g.55748967C>T
chr3:g.186717504G>A
chr1:g.26773884C>T
chr12:g.49188991C>T
chr7:g.94427726C>T
chr3:g.39187132C>T
chr6:g.54326864G>A
chr7:g.88132930G>A
chr14:g.61762538C>T
chr19:g.45037892C>T
chr17:g.39723405G>A
chr15:g.84839054G>A
chr1:g.109479621C>G
chr1:g.62263221C>T
chr6:g.38703004G>A
chr9:g.128261241C>T
chrX:g.135291027C>G
chr6:g.7229273C>T
chr11:g.14835047C>T
chr11:g.61009729G>A
chr19:g.51994793G>A
chr3:g.20040759C>T
chr1:g.150511463G>A
chr19:g.13214525C>G
chr17:g.4539347A>T
chr19:g.39505310G>C
chr2:g.165115458C>T
chr1:g.110223492G>A
chr1:g.239908277G>A
chr9:g.37429806G>C
chr1:g.23367988G>A
chr1:g.111350221G>A
chr11:g.119095162C>T
chr1:g.108192598G>C
chr3:g.100713731C>T
chr22:g.32084992C>T
chr8:g.12182802C>T
chr20:g.54643515C>T
chrX:g.130069405G>A
chr17:g.7674187T>A
chr2:g.178557468C>G
chr2:g.20447688C>T
chr2:g.218668253G>A
chr19:g.12379865G>A
chr18:g.3119942G>A
chr9:g.32632501G>A
chr1:g.161784013C>T
chr8:g.53229519A>G
chr3:g.41224622C>G
chr4:g.9783229C>T
chr20:g.62881731C>T
chr11:g.721618G>A
chr2:g.197494722C>G
chr5:g.140786989C>T
chr16:g.23689643C>T
chr1:g.67425128G>C
chr19:g.57504675G>C
chr14:g.46841939G>C
chr19:g.32976595G>C
chr1:g.203773993C>T
chr6:g.83139125C>T
chr19:g.58053749G>A
chr4:g.40750897C>G
chrX:g.96916544C>T
chr1:g.26732722C>G
chr3:g.49123263G>A
chr1:g.153986114G>A
chr12:g.56110670G>A
chr18:g.78994241C>T
chr7:g.92833129C>T
chr3:g.48571132G>A
chr2:g.89010439C>T
chr5:g.140788475G>A
chr17:g.65014792C>G
chr16:g.14929386C>T
chr5:g.134781972C>G
chr17:g.39724747G>T
chr1:g.204443591C>T
chr2:g.218740161_218740162insTCACAGTT
chr19:g.37413565G>T
chr21:g.30502052G>A
chr2:g.73088400C>G
chr7:g.57120479G>A
chrX:g.14020187C>G
chr17:g.7674890T>C
chr2:g.79086530C>T
chr7:g.20785653G>A
chr1:g.201002320C>T
chr1:g.17695146C>G
chr3:g.120167670G>A
chr10:g.73792577G>A
chr16:g.16114968C>T
chr2:g.113075164G>A
chr5:g.143300760C>T
chr17:g.81294877G>C
chr8:g.54625911C>T
chr12:g.47078850G>A
chr17:g.47680650_47680651insGCTCCT
chr1:g.26767895G>T
chr20:g.33611264C>G
chr1:g.36450255C>T
chr16:g.53687945C>G
chr16:g.27235211G>A
chr1:g.15727448C>T
chr2:g.240891760G>A
chr15:g.40335358C>T
chr19:g.17227099G>A
chr2:g.32607522G>T
chr11:g.89491220G>A
chr8:g.143726121C>T
chr11:g.129376128C>G
chr17:g.29969314G>A
chr12:g.53213535C>T
chrX:g.147213461C>G
chr17:g.75266820C>G
chr5:g.168579295G>A
chr1:g.23193016A>T
chr6:g.36684280_36684281insG
chr1:g.26779439_26779440insG
chr1:g.1487900C>T
chr4:g.1353258C>T
chr1:g.107324862T>C
chr19:g.19544025C>G
chr1:g.169387004G>C
chr17:g.7674250C>A
chr15:g.22559859C>T
chr6:g.18159922G>C
chr6:g.34856858C>T
chr17:g.44773278C>G
chr19:g.7935130C>G
chr5:g.5239850C>T
chr1:g.145876196G>C
chr16:g.67936229G>A
chr8:g.143728707C>G
chr6:g.44260069C>T
chr5:g.141152030C>T
chr19:g.48613159C>T
chr19:g.8938146G>C
chr10:g.34517033G>A
chr9:g.66990479C>G
chr7:g.74121042G>A
chr19:g.15678258C>G
chr12:g.109265119G>C
chr20:g.23876159G>A
chr1:g.23794633C>T
chr3:g.143972678C>T
chr19:g.58499192C>T
chr22:g.31792772C>G
chr19:g.49972085C>T
chr7:g.128731174C>T
chr16:g.658562C>T
chr1:g.155016229G>T
chr5:g.160406593C>T
chr19:g.45368734C>G
chr2:g.119967939G>A
chr12:g.117225057C>T
chrX:g.45089742G>A
chr12:g.109067553G>A
chr10:g.62655393G>A
chr12:g.56088557G>T
chr13:g.48476728C>T
chr18:g.76379125G>C
chr19:g.12670078G>C
chr11:g.108940385G>A
chr13:g.99501702G>A
chr19:g.18200356G>A
chr8:g.30846989C>T
chr19:g.1095361G>C
chr4:g.183510584G>A
chr19:g.38082496G>A
chr1:g.182585840G>A
chr1:g.26732773C>G
chr12:g.119179562G>A
chr8:g.120203838C>G
chr17:g.17796971C>G
chr12:g.130363053G>A
chr1:g.169727787C>G
chr17:g.79047827C>T
chr10:g.95422005C>G
chr11:g.65503987G>C
chr1:g.3707604C>T
chr6:g.36684167delC
chr19:g.17365503G>A
chr11:g.10534137G>C
chr20:g.35147250G>A
chr13:g.48373493G>A
chr6:g.133481500C>G
chr1:g.87340060C>T
chr9:g.127264931G>A
chr16:g.765688C>G
chr7:g.157568951C>G
chr12:g.68764925G>A
chr1:g.38875839G>A
chr13:g.48473371C>A
chr6:g.138785244G>A
chr1:g.19780722G>C
chr19:g.3819088C>T
chr17:g.81890691G>A
chr3:g.52522394C>T
chr19:g.18573292G>A
chr4:g.173333593G>A
chr22:g.38520070C>T
chr1:g.26771174C>G
chr1:g.36091822G>A
chr7:g.64979284G>A
chr3:g.138946507C>T
chr17:g.30840704G>A
chr17:g.18016245G>A
chr3:g.57169229C>T
chr9:g.132911500G>A
chr15:g.25073195G>A
chr22:g.50744104C>T
chr1:g.65408680C>G
chr12:g.56098839G>C
chrX:g.30855033C>G
chr10:g.126998095C>G
chr7:g.2938826C>T
chr6:g.43070689C>G
chr9:g.132336344G>C
chr5:g.157109087A>T
chr16:g.24220079C>G
chr9:g.134436505C>A
chr1:g.52771593G>C
chr17:g.7674193A>T
chr9:g.21971200C>A
chr5:g.156954542C>T
chr17:g.39471317G>C
chr7:g.149104346G>C
chr9:g.91723874C>T
chr22:g.37655596G>A
chr1:g.213997021G>A
chr18:g.23928669C>T
chr16:g.77825265C>T
chr11:g.76544793G>A
chr2:g.218814633G>C
chr3:g.186652491G>A
chr9:g.125189784G>A
chr1:g.159873071C>T
chr15:g.40815741G>A
chr10:g.114044880G>A
chr12:g.55940959G>C
chr9:g.136946097G>A
chr6:g.106105021G>A
chr7:g.20659076G>A
chr15:g.83107724C>G
chr1:g.228245560C>G
chr5:g.141393376G>C
chr17:g.7673803G>T
chr12:g.6944154G>A
chrX:g.45010959A>T
chr7:g.151001310delG
chr16:g.89722812G>A
chr14:g.49779755G>C
chr7:g.16465693G>A
chr20:g.34749480C>A
chr2:g.135313567C>T
chr2:g.202941888G>A
chr5:g.95498589G>C
chr15:g.74132767C>T
chr13:g.113208157C>T
chr17:g.76736088C>G
chr11:g.108321338G>C
chr17:g.37155727G>A
chr6:g.53652199G>A
chr17:g.31320457G>C
chr6:g.73242532_73242533insTCATCA
chr11:g.1622049C>T
chr12:g.32708200delAG
chr1:g.145994323C>G
chr2:g.29070781C>T
chr13:g.75537609C>T
chr3:g.49360277C>T
chr19:g.8858608C>G
chr1:g.31059311G>A
chr5:g.172346241C>T
chr9:g.71704606G>C
chr9:g.121144899C>T
chr16:g.88803891C>T
chr10:g.125836710C>T
chr9:g.127479482G>A
chr5:g.67163775G>A
chr12:g.113299876G>A
chr2:g.186590491C>T
chr2:g.25756066C>T
chr3:g.142694497G>A
chr12:g.109852639G>C
chr11:g.76351805C>G
chr19:g.39891863G>A
chr1:g.46189982C>T
chr1:g.202011956G>A
chr13:g.73075764G>A
chr1:g.33700645C>T
chr19:g.45071526G>A
chr7:g.73831689C>T
chr5:g.1208819C>T
chr2:g.233556958G>C
chr3:g.45035793G>A
chr2:g.102526307C>T
chr1:g.149886616G>C
chr1:g.10304038C>G
chr17:g.81914503C>T
chr3:g.47101474G>A
chr15:g.25340117C>T
chr10:g.73068933C>G
chr12:g.1831283C>T
chr5:g.7861160G>C
chr14:g.77027622C>T
chr15:g.42402791C>G
chr10:g.102424733G>A
chr18:g.53339838G>A
chr8:g.143869315C>G
chr17:g.8173550C>T
chr4:g.102802573G>C
chr20:g.3121389G>A
chr19:g.14564946C>T
chr17:g.44960269G>C
chr2:g.86442117G>A
chr3:g.127639370G>A
chrX:g.124045347C>T
chr6:g.46689629G>C
chr11:g.65501413G>A
chr4:g.154269969G>A
chr1:g.15060234G>A
chr7:g.100097632G>A
chr14:g.19876507G>C
chr20:g.5100905C>T
chr3:g.64568420C>T
chr2:g.169083438C>T
chr6:g.7584918C>T
chr7:g.6692627G>A
chr14:g.34713372C>G
chr6:g.40432690C>T
chr9:g.128984912G>A
chr1:g.155320675C>G
chr1:g.3402925G>C
chr7:g.98931414G>A
chr2:g.43225059C>T
chr1:g.226367590C>T
chr4:g.9368765C>A
chr22:g.21925644C>T
chr6:g.56618540C>G
chr2:g.26483632C>T
chr22:g.29561509G>C
chr11:g.28077109C>T
chr15:g.43330246G>A
chr3:g.121698122C>T
chr11:g.85734006G>C
chr9:g.91724028G>A
chr16:g.9763418G>A
chr19:g.2514988G>A
chr11:g.68715857C>T
chr18:g.9134254G>C
chr1:g.38045681C>T
chr9:g.127787600G>A
chr19:g.16417970G>A
chr17:g.35442057G>C
chr8:g.100258633C>T
chr1:g.3815450C>T
chr14:g.105841112C>T
chr14:g.102944255C>A
chr17:g.17794441C>G
chr1:g.147624474C>T
chr19:g.54576051C>G
chr3:g.127575229G>A
chr17:g.39724004C>G
chr19:g.46230464G>A
chr1:g.237456614C>T
chr15:g.76935675G>C
chr17:g.7675994C>A
chr7:g.91265495C>T
chr10:g.35553173C>T
chr13:g.87675940C>G
chr9:g.137175105G>A
chr19:g.45407109C>T
chr2:g.202287678G>T
chr3:g.41224610C>T
chr13:g.77233222C>G
chrX:g.2740796G>C
chr19:g.45671289C>T
chr12:g.14481041C>T
chr11:g.17392915G>C
chr16:g.57659593C>G
chr7:g.134661917delACA
chr17:g.58006526C>G
chr4:g.150249678C>T
chr1:g.39455040T>G
chr11:g.65111641C>A
chr14:g.39175330G>C
chr4:g.73998058G>C
chr17:g.82035921G>T
chr2:g.86489369A>G
chr7:g.152002746G>A
chr5:g.7835466A>G
chr2:g.74369095G>A
chr7:g.103322782C>T
chr18:g.21741697C>G
chr1:g.161626220C>T
chr5:g.140830374G>A
chr17:g.4938041C>T
chr9:g.137192086C>T
chr2:g.108907946C>T
chr10:g.35607884G>A
chr12:g.4599731G>T
chr13:g.52029107_52029108insCAAGGGGTA
chr19:g.17835149C>G
chr7:g.100855719C>A
chr16:g.70809903C>T
chr11:g.109423849C>T
chr11:g.125429041G>T
chr3:g.48604655C>T
chr15:g.31501712C>G
chr1:g.26760973C>A
chr4:g.86107472C>T
chr18:g.51067149G>A
chr11:g.62825326G>C
chr22:g.43425048C>T
chr1:g.26794796C>T
chr12:g.57613716G>C
chrX:g.47223693G>A
chr5:g.111092305G>T
chr9:g.130893528G>A
chr7:g.124764528T>C
chr12:g.21906163A>G
chr1:g.241885424G>A
chr5:g.109355965G>C
chr6:g.44377140C>T
chr10:g.112430827C>T
chr17:g.5183795T>G
chr14:g.23415231T>C
chr19:g.35723255A>T
chr11:g.111723721C>G
chr4:g.113365184T>G
chr11:g.89047408G>T
chr1:g.156583338G>A
chr5:g.177135541C>T
chr17:g.35174337C>G
chr1:g.179393999A>T
chr17:g.48059572C>T
chr15:g.23644800G>C
chr1:g.88983807G>C
chr3:g.15434454C>T
chr18:g.7038845C>T
chr8:g.98706563T>A
chr2:g.215384123G>A
chr14:g.92797954G>T
chr12:g.52768863A>T
chr19:g.50661988G>A
chr3:g.153502583A>C
chr16:g.9764111C>T
chr17:g.30462467C>G
chr6:g.44265536C>T
chr22:g.43046523G>C
chr14:g.68789994C>T
chr16:g.67831248C>T
chr9:g.81685709C>A
chrX:g.55007153G>A
chr8:g.25421669C>G
chr2:g.202532699G>C
chr3:g.184308880A>G
chr12:g.52488420C>T
chr2:g.71133131C>T
chr6:g.99956058A>T
chr6:g.109481309C>G
chr11:g.65720731C>T
chr17:g.7309789G>A
chr6:g.7303616C>T
chr13:g.37029811T>C
chr14:g.80792762G>A
chr7:g.36287773G>A
chr1:g.159856037G>C
chr19:g.43652280G>C
chr10:g.119835653C>G
chr18:g.672950G>A
chr16:g.30510403G>A
chr17:g.7733233G>A
chr22:g.50768777C>G
chr1:g.167966717G>A
chr20:g.63790386G>A
chr15:g.56093742G>C
chr7:g.134960232_134960233insC
chrX:g.48212808G>A
chr1:g.237627938C>A
chr12:g.22673546G>A
chr5:g.178213079C>G
chr1:g.39293557G>A
chr13:g.49528564G>C
chr16:g.3254195C>T
chrX:g.1466340G>A
chr19:g.31276575A>G
chr12:g.26914058_26914059insT
chr3:g.9946313G>A
chr6:g.167826553C>T
chrX:g.154349514A>G
chr19:g.48991433C>T
chr11:g.49576894G>A
chr17:g.7583910delTC
chr6:g.30986860G>A
chr11:g.534285C>A
chr21:g.46213780G>A
chr14:g.74670088C>G
chr2:g.28850087A>G
chr3:g.8733820C>T
chr2:g.219502002C>T
chr7:g.122414075C>T
chr14:g.96317798G>C
chr12:g.68648732A>G
chr2:g.96848438C>T
chr17:g.82201674C>T
chr2:g.203394799G>C
chr9:g.111541786G>A
chr1:g.156671082C>T
chr5:g.141339329G>C
chr1:g.13225347G>A
chr9:g.83972909G>C
chr16:g.3728369C>T
chr6:g.37652292C>T
chr8:g.63073032T>C
chr12:g.49992024G>A
chr17:g.39471433C>T
chr17:g.8492791C>T
chr1:g.156677261C>G
chr13:g.71440584G>A
chr2:g.218673903G>A
chrY:g.21395956T>A
chr17:g.45118918C>T
chr12:g.64439305A>G
chr7:g.51030827C>T
chr12:g.71566881G>C
chr15:g.43456566C>G
chr10:g.20164467G>C
chr3:g.58148314C>T
chr11:g.67301060G>A
chr1:g.241999015C>T
chrX:g.17149071G>A
chr10:g.7775773G>A
chr12:g.42355198C>G
chr2:g.132785354G>A
chr8:g.52645853G>A
chr17:g.59587939C>G
chr11:g.94498478T>C
chr18:g.45669347G>A
chr15:g.60448113C>G
chr5:g.128537614G>T
chr6:g.76022152G>A
chr6:g.109450384C>G
chr5:g.32090081T>C
chr1:g.35507000G>C
chr5:g.69419472A>G
chr10:g.71615604C>G
chr6:g.33006757G>C
chr20:g.62911399C>T
chr1:g.150286931G>A
chr1:g.219997308G>A
chr13:g.24906100C>G
chr14:g.99175099C>T
chr22:g.40681743T>C
chrX:g.47232959C>T
chr10:g.50211132T>G
chr11:g.72216817C>T
chr6:g.146029672C>T
chr4:g.72147105G>T
chr6:g.73788503C>G
chr1:g.27549382G>A
chr10:g.35029629A>C
chr12:g.52491138C>T
chr17:g.75840560G>A
chr3:g.197024378C>T
chr15:g.58894477G>C
chr16:g.81044548C>T
chr1:g.67093328C>G
chr13:g.113820759G>A
chr7:g.158902412G>A
chr16:g.1204341C>T
chr7:g.146774317C>A
chr6:g.63680076G>C
chr17:g.40861675C>T
chr3:g.184187955G>C
chr20:g.62412863G>A
chr12:g.103938403G>T
chr11:g.71458490T>C
chr17:g.75724754G>C
chr16:g.23532667C>T
chr4:g.182793561G>A
chr1:g.20851372G>C
chr4:g.13337627G>A
chr13:g.19049993G>A
chrX:g.152135366C>G
chr11:g.48264269C>T
chr8:g.103885774C>G
chr19:g.35715477G>A
chr19:g.42292142G>C
chr5:g.109690295C>T
chr11:g.68600438G>A
chr10:g.89611792G>A
chr12:g.18683208T>A
chr6:g.127476012G>A
chr11:g.2461644G>A
chr15:g.72346481C>T
chr19:g.42056818G>A
chr2:g.197460028C>T
chr8:g.24508553A>G
chr3:g.48465534C>G
chr14:g.47061325C>T
chr19:g.49022926C>A
chr16:g.14989418G>C
chr15:g.82681163C>A
chr19:g.54595250C>G
chr8:g.134602666C>T
chr2:g.127942115C>G
chr21:g.43107530T>C
chr3:g.53099391C>T
chr3:g.184317391G>A
chr7:g.77382590C>T
chr1:g.35387575C>T
chr17:g.76072469delG
chr6:g.25811648delGAAGAGTTTCCGGACAGCAATTACGCTGAGAATATTCCTGGTCAG
chr17:g.45437859C>T
chr5:g.138391214C>A
chr7:g.44041105C>T
chrX:g.119852989C>T
chr21:g.45455608G>C
chr12:g.7487386C>T
chr11:g.9832242G>A
chr12:g.62383938G>C
chr6:g.124962832C>T
chr3:g.121647436C>T
chr17:g.16624187C>G
chr6:g.31271302G>A
chr8:g.85209188C>T
chr19:g.54818366G>C
chr2:g.224805079G>T
chr3:g.69062990G>T
chr19:g.20125083G>A
chr11:g.47178967C>T
chr15:g.55860524G>T
chr9:g.136484781delCTGTTTGAA
chr4:g.174977890C>T
chr9:g.74671796C>A
chr5:g.35697722A>C
chr19:g.42442830C>T
chrX:g.102657418C>T
chr10:g.27250824C>T
chr4:g.99279448C>G
chr19:g.41579453C>G
chr14:g.99721281C>A
chr7:g.118224827C>T
chr20:g.61852822C>T
chr2:g.178530549C>G
chr1:g.153747383_153747384insTAATTCA
chrX:g.124071154C>T
chr6:g.41799855G>C
chr19:g.4950897T>G
chr22:g.36526132C>G
chrX:g.16689599G>A
chr1:g.196672987A>C
chr11:g.77103146A>T
chr10:g.6430872G>A
chr10:g.29458448C>T
chr16:g.30521617G>T
chr19:g.18200367C>A
chr17:g.45508077G>A
chr5:g.43295796C>T
chr4:g.150590797G>C
chr11:g.68158691G>C
chr11:g.62995799C>T
chr4:g.143469179G>C
chr17:g.69123279C>G
chr4:g.69849533C>T
chr19:g.42405554C>G
chr5:g.228306G>C
chr3:g.98264498C>T
chr17:g.36166277G>A
chr4:g.68461849G>A
chr5:g.151281044A>G
chr9:g.19435041C>T
chr2:g.88027840C>G
chr9:g.86310017C>A
chr3:g.109007070C>T
chr17:g.67018213G>A
chrX:g.53565121C>T
chr1:g.53461552G>A
chr12:g.6588300G>C
chr12:g.68856426C>T
chr17:g.73285933G>A
chr2:g.79137129T>C
chr4:g.39849583C>G
chr1:g.64835476C>A
chr6:g.31627106G>A
chr1:g.42758915C>G
chr6:g.36324188C>A
chr4:g.113311376C>T
chr5:g.141394896G>A
chr7:g.101195843G>A
chr1:g.202012073C>G
chr3:g.9470904C>T
chr13:g.48256274T>G
chr17:g.75978566G>A
chr16:g.24790048C>T
chr14:g.56617206T>C
chr9:g.122990179G>A
chr9:g.65284127G>C
chr16:g.19669297C>A
chr17:g.19785972C>G
chr1:g.214483094G>A
chr15:g.64397714G>A
chr4:g.70768610G>C
chr19:g.56815713C>T
chr12:g.55961630C>T
chr11:g.122904414_122904415insA
chr17:g.56350850C>T
chr9:g.104132063C>T
chr22:g.38115622T>G
chr19:g.48303027C>T
chr19:g.53073499C>A
chr10:g.29532687C>A
chr11:g.64244086A>C
chr16:g.27533387C>T
chr1:g.151266391G>C
chr5:g.14608984G>C
chr3:g.101821467A>G
chr16:g.24569263A>G
chr12:g.45851421C>T
chr13:g.41193649G>A
chr3:g.10249597G>A
chr6:g.21230969C>T
chr2:g.38985703G>T
chr1:g.59833459G>A
chr18:g.32287497T>A
chr10:g.43200709G>A
chr5:g.176889679C>T
chr10:g.68967066G>T
chr11:g.47215100C>T
chr1:g.244856155T>A
chr20:g.23985754G>T
chr17:g.7415962G>A
chr4:g.71357065A>G
chr4:g.166043333G>A
chr11:g.6621945G>A
chr6:g.108664068C>G
chr9:g.74762061G>A
chr7:g.127598485G>A
chr19:g.14097851C>A
chr3:g.100304871C>A
chr1:g.157833434C>G
chr9:g.128268488C>T
chr10:g.20245424C>T
chr9:g.136516036C>G
chr7:g.115941000G>A
chr14:g.24974730T>A
chr17:g.63818266G>C
chr1:g.240093493G>A
chr19:g.2853588A>G
chr2:g.106843737G>C
chr21:g.18275300G>A
chr20:g.36768038G>C
chr17:g.75518992G>C
chr9:g.97309447A>C
chr12:g.29583424T>A
chr2:g.206004571C>T
chr4:g.53460792G>A
chr2:g.171785396A>T
chr1:g.173909828G>A
chr17:g.78117825G>C
chr10:g.62399533G>A
chr7:g.142864540A>T
chr8:g.1957101G>A
chr10:g.84208833G>T
chr1:g.173486327G>A
chr3:g.185716471C>T
chr12:g.55749547C>T
chr17:g.81844019T>C
chr1:g.119768845C>T
chr19:g.54217220G>A
chr15:g.30410351G>T
chr5:g.124641337G>T
chr1:g.206102026C>T
chrX:g.87518253T>C
chr20:g.34412619T>G
chr11:g.1247791C>T
chr22:g.41343453G>A
chr2:g.21016645C>T
chr4:g.188098970T>A
chr1:g.89060316G>T
chr11:g.65242011G>A
chr3:g.45110776G>A
chr2:g.56372375G>C
chr4:g.169009952G>A
chr9:g.127455579C>G
chr9:g.72149506C>G
chr3:g.147410447C>T
chr4:g.54657953C>T
chr3:g.167697123C>G
chr10:g.103419594G>T
chr1:g.46035643G>C
chr14:g.60714121G>A
chr9:g.713382delTA
chr10:g.68885130G>T
chrX:g.11143886G>A
chr9:g.111727679C>A
chr16:g.48104345G>A
chr1:g.226152514C>T
chr16:g.72060909C>T
chr2:g.178738313C>T
chr19:g.41354765C>T
chr9:g.39359656C>G
chr11:g.89798521G>T
chr3:g.133588119G>C
chr12:g.49033808C>A
chr1:g.93576046G>C
chr14:g.56633049G>T
chr4:g.41263285G>A
chr3:g.169095225G>A
chr7:g.66797472G>A
chr16:g.3090352C>T
chr19:g.36719480A>C
chr11:g.61134084C>G
chr21:g.10414882G>T
chr17:g.75757554G>A
chr17:g.44374340C>T
chr1:g.97306220T>G
chr6:g.142760587C>T
chr3:g.113013289G>A
chr1:g.248145948C>T
chr15:g.57625791C>T
chr12:g.39309646G>C
chr2:g.203138634G>C
chr1:g.110952576G>A
chr2:g.167245937A>C
chr3:g.52634687C>T
chr22:g.24324382C>T
chr12:g.41191511G>A
chr8:g.109490999C>T
chr20:g.37141167C>T
chr2:g.89143138C>A
chr10:g.63207542G>A
chr2:g.121457690C>G
chr2:g.54629594G>T
chr14:g.81192562T>C
chr18:g.50276998C>T
chr11:g.61813312C>T
chr1:g.34758124G>C
chr2:g.121460112C>G
chrX:g.45083483T>C
chr2:g.121448989G>C
chr3:g.55888453C>T
chr11:g.95862316G>A
chr2:g.197416853T>C
chr14:g.32822179G>A
chr15:g.75649430G>C
chr6:g.32117934C>A
chr17:g.10453722G>A
chr2:g.36356472C>T
chr17:g.7675130G>A
chr15:g.52196464C>T
chr12:g.106999746G>T
chr19:g.50819159T>C
chr1:g.36467235C>T
chr22:g.42213611C>T
chr7:g.151076338G>A
chr17:g.74440769G>A
chr13:g.95757689C>T
chr9:g.37955962G>C
chr19:g.52765580C>T
chr6:g.36470254G>A
chr5:g.140877578C>A
chr3:g.124694390G>A
chr2:g.25753595C>G
chr1:g.178439573G>A
chr2:g.118108354G>C
chr3:g.15470576T>A
chr3:g.122109295A>G
chr3:g.183985465G>A
chr5:g.83539946G>A
chr7:g.103697981A>G
chr19:g.18598573C>T
chr7:g.103195592C>G
chr6:g.152381225C>T
chr3:g.147410875C>A
chr3:g.42914557G>C
chr7:g.103119675_103119676insA
chr11:g.65871245G>A
chr6:g.142772636C>G
chr11:g.56490738G>A
chr4:g.72305996G>T
chr8:g.124589693C>G
chr2:g.60461157G>A
chr17:g.63355129C>T
chr12:g.93411269G>A
chr5:g.112839427C>T
chr17:g.41440777C>T
chr15:g.40853892G>A
chr6:g.89938158C>T
chr6:g.160069953G>C
chr1:g.214637903C>G
chr3:g.75741794C>G
chr3:g.151394837C>T
chr17:g.48997684C>T
chr1:g.149971081G>A
chr8:g.72937521T>C
chr8:g.100287784C>T
chr5:g.140705755G>A
chr4:g.185407968C>T
chr13:g.32340038G>A
chr1:g.236178599C>T
chr19:g.17720941C>T
chr6:g.34887810C>T
chr2:g.189010178G>C
chr2:g.112738921G>A
chr17:g.30899270delTC
chr12:g.6941430C>G
chr3:g.121539543delCTGCCCA
chr13:g.52461561A>G
chr12:g.64694794delATTTCTTGCG
chr12:g.98547910G>C
chr3:g.196508313C>A
chr12:g.102153930C>G
chr7:g.101173398C>T
chr7:g.150720863C>G
chr13:g.87677141G>A
chrX:g.153981955G>A
chr11:g.103177743A>T
chr12:g.11890979_11890980insA
chr21:g.44579983C>A
chr2:g.94853277A>G
chr5:g.177604539C>T
chr16:g.2528323G>C
chr1:g.114625276_114625277insT
chr5:g.141485761delG
chr3:g.179583443C>T
chr7:g.151040534G>C
chr6:g.31202629G>C
chr20:g.46070236C>T
chr5:g.79729374G>A
chr10:g.11931707C>T
chr1:g.51790977C>T
chr22:g.19972826G>A
chr3:g.158645657C>T
chr9:g.35752114C>T
chr20:g.41204364G>C
chr9:g.34993320G>A
chr2:g.156325927G>A
chr2:g.44321415C>G
chr6:g.27838828C>T
chr2:g.167243646C>G
chr19:g.38304253C>G
chr3:g.195757200C>G
chr1:g.154246208G>A
chr9:g.131939446C>T
chr1:g.161040830C>A
chr3:g.10338234C>T
chr17:g.50862881delC
chr2:g.102508919G>C
chr13:g.113355464T>C
chr6:g.136181289G>C
chr1:g.248362061C>A
chr9:g.131192289C>T
chr12:g.49051387C>T
chr5:g.139051005G>A
chr6:g.26250595G>C
chr2:g.71350268G>A
chr2:g.27493471G>A
chr1:g.150648484G>C
chr5:g.96398975C>G
chr17:g.66877418G>C
chr3:g.49284063C>G
chr2:g.33134868G>C
chr12:g.122508259C>G
chr3:g.96987845T>C
chr19:g.57158357C>T
chr20:g.63862283T>C
chr22:g.36496207T>G
chr18:g.45879058C>T
chr3:g.49211805A>T
chr13:g.18840002T>C
chr6:g.44254598G>A
chr22:g.23884781A>G
chr19:g.46312326C>T
chr3:g.49718466C>T
chr19:g.50379830C>G
chr1:g.161791481C>T
chrX:g.48808298A>G
chr14:g.21724188C>T
chr7:g.45102472G>A
chr19:g.42593541G>A
chr3:g.35681758G>C
chr8:g.76706097C>T
chr5:g.181154946G>C
chr16:g.51137182C>T
chr16:g.87644775C>T
chr11:g.120986176G>A
chr8:g.42472381C>G
chr1:g.62841536G>A
chr22:g.22358130G>A
chr8:g.141441230C>T
chr20:g.31406140G>T
chr8:g.19954129C>T
chr14:g.74358399C>T
chr4:g.183319529G>A
chr9:g.28863670A>T
chr8:g.41694762G>A
chr5:g.140875551G>T
chr7:g.36423930delACTACATTTACTCTGTAAGTAAATCAGGCTTTTGATGATTCGA
chr12:g.113108202G>A
chr10:g.4999234A>G
chr8:g.60781183A>G
chr4:g.108742349C>T
chr10:g.94546469C>G
chr10:g.1103706C>T
chr11:g.47243050G>C
chr11:g.57335065C>T
[truncated: 8,000 more rows]

## Sheet: BRCA
chr3:g.179234297A>G
chr3:g.179218303G>A
chr3:g.179218294G>A
chr1:g.76576946_76576947insAAAC
chr14:g.104780214C>T
chr10:g.8069470delCA
chr3:g.195783009C>T
chr3:g.195783008A>G
chr17:g.7675088C>T
chr3:g.179203765T>A
chr15:g.20535018C>T
chr3:g.179234297A>T
chr6:g.154107953delTTTTTA
chr17:g.7673802C>T
chr16:g.15104542T>A
chr1:g.146963189G>C
chr3:g.195778903G>T
chr3:g.195781031_195781032insACCGGTGGATGCCGAGGAAGCGTCGGTGACAGGAAGAGGGGTGGTGTCACCTGTGGATACTGAGGAAAAGCTGGTGACAGGAAGAGGGGTGGCGTGACCTGTGGATACTGAGGAAGTGTCGGTGACAGGAAGAGTCGTGGTGTC
chr2:g.197402110T>C
chr3:g.195780140G>A
chr6:g.26217357A>T
chr3:g.179221146G>A
chr15:g.22465692G>A
chr16:g.68738315C>T
chr11:g.1097377T>C
chrX:g.107603209C>G
chr10:g.8069550_8069551insG
chr17:g.7674945G>A
chr11:g.1097397C>T
chr1:g.24672566G>A
chr15:g.20534646C>T
chr3:g.195782416T>G
chr16:g.29485611C>G
chr17:g.7670685G>A
chr6:g.73519043A>G
chr3:g.179210291G>A
chr17:g.7674872T>C
chr11:g.1097336G>A
chr11:g.1097423A>C
chr22:g.18535866A>G
chr17:g.7674894G>A
chr16:g.70186543G>C
chr3:g.195779688A>G
chr11:g.1097430C>A
chr17:g.7674953T>C
chr1:g.148536242A>T
chr14:g.18974884_18974885insTTTTTA
chr11:g.1097346C>A
chr11:g.1097434C>T
chr3:g.179218307A>G
chr10:g.47461391G>A
chr3:g.195780864G>T
chr17:g.7675076T>C
chr10:g.8073911_8073912insG
chr15:g.20534396A>C
chr3:g.195780075T>G
chr11:g.1097399C>T
chr6:g.34022043T>C
chr3:g.179210192T>C
chr15:g.22465652G>A
chr3:g.195780891T>G
chr3:g.195782159T>C
chr3:g.179218304A>C
chr3:g.195782300G>A
chr17:g.7674221G>A
chrX:g.65506953delCTCT
chr22:g.21183986C>T
chr17:g.7673803G>A
chr1:g.144436988C>A
chr15:g.82434266G>A
chr17:g.7675085C>A
chr17:g.39723967T>C
chr7:g.72942166C>T
chr1:g.170998644A>T
chr10:g.45827364T>G
chr1:g.148533964C>T
chr11:g.1097380G>A
chr3:g.179199690G>A
chr15:g.41464812delAA
chr17:g.7674947A>G
chr7:g.73325571A>G
chr11:g.1097335C>T
chr4:g.2514476A>C
chr3:g.112362713_112362714insTATATA
chr19:g.8981324G>T
chr6:g.87589942G>A
chr17:g.7673767C>T
chr10:g.46131074C>T
chr3:g.32526063delATAT
chr17:g.18151242delC
chr16:g.29527601A>G
chr2:g.173954943delTGTT
chr17:g.20504351C>T
chr11:g.1097352C>G
chr17:g.7673776G>A
chr11:g.1097298G>C
chr3:g.195782165C>G
chr16:g.68801693C>T
chr7:g.106251003A>G
chr16:g.46703892T>A
chr17:g.18427271A>G
chr10:g.87933148G>A
chr19:g.53876262delATATAT
chr16:g.30065810C>T
chr21:g.34880697_34880698insC
chr12:g.16810G>A
chr3:g.195780082G>A
chr10:g.8064095T>A
chr3:g.195782714C>T
chr7:g.45084098C>T
chr3:g.179218306C>A
chr9:g.39371290C>T
chr3:g.195782627C>T
chr16:g.22491887A>T
chr17:g.7674240delG
chr1:g.144427921T>C
chr17:g.7674904delTC
chr10:g.79514306C>T
chr12:g.16040G>A
chr17:g.7674950A>C
chr1:g.248858458T>G
chr16:g.70174348G>A
chr12:g.51246272delA
chr2:g.164492885G>A
chrX:g.132077650T>A
chr11:g.1097404C>T
chr4:g.117085071C>A
chr3:g.195782483C>T
chr16:g.68810236G>A
chr17:g.76292884C>T
chr16:g.46703891delGTGC
chr13:g.99965022delTATATA
chr10:g.45826548G>A
chr15:g.82345046G>A
chr10:g.79513976C>T
chr7:g.107929783G>C
chr16:g.56748287G>A
chr7:g.106250901G>A
chr10:g.47461444G>C
chr1:g.109910737delGTGT
chr15:g.20535186C>T
chr2:g.130680549T>G
chr3:g.195786606G>A
chr11:g.1097253C>A
chr8:g.7015892A>G
chr5:g.68295276delTTAAACCAGACC
chr10:g.47461664C>T
chr3:g.177051507_177051508insTA
chr12:g.25245350C>A
chr8:g.18223133delAAA
chr17:g.58357800delC
chr9:g.39371280G>C
chr10:g.47491611C>A
chr14:g.18988312C>A
chr3:g.195788206T>C
chr15:g.20535161T>C
chr10:g.46759180G>A
chr17:g.7675190C>T
chr17:g.16830573A>G
chr8:g.38150849T>G
chr17:g.7674229C>T
chr6:g.30986757T>A
chr3:g.195781028_195781029insGTGACCGGTGGATGCCGAGGAAGCGTCGGTGACAGGAAGAGGGGTGGTGTCACCTGTGGATACTGAGGAAAAGCTGGTGACAGGAAGAGGGGTGGCGTGACCTGTGGATACTGAGGAAGTGTCGGTGACAGGAAGAGTCGTGGT
chr1:g.10352639C>T
chr17:g.18151240A>T
chr15:g.33662609G>A
chr16:g.23062383A>T
chr5:g.78039083delT
chr15:g.82524070G>A
chr2:g.11182970_11182971insTG
chr15:g.101764200C>A
chr12:g.56098849A>G
chr1:g.22092277A>G
chr14:g.37592256G>C
chr17:g.7674220C>T
chr17:g.7674885C>T
chr2:g.113578161G>A
chr8:g.52111949delTGTG
chrX:g.81116291G>T
chr20:g.3786475delGGGGCCCATCCCGGCGCGCCCCCCGCCCCGGGGCCCGGCGCCGCCGCCGCCGCCCCGGGGCGG
chr17:g.7674292T>C
chr12:g.6235559C>G
chr15:g.82345003C>G
chr17:g.18440196T>G
chr14:g.24338666A>G
chr3:g.195782682A>G
chr2:g.111785382G>T
chr20:g.63920087G>A
chr12:g.50222686delC
chr15:g.82345024C>T
chr7:g.133253163C>T
chr2:g.147926117delA
chr7:g.75148882T>C
chr7:g.44040806A>G
chr17:g.16126142_16126143insT
chr8:g.12400325T>G
chr10:g.46342939A>G
chr1:g.146986469A>C
chr17:g.7673537G>A
chr5:g.141389874G>A
chr17:g.39724747G>T
chr15:g.82436020G>C
chr8:g.93809963C>T
chr3:g.195778910G>A
chr2:g.233511819T>G
chr3:g.69038998G>A
chr1:g.165501553C>A
chr3:g.179210272delGCCAGTACCTCATGGATTAGAAGATTT
chr7:g.77779444delATAT
chr1:g.151288603delC
chr14:g.37592035G>A
chr17:g.7673802C>A
chr8:g.38381952T>C
chr17:g.36439560G>A
chr2:g.98397126C>T
chr12:g.57212526G>A
chr10:g.48050295T>C
chr8:g.109459614_109459615insA
chr1:g.15747598C>T
chr1:g.175160797T>C
chr17:g.42572810A>G
chr17:g.12107827C>T
chr5:g.56882342C>T
chr10:g.8073910_8073911insC
chr4:g.88408571G>A
chr9:g.21367457C>T
chr3:g.179234176G>C
chr8:g.21909248A>G
chr8:g.41539749G>A
chr8:g.122951671C>G
chr1:g.177939725G>A
chr10:g.47995404C>T
chr9:g.90613611G>A
chr7:g.14841226G>A
chr19:g.1430255delC
chr1:g.220796773C>G
chr18:g.50664256G>A
chr2:g.174847038_174847039insTAATATTGTTT
chr11:g.85661961delTATA
chr1:g.247257141A>T
chr1:g.57015131G>C
chr14:g.71709327G>A
chr6:g.26107621G>A
chr3:g.156809723G>A
chr6:g.90536530_90536531insCAT
chr8:g.120196931G>C
chr1:g.168242715G>A
chr5:g.68301440G>A
chr1:g.206437992C>T
chr1:g.247532027G>A
chr13:g.49359824delT
chr10:g.62399754delA
chr7:g.89327409_89327410insA
chr6:g.12120240G>A
chr11:g.70111753A>G
chr1:g.151694017G>T
chr4:g.99948895G>A
chrX:g.100675929T>C
chr17:g.7676031A>C
chr11:g.55812023G>T
chr11:g.130233983T>G
chr8:g.97888164G>A
chr11:g.102205927G>A
chr12:g.70538470T>C
chr3:g.179234302G>C
chr1:g.237511755G>A
chr17:g.44773382G>A
chr2:g.61492337C>T
chr4:g.9368657C>T
chrX:g.137030394G>A
chr18:g.68846317C>T
chr17:g.7675994C>G
chr5:g.83077318T>C
chr12:g.111485772G>A
chr4:g.48515119C>T
chr4:g.75645357delA
chr1:g.85158732delA
chr16:g.29485438C>G
chr17:g.7674230C>T
chr11:g.103062221delA
chr1:g.214605805C>T
chr3:g.33094001G>A
chr17:g.60073263A>G
chr22:g.24728036G>A
chr8:g.68053241G>A
chr19:g.53679964G>A
chr19:g.47801741C>G
chr5:g.69114488G>A
chr7:g.93276366C>T
chr4:g.44636000_44636001insA
chr4:g.145137362delT
chr12:g.56088823C>T
chr6:g.55513840T>A
chr12:g.6121294G>A
chr2:g.102505332delC
chr10:g.29550659C>A
chr7:g.158192471G>A
chr5:g.149914962C>G
chr7:g.149811982C>T
chr2:g.27894617G>A
chr3:g.155775761C>G
chr8:g.11422379T>G
chr1:g.85190596_85190597insTTTTT
chr1:g.110963627G>A
chr3:g.179234296C>T
chr3:g.151368166C>T
chr1:g.160093933G>C
chr2:g.33257445delA
chr5:g.160474443C>A
chr9:g.70131573G>A
chr12:g.51807445C>T
chr7:g.55143404G>A
chr7:g.128652946C>T
chr10:g.829719G>A
chr3:g.187076989A>T
chr6:g.145927323_145927324insTTCACATG
chrX:g.48902787C>T
chr19:g.15256100delT
chr2:g.162214039C>T
chr16:g.3249561C>T
chr10:g.99877281G>T
chr6:g.44403972C>G
chr1:g.40236860C>T
chr16:g.30398054G>A
chr13:g.49188531G>A
chr19:g.54107057G>C
chr22:g.21183850A>T
chr20:g.62966833C>T
chr17:g.40799633C>A
chr5:g.79131120C>T
chr14:g.60471555G>A
chr22:g.22643258G>A
chr17:g.74370558C>T
chr1:g.89715020A>G
chr1:g.152156543C>G
chr7:g.73199760C>T
chr1:g.43972155C>T
chr9:g.127894560G>C
chr10:g.47461690A>C
chrX:g.9406416G>A
chr13:g.52189930delA
chr3:g.195782300G>T
chr1:g.157539326C>T
chr16:g.89914766T>C
chr5:g.37008031_37008032insT
chr1:g.77933192delA
chr17:g.7674953T>A
chr7:g.87440222C>G
chr20:g.34438502G>A
chr4:g.152328233G>A
chr7:g.100198892C>T
chr17:g.82172654T>C
chr15:g.25721819C>T
chr3:g.179204540C>G
chr1:g.150268720G>A
chr11:g.1097284A>C
chr8:g.132751911C>T
chr15:g.41512260G>A
chr12:g.14805773A>T
chr3:g.81591153delA
chr12:g.128544001G>A
chr6:g.167976203G>T
chr7:g.63292238T>A
chr10:g.60072715_60072716insTGATGTAAGAGAGAATCACATTGGTC
chr1:g.12795871C>T
chr10:g.3149727C>T
chr7:g.73594270G>A
chr2:g.161993077A>T
chr8:g.76706436G>A
chr6:g.75183958G>A
chr21:g.39397049delT
chr9:g.98290285T>G
chr5:g.141303270G>A
chr16:g.29993707G>T
chr9:g.32633085C>T
chr10:g.92349487C>T
chr11:g.1097422C>A
chr10:g.8069531_8069532insCTGGAGG
chr17:g.7675095C>T
chr12:g.96649952delACAA
chr17:g.41041052T>C
chr17:g.48612722delGAGCGA
chr3:g.109312624G>A
chrX:g.47202408C>T
chr3:g.195783893_195783894insATGAAG
chr11:g.60297290G>A
chr11:g.56417860C>T
chr20:g.8708731C>T
chr10:g.87933147C>T
chr12:g.14651472C>A
chr5:g.173328411G>A
chr1:g.16029975C>T
chr10:g.8069550_8069551insGG
chr6:g.70225960G>A
chr3:g.138398520G>C
chr20:g.47246328delT
chr4:g.68497135G>T
chr15:g.20534480T>G
chr16:g.81711619delAAA
chr19:g.36340093G>A
chr3:g.195779136G>A
chr6:g.32371778G>A
chr9:g.39072847A>C
chr5:g.35026217A>T
chr2:g.167246966G>A
chr17:g.12113299G>T
chr8:g.103912120G>A
chr8:g.54621110C>T
chr4:g.88467181C>A
chr1:g.226385596C>T
chr17:g.7673781C>T
chr4:g.39308736G>C
chr6:g.101889682C>T
chr7:g.73109922C>G
chr6:g.11190902C>T
chr16:g.68801726C>T
chr1:g.230843685C>T
chr4:g.82871986C>A
chr17:g.61944389A>T
chr9:g.105721537G>C
chr17:g.8492484G>C
chr18:g.49974458G>A
chr6:g.131604216T>C
chr6:g.130899569C>T
chr11:g.56137390G>A
chr2:g.75701332_75701333insGTCTCTACTGTGTG
chr9:g.99132587_99132588insTACTC
chr16:g.67036692G>A
chr6:g.108680760delAAAAAAC
chr1:g.156959137G>A
chr7:g.77779461A>T
chr11:g.57700415delATAT
chr3:g.195783335C>G
chr5:g.140843246C>G
chr4:g.43030452G>A
chr9:g.107487067T>G
chr2:g.113577628G>A
chr8:g.63023989T>G
chr1:g.148483114G>A
chr14:g.104105368C>T
chr12:g.114680977G>A
chr17:g.12113330delAA
chr10:g.12167887G>A
chr13:g.100262751C>G
chr19:g.56816338C>T
chr2:g.80647802G>A
chr17:g.7673764C>T
chr6:g.109980276C>T
chr17:g.7673823C>T
chr13:g.30461159T>C
chr10:g.47461770G>A
chr8:g.42437370C>T
chr1:g.229635521C>T
chr11:g.108365208C>T
chr15:g.20541692T>A
chr16:g.4652050A>G
chr1:g.206732725G>A
chr2:g.208129787C>T
chr1:g.212994772T>A
chr15:g.41848575C>T
chr4:g.89113094C>T
chr12:g.108918088C>T
chr1:g.244842123delT
chr8:g.108248673G>A
chr16:g.28752578G>A
chr2:g.44372792C>T
chr19:g.35802234G>A
chr19:g.12318419A>T
chr1:g.185143947_185143948insAGGTCTCCTTT
chr16:g.11060948G>A
chr1:g.182473775G>A
chr12:g.284141A>T
chr5:g.140871292C>T
chr2:g.127628415G>A
chr1:g.113856428_113856429insT
chr21:g.25734946C>T
chrX:g.93671718C>T
chr15:g.84512370T>C
chr11:g.73355622G>A
chr22:g.23064045G>A
chr10:g.79906701G>T
chr5:g.141409779G>A
chr5:g.38504076G>C
chr3:g.179218295A>G
chr22:g.15721600C>A
chr12:g.133204386delCTT
chrX:g.154928964_154928965insT
chr10:g.47551880C>T
chr12:g.18093G>A
chr7:g.92041081A>T
chr3:g.150703782T>C
chr7:g.81751849G>A
chr6:g.152483113G>A
chr20:g.62139832C>T
chr5:g.56882632_56882633insA
chr1:g.11829288C>T
chr12:g.118033897A>T
chr3:g.179234169G>A
chr21:g.14216238G>C
chr7:g.31753086T>C
chr3:g.105720244C>T
chr15:g.82434267T>C
chr14:g.23042784G>A
chr1:g.247738656A>C
chr17:g.62737664G>A
chr6:g.136669373C>T
chr19:g.50876421T>C
chr17:g.7670684C>G
chr10:g.8073911_8073912insT
chr1:g.156767937C>G
chr17:g.56960986G>A
chr1:g.247672269C>T
chr6:g.95586980_95586981insAATAG
chr11:g.71800085C>T
chr7:g.152148495G>A
chr4:g.113237160C>T
chr9:g.137816012G>A
chr7:g.6791975C>T
chr15:g.61854524G>A
chr17:g.7675237C>T
chr6:g.26198880C>G
chr7:g.73203446A>G
chr1:g.240811922A>C
chr17:g.12125321C>T
chr14:g.64052036_64052037insT
chr6:g.150733903G>A
chr3:g.140175986C>T
chr4:g.1237629C>T
chr11:g.73976660C>T
chr17:g.7673781C>G
chr1:g.56792765_56792766insGAT
chr2:g.38298478_38298479insGGTTTTTTAGTGACTAATC
chr2:g.160200111C>T
chr20:g.31665881C>T
chr9:g.81915560C>T
chr1:g.156946156C>T
chr3:g.30693848C>T
chr2:g.26484516G>A
chr17:g.7675124T>C
chr6:g.169239624G>C
chr5:g.154409559G>A
chr17:g.7676046delC
chr3:g.195779637G>A
chrX:g.70259201G>A
chr13:g.46705129G>A
chr2:g.95893563_95893564insAGTAAGGG
chr12:g.22524531C>T
chr3:g.152300136T>A
chr16:g.68815760G>A
chrX:g.149546788C>G
chr12:g.130371668delT
chr9:g.101671085_101671086insATATTGTAGG
chr1:g.205935748C>G
chr2:g.130690216G>A
chr1:g.246851436C>T
chrX:g.32362797C>G
chr3:g.142383406C>T
chr1:g.160041096G>C
chr6:g.87259788delAG
chr19:g.54337571C>T
chr17:g.7675218T>C
chr3:g.195778903G>A
chr3:g.179199148G>A
chr3:g.195784346C>T
chr22:g.21184012A>G
chr15:g.52225518G>A
chr22:g.21184168A>G
chr7:g.38239882A>G
chr7:g.25226959delT
chr14:g.106129587C>T
chr11:g.65297143G>A
chr22:g.41149095C>T
chr3:g.14684366C>T
chr5:g.35013026C>T
chr17:g.7674935C>A
chr11:g.10853139G>A
chr6:g.31164465C>T
chr3:g.186268802G>A
chr9:g.85589630G>A
chr8:g.112301862G>A
chr2:g.196732739delT
chr3:g.179230256A>G
chr3:g.14667104T>A
chr10:g.51698082G>A
chr4:g.39062858G>A
chr7:g.137015034G>A
chr18:g.48040714delC
chr9:g.91724309A>G
chr4:g.165041006G>C
chr11:g.59859143C>G
chr9:g.68247761A>G
chr3:g.195782805C>G
chr1:g.6197725delT
chr15:g.80457938C>T
chr8:g.109442980_109442981insTGGGGGAAAGACTGGTAGGAAGA
chr7:g.66092601C>G
chr1:g.15932874G>A
chr5:g.141383365G>A
chr5:g.80455622G>A
chr15:g.82345252T>A
chr7:g.152194515G>A
chr16:g.89630441G>T
chr1:g.114680390G>A
chr12:g.123673612C>T
chr18:g.47841840G>C
chr15:g.30410205C>T
chr1:g.170726389C>T
chr11:g.2317875G>A
chr22:g.21183903G>T
chrX:g.134991248C>T
chr8:g.85660933A>C
chr16:g.11802C>A
chr11:g.59206510delTATA
chr21:g.34880697_34880698insCC
chr19:g.8962921C>T
chr9:g.62804060T>G
chr17:g.7674887C>A
chrX:g.70201972T>G
chrX:g.153779224A>C
chr1:g.155325191delG
chr22:g.18370388G>A
chr12:g.57479211G>A
chr6:g.152011697G>C
chr2:g.73089011T>G
chr3:g.33152561T>A
chr1:g.26864366C>T
chr20:g.18316702C>G
chr20:g.18449013C>T
chr4:g.117085073C>T
chr11:g.1097286C>T
chr17:g.7674250C>T
chr4:g.9368864C>T
chr12:g.55248121T>A
chr19:g.48282461G>A
chr12:g.76764199C>T
chr6:g.56498001_56498002insGAAACTGACAGTGTTTATGGCCCCAACTTAAAACTGCC
chr9:g.97307744C>T
chr4:g.141234102_141234103insACA
chr17:g.7673704G>A
chr1:g.114876769G>A
chr1:g.35115317T>C
chr2:g.68042836G>A
chr11:g.121555273C>T
chr17:g.63862360G>A
chr12:g.46769410_46769411insATTATTA
chr1:g.109415307C>T
chr17:g.7673740C>A
chr2:g.174847037_174847038insTT
chr4:g.186620407G>A
chr6:g.85622634delTG
chr14:g.37592107T>C
chr19:g.37669336G>C
chr17:g.18512614G>A
chr8:g.85341635delT
chr5:g.161546674C>A
chr1:g.155319905C>G
chr10:g.87958013delA
chr14:g.23394213G>A
chr2:g.8858286A>G
chr9:g.12702411delACAA
chr16:g.3023235G>C
chr1:g.159835151G>A
chr22:g.18370572T>C
chr11:g.89717842C>G
chr13:g.113667442G>A
chr2:g.32251002G>A
chr20:g.24949463C>T
chr1:g.148117657C>T
chrX:g.105905339G>A
chr3:g.195779499T>G
chr4:g.141234101_141234102insAGACAAG
chr15:g.101759784C>T
chr1:g.146140007C>T
chr16:g.2038416T>C
chr10:g.88941238C>T
chr5:g.146131125delA
chr19:g.52067315C>G
chr3:g.179199156delAAG
chr17:g.7673788G>T
chr21:g.34880559_34880560insT
chr3:g.12405986C>G
chr16:g.50323649C>T
chr12:g.99779904G>C
chr3:g.195780658A>G
chr15:g.59208187A>T
chr11:g.106011067C>A
chr17:g.7674262T>C
chr3:g.9750183G>A
chr1:g.114741659C>T
chr1:g.158683496C>T
chr17:g.28675012G>T
chr18:g.58919530G>A
chr17:g.47673126G>T
chr15:g.84512453G>A
chr12:g.119752115G>A
chr17:g.7676041delG
chr8:g.140458280C>G
chr7:g.99195186G>A
chr7:g.31338307C>T
chr7:g.36420268_36420269insCAGTT
chr13:g.46742124delC
chr7:g.154962361G>A
chr14:g.31014652G>T
chr1:g.240207052C>T
chr11:g.124881312_124881313insC
chr20:g.62003255G>C
chr11:g.76550329G>A
chr2:g.48617848A>G
chr1:g.220631110G>A
chr11:g.4489597C>G
chr13:g.102735998_102735999insCAG
chrX:g.103825703C>T
chr3:g.169796061T>C
chr1:g.149480744A>G
chr11:g.6456169C>T
chr1:g.149079092C>T
chr10:g.87960952C>G
chr6:g.54349810C>T
chr7:g.101053126G>A
chr2:g.159227952G>A
chr2:g.85544640G>A
chr14:g.21391015T>G
chr9:g.12821545A>C
chr1:g.74109457G>A
chr2:g.113578749T>C
chr7:g.93276367_93276368insTGTAACATTTG
chr17:g.27610142C>T
chr1:g.26779863C>T
chr21:g.18397894C>G
chr5:g.141980224G>A
chr17:g.60017450C>G
chr2:g.71612667delC
chr3:g.195779189C>G
chr4:g.173528750C>G
chr7:g.156658208G>A
chr8:g.109442978_109442979insGCACACAAGGAT
chr6:g.26031841C>T
chr4:g.75801193G>C
chr2:g.181548237G>T
chr6:g.26124172G>A
chr9:g.81948029G>A
chr17:g.7673806C>T
chr1:g.235830090delT
chr3:g.49375472C>G
chr11:g.74977143delTG
chr9:g.83978243C>T
chr15:g.77470972G>A
chr11:g.66424673C>T
chr22:g.20690294_20690295insGGGCCT
chrX:g.5903645C>T
chr19:g.11453791A>C
chr7:g.132785651C>G
chr7:g.117509089C>T
chr5:g.124744861delCTT
chr9:g.34833096C>T
chr7:g.98310578G>A
chr1:g.204618558C>T
chr22:g.36312189C>T
chr20:g.46504275G>C
chrX:g.120437302_120437303insATAT
chr1:g.152088045C>T
chr21:g.40708581G>A
chr16:g.68808758_68808759insC
chr15:g.82523985T>C
chr3:g.97942778A>C
chr17:g.74372142G>A
chr6:g.26123691C>G
chr20:g.33290992C>T
chr12:g.56315142G>C
chr7:g.152248516C>A
chr17:g.7688640C>T
chr6:g.116253681C>T
chr12:g.52550085C>T
chr5:g.56864852_56864853insA
chr15:g.41823800G>A
chr1:g.148107094G>T
chr6:g.29355545G>C
chr17:g.7676037A>G
chr1:g.200554579C>T
chr1:g.146989690G>A
chr9:g.128494581G>A
chr14:g.49852757G>A
chr5:g.149376947G>A
chr17:g.7674872T>G
chr11:g.1097436C>G
chr15:g.83572663C>T
chr6:g.39114943C>T
chr5:g.43294789G>C
chr8:g.139618891G>C
chrX:g.26161732G>A
chr4:g.112649598delA
chr5:g.131461940G>A
chrX:g.151924469C>T
chr5:g.21751618G>T
chr8:g.21693172delT
chr12:g.30982601G>A
chr11:g.6002356_6002357insCACCTTT
chr3:g.196937345delA
chr5:g.143820485C>T
chr4:g.72548836_72548837insGTATGTT
chr3:g.130398050C>T
chr7:g.44059554G>A
chr16:g.84170100G>A
chr1:g.24057606C>T
chr8:g.85657567G>T
chr21:g.17793548_17793549insTCCCAGAATTA
chr1:g.227101218G>T
chr12:g.64420423G>C
chr19:g.52704413G>C
chr5:g.100380135G>A
chr19:g.32862182C>T
chr12:g.119714310C>T
chr10:g.102011755G>T
chr6:g.26107930_26107931insGATTATGATTTATTAGATTGC
chr11:g.14279028G>A
chr12:g.85836427_85836428insCCC
chr17:g.7675216C>G
chr10:g.8073978_8073979insT
chr12:g.8650521G>A
chr9:g.104618120_104618121insA
chr6:g.108680604T>C
chr5:g.100389530A>C
chr13:g.30461097C>G
chr11:g.1097440C>G
chr19:g.41316757C>A
chr7:g.141929805delA
chr3:g.179234286G>A
chr1:g.158078116C>T
chr15:g.72666062C>A
chrX:g.118649021C>T
chr3:g.195778892G>A
chr16:g.68829719delTGCACCAACCCTCA
chr1:g.148537901G>C
chr12:g.132044829C>T
chr10:g.8073992_8073993insC
chr2:g.29036613G>A
chr8:g.103407692G>C
chr1:g.213006929delA
chr1:g.181711048C>T
chr3:g.195788541G>A
chr2:g.69458708delCACA
chr5:g.56887413_56887414insT
chr2:g.237527439G>A
chr11:g.57496066G>A
chr12:g.122340885G>C
chr19:g.29812659C>T
chrX:g.3626465G>T
chr7:g.128656465G>C
chr5:g.7301408G>A
chr17:g.7674250C>A
chr7:g.36420270A>T
chr22:g.21127139T>C
chr7:g.74822357C>G
chr10:g.121498520A>T
chr11:g.26565561_26565562insGGCTTC
chr15:g.88881496G>A
chr4:g.87613288G>A
chr8:g.74364209A>G
chr9:g.2643403G>A
chr19:g.7520653C>G
chr12:g.85836428G>T
chr2:g.165994303C>G
chr22:g.21184007C>G
chr17:g.29262730delTATA
chrX:g.34131780C>T
chr3:g.184165431T>A
chr11:g.59477793C>T
chrX:g.101392160G>T
chr2:g.49922227C>G
chr1:g.114677972G>A
chr6:g.32162571C>G
chr5:g.141102368C>T
chr3:g.195781035_195781036insGTGGATGCCGAGGAAGCGTCGGTGACAGGAAGAGGGGTGGTGTCACCTGTGGATACTGAGGAAAAGCTGGTGACAGGAAGAGGGGTGGCGTGACCTGTGGATACTGAGGAAGTGTCGGTGACAGGAAGAGTCGTGGTGTCACCT
chr7:g.84999496G>A
chr19:g.18924945C>T
chrX:g.29283003C>T
chrX:g.100407742G>A
chr13:g.35475922C>T
chrX:g.154477906C>T
chr16:g.48105295G>A
chr1:g.120890245T>C
chr19:g.19535082G>A
chr12:g.129084562G>A
chr4:g.84716993C>G
chr12:g.6593114G>A
chr15:g.88655544C>T
chr2:g.202377490C>T
chr10:g.1159800A>C
chr6:g.167951904G>A
chr1:g.26731383C>T
chr16:g.4576025G>A
chr12:g.6846796C>T
chr2:g.173359333G>T
chr16:g.10532765T>C
chr3:g.179199066G>A
chr8:g.75014849C>T
chr22:g.37294674G>A
chr3:g.179199088G>A
chr4:g.139719522C>G
chr6:g.4068384T>A
chr7:g.108240018C>G
chr17:g.39724008G>T
chr19:g.42089711delTATA
chr4:g.678983G>C
chrX:g.115289768G>A
chr2:g.148997385G>A
chr13:g.30461272A>G
chr12:g.56138482C>T
chr6:g.89931935delATATATAT
chr3:g.112361812A>T
chr18:g.109155A>C
chr22:g.29767510C>T
chr12:g.121810826G>A
chr2:g.196145940G>A
chr5:g.160615942C>T
chr3:g.184386725C>T
chr5:g.56885985delGTT
chr6:g.32936018delCTTC
chr4:g.152350097C>G
chr1:g.69968A>G
chr3:g.179234287A>T
chr19:g.53679965G>A
chr19:g.16762100C>T
chrX:g.48969157G>A
chr22:g.23316506A>G
chr12:g.132286414G>A
chr1:g.160799833A>C
chr7:g.141838165_141838166insGGAG
chr8:g.72936047G>A
chr12:g.17743A>G
chr13:g.31323787C>T
chr7:g.122011543C>T
chr3:g.195784968A>T
chr18:g.9256209delA
chr9:g.114309262C>T
chr7:g.36407850G>A
chr12:g.50476076delATAT
chr7:g.36406550C>G
chr15:g.82345000T>A
chr17:g.41503364G>A
chr1:g.151165245G>A
chr6:g.149680259G>A
chr22:g.37773929C>G
chr5:g.90658231_90658232insTCCTGTCCTAAATTTT
chr8:g.91959488G>A
chr13:g.41131185_41131186insC
chr11:g.57485117G>A
chr1:g.247965464G>A
chr13:g.108233701_108233702insTA
chr8:g.67292072G>A
chr12:g.8521486_8521487insAGATATA
chr20:g.32453753delG
chr2:g.130140020C>T
chr21:g.43774137C>T
chr10:g.17910664C>A
chr4:g.80287000_80287001insG
chr1:g.148989265A>G
chr4:g.102887435A>T
chr1:g.58576516G>C
chr10:g.8073956_8073957insG
chr1:g.120824131G>C
chr1:g.153934173C>T
chr21:g.40012966delA
chr12:g.6016764T>A
chr22:g.20114682C>G
chr20:g.23826447G>A
chr1:g.207887920C>T
chr9:g.69385814A>C
chr3:g.195781023_195781024insGTGGCGTGACCGGTGGATGCCGAGGAAGCGTCGGTGACAGGAAGAGGGGTGGTGTCACCTGTGGATACTGAGGAAAAGCTGGTGACAGGAAGAGGGGTGGCGTGACCTGTGGATACTGAGGAAGTGTCGGTGACAGGAAGAGTC
chr19:g.9997417G>C
chr17:g.45477745T>C
chr16:g.68815725C>T
chr8:g.123787733C>G
chr12:g.41025315G>C
chr12:g.52951734G>C
chr17:g.3753372G>A
chr17:g.20416503T>C
chr1:g.119419512C>G
chr17:g.39724004C>G
chr9:g.97121987C>G
chr16:g.68801877_68801878insC
chr3:g.195779151C>G
chr15:g.101752908G>C
chr3:g.132328273C>T
chr14:g.47061568delT
chr13:g.96986489C>T
chr19:g.42926715C>T
chrX:g.117919606T>C
chr18:g.23784064G>A
chr3:g.101766639delATATAT
chr2:g.237817157delT
chr10:g.99847099G>A
chrX:g.47846172G>A
chr10:g.72893711delA
chr8:g.38347698G>C
chr10:g.16505123G>C
chr14:g.106592833C>G
chr11:g.60172124A>T
chr1:g.32363805T>C
chr2:g.159332656C>T
chr5:g.90708837G>T
chr2:g.21011205delTCT
chr1:g.206478133G>C
chr5:g.141394385G>T
chr18:g.2784504C>T
chr8:g.23302081G>A
chr12:g.53975522G>A
chr12:g.121781195G>T
chr10:g.50629798G>C
chr1:g.229635126G>A
chr12:g.96952147delA
chr12:g.106072800A>C
chr12:g.95107594C>T
chr9:g.133256294C>T
chr2:g.28412163G>A
chr12:g.11030413delGATGAAGGC
chr3:g.44885362C>A
chr9:g.115042327T>G
chr18:g.34766028G>C
chr2:g.201761057_201761058insTTTATAAGTA
chr15:g.35237980_35237981insTCTTTAATTTTGTTGCCACAT
chr19:g.52706565G>C
chr15:g.75359713G>C
chr5:g.157509364G>C
chr5:g.95906708T>C
chr19:g.21537233G>C
chr7:g.138504329C>G
chr19:g.37739630G>C
chr19:g.41719931G>A
chr2:g.206311574G>T
chr5:g.140808338T>C
chr4:g.10443175T>C
chr7:g.123464853C>T
chr17:g.66029929_66029930insCTGAGGCTAGTGGGGCAGGATGTGCCAGGAACATGGAGTCACACG
chr20:g.62197876C>G
chr20:g.25217545G>A
chr2:g.85599918C>G
chr21:g.31266745G>A
chr19:g.49355329C>A
chr19:g.38489348G>T
chr11:g.75005447T>G
chr10:g.112430827C>T
chr1:g.32679796C>G
chr2:g.211750693G>A
chrX:g.67722972C>A
chr15:g.65059369C>T
chr21:g.32641964G>A
chr14:g.64141953G>T
chr15:g.67187449A>C
chr11:g.125489212G>T
chr9:g.111722536G>A
chr1:g.54012253T>C
chr9:g.19120946C>A
chrX:g.26193816C>T
chr19:g.52064476G>C
chr2:g.119967902A>G
chr10:g.45648339T>C
chr7:g.2915253C>G
chr19:g.35752278G>A
chr7:g.42917636C>T
chr13:g.91693713C>A
chr7:g.105168028C>T
chr11:g.6570129C>A
chr5:g.74800936A>G
chr1:g.167435206T>C
chr17:g.31358599delAATACCA
chrX:g.53087790G>A
chr17:g.40164065C>T
chr15:g.25182244C>T
chr17:g.36940986G>C
chr1:g.91643031T>A
chr1:g.150268061G>T
chr11:g.59212787C>A
chr8:g.94664727C>T
chr12:g.92707930G>A
chr12:g.65866923A>G
chr20:g.18497235G>C
chr17:g.49993574C>T
chr5:g.21459692G>T
chr17:g.78476606C>G
chr3:g.43079777_43079778insA
chr9:g.104569972G>C
chr14:g.64218488G>T
chr1:g.35479003G>C
chr12:g.96015652G>A
chrX:g.68522770C>G
chr2:g.127624264C>G
chr5:g.33937417C>T
chr1:g.156015015G>C
chr12:g.10065655C>G
chr9:g.35825818_35825819insG
chr17:g.80013476G>T
chr19:g.31278190T>A
chr7:g.36514488delCG
chr19:g.53978159C>T
chr4:g.110860644_110860645insA
chr19:g.17377053G>A
chr2:g.119680929G>T
chr2:g.138288526C>G
chr9:g.112998354G>A
chr19:g.35841755G>T
chr19:g.58498617G>T
chr17:g.74920665G>C
chr8:g.103318638T>C
chr1:g.15566105C>G
chrX:g.54758688C>T
chr19:g.55080189G>A
chr14:g.73170920G>A
chr15:g.90080137T>G
chr3:g.196948197C>T
chr14:g.31113131A>C
chr17:g.75104109G>A
chr13:g.49560039C>A
chr2:g.173266565C>T
chr1:g.38045855C>G
chr11:g.118971735G>A
chr17:g.40703140T>A
chr1:g.231561179G>A
chr9:g.110168484A>G
chr2:g.151627206C>T
chr15:g.40466021C>T
chr12:g.44703804delT
chr6:g.73480102G>C
chr2:g.96115607G>C
chr1:g.40268467T>C
chr15:g.38339856G>C
chr7:g.3971487C>T
chr5:g.141209152G>C
chr2:g.206028136G>A
chr15:g.41887942G>C
chr11:g.1630211G>C
chr21:g.39420762G>C
chr1:g.201216516C>A
chr11:g.58422660_58422661insGAATTTTA
chr5:g.647896G>C
chr17:g.67983487C>T
chr7:g.138584799C>G
chr17:g.64537097G>C
chr22:g.29049651C>G
chr1:g.167854396C>G
chr3:g.48460208G>C
chr17:g.74852505G>C
chr19:g.54805965C>T
chr12:g.102840489G>T
chr3:g.33153123G>A
chr13:g.24691145C>G
chr1:g.86580503_86580504insGTCAAATTGC
chrX:g.120612452delTGG
chr20:g.35287069C>A
chr10:g.73520949C>T
chr17:g.30784330C>T
chr11:g.6623776G>A
chr4:g.67670474G>A
chr14:g.22876696_22876697insC
chr1:g.220813331A>T
chr12:g.124911923T>G
chr3:g.179210431_179210432insATA
chr6:g.31271117A>C
chr22:g.50609755_50609756insGC
chr11:g.125430003G>C
chr4:g.153704905C>T
chr1:g.205161384C>T
chr3:g.38847530G>T
chr7:g.115940898G>T
chr3:g.184187955G>C
chr4:g.133163255C>T
chr17:g.4892723G>A
chr16:g.67649143G>A
chr4:g.143880449G>C
chr3:g.138434962T>C
chr17:g.63945543G>T
chr2:g.63599167T>C
chr11:g.57744442G>C
chr9:g.98388933T>G
chr9:g.68529748G>A
chr13:g.20005123G>C
chr10:g.95621209delGTGGAGAGGCTTAAACGTTTCA
chr3:g.111884681C>T
chr19:g.58548503C>T
chr17:g.18277954C>G
chr12:g.114672124G>A
chr18:g.31857611A>C
chr6:g.127454077G>A
chr17:g.61984721G>C
chr17:g.62373868G>A
chr10:g.107164250G>A
chr1:g.119922381G>A
chr7:g.37876907G>A
chr11:g.6785449T>G
chr15:g.82434579C>A
chr9:g.128242238C>T
chr5:g.10261597G>T
chr7:g.129952619G>C
chr9:g.21367849C>T
chr2:g.71667427C>T
chr10:g.86206445C>T
chr17:g.3897781C>A
chr5:g.140562866C>T
chr4:g.121045765G>A
chr1:g.155322712C>G
chr1:g.147928548G>C
chr18:g.63796373T>C
chr4:g.48025218delAC
chr13:g.110198506G>A
chr8:g.58447655T>G
chr7:g.121329656_121329657insTT
chr8:g.3118453T>C
chr7:g.140601656C>G
chrX:g.47467615C>T
chr13:g.30657616A>G
chr7:g.63292221C>A
chrX:g.66198998G>A
chr3:g.138464389G>C
chr11:g.64685694G>C
chr1:g.119940694A>G
chr4:g.17693346C>G
chr12:g.82896069C>T
chr2:g.178853571A>G
chr7:g.92070040_92070041insAGCAAATCATCTGAAAGAAAAAACAGACAAAACAACAACAACAACAAAAAACTCTTCCCTTCTCAGGACTAAGACATGCA
chr19:g.42442830C>T
chr19:g.20398799G>C
chr9:g.120961553G>A
chr2:g.27581252C>A
chr4:g.99279448C>G
chr14:g.73955832A>T
chr22:g.33761375G>T
chr12:g.122225993delGCCAACTCTTCAGAGCCGCCATTGTGCAGCGCGCG
chr14:g.36711372G>C
chr9:g.128615836A>G
chr2:g.53813054G>A
chrX:g.115165925G>C
chr19:g.12043886T>C
chr4:g.139336916C>T
chr3:g.179219657T>G
chr11:g.117282156C>A
chr7:g.93253871T>C
chr7:g.32996278G>C
chr3:g.56435099A>G
chr16:g.682065G>A
chr1:g.152719926_152719927insAAGGGGTAGC
chr4:g.3439531C>G
chr3:g.52786406C>G
chr12:g.1083560_1083561insCTACA
chr11:g.35315041T>A
chr3:g.56737323G>C
chr14:g.102407425_102407426insT
chr20:g.10405222C>G
chr4:g.4226561G>A
chr19:g.39169588C>T
chr7:g.103119965delGACTGATAAGGACC
chr17:g.47284449C>T
chr3:g.130574014G>T
chr1:g.53461552G>A
chr15:g.72676386A>T
chr4:g.88706783C>A
chr5:g.66053949G>C
chr1:g.26729690C>T
chr10:g.102066525G>T
chr7:g.1503086G>C
chr4:g.7800511C>T
chr12:g.52469209G>A
chr7:g.72946233A>G
chr5:g.40853918A>T
chr2:g.151357747C>A
chr6:g.41194690T>G
chr12:g.4321227G>T
chr19:g.11807373T>G
chr18:g.36126415C>G
chr1:g.156596729A>G
chrX:g.129481121G>T
chr15:g.64397714G>A
chr6:g.16326877C>T
chr13:g.49207516A>G
chr9:g.19298059C>T
chr11:g.49169244G>A
chr2:g.55025151G>T
chr5:g.78418830C>G
chr7:g.92163345C>A
chrX:g.123464986C>A
chr6:g.31811637C>G
chr11:g.2146308C>T
chr8:g.91366606C>G
chr1:g.17623017G>A
chr11:g.66688774C>T
chr9:g.122984569G>T
chr6:g.33409689G>T
chr3:g.131243447C>T
chr17:g.42563156C>T
chr19:g.13778093G>A
chr10:g.17590265A>G
chr7:g.103195596G>A
chr1:g.212619171_212619172insTGGGTATAAAATGAGGATTCAATGAGGACTCCCCAGTCG
chr7:g.127377211G>T
chr17:g.63910799C>T
chr19:g.16191028G>T
chr9:g.109943547G>A
chr16:g.2190077G>T
chr1:g.8361394C>T
chr11:g.59713141G>A
chrX:g.123184512T>G
chr14:g.22496908G>C
chr17:g.59212870G>A
chr14:g.21373376C>G
chr10:g.31520669A>G
chr1:g.211778976C>T
chr4:g.159353782G>A
chr3:g.124913208C>T
chr17:g.7903893C>A
chr1:g.159951829G>A
chr1:g.23802404A>T
chr6:g.33320800delCTGTAA
chr6:g.18222158C>T
chr11:g.65649763C>A
chr17:g.8492838C>T
chr1:g.47269840C>G
chr14:g.58645551G>A
chrX:g.48263914T>A
chr4:g.3154303C>G
chrX:g.44232581T>G
chr9:g.5466805G>C
chr6:g.28125687G>A
chr6:g.33406871C>T
chr7:g.116740011C>T
chr12:g.48705785G>A
chrX:g.48354718G>C
chr17:g.31265318delT
chr3:g.37964595G>A
chr20:g.20022456T>C
chr22:g.45186761G>A
chr17:g.75784815C>A
chr19:g.54145759G>T
chr11:g.6566643G>T
chr17:g.28276927C>A
chr1:g.176595560G>A
chr10:g.87960950delCTCAGAAA
chr7:g.96028274C>T
chr19:g.43461691C>T
chr2:g.197487944T>G
chr2:g.21016645C>T
chr1:g.69919366G>A
chr21:g.37195686G>C
chr12:g.122806180C>T
chr3:g.98087413C>T
chr4:g.2689613G>C
chr7:g.92489769T>C
chr22:g.43983957C>T
chrX:g.120545476G>T
chr7:g.93135171C>G
chr15:g.89625491C>G
chr14:g.23379338G>A
chr10:g.120862894A>G
chr12:g.3648494A>G
chr3:g.9970625A>G
chr8:g.92010892A>G
chr9:g.121160195T>C
chr1:g.157524555G>A
chr2:g.37279928T>C
chr4:g.37446804G>A
chr17:g.40349810G>A
chr7:g.74819583T>C
chr11:g.7314182C>T
chr1:g.30933187G>C
chr19:g.37612672delGAAGCCCTACGAATGTAAGGAATGTGG
chr1:g.7663407C>G
chr20:g.57374752A>G
chr1:g.245540834G>T
chr5:g.1881948C>T
chr8:g.67296499G>A
chr9:g.35382490G>T
chr9:g.35736900C>T
chr1:g.22589270C>G
chr12:g.133058896C>T
chr5:g.80175042G>T
chr5:g.45396508C>T
chr19:g.33300501C>T
chr12:g.52608351C>A
chr19:g.7621160G>A
chr16:g.3289699G>T
chr1:g.27666361G>A
chr4:g.163528755G>T
chr6:g.33295558G>A
chr3:g.100862455G>A
chr22:g.32360359G>A
chr2:g.121457690C>G
chr19:g.38420184G>A
chr2:g.98312049G>T
chr2:g.27037678C>T
chr9:g.83806299T>A
chr3:g.133755549G>C
chr7:g.94551355G>A
chr1:g.203043474G>A
chr10:g.103613191C>T
chr20:g.34715119delA
chr12:g.40351628T>G
chr4:g.69639477C>A
chr4:g.83462590G>C
chr5:g.160394580C>T
chr3:g.40482001A>C
chr10:g.72341102C>T
chr7:g.151076338G>A
chr3:g.98497762T>G
chr2:g.96296540C>A
chr11:g.117989542C>T
chrX:g.70063145C>T
chr12:g.107739526C>G
chr2:g.73909054G>T
chr1:g.196790005delAC
chr20:g.35931393A>T
chr9:g.129003514G>C
chr2:g.229358287G>A
chr11:g.65720107T>C
chr12:g.70539002C>T
chr14:g.91621649T>G
chr13:g.44575765G>C
chr7:g.100786020C>G
chr5:g.132682625T>A
chr14:g.64932244G>A
chr20:g.49243831G>T
chr11:g.47245604G>A
chr6:g.133106126T>C
chr19:g.56224780C>T
chr2:g.86620416C>T
chr3:g.38727007C>T
chr6:g.12161465C>T
chr5:g.79082850C>G
chr16:g.67291683G>C
chr14:g.21371982G>A
chr13:g.41615076G>A
chr3:g.105702367A>T
chr21:g.46235257G>A
chr8:g.10609094G>T
chr15:g.74180139G>A
chr2:g.161417010G>A
chr9:g.6254512G>T
chr8:g.47817549G>C
chr3:g.50215737C>T
chrX:g.154156489G>A
chr15:g.99132643T>A
chr8:g.67172553G>A
chrX:g.151180720C>T
chrX:g.18584280T>A
chr2:g.88557845_88557846insC
chr12:g.122478369G>A
chr21:g.36239833G>A
chr20:g.59972071G>A
chr4:g.165333378C>G
chr19:g.6751154_6751155insA
chr5:g.129461512G>A
chrX:g.30668019G>A
chr17:g.41582485C>T
chr17:g.82083236G>T
chr8:g.143931577G>C
chr1:g.185099887delAAACCAG
chr10:g.49161602T>G
chr5:g.136052951G>T
chr10:g.27077525C>T
chr2:g.97738078C>T
chr9:g.138075861C>T
chr9:g.125239050T>G
chr12:g.51328516C>G
chr1:g.246540915T>G
chr1:g.43283069C>G
chrX:g.111744770C>A
chr3:g.171161298C>G
chr12:g.98601414G>A
chr3:g.123319765C>T
chr12:g.51891146C>A
chr14:g.63290979G>C
chr2:g.178532818delT
chr12:g.78148857C>T
chr8:g.26864475C>G
chr10:g.53823059A>G
chr12:g.19274665_19274666insTAAAGCAAATTAAGATTGCCTTATGAC
chr2:g.151650730G>T
chr18:g.2610796C>A
chr12:g.4744675G>T
chr4:g.89249805C>A
chr17:g.39462381C>A
chr6:g.65384412A>C
chr9:g.33442640G>A
chr4:g.113330377G>A
chr1:g.99875415A>C
chr19:g.14402741C>T
chr7:g.38384591A>G
chr14:g.88746254C>A
chr16:g.4988172C>T
chr11:g.119179771C>T
chr17:g.50626644C>T
chr12:g.6319009delCCACCTCACTG
chrX:g.141907694C>G
chrX:g.49077534G>A
chr7:g.103344710C>A
chr3:g.58655581T>G
chr19:g.3771576C>G
chr9:g.32634888A>G
chr18:g.14851809_14851810insGGGTT
chr19:g.1043432T>A
chr16:g.30570424T>C
chr11:g.104037309C>T
chr12:g.71701181A>T
chr18:g.51177240_51177241insTTTT
chr2:g.189563865A>C
chr11:g.117437134C>T
chr15:g.42692427G>A
chr11:g.315068C>G
chr3:g.185675805C>T
chr7:g.130385882A>G
chr9:g.111707914C>A
chr7:g.141790880C>A
chr5:g.141183245G>A
chr11:g.7043945_7043946insAGTAAT
chr7:g.120745910G>A
chr19:g.29812675A>T
chr16:g.89524023G>T
chr2:g.20003287C>A
chr19:g.33096346C>T
chr10:g.37831487C>T
chr8:g.1549165A>T
chr1:g.152107726C>G
chr14:g.23095168C>A
chr5:g.141421639G>A
chr11:g.74859223C>T
chr19:g.8975938G>T
chr3:g.49718904G>C
chr4:g.189982606T>C
chr2:g.102371963C>G
chr1:g.119033036C>A
chrX:g.53562200G>C
chr5:g.34020662C>T
chr6:g.163315083_163315084insTTTGAATTAAG
chr1:g.67687841C>G
chr11:g.55839633G>T
chr4:g.20617065C>T
chr3:g.86940444A>G
chr12:g.6826842G>A
chr19:g.12852167C>G
chr15:g.65156915C>T
chr2:g.189666484C>G
chr15:g.43181207G>C
chr1:g.180166488C>T
chr3:g.126434280C>T
chr22:g.37911996G>C
chr1:g.65918626G>C
chr19:g.44329433G>C
chr2:g.73424840G>C
chr1:g.6151039C>A
chr17:g.28612633G>A
chr1:g.39335145C>T
chr22:g.21636597C>G
chrX:g.119452867A>C
chr17:g.55720863C>T
chr19:g.2426967C>A
chr5:g.141485670C>T
chr1:g.39841876C>G
chr16:g.87413116G>A
chr2:g.229591823G>C
chr6:g.43365436C>T
chr4:g.119030763C>T
chr5:g.140564390G>T
chr8:g.2957797G>A
chr3:g.4766640G>A
chr19:g.52040578G>C
chr5:g.59988329G>C
chr1:g.52033234T>C
chr3:g.189880302C>G
chr16:g.2769193T>A
chr7:g.130383413G>A
chr1:g.158669419C>T
chr15:g.82524014G>T
chr19:g.40013827_40013828insTAGTGAAGGTGTTAGGCCTT
chr15:g.55435044G>A
chr1:g.241588749delT
chr16:g.30086268G>A
chr2:g.25091358G>A
chr6:g.35424642G>A
chr16:g.2586864G>A
chr1:g.86494350G>A
chr17:g.32021536G>A
chr7:g.117548776G>C
chr3:g.179234295A>C
chr8:g.130780684_130780685insAATATTTATTGG
chr1:g.205061308T>A
chr14:g.23557010G>A
chr14:g.31107157C>T
chr13:g.28272244_28272245insAAGCTGTTTA
chr19:g.10115240delC
chr22:g.42127968C>T
chrX:g.65501816G>A
chr1:g.182876878G>T
chr21:g.30881534_30881535insTAAGT
chr19:g.54806007G>C
chr7:g.25225052C>T
chr1:g.236482285C>T
chr11:g.7001484A>G
chr4:g.13542187G>A
chr8:g.109507781T>A
chr16:g.68823441delTGGGTGACTACAAAATCAATCTCAAGCTCA
chr2:g.70809815C>T
chr17:g.7676050A>C
chr1:g.193233085G>A
chr1:g.101239928A>C
chr17:g.81695188C>T
chr16:g.28495761G>C
chr20:g.62396587C>T
chr2:g.102028236G>A
chr3:g.4811454G>A
chr9:g.125237017C>G
chr20:g.2795830G>A
chr7:g.11038806G>A
chr12:g.71125373C>T
chr19:g.964348C>G
chr12:g.100503360A>C
chr16:g.67990092C>T
chr16:g.24123960G>A
chr9:g.67110539C>T
chr1:g.112923460delTGGGGCGCCGTAG
chr5:g.149899469A>G
chr1:g.213242105G>A
chr5:g.61473034C>A
chr3:g.190620372G>C
chr17:g.56482405A>C
chr7:g.139412549A>G
chr9:g.110406771G>A
chr12:g.50355621G>C
chr1:g.220141838G>A
chr1:g.110517341T>A
chr16:g.1571514G>C
chr12:g.132796135G>A
chr6:g.63721166T>A
chr20:g.46504326_46504327insGGTATCATGTTCATTTTTT
chr17:g.40966819_40966820insTGAATT
chr4:g.70335874G>A
chr11:g.93812071C>A
chr14:g.64141959G>T
chr19:g.20949257A>G
chr17:g.59028480C>T
chr2:g.101834412G>A
chr14:g.70523252G>A
chr4:g.86101138C>T
chr2:g.200571504T>G
chr3:g.107773165G>T
chr21:g.30289397G>A
chr10:g.117548384G>A
chr4:g.22747380C>T
chr5:g.111507371G>A
chr14:g.77422914G>A
chrX:g.29917501G>A
chr9:g.70259017T>G
chr7:g.11543017C>G
chr2:g.66512232C>T
chr19:g.50859785G>A
chr3:g.197943982G>A
chr7:g.47400789G>A
chr3:g.73065060C>T
chr13:g.83879424G>A
chr17:g.80997313T>G
chr17:g.35937771G>A
chr16:g.3317335G>A
chr7:g.23125428A>G
chr7:g.4909977C>G
chr1:g.37481634A>T
chr15:g.29718940C>T
chr16:g.31080213C>T
chr12:g.896417C>T
chr1:g.202186578A>T
chr1:g.180936504C>T
chr7:g.151355847G>A
chr21:g.44888893G>A
chr19:g.23358819G>A
chr5:g.96986650C>T
chr3:g.190855846C>A
chr1:g.206732713C>T
chr21:g.37227744C>G
chr7:g.143026856G>C
chrX:g.32573750C>T
chr9:g.35679915G>A
chr2:g.17516776A>T
chr1:g.169572338delGAAGTCCTGT
chr13:g.37024526_37024527insCCTCAGG
chr6:g.31464126G>A
chr14:g.80211430G>A
chr17:g.36103861delG
chr1:g.35565477C>G
chr9:g.110668919C>T
chr2:g.38823202G>C
chr5:g.177516428C>T
chr8:g.94495842A>G
chrX:g.153804231G>A
chrX:g.77636050C>A
chr15:g.21373686C>T
chr3:g.170480970C>T
chr17:g.31295551_31295552insTGCCATGTCTGAGAGTGTAGATTCTGTACAC
chr10:g.97589779G>C
chr3:g.168010817C>G
chr17:g.81179056G>A
chr7:g.26185839A>G
chr20:g.9539233G>A
chr2:g.15167310T>C
chr7:g.30496918C>G
chr1:g.143964897G>A
chr1:g.23417351C>G
chr1:g.151174776C>T
chr6:g.127287143_127287144insC
chr6:g.149802228G>T
chr2:g.107870765G>C
chr7:g.8022498G>A
chr14:g.106324313G>A
chr22:g.24188315G>T
chr13:g.102739404delC
chr8:g.123128280G>C
chr1:g.97720802T>C
chr19:g.54735283G>T
chr2:g.100948232C>T
chr15:g.39252525G>A
chr1:g.233666717G>A
chr7:g.48279750C>T
chr7:g.44516176A>G
chr15:g.89623684C>G
chr13:g.102892476G>A
chr19:g.41838141C>T
chr8:g.43122730C>T
chr14:g.21018006G>A
chr12:g.119712609C>A
chr15:g.41883470C>G
chr1:g.117153278delCACTGTGGGCTGGGGGAACCATCGGGGAGCCT
chr11:g.70435190C>T
chr6:g.130042774G>T
chr4:g.82904750C>T
chr18:g.24165079C>G
chr22:g.29046781G>C
chr5:g.132207719C>T
chr6:g.117311049G>C
chrX:g.18895135T>C
chr13:g.83880784C>T
chrX:g.48902232G>C
chr2:g.73228380C>T
chr1:g.237614145G>T
chr2:g.182982861C>A
chr2:g.151569366A>C
chr6:g.50857494G>A
chr2:g.87818618C>G
chr4:g.48602065T>A
chr2:g.218824283A>T
chr3:g.109099457C>G
chr12:g.125142243G>T
chr5:g.138264350G>T
chr20:g.45892270C>T
chr17:g.67920103G>T
chr4:g.155831915C>T
chr17:g.76002402G>A
chr19:g.2273084G>C
chr7:g.6505878C>A
chr22:g.20036847G>A
chr12:g.16813C>G
chr5:g.43298949G>T
chr11:g.128484904C>G
chr12:g.53213241G>A
chr4:g.121668330G>A
chr13:g.45194211G>A
chr1:g.243664806C>T
chr12:g.78180895G>A
chr1:g.92052578G>T
chr8:g.2116265C>G
chr12:g.54283121G>C
chr7:g.64077404C>A
chr19:g.35563431C>T
chr3:g.142555972G>C
chr3:g.138684638G>A
chr9:g.18928467G>C
chrX:g.119096525G>C
chr8:g.8238357C>T
chrX:g.16756697C>A
chr3:g.98799451T>C
chr11:g.72868027C>G
chr11:g.110165196C>T
chrX:g.132628749A>C
chr6:g.157292902C>G
chr1:g.113765884G>C
chr7:g.47774927C>G
chr5:g.77039613G>A
chr21:g.39765777delC
chr18:g.9280955G>A
chr1:g.205269618G>C
chr1:g.150648311C>A
chr3:g.44354766T>G
chr20:g.34856808C>T
chr2:g.127862232G>A
chr2:g.27375558C>T
chr11:g.110586291G>A
chr12:g.88084800G>C
chrX:g.49251430G>A
chr11:g.64262722G>A
chr7:g.156963208G>C
chr10:g.45626266A>C
chr12:g.18712899G>T
chr9:g.119238678G>A
chr3:g.139350293C>G
chr16:g.3664412G>A
chr19:g.34379560A>G
chr19:g.812045G>A
chr1:g.200913672G>A
chr8:g.125367088C>T
chr10:g.69930407G>A
chr1:g.201213265C>A
chr17:g.61744451G>A
chr4:g.1250704G>C
chr16:g.21202250C>T
chr19:g.42740493C>T
chr2:g.236363782T>C
chr11:g.108253898_108253899insT
chr1:g.113975917delAAGATT
chr19:g.56377096G>T
chrX:g.118825256delCATTGCAC
chr1:g.222728763G>C
chr2:g.218635869T>C
chr8:g.94407524G>A
chr14:g.100880793G>A
chr16:g.31962124C>G
chr13:g.113839745delC
chrX:g.72129931C>T
chr2:g.182935349T>C
chr10:g.119827846A>T
chr1:g.54786001C>T
chr3:g.42757070G>T
chr19:g.5456582C>T
chr9:g.135488271T>C
chr3:g.120167189C>G
chr3:g.121529766T>A
chr12:g.96651663C>A
chr11:g.70659938C>T
chr10:g.114575516C>T
chr8:g.123255342G>C
chrX:g.48904700C>A
chrX:g.46837050A>T
chr21:g.42409496C>T
chr4:g.13610992G>C
chr22:g.20949919C>G
chr7:g.99433322C>T
chr8:g.103912143C>T
chr1:g.150081982A>G
chr20:g.49636095G>A
chr18:g.225119delG
chr5:g.41313516C>T
chr1:g.54817113delTGCTCATGCAG
chr7:g.57119714T>C
chr2:g.210023065C>T
chr19:g.57873888A>G
chr22:g.24876655C>T
chr5:g.141923846C>T
chr17:g.40496120C>T
chr17:g.48625855delC
chr14:g.23526393C>T
chr22:g.37877862G>A
chr2:g.149471019delGTAGC
chr3:g.98264705G>A
chr1:g.175127044G>A
chr16:g.2767239G>A
chr17:g.6786822G>A
chr11:g.8937716delAGAAG
chr3:g.170483403C>T
chrX:g.130013795G>A
chr12:g.55294770A>T
chr1:g.158700037C>A
chr4:g.51995861G>T
chr11:g.118203737G>A
chr9:g.89362363T>A
chr15:g.48797480G>C
chrX:g.70678806C>T
chr2:g.238262240G>A
chr11:g.114298132C>A
chr3:g.100654856A>C
chr6:g.43008735C>G
chr4:g.121843996A>G
chr1:g.15462851A>G
chr17:g.11263477G>T
chr12:g.101765158G>A
chr14:g.69380393C>T
chr2:g.55917909T>G
chrX:g.52644530C>T
chr16:g.70325580T>C
chr6:g.116511834G>C
chr1:g.150751828C>T
chr20:g.53255161G>A
chr2:g.178642301C>G
chr22:g.29636838delATCAAGGACACAGTGGCC
chr15:g.55434918T>C
chr19:g.5212044C>T
chr10:g.119847704C>G
chr4:g.2716049G>A
chr15:g.83264496A>T
chr16:g.74300188G>A
chr1:g.161165604C>G
chr3:g.63480880C>T
chr18:g.61499254C>T
chr1:g.2172304G>C
chr2:g.219057605C>T
chr7:g.93103429G>T
chr16:g.48083945G>C
chr1:g.13263002G>C
chr20:g.23985743T>G
chr1:g.99309183G>C
chr9:g.15469025G>T
chr1:g.214369681C>T
chr3:g.49419131delCCCCGCTACCGG
chr17:g.12760698G>C
chr2:g.231528200G>A
chrX:g.77697625G>A
chr1:g.15928637G>C
chr18:g.36746957C>G
chr1:g.150711559G>C
chr3:g.149160126G>A
chr1:g.184711856C>A
chr19:g.36182950T>C
chr2:g.73919524G>T
chr19:g.43719784C>T
chr3:g.196472723A>G
chr17:g.1050143C>T
chr12:g.55400783A>G
chr6:g.18457284C>G
chr2:g.137242503C>T
chr7:g.85020304T>A
chr6:g.46691577C>T
chr17:g.7737077G>A
chrX:g.107926692C>G
chr5:g.65624887A>C
chr1:g.176695830C>T
chr17:g.74927454C>G
chr17:g.40779724G>A
chr1:g.184894190C>G
chr19:g.50249120C>T
chr7:g.101040549A>T
chr17:g.16553382A>G
chr7:g.158793715G>C
chr20:g.9421342G>A
chr20:g.46550563delT
chr3:g.51064486G>T
chr20:g.32453360G>A
chr18:g.31461245G>T
chr3:g.13875092G>A
chr15:g.20284173C>G
chr18:g.31474358C>T
chr11:g.34132183C>T
chr11:g.27127503G>A
chr12:g.64418972A>C
chr2:g.187346350C>G
chr21:g.41275536T>G
chr2:g.111100893G>T
chr14:g.92121794C>T
chr3:g.67008224G>A
chr11:g.123058771G>A
chr11:g.75790217A>G
chr5:g.68293728A>G
chr19:g.14773984G>T
chr7:g.148383794C>T
chr17:g.78561839C>T
chr16:g.75656422delA
chr10:g.842963_842964insGTGAT
chr14:g.23322253G>A
chr1:g.184037700C>G
chr10:g.68646301T>C
chr1:g.182872361C>T
chr3:g.177022839G>C
chr2:g.233256177C>T
chr3:g.159273876C>G
chr11:g.110136870G>A
chr13:g.91693690G>A
chr1:g.202967215delCCTTTT
chr3:g.49115106C>T
chr11:g.95788525_95788526insT
chr9:g.137051323T>C
chr1:g.145996069A>G
chr9:g.83889219C>T
chr2:g.44456725C>T
chr19:g.9690503G>A
chr9:g.74820427C>G
chr15:g.24676666G>T
chr10:g.87814466C>T
chr17:g.2670193C>T
chr18:g.65809865G>A
chr3:g.130735919A>G
chr3:g.100886310G>A
chr3:g.62282757C>G
chr1:g.27428933C>A
chr1:g.226881921T>C
chr7:g.151967349T>A
chr13:g.49350897C>T
chrX:g.13319871G>C
chr8:g.55523303C>T
chr4:g.48074016C>T
chr13:g.24586687G>A
chr11:g.56361097C>G
chr2:g.25749812C>G
chr3:g.121642973G>A
chr6:g.109506447G>A
chr19:g.10114657G>A
chr7:g.64979101C>A
chr6:g.43198764C>T
chr12:g.21559156C>T
chr11:g.50287692G>T
chr16:g.20475666C>A
[truncated: 8,000 more rows]

## Sheet: COAD
chr7:g.140753336A>T
chr12:g.25245350C>T
chr12:g.25245350C>A
chr3:g.179218303G>A
chr12:g.25245347C>T
chr12:g.121804752delC
chr1:g.26864366C>T
chr17:g.7675088C>T
chr5:g.112839942C>T
chr17:g.50356606delC
chr2:g.124915217C>T
chr3:g.114339156delG
chr17:g.58357800delC
chr3:g.179234297A>G
chr3:g.10292765delAA
chr10:g.844999delT
chr3:g.46375666delG
chr1:g.204259283delC
chr3:g.51380173delC
chr12:g.109581435delC
chr5:g.112838220C>T
chr19:g.47416569delC
chr11:g.64118595delTTTT
chrX:g.49882365A>G
chr3:g.179218294G>A
chr19:g.53874779T>C
chr2:g.202555407delA
chr17:g.7674220C>T
chr5:g.112780895C>T
chr2:g.147926117delA
chr12:g.25225628C>T
chr17:g.7673776G>A
chr5:g.112792446C>T
chr18:g.70326559delC
chr1:g.204954905delC
chr17:g.7673802C>T
chr7:g.54752301delAA
chr12:g.76048313delA
chr5:g.112838934C>T
chr15:g.24681944delTT
chr5:g.112840254_112840255insA
chr3:g.179199088G>A
chr17:g.7674894G>A
chr11:g.62882057delA
chr14:g.74359521delAA
chr6:g.98837683delAAA
chr17:g.9898001C>T
chr8:g.39103750delTT
chr6:g.21596270delAAA
chr12:g.25245351C>A
chr10:g.29471187delC
chr4:g.39477229delAA
chrX:g.56565441delC
chr20:g.32453753delG
chr2:g.20251481delA
chr6:g.163566663delT
chr5:g.69104133delTT
chr1:g.77933192delA
chr17:g.7673803G>A
chr7:g.35904427delTT
chr2:g.203427472delTT
chr4:g.154609910delT
chr1:g.6197725delT
chr16:g.57737164delG
chr7:g.20786861delT
chrX:g.49881931delG
chr12:g.48980565delG
chr4:g.152328232C>T
chr19:g.49347216delG
chr1:g.100540788delT
chr17:g.70178658delG
chr14:g.26597336delG
chr5:g.112827194C>T
chr17:g.7674221G>A
chr19:g.38840319delG
chr5:g.134856972delT
chr9:g.137838509delC
chr5:g.112828919C>T
chr1:g.158849431delT
chr18:g.51065549G>A
chr2:g.17517470delT
chr13:g.25098168delA
chr19:g.49654785delC
chr12:g.25245350C>G
chr1:g.67413107delTT
chrX:g.23784030delAA
chr10:g.87965537delTT
chr6:g.57054930delTTT
chr14:g.39399452delA
chr14:g.35081263T>G
chr11:g.129882601delT
chr13:g.112069446delTTT
chr12:g.122235850delC
chr2:g.27444218delT
chr2:g.124915231C>T
chr12:g.57466292delG
chr9:g.88994233delC
chrX:g.154409207delA
chr8:g.13026458delG
chr4:g.145137362delT
chr1:g.76576946_76576947insAAAC
chr7:g.32975192delC
chr1:g.244056272delA
chr22:g.17818166delG
chr5:g.80321750delT
chr7:g.120950764T>C
chr6:g.31797625delA
chr9:g.76504914delTT
chr15:g.44550901delA
chr12:g.57527219delC
chr9:g.68781747delTT
chr12:g.67312941delT
chr17:g.20204950delA
chr2:g.70088042T>A
chr15:g.37099552delTTT
chr18:g.36625553delC
chr12:g.25245351C>T
chr12:g.49040709delG
chr6:g.31541264delG
chr1:g.200857892delA
chr14:g.21488545delT
chr19:g.54636934delC
chr7:g.111125204delT
chr10:g.72893711delAA
chr1:g.235168467delA
chrX:g.130056036delC
chr15:g.40339581delC
chr4:g.25847636delT
chr20:g.1369382delAAA
chr11:g.36579547delTTTT
chr10:g.100827567delC
chr3:g.169663531C>T
chr3:g.195782770A>G
chr1:g.156745312delA
chr5:g.112792494C>T
chr13:g.50014171delA
chr8:g.112228800delA
chr16:g.20737963delAA
chr1:g.67705468delT
chr7:g.151001310delG
chr6:g.167374135delA
chr20:g.32202149delG
chr9:g.135487197delG
chr18:g.74804140delTT
chr9:g.35043653delC
chr3:g.195780140G>A
chr10:g.18675387delTT
chr1:g.155317840delA
chr6:g.80010913delA
chr5:g.141478175delA
chr18:g.58579208delT
chr10:g.69507664T>G
chr1:g.16135704delG
chr22:g.31089936delC
chr8:g.13028751delT
chr7:g.2928689delG
chr2:g.43224218delC
chr1:g.27550358delT
chr2:g.42709166delTT
chr6:g.52469410delA
chr7:g.129212163delC
chr2:g.177616647delA
chr11:g.30331207delA
chr4:g.152328233G>A
chrX:g.49881949delG
chr6:g.33301618delAAA
chr2:g.68464197delT
chr19:g.4816453delG
chr19:g.51367101delA
chr12:g.129700160delG
chr7:g.93358501delT
chr6:g.96206458delT
chr8:g.38848122delAA
chr19:g.11834130delTTT
chr10:g.69507662T>G
chr6:g.18222076delA
chr6:g.31355586delG
chr16:g.14252443delC
chr5:g.112839726C>T
chr8:g.39985731delT
chr1:g.153773997T>G
chr5:g.112838007C>T
chr21:g.31701023delG
chr5:g.135334913delT
chr2:g.229796599delA
chr19:g.53874778T>C
chr7:g.120950763T>C
chr3:g.155676138delA
chr10:g.87958013delA
chr6:g.159748482delA
chr7:g.107573863delA
chr15:g.79458244delA
chr5:g.112839816G>T
chr11:g.36579547delTTT
chr2:g.238170406delA
chr11:g.118176520delA
chr9:g.17135273delG
chr14:g.74764244delC
chr3:g.3847384delTTTTT
chr8:g.58148140delAAAA
chr13:g.109009038delT
chr6:g.96206768delT
chr14:g.55353277delTTT
chrX:g.1288808G>A
chr1:g.157697170delT
chr10:g.69507657T>G
chrX:g.100407507delG
chr4:g.13484184delG
chr20:g.59194085delG
chr16:g.31185099C>T
chr15:g.52757502A>T
chr20:g.42110363delG
chr19:g.47465746delA
chr4:g.69294915delAA
chr6:g.32838011delG
chr8:g.11332187delAA
chr14:g.74500904delG
chr1:g.12725526delT
chr14:g.47061568delT
chrX:g.71302015delTTT
chrX:g.141908542A>C
chr6:g.28534234delA
chr9:g.134154476delC
chr15:g.100898145delG
chr11:g.31790769delG
chr19:g.1430255delC
chr12:g.12121051delC
chr9:g.88995566delAA
chr1:g.26780313delC
chrX:g.64189800delC
chr2:g.218584641delT
chr20:g.23085832delC
chr4:g.44698598delA
chr17:g.75494982delC
chr19:g.52212729C>T
chr4:g.55902469delA
chr16:g.30030500delC
chr17:g.7674230C>T
chr14:g.105148144delG
chr12:g.34027041delT
chr4:g.152330755G>A
chr16:g.3300677delAA
chr1:g.151346265delG
chr1:g.70232025delT
chr4:g.152323004delC
chr18:g.2946536delT
chr10:g.76884893delT
chr5:g.173889668delA
chr11:g.96092222C>T
chr8:g.2004005delA
chr3:g.170084681delA
chr16:g.15038133delT
chr9:g.126884485delTT
chr15:g.39254337delTTT
chr14:g.94278747delTT
chr1:g.1354730delG
chr6:g.127970081delA
chr7:g.44080815delG
chr17:g.70179777delAA
chrX:g.53078024C>G
chr14:g.96294962delA
chr19:g.32678267delCC
chr8:g.27506876delT
chr21:g.34104024_34104025insC
chr4:g.139266508delTT
chr5:g.112839693C>T
chr16:g.29665058delTT
chr14:g.49623271delTT
chr8:g.61689737delAA
chr10:g.114045803T>C
chr2:g.106093959delA
chr1:g.158699742delT
chr3:g.20152526delT
chr2:g.222202093G>A
chr18:g.24165133delT
chr7:g.121331825delG
chr4:g.8088269delG
chr12:g.7089414delG
chr22:g.49889463delT
chr10:g.11948444T>A
chr3:g.12901342delG
chr1:g.119895493delT
chr4:g.159332603delA
chr15:g.89201084delA
chr1:g.210233996A>T
chr7:g.116524963delT
chr19:g.52582749delA
chr3:g.195783009C>T
chr5:g.112815564C>T
chr1:g.114713909G>T
chr20:g.58909366G>A
chr3:g.179334472delT
chr12:g.124363682delG
chr7:g.96688838delT
chr3:g.142311801delT
chr11:g.36576816delT
chr5:g.112839783G>T
chr8:g.91340519delA
chr16:g.70509137delT
chr8:g.10726136delG
chr5:g.90405764delT
chr11:g.16402762delA
chr16:g.88624733delC
chr17:g.43400345delC
chr2:g.31138133delC
chr7:g.128028550delT
chr10:g.112427453delT
chr9:g.99915230delT
chr1:g.120833687T>C
chr20:g.298859delT
chr9:g.62804060T>G
chr19:g.37885395delT
chr8:g.100573746delA
chr8:g.89955284delT
chr5:g.78039083delT
chr20:g.58160671delC
chr2:g.43225373delC
chr9:g.97938224delAA
chr2:g.66568967delTT
chr11:g.108173342delT
chr18:g.35308430A>G
chr6:g.98836345delA
chr19:g.20398920delT
chr15:g.69038886delT
chr11:g.44265074delG
chr17:g.81645291delG
chr21:g.29054251delA
chr2:g.97083988delG
chr3:g.169115469delT
chr11:g.36578381delT
chr17:g.18278231delG
chr4:g.44678557delA
chr19:g.43257849delA
chr8:g.70574792delA
chr9:g.15171912delT
chr15:g.74135478delT
chr4:g.165497672delT
chr18:g.21574789delT
chr1:g.112929268delG
chr20:g.49850764delTT
chr1:g.58480868delTT
chr17:g.47619555delAAA
chr1:g.197421298C>T
chr17:g.46171365delC
chr7:g.997675delG
chr10:g.17321322delT
chr12:g.71645001delT
chr1:g.159054953delA
chr7:g.111739578delC
chr1:g.51302241delCC
chr11:g.124881313delC
chr11:g.30012016delA
chr10:g.69507659T>G
chr4:g.155352717delT
chr12:g.55028503delT
chr19:g.16101534delT
chr11:g.105003284delT
chr5:g.77433031delA
chr5:g.134859364delT
chr3:g.101765615delT
chr1:g.94895015delT
chr4:g.150584473delCCC
chr22:g.20142999delC
chr19:g.14799602delA
chr10:g.116064257delAAA
chr11:g.380921delG
chr19:g.57134896delT
chr11:g.30011393delC
chr11:g.64265045delC
chr3:g.148742885delA
chr19:g.35732101delG
chr15:g.59084144delC
chr6:g.80042193A>G
chr8:g.66453963delT
chr3:g.132676582delA
chr14:g.23080170delC
chr15:g.28280069delT
chr3:g.25627236C>T
chr5:g.1074583delG
chr14:g.45242038delT
chr5:g.133199125delC
chr7:g.120950765T>C
chr16:g.11678760delT
chr8:g.22615811delC
chr4:g.15066234delT
chr3:g.3847384delTTTTTT
chr8:g.132814664delA
chr14:g.34862217delT
chr8:g.60865895delG
chr3:g.12604200G>A
chr5:g.65792671C>T
chr1:g.109479553delC
chrX:g.10220723delC
chr4:g.105242266delT
chrX:g.64191798G>A
chr3:g.43366832delC
chr10:g.26173831delA
chrX:g.134244845delT
chr6:g.165332943delC
chr12:g.6548808delC
chr8:g.134600671delA
chr19:g.36878624delTT
chr6:g.30653271delT
chr10:g.103603634delG
chr17:g.36943098delC
chr7:g.98304311delG
chr5:g.141216890delT
chr1:g.244843285delT
chr3:g.58501689delTT
chr3:g.41224633A>G
chr7:g.64219426delA
chr17:g.41408563delT
chr10:g.111080753delT
chr16:g.69300978delAAA
chr20:g.31644998delA
chr13:g.77901132delA
chr18:g.48040148delC
chr12:g.18081101delA
chr5:g.112839833delG
chr13:g.49359824delT
chr14:g.39276791delA
chr1:g.167773382delT
chr6:g.7987378delT
chr19:g.47694634delC
chr6:g.31958429delG
chr5:g.139307374T>A
chr1:g.18631494delA
chr12:g.51991931C>T
chr19:g.33212888delG
chr5:g.112838397_112838398insA
chr19:g.12044689delA
chr12:g.118255628delT
chr6:g.13287197T>A
chr19:g.55157638G>A
chr10:g.60068822delT
chr10:g.113165574C>T
chr1:g.16922012delC
chr19:g.52385185delA
chr19:g.49860270delG
chr3:g.179234296C>T
chr9:g.99138006C>T
chr1:g.24672417delA
chr2:g.136114845delA
chr19:g.48287012delA
chr14:g.70459544delT
chr5:g.141152906delCA
chr1:g.231351510delA
chr10:g.110133592delA
chr2:g.70964443delC
chr5:g.32786360delTT
chr2:g.9913355delT
chr1:g.18485985delAAAAA
chr8:g.37834087delG
chr14:g.73739070delG
chr1:g.155479205delT
chr5:g.37195921C>T
chr5:g.108954821delA
chrX:g.48962468_48962469insG
chr17:g.42787852delG
chr4:g.13608565delT
chr2:g.218664791delC
chr5:g.96979545delA
chr2:g.210153651delT
chr2:g.20251532delA
chr15:g.82765939delC
chr1:g.239909144delA
chr7:g.23522269delA
chr14:g.100881170delG
chr5:g.122020434_122020435insA
chr2:g.118108473C>T
chr4:g.159268049delTTT
chr17:g.46024226delA
chr15:g.20534646C>T
chr9:g.116510T>C
chr3:g.141607706delA
chr1:g.244056658delC
chr19:g.37612117delT
chr17:g.56844158delA
chr11:g.27367941G>A
chr1:g.207523628delC
chr7:g.82953628delT
chr1:g.201216043delG
chr13:g.108232110delA
chr15:g.40771256delG
chr6:g.7608991delT
chr11:g.108247071C>T
chr11:g.1000475delC
chr5:g.134960777delT
chr12:g.104082757delA
chr5:g.67004927delT
chr3:g.181713439delAA
chr1:g.87344819C>T
chr1:g.113684084delTTTT
chr12:g.7158062delC
chr8:g.26291737delC
chr6:g.10730779delA
chr3:g.25606100delT
chr11:g.78657907delA
chr1:g.88741165delA
chr17:g.65536467delC
chr10:g.47569638G>A
chr6:g.21597530T>C
chr3:g.150571959delA
chr6:g.45422618delC
chr1:g.237783900C>T
chrX:g.27747327G>A
chr5:g.24488110delT
chr7:g.105106538delA
chr12:g.57468055G>A
chr11:g.47572836delA
chr17:g.2324062delA
chr2:g.24169496delAA
chr18:g.11852614delTTTTTT
chrX:g.136232035delG
chr9:g.111932900delT
chr11:g.32439480delG
chr1:g.26779440delG
chr2:g.24169496delA
chr1:g.11992679delT
chrX:g.54444613delTT
chr8:g.13568072delT
chr11:g.33096364delT
chr5:g.103276800delA
chr8:g.132824019delA
chr12:g.107544001delC
chr12:g.130371668delT
chr10:g.13654452delG
chr19:g.49930954delC
chrX:g.64191486G>A
chr20:g.45884367T>C
chr2:g.208160853delC
chr6:g.21596270delAAAA
chr3:g.3026122delC
chr22:g.32398019delT
chr5:g.95464518delA
chr19:g.10091548delC
chr19:g.37884841A>G
chr12:g.53487174delG
chrX:g.153183523delT
chr2:g.186656358delG
chr17:g.1649830delC
chr5:g.77063142delA
chr12:g.50999216delA
chr3:g.189789735delG
chr4:g.67519218delT
chr10:g.87965537delTTT
chr18:g.48040714delC
chr18:g.11852614delTTTTT
chr2:g.5695204delAA
chr2:g.69248212delTTT
chr22:g.37807332delC
chr2:g.200572269delA
chr9:g.33464084delG
chr1:g.23971040delT
chr1:g.25563141delT
chr1:g.35113340delA
chr12:g.4613836delT
chr10:g.45964326delT
chr7:g.23702258delTT
chr6:g.21596484delC
chr7:g.138594540delA
chr5:g.55952041delT
chr4:g.152324294G>A
chr19:g.54252275delC
chr12:g.39340327delT
chr10:g.76887161A>G
chr11:g.62639702delA
chr6:g.33211213delG
chr3:g.48424076delC
chr21:g.30289462delA
chr16:g.50711488delC
chr7:g.20331826_20331827insT
chr1:g.40292750delT
chr16:g.58555436delA
chr1:g.159714547C>T
chr12:g.22478221delA
chr3:g.195783008A>G
chr15:g.43736190G>A
chr7:g.135929762delT
chr2:g.159816951delT
chr12:g.57527618delC
chr6:g.21596610delT
chr2:g.5700924delG
chr2:g.206115991delT
chr16:g.11047302delT
chr19:g.57573211delA
chr19:g.56423689G>T
chr5:g.112839519G>T
chr18:g.23601126delT
chr10:g.113141225delC
chr18:g.75289072delAAA
chr12:g.3873296delTT
chr5:g.88196101delTT
chr1:g.9582553delT
chr11:g.45934056delG
chr7:g.4801853delG
chr16:g.88438444delG
chr18:g.43277281delT
chr14:g.64568408delA
chr5:g.56923940delT
chrX:g.53078020C>G
chr5:g.38923227delA
chr11:g.5132449delA
chr1:g.46286457delA
chr2:g.96972127delG
chr5:g.130185815delT
chr19:g.57546844delA
chr1:g.114716126C>T
chr7:g.91973771delA
chr3:g.195782682A>G
chr17:g.7426369C>T
chr10:g.48446444delA
chr16:g.84976433delG
chr12:g.12821909delTT
chr12:g.63147563delA
chr5:g.112815507C>T
chr17:g.19738336delG
chr1:g.36469722delG
chr16:g.9763523delT
chr7:g.138577493C>T
chr6:g.31536669delA
chr14:g.104780214C>T
chr6:g.69713760C>T
chr14:g.89412190delG
chr12:g.56085070G>A
chr6:g.37282287delC
chr6:g.24718760delT
chr7:g.151003538delT
chr6:g.4052741delA
chr19:g.47521130delG
chr9:g.111564121delT
chr17:g.44741383C>A
chr3:g.136568813C>T
chr2:g.113595432G>A
chr8:g.56113323G>A
chrX:g.64192768delA
chr16:g.50667934delG
chr7:g.140601673G>A
chr19:g.39173273delC
chr2:g.55026092delT
chr1:g.160343409delG
chr6:g.75713700delA
chr22:g.49904343delG
chr2:g.233772515delA
chrX:g.53076553delC
chr13:g.83881637delG
chr17:g.48058426delG
chr5:g.141646589delC
chr3:g.89450213delC
chr11:g.17779393delC
chr6:g.167003333delT
chrX:g.40605859delA
chr2:g.15942192delC
chr10:g.114046474delA
chr13:g.27963141delC
chr2:g.23863456delA
chr7:g.64691907delA
chr5:g.159203635T>C
chr14:g.100734218delC
chr19:g.20125552delA
chr12:g.121580835delT
chr14:g.54430274delA
chr18:g.70327135delT
chr5:g.112828889C>T
chr5:g.72903718delT
chr4:g.169692309delA
chr7:g.117020551delTT
chr15:g.24681944delTTT
chr8:g.143804682delG
chr19:g.48391405delG
chr1:g.90916736delA
chr4:g.25414222_25414223insT
chr11:g.118532245delG
chr12:g.121999734G>A
chr20:g.20298227G>A
chr1:g.36171025delC
chr15:g.66703228delC
chr11:g.73676483delAAA
chr11:g.60393966delAAA
chr8:g.53879537delC
chr8:g.107284561delA
chr19:g.34944761delA
chr12:g.120994312delG
chr9:g.137051065delC
chrX:g.93710994delT
chrX:g.41347847delT
chrX:g.153804632delC
chr12:g.1946096delT
chr19:g.2877781C>T
chr11:g.22822973delT
chr1:g.156673012delG
chr2:g.43794342delT
chr12:g.88130302delT
chr5:g.179033039G>A
chr16:g.568994delG
chr1:g.149913429delC
chr4:g.37445757delT
chr18:g.724268delA
chr3:g.130388903delA
chr3:g.50062017delA
chr10:g.101002836delC
chr6:g.39540081G>A
chr13:g.29025422C>T
chr9:g.126834019delAAA
chr8:g.54626253delA
chr5:g.112838399C>A
chr10:g.21518541delAAAA
chr14:g.76762828delG
chr19:g.35866312delC
chr5:g.177311406_177311407insG
chr20:g.37733014delA
chr1:g.26574432delT
chr1:g.56691421delT
chr17:g.40396390delT
chr8:g.22069041delC
chr19:g.19110944delG
chr21:g.40012966delA
chr16:g.1220496delC
chrX:g.71170200C>T
chr3:g.74264350delT
chr19:g.13772154delC
chr19:g.2514988G>A
chr2:g.188734534delA
chr5:g.112838415G>T
chrX:g.49882359A>G
chr11:g.63311104delA
chr14:g.101809869delTT
chr5:g.123023773delAAA
chr10:g.72893711delA
chr5:g.13766130delG
chr17:g.4539348A>T
chr2:g.1504037G>A
chr8:g.47673653C>T
chr16:g.57154202delT
chr7:g.137466918C>T
chr16:g.90010057delT
chrX:g.7259595delT
chr22:g.29312284delG
chr12:g.39311627delT
chr15:g.51488087delA
chrX:g.41229782delA
chr12:g.34026373delT
chr17:g.10319135C>T
chr6:g.28329386G>A
chr12:g.33439548delT
chr9:g.106932397delG
chr2:g.61405885delT
chr14:g.35535851delT
chr1:g.235343551delA
chr7:g.21900051delA
chr3:g.48459889delC
chr10:g.113902549delA
chr21:g.46326506G>A
chr6:g.30915830G>A
chrX:g.153765477_153765478insC
chr3:g.49843896C>T
chr11:g.112082420delT
chr10:g.45757132delA
chr5:g.13920607C>T
chr1:g.153390129delT
chr11:g.129944905delG
chr5:g.94714873delT
chr12:g.132673703C>A
chr4:g.190025884G>A
chr7:g.150857033delC
chr6:g.96209882delC
chr16:g.3286043C>T
chr11:g.111297691C>T
chr12:g.25227343G>T
chr2:g.96021409delC
chr4:g.38689855delC
chr8:g.123787317G>A
chr3:g.179230348G>A
chr7:g.76285867delC
chr2:g.214980586C>T
chr9:g.126881952delT
chr3:g.57457919delT
chr16:g.71536690delA
chr10:g.62399754delA
chr19:g.44759623delG
chr5:g.82275994delG
chr10:g.59654422delT
chr16:g.30510924delG
chr2:g.5697845G>A
chrX:g.1382671delTTT
chr16:g.30965996delC
chr5:g.128290765delC
chr18:g.31343816delTT
chr4:g.17526959C>T
chr5:g.141332916C>T
chr10:g.92483288delA
chr3:g.187725557C>T
chr11:g.63546237delA
chr5:g.115616039delA
chr15:g.24681944T>C
chr22:g.44809279delTT
chr19:g.10833274delA
chr5:g.141388864C>T
chr12:g.45065301G>A
chr3:g.179210192T>C
chr12:g.49033896C>T
chr19:g.55817946G>A
chrX:g.109663401G>A
chr2:g.176100531delG
chr4:g.99949515delC
chr17:g.67948150delA
chr7:g.144399097delG
chr11:g.5255010delT
chr6:g.38857573G>A
chr1:g.156907715delC
chr15:g.82328177delC
chr18:g.31067962delT
chr12:g.117177607delT
chr4:g.72311099C>T
chr8:g.72938199delA
chr10:g.85602612C>T
chr15:g.33772042G>A
chr13:g.48515256delT
chr3:g.151432894delT
chrX:g.102937456delG
chr9:g.103005257delA
chr1:g.206965831_206965832insT
chr11:g.66068764delT
chr12:g.57128897delG
chr4:g.176192760C>T
chr1:g.181049121C>T
chr3:g.3845139delA
chr2:g.231066966delA
chr20:g.61719191delTT
chr1:g.28769128delA
chr11:g.970195delA
chr19:g.48509499delG
chr19:g.13286524delG
chr18:g.5892002delG
chr4:g.684782delG
chr3:g.154280586delT
chr11:g.107504605delT
chrX:g.30237306delAA
chr12:g.55365407_55365408insT
chr17:g.41835221G>A
chr1:g.117626294_117626295insC
chr5:g.169689268C>T
chr6:g.83524499G>A
chr17:g.45151307delAA
chr2:g.151464027delA
chr11:g.121157947C>T
chr5:g.11117459G>A
chr3:g.68544712delA
chr12:g.84886011delA
chr11:g.64804621delG
chr3:g.185923991delAA
chr1:g.152759954C>T
chr1:g.192810239delA
chr2:g.107890786C>T
chr19:g.41761474_41761475insG
chr6:g.44253710delT
chr4:g.184009626_184009627insA
chr19:g.50323073delC
chr11:g.400077delC
chr2:g.237366876delC
chr11:g.1881556delC
chrX:g.150649810_150649811insA
chrX:g.154460225delG
chr3:g.160677306A>G
chr18:g.55228289delG
chr21:g.41991751C>T
chr6:g.116437396delAA
chr14:g.20378179delC
chr7:g.139371433delA
chr7:g.94910277delG
chr10:g.79513976C>T
chr17:g.1659937C>T
chr15:g.25713881C>T
chr17:g.7674945G>A
chr2:g.209710113C>T
chr9:g.37034104T>C
chr6:g.152148216G>A
chr3:g.169840017delT
chr1:g.169821726delT
chr16:g.29665058delTTT
chr8:g.144464276delC
chr7:g.152148439delA
chr1:g.153933653delG
chr7:g.107594095delT
chr17:g.72123621_72123622insG
chr19:g.43593257C>T
chr7:g.41965975delG
chrX:g.85271614_85271615insA
chr15:g.61964716delT
chr5:g.141246519C>T
chr1:g.237566672C>T
chr8:g.76853065T>A
chr9:g.20413954delT
chr17:g.41612492delC
chr7:g.128457910delAA
chr17:g.40089537delC
chr19:g.55303668delC
chr5:g.141152906_141152907insA
chr19:g.42081479_42081480insC
chr19:g.42357575delC
chr10:g.122084841delC
chr3:g.58104061delG
chr14:g.69770393delT
chr6:g.161048797delA
chr10:g.35211615delA
chr14:g.21088033delC
chr19:g.6694564delG
chr3:g.193364229C>T
chr9:g.41648141T>A
chr6:g.84185327G>A
chr12:g.12477384G>A
chr22:g.39491058delC
chr3:g.179218304A>C
chr12:g.22249013G>A
chr17:g.4782532C>T
chr8:g.143652451delT
chr8:g.66429266delC
chr21:g.32268942T>C
chr20:g.18183220G>A
chr18:g.51065548C>T
chr4:g.106924045C>T
chr1:g.84532967delA
chr2:g.120221955delG
chr12:g.100220021delT
chr4:g.56930584delA
chr3:g.126343667delA
chr9:g.95516693C>T
chr4:g.15580046C>T
chr20:g.145658C>T
chr2:g.28025406delA
chr4:g.71029561delT
chr2:g.70088042T>C
chr19:g.45052871delC
chr11:g.47286515G>A
chr1:g.161041734delC
chr6:g.107070398delC
chr6:g.99401466_99401467insT
chr22:g.29439340delA
chr5:g.141666468delG
chr3:g.57452941G>A
chr21:g.32762153G>A
chr10:g.95376000G>T
chr3:g.109099393delA
chr11:g.111497122delT
chr16:g.22251285delG
chr5:g.161326369G>A
chr14:g.54843628delA
chr3:g.129571847delG
chr18:g.80136378delC
chr12:g.109509536delT
chr2:g.88804443G>A
chr3:g.33213967G>A
chr5:g.112839474C>T
chr17:g.9959306delT
chr6:g.116515791delT
chr8:g.22615462delC
chr11:g.10768372C>T
chr2:g.105881461C>T
chr11:g.20630783G>A
chr20:g.63946478C>T
chr9:g.126835433delT
chr16:g.27497688delT
chr21:g.21538007C>T
chr19:g.3816722C>T
chr17:g.7832920delC
chr9:g.92976618delC
chr2:g.124915197C>T
chr6:g.139167010delG
chr2:g.27054746G>A
chr17:g.74593183C>T
chr3:g.149172353C>T
chr15:g.75207463delC
chr6:g.63279887delAA
chr17:g.16427521delG
chr14:g.101563276delG
chr16:g.3436729G>A
chr6:g.130440608delT
chr12:g.120576720C>T
chr16:g.29668845delAAA
chr1:g.26771131delA
chr17:g.30784104delT
chr14:g.103657746delA
chr12:g.120996564delC
chr17:g.28741978delC
chr21:g.10577491G>A
chr10:g.115127671delT
chr19:g.12350927delA
chr1:g.197084205delT
chr12:g.67661098delTTT
chr8:g.66840004delT
chr17:g.78675940delA
chr11:g.32440050delA
chr15:g.72162341C>T
chr6:g.26158144A>G
chr12:g.6592417C>T
chr17:g.32488677delT
chr1:g.154331677C>T
chr1:g.92703443delA
chr20:g.59028741delTT
chr20:g.32435242_32435243insC
chr1:g.25498542delA
chr5:g.147671844C>A
chr17:g.79090833_79090834insT
chr1:g.66924743delT
chr17:g.44400999_44401000insT
chr8:g.25296571G>A
chr1:g.74370396delT
chr16:g.15408143delT
chr19:g.16929074delC
chr6:g.155276438delA
chr4:g.56315466delG
chr6:g.151351865delC
chrX:g.57594804delT
chr4:g.99061397delT
chr3:g.179221146G>A
chr5:g.112838134delA
chr18:g.14848778delA
chr1:g.248203771G>A
chr6:g.35586848delTTT
chr1:g.204618701delG
chr4:g.140911316G>A
chr19:g.5668370delT
chr5:g.138511407C>T
chr1:g.5863476C>T
chr4:g.95840741G>A
chr13:g.27945509A>G
chr5:g.24487550delA
chr2:g.36981492delA
chr12:g.6347878_6347879insC
chr5:g.55164285delTT
chr9:g.104123220delA
chr2:g.238344505G>T
chr3:g.172506348C>G
chr14:g.104707848delC
chr8:g.8703673delT
chr6:g.21598062delT
chr6:g.55174613delC
chr6:g.49618107G>T
chr10:g.62806687delT
chr6:g.29609366_29609367insG
chr4:g.152326137G>A
chr8:g.76705102delA
chr12:g.56712516delA
chr5:g.14487510C>G
chrX:g.57910513delA
chr5:g.81201390C>T
chr16:g.67828184delG
chr9:g.14088142delT
chr11:g.115176389G>A
chr5:g.53485766A>T
chr2:g.231712877delAAA
chrX:g.96957917G>A
chr18:g.68897418delA
chr8:g.32595993delA
chr9:g.129810350delT
chr11:g.76194623delT
chr7:g.23254184C>T
chr16:g.71853250delC
chr18:g.14803799C>T
chr5:g.112839627G>T
chr7:g.4017208C>T
chr19:g.12628688delA
chr5:g.112839810C>T
chr21:g.41168562delC
chr6:g.118275546G>A
chr5:g.141101357C>T
chr1:g.76313962G>A
chr16:g.66851548delT
chr4:g.184629245delA
chr18:g.23531717delT
chr6:g.46223067delT
chr2:g.55881630G>A
chr18:g.75289497delA
chr12:g.57631320delC
chr1:g.155480736delT
chr9:g.97363682C>T
chr5:g.52918746C>T
chr11:g.112033459delA
chr16:g.3023265delG
chr10:g.47468753delC
chr19:g.55096094delC
chr1:g.43404442C>T
chr10:g.101068114delA
chr2:g.23875886delT
chr18:g.21828871delTT
chr7:g.50463377delT
chr5:g.83512433delA
chr4:g.169001831delT
chr19:g.50416609delG
chr18:g.34794151delT
chrX:g.71302015delTT
chr1:g.1180843delG
chr1:g.117625613delT
chr8:g.61499736delT
chr15:g.68187948delT
chr2:g.147899472delA
chr2:g.9849442delAAA
chr19:g.49464467C>T
chr8:g.94519335delA
chr16:g.20963874G>A
chr22:g.24919986C>A
chr13:g.110638338G>A
chr13:g.37563179delA
chr10:g.132690427delA
chr1:g.110340251delC
chr2:g.161179654C>T
chr15:g.100132007delG
chr4:g.155843691C>T
chr7:g.107475113delT
chr2:g.205301574delA
chr7:g.134960153delT
chr18:g.45879178delA
chr17:g.40020297G>A
chr1:g.207022092G>A
chr3:g.36738333delG
chr10:g.23442067delT
chr3:g.179199148G>A
chr1:g.8013868C>T
chr14:g.20460269delT
chr2:g.18583932G>A
chr3:g.179401059delT
chr11:g.112082565delA
chr6:g.157942905delT
chr6:g.116916209delT
chrX:g.41474324G>A
chr2:g.80302816C>T
chr9:g.35091696delG
chr17:g.44405979_44405980insT
chr19:g.11021761C>T
chr15:g.23567536delT
chr6:g.155252953G>A
chr1:g.179852701delT
chr8:g.98102897C>T
chr1:g.64841314delT
chr14:g.46651765G>A
chr5:g.141179292G>A
chr2:g.130075290delG
chr10:g.113721773delA
chr1:g.31652558delAC
chr17:g.55043773delA
chr6:g.31534531delT
chr5:g.141102203G>A
chr13:g.102732943C>T
chr2:g.218137112delA
chr20:g.13782846delT
chr5:g.179132312delT
chr5:g.86617977delA
chr16:g.3402111delA
chr17:g.38552018delG
chr19:g.17725972delC
chr17:g.66062964delT
chr7:g.117363451delA
chr1:g.202331758delA
chrX:g.73004371delTCTC
chr1:g.68481942delA
chrX:g.80929822delA
chr18:g.42743667delA
chr12:g.24583628delA
chr7:g.126533224delG
chr9:g.132883972C>T
chr11:g.134251287C>T
chr15:g.65500707C>T
chr22:g.27800415delC
chr12:g.49631475delC
chr9:g.101476798delG
chr2:g.29064853delC
chr4:g.163613456delT
chr2:g.169604071delT
chrX:g.93711184_93711185insT
chr2:g.231712906A>G
chr10:g.49933618delT
chr2:g.159872353delT
chr1:g.160371891delAA
chr2:g.65129940A>G
chr19:g.4653007delA
chr3:g.69055326delA
chr5:g.174729216G>A
chr2:g.102372053T>A
chr7:g.20681557G>A
chr14:g.90184941delG
chr19:g.50713898C>T
chr8:g.144547991delG
chr11:g.124869527delC
chr6:g.13205903delG
chr4:g.143521553G>A
chr1:g.77875178delA
chr9:g.68781493delA
chr3:g.41224646C>T
chr16:g.19439963delAAA
chrX:g.111744774T>A
chr17:g.2324001delT
chr2:g.172063916delT
chr14:g.23571227delC
chrX:g.40651709delA
chr16:g.50791608delA
chr13:g.20631041delA
chr8:g.109464660G>A
chr18:g.3164281G>A
chr11:g.118902389delG
chr21:g.46314785delG
chr4:g.152323033G>A
chr19:g.8087849G>A
chr17:g.75504988delG
chr5:g.140795532G>A
chr1:g.101240198delA
chr15:g.79297385delT
chr10:g.42519364delA
chr2:g.156328517delT
chr3:g.121520086delA
chr17:g.7673704G>A
chr16:g.53229088delT
chr13:g.36231153delAA
chrX:g.135906500C>T
chr3:g.38581135delG
chr7:g.128847704G>A
chr3:g.128463874delT
chr22:g.50460327delG
chr17:g.7895447delC
chr17:g.30178149delA
chr2:g.98625493delA
chr15:g.54627063G>T
chr7:g.92200682delA
chr5:g.112839978_112839979insAG
chr17:g.17796045delC
chr22:g.15699881delTTTT
chr7:g.107924329delT
chr16:g.55846332G>A
chr17:g.79794849delC
chr7:g.105462682G>A
chr6:g.152367294G>A
chr9:g.138219422G>A
chr17:g.44080433delG
chr20:g.2617152C>T
chr5:g.83512446C>T
chr19:g.40209173delC
chr20:g.35620881delC
chr17:g.42210428_42210429insT
chr5:g.34850212C>T
chr5:g.141955800delG
chr10:g.49611196C>T
chr5:g.96423363C>T
chr3:g.138318192C>T
chr14:g.20311393delT
chr5:g.180947580delT
chr16:g.3767720delT
chr19:g.4529267delC
chr6:g.110424914delT
chr9:g.97675352delTT
chr8:g.79765059delA
chr6:g.34871592delC
chr8:g.142613965C>T
chr4:g.54263751G>A
chr2:g.214781251delT
chrX:g.47567016delC
chr16:g.61655510G>A
chr12:g.124014399delT
chr12:g.121823338delC
chr3:g.54562913delT
chr18:g.47841840G>T
chr18:g.33740022delA
chr15:g.68714582C>T
chr2:g.86105942delG
chr17:g.58602546_58602547insT
chr6:g.70862002A>G
chr10:g.94358187T>C
chr7:g.4790814delC
chr5:g.172090341delT
chr2:g.38017246G>A
chr14:g.64541257delG
chr20:g.38225721C>T
chr17:g.45151307delAAA
chr22:g.32193345delC
chr3:g.112204376delA
chr6:g.10557177delC
chr14:g.49751674delA
chr17:g.39511531G>A
chr10:g.3107226delA
chr6:g.73641867delA
chr11:g.66287634delG
chr18:g.58579709delA
chr7:g.138759819C>T
chr13:g.23335159C>T
chr17:g.63420533delC
chr2:g.189805814delAA
chr4:g.272048C>A
chr6:g.29673582delA
chr11:g.59195354delC
chr15:g.34794767G>A
chr1:g.149923670delG
chr17:g.35986601C>T
chr2:g.5700421delAAAAA
chr4:g.73576100delT
chr19:g.19712398G>A
chr15:g.65388902delG
chr11:g.6270748C>T
chr6:g.39304505delC
chr17:g.40922859delA
chr7:g.138852241delG
chr7:g.73341321C>T
chr19:g.37413251C>A
chr2:g.237387921C>T
chr17:g.7592804delG
chr19:g.12431270C>A
chr20:g.62857535G>A
chr11:g.62981862delA
chr21:g.39187063delA
chr1:g.160372048delC
chr9:g.127311722delT
chr6:g.145954827_145954828insT
chr7:g.27992005delT
chr2:g.162170837delT
chr1:g.34785265delC
chr1:g.27294617delG
chr10:g.18545966delA
chr1:g.151801557delG
chr1:g.156595712delT
chr4:g.152322940G>A
chr3:g.179234219A>G
chr17:g.41982380delT
chr14:g.35535850_35535851insT
chr6:g.160064456delG
chr16:g.31362665delC
chr12:g.67660362delAA
chr14:g.88468080delT
chr13:g.36827811delT
chr9:g.126834019delAA
chr11:g.66341243delC
chr9:g.99137889C>T
chrX:g.64192215G>A
chrX:g.156022062G>A
chr1:g.53464771delC
chr19:g.52614755delT
chr12:g.50858932delA
chr3:g.27720212delC
chr5:g.98872313delT
chr19:g.50689302delG
chr6:g.63711817G>T
chr19:g.57874504G>T
chr14:g.56804331delG
chrX:g.107603250G>A
chr11:g.76459869delT
chr1:g.114680439C>T
chr4:g.183315820delT
chr17:g.4972443delG
chr2:g.53866208delT
chr11:g.124626894delT
chr12:g.122855584delC
chr10:g.114046741delT
chr4:g.62044487G>A
chr8:g.76855976C>T
chr6:g.26017789delA
chr8:g.144095973delC
chr1:g.74182697delT
chr16:g.81017800C>T
chr1:g.233252767delT
chr7:g.73593998G>C
chr5:g.112842303C>T
chr10:g.84219202G>A
chr20:g.64207872G>A
chr3:g.151328354delT
chr2:g.32617878G>T
chrX:g.9932481G>A
chr4:g.65404391G>A
chr22:g.41436242delT
chr4:g.133163253C>T
chr12:g.51912371delA
chr8:g.58148175T>G
chr10:g.18539747T>C
chr14:g.24428849delG
chr17:g.7675137C>G
chr4:g.42086237delT
chr20:g.49636246delA
chr6:g.135197200delA
chr1:g.237890623G>A
chr7:g.6046109delT
chr1:g.94892376delT
chr17:g.68887063C>T
chr2:g.99163149delA
chr5:g.56923914C>T
chr14:g.49896085delA
chr6:g.85565362delA
chr20:g.36786494delG
chr22:g.39743868C>A
chr1:g.54404621delT
chr14:g.72674308delC
chr10:g.88922389delA
chr12:g.4613835_4613836insT
chr2:g.206311212G>A
chr5:g.138167807delA
chr8:g.85202226delA
chr7:g.90303973delA
chr5:g.110605204delT
chr13:g.52474899delA
chr22:g.49884031delT
chr3:g.125020902G>A
chr5:g.138904403C>T
chr16:g.68801878delC
chr13:g.49631423A>G
chr14:g.58646177delC
chr3:g.127016548delC
chr17:g.4539349A>T
chr4:g.122362306delT
chr17:g.13601200delC
chr9:g.37442165delG
chrX:g.19542097delG
chr19:g.55733040delT
chr7:g.134442667delA
chr8:g.61499736delTT
chr6:g.161048744delA
chr15:g.49371394C>T
chr1:g.215620580delA
chr1:g.203175742delT
chr3:g.49896810delC
chr14:g.76154327delT
chr12:g.29341018delT
chrX:g.11298862G>A
chr1:g.168085631delC
chrX:g.103274193G>A
chr5:g.82276060delT
chr11:g.68750404delC
chr19:g.18777183delC
chr10:g.91855629C>T
chr3:g.153164499delT
chr3:g.143056370delA
chr10:g.62813508C>T
chr5:g.87389331_87389332insA
chr11:g.43897900delA
chr3:g.9734336C>T
chr1:g.186320416G>A
chr6:g.33412273delC
chr12:g.85056257delA
chr1:g.42887527delC
chr14:g.53073850delA
chr8:g.100703273delT
chr1:g.153944377delC
chr3:g.120602189delT
chr8:g.21693172delT
chr22:g.47111550G>A
chr15:g.25862857G>A
chr2:g.189818084delA
chr9:g.71685161delT
chr2:g.210314977C>T
chr10:g.123136111delC
chr3:g.38554304G>A
chr21:g.34526884delA
chr7:g.101198281delC
chr3:g.195782311G>T
chr2:g.152656192delT
chr2:g.130181854delC
chr3:g.26710267delA
chr14:g.23348215G>A
chr5:g.13830731delC
chr9:g.34088276delA
chr5:g.100380135G>A
chr8:g.98156240delA
chr5:g.134115989delC
chr22:g.32859337delC
chr9:g.95447311delG
chr17:g.61408225C>T
chr2:g.55573693delT
chr20:g.31606477delT
chr10:g.27263192G>A
chr11:g.18934225delA
chr8:g.25432562delT
chr20:g.2403480delC
chr7:g.26206369delA
chr22:g.39080141delC
chr12:g.124014582_124014583insG
chr14:g.90404785_90404786insA
chr8:g.144501644delC
chr14:g.51704908C>T
chr17:g.18525515C>T
chr15:g.84857036delA
chr8:g.103819491A>G
chrX:g.32448529delT
chr12:g.57096672delC
chr14:g.20992723delTT
chr4:g.68314042delAA
chr14:g.55353277delTTTT
chr20:g.62799721delC
chr12:g.18683201C>T
chr12:g.101666684G>A
chr22:g.46535330delC
chr2:g.1649188delG
chr4:g.1252092delA
chr14:g.72671054delA
chr9:g.133071666G>C
chr17:g.78050899delA
chr4:g.4283731delA
chr20:g.32434639delG
chr5:g.32088970delA
chr19:g.37888081C>A
chr4:g.102268068delT
chr8:g.38428346G>A
chr2:g.182720158G>A
chr11:g.7695643G>A
chr11:g.66838412G>A
chr3:g.42908691delT
chr2:g.37179569G>A
chr12:g.9979320delT
chr19:g.42293224delC
chr19:g.53874782T>C
chr15:g.34152795delA
chr3:g.7578942G>A
chr1:g.84554885delT
chr5:g.80321749_80321750insT
chr16:g.19706831delA
chr2:g.206124092delT
chr12:g.117539800delG
chr6:g.83110219C>T
chr5:g.112839465C>T
chr19:g.34219423C>T
chr5:g.112840059delT
chr15:g.55329723_55329724insT
chr20:g.46501953T>C
chr11:g.4848734G>A
chr7:g.92062328delA
chr4:g.37445730G>A
chr19:g.37611719delA
chrX:g.153455569C>T
chr17:g.19826139_19826140insT
chr17:g.75818721delC
chr3:g.121490352C>T
chr17:g.34983467delA
chr11:g.56663991delT
chr1:g.53077705delC
chr2:g.218643361delC
chr17:g.81645298C>G
chr1:g.17408885delA
chr8:g.84529478G>A
chr7:g.95268633C>T
chr19:g.50437518G>A
chr16:g.30397989delC
chr22:g.19852227C>T
chr5:g.7867655_7867656insT
chr10:g.79904947delT
chr1:g.74570359A>G
chr19:g.4552585delG
chr15:g.85091129delA
chr12:g.54241649delT
chr6:g.21597532T>C
chr2:g.130767058C>T
chr5:g.37752630delT
chr11:g.43449938C>T
chr19:g.45821366delG
chr2:g.212538530delT
chr1:g.85706306G>A
chr17:g.79735246G>A
chr13:g.113549814delTTT
chr5:g.112839714G>T
chrX:g.155780502delT
chr16:g.87833014C>T
chr1:g.241795210C>T
chr17:g.82442422delG
chr17:g.7675089G>A
chr1:g.244055732delTT
chr2:g.226796948delC
chr6:g.145919407G>A
chr4:g.20256705G>A
chr3:g.195783086A>G
chr17:g.58982991delA
chr7:g.96039298C>A
chr5:g.112835166G>A
chr7:g.149810971delC
chr1:g.180274376G>A
chr17:g.17143572delC
chr6:g.50823539delC
chr2:g.61488232C>T
chr1:g.204122380delC
chr17:g.4539350A>T
chr19:g.40765176delC
chr3:g.179204513G>A
chr7:g.6751496delA
chr6:g.36213952delC
chr2:g.19896817delA
chr1:g.150558030delG
chr8:g.100002250delT
chr19:g.1430254_1430255insC
chrX:g.5893513C>T
chr8:g.30846000delT
chr6:g.87015992C>T
chr10:g.11870854delA
chr15:g.99712543G>A
chr13:g.46142331C>T
chr9:g.84003926A>T
chr6:g.10801909G>A
chr5:g.180631748delG
chrX:g.145824100G>A
chr9:g.137101096delG
chr17:g.30248824delT
chr2:g.29156367delA
chr19:g.38572138C>T
chr19:g.10156448C>T
chrX:g.341317delT
chr20:g.63247581G>A
chr1:g.214369667G>A
chr1:g.15719900C>T
chr11:g.95070381A>G
chr16:g.84976439delC
chr2:g.70088048T>C
chr17:g.27582990delC
chr10:g.15056974delT
chr1:g.240493391C>T
chrX:g.21656928delC
chr5:g.32791578G>A
chr7:g.102348650G>C
chr16:g.28984906delG
chr3:g.189894239C>T
chr10:g.60071532delT
chr19:g.43847583delT
chr15:g.28838741delA
chr13:g.50014362C>T
chr11:g.134178691delG
chr4:g.39082097C>T
chr12:g.2858922delG
chr2:g.227981594delT
chr3:g.153165693delTT
chr2:g.1209219G>A
chr10:g.79386312delG
chrX:g.49882360A>G
chr11:g.78121147delT
chr17:g.16382471delC
chr7:g.94668389delT
chr3:g.58170713delG
chr1:g.114673108delT
chr10:g.99235629C>A
chr2:g.60461834delG
chr14:g.55350743delA
chr6:g.32976700C>T
chr5:g.112839879C>T
chr13:g.83881669delC
chr21:g.36930346C>T
chr6:g.98837442delA
chr10:g.96533164delA
chr9:g.97374551delC
chr13:g.49631426G>A
chr19:g.18431355delC
chr9:g.121152463delT
chr12:g.107692981delT
chr12:g.57449776C>T
chr2:g.232920449C>T
chrX:g.37009004delC
chr14:g.24150600delG
chr7:g.4113396C>T
chr18:g.57436268C>G
chr4:g.152960754C>T
chr6:g.106652328C>T
chr7:g.150861171delC
chr1:g.156914691delC
chr15:g.74136738delC
chr4:g.140967735G>A
chr14:g.64804983G>A
chr5:g.14487672delC
chr22:g.40799054delA
chr19:g.49829856delC
chr12:g.8513675delA
chr1:g.179996755C>T
chr9:g.100300652_100300653insA
chr15:g.81003789delTTT
chr14:g.32939299delA
chr19:g.53734949C>T
chr6:g.73369285G>A
chr16:g.31423943C>T
chr10:g.117254391C>A
chr3:g.140682618C>T
chr3:g.121857149C>T
chr9:g.72250585delT
chr12:g.21773253_21773254insCA
chr3:g.150703738T>A
chrX:g.38369854G>A
chr17:g.50750520_50750521insA
chr2:g.158680801delT
chr3:g.38907950delT
chr22:g.21445576delG
chr7:g.103119676delA
chr1:g.15932985delC
chr5:g.98870705delT
chrX:g.73004389T>C
chr12:g.6936026delC
chr15:g.48152148delT
chr19:g.53259535G>A
chr2:g.202037488C>T
chr16:g.88599796delA
chr2:g.130916649G>A
chr19:g.39328885delAAC
chr9:g.81992581G>A
chr1:g.147620760C>T
chr2:g.88801283delA
chr19:g.39705881C>T
chr8:g.17230642C>T
chr4:g.6084934C>T
chr8:g.48735198C>T
chr7:g.149848298delG
chr5:g.119632843G>A
chr2:g.187385548delA
chr2:g.127704420delA
chr22:g.16602174G>A
chr14:g.100883673G>A
chr16:g.50781269G>A
chr3:g.46375665_46375666insG
chr3:g.193301250G>A
chr6:g.1394746G>T
chr8:g.133133520delC
chr19:g.50415793C>T
chr9:g.81947752G>T
chr8:g.23293343G>A
chr16:g.75656660delA
chr7:g.44538974delG
chr2:g.229447360G>A
chr2:g.86620416C>T
chr18:g.37270830delG
chr1:g.169593620G>A
chr16:g.31436933G>A
chr6:g.100393695C>T
chr14:g.104947978C>T
chr9:g.114162714delG
chr16:g.84195112C>T
chr17:g.38740321C>T
chr19:g.49048876delG
chr2:g.58086357G>A
chr12:g.90953843C>T
chr2:g.236582321delT
chr7:g.106022270G>A
chr2:g.178597605G>A
chr19:g.17821347C>T
chr10:g.132922215_132922216insT
chr2:g.48582060delA
chr14:g.50986101C>T
chr19:g.12391776delA
chr14:g.75654920G>A
chr6:g.37013758G>A
chr7:g.680644delG
chr2:g.229025701G>A
chr17:g.28759240delG
chr13:g.24889388G>A
chr4:g.157336555delT
chr8:g.96160709C>T
chr1:g.6128887G>A
chr20:g.25012877G>A
chr18:g.46821025G>A
chr4:g.183694727delT
chr2:g.105343021C>T
chr16:g.47128484G>A
chr5:g.83353294C>A
chr17:g.42210429delT
chr7:g.93215562delT
chr11:g.55886134delA
chr17:g.72122813C>T
chr2:g.151870549C>T
chr3:g.38847592G>A
chrX:g.69505825C>T
chr19:g.39464839G>T
chr16:g.31379572G>A
chr2:g.233511716G>A
chr2:g.185805423G>T
chr5:g.180620665C>T
chr9:g.81991728delA
chr2:g.42682407G>A
chr6:g.56642724C>T
chr19:g.19891906G>T
chr14:g.94378273G>A
chrX:g.135051659delG
chr3:g.44734511C>A
chr7:g.34055250C>T
chr19:g.9188100delTT
chr2:g.209839222C>T
chr1:g.235155106G>A
chr7:g.122086120delA
chr14:g.35536350delT
chr1:g.69678445C>T
chr13:g.23355574C>T
chr18:g.120869delT
chr17:g.4900930C>T
chr1:g.159943055_159943056insG
chr1:g.229326757G>A
chr7:g.37916225G>A
chr13:g.61413297G>A
chrX:g.108221371G>A
chr3:g.37326567G>T
chr6:g.32950642C>T
chr20:g.43726332delA
chr8:g.41708865C>T
chr6:g.53654961delT
chr3:g.183338826G>A
chr18:g.8253304G>A
chr3:g.136521366G>A
chr17:g.30092021C>A
chr14:g.39247328C>T
chr7:g.141714356delA
chr11:g.120240309delG
chr3:g.50275435C>T
chr3:g.53855320delA
chrX:g.91879310delT
chr6:g.152331739C>A
chr12:g.67661109T>C
chr8:g.22194802C>T
chr6:g.160453502G>A
chr9:g.115046477G>A
chr8:g.94526896C>T
chr1:g.210464606G>A
chr7:g.98625072G>A
chr10:g.12035224delT
chr4:g.133152723C>T
chr10:g.73634639C>T
chr2:g.29072535delG
chr19:g.53807550delC
chr2:g.119977162delAA
chr5:g.96393078delA
chr5:g.141431474G>A
chr4:g.119027429C>T
chr1:g.214384141G>A
chr2:g.169650372delT
chr14:g.96565020G>T
chr5:g.140852886delTT
chr6:g.111702966G>A
chr17:g.48051597delC
chr15:g.64816176delA
chr9:g.19528056G>A
chr21:g.39661870C>T
chr6:g.168075830C>T
chr7:g.124746593C>T
chr7:g.144365132G>A
chr19:g.39026990G>A
chr6:g.30642937delC
chr2:g.240139256delG
chr11:g.60715035G>A
chr16:g.35170162C>T
chr19:g.49597545G>T
chr19:g.14662054G>A
chr1:g.117115616C>T
chr13:g.99501755delA
chr17:g.68250175delT
chr8:g.26363756delT
chr5:g.43161304delA
chr12:g.130371647delT
chr3:g.119458115delA
chr4:g.2938681delT
chr10:g.15061849delT
chr19:g.37347829G>A
chr4:g.3428512C>T
chr6:g.96204341T>G
chr1:g.11020527C>T
chr2:g.168889507C>T
chr16:g.80633110C>T
chr6:g.37655759C>T
chr3:g.126418654C>T
chr12:g.122200799delC
chr5:g.140883930C>T
chr10:g.98459671C>T
chr22:g.43530832C>T
chr3:g.195782483C>T
chr1:g.204984040G>A
chr19:g.32677839G>C
chr5:g.178120583delC
chr1:g.175386099G>A
chr2:g.73453547G>A
chr6:g.166330178C>T
chr6:g.111177560delA
chr5:g.100586276delG
chr19:g.42290289delC
chr11:g.33661013C>T
chr16:g.20324229G>A
chr16:g.71475354C>A
chr17:g.10319175C>T
chr10:g.96396008delC
chr19:g.21293329T>C
chr10:g.96160158G>A
chr5:g.175683299C>T
chr2:g.112185235delC
chr1:g.64812789C>T
chr2:g.143970732delA
chr2:g.177538214delA
chr11:g.88335066delT
chr22:g.23096301delG
chr8:g.70052279C>T
chr19:g.6466879delC
chr17:g.81588992G>A
chr1:g.203852221T>C
chr15:g.54013448G>A
chr15:g.75961873G>A
chr2:g.3695732G>A
chr2:g.85322658delA
chr3:g.89210327G>A
chr19:g.50511603delG
chr2:g.106806721G>A
chr1:g.207567828C>A
chr11:g.4653334C>T
chr5:g.38959903C>T
chr4:g.3493243delC
chr6:g.71887072delC
chr22:g.16784254G>A
chr6:g.73408009delA
chr22:g.16807898C>T
chr14:g.76809590delG
chr1:g.113757716C>T
chr4:g.102030160delA
chr3:g.113658636T>G
chr17:g.50190354delG
chr11:g.108326153delA
chr13:g.19493456C>T
chr11:g.45183036C>T
chr17:g.28491781C>T
chr21:g.30165980G>A
chr2:g.219251704C>T
chrX:g.54249281C>T
chr1:g.247257141A>T
chr7:g.98953425G>A
chr15:g.100908424G>A
chr1:g.20973004delT
chr17:g.46171608delC
chr12:g.124913406G>A
chr12:g.9150733G>A
chr5:g.141374154delG
chr8:g.2006493G>A
chr8:g.30837612G>A
chr3:g.3043025C>T
chr22:g.21049356C>T
chr1:g.102887005delT
chr5:g.78780516C>T
chr1:g.147619567C>T
chrX:g.48904430delA
chr2:g.94857034C>T
chr1:g.215634613G>A
chr13:g.75239624T>G
chr12:g.27963592G>A
chr11:g.5709390G>T
chr17:g.61483720delA
chr11:g.1099776delC
chr9:g.215431delG
chr3:g.4645395C>T
chr2:g.214781361delT
chr1:g.175365932C>T
chr20:g.353563A>G
chr1:g.169542872G>A
chr14:g.19780651C>T
chr7:g.130384613C>T
chr19:g.4292843G>C
chr2:g.219549173G>A
chr11:g.119051053G>A
chr17:g.29572545G>A
chr18:g.6873514delT
chr1:g.92181315C>A
chr2:g.167246133C>T
chr20:g.63983048G>A
chr6:g.32879424delT
chr5:g.151804029C>T
chr17:g.59570640C>T
chr7:g.77362635C>T
chr3:g.49829206C>T
chr10:g.26157466C>T
chr21:g.39779246G>A
chr5:g.11732154G>A
chr1:g.45655218delA
chr17:g.73430543G>A
chr6:g.96204615T>G
chrX:g.91835595C>T
chr10:g.37147429A>C
chr4:g.155214396G>A
chr7:g.5390359delAAAAAAA
chr8:g.30183230G>A
chr2:g.148961995C>A
chr5:g.135449467delG
chr7:g.1980739delT
chr13:g.26214104delA
chr4:g.272346C>A
chr22:g.36319559C>T
chr17:g.56595542C>A
chr1:g.15573440delT
chr15:g.26883437G>A
chr12:g.25245351C>G
chr2:g.167249851delA
chr8:g.86632787delA
chr17:g.10544120C>A
chr10:g.7727063delA
chr13:g.49630527C>T
chr9:g.128940386G>A
chr15:g.48421652G>A
chr1:g.202438062delTT
chr9:g.62803984G>T
chr3:g.190855348G>A
chr6:g.57050807G>A
chr1:g.101240216C>T
chr20:g.46501480C>A
chr19:g.56623326delT
chr4:g.441644C>A
chr17:g.41886194C>T
chr19:g.464163G>A
chr5:g.156850670C>T
chr15:g.55467137delT
chr7:g.143443982C>A
chr16:g.58543412delAAA
chr12:g.25227341T>G
chr2:g.25753607G>A
chr5:g.14286914C>T
chr10:g.125026674G>C
chr15:g.73323900G>A
chr2:g.241672278delG
chr1:g.171275437C>T
chr12:g.120144421G>A
chr4:g.168396113delT
[truncated: 8,000 more rows]

## Sheet: GBM
chr2:g.208248388C>T
chr7:g.55154129C>T
chr7:g.55165350G>T
chr17:g.7675088C>T
chr17:g.7674220C>T
chr7:g.55152581C>T
chr1:g.145578886T>C
chr10:g.45827364T>G
chr2:g.151464674C>T
chr17:g.41140303C>T
chr17:g.7674221G>A
chr17:g.7673776G>A
chr7:g.55154129C>A
chr7:g.140753336A>T
chr17:g.7674872T>C
chr10:g.87957915C>T
chr5:g.68293310G>A
chr7:g.55181329G>A
chr17:g.41516933C>T
chr10:g.87933147C>T
chr17:g.7673803G>A
chr7:g.55154128G>A
chr7:g.6588774G>A
chr6:g.131877301C>T
chr2:g.200613875C>T
chr7:g.55143387G>A
chr10:g.87933154G>A
chr11:g.60383258C>T
chr3:g.150742046A>C
chr15:g.80168055delG
chr17:g.7674230C>T
chr10:g.45826548G>A
chr7:g.55154017C>T
chr22:g.15690296G>A
chr13:g.19465548G>A
chr17:g.7674945G>A
chr7:g.55156614C>T
chr6:g.56701893G>A
chr1:g.22589224G>A
chr13:g.48379594C>T
chr10:g.87961095C>T
chr15:g.41900864G>A
chr17:g.7675237C>T
chr3:g.12816963C>T
chr17:g.31325958delTCTC
chr1:g.158657611G>A
chr21:g.45935260C>T
chr4:g.188003598C>T
chr17:g.31169985C>T
chr10:g.87933148G>A
chr2:g.113182702C>T
chr20:g.32434542C>T
chr13:g.48367502delTCTT
chr11:g.105029196C>A
chr17:g.7674885C>T
chr7:g.55155850C>T
chr20:g.53254122G>A
chr7:g.55154050A>C
chr10:g.87952143G>A
chr3:g.179218303G>A
chr17:g.7675139C>T
chr17:g.7673802C>T
chr7:g.93483953G>A
chr17:g.41097785G>A
chr15:g.40853915C>T
chr4:g.73576293G>A
chr17:g.7675076T>C
chr3:g.179199088G>A
chr5:g.1034272G>A
chr7:g.55172997C>G
chr17:g.7673796C>T
chr1:g.226064454G>A
chr1:g.152306339G>A
chr1:g.112710245C>T
chr17:g.42572810A>G
chr12:g.117272510C>T
chr5:g.164601035G>C
chr1:g.154544033G>A
chr1:g.26180586C>T
chr11:g.117192275G>C
chr1:g.85034227C>T
chr14:g.23117448G>A
chr16:g.23215210G>A
chr19:g.51416315G>A
chr7:g.142065379G>A
chr15:g.34791116T>A
chr1:g.237625720C>T
chr4:g.20589702C>T
chr5:g.181663G>A
chr6:g.49697859C>T
chr18:g.23861735G>A
chr3:g.130455547C>T
chr2:g.178574224G>A
chr6:g.43435850C>T
chr3:g.38603900G>A
chr3:g.122552545G>A
chr12:g.104304511C>T
chr6:g.20490386G>A
chr12:g.53482188C>T
chr13:g.27089908G>A
chr1:g.151848256G>A
chr9:g.32989903A>G
chr12:g.13002517G>A
chr13:g.94460129C>T
chr16:g.29901807G>A
chr1:g.12666302G>A
chr19:g.10323558G>A
chr2:g.143624152C>T
chr1:g.145856933C>T
chr6:g.87015770G>A
chr2:g.115689880G>A
chr20:g.42677929G>A
chr7:g.55154072A>G
chr12:g.54542642G>A
chr7:g.142960940G>A
chr5:g.481588G>A
chrX:g.46853731C>T
chr5:g.140809101C>T
chr19:g.58127781G>A
chr5:g.161692054G>A
chr18:g.11872298C>A
chr10:g.7640828G>A
chr7:g.101031607C>T
chrX:g.112671186G>A
chr18:g.14542922G>A
chr10:g.87931048G>A
chr1:g.215759735C>T
chr5:g.141214785C>T
chr17:g.7673779C>G
chrX:g.136206481A>C
chr3:g.38910148G>A
chr18:g.26227202C>A
chr17:g.32778552G>A
chr12:g.7379218C>T
chr16:g.31416544C>T
chr3:g.58524558G>A
chr3:g.138949582G>A
chr8:g.72936818C>T
chr19:g.42368985C>T
chr11:g.18025607C>T
chr4:g.107910384C>T
chr6:g.76042019G>A
chr2:g.197402974C>T
chr7:g.86786339C>T
chr5:g.54456017C>T
chr1:g.77933385T>G
chr10:g.98392987G>A
chr11:g.63406643G>A
chr11:g.113790916G>A
chr3:g.179234284A>G
chr4:g.69282658C>A
chr19:g.7744994C>T
chr16:g.12704700G>A
chr19:g.7746039G>A
chr1:g.152304582C>T
chr16:g.71569879C>T
chr4:g.69495328G>A
chr1:g.212619225C>T
chr5:g.146013954C>T
chr11:g.124424359G>A
chr7:g.123955079G>A
chr19:g.4168403C>T
chr11:g.55774143C>T
chr4:g.174976138G>A
chr7:g.143399936C>T
chr11:g.78016559C>T
chrX:g.31071819G>A
chr7:g.65763323G>A
chr10:g.87957955C>T
chr7:g.35090440C>T
chr17:g.41408562G>A
chr7:g.31824870G>A
chr2:g.232409668G>A
chr19:g.15537580G>A
chr1:g.154089582G>A
chr3:g.179198826A>G
chr19:g.55733225G>T
chr10:g.69633097A>C
chr19:g.50963415C>T
chr19:g.49894331G>A
chr10:g.106577452G>A
chr19:g.375850G>A
chrX:g.100914135C>T
chr9:g.66976627C>T
chr11:g.59477776C>T
chr19:g.4117526C>T
chr2:g.227007369G>A
chr14:g.46651778G>A
chr16:g.24346789C>T
chr7:g.117592446C>T
chr10:g.101673509G>A
chr11:g.60703430C>T
chr17:g.7675148G>T
chr10:g.87931062delTA
chr1:g.248295028C>T
chr4:g.67696662G>A
chr7:g.107793751C>T
chr10:g.87960922C>T
chrX:g.103500580G>A
chr20:g.62965634G>A
chr1:g.241783297G>A
chr1:g.165208114G>A
chr4:g.188147263C>T
chr16:g.84981964C>A
chr1:g.248521847G>A
chr11:g.61331640C>A
chr19:g.13935787G>A
chr10:g.87957958_87957959insA
chr19:g.12044157C>T
chr7:g.142946290C>T
chr7:g.142961359C>T
chr20:g.3022152G>T
chr12:g.13753813C>T
chr1:g.228268612C>T
chr12:g.70539975C>T
chr10:g.103441851C>T
chr14:g.18601577A>C
chr17:g.31206360C>T
chr16:g.67238756G>T
chr6:g.33007121G>A
chr4:g.95840175G>A
chr8:g.24397408C>T
chr12:g.103996802G>A
chr19:g.54941643C>A
chr12:g.57625125G>T
chr8:g.27463465C>T
chr19:g.50289628C>T
chr5:g.68293321A>T
chr11:g.22726300G>A
chr5:g.141179746C>T
chr3:g.45112370C>A
chr5:g.5146334C>T
chrX:g.126551605C>T
chr9:g.113374098G>A
chr2:g.98396574C>T
chr11:g.26660337C>T
chr19:g.17974090G>A
chr19:g.54574944G>A
chr17:g.7675994C>T
chr17:g.7670685G>A
chr15:g.90815414G>A
chr19:g.19544184G>A
chr12:g.91104194G>A
chr5:g.19721407C>T
chr15:g.101759775G>T
chr3:g.14820928C>T
chr3:g.3097996C>T
chr17:g.7592292G>A
chr3:g.120193415C>A
chr20:g.45222506C>T
chr1:g.169729633G>A
chr19:g.18220478G>A
chr10:g.87952142C>T
chr4:g.54277969G>C
chrX:g.54014512G>A
chr4:g.73094180T>C
chr1:g.35736339G>A
chr19:g.15464114C>T
chr22:g.19765012G>T
chr17:g.41379151G>A
chr5:g.96743646C>T
chr19:g.50963407G>A
chr16:g.31397869G>A
chr14:g.104941406C>T
chr16:g.67284909C>T
chr20:g.45897779G>C
chr15:g.43699027C>T
chr20:g.34985115C>T
chr6:g.33685705C>T
chr1:g.152306229C>T
chr11:g.62521178A>G
chr1:g.207473870C>T
chr12:g.120661116G>C
chr9:g.103005522G>A
chr11:g.125748917C>T
chr2:g.206751065G>A
chr19:g.8698708G>A
chr5:g.128393189C>T
chr14:g.94379500G>A
chr2:g.178592877G>A
chr15:g.101759755C>G
chr19:g.57329032C>T
chr2:g.74520016C>T
chr19:g.32692252C>T
chr5:g.13719001C>T
chr5:g.150124324G>A
chr16:g.21678531C>T
chr7:g.100960435G>A
chr11:g.7796644G>A
chr19:g.42910580G>A
chr10:g.102141085C>A
chr5:g.161326400G>A
chr7:g.71787870C>T
chr17:g.37705006G>A
chrX:g.154353351C>T
chr10:g.45826589T>C
chr6:g.109980125G>A
chr17:g.7674250C>T
chr2:g.97589632C>T
chr5:g.23522386G>A
chr12:g.101127006G>A
chr22:g.23632018C>T
chr20:g.45943209C>T
chr2:g.233693626C>T
chr9:g.127344309C>A
chr1:g.167127159G>A
chr12:g.3280459C>T
chr3:g.33153094G>A
chr2:g.173366395G>A
chr11:g.4803717C>T
chr2:g.166406556C>T
chr3:g.184276617C>T
chr17:g.18236638G>C
chr3:g.98354014G>A
chr10:g.119453195T>G
chr3:g.179234297A>G
chr4:g.40117928G>A
chr17:g.80473310C>T
chr7:g.140091107C>T
chr19:g.35310097C>T
chr17:g.7673778T>G
chr17:g.81706946A>G
chr9:g.35685111G>A
chr3:g.51712517C>T
chr7:g.151143363C>T
chr21:g.31924561C>T
chr1:g.152304410G>A
chr17:g.7674262T>C
chr4:g.150851990C>T
chr11:g.118115166G>A
chr1:g.145853998C>A
chr21:g.41741300G>A
chr19:g.12250282T>C
chr1:g.239908935C>T
chrX:g.19950834C>T
chr11:g.45204768A>C
chr8:g.143020904T>G
chr19:g.8125967C>T
chr19:g.54124606C>T
chr12:g.110884055G>T
chr5:g.151525861G>A
chr17:g.81846612G>A
chr19:g.34426073G>T
chr11:g.66364307C>T
chr9:g.27359145G>A
chr6:g.75177839C>T
chr19:g.56028442C>T
chr17:g.34256290G>A
chr7:g.130680971C>T
chr14:g.94467321G>A
chr2:g.169129059C>T
chr7:g.55400104G>A
chr3:g.56434949C>T
chr12:g.130414288C>T
chr6:g.160713106C>T
chr4:g.154320728C>T
chrX:g.12920454C>T
chr6:g.152140005C>T
chr6:g.88144451T>G
chr6:g.51847905C>T
chr5:g.140877457C>T
chr8:g.124035289C>T
chr6:g.138336415G>A
chr12:g.5799550G>A
chr11:g.130411597C>T
chr8:g.25368216C>T
chr2:g.169256129G>A
chr7:g.23246845G>A
chr11:g.130123649G>T
chrX:g.70259295G>A
chr5:g.172969654C>G
chr17:g.49045024C>T
chrX:g.13716111C>A
chr2:g.113192541G>A
chr16:g.88622279C>T
chr3:g.170423203G>A
chr11:g.65635364G>A
chr5:g.40945294C>T
chr10:g.87894051G>A
chr2:g.70514897G>A
chr14:g.39401369G>T
chrX:g.18646008C>T
chr10:g.87960893G>A
chr6:g.29462628G>A
chr15:g.42071883G>A
chr10:g.27414068C>T
chr19:g.10021311C>T
chr8:g.119595865C>T
chr10:g.87933166G>A
chr4:g.99621177C>A
chr2:g.102525097G>A
chr7:g.140124734C>T
chr2:g.131218898G>A
chr7:g.21900079C>T
chr20:g.5863341G>T
chr8:g.30843656G>A
chr7:g.33357863C>T
chr4:g.188003486G>A
chr3:g.14820282C>T
chr17:g.59570598G>T
chrX:g.77618846C>T
chr1:g.90938836C>T
chr7:g.55155858delGTGCGT
chr7:g.55142382T>G
chr5:g.140788144G>A
chr5:g.160408372C>T
chr2:g.37008638C>T
chr7:g.106867987G>A
chr12:g.128875945G>A
chr2:g.206309718G>A
chr21:g.44637958G>A
chr3:g.112047865G>A
chr7:g.50058016G>A
chr4:g.625799C>T
chr5:g.41149347G>A
chr19:g.35351934C>T
chr7:g.113878777G>A
chr21:g.44646465G>A
chr1:g.24401360C>T
chr6:g.7565390G>A
chr17:g.7674250C>A
chr22:g.16591165G>A
chr7:g.102282768C>T
chr11:g.1025025G>A
chr12:g.117280767G>A
chr16:g.1457255T>C
chr12:g.54520756G>A
chr12:g.22524526G>A
chr14:g.39151841T>A
chr3:g.32890590_32890591insC
chr7:g.72106194G>A
chr22:g.37086352C>T
chr8:g.39755899G>A
chr5:g.140632132C>T
chr8:g.103989307G>A
chr1:g.207144684C>T
chr21:g.44528546C>T
chr13:g.101722904G>A
chr2:g.200981718C>T
chr11:g.1100947C>T
chr5:g.120686410C>T
chr19:g.6534995G>A
chr9:g.5072541G>A
chr1:g.117911994G>A
chr1:g.196258291C>A
chr15:g.34348096G>T
chr1:g.158776759G>A
chr15:g.51499800C>T
chr12:g.108899410C>T
chr18:g.22417897G>A
chr20:g.31372952C>T
chr12:g.5949864G>A
chr19:g.50826651G>A
chr3:g.179199066G>A
chr1:g.247672814C>T
chr19:g.56027707G>A
chr17:g.8340232C>T
chr1:g.116600167G>A
chr5:g.163444G>A
chr21:g.10578578G>A
chr6:g.43259591_43259592insC
chr1:g.53090644G>A
chr9:g.35093619A>C
chr15:g.63677926C>T
chr7:g.55181317_55181318insACAACCCCC
chr19:g.51768819G>A
chr1:g.19770555G>A
chr7:g.142871580G>A
chr5:g.43291082C>T
chr15:g.64674331G>A
chr8:g.42756977G>A
chrX:g.35967679G>A
chr5:g.161686285G>T
chr5:g.35649387C>T
chr16:g.88638593G>A
chr5:g.140884323C>T
chr2:g.227280588G>A
chr1:g.230690113C>A
chr5:g.162153194C>T
chr6:g.29462319C>T
chr18:g.50269573C>T
chrX:g.154360077C>T
chr20:g.32084422G>A
chr4:g.38797083G>A
chr6:g.10995112C>T
chr19:g.9093529C>A
chr9:g.96726887C>G
chr12:g.25245350C>T
chrX:g.110455407A>C
chr11:g.102839233G>A
chr6:g.116515952C>T
chr22:g.41151906C>A
chr18:g.65809850G>A
chr10:g.87952134G>A
chr7:g.101031645G>A
chr3:g.172448207C>T
chr5:g.169193549G>A
chr1:g.205810148G>A
chr11:g.117192642C>T
chr6:g.51887174C>T
chr4:g.112186822C>T
chr1:g.248099481C>G
chr16:g.31325525G>A
chr4:g.54264975G>A
chr19:g.54803628C>T
chr5:g.68295418A>G
chrX:g.72129905G>A
chr7:g.55142384G>A
chr16:g.9849923G>A
chr11:g.59457192G>A
chr6:g.38990041G>A
chr20:g.45208411C>T
chr14:g.19975800C>T
chr8:g.103989369C>T
chr2:g.181493404G>A
chr4:g.55107838G>A
chr9:g.87706472T>C
chrX:g.126164924G>A
chr11:g.59845491G>A
chr17:g.5350502C>T
chr4:g.38998757G>A
chrX:g.126165188C>T
chr2:g.178598799C>T
chr2:g.137056641C>T
chr7:g.144259419G>A
chr22:g.23765058A>T
chr21:g.46207429A>C
chr18:g.57354477G>T
chr1:g.114713908T>A
chr11:g.63304123G>A
chr5:g.55908380C>A
chr11:g.55839237G>A
chr19:g.11648423G>A
chr17:g.17796980C>T
chr17:g.28906949T>C
chr6:g.73762459A>G
chr14:g.73244635C>A
chr16:g.70874858G>A
chr8:g.7056626T>C
chr13:g.24486192T>A
chr15:g.50047462A>T
chr14:g.73264230G>A
chr14:g.20034050A>C
chr19:g.3744030C>T
chr1:g.33624613C>T
chr15:g.30367448G>A
chr11:g.118198026G>C
chr19:g.7561569C>T
chr6:g.138849405G>A
chr18:g.2784504C>T
chr6:g.31972095G>A
chr12:g.53383351G>T
chr7:g.100960308A>T
chr17:g.48931689A>T
chr15:g.90642025A>T
chr9:g.96759667G>A
chr12:g.113399122G>C
chr12:g.50990851A>T
chr20:g.1375508C>T
chr10:g.29480674A>G
chr1:g.43428039C>T
chr5:g.43291116A>C
chr4:g.99949623A>T
chr12:g.57746190T>G
chr18:g.67513983T>C
chr13:g.36125841C>T
chrX:g.48350123C>T
chr17:g.7039861T>C
chr6:g.63712271A>G
chr19:g.47320310G>A
chr17:g.3935248C>T
chr1:g.56691395T>G
chr7:g.44759331C>T
chr6:g.10989770C>T
chr2:g.127505180C>T
chr2:g.86088595G>T
chr1:g.46507034C>A
chr15:g.25230856G>A
chr22:g.18121608G>A
chr4:g.849968C>T
chr20:g.42102247C>A
chr20:g.34290742G>A
chr3:g.56624512G>A
chr8:g.143728032G>A
chr2:g.21015200G>T
chr3:g.52441682G>T
chr12:g.52367191C>T
chr14:g.81278378T>G
chr17:g.80754163C>T
chr11:g.94088886G>A
chr1:g.161170644C>T
chr11:g.47573223G>A
chr6:g.108663856G>A
chr5:g.42711263A>C
chr12:g.13055821G>A
chr1:g.246557504G>A
chr1:g.31619550G>A
chr12:g.122716882G>A
chr4:g.3175013C>A
chr8:g.91071233G>T
chr10:g.49458929delG
chr1:g.150994618delC
chr2:g.140908031G>A
chr1:g.153645361T>C
chr17:g.75951422A>T
chr16:g.70259156T>A
chr19:g.43361559G>T
chr18:g.23858707G>C
chr16:g.1954010C>A
chr8:g.42375688C>A
chr17:g.18119893G>A
chr7:g.135557926C>T
chr10:g.30459397C>T
chr6:g.158789371T>C
chr10:g.122241989G>A
chr9:g.122661974T>C
chr11:g.90203322C>A
chr4:g.121329653A>G
chr1:g.197510944T>A
chr18:g.31458574G>A
chr14:g.59745866G>A
chr11:g.108511412C>T
chr20:g.48963830G>T
chr12:g.117330745T>C
chr5:g.150931300T>C
chr20:g.17494059T>G
chr17:g.64536653C>T
chr11:g.17091614G>T
chr17:g.44063826G>T
chr7:g.100160761G>A
chr12:g.18282261A>G
chr3:g.46358287C>A
chr9:g.91410180G>A
chr1:g.115286191G>T
chr5:g.131359468G>C
chr11:g.132657220G>A
chr12:g.54523524G>A
chr18:g.905413G>A
chr6:g.31899915C>T
chr4:g.7638370C>A
chr11:g.47704714T>C
chr5:g.1075418G>A
chr6:g.32223081G>A
chr1:g.205187637C>T
chr14:g.103336796T>G
chr8:g.38329450A>C
chr1:g.200409079A>T
chr1:g.197102236T>G
chr3:g.38847530G>T
chr12:g.3550009A>C
chr10:g.62813169G>A
chr16:g.19440520C>T
chr5:g.33162209C>T
chr2:g.39058748G>T
chr12:g.31148817T>G
chr20:g.31844606G>A
chr19:g.52801046C>G
chr19:g.19260869delC
chrX:g.47449395T>G
chr5:g.62365343G>A
chr9:g.19049926T>A
chr4:g.168668355G>T
chr11:g.94478799C>A
chr12:g.52795452C>A
chrX:g.73844557T>A
chr4:g.186154558G>A
chr13:g.95043772T>C
chr6:g.144533219C>A
chr17:g.53823730C>A
chr1:g.179534905C>T
chr12:g.20883476C>T
chr15:g.64152651A>C
chr3:g.158710742T>A
chr1:g.42835131T>C
chrX:g.49077703G>A
chr10:g.73422644T>C
chr9:g.19573466T>G
chr17:g.10525733G>A
chr12:g.123820720G>A
chr1:g.39631554C>T
chr9:g.14842380G>T
chr7:g.150474241G>A
chrX:g.71302320_71302321insA
chr1:g.157835926A>G
chr11:g.40114394G>T
chr1:g.248626360C>T
chrX:g.57592995C>G
chr19:g.57291330C>T
chr14:g.106349516G>T
chr20:g.17494827T>G
chr1:g.19113706A>C
chrX:g.87618000C>T
chr1:g.109544092T>G
chr1:g.152112519C>T
chr17:g.63714026T>C
chr1:g.155821493G>A
chr6:g.166938883G>T
chr3:g.120167603T>C
chr7:g.34849693A>G
chr10:g.99406159T>C
chr12:g.49028883T>G
chr12:g.6018683C>A
chrX:g.54759802A>T
chr14:g.24575360C>T
chr19:g.55154146G>A
chr22:g.29438837G>A
chr12:g.50714583G>A
chr22:g.35781666C>T
chr15:g.32636579G>A
chr9:g.135561854C>T
chr11:g.118136959C>T
chr13:g.41590644G>T
chr21:g.41250878T>G
chr15:g.49934084G>T
chr2:g.101002801C>A
chr13:g.51460958C>T
chr14:g.64541057G>A
chr11:g.73900306T>C
chr2:g.159175025G>A
chr22:g.50739802T>A
chr11:g.1252479G>A
chrX:g.71101649T>C
chr20:g.46370419A>T
chr14:g.70742474G>A
chr2:g.27457734G>T
chr22:g.21805902T>C
chr2:g.46758973G>C
chr2:g.178782274G>A
chr17:g.51166827G>T
chr17:g.64466446G>T
chr1:g.12363148A>G
chr17:g.3899707G>T
chr1:g.167518567_167518568insTC
chr17:g.8044867G>A
chrX:g.152737236_152737237insA
chr12:g.57059919G>T
chr1:g.19114921A>G
chr13:g.97997581G>A
chr16:g.18830226A>G
chr5:g.141421589_141421590insTT
chr6:g.152219029G>T
chr19:g.22402815C>A
chr1:g.214483094G>A
chr2:g.218751729T>C
chr20:g.45959361C>T
chr1:g.68145939A>G
chr1:g.206600304C>T
chr12:g.54409313_54409314insC
chr22:g.17827704T>C
chr16:g.2530611G>A
chr1:g.26022679G>A
chr11:g.5736676A>T
chr4:g.188002849G>A
chr20:g.41361477delCCT
chr16:g.69695271C>A
chr2:g.28902117A>C
chrX:g.47412638C>T
chr6:g.10429879A>G
chr12:g.8605410C>T
chr6:g.41229016T>G
chr1:g.37723075C>T
chr1:g.248388218G>A
chr13:g.25096883A>C
chr2:g.62136010C>A
chr3:g.129478130A>G
chr16:g.2531059G>T
chr2:g.24063159_24063160insTG
chr14:g.77380474A>T
chr12:g.13373155A>T
chr17:g.58599398G>A
chr5:g.56111641T>C
chr19:g.51265520T>A
chr17:g.35930640C>G
chr1:g.74205215C>T
chr2:g.210678018A>C
chr1:g.155196056C>G
chr10:g.47349752A>T
chr6:g.90556515G>A
chr11:g.71548666C>A
chr2:g.241634064G>A
chr2:g.191383291G>A
chrX:g.65502369C>T
chr4:g.26406186G>A
chr2:g.47800215G>T
chr9:g.137107377C>A
chr7:g.97855382G>A
chr10:g.60140356C>T
chr7:g.96028274C>T
chr2:g.201647697C>A
chr1:g.186090780T>A
chr4:g.39913636G>A
chr12:g.57472486G>T
chr1:g.207470765C>A
chr19:g.50045662G>A
chr2:g.165162817T>C
chr20:g.20033294C>A
chr21:g.34834268T>C
chrX:g.131544375C>T
chr1:g.37997733A>C
chr1:g.214620697G>A
chr1:g.11042995G>A
chr10:g.14774572A>C
chr7:g.131504461delG
chr10:g.15109129C>G
chr3:g.51236365T>C
chr11:g.113362497C>T
chr12:g.117968181T>G
chr6:g.161049854C>A
chr21:g.30396628T>G
chr15:g.59261421G>A
chr19:g.7698361C>T
chr4:g.44702954G>T
chr2:g.163610123G>T
chr2:g.25743863C>A
chr6:g.78940818C>T
chr1:g.53461517T>G
chr8:g.24500201C>A
chr19:g.7743042C>T
chr8:g.104349131C>T
chr22:g.17881248G>A
chr19:g.7747326C>T
chr17:g.10629600G>T
chr1:g.158685289C>T
chr9:g.86337415A>T
chr21:g.38402632G>A
chr11:g.95184428G>T
chr22:g.30932688G>A
chr19:g.52415534C>T
chr2:g.98093060G>T
chr7:g.74189674A>C
chr12:g.105143147C>T
chr3:g.98788086C>T
chr6:g.348853G>T
chr3:g.49098083T>C
chr12:g.109483583G>A
chr3:g.30844247T>A
chr7:g.144259011C>A
chrX:g.71544653C>G
chr11:g.119311169G>T
chr1:g.31584986C>T
chr8:g.38146447C>A
chr1:g.196779971T>A
chr12:g.122172339T>C
chr18:g.63588686G>A
chr16:g.30118414C>T
chr5:g.151566377T>C
chr4:g.123313942G>T
chr1:g.197040619C>A
chr3:g.111913348T>C
chr3:g.38728733G>A
chr16:g.89782883C>A
chr1:g.119922326G>C
chr1:g.158579412G>T
chr16:g.53370881T>G
chr9:g.6254512G>T
chr12:g.6354825G>A
chr22:g.20366668A>T
chr6:g.159804606G>A
chr10:g.111011709G>T
chr20:g.63494883G>A
chr9:g.69516352C>T
chr11:g.700206T>A
chr15:g.89677502A>G
chr6:g.56460181T>C
chr9:g.18905774C>A
chr11:g.86952500A>C
chr6:g.28995838T>C
chr7:g.150720452G>A
chr2:g.218075633G>A
chr19:g.21423774C>A
chr6:g.152234759G>T
chr2:g.169152872G>T
chr2:g.178856370T>C
chr3:g.130093131A>C
chr17:g.76572699T>G
chrX:g.49031422T>C
chr17:g.28741434G>C
chr13:g.24879248C>T
chr6:g.149742465C>A
chr3:g.195771766G>T
chr7:g.4017259A>T
chr7:g.41690294C>G
chr3:g.197674343G>C
chr10:g.100488061A>C
chr3:g.49028699G>C
chr15:g.52205163G>A
chr15:g.91029984G>C
chr7:g.6401953C>T
chr14:g.37823829C>T
chr1:g.43949779C>G
chr19:g.38585995A>C
chr8:g.107958243G>A
chr4:g.25018101C>A
chr14:g.104945438G>A
chr1:g.168104648C>A
chr1:g.222543660C>T
chr3:g.183921233G>A
chr18:g.50382180G>T
chr17:g.3433493C>T
chr10:g.98263036G>A
chr2:g.102176623C>T
chr6:g.30713151A>C
chr10:g.87952119G>A
chrX:g.19373686C>T
chr13:g.77918093T>C
chr5:g.150541579G>A
chrX:g.86514345C>T
chr15:g.90909419A>G
chr12:g.56326910G>A
chr6:g.44287851C>T
chr22:g.50455280C>T
chr17:g.82831685G>A
chr19:g.38624186G>A
chr12:g.52823936G>A
chr3:g.87991686G>T
chr3:g.38742488T>A
chr17:g.75728456G>T
chr5:g.127410414A>T
chr2:g.48458201G>T
chr6:g.116258725C>T
chr9:g.32784819C>T
chr3:g.9947954G>A
chr6:g.138882796G>A
chr1:g.39335145C>T
chr12:g.7373445G>T
chr15:g.84944794A>C
chr14:g.94496397C>A
chr3:g.157436847delCTCA
chr15:g.89702027A>C
chr14:g.105840471C>T
chr1:g.52033274T>A
chr12:g.26224372C>G
chr16:g.29986443G>A
chr9:g.136846513G>A
chr4:g.146903554G>A
chr3:g.78617768A>G
chr1:g.159713891C>A
chr19:g.51629434G>C
chr3:g.179358976G>A
chr2:g.32470288T>A
chr22:g.22548586C>T
chr12:g.39294333C>T
chr3:g.135132907C>A
chr9:g.86035426C>T
chrX:g.36085325A>T
chr9:g.113049456T>G
chr7:g.122621608G>A
chr18:g.80136037G>T
chr19:g.16190958G>A
chr1:g.150274142C>A
chr1:g.32216837A>C
chr5:g.56923149G>A
chr11:g.57368048C>T
chr9:g.125963017T>A
chr12:g.112141048C>A
chrX:g.20044405C>A
chr17:g.16439157C>A
chr1:g.161098842C>T
chrX:g.2938102G>T
chr1:g.19904371G>A
chr6:g.21065175T>A
chr3:g.9761716T>C
chr13:g.21157963T>G
chr8:g.37754019T>C
chr1:g.153973650C>A
chr9:g.136459220C>T
chr11:g.408155G>A
chr2:g.178306184G>A
chr9:g.110941492C>T
chr6:g.83253682C>T
chr14:g.72998261delG
chr6:g.132684401G>A
chr3:g.151436851G>A
chr7:g.24871994A>C
chr19:g.53382531C>T
chr15:g.71341318G>C
chr6:g.34036596C>T
chrX:g.149885246G>T
chr12:g.100600388T>A
chr17:g.8265599A>G
chr15:g.43260158C>T
chr12:g.106067908G>A
chr5:g.141955602G>C
chr5:g.113010755G>A
chrX:g.17801822G>A
chr10:g.22573398A>C
chr16:g.84130215C>A
chr1:g.17621938C>T
chr15:g.55639755G>A
chr11:g.674751G>A
chr4:g.89248132G>T
chr10:g.102919855A>G
chr2:g.201477721G>T
chr19:g.9960504T>C
chr17:g.8255527T>C
chr19:g.2877394C>T
chr16:g.23757261C>T
chrX:g.130025299_130025300insACGGCAGAAGAGCCGAA
chr17:g.59214893T>G
chr1:g.85121756C>T
chr7:g.100952492C>T
chrX:g.136488326_136488327insG
chr9:g.83665045G>A
chr12:g.11310410C>T
chr1:g.248626996A>G
chr18:g.58528937C>T
chr19:g.38467698C>T
chr10:g.122211167T>G
chr9:g.100346144A>C
chr14:g.24631091T>C
chrX:g.47977222G>A
chr14:g.72941763A>C
chr1:g.66365730C>T
chrX:g.71458295delG
chr12:g.5971621_5971622insC
chr14:g.73712859A>C
chr1:g.108848989A>G
chr5:g.74733069G>A
chr12:g.80279092G>A
chr17:g.8888357C>T
chr4:g.98887132T>C
chr20:g.42199271G>T
chr6:g.160078216T>G
chr11:g.93730545A>G
chr20:g.10038262A>G
chr7:g.117784264C>A
chr2:g.46758606C>T
chr8:g.17373163A>C
chr17:g.39605952G>A
chr11:g.44264900C>T
chr12:g.7483421G>A
chr3:g.9763145A>C
chr2:g.68131270C>G
chr2:g.227330705A>T
chr7:g.148816757C>T
chr20:g.34715327T>A
chr7:g.124746608A>G
chr16:g.84101703C>A
chr17:g.47975842G>C
chr19:g.54063771C>T
chr2:g.132645025G>C
chr1:g.109231763C>T
chr20:g.59024252C>G
chr5:g.170106354G>C
chr19:g.11685248G>A
chr2:g.210678091A>G
chr22:g.25231632C>T
chr19:g.52555523T>A
chr7:g.100057307C>A
chr2:g.31261609A>T
chr4:g.73091134C>A
chr1:g.67329673C>G
chr12:g.23534467C>T
chr1:g.218436012C>A
chr7:g.48007296G>A
chr16:g.35170226G>A
chrX:g.80030677C>A
chr13:g.33061689delA
chr1:g.78492917T>C
chr1:g.26364756C>T
chrX:g.37010469G>A
chr19:g.35299700C>T
chr5:g.123000003G>T
chr11:g.47289910G>A
chr15:g.28014839T>G
chr19:g.54743810delCTT
chr10:g.50836304C>T
chr3:g.149071316T>G
chr2:g.60797245C>A
chr9:g.74642755T>G
chr14:g.64742233C>G
chr4:g.4862965T>C
chr1:g.86993078G>C
chr12:g.32624452G>T
chr20:g.13876065G>C
chr10:g.87952158A>G
chr22:g.41945964C>T
chr1:g.17249143G>A
chr1:g.159919302A>G
chr8:g.144333659G>A
chr2:g.112390132T>A
chrX:g.49251430G>A
chr5:g.141431892A>C
chr19:g.39329017T>C
chr13:g.110641459A>C
chr11:g.95865607C>T
chr11:g.57312918G>A
chr12:g.96651807T>C
chr7:g.98625160C>T
chr3:g.171005285G>A
chr12:g.72377998C>T
chr1:g.152215943_152215944insGGA
chr10:g.7964573G>T
chr15:g.33848363G>A
chr1:g.148103867C>A
chr19:g.58129272C>A
chr12:g.6837782T>A
chr3:g.38095762G>C
chr19:g.16209047G>T
chr2:g.241744788T>C
chr16:g.48096828A>G
chr4:g.13582272C>T
chr10:g.96985062_96985063insA
chr8:g.138151534T>C
chr12:g.57471379G>T
chr8:g.118933204T>A
chr19:g.53679071C>T
chrX:g.133027871C>T
chr1:g.54786001C>T
chr1:g.230203265G>T
chr9:g.35852837C>T
chr2:g.109615517C>A
chr22:g.43208162T>C
chr10:g.85854516A>C
chr8:g.103912143C>T
chr1:g.44806608G>A
chr9:g.84001881C>A
chr6:g.143857432G>T
chr3:g.132457383T>C
chr5:g.131960567G>A
chr11:g.66691610C>A
chr2:g.131040414G>A
chr6:g.46656030C>T
chr12:g.120162017C>T
chr19:g.681446G>A
chr1:g.230710072C>T
chr18:g.12030538C>G
chr19:g.18175685A>C
chr17:g.79735101C>T
chr16:g.30353278G>A
chr6:g.29003900C>A
chr12:g.38724870C>A
chr16:g.30716097A>G
chr14:g.73088100T>C
chr1:g.216651039G>A
chr2:g.74252333C>T
chr20:g.38139585G>T
chr17:g.56950602G>T
chr3:g.54562822T>G
chr5:g.171869740G>A
chr15:g.24676022G>A
chr10:g.94402617G>A
chr6:g.33999980C>G
chr9:g.122724468G>A
chr10:g.114299273T>C
chr1:g.175079551G>A
chr1:g.152220360A>G
chrX:g.10139456A>T
chr5:g.40771779C>A
chr1:g.114730597G>A
chr15:g.25375422G>T
chr16:g.74469029G>A
chr20:g.62199134G>A
chr12:g.112446394G>A
chr5:g.39383021G>T
chrX:g.78136919A>G
chr4:g.13603927T>C
chr16:g.48167561C>A
chr5:g.113101838C>A
chr21:g.33352759G>T
chr6:g.38288406G>T
chr10:g.87057768delT
chr1:g.110673524C>T
chr5:g.67133634C>T
chr20:g.23364772A>G
chr17:g.41178185C>A
chr15:g.74133392C>T
chr20:g.24963723C>T
chr13:g.110719431C>T
chr17:g.74952343C>T
chr11:g.64288399C>T
chr1:g.54045739G>A
chr6:g.161098386C>G
chr11:g.46770977C>T
chr20:g.14052004G>A
chr13:g.113650481C>T
chr2:g.167242607A>C
chr11:g.6437429G>T
chr16:g.24569934_24569935insA
chr4:g.113199039C>A
chr12:g.14829456C>G
chr2:g.189006344G>T
chr5:g.83644607C>T
chr1:g.23845659A>G
chr10:g.87508467G>T
chr11:g.64750472T>A
chr1:g.27850326C>A
chr9:g.98768189T>A
chr14:g.64003151T>C
chr20:g.23603551C>T
chr2:g.206960892G>C
chr5:g.115212304C>A
chr3:g.51312009T>G
chr11:g.65109347C>T
chr14:g.102017200A>T
chr1:g.159931895C>A
chr12:g.9202660C>G
chr14:g.24606626T>A
chr4:g.30724186T>C
chr15:g.26567707A>G
chr11:g.6456166C>T
chr19:g.16902823G>A
chrX:g.118766964G>A
chrX:g.105912752T>G
chr8:g.72069074C>A
chr19:g.11030765A>G
chr5:g.40854204A>G
chr21:g.29693976C>T
chr9:g.712034A>G
chr9:g.77295750T>G
chr7:g.112486971G>A
chr22:g.29044879C>T
chr6:g.37218945T>C
chr7:g.100590300C>T
chr14:g.71028735A>C
chr19:g.55947869G>A
chr9:g.35404041C>T
chr7:g.113878415C>A
chr2:g.33549682A>G
chr10:g.32017157T>C
chr17:g.10400425G>T
chr4:g.6329273G>A
chr17:g.44259300G>A
chr19:g.7743185C>T
chr19:g.49337017G>A
chr4:g.55449469G>A
chr11:g.18612411A>G
chr2:g.73816934T>G
chr1:g.235181908A>G
chrX:g.50192912G>A
chr12:g.123605956G>A
chr12:g.49870512G>A
chr7:g.10933579G>A
chr12:g.31101096_31101097insCC
chr16:g.31465017C>G
chr1:g.17825962G>A
chr1:g.46034621T>C
chr2:g.232920565G>A
chr19:g.5778547G>T
chr22:g.37805614G>T
chr1:g.103573766G>A
chr11:g.45649754C>T
chr12:g.110459811C>T
chr10:g.129842222G>C
chr2:g.106073926T>C
chr6:g.637753C>T
chr1:g.109690481G>T
chr1:g.24082627G>A
chr11:g.60703470C>T
chr4:g.46123852A>C
chr2:g.201480315C>T
chr9:g.69013787C>T
chr12:g.132625672C>T
chr1:g.8355569_8355570insC
chr1:g.155198435G>A
chr12:g.31452018G>A
chr1:g.15491227A>T
chr6:g.148532901G>A
chr4:g.121902900T>C
chrX:g.91879322_91879323insCC
chr10:g.49458805G>T
chr6:g.36323429A>G
chr21:g.33799902C>G
chr8:g.103697175C>T
chr4:g.24554842delG
chr15:g.64859963G>T
chrY:g.19731868G>A
chr7:g.138919110A>C
chr6:g.49786569G>T
chr19:g.18216804G>A
chr14:g.60648952G>A
chr17:g.39108308delT
chr7:g.63292368G>T
chr1:g.15717920A>G
chr19:g.4523757G>A
chr16:g.81999201C>T
chr8:g.8377963G>T
chr11:g.134345041G>A
chr2:g.196257887G>A
chr3:g.52407446C>T
chr7:g.5528723delT
chr15:g.89645099C>T
chr8:g.1925335T>A
chr18:g.80135914C>G
chr10:g.103388152A>C
chr18:g.36612065G>A
chr11:g.134387561G>A
chr10:g.113849917C>T
chr4:g.2907817A>G
chr8:g.141357384G>A
chr19:g.8403499G>A
chr13:g.38769754G>A
chr10:g.116675113C>T
chr3:g.138071818C>T
chr9:g.33466607C>T
chr7:g.73570870T>A
chr9:g.128063836C>T
chrX:g.153541891C>T
chr12:g.71696500T>C
chr7:g.112484876T>C
chr21:g.41241936G>A
chr8:g.99854131A>G
chr1:g.169793732T>G
chr8:g.98428407G>A
chr6:g.87015530G>A
chr15:g.45105812G>T
chr9:g.114323190G>T
chr17:g.72122813C>T
chr10:g.112168472C>T
chr19:g.6906467C>T
chr4:g.147634476A>G
chr22:g.46464167G>A
chr14:g.106324494G>A
chrX:g.107597443G>A
chr22:g.29438808T>C
chr3:g.32818200G>A
chr2:g.178538675G>A
chr8:g.37839500T>C
chr19:g.10678629C>T
chr1:g.58682311G>C
chr16:g.2853972C>T
chr10:g.45425069G>A
chr22:g.45563157T>G
chr1:g.230703156C>T
chr2:g.233161730G>T
chr5:g.133199344G>T
chr1:g.152353551C>G
chr19:g.53383127G>T
chr14:g.20300653C>A
chr16:g.27884561C>T
chr9:g.128352649G>T
chr11:g.74005779G>A
chr4:g.48899898G>T
chr2:g.55025210C>A
chr2:g.121765298G>T
chr6:g.88614364T>A
chr3:g.44556991G>C
chr2:g.36808475G>A
chr8:g.80559500G>A
chr4:g.118514556C>T
chr5:g.178932297T>C
chr12:g.14841036C>A
chr1:g.52692827C>A
chr12:g.64097331C>T
chr6:g.160492814G>T
chr12:g.32755700T>G
chr5:g.19473259G>T
chr15:g.45691020G>A
chr21:g.14966360C>A
chr7:g.55146626C>T
chr5:g.14389293A>C
chr12:g.16036878G>A
chr7:g.75559797A>T
chr20:g.7885540C>T
chr9:g.96972889G>T
chr13:g.20981614G>A
chr2:g.27393094C>G
chr14:g.56801693G>A
chr5:g.81086939C>T
chr16:g.67227878G>C
chr5:g.139478371G>A
chr5:g.140928574G>T
chr16:g.23695325G>A
chr10:g.100972982C>T
chrX:g.16818657T>C
chr17:g.63437592C>T
chr1:g.116584964G>T
chr1:g.247300984C>T
chr7:g.144075078C>T
chr9:g.110427632G>T
chr7:g.30875538T>C
chr12:g.7374748G>A
chr21:g.44080071G>A
chr1:g.23779913G>T
chr8:g.56445689C>T
chr14:g.50772449C>T
chr11:g.86951410G>A
chr2:g.29045352T>A
chr15:g.34102958C>T
chr3:g.43576847T>A
chr12:g.13563317G>A
chr17:g.53823367G>A
chr8:g.119089746C>T
chr22:g.50448414C>T
chr17:g.61966632T>C
chr11:g.7959737C>A
chr13:g.25551505T>A
chr4:g.153315552G>T
chr1:g.156871702G>A
chr2:g.131443381C>T
chr11:g.44275551delC
chr16:g.83089G>A
chr20:g.60070812A>T
chr7:g.135628085G>A
chr11:g.77202357C>T
chr17:g.7550176A>G
chr11:g.47284236T>G
chr9:g.5921026C>T
chr11:g.45870432G>A
chrX:g.68053666G>A
chr8:g.132794421G>A
chr1:g.233376062G>C
chr7:g.127611993G>T
chr13:g.33105677A>C
chr6:g.51836419G>T
chrX:g.70239741T>A
chr5:g.140829362delT
chr11:g.106939606T>C
chr21:g.29326871_29326872insT
chr9:g.132679277T>A
chr15:g.74176103G>C
chr7:g.107940035C>T
chr1:g.44830855C>T
chr3:g.45901572G>A
chr22:g.19450846A>G
chrX:g.154156357G>C
chr14:g.55140318G>A
chr17:g.82064888C>T
chr10:g.128112206G>A
chr7:g.154876017C>T
chr14:g.72771739C>A
chr19:g.4048229C>A
chr1:g.3405581G>A
chr5:g.43174497A>T
chr9:g.21304904T>C
chr5:g.157163534G>A
chr3:g.46679261G>A
chr1:g.161196326G>A
chr9:g.132921428_132921429insG
chr19:g.2102027C>T
chr5:g.41070846G>T
chr1:g.41584130C>T
chr1:g.248406980delC
chr5:g.908510T>G
chr1:g.91375429C>T
chr20:g.46501516G>A
chr3:g.121770370A>G
chr8:g.29009156G>T
chr20:g.24969603delC
chr6:g.89950927T>C
chr3:g.13504524delCA
chr3:g.51392610G>A
chr5:g.1294230G>A
chr11:g.44052727G>A
chr1:g.161162063C>A
chr7:g.2919488G>A
chr1:g.160945135C>A
chr11:g.94607439G>A
chr7:g.130173874G>A
chr1:g.110340619T>G
chr12:g.55936909T>C
chr1:g.109171879C>T
chr1:g.20780427_20780428insT
chr14:g.58647100G>A
chr20:g.63659431C>A
chr4:g.154236145G>A
chr5:g.81255190G>A
chr8:g.123255938G>A
chr4:g.87046864C>A
chr19:g.11415953C>T
chrX:g.3029249T>C
chr1:g.152313438C>A
chr6:g.28579342G>A
chr12:g.112074730C>T
chr11:g.55773810T>A
chr1:g.201413106G>T
chr4:g.103589806C>T
chr6:g.27838682C>T
chr9:g.36227454T>C
chr12:g.130442152C>T
chr12:g.119674053C>T
chr7:g.138728822G>A
chr6:g.29461744C>G
chr4:g.40790685C>T
chr12:g.118391156G>A
chr1:g.21862059G>A
chr17:g.40982429C>A
chr4:g.159355959G>A
chr8:g.19955882C>A
chr17:g.60067661A>G
chr8:g.85328632G>A
chr22:g.50739792A>G
chr17:g.74744739C>T
chr22:g.20779266G>A
chr19:g.54709097C>T
chr1:g.157841752C>A
chr5:g.140128768G>A
chr19:g.56578164T>C
chr19:g.15879642C>T
chrX:g.8465366G>A
chr7:g.100854214C>G
chr3:g.70988035G>A
chr9:g.100442023A>C
chr19:g.10137909C>A
chr22:g.19357000G>T
chr1:g.64844802T>A
chr8:g.29188596C>A
chr3:g.148741042C>A
chr17:g.41366618G>A
chr7:g.98957993A>G
chrX:g.73213077G>A
chr11:g.69295635G>A
chr22:g.39101960C>T
chrX:g.84469102C>T
chr1:g.37761710G>A
chr4:g.103719403C>T
chr22:g.37373220C>T
chr2:g.61872218C>T
chr2:g.171844497C>A
chr2:g.218429636C>T
chr16:g.66398468A>C
chr1:g.109271464C>T
chr2:g.39035307T>C
chr5:g.42800580T>A
chr2:g.195876608A>G
chr11:g.118104694G>A
chr15:g.39584046C>G
chrX:g.80026833G>T
chr19:g.17835138C>T
chr12:g.84883681T>C
chr11:g.65714631A>T
chr9:g.33462632C>A
chr6:g.30260605C>T
chr17:g.48895292G>T
chr14:g.49654209C>T
chr19:g.51994141C>T
chr12:g.106314409G>T
chr19:g.51993804T>C
chr11:g.64796997_64796998insG
chr6:g.158062021C>T
chr4:g.156763019G>A
chr2:g.88126210C>G
chr6:g.31966839delA
chr3:g.101275690C>T
chrX:g.53558993C>A
chr19:g.40015693A>G
chr14:g.24267761G>A
chr5:g.115841389_115841390insT
chr17:g.28704316C>T
chr2:g.135808573G>C
chr12:g.105144426G>A
chr12:g.132639201G>A
chr15:g.42327447G>T
chr3:g.187729741T>A
chr1:g.10324759C>T
chrX:g.312825C>T
chr17:g.74355224G>A
chr13:g.23330128A>C
chr5:g.140786742G>A
chr1:g.197090295G>A
chr10:g.80644015G>T
chr7:g.87935066delC
chr17:g.38740431G>C
chr11:g.121168713delCTT
chr10:g.14923075A>C
chr16:g.89532053G>A
chr13:g.48360068delTA
chr17:g.28673475G>A
chr3:g.52788066G>A
chr1:g.150796888T>G
chr6:g.111601202G>A
chr6:g.31862729C>T
chr11:g.5581040A>G
chr7:g.100752941G>A
chr1:g.54212653T>C
chr3:g.129038839G>A
chr18:g.74634058C>A
chr1:g.6532060G>T
chr11:g.70182598A>C
chr11:g.19240132C>T
chr10:g.112283790C>T
chr19:g.57291993C>T
chr6:g.128519117delAG
chr11:g.59503918C>G
chr8:g.58635511G>A
chr5:g.169263637G>A
chr19:g.7745987C>T
chr1:g.175098351C>T
chr1:g.248453238C>T
chr8:g.85134935C>T
chr8:g.37872691T>G
chrX:g.35802648T>A
chr2:g.241212169A>T
chr1:g.94892315T>A
chr12:g.52898722C>T
chr17:g.69114866C>T
chr17:g.58415338T>C
chr1:g.154345064A>C
chr5:g.140675132G>A
chr2:g.131533286C>T
chr2:g.115777284A>C
chr19:g.57445008C>A
chr2:g.96287009T>C
chr3:g.53821749T>C
chr22:g.33316139T>A
chr7:g.87843768C>T
chr7:g.127595454C>T
chr7:g.51017412C>T
chr7:g.128854486C>T
chr11:g.18174098G>A
chr12:g.66541837G>A
chr9:g.26995721G>A
chr19:g.8403498C>T
chr4:g.150248307A>C
chr12:g.95209321C>T
chr21:g.45468501C>T
chr6:g.41154066G>A
chr6:g.26017030C>T
chr1:g.39459239G>A
chr1:g.233262122G>A
chr20:g.18162180G>T
chr4:g.4279503G>T
chr17:g.74920445G>T
chr19:g.54936312A>T
chr6:g.30664803C>A
chr17:g.39665409G>A
chr9:g.113595722A>T
chr10:g.102594028delG
chr20:g.31770380C>A
chr15:g.70684327C>A
chr17:g.35441332T>C
chr17:g.5092877T>G
chr12:g.103654591A>C
chr4:g.76115431C>T
chr12:g.6438828C>T
chrX:g.102656433A>T
chr10:g.131973873A>T
chr8:g.69705120A>G
chr19:g.57131308A>G
chr12:g.75048182G>A
chr16:g.29968069A>G
chr1:g.46814021C>T
chr1:g.247157009G>A
chr2:g.167247033C>T
chr17:g.34287118C>T
chr6:g.135201696G>T
chr5:g.141200894G>A
chr1:g.1333278C>T
chr1:g.154000880C>A
chr9:g.98119180G>C
chr3:g.46203292G>T
chr2:g.130764136C>T
chr1:g.109355386C>T
chr9:g.96819662G>A
chr2:g.199925083C>T
chr19:g.45472973T>G
chr13:g.23355574C>T
chr14:g.54784610C>T
chr18:g.57357183C>T
chr2:g.127481145G>A
chr6:g.100638717G>C
chr3:g.139369365delT
chr10:g.104315557T>A
chr1:g.215741487G>A
chrX:g.45069734G>A
chr1:g.52360180A>C
chr9:g.76706756T>G
chr15:g.66495411delT
chr5:g.141414940G>A
chr20:g.53576986G>A
chr3:g.123291236C>A
chr18:g.63930110G>A
chr19:g.2015359C>T
chr11:g.47415404G>T
chrX:g.136350124C>T
chr5:g.58459035C>T
chr5:g.56923716G>A
chr2:g.218267590C>G
chr1:g.3833902G>T
chr3:g.183762221A>T
chr8:g.144086047C>T
chr2:g.86771609C>A
chr2:g.47806952G>T
chr18:g.31339796_31339797insG
chr7:g.148614237C>T
chr4:g.182792283C>T
chr19:g.49375102C>A
chr16:g.3731902C>G
chr21:g.39218652G>A
chr14:g.34765123C>T
chr19:g.38838399C>T
chr2:g.241230800C>A
chr2:g.240717306G>A
chr9:g.35390649T>A
chr17:g.65197194C>T
chr9:g.32784240C>A
chr14:g.81143681C>T
chr12:g.7124679C>G
chr5:g.129704278G>A
chr6:g.43305845A>C
chr17:g.42762361C>T
chr11:g.68262823C>T
chr9:g.21350860C>T
chr1:g.78917680T>C
chr11:g.47351428G>A
chr16:g.88658710G>A
chr8:g.142344279G>A
chr9:g.133732562T>C
chr11:g.92801876G>A
chr11:g.22376013C>T
chr14:g.31107030C>A
chr9:g.131077205G>A
chr6:g.160104682G>T
chr19:g.7561075C>T
chrX:g.2949496G>A
chr17:g.39766470delC
chr5:g.637591C>G
chr7:g.150286533T>C
chr1:g.35190949delG
chr4:g.26481892G>A
chr5:g.36680494C>G
chr17:g.7833189G>A
chr1:g.44129510A>T
chr19:g.54814001T>A
chr6:g.89161891G>A
chr17:g.35170149G>A
chr8:g.97851411G>A
chr5:g.2747561C>T
chr11:g.90035432C>G
chr4:g.176729559G>A
chr2:g.102423332G>T
chr12:g.72272856A>G
chr11:g.1192152G>A
chr12:g.52491553T>A
chr10:g.75029715C>T
chr17:g.58661542A>G
chr19:g.44428681G>C
chr2:g.91781122G>A
chr17:g.6472777C>T
chr11:g.57308943C>T
chr10:g.62091850T>A
chr7:g.122702651C>T
chr19:g.9529633C>A
chrX:g.77005404C>T
chr7:g.18585366G>T
chr8:g.100573873C>A
chr18:g.13885211T>C
chr1:g.31813988C>T
chr1:g.100913722G>T
chr1:g.215577674G>A
chr16:g.66609796G>T
chr22:g.16827649C>T
chr8:g.123645906C>T
chr21:g.40339335T>G
chr1:g.81979954A>G
chr21:g.29642861G>A
chr6:g.26055919_26055920insG
chr19:g.46411708C>T
chr4:g.122927675C>T
chr16:g.70333659C>T
chr11:g.12204397C>T
chr7:g.129206235A>G
chr12:g.56179041T>C
chr7:g.144004612A>G
chr2:g.75655357A>G
chr13:g.77098347C>A
chr11:g.119048274C>T
chr7:g.99051422C>A
chrX:g.153941955T>G
chr13:g.51865595C>T
chr11:g.77160215G>A
chrX:g.151717321G>T
chr10:g.70775196C>T
chr10:g.99533290G>A
chr12:g.67657963G>T
chr11:g.117994035C>A
chr1:g.152307362T>G
chrX:g.53194684G>A
chr5:g.150251811G>C
chr14:g.106335327A>T
chr2:g.113499676C>T
chr9:g.110407459G>A
chr14:g.37812434G>T
chr5:g.71012638G>T
chr6:g.150830798G>A
chr10:g.69248670C>T
chr9:g.72909710A>G
chr9:g.104617416C>T
chr19:g.19260876A>G
chr11:g.14645007G>A
chr10:g.829536C>A
chrX:g.123668292A>C
chr2:g.176117179T>G
chr11:g.119188833G>T
chr17:g.21028664C>T
chr8:g.118439930G>A
chr9:g.32419134A>C
chr1:g.45007547C>T
chr14:g.75046681T>G
chr2:g.219461880A>T
chrX:g.55623880C>T
chr17:g.32764949T>C
chr2:g.78413052A>T
chr12:g.72621169T>A
chr7:g.100399316C>T
chr1:g.173825267G>C
chr11:g.66624599G>A
chr1:g.230351055A>C
chr17:g.44748419G>T
chr17:g.76021885G>A
chr6:g.43675512T>C
chr12:g.57165915G>A
chr1:g.15932478T>G
chr7:g.6747091_6747092insT
chr12:g.3280404A>G
chr5:g.68295315delAATACTTGATGT
chrX:g.11775073T>C
chr8:g.55773681T>G
chr19:g.50793933G>A
chr5:g.95891256G>A
chrX:g.14581376C>T
chr9:g.92649571G>C
chr15:g.25193373A>C
chr21:g.32603038C>T
chr14:g.103336676G>C
chr19:g.34454311C>T
chr5:g.140857674G>A
chr5:g.72196304T>G
chr18:g.70148965C>A
chr18:g.76379043G>A
chr17:g.76744361T>C
chr3:g.119811496A>G
chr1:g.198703436G>T
chr3:g.184179041G>C
chr22:g.36872395C>G
chr12:g.122716455_122716456insG
chrX:g.154188054G>A
chr2:g.73088179C>T
chr12:g.6922840C>T
chr6:g.32851060G>A
chr7:g.42920066C>A
chr12:g.6318968C>A
chr2:g.1649205A>C
chr19:g.49710403A>C
chr12:g.109951030G>A
chr15:g.89806338G>A
chrX:g.153725441G>A
chr1:g.153777099C>G
chrX:g.50635059G>A
chr10:g.5749741A>G
chr10:g.27208428A>G
chr9:g.115086790A>C
chr14:g.69091864T>C
chr14:g.101562270C>T
chr10:g.50213011G>A
chr1:g.153772363T>A
chr12:g.49973228C>T
chr18:g.63661136G>T
chr2:g.120988215C>G
chr17:g.11744805C>T
chr2:g.219549160A>C
chr20:g.21389403T>C
chr19:g.55182034C>T
chrX:g.133026790T>G
chr1:g.156293371G>A
chr19:g.12111458C>T
chr3:g.101361788T>G
chr11:g.67502657G>T
chr19:g.48663333G>A
chr20:g.32431402T>C
chr1:g.237887475G>A
chr16:g.21836570A>T
chr7:g.143183888T>C
chr11:g.125893981C>T
chr6:g.25914602G>A
chr1:g.167005351C>T
chr11:g.7043749T>C
chr1:g.109355370T>A
chr5:g.23527321G>T
chr12:g.48831173A>T
chr9:g.98083069T>A
chr14:g.102038581T>G
chr19:g.42925791C>T
chr16:g.68232703A>T
chr4:g.188139571G>T
chr16:g.68828226G>A
chr13:g.112526980A>T
chr14:g.21523715C>T
chr7:g.18027015T>A
chr12:g.7096595G>T
chr1:g.41048850G>A
chr3:g.48380866_48380867insA
chr17:g.78050284G>T
chr22:g.33006548C>T
chr4:g.119057510G>A
chr4:g.74381134G>A
chr2:g.173232387G>C
chr4:g.48860828T>A
chr3:g.53878380G>A
chr11:g.3776015C>T
chr10:g.123798082C>T
chr5:g.114496111C>T
chr7:g.7585800G>A
chr1:g.152355525delTG
chr3:g.57556776G>A
chr22:g.19385529T>A
chr20:g.64027098G>T
chr1:g.150346135G>A
chr6:g.166158451G>A
chr5:g.23522682G>A
chr11:g.117246882A>G
chr20:g.59023547G>T
chr3:g.13319926C>G
chr5:g.136357266G>A
chr4:g.70196702A>T
chr4:g.87185319C>G
chr18:g.35368427G>A
chr9:g.67900818C>A
chr1:g.39567818T>A
chr5:g.178149709C>G
chrX:g.47565057C>T
chr16:g.24777190C>T
chr13:g.45713426G>A
chr21:g.10413602T>C
chr1:g.86372454T>A
chr11:g.128484933G>A
chr19:g.39298560A>G
chrX:g.105909820C>T
chr8:g.93922454G>C
chr17:g.20902318G>A
chr5:g.141151830T>G
chr2:g.120927392G>A
chr7:g.75511012G>A
chr9:g.133364949A>G
chr6:g.169659110C>T
chr14:g.104943022G>A
chr1:g.17226102T>G
chr3:g.16175116G>A
chrX:g.30559653A>C
chr21:g.30598783C>A
chr14:g.22842639T>A
chr7:g.4233292G>A
chr12:g.66353473G>A
chr2:g.232484996C>A
chr1:g.27755324G>T
chr17:g.75492615A>T
chr19:g.35151353G>C
chr19:g.12350207G>A
chr6:g.129453047G>C
chr2:g.26467433G>C
chr4:g.122186102C>T
chrX:g.130172142C>T
chr15:g.40459646G>A
chrX:g.77558716G>A
chr13:g.110155364C>G
chr19:g.49539174A>G
chr1:g.20666230G>A
chr2:g.202819862C>T
chr1:g.100107868T>C
chr7:g.148415482C>T
chr11:g.66365938A>C
chr20:g.45252402C>T
chr1:g.180189564C>G
chr1:g.158643359C>A
chr15:g.43037814C>T
chr15:g.77133573T>A
chr11:g.33551127G>A
chr4:g.77819306delCATTCTCTTCCTCTGGCCCAGAAGCAACAG
chr16:g.67657625G>T
chr19:g.6916325delG
chr19:g.10560335T>C
chr1:g.179107669T>G
chr11:g.237014C>T
chr4:g.56973329T>A
chr19:g.54818382T>A
chr5:g.9119008G>A
chr3:g.160102593T>A
chrX:g.135022151C>T
chr19:g.37697128A>T
chr15:g.34942015C>A
chr5:g.33641831T>A
chr5:g.79734445T>G
chr17:g.28491555C>T
chr3:g.49057623G>C
chrX:g.120608224G>A
chr1:g.150757888G>A
chr3:g.170498870A>T
chr15:g.42396804A>G
chr2:g.61854043G>A
chr1:g.210775384G>A
chr22:g.50522190T>C
chr7:g.116505975T>G
chr6:g.33068660C>T
chr15:g.68289965G>C
chr10:g.61410487C>T
chr15:g.101048585T>G
chr5:g.140674318C>T
chr8:g.142701623T>C
chr1:g.148953672C>A
chr10:g.97666510C>T
chr12:g.52601210G>A
chr4:g.86775315A>G
chr7:g.93426523G>A
chr21:g.44900326G>A
chr10:g.46645179C>T
chr22:g.43716711G>A
chr22:g.26464621T>A
chr9:g.66989975T>A
chr4:g.82460099A>C
chr14:g.92006091G>A
[truncated: 8,000 more rows]

## Sheet: KIRC
chr1:g.76576946_76576947insAAAC
chr3:g.195783009C>T
chr3:g.10142050C>A
chr3:g.10146516C>A
chr3:g.10142179G>A
chr14:g.18974884_18974885insTTTTTA
chr3:g.195783008A>G
chr3:g.10146556T>A
chr3:g.195780140G>A
chr12:g.7317140C>T
chr4:g.175701656G>A
chr4:g.27021058delAA
chr3:g.10146637G>T
chr3:g.52609752G>A
chr10:g.45826548G>A
chr3:g.10149888G>T
chr1:g.11128107G>C
chr3:g.10146513G>T
chr3:g.10149874T>C
chr1:g.11157173C>A
chr12:g.6667680T>A
chr3:g.195782300G>A
chr3:g.10146561G>T
chr7:g.100464092T>G
chr1:g.144436988C>A
chr3:g.10149829T>C
chr3:g.10149796T>C
chr3:g.10149804C>T
chr2:g.74415138_74415139insCGCGGAGGGGCGGGGGGCGCCGCC
chr12:g.57225636G>A
chr8:g.2096254_2096255insTCCCA
chr1:g.145578886T>C
chr3:g.10142041C>A
chr15:g.101759755C>G
chr3:g.49686748C>G
chr2:g.3679944C>T
chr1:g.148536242A>T
chr13:g.36231153delAA
chr12:g.51364237G>C
chr19:g.38119344G>C
chr3:g.10149886T>C
chr3:g.195783083G>C
chr3:g.10146625T>C
chr3:g.52409876C>T
chr17:g.64503981delACAG
chr3:g.10142068T>A
chr3:g.10146520delT
chr6:g.33575422G>A
chr16:g.1777747C>G
chr10:g.45827364T>G
chr17:g.37731734G>C
chr3:g.10142064C>T
chr5:g.84060409G>A
chr16:g.20478602_20478603insC
chr3:g.10142110G>A
chr3:g.10149798delA
chr3:g.10146606C>T
chr9:g.66990479C>G
chr3:g.10149840G>T
chr3:g.52609638delC
chr3:g.10149786G>T
chr1:g.11157242A>G
chr3:g.10149815delG
chr3:g.10142079A>G
chr3:g.52609332G>A
chr11:g.1097335C>T
chr3:g.10149795C>G
chr8:g.47849482C>T
chr6:g.117288614C>G
chr1:g.146984822G>T
chr11:g.46902820G>T
chr7:g.158133755T>A
chr6:g.32974686T>C
chr1:g.175396702G>A
chr15:g.81299572G>A
chrX:g.74741021C>A
chr4:g.1745027G>T
chr2:g.7024442G>C
chr7:g.34719084C>T
chr17:g.10529481G>A
chr2:g.237344398delG
chr6:g.33725566G>C
chr15:g.55548983C>T
chr4:g.127687810_127687811insCC
chr11:g.5046963T>C
chr7:g.139716160T>C
chr5:g.111092530A>T
chr12:g.54632351G>A
chr9:g.136898787delAGCCCGG
chr12:g.121858834A>T
chr22:g.31268154C>T
chr8:g.13214728C>A
chr2:g.201682907T>G
chr11:g.108330386A>T
chrX:g.54757416_54757417insTCTGGC
chr3:g.52326855delC
chr7:g.86765065T>A
chr2:g.37227610A>C
chr2:g.39058748G>T
chr3:g.185926619C>T
chr6:g.29374509C>T
chr6:g.33319115G>C
chr20:g.59301690C>T
chr16:g.69647562A>T
chr19:g.57779334T>C
chr12:g.102402430A>G
chr10:g.95664063T>A
chr3:g.47037779T>A
chr20:g.31476557T>G
chr9:g.122371140G>A
chr8:g.12729261A>C
chr5:g.150069958C>G
chr5:g.148101859C>A
chr8:g.142874170C>A
chr4:g.20488954G>A
chr15:g.73947144A>G
chr4:g.183253918delA
chr18:g.45860178G>T
chr5:g.17354348T>A
chr17:g.73208269G>A
chr1:g.153813296G>A
chr8:g.17210391A>G
chr3:g.52634650delGGGTATTTTTTCTTTGAAGGCAAATGGTAAAAAGGTTCAGCTATTAGCTGCC
chr16:g.27449153G>T
chr4:g.183038815T>G
chr15:g.78485825A>G
chr7:g.96146690C>T
chr1:g.19155529T>C
chr4:g.73076157A>G
chr10:g.30026736G>A
chr1:g.34212360C>G
chr1:g.201060768T>G
chr14:g.104948660T>C
chr1:g.169864443A>G
chr19:g.17341756G>A
chr6:g.129342374G>C
chr19:g.1785556G>A
chr10:g.46013569C>T
chr9:g.100293000delA
chrX:g.44272754T>C
chr1:g.211674438_211674439insGG
chr12:g.12824712A>T
chr6:g.36684380G>C
chr10:g.5456097T>C
chr10:g.114547715C>T
chr17:g.15738345A>G
chr17:g.35981439C>T
chr11:g.9425207G>A
chr2:g.175093246G>C
chr8:g.55454354C>T
chr1:g.205620477T>C
chr14:g.59355311G>A
chr14:g.92003785C>T
chr2:g.229546965G>T
chr7:g.117791586A>C
chr18:g.63588686G>A
chr9:g.128936457delC
chr17:g.18026287C>A
chr11:g.62977254C>T
chr14:g.77378370A>C
chr19:g.8959620T>G
chr3:g.101319614C>A
chr16:g.47547517_47547518insGAAAC
chr7:g.35104737T>A
chr3:g.15685225C>A
chr10:g.73849259delACCTTCAGGTCCCTG
chr6:g.167137275G>A
chr20:g.36432112G>A
chr4:g.159354008A>T
chr6:g.65353521G>T
chr5:g.138567712C>T
chr2:g.19897965delAATC
chr2:g.241672161G>T
chr22:g.18173208_18173209insGAC
chr19:g.57365175T>G
chr20:g.34941779G>T
chr1:g.241999030T>C
chr22:g.46367108A>T
chr8:g.112346176C>A
chr16:g.17200617G>A
chr19:g.39734439G>A
chr12:g.52520063A>G
chr8:g.54628033T>G
chr2:g.15468438delTAATCCA
chr15:g.64088793C>A
chr1:g.150460117C>T
chr4:g.152352830C>A
chr8:g.119832626delTT
chr20:g.1181538_1181539insG
chr18:g.70135267delAAATATTAAGGA
chr17:g.1725718G>A
chr6:g.168040179G>A
chr10:g.116886535_116886536insT
chr8:g.17551915G>A
chr10:g.71716141G>C
chr1:g.171541193G>A
chr14:g.35834862G>T
chr19:g.35450521C>T
chr15:g.36817884T>G
chr6:g.4133556T>C
chr12:g.10985985C>T
chr12:g.21863024_21863025insATCAATTCTTT
chr5:g.1073651C>T
chr19:g.11447502C>T
chr21:g.31686231A>C
chr15:g.90749717C>T
chr12:g.122054836G>C
chr19:g.42739019A>T
chr20:g.51009590G>A
chr19:g.11033434G>A
chr2:g.178693993G>T
chr13:g.21140515delA
chr13:g.77243100C>G
chr19:g.45616479G>A
chr2:g.127650022G>A
chr2:g.37028723G>A
chr9:g.76703848T>C
chr19:g.47698645_47698646insT
chr17:g.32338252T>G
chr22:g.23801005T>A
chr1:g.169707369C>A
chr6:g.129478762T>C
chr17:g.10357828C>T
chr1:g.197190814G>T
chr1:g.15931500G>A
chr13:g.45337185A>T
chr20:g.58910002C>T
chr9:g.33918097_33918098insAACAAAG
chr17:g.58525720C>A
chr6:g.3225584C>T
chr11:g.66690236A>T
chr19:g.2794800C>T
chr10:g.93316769G>C
chr22:g.22488986_22488987insTAAACAGCATAA
chr19:g.58037897G>T
chr11:g.5422865T>C
chr3:g.44775299T>C
chr9:g.104504618C>T
chr6:g.107772338G>C
chr16:g.70860081T>G
chr9:g.110407598G>C
chr2:g.88885849G>A
chr17:g.45246896G>C
chr2:g.55262364T>C
chr14:g.75047170T>G
chr7:g.140024838A>G
chr12:g.96280508C>T
chr20:g.57515797C>T
chr14:g.94378345G>A
chr5:g.150553503C>G
chr22:g.20994492G>A
chr20:g.19685294G>C
chr3:g.169116018C>A
chr10:g.69930407G>A
chr6:g.42746065G>A
chr15:g.98649647G>A
chr17:g.39715296_39715297insC
chr14:g.33799816G>A
chr17:g.74854583C>T
chr12:g.4276138C>G
chrX:g.141906425C>T
chr1:g.227091990_227091991insTGTTTTGAATTGTGTT
chr17:g.16061484A>G
chr7:g.90726775A>T
chr1:g.216207418T>G
chr4:g.2755974_2755975insCT
chr15:g.83136535A>G
chr6:g.33211810A>G
chr8:g.131944752T>G
chr12:g.109802999T>C
chr11:g.85726423_85726424insGAGAAATTAA
chr8:g.143589886G>A
chr14:g.63990544delT
chr7:g.88165888C>A
chr11:g.4769653A>T
chr15:g.80925704A>T
chr12:g.57098836C>G
chr19:g.15265505A>T
chr2:g.172570780A>G
chr10:g.95238620T>A
chr1:g.11109318A>C
chr1:g.78135828A>G
chr5:g.34811041_34811042insGTATCTGGTC
chr21:g.29066727A>G
chr1:g.206584441C>T
chr7:g.38249489_38249490insGTTTACACATA
chr4:g.39477190_39477191insTTATATTTT
chr17:g.17907531T>A
chr16:g.19551280_19551281insTTTTCTAT
chr7:g.116917880A>G
chr9:g.35563224A>G
chr17:g.6483573G>A
chr12:g.209810G>C
chr2:g.215433408T>G
chr19:g.11021846C>A
chr1:g.186341079T>G
chr14:g.106154137C>T
chr17:g.45143472A>G
chr19:g.8958543G>A
chr12:g.18738661C>T
chr1:g.149887748C>G
chr20:g.19974824G>T
chr4:g.145539899_145539900insATAAAGTAAAACATAATC
chr4:g.154297999A>T
chr5:g.173890565C>G
chr4:g.154235650G>A
chr22:g.31713375delA
chr1:g.94098821G>T
chr16:g.15634968G>C
chr9:g.132687297_132687298insCTTAGC
chr17:g.20247267T>A
chr8:g.105798857C>A
chr5:g.140967260C>A
chr6:g.89162281_89162282insA
chr15:g.85769056C>T
chr19:g.55593266C>T
chr11:g.205968A>G
chr3:g.150666875C>A
chr1:g.155752365A>G
chr7:g.101216779C>A
chr16:g.46747965C>T
chr18:g.26292327G>A
chr3:g.138655461C>A
chr2:g.218960471C>T
chr19:g.1074199A>T
chr13:g.41887282delGGCAAGCCCAA
chr11:g.65129840T>C
chr15:g.86522928C>A
chr15:g.99792165C>A
chr2:g.188297538_188297539insTTTGT
chr2:g.86038718A>C
chr17:g.74473599A>C
chr5:g.65624211C>T
chrX:g.73447372C>T
chr1:g.23695852A>T
chr1:g.38998262_38998263insGTGAGTGCTGAGGAGTGAGGTTGAC
chr7:g.44073849T>C
chr11:g.119189200G>C
chr6:g.106539503A>G
chr3:g.101592860T>C
chr19:g.55955677G>T
chr17:g.38328227G>T
chr11:g.105026865C>A
chr4:g.46123952C>T
chr8:g.94170931G>T
chr14:g.20770540C>T
chr6:g.42890456G>C
chr3:g.52407246A>C
chr6:g.87016194G>A
chr20:g.62327548G>A
chr1:g.220143062C>T
chr18:g.48948433A>G
chr1:g.158181494C>G
chr11:g.123727540C>T
chrX:g.72206322T>A
chr7:g.35011450delCCTATTTTAAAAAATACAGAGG
chr19:g.11325576A>T
chr1:g.16937723A>G
chr9:g.76705000C>A
chr9:g.137021955G>C
chr21:g.39451998G>T
chr15:g.43190066A>C
chr12:g.50222248C>A
chr7:g.107932321G>T
chr4:g.38776296_38776297insAA
chr3:g.125313483G>T
chr9:g.35075007C>G
chr12:g.49185230C>T
chr10:g.43163915A>G
chr1:g.156243177G>A
chr11:g.60070203G>A
chr7:g.100813193A>G
chr16:g.67868624G>A
chr17:g.32659126C>T
chr5:g.71470402_71470403insATGTTTTTTTTAGCTG
chr1:g.37878335A>G
chr19:g.34741862G>A
chr5:g.32089691C>T
chr21:g.39178483delT
chr7:g.127584693G>A
chr11:g.102716417_102716418insACAGGTATAAAATTGAAATATT
chr17:g.19283404G>A
chr12:g.105143226A>G
chr18:g.21574367_21574368insT
chr16:g.28169794T>C
chr2:g.169650413_169650414insAAGATATTAAAAACAATGTATGAATTA
chr8:g.102651854C>A
chr6:g.37658415C>T
chr1:g.157841686A>G
chr15:g.42689747T>C
chr4:g.143415598G>T
chr3:g.57557213T>C
chr20:g.18145310G>T
chr6:g.158502726G>C
chr1:g.86735113A>T
chr15:g.48136658A>C
chr12:g.57197592G>A
chr5:g.140849776G>A
chr4:g.73258634G>A
chr19:g.38536068_38536069insAGTAAACCATCTA
chr1:g.41583317C>T
chr14:g.74862549A>C
chr1:g.53220339G>C
chr16:g.670686G>A
chr1:g.90010280T>G
chr19:g.3813941C>G
chr14:g.74290402C>G
chr14:g.71699009A>T
chr19:g.39840314A>T
chr11:g.57704432C>G
chr15:g.40930117G>T
chr15:g.49130814G>T
chrX:g.129752162C>A
chr12:g.56093789A>G
chr14:g.68887873_68887874insTA
chr7:g.130207932T>G
chrX:g.77683632C>G
chr21:g.45222188C>A
chr2:g.75051323T>A
chr21:g.42477307G>A
chrX:g.154420709C>G
chr8:g.134610638C>G
chr16:g.3676075A>G
chr1:g.90939413_90939414insCAAAAACCTAAG
chr19:g.53503483T>A
chrX:g.153794319A>G
chr5:g.40852376G>A
chr6:g.150832002T>C
chr11:g.62140926T>C
chr16:g.55531969A>T
chr7:g.44113959A>G
chr14:g.105845571C>T
chr12:g.26914013G>C
chr11:g.62993347A>G
chr7:g.157385668delA
chr3:g.194457172C>T
chr9:g.21217254A>C
chr3:g.52550536delA
chr9:g.34725630C>G
chr17:g.30893488T>A
chr21:g.32769825G>A
chr13:g.51937539C>T
chr4:g.69214854A>T
chr4:g.67854127G>A
chr2:g.38748642C>A
chr4:g.150683596T>C
chr8:g.25484067_25484068insCTATAATTAGACAATAAA
chr7:g.147485979C>G
chr13:g.85794714G>A
chr15:g.72353079G>T
chr11:g.119101364C>A
chr7:g.88210104_88210105insGTAGAAGTAAGTTGATTTTTATTTTT
chr11:g.117315611T>C
chr16:g.68022834C>G
chr13:g.101111198C>T
chr1:g.31424725delCTGCAGGGCCACATCGA
chr12:g.57104752A>G
chr9:g.113392142G>T
chr15:g.25713987C>T
chr17:g.58543033A>T
chr5:g.168671197C>G
chr16:g.1944676C>A
chr12:g.47743665T>C
chr6:g.157322776C>T
chr1:g.171591804C>A
chr12:g.27646139C>T
chr11:g.108256336delC
chr17:g.28353733delAGTA
chr4:g.108746782T>C
chr18:g.74442011delA
chr6:g.54389863T>C
chr19:g.6714011C>A
chr7:g.87454578_87454579insGCAGG
chr21:g.36461396G>A
chr12:g.2486154C>T
chr5:g.90759493G>A
chr6:g.149702044C>T
chr19:g.52322586C>G
chr1:g.186358612G>A
chr7:g.4130079G>C
chr6:g.46694007A>T
chr1:g.176085871T>C
chr17:g.43853972C>G
chr11:g.106810438G>A
chr10:g.87714129A>G
chr17:g.75209822_75209823insA
chr9:g.122526995T>C
chr11:g.9853694A>C
chr1:g.149929130T>A
chr14:g.23955088T>G
chr2:g.64458473C>A
chr6:g.33726838G>A
chr2:g.218814404C>A
chr19:g.21536880A>C
chr15:g.85116095A>T
chr15:g.59075975delAGCA
chr17:g.70175538G>A
chr3:g.197044529G>A
chr20:g.59767365G>A
chr10:g.101798066T>C
chr17:g.28924397_28924398insCT
chr17:g.63824389T>C
chr17:g.10539442A>G
chr12:g.10883097C>T
chr15:g.49424552delA
chr19:g.46678478G>A
chr3:g.165786181A>T
chr7:g.43463684T>C
chr22:g.16968352T>A
chr2:g.200997430A>G
chr4:g.55113414delA
chr1:g.11128120T>A
chr19:g.53408221A>G
chr17:g.12894964_12894965insAGTAGAAACATTTAATAAGAGAATAGAGAAAACTA
chr20:g.57610199C>T
chrX:g.50086843C>T
chr21:g.41990981delATGTGATTG
chr19:g.45059297C>A
chr8:g.109465160C>T
chr2:g.178570941G>C
chr2:g.127720126T>A
chr6:g.49786885G>A
chr15:g.60448879T>C
chr10:g.114136217_114136218insGAAAGAGAAATAGTG
chr7:g.142912542delG
chr9:g.135821966T>G
chr20:g.4182444T>C
chr3:g.56616213A>T
chr8:g.112685701_112685702insTGCCTGTCT
chr3:g.142312621G>A
chr15:g.78273108A>G
chr11:g.76545905C>G
chr11:g.10763644A>G
chr16:g.70262452delC
chrX:g.71121331G>T
chrX:g.54758844G>A
chr13:g.20064516G>C
chr9:g.130135023A>G
chr17:g.18971025T>C
chr16:g.31149495A>G
chr1:g.234446832C>T
chr2:g.209820371G>A
chr4:g.133150395C>A
chr6:g.50043681G>T
chr7:g.127374045_127374046insT
chr4:g.105369685A>T
chr2:g.126696067T>G
chr9:g.132907306delC
chr4:g.159268142T>C
chrX:g.73831177C>A
chr3:g.10146564A>T
chr7:g.152176566G>A
chr10:g.37133927T>G
chr18:g.48761469_48761470insCAACAGCAGCAACGTGGACACCAAGCTCACCACCTTCATGT
chr6:g.43645270T>C
chr4:g.890609T>C
chr19:g.7745018G>T
chr3:g.52550499delA
chr11:g.119046706G>A
chr17:g.39875341G>A
chr12:g.102077425delC
chr17:g.36211871T>G
chr21:g.17594273delTGGCTTTTTTCTGGGCAAAGGG
chr15:g.62686778A>G
chr2:g.48582295G>A
chrX:g.17750189G>T
chr6:g.152722258G>A
chr1:g.224411473G>T
chr1:g.109252497C>T
chr20:g.18056706T>C
chr17:g.72123560C>G
chr15:g.42164368A>T
chr16:g.21599802G>C
chr12:g.111749189C>T
chr18:g.63637803_63637804insAA
chr5:g.141193930G>T
chr9:g.133656476G>A
chr6:g.83137715C>T
chr6:g.42828535C>T
chr2:g.11771512C>A
chr1:g.149936246T>G
chr2:g.159431088C>A
chr20:g.23397162C>G
chr11:g.55891213G>T
chr12:g.48343425C>T
chr3:g.50253029C>T
chr8:g.60820055A>T
chr17:g.50606231G>A
chr3:g.10149964G>T
chr2:g.3388585G>A
chrX:g.9692162delG
chr6:g.28999573delT
chr13:g.26215078C>A
chr17:g.4933305G>A
chr11:g.85704992A>C
chr11:g.12327263G>A
chr1:g.40987450_40987451insGAGAGT
chr14:g.20640849C>T
chr1:g.108852044G>T
chr12:g.66338078G>A
chr22:g.42209826G>T
chr3:g.187728459G>A
chr14:g.44962911C>T
chr3:g.122795239delGGCCCGGGCTCGGGC
chr19:g.54333652G>C
chr1:g.247841425G>T
chr11:g.61345907A>G
chr17:g.17216430delA
chr10:g.88775144A>C
chr7:g.73434940G>A
chr2:g.135920602T>C
chr16:g.31377232C>T
chr9:g.76823648A>G
chrX:g.147230826delA
chr2:g.169674665delG
chr2:g.53949259T>A
chr5:g.141370983A>T
chr20:g.22582156C>T
chr3:g.142425499delT
chr16:g.15617383G>C
chr15:g.42385851G>T
chr14:g.52652240T>G
chr6:g.113958701T>C
chr9:g.128389419C>G
chr19:g.52553868_52553869insCTTCCTGTTTTT
chr2:g.162288174T>G
chr11:g.58402817A>G
chr17:g.19283172C>T
chr1:g.182880549G>T
chrX:g.130013499_130013500insAAATGAAAGT
chr4:g.40354609A>G
chr10:g.89338859G>A
chr1:g.186308812C>G
chr5:g.80320110G>A
chr6:g.73644426T>G
chr6:g.165302157G>A
chr2:g.101269354_101269355insT
chr17:g.34155998C>T
chr1:g.229638050C>T
chr11:g.1092433C>A
chr12:g.52038748A>C
chr22:g.41530700delG
chr1:g.156273377T>A
chr6:g.28277074A>C
chr5:g.175685637G>T
chr13:g.102875680T>C
chr5:g.40852177_40852178insA
chr1:g.143904332G>C
chr9:g.83972903C>T
chr4:g.76022771A>G
chr1:g.56885928A>C
chr1:g.1353914T>A
chr2:g.233828918A>G
chr22:g.24502357G>A
chr17:g.58983091_58983092insCAGAAGGTGACAGATA
chr16:g.49638644A>T
chr15:g.88527603G>A
chr2:g.62501488C>G
chr14:g.23422276C>T
chr6:g.7395081C>T
chr10:g.116461046G>T
chr5:g.103276486G>A
chr1:g.75803743G>T
chr11:g.9508687A>T
chr5:g.76733056C>A
chr17:g.74743340G>T
chr9:g.132014380G>A
chr3:g.10142063C>A
chr10:g.97453656C>T
chr19:g.20118704C>G
chr16:g.68828233C>T
chr3:g.154255545T>C
chr11:g.129192140G>A
chr7:g.98205535G>T
chr12:g.6450573C>T
chr10:g.73796927T>C
chr20:g.33791321G>A
chr12:g.28484063G>T
chrX:g.151958656C>A
chr8:g.99502855A>T
chrX:g.55220599G>C
chr5:g.177386523delCAG
chr14:g.102085371T>C
chr16:g.1602467T>A
chr12:g.65170650A>T
chr17:g.5183408G>T
chr9:g.122477588delGAAACTGTC
chr13:g.87678360G>C
chr18:g.34129972_34129973insATAAATTAGG
chr16:g.24256899G>A
chr16:g.8750498G>A
chr5:g.141393647A>G
chr11:g.3825422G>A
chr14:g.64743319G>A
chr11:g.3699105G>C
chr7:g.72943075C>G
chr11:g.5706601T>C
chr3:g.184385196G>T
chr19:g.15116431G>T
chr19:g.4472293_4472294insCGT
chr8:g.39918087G>A
chr22:g.35659053T>C
chr5:g.138184944C>T
chr9:g.76502400C>T
chr5:g.132823038C>T
chr4:g.150590780C>A
chr17:g.58156029G>T
chr12:g.103938448A>G
chr7:g.99848236_99848237insATGATATTTTGTAAT
chr11:g.102865855A>C
chr6:g.43045299T>C
chr6:g.31729275A>T
chr3:g.52586501_52586502insC
chr8:g.93808956G>A
chr2:g.201348216delA
chr16:g.30766275G>T
chr18:g.62830065G>A
chr1:g.152306223C>T
chr12:g.84873317delC
chr2:g.27224797_27224798insATCTGG
chr2:g.121448955T>C
chr1:g.66946415A>T
chr19:g.49666057delC
chr19:g.17645789G>A
chr12:g.62493939T>A
chr17:g.1730481T>C
chr15:g.55679331delT
chr19:g.3600523C>T
chr7:g.18027223A>G
chr17:g.50575587C>T
chr7:g.30026513C>T
chr6:g.63711775A>G
chr2:g.73088617G>A
chr14:g.106578911T>G
chr7:g.32870112C>T
chr16:g.20964470G>A
chr8:g.36888526C>A
chr11:g.64928316G>A
chr2:g.173266691delC
chr4:g.70824308delC
chr9:g.131504324T>C
chr2:g.223598897G>A
chr1:g.39969517C>A
chr8:g.89958779delG
chr17:g.81918118C>T
chr2:g.218070605C>A
chr20:g.14325448T>C
chr12:g.28307718T>C
chr17:g.82748872T>C
chr3:g.184331345G>C
chr2:g.240576743G>A
chr1:g.152304974G>T
chr10:g.105255764G>T
chrX:g.134540428G>A
chr16:g.631423A>T
chr1:g.227767000G>A
chr1:g.149935066C>G
chr8:g.33499353_33499354insCATCCCAA
chr6:g.132588865G>T
chr16:g.90029072T>A
chr2:g.102797860C>A
chr1:g.37989553G>A
chr3:g.10146561G>C
chr17:g.35578196G>A
chr10:g.113614843delC
chr16:g.58521258delAAGGTAA
chr15:g.66326366T>C
chr5:g.57262675A>G
chr22:g.41529300A>G
chr19:g.57841221_57841222insCA
chr2:g.130764163A>T
chr11:g.118898501G>A
chr8:g.140549252G>C
chr15:g.78163723_78163724insTCTCATTAAATTTAATATCTTTAC
chr17:g.18316152C>G
chr9:g.108896956G>A
chr5:g.55322378T>C
chr7:g.38391938G>A
chr1:g.53249457_53249458insAGAAGAAAAATGG
chr10:g.11967406G>T
chr17:g.10406208C>T
chr19:g.8129257G>C
chr7:g.13895854C>G
chr19:g.18386384C>A
chr7:g.152179946T>C
chr17:g.59839686_59839687insC
chr7:g.48594715G>A
chr8:g.144851085A>T
chr2:g.25282357G>A
chr4:g.8007965C>A
chr2:g.219297917C>A
chr16:g.2445576delT
chr22:g.20626103A>G
chr13:g.48510659T>A
chr10:g.5747114A>C
chr19:g.32585839C>A
chr17:g.75914293C>T
chr16:g.56839587_56839588insTAGAAAAC
chr4:g.169001914delA
chr16:g.2111785A>T
chr2:g.55175890A>T
chr2:g.18576324A>G
chr15:g.74629842G>A
chr10:g.73760268C>T
chr22:g.29290428C>A
chr12:g.9168873A>G
chr10:g.97589948A>T
chr20:g.46978549G>C
chr9:g.38395756G>T
chr1:g.34785011C>T
chr19:g.58480843C>T
chr6:g.22569636G>T
chr19:g.51454266delC
chr14:g.105707456C>G
chr10:g.69207891C>A
chr9:g.133657109C>G
chr2:g.64636503A>G
chr7:g.44152397C>G
chr12:g.21048892C>T
chr12:g.68742579_68742580insGGTCAAGTCCCTGGTC
chr15:g.84862710T>C
chr1:g.165445016C>T
chr16:g.762721G>T
chr17:g.47680663_47680664insGTGCT
chr15:g.69446048_69446049insTCATGATTCT
chr20:g.50579889G>T
chr2:g.240982825C>G
chr1:g.248856557delCCAAATCTG
chr3:g.52554802delG
chr1:g.62555941C>T
chr19:g.16153062C>G
chr1:g.202428879G>T
chr2:g.32415648C>A
chr3:g.10142061_10142062insCCCAGGTCATCTTCTGCAATCG
chr10:g.5393792T>C
chr7:g.39207476A>T
chr7:g.103119973delAGG
chr11:g.68587945A>G
chr15:g.72555284T>G
chr13:g.102643298_102643299insATCAACAAAATATTAATAAAG
chr12:g.62592916C>T
chr20:g.35704689A>G
chr19:g.54252929C>A
chr22:g.24076188G>A
chr4:g.15816594A>G
chr9:g.85592575C>T
chr13:g.19993251T>A
chr17:g.17866318G>T
chr4:g.78597402C>A
chr16:g.16371457A>G
chr12:g.88192755_88192756insCTC
chr17:g.30519946A>G
chr11:g.12293867C>T
chr18:g.46433338G>A
chr7:g.94400194A>T
chr2:g.60775103delCTGTCAAA
chr2:g.64567697_64567698insAAGAGAA
chr9:g.68781136T>C
chr5:g.178149773C>G
chr7:g.11036997G>C
chr19:g.52951476delT
chr11:g.134382727C>T
chr13:g.38688365G>T
chr22:g.17864804A>C
chr13:g.94619506delGTT
chr7:g.87196615A>G
chr8:g.116771553C>A
chr16:g.3483548T>C
chr19:g.10358019G>A
chr6:g.16327984C>T
chrX:g.18330587C>G
chr2:g.101006072G>C
chr11:g.16817291C>T
chr20:g.33370596A>T
chr1:g.147208894T>C
chr16:g.47699533A>G
chr8:g.132911398delGTTTCCATTCCTGTC
chrX:g.18952526T>A
chr3:g.183124063A>T
chr1:g.183261224G>T
chr9:g.108912328C>A
chr4:g.4188932G>C
chr2:g.137275930C>A
chrX:g.50813989G>A
chr6:g.145952362A>T
chr11:g.5516509T>C
chr8:g.47396553T>C
chr17:g.7446928G>T
chr11:g.124673683C>T
chr1:g.206770973G>A
chr9:g.109087310C>A
chr4:g.38697240A>G
chr17:g.18427331C>A
chr8:g.142344241G>T
chr2:g.6883466C>T
chr13:g.79543653_79543654insTTATAGACTATAG
chr11:g.64600825G>T
chr15:g.64981026C>G
chr5:g.143147254A>T
chr4:g.140926061G>T
chr20:g.63873734delA
chr13:g.85795689C>A
chr19:g.54364853G>A
chr9:g.127724389G>T
chr17:g.46694515C>G
chr12:g.62396378G>C
chr2:g.201822816C>T
chr4:g.2731792C>T
chr2:g.68819135delT
chr1:g.81990502A>C
chr13:g.113811746G>A
chr19:g.12771170C>T
chr9:g.122855376T>G
chr5:g.96767940C>T
chr8:g.133238855G>T
chr15:g.87880400C>T
chr4:g.188003685A>G
chr1:g.21852159C>T
chrX:g.102658077C>T
chr3:g.170361141_170361142insA
chr19:g.2418069C>T
chr1:g.177281412C>T
chr11:g.64244650delTGGCACCAGGC
chr18:g.65809934C>T
chr10:g.62813850delG
chr17:g.72122927T>C
chr5:g.10988190delTG
chrX:g.77696681T>A
chr17:g.4969932_4969933insGGATGGC
chr8:g.60845305C>T
chr17:g.7499070T>G
chr12:g.8605421C>T
chr3:g.52644729delTT
chr5:g.84106686C>A
chr7:g.137912899C>T
chr17:g.58415526T>C
chr21:g.36072851T>G
chr11:g.44078029_44078030insCC
chr2:g.84552986G>C
chr4:g.47623915A>C
chr18:g.74634225A>C
chr1:g.66826855C>T
chr2:g.215333361delG
chr17:g.76022200G>A
chr19:g.56815961T>C
chr15:g.57544517C>G
chr5:g.1294608G>A
chr20:g.47649023C>G
chr7:g.157540578A>C
chr17:g.45096196A>C
chr12:g.913992_913993insAATTTTTGAGGAAGGA
chr10:g.92024900C>T
chr12:g.116576185delG
chr15:g.64675592C>A
chr1:g.108934711C>T
chr11:g.72000386C>T
chr2:g.24068461T>G
chr2:g.15945947G>A
chr1:g.159951613G>A
chrX:g.154398662C>A
chr13:g.28713183G>A
chr2:g.68775157C>T
chr19:g.12792680C>T
chrX:g.151672497G>C
chr1:g.236236192G>C
chr1:g.9105619G>C
chr11:g.59514984C>T
chr11:g.70492431_70492432insGCTTGGA
chr10:g.116960156C>T
chr6:g.24714414C>T
chr4:g.75046297G>T
chr12:g.110377461A>T
chr7:g.122079600T>G
chr2:g.200642716G>A
chr12:g.110881192G>A
chr17:g.45255650_45255651insACAGAGCTAAT
chr1:g.54623410G>T
chr21:g.44375845G>A
chr13:g.30952766G>T
chr19:g.52034951G>T
chr15:g.40007057delT
chr11:g.16817064G>A
chr2:g.54655971G>T
chr11:g.72013380C>T
chr5:g.83538436T>C
chr5:g.140705785C>A
chr2:g.21006144delC
chr6:g.133523139C>T
chr1:g.35748485delT
chr13:g.38864392A>G
chr4:g.173332306delAA
chr9:g.124021281G>T
chr5:g.71502701delAGCTG
chr2:g.215015545T>C
chr3:g.10142175C>T
chr21:g.14206820C>T
chr10:g.46888344C>A
chr7:g.152110631G>C
chr15:g.34103885T>C
chr17:g.8827222G>T
chrX:g.91436475delCCAGGGGTGCCTATCT
chr5:g.138253040_138253041insCAGATCCTT
chr16:g.55810962C>A
chr3:g.10149824delGAGC
chr5:g.14462916_14462917insTT
chrX:g.40688521G>T
chr1:g.162411917C>T
chr3:g.130675228delC
chr2:g.1643472C>G
chr17:g.19703103delA
chr11:g.62516888A>T
chr19:g.54668190T>A
chr5:g.138168020A>T
chr19:g.6750032T>C
chrX:g.53086146A>G
chr19:g.16509832delC
chr22:g.24183642G>T
chr9:g.77429007T>G
chr9:g.124971682G>A
chr6:g.33272693G>A
chr6:g.33320106T>A
chr7:g.98171666delC
chr21:g.46430173G>A
chr20:g.63643754G>T
chr22:g.41436762delC
chrX:g.78104266C>T
chr2:g.165754660A>T
chr20:g.64098300C>T
chr11:g.49953165C>T
chr7:g.101039109C>A
chr3:g.130627356G>A
chr6:g.20144270G>A
chr5:g.33561122delTC
chr11:g.118899117C>A
chr12:g.56269198delG
chr17:g.10501637_10501638insTTCTAATAGGAAAGA
chr12:g.3829994A>T
chr19:g.48014303G>T
chr8:g.38105738G>C
chr1:g.185143391delT
chr6:g.151349324C>A
chrX:g.3317692G>A
chrX:g.23785697G>A
chr5:g.140856961G>A
chr11:g.2165687G>C
chr9:g.15723687G>A
chr20:g.63977036A>C
chr13:g.95577961G>C
chr2:g.1436345C>A
chr2:g.31868389T>A
chr17:g.51649180A>G
chr6:g.43512814C>A
chr15:g.39590623G>T
chr14:g.68890249T>G
chr17:g.28642003T>C
chr8:g.91970697G>A
chr17:g.41871781C>T
chr15:g.58913586delTA
chr4:g.84690502delTTACCTGTTTGAGGGTGACGGTCTT
chr3:g.47019752delAACCTTACCTCTTTTC
chr18:g.42004503C>A
chr19:g.54217240C>A
chr1:g.156913221A>G
chr3:g.184170592G>C
chr1:g.227924274C>A
chr5:g.67164622G>A
chr1:g.117623705G>T
chr1:g.162381937G>T
chr1:g.113887395_113887396insT
chr7:g.86839562T>C
chr1:g.28987734C>G
chr7:g.37867835C>T
chr6:g.132645889C>T
chr6:g.153282701delA
chr22:g.19122175_19122176insG
chr7:g.152182219C>G
chr14:g.106470319A>T
chr21:g.42903421T>A
chr14:g.24376093T>G
chr20:g.5922743_5922744insATGGCG
chr19:g.50667937C>T
chr17:g.4538944T>G
chr9:g.128916311C>T
chr17:g.37541952C>T
chrX:g.149496423delT
chrX:g.21648912G>T
chr15:g.34943235_34943236insA
chr5:g.140803180C>A
chr7:g.87422222_87422223insTTCTTACAGTG
chr7:g.140456650A>G
chr1:g.119894130T>A
chr3:g.4303415G>A
chr14:g.35595686delAATATTACCTCT
chr17:g.63482621C>T
chr16:g.81678523T>C
chr6:g.36217939A>G
chr5:g.177135157T>C
chr17:g.66879030G>A
chr4:g.55858420_55858421insTTTAATATATGAATACACCTAT
chr9:g.124356670A>C
chr1:g.201322028C>T
chr17:g.10463388C>G
chr8:g.38418249C>G
chr5:g.141352497A>C
chr3:g.42692828C>T
chr9:g.124535948T>C
chr2:g.232483126A>G
chr11:g.6211346A>G
chr1:g.15101543C>T
chr7:g.93291703C>A
chr17:g.44178316G>T
chr12:g.49003200T>G
chr6:g.146803165T>C
chr5:g.80558851A>T
chr6:g.31627846T>C
chr2:g.24083002G>A
chr3:g.169115900C>A
chr4:g.76163353G>A
chr17:g.43045778G>A
chr17:g.43002759A>G
chr9:g.76310843G>A
chr6:g.31117102C>G
chr10:g.18675373G>A
chr17:g.47300508G>C
chr10:g.104164248_104164249insA
chr5:g.65611803C>G
chr2:g.231109031delTTTTTCCCAATTGTGGATG
chr3:g.146196775G>C
chr16:g.32066089G>T
chr11:g.101128195delC
chr5:g.87331417delTTATC
chr12:g.53279781G>T
chr6:g.75879894T>C
chr11:g.123059568C>G
chr5:g.42718942A>C
chr12:g.92819444A>T
chr17:g.34627030G>A
chr7:g.128324611C>T
chr19:g.56814719A>C
chr20:g.63213933A>G
chr16:g.426674G>T
chr2:g.208142753G>C
chr6:g.30580518A>G
chr14:g.58096981T>C
chr1:g.77933451T>C
chrX:g.150471387A>T
chr10:g.102358666G>T
chr14:g.71011598T>C
chr19:g.38870867C>T
chr17:g.29569062G>A
chr2:g.110161641C>T
chr3:g.122414686A>T
chr6:g.32047766C>T
chrX:g.119871910A>C
chr13:g.52156322_52156323insTTTGAAAGT
chr19:g.4048235C>A
chr4:g.2824726G>A
chr2:g.178535508G>A
chr12:g.20737159A>T
chr4:g.88463869T>G
chr16:g.50668061A>G
chr1:g.103718014A>T
chr5:g.139372080delA
chrX:g.120370802G>A
chr18:g.26861248T>C
chr19:g.40236095C>G
chr2:g.1840765delG
chr3:g.39094824C>G
chrX:g.23938686_23938687insTAAATGCAAAGCAAGTTC
chr8:g.123042196C>G
chr7:g.74777337A>G
chr5:g.134969963delA
chr3:g.99795305T>G
chr1:g.32212540C>G
chr20:g.3918713A>C
chrX:g.54551041G>C
chrX:g.14730286_14730287insTTAAAATTCTTT
chr2:g.169290993_169290994insGAAAATA
chr15:g.90253283G>A
chr1:g.152215872T>C
chr10:g.6012658G>T
chr5:g.150553292T>C
chr1:g.31577282G>A
chr9:g.21201944A>T
chr7:g.122010895A>G
chr3:g.64022318T>G
chrX:g.53193560delGGGGGCCC
chr17:g.16939481C>T
chr5:g.73123508G>C
chr14:g.21043231_21043232insCGCCACCTGG
chr7:g.65964403delTGGTACT
chr17:g.82807654G>A
chr14:g.105625931G>T
chr10:g.133556137A>G
chr11:g.124038925A>T
chr16:g.23690849A>T
chr19:g.58499634G>A
chr1:g.110603544G>C
chr7:g.130204037C>A
chr19:g.45884946C>A
chr6:g.69361164C>A
chrX:g.105767262T>G
chr2:g.169905203_169905204insAAAAGCTTAACCAATAATACAGAATAT
chr12:g.61710178A>T
chr2:g.178740024C>G
chr2:g.159956592A>G
chr21:g.30491572delAA
chrX:g.56737249delT
chr9:g.136474552delTTT
chr6:g.56470139delT
chr1:g.87339535G>C
chr12:g.6814157A>T
chr16:g.21972071C>A
chr17:g.2703452A>T
chr5:g.157805990G>T
chr16:g.67825987G>A
chr12:g.57810453C>T
chr8:g.80500079G>A
chr11:g.44074619G>A
chr3:g.172754658A>C
chr6:g.33280913G>A
chr11:g.57606486C>G
chr1:g.203348166C>G
chr18:g.21651442C>T
chr3:g.195295884T>G
chr7:g.151484783A>T
chr17:g.43504777G>A
chr6:g.43308398T>C
chr14:g.39313425G>A
chr17:g.35922620C>T
chr10:g.1183364delG
chr11:g.2132893delA
chr6:g.27147276G>A
chr11:g.46895196G>A
chr18:g.50819611T>C
chr6:g.31880730C>T
chr6:g.111008129_111008130insAAACTG
chr19:g.10321052delG
chr3:g.47977924G>A
chr16:g.58280686G>A
chr13:g.28427881A>G
chr3:g.122415317T>C
chr18:g.79433724C>A
chr5:g.136225348G>C
chr6:g.43269711C>T
chr6:g.117268347T>C
chr8:g.37698539C>A
chr14:g.19747534T>C
chr12:g.109983687T>A
chr1:g.16421944G>A
chr17:g.35847079_35847080insCATTA
chr4:g.169002106G>A
chr12:g.101780034C>A
chr7:g.87566224T>C
chr8:g.18871726delA
chr6:g.156935561_156935562insC
chr15:g.20439333G>A
chr13:g.32239856T>C
chr3:g.196660276C>A
chr1:g.12893331A>G
chr10:g.92637294G>C
chr12:g.56269505T>C
chr5:g.33461975T>A
chr6:g.154091414G>A
chr2:g.24212652delT
chr15:g.98969473C>T
chr6:g.47009297A>T
chr4:g.158253545G>A
chr2:g.202899579_202899580insAAACAGAAAG
chr15:g.75639564G>C
chr9:g.5920152_5920153insAGTCTCCAGC
chr13:g.52461663A>T
chr1:g.154983765T>A
chr19:g.6182792C>T
chr15:g.40902711G>T
chr14:g.95203535A>G
chr2:g.191276967A>G
chr1:g.15929722T>C
chr1:g.175365144A>T
chr22:g.50704996_50704997insA
chr7:g.128852846A>G
chr19:g.17058634T>G
chr16:g.84070031delT
chr2:g.45392968G>T
chr7:g.86765395T>A
chr3:g.10146621_10146622insAT
chr3:g.186790384T>C
chr10:g.17902116C>G
chr1:g.101240216C>T
chr14:g.93294659C>A
chr11:g.20464503C>T
chrX:g.124045304T>G
chr15:g.39776477T>A
chr16:g.49523698C>A
chr2:g.200507010C>G
chr9:g.127714000A>G
chr1:g.155482254C>A
chr12:g.122190238A>T
chr5:g.176529229C>A
chr13:g.109785536C>G
chr12:g.115991458C>A
chr7:g.106869208C>A
chr17:g.28276768G>A
chr15:g.73298596T>C
chr17:g.7819269T>A
chrX:g.24748434G>C
chr1:g.160130282C>T
chr7:g.139237028C>G
chr10:g.7749360A>G
chr7:g.128029958T>C
chr7:g.92235695delG
chr7:g.48219454G>C
chr22:g.42060223G>A
chr19:g.39391379A>G
chr10:g.88831899C>A
chr22:g.23780661G>T
chr19:g.15187276C>A
chr1:g.24929697C>G
chr12:g.117330855A>G
chr9:g.112687594C>G
chr5:g.108367905C>G
chr2:g.230817759C>T
chr12:g.70661138delAGAACTA
chr3:g.114139545T>A
chr13:g.102875800A>G
chr3:g.3129121A>T
chr12:g.54282464T>G
chr5:g.69545084C>G
chr12:g.110282622G>C
chr14:g.104942739C>T
chr4:g.78387398A>T
chr17:g.75273385G>C
chr5:g.32052679C>T
chr4:g.148154681A>C
chr2:g.199925521delA
chr14:g.59473010_59473011insATAAA
chrX:g.85255336G>A
chr1:g.100038240A>T
chr3:g.150682292_150682293insTTAAAAGAGTTA
chr20:g.52160332delC
chr8:g.100920596T>C
chr9:g.14748601G>T
chr10:g.127738533C>T
chr1:g.11949869G>C
chr12:g.118401804delT
chr1:g.155660891T>A
chr17:g.50699815G>A
chr19:g.6853039C>T
chr19:g.804177C>A
chr9:g.135663400A>C
chr7:g.123692618G>T
chr12:g.71676947_71676948insAGATGG
chr3:g.47083770delC
chr16:g.31190788T>G
chr6:g.149889544G>A
chr1:g.156800467G>A
chr1:g.31672504T>A
chr2:g.23798214A>G
chr17:g.50473985_50473986insGAAAAATATCAGACATC
chr17:g.67959588G>A
chr4:g.106244727_106244728insCTTGGGAATTTAAA
chr11:g.7071240_7071241insTTTCTCTGTAAAGG
chr2:g.241606448C>A
chr12:g.2601925G>T
chr15:g.90491494A>C
chrX:g.48214579T>G
chr17:g.5335337_5335338insAACCTG
chr16:g.66932257C>T
chr14:g.49669539G>A
chr1:g.156174942T>C
chr19:g.5941662T>C
chr3:g.9893151T>A
chr11:g.64246454A>G
chr19:g.6309745T>A
chr3:g.38229734_38229735insATAAAAACTC
chr4:g.148435583T>G
chr20:g.17436765G>T
chr11:g.44275472C>T
chr17:g.28122714T>C
chr18:g.63397067A>G
chr19:g.18910986G>A
chr21:g.32745588A>C
chr17:g.39108302G>T
chr12:g.57488179T>A
chr4:g.89953054C>T
chr21:g.43007511A>G
chr10:g.90749124G>T
chr22:g.17181995T>A
chrX:g.71245386T>C
chr11:g.68021761C>G
chr1:g.1956625T>G
chr11:g.124694285delTTTCTCCTTTCGATGAAGGACTC
chr10:g.28681996_28681997insT
chr2:g.86605039A>G
chr8:g.103918568_103918569insCAACTCA
chr2:g.169018059C>A
chr16:g.46618207delA
chr17:g.75568997C>T
chr17:g.28328720delATTCA
chr7:g.43509040G>T
chr2:g.200575327G>C
chr12:g.4662611delGATA
chr16:g.12042974G>T
chr1:g.214483233C>A
chr14:g.104994801T>A
chr1:g.111192305C>T
chr19:g.40588695G>A
chrX:g.48605025A>T
chr12:g.24901852C>T
chr6:g.32848790C>A
chr6:g.31962756G>A
chr15:g.74272865C>G
chr12:g.81277350T>C
chr3:g.39184498A>T
chrX:g.47563055C>A
chr12:g.121961997delGG
chr16:g.11736119C>A
chr11:g.111753526delTT
chr17:g.20365702G>A
chr2:g.43839089G>A
chr13:g.113799407C>A
chr6:g.36914332C>A
chr1:g.184794951_184794952insA
chr2:g.68134682G>C
chrX:g.91879176C>T
chr14:g.88687232C>T
chr5:g.140850493G>A
chrX:g.3033308T>A
chr16:g.48210984G>A
chr11:g.118613890G>T
chr3:g.33439843G>T
chr3:g.88055672C>G
chr12:g.120766366A>G
chr4:g.55411762T>C
chr18:g.34815908_34815909insA
chr3:g.52644767_52644768insT
chr14:g.24118524G>C
chr20:g.63543341G>T
chr4:g.20598344G>A
chr22:g.41217159A>G
chrX:g.53211600delT
chr5:g.160253460G>C
chr22:g.29439331G>T
chr5:g.141303254T>G
chrX:g.72872539C>T
chr8:g.28348769A>G
chr1:g.244686594C>A
chr17:g.28326688C>T
chr3:g.152300278C>T
chr6:g.88144730C>T
chr10:g.97880253G>A
chr2:g.151631346_151631347insGTGGTCTTGATGAAGAGTTTTTGACTTTTTTCCTCTG
chr5:g.34757549G>C
chr19:g.35538348A>G
chr1:g.43960290G>A
chr18:g.13666571_13666572insAAGAAG
chr2:g.178570682C>T
chr1:g.224317887C>T
chr19:g.36013403C>T
chr1:g.25227512G>A
chr6:g.56535128T>C
chr10:g.32845602A>C
chr12:g.21765849G>T
chrX:g.55486805T>A
chr11:g.63014739delG
chr4:g.70644522C>A
chr17:g.50278910T>A
chr6:g.43525920A>G
chr3:g.181713163G>C
chr1:g.183574573T>G
chr20:g.39025295_39025296insACTGTA
chr16:g.1828208G>C
chr17:g.82082560A>T
chr13:g.95177749A>C
chr15:g.38484599delTGGAGGAGGTGGTGGTGGTGGTGGTGGTGGTGG
chr4:g.95114818G>T
chr15:g.40213454G>A
chr1:g.227430517G>T
chr16:g.3727575G>A
chr17:g.78358649C>T
chr2:g.128120446G>A
chr1:g.185139503A>C
chr11:g.4653391delCT
chr1:g.16132091G>A
chr2:g.144396591C>T
chr21:g.37013614G>C
chr7:g.47885689A>G
chr6:g.82216086G>A
chr19:g.58554145T>C
chr12:g.21508028G>A
chr4:g.163129206A>G
chr1:g.94487744T>C
chr7:g.39433230C>T
chr11:g.1017647G>T
chr2:g.75666052A>G
chr7:g.77311932_77311933insGTAGACCC
chr1:g.19179197T>C
chr21:g.46122505G>C
chr4:g.163613489C>T
chr4:g.48036077G>A
chr3:g.167328084A>G
chr7:g.23200398T>A
chr1:g.16050571_16050572insA
chr5:g.76833358T>A
chr7:g.44517248T>A
chr14:g.105624566C>T
chr12:g.49046676T>A
chr14:g.21155689G>A
chr15:g.40183883G>C
chr5:g.32059251G>T
chr12:g.92740894T>C
chr11:g.32934920_32934921insAACTCTT
chr16:g.15104542T>A
chr19:g.5214582C>T
chr6:g.30916917T>C
chr17:g.41523681T>C
chr6:g.33440771G>A
chr4:g.20528371C>T
chr12:g.111347996T>G
chr6:g.126348464A>G
chr15:g.62771074T>C
chr11:g.72704262_72704263insC
chr12:g.1834524C>T
chr1:g.151307732G>C
chrX:g.19355365_19355366insT
chr3:g.155937723G>T
chr9:g.19089477A>G
chr3:g.180604559G>T
chr6:g.131674248A>G
chr19:g.51458365delA
chr18:g.12701063T>C
chr3:g.186581381A>C
chr4:g.47848273C>T
chr8:g.140555970T>C
chr11:g.16826405T>G
chr12:g.22671312C>A
chr2:g.178574508G>T
chr1:g.203496119C>T
chr8:g.21987225T>G
chr7:g.139573150delC
chr20:g.50128114_50128115insACCACAGG
chr17:g.27759071T>C
chr22:g.36285198C>T
chr19:g.54599332C>T
chr4:g.75805251A>G
chr3:g.52586346T>C
chr8:g.52630526C>A
chr16:g.346291C>T
chr5:g.67152733C>G
chr6:g.170283923G>A
chr17:g.76292884C>T
chr11:g.118908655C>T
chr16:g.77741592T>G
chr19:g.54839611C>T
chr5:g.140830282G>A
chr12:g.52451716G>T
chr10:g.126135626T>A
chr1:g.154601716T>A
chr1:g.67329701G>T
chr1:g.52237581G>C
chr12:g.113927071_113927072insT
chr11:g.76660523C>T
chr1:g.11124516G>T
chr17:g.48051301C>A
chr16:g.4875033A>G
chr1:g.186055623delGCTGTGAATGTA
chr5:g.39285132T>G
chr5:g.94651841A>C
chr12:g.23665513G>A
chr12:g.53059109delC
chr10:g.21516207_21516208insTACTACA
chr17:g.7674894G>A
chr6:g.35503627G>A
chr6:g.52404038T>A
chr19:g.49871679G>A
chr16:g.70560533G>A
chr7:g.106869174C>T
chr17:g.55320724G>A
chr7:g.71712168G>A
chr7:g.101613549G>A
chr4:g.128091498T>C
chr16:g.56476228_56476229insGAC
chr5:g.151473674G>C
chrX:g.54294636T>C
chr7:g.132210954G>T
chr1:g.23875334T>A
chr11:g.108325528C>T
chr15:g.76949188T>G
chr4:g.2663145_2663146insA
chr4:g.87108247G>T
chr17:g.35174312G>C
chr10:g.87552326_87552327insTGTACGC
chr5:g.141214558G>C
chr3:g.33072682T>C
chr4:g.69214852_69214853insAATATGAAGTAATCGAACTTTGTTTGTCTC
chr10:g.96157835A>G
chr5:g.483404G>A
chr9:g.35749860T>C
chr21:g.42396115G>A
chr2:g.60553259G>A
chr1:g.26772507delAGGA
chr3:g.129304625C>T
chr9:g.98201542C>T
chr2:g.97202199C>T
chr17:g.42309521C>G
chr1:g.156727297delAG
chr13:g.24845045_24845046insAACAATACAAAAT
chr11:g.1094157G>A
chr6:g.42964273C>T
chr3:g.52678598C>A
chr20:g.62133393G>A
chr19:g.57131378T>C
chr12:g.133058417_133058418insA
chr19:g.51457939A>C
chr5:g.163491243A>T
chr9:g.137452415T>G
chr5:g.154804294A>T
chr7:g.47815339C>A
chr20:g.57563094delG
chr17:g.30271313T>C
chr7:g.100160739delGGCA
chr6:g.30917140G>C
chr14:g.55637287G>A
chr11:g.60946698G>T
chr1:g.151852275C>A
chr1:g.171282102A>G
chr9:g.112997404T>G
chr4:g.68663051C>T
chr19:g.58294336C>G
chr4:g.128082241C>A
chr2:g.178572635T>A
chr5:g.157162905G>A
chr20:g.44905131G>A
chr5:g.170067622T>A
chr12:g.101786190T>C
chr17:g.3660598G>A
chr11:g.72589753G>A
chrX:g.107904017C>A
chr7:g.128030601A>G
chr3:g.138945579A>T
chr11:g.5967765_5967766insTTGTTT
chr1:g.32681985_32681986insGGATCAC
chr2:g.209993408C>A
chr2:g.235042752G>T
chr2:g.85371543G>T
chr11:g.56612563C>A
chr11:g.105029709delAAACTT
chr13:g.77898328A>C
chr13:g.52665637G>A
chr6:g.26413219G>A
chr5:g.138925384A>C
chr1:g.67380069delCTGACAGCTG
chr3:g.57597256delG
chr16:g.31062197C>T
chr9:g.97524300G>A
chr4:g.81204969G>A
chr17:g.52072363C>T
chr6:g.39871517T>C
chr16:g.51137412T>C
chr3:g.52563324delG
chr11:g.61958151G>A
chr1:g.112582089A>T
chr3:g.132704274T>C
chr2:g.201163060delATCTTACTAG
chr19:g.39244494C>T
chr12:g.120153222delG
chr17:g.4978524A>G
chr17:g.30734633G>T
chr17:g.9728500T>C
chr16:g.46599915C>T
chr9:g.137245513G>A
chr11:g.46858871G>A
chr1:g.114594512G>A
chr1:g.231163967C>A
chr12:g.58890745C>G
chr7:g.149847823C>A
chrX:g.100862462A>C
chr4:g.85930786A>T
chr16:g.31484891A>G
chr20:g.45607942G>A
chr2:g.203180493delGT
chr11:g.72693230C>T
chr3:g.193290039G>T
chr16:g.4358460C>T
chr19:g.57702372C>G
chr4:g.103079729G>T
chrX:g.101126795G>A
chr2:g.44209230T>C
chr5:g.42806932delAA
chr11:g.60069626_60069627insAAATTAAAGA
chr11:g.64797144G>T
chr15:g.90935554T>A
chr11:g.108147492delT
chr11:g.19237950G>A
chr2:g.53728827T>G
chr20:g.13769991A>G
chr2:g.44322836T>C
chr1:g.17274760_17274761insGAAACC
chr19:g.55976190_55976191insA
chr16:g.1457315C>A
chr5:g.156647467C>T
chr9:g.27213542A>C
chr2:g.86098664G>A
chr22:g.50516445A>C
chr22:g.30870582A>G
chr2:g.162045556A>C
chr11:g.73409661C>A
chr15:g.81147916G>A
chr21:g.38299570T>G
chr11:g.121566991C>A
chr1:g.17409066G>A
chr11:g.134252908C>G
chr10:g.100288472G>A
chr1:g.11858711G>A
chr17:g.40925312G>C
chr2:g.120984555G>T
chr4:g.128028639C>T
chr3:g.127022142C>T
chr17:g.16939480C>A
chr7:g.101043593T>G
chr12:g.1639707C>T
chr4:g.99611153C>T
chr3:g.33602484A>T
chr1:g.35434795delC
chr3:g.133584083T>C
chr9:g.127444058G>A
chr19:g.44522844C>T
chr2:g.3643965C>T
chr9:g.32457092T>C
chr5:g.157214297C>T
chr15:g.34532934G>A
chr7:g.6691720G>C
chr15:g.101286978delT
chr2:g.85550970delGGTC
chr4:g.87185545A>G
chr16:g.25178164C>T
chr17:g.82664543C>A
chr8:g.76863833T>C
chr1:g.5874894C>A
chr4:g.13604474_13604475insGATTCT
chr1:g.111981868C>T
chr18:g.58537036A>G
chr3:g.134608492delCACT
chr2:g.203402666C>A
chr17:g.3883445C>A
chr12:g.15108958A>C
chr10:g.68747566delG
chr3:g.186787844T>G
chr12:g.65218569A>C
chr9:g.66989955_66989956insCC
chr9:g.115021146G>A
chr7:g.134960490T>C
chr7:g.127373667C>G
chr3:g.155829734C>A
chr6:g.63712768A>G
chr12:g.6330656G>T
chr15:g.30626853G>T
chr3:g.112638964G>C
chr4:g.157143934C>T
chr19:g.40623651delG
chr19:g.42729929G>C
chr5:g.155014002C>T
chr22:g.20307942A>T
chr9:g.5463001G>A
chr11:g.6402677G>A
chr7:g.83368023T>A
chr21:g.21292107G>C
chr3:g.14116430C>T
chr1:g.185298028A>G
chr17:g.7343422G>A
chr16:g.20859889A>G
chr3:g.132538331A>T
chr7:g.29884276C>T
chr9:g.93516004delG
chr2:g.86105735G>T
chr11:g.61857513G>A
chr15:g.82540446A>G
chr16:g.68339564G>A
chr21:g.31120498C>T
chr14:g.32149999A>G
chr17:g.82198414T>C
chr6:g.51753224T>C
chr10:g.92645485C>T
chr22:g.37570310T>C
chr17:g.4895369C>A
chr7:g.92062450_92062451insT
chr20:g.18813762G>A
chrX:g.1348447A>G
chr4:g.75977693delC
chr12:g.112134746A>G
chr7:g.158656560_158656561insAGAGTTGAGT
chr17:g.50551658C>T
chrX:g.139562132A>T
chr2:g.100995599T>C
chr7:g.5065428A>G
chr4:g.38798244G>T
chr10:g.86471023A>G
chr2:g.135168615C>A
chr5:g.116014450G>A
chr14:g.55350921T>G
chr5:g.160422799G>A
chr18:g.21028900T>C
chr19:g.22757637C>G
chr12:g.56093539G>A
chr17:g.80065512G>T
chr1:g.233135118C>G
chr17:g.59214822delACCATGTCCGGT
chr2:g.8798295_8798296insAATATTGTATCTTACATGAAGTGATTGTGTTTTT
chr11:g.20083004C>G
chr3:g.52409584T>G
chr2:g.25806332G>A
chr17:g.40352068A>G
chr12:g.122859443C>T
chr9:g.33473896C>T
chr12:g.113128134T>A
chr3:g.150410063C>T
chr16:g.30739024C>G
chr16:g.57997262C>T
chr15:g.44573680C>T
chr3:g.99849852A>G
chr14:g.58465872C>G
chr15:g.90477778C>A
chr10:g.110600479G>C
chr17:g.44559134C>T
chr5:g.141423136G>C
chr7:g.103368000C>T
chr14:g.23425280A>T
chr15:g.71037272_71037273insCATATACTTTTTTG
chr7:g.94421902A>G
chr1:g.39665623G>A
chr20:g.49247550delAGGCCAG
chr11:g.66335094G>A
chr11:g.6002102C>G
chr2:g.38995161C>T
chr11:g.6785052C>A
chr2:g.161235379C>T
chr15:g.43025391G>C
chr1:g.55043907C>T
chr2:g.134953841A>G
chr8:g.144083485G>C
chr17:g.80379629C>T
chr17:g.41611401delT
chr19:g.39425232A>G
chr2:g.198084683T>G
chr5:g.133088463G>T
chr15:g.62707221C>G
chr16:g.2499922G>A
chr1:g.31911773C>T
chr1:g.88770443A>T
chr7:g.43986652T>G
chr16:g.67626641C>A
chr19:g.9114848C>A
chr9:g.2823805C>G
chr17:g.38327490delTTCTTTCAGTCAC
chr1:g.228360418delT
chrX:g.135349302T>A
chr14:g.75651532T>G
chr1:g.117025582C>T
chr16:g.71679398T>G
chr3:g.27291504_27291505insAGTGGAGCT
chr8:g.102329092delTGTTA
chr17:g.40966607C>T
chr20:g.33757159G>C
chr17:g.3397819delC
chrX:g.9739567C>T
chr2:g.178741643C>A
chr3:g.179234302G>C
chr20:g.38318463C>A
chr22:g.38671233G>T
chr2:g.42682529C>G
chr12:g.4912536G>T
chr19:g.35849300T>C
chr16:g.14765313C>A
chr1:g.40757319C>G
chr9:g.137215939C>A
chr3:g.139371764delA
chrX:g.48686100A>T
chr13:g.99296025C>G
chr9:g.37500910C>T
chr9:g.77321529C>T
chr3:g.67008298G>C
chr20:g.34645303A>G
chr2:g.69103061G>T
chr12:g.99984222C>G
chr11:g.59601794delT
chr16:g.24804748C>T
chr9:g.137917248_137917249insC
chr11:g.106091381A>T
chr6:g.31154695C>T
chr17:g.18241567T>G
chr19:g.12702830T>A
chr1:g.247101790T>C
chr4:g.113357136C>A
chr10:g.122993719A>G
chr17:g.7674954G>A
chr11:g.119067920C>G
chr1:g.88805529A>G
chr12:g.23846063C>T
chr1:g.161606851G>T
chr20:g.62346080C>T
chr11:g.55994378G>C
chr20:g.47636676_47636677insCTCCTCCAG
chr6:g.130144722T>A
chr19:g.52366174G>A
chr5:g.179620902C>T
chr19:g.54122535A>C
chr22:g.20798643A>C
chr3:g.129481630C>T
chr4:g.13337336C>T
chr2:g.113742842C>A
chr2:g.98211951C>G
chr17:g.50626631C>A
chr2:g.227889878G>T
chr15:g.99729020T>C
chr17:g.43016116T>G
chr20:g.45416593A>G
chr1:g.211576019A>T
chr7:g.73303578A>T
chr7:g.127701247T>C
chr20:g.32428147C>G
chr12:g.66465342_66465343insCAGG
chr1:g.143971093A>C
chr11:g.108940269T>C
chr5:g.119166704T>G
chr7:g.77262135delTCAATT
chr12:g.50706652_50706653insT
chr5:g.170735826C>A
chr10:g.119898457G>C
chr17:g.39792677A>T
chr16:g.579095T>C
chr12:g.94248298A>C
chr5:g.128966556G>T
chr9:g.91355882C>T
chr5:g.141422318G>T
chr6:g.46692382C>T
chr9:g.35106397C>T
chr17:g.81672101C>T
chr5:g.42719277_42719278insTTGTTTCTTAAATAAGAAACTTTTTTATTTAAAAAACTAAAAA
chr19:g.11426717G>C
chr14:g.102027468C>A
chr5:g.16676145_16676146insAGACCAT
chr17:g.76274167T>C
chr3:g.52199295T>G
chr10:g.90919253G>A
chr7:g.99004348G>C
chr8:g.70138322T>C
chr2:g.147896411_147896412insGC
chr17:g.42613962C>T
chr17:g.29166010G>C
chr22:g.36227706C>T
chr11:g.47315314T>C
chr22:g.25041416G>A
chrX:g.49172095_49172096insG
chr17:g.62679850A>G
chr2:g.102450902delG
chr1:g.211479205C>T
chr12:g.9979446A>T
chr6:g.20490465_20490466insT
chr19:g.41709792C>A
chr7:g.43866765A>C
chr1:g.145996157T>C
chr1:g.161236517delG
chr15:g.75358293C>G
chr2:g.214767483C>T
chr10:g.69195219G>A
chr4:g.112650524_112650525insGCAGATTTAAATAATT
chr7:g.101216435C>A
chr12:g.10806450T>C
chr5:g.136225319_136225320insAGTCCCATGAC
chr8:g.130884640C>T
chr14:g.102922730C>T
chr3:g.16175167C>T
chr4:g.173295399A>G
chr17:g.44011885C>G
chr3:g.64594320C>T
chr1:g.206731691C>A
chr11:g.65526040C>T
chr20:g.42315787T>C
chr20:g.62327286C>G
chr1:g.148992459A>G
chr17:g.3278593G>A
chr1:g.235759072G>A
chr7:g.143052840G>A
chr1:g.171515733G>A
chr16:g.65004750C>T
chr4:g.41685756_41685757insGAT
chr22:g.21026263C>G
chr9:g.74827777C>T
chr1:g.110951858A>T
chr10:g.103379608G>C
chr16:g.19629812C>G
chr16:g.67827935G>A
chr16:g.81041241A>C
chr22:g.39514439_39514440insG
chr2:g.130763353C>T
chr4:g.155711174G>C
chr5:g.116467665C>G
chr13:g.32340884A>G
chr13:g.75566818G>A
chr12:g.57467361G>T
[truncated: 8,000 more rows]

## Sheet: LGG
chr2:g.208248388C>T
chr17:g.7673803G>A
chr2:g.208248389G>A
chr15:g.90088606C>T
chr17:g.7673802C>T
chr19:g.42287605C>T
chr17:g.7674872T>C
chr2:g.208248389G>C
chr2:g.208248389G>T
chr9:g.136518618delAGA
chr17:g.7674220C>T
chr17:g.7675088C>T
chr17:g.7673776G>A
chr17:g.7675076T>C
chr17:g.7674221G>A
chr1:g.145578886T>C
chr7:g.55165350G>T
chr10:g.75025188delACAA
chrX:g.77654139G>A
chr19:g.42287563C>T
chr19:g.42287566C>T
chr1:g.77968164delCAGT
chr7:g.55154129C>T
chr19:g.42287606G>A
chr17:g.7674230C>T
chr17:g.7674945G>A
chr19:g.42294907C>T
chr15:g.101759755C>G
chr17:g.31235639delTGTT
chr3:g.179234297A>G
chr3:g.179199690G>A
chr17:g.7673802C>A
chr17:g.7674894G>A
chr17:g.7674256T>C
chr5:g.68295269A>G
chr19:g.42294899G>A
chr7:g.55154017C>T
chr1:g.77962785delTA
chr3:g.179234284A>G
chrX:g.77682597delTCTC
chrX:g.77684181_77684182insT
chr15:g.101759775G>T
chr19:g.42289063delCAGT
chr3:g.179210291G>A
chr17:g.7673704G>A
chr15:g.90088606C>A
chr20:g.63920087G>A
chr10:g.79292249delGCAGCAGCGGCAGTGGCAGCA
chr14:g.65078029C>T
chr7:g.55142382T>G
chr15:g.86397372G>A
chr17:g.7675161G>A
chr22:g.30490232C>T
chr17:g.7673796C>A
chr17:g.4676438C>T
chr2:g.29064897G>A
chr9:g.81993450G>A
chr17:g.7675206G>C
chr7:g.55155911G>T
chr3:g.179199156A>G
chr11:g.113986041C>T
chrX:g.77683162_77683163insT
chr17:g.7676005_7676006insA
chr11:g.105898425A>G
chr15:g.90088607T>C
chr17:g.12752690G>A
chr17:g.7675140G>T
chr11:g.58710062G>A
chrX:g.91878713G>A
chr1:g.158845678C>T
chr19:g.42292730_42292731insC
chr17:g.7674252C>T
chrX:g.112671186G>A
chrX:g.77681985delTCTC
chr7:g.135394157T>C
chr9:g.134699994C>T
chr9:g.87921071G>A
chr17:g.41516933C>T
chr6:g.56497896_56497897insT
chr17:g.7674254T>C
chr17:g.7675085C>T
chr17:g.7673811A>G
chr12:g.130982021C>T
chr3:g.179218294G>A
chr17:g.53823521G>A
chr17:g.30210595C>T
chr1:g.247864730G>A
chr14:g.105625923G>A
chr17:g.7675095C>T
chr17:g.18150483G>A
chr19:g.42287569C>T
chrX:g.77682537delG
chr2:g.89040509G>A
chr17:g.7674953T>C
chr5:g.7520800C>T
chr17:g.7673781C>T
chrX:g.77684174delTCAA
chr4:g.69844177C>T
chr11:g.429619C>T
chr16:g.29485611C>G
chr2:g.30955730C>T
chr19:g.5727272G>A
chr14:g.24318729C>T
chr17:g.7675148G>T
chr1:g.198319616_198319617insAACTAACTG
chr17:g.7674227T>C
chr5:g.68293795delATATGATAGATT
chr19:g.42287676G>A
chrX:g.77682253delT
chr17:g.7676044A>C
chrX:g.77593726A>G
chr15:g.20439392G>A
chr14:g.96408921C>T
chr2:g.25750221delTTCTT
chrX:g.77664690_77664691insC
chr17:g.7675124T>C
chr6:g.75134783C>T
chr17:g.7675190C>T
chr17:g.31350209C>T
chr1:g.114713908T>C
chr4:g.55592161C>T
chr10:g.87961046_87961047insA
chr11:g.60181602G>A
chr17:g.8797861G>T
chr1:g.169729496G>A
chr2:g.219632296G>A
chrX:g.77664683_77664684insT
chr3:g.98149693C>T
chr1:g.119969538delAGA
chr5:g.218356A>G
chr17:g.7674214G>A
chr8:g.120226669C>T
chr12:g.112489068C>T
chr15:g.90088607T>A
chr11:g.4882535C>T
chrX:g.77684004G>A
chr19:g.42294688G>A
chr7:g.140753336A>T
chr10:g.87933120G>A
chr19:g.42291441delTG
chrX:g.77574295G>C
chr12:g.112450395C>A
chr4:g.41013593C>T
chr17:g.7674885C>T
chr15:g.57263168delAAAG
chr9:g.12702411delACAA
chr4:g.154366238C>T
chr19:g.42294899G>T
chrX:g.77558842G>A
chr7:g.82952761C>T
chr3:g.114339282T>C
chr1:g.32247588G>A
chr17:g.64503981delACAG
chr6:g.47878770C>T
chr17:g.7675174C>T
chr1:g.216651011C>T
chr10:g.45827364T>G
chr6:g.29745704G>T
chr9:g.136518762C>T
chr3:g.42713260C>T
chr13:g.77007680C>T
chr17:g.7675077G>C
chr17:g.7673806C>T
chr5:g.68293310G>A
chr17:g.41503421G>A
chr20:g.45207575C>T
chr10:g.101993558G>A
chr7:g.75148882T>C
chr14:g.23639815G>A
chr2:g.237372025C>T
chr1:g.248453212C>T
chr9:g.81584178C>T
chr22:g.41467522G>A
chr9:g.76328106C>T
chr17:g.7673821G>A
chr1:g.248626292C>T
chr17:g.7674890T>C
chr2:g.85591743C>T
chr1:g.158642440C>T
chr3:g.19533595C>T
chr17:g.7675216C>G
chr19:g.42287701C>T
chr17:g.7673787delG
chr17:g.41097785G>A
chr2:g.88087871G>A
chrX:g.118825455G>A
chr3:g.50367671G>A
chr7:g.55143387G>A
chr2:g.96133966G>A
chr4:g.143220491C>T
chr7:g.55154018G>C
chr11:g.1621776G>A
chr1:g.245698930G>A
chrX:g.77683296G>A
chr10:g.93313050G>A
chr17:g.8797859T>C
chr16:g.15745206C>T
chr17:g.40750538C>T
chr9:g.136517850C>A
chr11:g.1622049C>T
chr11:g.47234871C>T
chr17:g.8797860T>C
chrX:g.77620452G>A
chr11:g.6768358G>A
chr21:g.33811190G>A
chr1:g.59848488G>A
chr18:g.48758140G>A
chr17:g.18483944G>A
chr20:g.41173744G>A
chr3:g.141445104G>A
chr3:g.8548753C>T
chrX:g.130346644G>A
chr4:g.70481817G>A
chr9:g.136517831delGTT
chr17:g.10528893G>A
chr12:g.45730116delTACTT
chr14:g.35404607A>C
chr14:g.64772924G>A
chr4:g.139060547C>A
chrX:g.152255789G>T
chr19:g.19219243C>A
chr11:g.615146T>G
chr22:g.41527874G>A
chr19:g.54462894C>A
chr14:g.39315704G>A
chr2:g.189474270G>A
chrX:g.40074622delC
chr5:g.111105319T>G
chr10:g.96949243C>G
chr12:g.120661158G>T
chr7:g.71132865C>T
chr6:g.96891388T>C
chr1:g.236537505G>A
chr2:g.201011465G>A
chr5:g.140486999T>A
chrX:g.145828054_145828055insATGTGAAATAAAAGTGAAA
chr1:g.31585179T>C
chrX:g.70204470C>T
chr15:g.45097692G>A
chr10:g.27211043C>T
chr16:g.68371199G>A
chr9:g.66988256C>T
chrX:g.105923171C>T
chr22:g.37655653G>A
chr8:g.102214120G>C
chr3:g.33400195A>C
chr11:g.117229424G>A
chr5:g.140641972G>A
chr6:g.110102080T>C
chr11:g.119093332A>G
chr3:g.46996545T>C
chr13:g.77288359A>T
chr9:g.70387779C>G
chr1:g.11823750delTGAA
chr2:g.206144894G>T
chr7:g.73449685C>A
chr17:g.69027649C>T
chr3:g.47513562delTTAAGCAGGTTA
chr1:g.226064454G>A
chr1:g.183232783G>C
chr3:g.170360380A>C
chr12:g.7096967G>A
chr5:g.167952643C>G
chr19:g.49803032G>A
chr1:g.152511770G>A
chr9:g.76703382T>C
chr1:g.185990402T>C
chr2:g.73088894G>A
chr1:g.37878195T>C
chr11:g.76796214C>G
chr5:g.141174245C>T
chr12:g.56642688G>C
chr2:g.11638706delTT
chr16:g.89919784A>G
chr1:g.15056113_15056114insG
chrX:g.12819603C>T
chr4:g.69204569C>A
chr10:g.86726175G>A
chrX:g.20138595C>T
chrX:g.124384143C>T
chrX:g.123631837C>T
chr2:g.210154532A>G
chr6:g.49444717C>T
chr4:g.2747738C>T
chr7:g.108182695G>A
chr22:g.33650565G>A
chr15:g.74620197G>A
chr11:g.59504155G>T
chr6:g.1394729C>A
chr10:g.87864467G>A
chr4:g.103589761G>A
chr1:g.186333224delGAG
chr14:g.24164710_24164711insCA
chr21:g.29149193T>C
chr19:g.7542037C>T
chr15:g.61907331T>C
chr20:g.62554328G>A
chr17:g.7227123C>T
chr3:g.183193021G>T
chr1:g.153340530G>C
chr7:g.8127933C>A
chr15:g.25070497A>G
chr6:g.55331747T>C
chr17:g.43013862G>T
chr10:g.22550720T>G
chr6:g.28390820A>G
chr17:g.3873447C>T
chr21:g.30480088C>T
chr20:g.47639020C>G
chr15:g.84621281C>T
chr18:g.50274227G>A
chr9:g.2829902C>T
chr15:g.52109859G>A
chrX:g.77684349C>A
chr10:g.122454918_122454919insCAT
chr7:g.141764673G>T
chr11:g.74098165G>A
chr8:g.130137026G>T
chr5:g.180947587G>C
chr3:g.113453796C>T
chr11:g.64569692G>A
chr11:g.68587988A>G
chr19:g.885908G>A
chr1:g.246665743C>T
chr1:g.175391403G>A
chr13:g.75713191G>T
chr11:g.26563132G>A
chr7:g.16627112G>A
chrX:g.50393280T>C
chr13:g.106494978T>A
chr7:g.34848570C>A
chr2:g.27443241G>A
chr2:g.1496087C>T
chr5:g.37703044G>A
chr12:g.57206700C>T
chr5:g.126603721_126603722insTCAATTTCACAAAACACATAAACTCCACCT
chr7:g.21690866T>C
chr5:g.80559513C>T
chr16:g.75656660delA
chr14:g.74799611T>G
chr7:g.55173057G>A
chr13:g.110150303C>T
chr21:g.44627722T>C
chr1:g.23193967G>T
chr5:g.131479560C>T
chr2:g.162277546A>C
chr6:g.31676996G>A
chr6:g.12161465C>T
chr11:g.64221025C>T
chr9:g.17786522T>C
chrX:g.107647691G>A
chr14:g.92652013G>A
chr4:g.5628722delC
chr6:g.31161553G>A
chr15:g.58887316G>T
chr16:g.18340311G>A
chr1:g.26285463C>T
chr1:g.155771132C>T
chr17:g.74253210G>A
chr12:g.109216637G>A
chr14:g.100325790G>A
chr1:g.200908743G>A
chr8:g.26370453T>C
chr6:g.131675092G>A
chr14:g.22924325C>T
chr19:g.57244033G>A
chr11:g.5440678delG
chr17:g.18635560G>A
chr18:g.9337235_9337236insT
chr19:g.13983527C>T
chrX:g.111301630C>T
chr11:g.50420204A>G
chr5:g.141409201A>G
chr7:g.21702738T>C
chr5:g.113433726C>T
chr19:g.1481916C>T
chr11:g.67633061C>T
chr16:g.10903880C>T
chr10:g.34399362G>A
chr12:g.34025880G>A
chr21:g.44900449C>T
chr19:g.10560370G>A
chr12:g.131778079G>A
chr21:g.43959824G>A
chr19:g.47082251delCTTCTTTGGGAGTTCGATGTCATGGCTAAAATTACAGTGGTC
chr4:g.5694464C>T
chr5:g.157732940G>T
chr11:g.67433396G>A
chr3:g.119732451_119732452insTATTGTTCTG
chr7:g.106869396C>T
chr10:g.102657213G>A
chr6:g.20488116C>T
chr1:g.145671398G>A
chr7:g.22729569A>T
chr19:g.58550414G>A
chr7:g.75422491G>A
chr17:g.37283272T>C
chrX:g.153688679C>T
chr14:g.21429102T>C
chr19:g.42294726T>G
chr1:g.205381661A>T
chr4:g.186533946C>T
chr6:g.11005389C>T
chr12:g.48918768G>T
chr18:g.53499501T>C
chrX:g.107088756delC
chr1:g.1398668C>T
chr17:g.39994959C>G
chr11:g.67245321C>T
chr2:g.73491459G>T
chr18:g.76925392C>T
chr1:g.33864149C>A
chr13:g.114246961C>T
chr3:g.32713323A>G
chr10:g.7579893G>A
chr3:g.49013326G>A
chr12:g.52365021G>A
chr21:g.26480383C>A
chr1:g.158717540C>T
chr11:g.1105361G>A
chr12:g.67310156delA
chr12:g.80279092G>A
chr9:g.89363935C>T
chr17:g.63488669C>T
chr1:g.186123197C>G
chrX:g.154546087G>A
chr1:g.214620695G>A
chr3:g.184291181C>T
chr2:g.63045097C>T
chr21:g.16194555A>G
chr19:g.12627860C>T
chr15:g.40955573G>A
chr2:g.130358918G>A
chr10:g.52271441G>A
chr11:g.6401215A>G
chrX:g.141697592C>T
chr14:g.21030598A>C
chr17:g.7446911G>C
chr19:g.39878004delA
chr8:g.123356417G>A
chr12:g.8521139T>G
chr19:g.17553595C>T
chr11:g.62532096G>A
chr7:g.126533171C>T
chr5:g.40854036G>C
chr6:g.105100970G>A
chrX:g.41170502C>A
chr2:g.97772372_97772373insGGCTGG
chr4:g.73091291C>A
chr2:g.36808557G>A
chr2:g.189853967G>A
chr2:g.169633172C>A
chr7:g.74099165T>C
chr5:g.3599483G>A
chr1:g.86125125G>T
chr18:g.12686415delAT
chr9:g.128309770C>T
chr7:g.2712390C>T
chr12:g.54462684_54462685insGAATATGGCCTTTTAAAAGAA
chr7:g.100823687G>T
chr15:g.75780865G>A
chr17:g.10501430G>A
chr19:g.17530857C>T
chr18:g.36730675G>T
chr20:g.45947683G>A
chr17:g.10313249C>T
chr2:g.216113038A>G
chr1:g.18365521G>A
chr19:g.1828028C>T
chr1:g.155929771T>C
chr14:g.64769589C>T
chr8:g.6935852G>T
chr14:g.24329452G>A
chr22:g.29050503C>T
chr5:g.90840908C>T
chr1:g.112710245C>T
chr5:g.69320434G>T
chr19:g.17648514G>A
chr11:g.9789317G>C
chr3:g.47572789C>T
chr16:g.46729070A>C
chr5:g.36962184G>A
chr2:g.71428612G>C
chr5:g.132892046G>T
chr18:g.70028745A>C
chr1:g.165428875A>C
chr12:g.45927511T>G
chr11:g.12883053C>T
chr2:g.209695055C>T
chr2:g.241723038C>A
chrX:g.44261286C>T
chr19:g.10684418G>C
chr4:g.36119712C>T
chr9:g.37512655G>T
chr8:g.123254454A>G
chr17:g.1125261C>A
chr11:g.2422959G>A
chr20:g.37519057G>A
chrX:g.15248814A>G
chr12:g.101765009C>T
chr5:g.32090925C>A
chr4:g.121861613G>A
chrX:g.71387440G>A
chr3:g.128341423delG
chr6:g.32976076T>C
chr3:g.47588250G>T
chr11:g.108295003G>A
chr9:g.91723855T>A
chr2:g.208304288A>G
chr12:g.33376881A>G
chr3:g.50256810C>A
chr6:g.142088370C>T
chrX:g.154435710A>T
chr2:g.9490110G>A
chrX:g.132082526C>A
chr16:g.67258351G>A
chr8:g.52657494C>T
chr3:g.123700864G>A
chr11:g.67604987G>A
chr2:g.178531429A>G
chr11:g.82933827C>A
chr6:g.89803426G>A
chr10:g.29491008G>A
chrX:g.73447350G>A
chr5:g.76833425C>T
chr14:g.53950267C>T
chr20:g.31845392G>A
chr16:g.48362204G>T
chr18:g.8783534A>G
chr3:g.98283089C>A
chr10:g.35530153A>G
chr1:g.163345805G>T
chr17:g.7581548G>C
chr4:g.3186720G>A
chr8:g.123105356G>T
chr3:g.186804627G>A
chr19:g.57232650C>T
chrX:g.79363527C>A
chr5:g.81086939C>T
chr2:g.102424085C>T
chr3:g.98283602G>A
chr21:g.44788077G>A
chr4:g.56355217A>G
chr16:g.2043649G>A
chr20:g.17494192G>T
chr4:g.41939224C>T
chr12:g.827284G>T
chr17:g.8232985T>C
chr20:g.8881735C>T
chrX:g.10212513C>T
chr19:g.17974130G>T
chr5:g.55277174C>T
chr19:g.50518156G>A
chr2:g.53896853delT
chr19:g.16082046G>A
chr20:g.20056041G>A
chr8:g.85655114T>A
chr16:g.28605901C>T
chr19:g.55592516G>A
chr2:g.47155182T>C
chr15:g.58894166T>C
chr18:g.63595125A>G
chr7:g.151214135G>A
chr15:g.69037180C>T
chr5:g.161890897G>A
chr13:g.37044176C>T
chr1:g.228341613G>A
chr15:g.59458602G>A
chrX:g.120544152A>G
chr16:g.81607609G>T
chr1:g.202748958G>T
chr1:g.28150633G>A
chr3:g.121488745C>A
chr16:g.69694094G>A
chr6:g.52751624C>T
chr16:g.30724084G>A
chr12:g.52428698G>A
chr1:g.22576810C>T
chrX:g.106205988T>C
chr10:g.119672602G>A
chr17:g.68983837G>A
chr2:g.201217712C>A
chr12:g.112896785G>A
chr6:g.41736214T>C
chr18:g.49430415T>A
chr10:g.124044740G>A
chr3:g.42632803A>G
chr1:g.183969369C>T
chr13:g.99965565C>T
chr16:g.46621306C>T
chr9:g.123044G>A
chr11:g.64773455C>A
chr6:g.42864942G>A
chr12:g.32745086C>T
chr12:g.71872113G>T
chr16:g.66390557C>T
chr17:g.5388646delT
chr12:g.100396403C>T
chr3:g.171612412G>A
chr17:g.28734090G>A
chr12:g.55953361delC
chrX:g.55007309G>T
chr8:g.39838249G>A
chr13:g.52703655C>T
chr11:g.30011676C>T
chr22:g.39101960C>T
chr1:g.170034484A>C
chr4:g.113367573G>A
chr7:g.135691229delC
chr7:g.103498237G>A
chr17:g.7675232G>A
chr8:g.22624319C>T
chr6:g.15615368C>A
chr17:g.60190619C>T
chr13:g.94578015A>G
chr15:g.101048583A>G
chr1:g.244055125C>T
chr4:g.664212A>T
chr10:g.52771473T>C
chr1:g.179109329C>T
chr2:g.232850274G>A
chr2:g.165991478G>A
chr10:g.122937755G>A
chrX:g.47239082G>T
chr6:g.46692137A>G
chr17:g.50696122G>C
chr7:g.107362311T>C
chr22:g.22099083G>A
chr13:g.48379592A>G
chr10:g.63215443G>A
chr10:g.46357755G>A
chr17:g.7674948T>A
chr6:g.50843214C>T
chr2:g.69804558C>T
chr2:g.45008996C>T
chr6:g.158095658A>G
chr16:g.84130046C>T
chr3:g.31683772C>T
chr1:g.237784554C>T
chr5:g.141389466C>A
chr2:g.169256128C>T
chr7:g.25226713G>C
chr4:g.344341C>T
chr19:g.3578788C>T
chr16:g.67957991G>T
chr11:g.33096884C>T
chr19:g.12044158G>A
chr1:g.114608775G>T
chr6:g.43018941G>A
chr6:g.12122990C>A
chr19:g.3589858C>T
chr2:g.46543014G>A
chr7:g.134933250G>A
chr2:g.219469344G>A
chr20:g.44727264G>C
chr16:g.28835653T>C
chr15:g.68289747T>C
chrX:g.47804788A>T
chr17:g.47847834G>A
chr14:g.76201757G>A
chr12:g.49955517C>T
chrX:g.134393944A>G
chr6:g.1726454C>T
chr19:g.55191506G>T
chr5:g.23526345A>G
chr2:g.130764136C>T
chr9:g.133540884G>A
chr17:g.30899216G>A
chr12:g.6967915G>T
chr20:g.64070223G>A
chr11:g.71498505C>T
chr1:g.25392103G>A
chr7:g.48274295T>G
chr17:g.1733618C>A
chr1:g.68438942C>A
chr1:g.23059159G>A
chr19:g.37414041C>A
chr11:g.7059968C>T
chr16:g.69163161G>A
chr11:g.236177C>G
chr6:g.150022203C>A
chr3:g.18420788C>T
chr12:g.58882946A>G
chr5:g.134661229G>T
chr19:g.9467832C>T
chr14:g.22920991C>T
chr6:g.161107932T>G
chr8:g.73825238T>C
chr10:g.33192376G>T
chr19:g.17775468G>A
chr6:g.155137191G>A
chr6:g.31589142C>T
chr2:g.238329196delA
chr8:g.38982504C>T
chr21:g.44326720G>A
chr7:g.51028238T>C
chr5:g.140787398G>A
chr12:g.14622183G>T
chr17:g.9643056A>G
chr3:g.57240476T>C
chr6:g.132711785T>C
chrX:g.31929651T>C
chr14:g.51247137G>C
chr19:g.8976815G>A
chr17:g.7831476C>A
chr20:g.6115957T>C
chr10:g.13186229C>A
chr20:g.43726332delA
chr1:g.247841666A>G
chr4:g.69107209C>A
chr2:g.119681688G>A
chr14:g.81479719A>C
chr3:g.158203120G>C
chr15:g.89321751G>A
chr11:g.108510521G>A
chr6:g.165336142G>A
chr4:g.36177926A>G
chr1:g.210404664G>A
chr1:g.147043020G>A
chr12:g.55727231C>T
chr14:g.64541530C>T
chr12:g.95658967delA
chr1:g.89382699G>A
chr10:g.6217169C>T
chr7:g.139284332C>T
chr2:g.26465998G>A
chr1:g.219927973_219927974insATGCTTTTTTTCTGTTTTGTTTTTTTT
chr7:g.33095246A>G
chr15:g.40621918T>C
chr2:g.36808687C>G
chr6:g.30712397G>T
chr10:g.29291913G>T
chr16:g.4258137G>A
chr1:g.152699254T>C
chr21:g.44697820C>T
chrX:g.154488718C>T
chr13:g.25699277G>A
chrX:g.77600496A>C
chr11:g.3659715C>T
chr9:g.122675376G>A
chr6:g.55282330delG
chr13:g.72931219A>G
chr1:g.200911555C>T
chr10:g.104358609C>T
chr2:g.84557778T>G
chr22:g.43683781G>A
chr3:g.132642738A>G
chr8:g.143917228C>T
chr12:g.4370330C>T
chr15:g.40621634G>T
chr12:g.2679684C>T
chr19:g.43355687T>A
chr17:g.18278061T>A
chr7:g.44533361G>C
chrX:g.91879310delT
chr10:g.1363731G>A
chr3:g.45828582C>A
chr1:g.56767829G>A
chr15:g.43292741G>A
chr19:g.16749929C>T
chr10:g.45834067A>C
chr7:g.144051326A>C
chr8:g.21976481C>T
chr12:g.70622483G>C
chr1:g.21835546T>C
chr17:g.40095633C>A
chr15:g.29732767G>A
chr8:g.109465160C>T
chr1:g.247574301A>G
chr1:g.228319145C>T
chr3:g.87273415G>T
chrX:g.100407603A>G
chr16:g.66885855C>T
chr15:g.36808420G>A
chr19:g.9528959C>T
chr6:g.26465281_26465282insTTGCCGGGATCATTTCTTTC
chr19:g.14950365C>T
chr17:g.78134903C>A
chr4:g.154321036C>A
chr11:g.113733670C>T
chr9:g.104598983A>C
chr10:g.69250307G>A
chr1:g.36303813C>T
chr19:g.9093459G>C
chr5:g.141577524G>T
chrX:g.66266503A>G
chr2:g.197408517A>G
chr6:g.79947230_79947231insTCC
chr12:g.4912224C>T
chr5:g.68293726_68293727insGATAATATTGAAGCTGTAGGGAAAAAATTACAT
chr14:g.90689551G>A
chr12:g.117524997G>A
chr1:g.148572586T>C
chr7:g.117627567G>A
chr10:g.59804432G>A
chr14:g.24182374G>A
chr9:g.136506954G>A
chr19:g.54847241C>A
chr4:g.56315959G>A
chr6:g.39540003C>A
chr3:g.1373671G>C
chr16:g.65285427G>A
chrX:g.152135601C>T
chr17:g.28716019C>T
chr8:g.91393975_91393976insAGAATTAAAATAGGATACC
chr1:g.179088084T>C
chr11:g.130880676G>A
chr8:g.135548800A>G
chr10:g.86716473G>A
chr16:g.30583380G>A
chr17:g.3656696C>T
chr7:g.101137049G>C
chr3:g.38008063C>A
chrX:g.152638305G>A
chr22:g.39968073delCC
chr9:g.70620333T>C
chrX:g.107628473G>A
chr19:g.50519257C>A
chr19:g.39607226delAAG
chr7:g.149103952C>T
chr1:g.175077673C>A
chr12:g.120738532G>A
chr9:g.133104265T>C
chr1:g.78492888G>A
chr19:g.18059577C>T
chrX:g.107216703T>C
chr2:g.189720737G>T
chr14:g.76789125delG
chr1:g.2487355G>A
chr4:g.56354118C>A
chr6:g.143497394T>C
chrX:g.49231714G>A
chr8:g.107497452A>T
chr16:g.55327721C>G
chr6:g.133462333A>T
chr17:g.39030938G>A
chr19:g.10632099C>A
chr16:g.2234591G>A
chr3:g.129532712G>A
chr15:g.74845024G>A
chr6:g.47878317C>T
chr7:g.139283976C>T
chr2:g.218827598C>T
chr10:g.20809900T>C
chr7:g.27832726C>T
chr5:g.141179414C>T
chrX:g.119870626C>T
chr6:g.12121314G>C
chr1:g.236482601C>T
chr6:g.157645812C>T
chr22:g.16592461C>T
chrX:g.34943908C>T
chr1:g.21814625G>A
chr10:g.15128448G>A
chrX:g.124481756C>G
chr19:g.51944833G>A
chr17:g.62725026G>A
chr19:g.55085890G>T
chr3:g.52806383G>A
chr13:g.48496276T>C
chrX:g.148955793C>T
chr2:g.69544400G>A
chrX:g.77683437delC
chr10:g.93665377G>A
chr2:g.169614652A>G
chr4:g.108759879C>A
chrX:g.108580543G>T
chr9:g.74762080G>A
chr7:g.57463145A>G
chr14:g.100929984G>T
chr1:g.91316422_91316423insT
chr19:g.32709232T>C
chr1:g.40064517_40064518insGGTT
chr15:g.63062635T>G
chr6:g.109546096G>A
chr3:g.150678546G>A
chr14:g.95668219G>A
chr9:g.21166377A>T
chr1:g.154544033G>A
chr8:g.10700383C>T
chr1:g.26572234G>A
chr14:g.22813357C>T
chr10:g.47310351C>T
chr2:g.152126220G>A
chr7:g.98964660C>T
chr17:g.17797659G>A
chr22:g.35552000G>A
chr1:g.161100210C>T
chr6:g.33688324G>A
chr3:g.122568779A>G
chr6:g.50772767C>T
chr17:g.78972334C>T
chrX:g.108174579G>T
chr19:g.41892108C>T
chr22:g.49886402G>A
chr18:g.79374067C>T
chr9:g.66991119G>A
chr4:g.112441227G>C
chr15:g.57712173G>T
chrX:g.18647297C>G
chr3:g.108830774C>T
chr16:g.67098886G>A
chr3:g.109057368C>T
chr11:g.56276200C>T
chr18:g.32111894G>A
chr5:g.157343028T>C
chr1:g.248323663C>A
chr1:g.196747222A>T
chr2:g.99462609G>A
chr12:g.102419517T>C
chr11:g.121109345C>T
chr19:g.10391368G>T
chr16:g.29862779C>T
chr8:g.18400101G>A
chr7:g.105077341delAA
chr8:g.11322723G>A
chr1:g.2588372G>A
chr16:g.48086764C>A
chrX:g.14912295delTTGATTCAAAAGTGAAAGCTTTCAAGAAACCAT
chr2:g.89040682G>T
chr17:g.35863000C>A
chr1:g.54212611C>A
chr12:g.55724378G>A
chr20:g.3864398C>A
chr1:g.181651471C>A
chr13:g.41192781G>A
chr6:g.136614260A>G
chr20:g.33791220C>T
chr12:g.21765708G>A
chr4:g.99126719T>C
chr7:g.152148600delGA
chr7:g.16706128C>T
chr10:g.102424545G>A
chr4:g.153585603A>G
chr1:g.152309919C>T
chrX:g.110450873G>C
chr8:g.118924440C>T
chr11:g.66858118T>C
chr20:g.24949411G>A
chr9:g.82990453T>G
chr6:g.160731805C>T
chr1:g.173501069C>A
chr4:g.119031683T>C
chr5:g.168204579G>A
chr1:g.150473267G>T
chr16:g.66885673C>T
chr6:g.87256584T>G
chrX:g.41224885A>G
chr14:g.41887124G>T
chr2:g.178572752C>G
chr16:g.35170162C>T
chr8:g.17754350_17754351insAAGACAACAAACA
chr17:g.44091484C>T
chr12:g.9095065A>G
chr16:g.48083948A>G
chr7:g.66783693C>T
chr16:g.75235684G>A
chr12:g.132649846G>T
chr11:g.19055437C>T
chr2:g.238253265G>T
chr7:g.149782870G>T
chrX:g.72207189A>G
chr10:g.109870012C>A
chr4:g.183253917G>A
chr11:g.126406838C>T
chr1:g.62864108T>A
chr1:g.247876249_247876250insCCCAGTAATG
chr18:g.63710349G>A
chr9:g.127808590C>G
chr3:g.129572617C>T
chr4:g.5015126G>T
chr6:g.35955174C>T
chr3:g.50640392G>A
chr7:g.101137495G>A
chr6:g.47680193T>C
chr22:g.20883512G>A
chr20:g.58651946delAATA
chr2:g.178579130C>G
chr17:g.16764080G>A
chr17:g.80117062G>A
chr19:g.49430588C>T
chr1:g.18854584C>T
chr3:g.50380000C>T
chr1:g.90916926G>A
chrX:g.2881145C>T
chrX:g.23393439G>A
chrX:g.48823994G>T
chr13:g.114250668T>C
chr20:g.4175048C>T
chr2:g.178570640G>A
chr2:g.47783274C>A
chrX:g.48194180C>T
chr16:g.69118548_69118549insGGGAG
chr15:g.33601541C>T
chr19:g.42081065G>A
chrX:g.108696383delTTGAAGAATTCC
chr19:g.6664996C>T
chr1:g.13225205C>A
chr19:g.53140611G>A
chr3:g.69071599G>A
chr22:g.45332584T>C
chr12:g.123783953G>T
chr20:g.58651926G>T
chr17:g.7675153delG
chr17:g.6425823C>T
chr21:g.44293811G>A
chr19:g.2426157C>A
chr17:g.32305373G>A
chr1:g.77964252A>C
chr9:g.136946529C>T
chr21:g.42288296G>C
chr7:g.120989667C>T
chr1:g.45568612T>C
chrX:g.149582153G>A
chr11:g.49154417C>A
chr14:g.74409434T>A
chrX:g.77696582delG
chr11:g.118645650G>A
chr3:g.167242615G>T
chrX:g.16755082T>A
chr1:g.22078476G>T
chr5:g.150896791A>C
chr2:g.106468282A>T
chr9:g.129808965G>A
chr4:g.64314657G>T
chrX:g.27980174A>G
chr2:g.17721219G>A
chr7:g.21906420G>A
chr5:g.55410537delCTT
chr10:g.101003757C>A
chr2:g.138550912G>A
chr12:g.6940983C>T
chr1:g.40258134G>A
chr8:g.26379733G>A
chr14:g.44963633C>G
chr4:g.86807757_86807758insA
chr2:g.237540861C>T
chr14:g.50188527A>C
chr1:g.110341335C>A
chr14:g.94619410G>A
chrX:g.77664668delT
chr18:g.3597180_3597181insT
chr20:g.34979741G>A
chr7:g.102457857C>T
chr19:g.41242908C>T
chr1:g.198540575T>C
chr1:g.1450695C>T
chr4:g.88656066T>C
chr1:g.43446359delCAAA
chr3:g.185443628A>G
chr12:g.47078857G>A
chr22:g.35720632G>A
chr3:g.108047150G>A
chr1:g.26022981G>A
chr2:g.37070289C>A
chr13:g.49559941T>C
chr12:g.43551067A>G
chr10:g.44977592C>A
chr18:g.14850278C>A
chr2:g.178602088G>A
chr4:g.86000692C>T
chr10:g.37219461A>G
chr19:g.40718200C>T
chr14:g.70048938C>T
chr9:g.129641921T>C
chr7:g.134934042G>T
chr4:g.152975754C>A
chr5:g.178144011G>A
chr11:g.67502302C>T
chr17:g.80048591C>A
chr9:g.114406758G>T
chr16:g.3140966G>A
chr10:g.124974268T>C
chr12:g.30630797C>A
chrX:g.124520601C>T
chr3:g.108589285G>A
chr12:g.4654828G>A
chr1:g.39562174T>C
chr17:g.41424177G>A
chr19:g.17816786G>A
chr12:g.122473917C>T
chr2:g.240763335T>C
chr20:g.1466746G>T
chr15:g.49016902G>A
chr4:g.127767172C>T
chr19:g.10391575G>A
chrX:g.71129720A>G
chr1:g.158973670A>G
chr18:g.32680259G>A
chr3:g.7146484C>T
chr19:g.35449952G>A
chr1:g.152220792C>T
chr13:g.44436756G>C
chr1:g.46309103G>T
chr5:g.96896742delT
chr14:g.59603235delGTAGA
chr2:g.230417665G>T
chrX:g.103063172C>T
chr2:g.178589050C>T
chr9:g.128713603G>C
chr2:g.108659642C>T
chr2:g.47813350A>T
chr15:g.22460923C>A
chr6:g.75947395C>T
chr17:g.50552075C>T
chr11:g.74001347C>T
chr11:g.103177758C>T
chr5:g.141580861T>C
chr1:g.33586540A>G
chr15:g.20438640G>T
chr3:g.118930181G>A
chr4:g.56966712C>A
chr13:g.35476009C>T
chr3:g.119216314C>T
chr2:g.96024588C>T
chr19:g.18444852C>A
chr1:g.92147212A>G
chr8:g.60208788C>T
chr11:g.111742664G>A
chr9:g.126880861A>G
chr13:g.26665107C>G
chr6:g.42179420C>T
chr19:g.17579487G>A
chr21:g.46509351G>T
chr7:g.98927210T>C
chr1:g.3771590C>T
chr6:g.1960826C>T
chr14:g.22604037C>T
chr7:g.144185547C>A
chr12:g.132197162C>A
chr10:g.58227114C>T
chr11:g.47290607C>T
chr19:g.57750792T>C
chr1:g.158644351G>A
chr17:g.41516942G>A
chr19:g.18855955C>T
chrX:g.153347039G>A
chr1:g.152088009delA
chr4:g.69647075A>C
chr13:g.42199613G>A
chr17:g.50080372C>T
chr10:g.75043899G>A
chr7:g.74042642T>C
chr20:g.36240387C>T
chr19:g.42292179C>T
chr14:g.94448556G>T
chr17:g.63910790G>C
chr12:g.70332766G>T
chr7:g.5359514T>G
chr7:g.99762228G>C
chr8:g.138878235C>A
chr17:g.41569484T>A
chr20:g.47634151A>T
chr9:g.84288180T>A
chr4:g.119027190G>T
chr8:g.55524051T>C
chr1:g.229637636delT
chr11:g.65583538G>A
chrX:g.24841818C>A
chr1:g.57290989G>A
chr2:g.32463379C>T
chr1:g.55172491C>T
chr7:g.98911225C>T
chr18:g.3255933C>T
chr8:g.124049739G>C
chrX:g.152990736C>T
chr9:g.35675909C>T
chr16:g.1777156C>T
chr10:g.98253732C>T
chrX:g.102715981A>G
chrX:g.106612062G>A
chr19:g.47432345G>A
chr21:g.40144678G>A
chr12:g.29506892C>T
chr10:g.122598009G>A
chr12:g.49052138C>T
chr11:g.75457746C>T
chr5:g.69400052C>T
chr13:g.40982034C>G
chr12:g.122200297G>A
chr12:g.62525090T>G
chr3:g.98087787T>A
chr3:g.27311008G>A
chr19:g.37363096C>T
chr17:g.7572842A>C
chr1:g.17616196G>A
chr19:g.36149857G>A
chr1:g.214402885G>A
chr11:g.130190505C>T
chrX:g.135360461G>T
chr12:g.53290449G>A
chr18:g.72858880_72858881insA
chr4:g.158682421G>A
chr19:g.37599699G>T
chr1:g.113940424C>T
chr16:g.3025970C>A
chr3:g.179218306C>G
chr1:g.207091746T>A
chr17:g.28612654C>T
chr5:g.176532070G>A
chr12:g.56716802G>A
chr19:g.8979058G>A
chr16:g.58580730G>A
chr15:g.22542139C>A
chr7:g.2364482_2364483insCCCCTCC
chr14:g.102042115A>G
chr12:g.56929461C>T
chr15:g.63753007T>C
chr17:g.37632253C>T
chr2:g.31365528G>A
chr5:g.163460119G>A
chr19:g.4510822G>A
chr11:g.1083661G>A
chr3:g.134559275G>A
chr9:g.125018828C>T
chr10:g.125766656delTTC
chr17:g.40555507G>A
chr7:g.143571883T>A
chr4:g.174682829G>A
chr2:g.219004306G>A
chr1:g.183574488C>T
chr11:g.66043407G>A
chr11:g.72228438C>A
chr11:g.17301753C>T
chr1:g.162597854G>T
chr11:g.55343464C>T
chr14:g.24311412G>A
chr1:g.147618969C>T
chr1:g.20864571C>T
chr1:g.99896315C>T
chr12:g.91055923A>G
chr22:g.30468860_30468861insTCA
chr12:g.111347718G>T
chr19:g.6183202G>A
chr12:g.120438117C>G
chrX:g.48906525A>T
chr1:g.150559303G>A
chr6:g.158095931G>A
chr2:g.27256818G>A
chr16:g.16131935G>T
chr10:g.26224610T>C
chr6:g.105161964G>T
chr1:g.196685138G>A
chr11:g.62522530C>T
chr17:g.19413394G>A
chr15:g.99221832G>A
chr10:g.93063035G>C
chr7:g.145005921A>G
chr17:g.27789645G>A
chr9:g.131197826A>G
chr1:g.237887513C>T
chr20:g.5924973A>G
chr7:g.44760177C>T
chr15:g.68205392C>T
chr12:g.49037294C>T
chr6:g.38722823C>T
chr7:g.16698063C>A
chr13:g.99562815A>G
chr7:g.41689941G>T
chr12:g.110436668_110436669insATTCAT
chr17:g.57674987G>A
chr19:g.49620405C>A
chr3:g.47845834A>G
chr11:g.6169671G>T
chr10:g.29529705G>A
chr18:g.8793019C>T
chr6:g.52404008C>T
chrX:g.136874415C>T
chr3:g.38725196G>A
chr1:g.193141887G>C
chr16:g.2037921A>G
chr3:g.63988225C>T
chr6:g.47808257T>A
chr17:g.2318833T>C
chr4:g.186232277A>T
chr12:g.31102954C>T
chr10:g.96387033C>T
chr2:g.218164178T>C
chr17:g.63832007T>C
chr19:g.2076844G>A
chr1:g.42851353G>A
chr11:g.102776618G>T
chr20:g.21387006G>T
chr11:g.65088061G>A
chr15:g.26547734G>T
chrX:g.135912836C>T
chr5:g.665060G>A
chr19:g.55911941C>T
chr2:g.241209299C>T
chr19:g.8962479G>A
chr8:g.140585289C>T
chr8:g.99192943A>G
chr17:g.1613264G>A
chr17:g.35778817A>C
chr1:g.201969597C>T
chr20:g.48688678A>G
chr21:g.44312262G>A
chr8:g.143811210C>T
chr1:g.225937567G>T
chr16:g.20545238G>C
chr2:g.140541054A>G
chr19:g.48745769G>T
chr17:g.59194843T>G
chr7:g.100057334C>T
chr12:g.124012497G>T
chr17:g.41378017C>A
chr12:g.18081271C>A
chr3:g.32885943G>A
chr2:g.186828792T>A
chr21:g.10605546C>T
chr20:g.46371457G>A
chr9:g.122392389T>G
chr11:g.62910311G>A
chr14:g.102414744T>C
chr17:g.79794589G>A
chr3:g.171126016G>A
chr15:g.81349554A>G
chr22:g.43964501A>G
chr7:g.115950917G>A
chr11:g.68426004G>A
chr6:g.3105548delG
chr11:g.119097984G>A
chr4:g.174299173C>T
chr9:g.8518239delACTT
chr11:g.65038598G>A
chr1:g.181776170G>A
chr1:g.33586610G>A
chr1:g.33372352G>A
chr6:g.33085110C>A
chr11:g.75587827A>T
chr13:g.32338149G>A
chr20:g.39030711C>T
chr3:g.3845420A>G
chr11:g.48488900C>A
chr20:g.52191641G>A
chrX:g.40071039delG
chr1:g.151176503C>T
chr19:g.40506358C>T
chr19:g.40876541A>G
chr17:g.59668926A>C
chr9:g.70810081_70810082insTGTTAAAG
chr1:g.78536623A>C
chrX:g.47563225G>T
chrX:g.78046319T>G
chr12:g.26602370C>A
chr1:g.22913625G>A
chrX:g.30309370C>T
chr8:g.38242309G>T
chr3:g.13637800C>T
chr6:g.31864860C>T
chr6:g.17760827C>T
chr4:g.150871438G>A
chr19:g.50827729G>A
chr1:g.248406729C>T
chr21:g.45992397G>A
chr2:g.147948128T>G
chr14:g.21353544C>T
chr19:g.15361793A>C
chr12:g.103982910C>T
chr15:g.58892897C>A
chr15:g.34982689A>G
chrX:g.149716026C>A
chr19:g.15022931G>A
chr2:g.106077906G>A
chr1:g.237589898G>T
chr19:g.45470923C>T
chr4:g.69493781T>A
chr2:g.24039322T>A
chr9:g.101475799G>A
chr2:g.33521978G>T
chr11:g.67487142C>T
chr17:g.79047921G>A
chr11:g.47472280G>A
chr2:g.44244231G>A
chr4:g.151132353delTC
chr6:g.116724340G>A
chr15:g.28124093G>A
chr20:g.31643495T>C
chr4:g.25818250G>A
chr9:g.137955735C>T
chr11:g.865520G>T
chr17:g.31325956delT
chr6:g.83138417C>A
chr16:g.1212039G>A
chr2:g.176153008G>A
chr1:g.152306230G>A
chr17:g.7673608delGCTAGGAAAGAG
chr18:g.54294499G>A
chr15:g.72346187C>T
chr12:g.56142846C>T
chr1:g.15056237G>A
chr10:g.25598723G>T
chr6:g.89149343C>A
chr21:g.42103934G>A
chr11:g.65506086T>C
chr2:g.73490841C>T
chr11:g.64221083G>A
chr1:g.156200019_156200020insGAAGACC
chr2:g.178618655T>C
chr5:g.43298767A>T
chr2:g.209723619G>A
chr2:g.240139345G>A
chr20:g.23365108G>C
chr1:g.167856289C>T
chr16:g.31476075G>A
chr2:g.18563899A>G
chr1:g.155951014G>A
chr11:g.108287653delGAC
chr8:g.56168341G>A
chr7:g.65398949_65398950insTCTAGT
chr12:g.57201511G>A
chr15:g.64406436_64406437insTTAGTTGTAC
chr12:g.124912889G>T
chr3:g.3037232C>A
chr2:g.178116379_178116380insAAAATAATG
chr19:g.1231249G>A
chr9:g.67859371G>T
chr7:g.106022337C>T
chr14:g.64773311T>G
chr6:g.87541947G>A
chr1:g.52381686G>T
chr20:g.62963354G>A
chr9:g.122392667_122392668insA
chr19:g.19544180C>T
chr6:g.132571360G>T
chr11:g.1025338G>A
chr20:g.46503044_46503045insAAAACTAATTCAGAAGTAA
chrX:g.71563396C>T
chr7:g.128854057C>T
chr21:g.18344042G>T
chr2:g.235717633A>C
chr6:g.73808111_73808112insT
chr1:g.160841370G>A
chr1:g.46813479C>A
chr11:g.103156506C>G
chr21:g.32666033G>A
chr3:g.133400096C>T
chr15:g.78768260C>A
chr17:g.18978297C>T
chrX:g.154930788delG
chr11:g.33287344_33287345insA
chr10:g.23037384C>T
chr20:g.58676232A>G
chr9:g.71685275G>A
chrX:g.77681589C>A
chr4:g.71029445delC
chrX:g.108735813C>G
chr7:g.77627141G>A
chr22:g.38481356T>C
chr11:g.57414951C>T
chr6:g.88143785C>T
chr6:g.31767156A>G
chr18:g.23370242C>T
chr4:g.133151285T>C
chrX:g.135577271C>T
chr15:g.50604868T>G
chr9:g.113594312C>T
chr11:g.5857420T>C
chr8:g.143561140C>T
chr14:g.73961842C>T
chrX:g.77600512_77600513insA
chr9:g.119167354T>C
chr15:g.40459168G>A
chr6:g.127447114T>C
chr11:g.4915627C>T
chr19:g.8261715C>T
chr19:g.7746486G>A
chr19:g.51452568G>T
chr15:g.63643429C>T
chr1:g.248522541G>T
chr6:g.46688881G>A
chr5:g.69175090C>T
chr20:g.38246067G>A
chr9:g.121187007A>G
chr1:g.19745531C>T
chr2:g.151485883C>T
chr1:g.175147039C>T
chr1:g.71069294G>T
chr1:g.201041507G>A
chr1:g.173807450G>A
chr6:g.32186373G>A
chr19:g.2130456G>A
chr6:g.31892516G>A
chr11:g.840272C>T
chr16:g.32180627G>T
chr1:g.52950865G>A
chr14:g.77562477G>T
chr17:g.35868842G>A
chr8:g.105802456C>T
chr4:g.121161200G>A
chr11:g.48245104A>T
chr3:g.124913565C>T
chr20:g.44257201G>A
chr20:g.23605682C>A
chr18:g.10691247C>T
chr16:g.62021304G>A
chr1:g.148978046T>A
chr1:g.36301674C>T
chr17:g.46768473G>A
chrX:g.24179302G>A
chr16:g.90094606G>A
chr1:g.201520444C>A
chr4:g.6301904C>A
chr17:g.80348158C>A
chr19:g.1080930G>A
chr20:g.45834461A>G
chr8:g.81444905_81444906insTGTTGAAAAGGAGT
chr12:g.50473463A>G
chr16:g.57238928C>T
chr8:g.52656999G>C
chr2:g.219207765C>G
chr14:g.71730277A>G
chr1:g.203076363A>G
chr1:g.35739508C>A
chr16:g.23558191G>C
chr16:g.2001687G>A
chr3:g.31733283C>G
chr11:g.36280829C>T
chr3:g.133934801G>A
chr15:g.26883521G>A
chr21:g.44292995delC
chrX:g.1629897G>A
chr22:g.36265241G>A
chr13:g.108270397C>T
chr12:g.120313002G>A
chr2:g.233032851C>T
chr1:g.24337115A>G
chr12:g.11061800C>A
chr15:g.77614563G>A
chr10:g.24524401C>T
chr7:g.152180994C>T
chr4:g.117085053G>A
chr13:g.36865568C>T
chr19:g.36449158C>A
chrX:g.101554365_101554366insTTAACACAA
chr19:g.45392106G>A
chr2:g.85053463G>A
chr5:g.10426429A>T
chr16:g.19627750G>T
chr3:g.187698607G>A
chr10:g.77780518A>G
chr2:g.217848254G>A
chr20:g.62905733C>A
chr16:g.11887644G>T
chrX:g.16150465A>G
chr11:g.77701612A>G
chr4:g.140756011T>C
chr1:g.237566750G>A
chr3:g.149162861C>T
chr17:g.49043505G>A
chr3:g.149039128G>A
chrX:g.10138839G>A
chr1:g.19141521C>G
chr2:g.127187388C>A
chr2:g.151640570C>T
chr12:g.6777790G>T
chr11:g.62530492G>A
chr15:g.65887976T>A
chr7:g.149432535G>A
chr14:g.19780651C>T
chr9:g.89388965C>T
chr16:g.31111343G>T
chr1:g.35636413C>A
chr1:g.167697190C>T
chr20:g.56399277A>G
chr2:g.19353254G>T
chr17:g.19816778A>C
chr20:g.36607896C>T
chr3:g.98498448T>G
chrX:g.101837620A>G
chr2:g.21015188G>T
chr4:g.6042195G>A
chr22:g.29233651G>A
chr12:g.51975445G>A
chr2:g.95412702G>A
chr18:g.31331747C>A
chr9:g.87920287G>T
chr4:g.68951653C>A
chr1:g.155031593C>T
chr4:g.9239207T>A
chr1:g.159932425A>C
chr18:g.60372270G>A
chr2:g.241655271C>A
chrX:g.120366651G>A
chr10:g.70123446T>C
chr17:g.4894203T>C
chr21:g.41993269C>T
chr11:g.22341600C>T
chr6:g.132589019delAAGATCT
chr6:g.42268625C>A
chr17:g.40771700G>A
chr3:g.120638491delC
chr2:g.224876201A>T
chr1:g.6095532G>T
chr1:g.152312523C>T
chrX:g.150470954G>A
chr8:g.123347322G>C
chr19:g.54251977G>T
chr9:g.137243622G>A
chr4:g.54290351C>T
chr4:g.140622575G>A
chr1:g.37481826_37481827insCTTCTC
chrX:g.78114116C>A
chr20:g.25476610G>A
chr19:g.54462608C>T
chr14:g.99412862C>T
chr1:g.206496176C>T
chr1:g.54139919G>A
chr5:g.181224273G>A
chr21:g.30635328A>G
chr9:g.70352412_70352413insTTG
chr19:g.7617925G>A
chr17:g.82830448G>A
chr1:g.38874842C>T
chr2:g.241099746C>T
chr20:g.21512300G>A
chr5:g.87331417delTTATC
chr18:g.32207264A>G
chr2:g.32251602C>T
chr3:g.151337746T>G
chr10:g.94592484G>A
chr11:g.119335343G>T
chr4:g.166043375G>T
chr5:g.176584501C>A
chr2:g.235797848G>A
chr1:g.9733978A>C
chr20:g.50750578C>T
chr20:g.31845522G>A
chr9:g.101430884C>T
chr1:g.151133366G>A
chr4:g.110477000C>A
chr9:g.92112454C>T
chr15:g.23566258delC
chr1:g.85707923G>A
chr17:g.78537404C>T
chr12:g.121752132G>A
chr1:g.201217379G>A
chr12:g.109176248G>A
chr17:g.60656715A>G
chr11:g.554168C>T
chr1:g.26731548delCA
chr15:g.90500141G>T
chr16:g.74338803C>A
chrX:g.29920034T>C
chr2:g.221430126T>C
chr20:g.38546286G>T
chr17:g.48922852T>C
chr1:g.46565119G>T
chr21:g.29060615C>A
chr6:g.161087917C>A
chrX:g.48975269C>G
chr6:g.32157636G>T
chr14:g.19780973C>A
chr5:g.157055396C>G
chr1:g.12651242G>A
chr10:g.28614655C>A
chr10:g.63200570_63200571insAC
chr16:g.8897030C>T
chr1:g.77964163C>T
chr18:g.26916155G>A
chr11:g.66509149C>T
chr15:g.85581588G>A
chr8:g.140770734G>A
chr6:g.169670583T>A
chr16:g.56192319C>G
chr2:g.178740734G>C
chr11:g.6210352C>T
chr6:g.27865407G>C
chr1:g.154334152G>A
chr6:g.28125569A>G
chr13:g.112527009A>C
chr20:g.36432558G>T
chr10:g.102025192C>A
chr7:g.20159238A>G
chr14:g.94037444C>T
chr7:g.92222966G>A
chr1:g.100133159C>T
chr5:g.139322001C>G
chr1:g.145669912C>A
chrX:g.152990662C>A
chr1:g.208217649T>G
chr1:g.109507731G>A
chr1:g.220072954G>T
chr11:g.83225030A>C
chr20:g.46062732delGAG
chr20:g.37184179G>T
chr11:g.26563260T>C
chrX:g.21609070G>T
chr22:g.23161510G>T
chr11:g.27368432G>A
chr9:g.129061263G>A
chrX:g.54757469T>C
chr4:g.164197690G>A
chr8:g.27879682C>T
chr6:g.167338652T>C
chr19:g.45485721G>T
chr14:g.24163012G>A
chr7:g.142866095G>T
chrX:g.15543122T>A
chr17:g.29632149C>T
chr5:g.173163902G>A
chr8:g.102293683delA
chr13:g.32338811G>A
chr12:g.103980963G>T
chr3:g.185599018A>G
chr5:g.55290236T>C
chr15:g.90948167G>A
chr4:g.99529903A>G
chr15:g.59619251G>A
chr1:g.94062696G>T
chr9:g.34517369G>A
chr6:g.1313050C>T
chr4:g.88398146C>T
chr12:g.112916688_112916689insA
chr3:g.49015129delCTT
chrX:g.65532612T>C
chr11:g.62634339T>C
chr13:g.110482578G>A
chr3:g.136001335C>T
chr16:g.4343217C>T
chr17:g.45398043C>T
chr3:g.27162376G>A
chr12:g.56586927G>T
chr1:g.92063118C>T
chr11:g.64804474G>A
chr17:g.35155382C>T
chr2:g.138288157T>A
chr7:g.118234761G>T
chrX:g.35802374A>T
chr12:g.78119909C>A
chr14:g.23565957delCC
chr19:g.38837646G>A
chr12:g.55842372C>T
chr17:g.62031586G>A
chrX:g.19935896_19935897insACTAGTAT
chr1:g.18703166C>T
chr12:g.132141608T>C
chr1:g.1374220C>T
chr12:g.49026938C>T
chr4:g.3316295G>T
chr1:g.148103734A>G
chr17:g.3566928G>A
chr15:g.25223291C>T
chrX:g.97141734A>C
chrX:g.30855187G>T
chr16:g.67255466G>A
chr3:g.4674337G>A
chr8:g.33513552C>T
chr18:g.14478283C>T
chr20:g.20075608A>C
chr6:g.17817062C>A
chr14:g.71661322C>T
chr8:g.10607672C>A
chr1:g.228299403G>A
chr20:g.59001566G>A
chr11:g.130414597C>T
chr10:g.17235380A>T
chr2:g.188985669C>G
chr15:g.89903373A>G
chr2:g.178591466C>T
chr14:g.24373764C>T
chr3:g.45709550A>G
chr8:g.90995584G>A
chr7:g.2656475C>G
chr14:g.21357362G>T
chr2:g.36759117C>T
chr14:g.18977708T>G
chr3:g.74298137G>A
chr1:g.237793983C>T
chr19:g.11431167A>G
chr9:g.87886847G>A
chr8:g.109481457G>A
chr20:g.2483991G>C
chr16:g.67201617G>A
chr21:g.29160015C>T
chr16:g.21206934G>A
chr7:g.31707242G>A
chr9:g.135777376C>T
chr19:g.8975709T>C
chr8:g.132804696G>A
chr2:g.37227543C>T
chr11:g.126276101G>A
chr9:g.113988363C>T
chr17:g.81707021A>G
chr12:g.6529842C>T
chrX:g.119640720C>T
chr5:g.32126224C>T
chr2:g.189689892A>T
chr20:g.5580064A>C
chr20:g.50750050C>T
chr11:g.104947147G>T
chr15:g.101763475A>G
chr1:g.161305882C>T
chr11:g.113789329C>T
chr10:g.93566791G>T
chr1:g.153040257C>T
chr1:g.63545989G>T
chrX:g.78656959G>A
chr11:g.5059511G>A
chr19:g.746643C>T
chr5:g.94688594G>A
chr1:g.21850441C>T
chr4:g.121760325G>T
chr20:g.59944985G>A
chrX:g.48683951A>G
chr16:g.376671G>A
chr9:g.121190679G>A
chr10:g.104005597C>T
chr3:g.113379440A>G
chr2:g.74368789C>T
chr2:g.73239716G>A
chr1:g.174241515C>T
chr9:g.13150670_13150671insTTTATTTATTTA
chr18:g.63782451A>T
chr5:g.109378730T>C
chrX:g.105740629A>G
chrX:g.139956422C>T
chr2:g.213375022G>A
chr2:g.196897132T>C
chr11:g.118262959C>T
chr3:g.42915260C>T
chr19:g.56524951G>A
chr19:g.42291456_42291457insC
chr19:g.8965857A>G
chr6:g.43505166C>T
chr1:g.152313679C>T
chr2:g.218437249G>T
chr11:g.6390584G>C
chr20:g.50620086_50620087insTTTTGCAGG
chr2:g.48708974G>A
chr10:g.24520161C>A
chr2:g.218134912C>T
chr3:g.160677355G>A
chr19:g.57642286A>G
chr20:g.20199825C>T
chr17:g.49156595G>A
chr16:g.31078780C>T
chr18:g.79451710G>T
chr2:g.173266422C>A
chr4:g.10443677A>C
chr10:g.99704485T>C
chr11:g.5698539_5698540insACTCTCATTT
chr17:g.41845547T>C
chr12:g.52608369G>A
chr15:g.92120565_92120566insT
chrX:g.73844024G>A
chr14:g.94062579G>A
chr19:g.37363326A>T
chr2:g.178568673G>A
chr5:g.194979C>T
chr7:g.23832324T>A
chr16:g.16052739G>A
chr19:g.33811353C>T
chr7:g.113882113C>A
chr10:g.24620184G>A
chr2:g.30944881G>A
chr2:g.173955142G>T
chr16:g.4443048G>A
chr4:g.98891317A>C
chr17:g.7327749G>A
chr1:g.197357112_197357113insATGCGTCCATATTGTT
chr17:g.81103907C>T
chr1:g.153419246delCATAG
chr3:g.31596838G>A
chr20:g.25510680C>T
chr16:g.21019759C>T
chr10:g.26300876G>A
chr7:g.103491953C>T
chr11:g.60542657C>T
chr2:g.65018164C>T
chr5:g.115992226A>G
chr12:g.85057130C>A
chr4:g.163129259G>A
chr5:g.141490116C>T
chr14:g.20472546_20472547insGCATCAC
chr11:g.68980866C>T
chr6:g.167875413G>T
chr9:g.136431909G>A
chr3:g.44838304T>C
chr19:g.40717507A>C
chr11:g.113231733_113231734insCCCTCT
chr4:g.95301747G>A
chr8:g.143721339C>T
chr19:g.42292433A>C
chr19:g.831737G>A
chr9:g.113318510T>A
chr11:g.57327486C>A
chr10:g.128111768A>G
chr14:g.64766643C>A
chrX:g.136030137G>C
chr6:g.100393755G>A
chr11:g.55268348A>G
chr7:g.754787C>T
chr1:g.16976896C>A
chr17:g.62801649A>G
chr12:g.31982563G>T
chr17:g.17126769G>A
chr7:g.51029356C>T
chrX:g.19350000G>C
chr4:g.20713539C>T
chr16:g.46710756T>G
chr3:g.170384634C>T
chr2:g.135812373T>A
chr22:g.40779126C>T
chr2:g.240459172G>T
chr3:g.120402830G>A
chr1:g.151067590C>G
chr22:g.16697810G>A
chr19:g.17330352C>T
chr10:g.43387443C>T
chrX:g.73843167G>T
chr5:g.157138826T>C
chr1:g.32770101C>T
chr6:g.150733964T>C
chr17:g.58197143G>A
chr12:g.71583842C>A
chr8:g.123105398T>C
chr11:g.59457121G>A
chr15:g.83988746C>T
chr12:g.6438582C>T
chr2:g.233462695G>A
chr1:g.154449966C>T
chrX:g.118618722G>A
chr2:g.10426753G>T
chr5:g.40681016C>T
chr11:g.1247919C>T
chr17:g.21415430G>A
chr12:g.52519016C>T
chr17:g.32207006G>A
chr19:g.49884521G>C
chr11:g.94467820C>T
chr4:g.99949572A>G
chr3:g.179242948G>A
chr1:g.39957204C>A
chr9:g.122800951G>A
chr2:g.233682111C>T
chrX:g.40073768C>T
chr1:g.36287089C>G
chr17:g.59912731A>G
chrX:g.133026467C>G
chr6:g.52033078A>T
chr16:g.22123634C>T
chr16:g.66940336G>A
chr1:g.201143871G>C
chr16:g.20623394C>T
chr4:g.137530854T>C
chrX:g.135906475C>T
chr15:g.24679323T>A
chr5:g.154053352C>A
chr3:g.20174295T>A
chr13:g.28018466C>T
chr20:g.25453474C>T
chr5:g.147640717T>C
chr9:g.133417649A>C
chr2:g.112019513G>A
chr3:g.124334282A>C
chr16:g.29977789G>A
chr8:g.29191050G>A
chr8:g.36836804A>G
chr11:g.56701235T>G
chr5:g.132595022T>A
chr1:g.42759278G>T
chr16:g.30986910T>G
chr3:g.131228540A>G
chr1:g.52657002T>C
chr7:g.101033434C>T
chr16:g.798693G>A
chr17:g.42185378T>A
chr4:g.67590934C>A
chrX:g.65727871A>G
chr12:g.114355613G>A
chr6:g.155129973C>T
chr2:g.27582040G>A
chr22:g.19377922C>G
chr13:g.20003069C>A
chr3:g.75664337C>A
chr7:g.152220634T>G
chr9:g.105773977G>T
chrX:g.103707508C>A
chr17:g.82095408G>A
chr4:g.3238918C>A
chr16:g.30669424G>A
chr11:g.65851070delTTT
chr20:g.5946521G>A
chr12:g.48825664T>C
chr6:g.109506426C>G
chr17:g.78874056_78874057insATC
chr3:g.56737277G>A
chr2:g.206304912G>A
chr12:g.85980280C>T
chr1:g.181739225G>A
chr16:g.28979222C>T
chr11:g.66475852C>T
chr12:g.27400772A>T
chr6:g.55760457C>A
chr8:g.116771745A>G
chr8:g.67086097G>A
chrX:g.104166714G>A
chr12:g.109451648C>T
chr22:g.41387656G>A
[truncated: 8,000 more rows]

## Sheet: LUSC
chr17:g.7675139C>A
chr3:g.179218303G>A
chr3:g.179218294G>A
chr17:g.7675143C>A
chr17:g.7675994C>A
chr17:g.7673802C>A
chr17:g.7674230C>A
chr2:g.177234082C>G
chr17:g.7675124T>C
chr17:g.7674262T>C
chr3:g.192798931G>C
chr17:g.7673728C>A
chr2:g.177234217G>C
chr13:g.73075767G>C
chr2:g.177234232C>G
chr17:g.7673776G>A
chr2:g.177234232C>T
chr3:g.179234297A>G
chr2:g.177234225C>G
chr17:g.7674238C>A
chr2:g.177234216C>G
chr17:g.7674229C>A
chr10:g.45827364T>G
chr2:g.177234216C>T
chr17:g.7674221G>A
chr16:g.29485611C>G
chr9:g.21971030C>T
chr12:g.49018833C>T
chr17:g.7673788G>C
chr1:g.145578886T>C
chr17:g.7675089G>C
chr17:g.7674872T>C
chr10:g.87957951C>T
chr17:g.7674220C>T
chr17:g.7675088C>T
chr12:g.52515240_52515241insAGATGTTGACTGGTCCAACTCCTTCTCCACTGAGT
chr9:g.21971037C>A
chr17:g.7674890T>C
chr2:g.177234231T>C
chr2:g.177234229G>A
chr17:g.7674921C>A
chr9:g.21974731C>A
chr8:g.17753987G>C
chr17:g.7674256T>C
chr5:g.87389484C>G
chr6:g.56605225C>G
chr22:g.41169525G>A
chr4:g.145137362delT
chr10:g.94402613G>A
chr2:g.66568967delT
chr7:g.100489429delG
chr17:g.7675085C>A
chr2:g.224503073C>T
chr17:g.7675077G>A
chr17:g.7674220C>A
chr9:g.21971109C>T
chr17:g.7674216C>A
chr10:g.87933145G>A
chr15:g.101759755C>G
chr17:g.7675151C>A
chr9:g.21971121G>A
chr1:g.59674073C>G
chr3:g.185152807G>A
chr17:g.7673610T>C
chr4:g.1801841C>G
chr17:g.7673802C>T
chr17:g.7675149T>G
chr17:g.7675136G>A
chr17:g.7675076T>C
chr11:g.55820441C>A
chr17:g.7673788G>A
chr2:g.177234232C>A
chr17:g.7674962G>A
chr17:g.7673707T>A
chr11:g.534285C>A
chr9:g.128714362C>T
chr2:g.166036223C>A
chrX:g.145255884C>A
chr17:g.7670664C>A
chr19:g.22193019G>T
chr11:g.55886134delA
chr1:g.74041680G>T
chr22:g.35067092G>T
chr11:g.122957406A>T
chr1:g.218434141G>C
chr21:g.10473353G>A
chr17:g.53824224G>T
chr21:g.40347718G>A
chr1:g.158677737G>A
chrX:g.153183174A>G
chr10:g.17390599C>A
chr17:g.7673787G>C
chr17:g.15259139A>G
chr1:g.237496680G>A
chr15:g.83991120C>T
chr2:g.215431884C>G
chr17:g.4181257C>A
chr11:g.89993892G>A
chr7:g.57468982G>C
chr1:g.176046302C>T
chr15:g.58633203C>A
chr17:g.7676096C>T
chr17:g.7675151delC
chr3:g.185619445C>G
chr14:g.41891936C>A
chr5:g.87332563C>G
chr7:g.1482541C>A
chr5:g.24487909G>T
chr19:g.10489741C>A
chr1:g.47219858G>T
chr11:g.66316286C>A
chr22:g.41758452G>A
chr8:g.87873533C>A
chr19:g.12689780C>A
chr9:g.35793039G>T
chr17:g.7674894G>A
chr1:g.248203588T>C
chr15:g.25065041C>A
chr2:g.151553978G>A
chr19:g.9418562G>C
chr17:g.7674188C>A
chr19:g.10491943C>T
chr4:g.88463540G>T
chr8:g.144506785G>A
chr1:g.248061137G>T
chr14:g.46651304C>T
chr3:g.195781303G>T
chr8:g.54629194C>T
chr15:g.27990642C>T
chr11:g.56346706C>T
chr9:g.21971097C>A
chr1:g.167126550G>T
chr11:g.4848733C>T
chr5:g.1210475G>A
chr7:g.140126756C>G
chr11:g.59457015C>A
chr7:g.72278764C>A
chr19:g.35849273C>T
chr3:g.165189648G>T
chr6:g.134966365G>A
chr2:g.71073462G>T
chr6:g.132757548T>A
chr3:g.94003861G>T
chr18:g.8609901G>C
chr5:g.35871213G>T
chr20:g.59192359C>A
chr17:g.7675052C>A
chr5:g.45262454C>A
chr10:g.45648535C>A
chr2:g.89117770C>G
chr12:g.75051042C>A
chr2:g.130763224C>T
chr8:g.117172558G>A
chr4:g.177439636T>C
chr19:g.2988033G>A
chr7:g.148787094G>A
chr2:g.177234078G>T
chr6:g.83918028A>G
chr16:g.82098289G>A
chr12:g.52792245C>A
chr16:g.3738617G>A
chr6:g.32053577C>T
chr15:g.26567627C>A
chr14:g.19424175G>T
chr1:g.62819241C>G
chr21:g.10413661G>T
chr12:g.56128574C>T
chrX:g.143884481G>A
chr5:g.35860930C>T
chr17:g.50188551C>G
chr20:g.21707042C>A
chr3:g.98799639C>A
chr2:g.89040387C>A
chr1:g.248348888G>T
chr11:g.67611922G>A
chr2:g.79158414C>A
chr11:g.5132197C>A
chr1:g.176769626G>C
chr11:g.55572462T>A
chr7:g.53035724C>T
chr6:g.136613235C>T
chr1:g.215650746G>T
chr1:g.153990781C>T
chr11:g.61904795G>C
chr8:g.88167812G>T
chr5:g.24487970C>A
chr1:g.248272974G>T
chr21:g.10605519G>A
chr4:g.61948187C>G
chr1:g.248388448C>A
chrX:g.123733007C>G
chr11:g.123940062G>T
chr17:g.7670699C>A
chr11:g.1629932G>T
chrX:g.74743523C>A
chr1:g.218307569G>T
chr1:g.88982914C>A
chr7:g.55191831T>A
chr6:g.132779394T>A
chr7:g.89336838C>A
chr2:g.178547980C>T
chr3:g.139020483A>G
chr15:g.49155659C>T
chr13:g.19179540C>A
chr17:g.7676176T>A
chr3:g.114237193C>A
chr3:g.1220705G>A
chr1:g.248388457C>T
chr17:g.7675085C>T
chr10:g.94132282G>T
chr19:g.55733338C>T
chr3:g.179218303G>C
chr17:g.59210042G>T
chr12:g.120162030G>A
chr10:g.121488000C>G
chrX:g.91436004G>T
chr17:g.7674953T>A
chr4:g.115076081C>A
chr2:g.219247621G>T
chr1:g.149913439C>A
chr16:g.1764157G>T
chr17:g.7673784C>T
chr2:g.90100608C>G
chrX:g.27747659G>T
chr13:g.83880244G>C
chr10:g.119827490C>G
chr14:g.101026797G>T
chr5:g.33937379G>T
chr16:g.67227125G>A
chr19:g.1221315delC
chr17:g.7676153delG
chr19:g.56816911C>A
chr16:g.24361847G>C
chr16:g.74360649G>A
chr9:g.22451418G>T
chr14:g.105625063T>C
chr1:g.247588938G>T
chr21:g.21432269C>A
chr1:g.247451583G>A
chr5:g.45262618C>A
chr11:g.57699097C>T
chr3:g.93980376G>T
chr19:g.1251881G>C
chr16:g.61825099C>A
chr12:g.112870012G>T
chr19:g.44428573G>A
chr2:g.177234076C>T
chr2:g.178531637G>A
chr1:g.149813631C>T
chr7:g.127615327G>T
chr7:g.135587993G>A
chr14:g.20243307C>A
chr5:g.22078724C>G
chr12:g.8838416C>T
chr2:g.6996946G>T
chr15:g.65930943C>T
chr20:g.47663467G>A
chr19:g.51627189C>A
chr19:g.41807332G>A
chr10:g.43111328C>T
chr1:g.152310480C>T
chr3:g.120646362C>A
chr6:g.69339373G>T
chr5:g.140821878C>A
chr14:g.92685134C>A
chr9:g.21971066T>G
chr8:g.54625767G>T
chr14:g.19433961C>A
chr8:g.112645138G>T
chr17:g.7673823C>A
chr11:g.55773758C>A
chr14:g.18601847C>T
chr14:g.67199753G>T
chr21:g.40013232C>T
chr11:g.87321270C>T
chr15:g.50529832G>A
chr11:g.90178041G>A
chr17:g.7674953T>C
chr19:g.8731768T>C
chr1:g.247451954C>A
chr4:g.13337649C>A
chr1:g.175097674G>T
chr19:g.31278136C>T
chr1:g.13053512A>G
chr6:g.68639197G>T
chr19:g.14619386A>T
chr11:g.55796272C>A
chr10:g.87933245_87933246insA
chr1:g.62038035C>G
chr5:g.1421900C>T
chr2:g.140323976C>G
chr2:g.72133077C>A
chr2:g.1209218C>T
chr2:g.48595365A>C
chr16:g.72795454T>C
chr11:g.56030487C>A
chr10:g.17798670G>T
chr17:g.82870331C>T
chr8:g.115620007C>A
chr7:g.154892533G>A
chr3:g.179234297A>T
chr1:g.244856851T>A
chr3:g.152340406A>G
chr3:g.4766677G>C
chr9:g.133360045C>T
chr3:g.125002003G>A
chr6:g.162262738C>A
chr19:g.55175753G>A
chrX:g.149716475C>A
chr1:g.219996987G>A
chr16:g.49638292G>T
chr11:g.49982020G>C
chr11:g.89850589_89850590insAACTTG
chrX:g.102141081G>T
chr8:g.112689952G>T
chr1:g.21850139C>T
chr8:g.124450814C>T
chr3:g.179221146G>A
chr6:g.32195756C>G
chr5:g.24498498C>T
chr19:g.40218127G>A
chr19:g.4219750G>A
chr10:g.106652510C>A
chr14:g.46651727G>T
chrX:g.120379470C>A
chr7:g.29367972C>G
chr18:g.35041667G>A
chr10:g.100042434G>T
chr8:g.26770283G>T
chr15:g.62753785G>T
chr1:g.248061104G>T
chr5:g.35776274C>T
chr6:g.170288402C>T
chr20:g.63521587delCAGGTGAGTGCAGGATCGCCCCTTTCTCCCCCCGCTCCTCCAGGAGCTGGCAGCATCAAGACCCCACTTCGCTTCTCT
chr8:g.116856282C>A
chr18:g.74556335C>T
chr1:g.169594865G>T
chr17:g.7670708C>A
chr19:g.10489771G>A
chr1:g.248323877C>A
chr17:g.7674972C>A
chr11:g.67998439C>A
chr6:g.65405339A>T
chr7:g.5527863G>A
chr1:g.234433460G>C
chr11:g.30909060A>G
chr19:g.19227991G>T
chr19:g.54773365C>A
chr1:g.248038739C>T
chr3:g.126420147C>A
chr12:g.101048400G>C
chr8:g.25439321G>A
chr2:g.241229689_241229690insTCTCACTGCTGCTGGCGGTCCAGG
chr1:g.16649492C>G
chr6:g.75105214C>A
chr4:g.186603642delT
chr2:g.89040695C>A
chr2:g.124647943C>A
chr1:g.247860686G>T
chr11:g.119156963G>A
chr15:g.38698397G>T
chr14:g.18601236C>A
chr8:g.138152533G>T
chr1:g.20650505G>A
chr7:g.6330916C>A
chr10:g.37149781C>A
chr13:g.91728551G>T
chr12:g.52385193G>A
chr10:g.38118568G>T
chr2:g.189051445C>A
chr7:g.72862826delC
chr3:g.130376572C>T
chr10:g.132117212C>T
chr15:g.88843505C>T
chr17:g.7676056C>A
chr17:g.7675076T>A
chr14:g.105352458delCTC
chr22:g.22307113T>G
chr9:g.66976873C>T
chr1:g.219915481C>A
chr3:g.112548602C>T
chr10:g.79557510T>A
chr9:g.119213898G>T
chr9:g.99833656C>T
chr4:g.176131700G>T
chr4:g.523555G>A
chr3:g.12258155C>T
chr3:g.185428893G>T
chr1:g.76628843G>A
chr14:g.21415829C>T
chr9:g.35737409G>A
chr17:g.7676177delG
chr17:g.48529654G>T
chr1:g.114713908T>C
chr16:g.84237363G>T
chr14:g.100149106G>A
chr19:g.22634473C>G
chr5:g.109781581C>T
chr3:g.96987843T>A
chr8:g.123977501C>T
chr11:g.90134744G>T
chr18:g.25062684C>A
chr7:g.98848225G>A
chr3:g.98470399G>A
chr3:g.98133408C>A
chr7:g.101549200delC
chr1:g.36092425G>T
chr4:g.61892666C>A
chr9:g.21971001C>A
chr10:g.37162674C>A
chr14:g.62950244C>A
chr19:g.53165268C>T
chr16:g.19555730A>G
chr11:g.70487002C>T
chr5:g.41018745C>T
chr1:g.56954824C>A
chr1:g.74573429G>T
chr6:g.76002935G>T
chr5:g.141340446C>T
chr19:g.50415453G>T
chr7:g.31816110C>A
chr2:g.61214440C>G
chr3:g.126103818C>A
chr5:g.33534880G>T
chr9:g.21971187G>A
chr1:g.152309346G>A
chr3:g.141147237C>T
chr12:g.7729702C>A
chr17:g.7674216C>G
chr1:g.120833687T>C
chr1:g.153818903C>A
chr4:g.133151778G>T
chr6:g.65789142G>T
chr13:g.71559819C>T
chr3:g.197980371G>T
chr8:g.120693877C>T
chr6:g.69676506G>A
chr1:g.158939111G>C
chr12:g.99655109C>A
chr2:g.210612271C>A
chr15:g.23566591G>T
chr14:g.71588187C>G
chr12:g.49040865delG
chr9:g.119167962G>T
chr1:g.248100168C>T
chr14:g.19827812C>A
chr17:g.7673835C>A
chr1:g.99719567C>A
chr17:g.7673820C>G
chr1:g.181733002G>A
chr5:g.33984294G>C
chr19:g.39872126G>C
chr8:g.99854198G>A
chr17:g.7675064G>C
chr1:g.247949417C>A
chrX:g.30560092G>T
chr11:g.119003341delT
chr1:g.247424736C>T
chr12:g.123826776C>G
chr5:g.78294478G>A
chr17:g.7674232C>T
chr3:g.167315753C>T
chr2:g.90022079C>T
chr7:g.26197341C>G
chr8:g.112335352C>A
chr14:g.101033802C>T
chr4:g.68064879C>T
chr19:g.58068291G>A
chr2:g.169504855G>T
chr1:g.156048638G>C
chr17:g.7673704G>A
chr7:g.31809093C>A
chr1:g.190226274G>T
chr19:g.51501503G>T
chr1:g.56917574C>A
chr16:g.35477936C>A
chr8:g.138195276C>A
chr12:g.41563555G>T
chr12:g.54962518G>C
chr17:g.7673740C>A
chr6:g.101859341C>T
chr6:g.47009647G>A
chr6:g.127514867C>G
chr12:g.94224259C>T
chr3:g.186572097G>A
chr10:g.106652468G>T
chr7:g.155302371C>G
chr1:g.12353979G>T
chr8:g.1549353C>A
chr5:g.40999702G>T
chr2:g.137056497G>T
chr3:g.178807389C>A
chr11:g.56346067C>A
chr19:g.9214046C>A
chr15:g.23645619C>A
chr1:g.158661310C>T
chr1:g.176595545C>A
chr5:g.136356827G>A
chr17:g.7673610T>A
chr22:g.40681576C>T
chr19:g.17658201G>A
chr15:g.25180438G>T
chr19:g.694935C>G
chr12:g.57471453C>G
chr17:g.7674233C>T
chr21:g.10649424G>T
chr19:g.10499571C>A
chr2:g.156325836C>A
chr1:g.110897820G>A
chr11:g.6877369C>A
chr20:g.59939349C>A
chr1:g.216246727C>G
chr14:g.94448326C>G
chr8:g.143921019C>A
chr7:g.73243946G>A
chr19:g.21974456C>G
chr12:g.8605251G>C
chr15:g.86256973G>T
chr19:g.10499630C>T
chr11:g.58422474C>A
chr17:g.20502471A>G
chr5:g.141122235G>T
chr6:g.165280073C>T
chr15:g.25208119G>T
chr5:g.181198213G>T
chr3:g.47088124C>A
chr9:g.135624303C>T
chr12:g.85301171G>T
chr18:g.53205308G>A
chr11:g.133920913C>T
chr11:g.99845218C>A
chr1:g.248038514G>A
chr20:g.2815794C>A
chr7:g.94425169C>T
chr2:g.162174940C>A
chr7:g.74238937C>G
chr19:g.56191960C>G
chr17:g.7674218T>C
chr7:g.57126593C>A
chr17:g.7674291C>T
chr1:g.75211539C>A
chr6:g.105158526G>T
chr8:g.76704653C>A
chr18:g.47033707G>T
chr19:g.8698138G>A
chr7:g.100861873G>T
chr1:g.162755249G>T
chr10:g.27398261G>T
chr19:g.58471416C>T
chr3:g.377874G>T
chr8:g.112517166C>T
chr6:g.49611023C>T
chr1:g.77632870C>T
chr17:g.7674292T>C
chr11:g.56137240G>A
chr5:g.633869G>A
chr11:g.56318599C>A
chr5:g.40999765C>A
chr20:g.53256363C>G
chr2:g.89040334G>T
chr2:g.178568814G>A
chr5:g.141101978C>A
chr8:g.112224789C>A
chr11:g.56252406G>T
chr12:g.91104253C>A
chr21:g.10592365C>A
chr15:g.78490660T>C
chr12:g.39357345A>T
chr7:g.73570880C>A
chr3:g.165188045G>T
chrX:g.73852006C>A
chr16:g.72959617C>T
chr1:g.16633138C>A
chr3:g.57198801C>T
chr8:g.112406599C>A
chr6:g.78941113G>C
chr19:g.3778994C>A
chr7:g.54549881C>T
chr8:g.12129212A>G
chr5:g.19473472G>T
chr19:g.38577951G>A
chr8:g.142914775G>T
chr11:g.49982403G>T
chr10:g.37152081C>A
chr6:g.160548558C>T
chr14:g.19827502C>T
chr3:g.119146870C>A
chr10:g.37132239G>T
chr6:g.26205010C>T
chr20:g.58651925C>A
chr15:g.52272721G>A
chr1:g.179639922G>A
chrX:g.124420481C>A
chr1:g.156876483C>T
chrX:g.92618758G>T
chr6:g.26031841C>T
chr9:g.21971109C>A
chr6:g.50009176C>A
chr3:g.69181051C>A
chr6:g.51619069C>A
chr10:g.89645249C>G
chr1:g.31756056C>T
chr4:g.51995648G>C
chr2:g.118843015G>T
chrX:g.73823055delT
chr17:g.7675993C>A
chr8:g.103435756A>G
chr5:g.24491788T>C
chr2:g.89948088G>T
chr3:g.44446537C>A
chr1:g.22520173G>T
chr9:g.21971112G>A
chr3:g.17011122G>T
chr12:g.72031696T>A
chr11:g.92836696G>T
chr18:g.44953178G>T
chr17:g.7673772C>G
chr19:g.10489239C>T
chr14:g.58448398C>T
chr12:g.78050810G>T
chr2:g.178741819G>T
chr3:g.49715687C>T
chr4:g.188099035C>A
chr1:g.197057350C>T
chr8:g.104249539C>T
chr18:g.13885082C>T
chr1:g.201052606G>T
chr3:g.112947912G>A
chr1:g.248650036G>T
chr17:g.53823440C>A
chr15:g.19987959C>A
chr17:g.7673809C>T
chr4:g.152326137G>C
chr8:g.105802174C>A
chr15:g.20452402C>A
chr11:g.58358439C>G
chr21:g.33551954C>T
chr17:g.7676267delG
chr16:g.67660295G>A
chr19:g.55593220C>A
chr17:g.4539347A>T
chrX:g.85271007G>A
chr9:g.21971018G>A
chr11:g.102721653G>T
chrX:g.35989423G>T
chr2:g.90082863G>C
chr16:g.34163077G>C
chr17:g.7676153G>A
chr5:g.78294488G>A
chr9:g.39149962C>A
chr1:g.248362467C>A
chr4:g.166057257G>T
chr8:g.109444967T>A
chrX:g.53250739C>A
chr8:g.47279912A>G
chrX:g.1288878C>T
chr14:g.19780991C>A
chr10:g.70117868G>A
chr5:g.132575822C>T
chr3:g.165069105C>A
chr2:g.178730576C>A
chr19:g.54207560C>T
chr11:g.56093867C>A
chr1:g.240930766G>T
chr1:g.247990783C>A
chr5:g.34811806C>T
chr9:g.123034531G>A
chr20:g.16379637C>T
chr16:g.28486408C>T
chr6:g.83940552G>T
chr5:g.21975249G>A
chr6:g.132723004G>A
chr1:g.169378359delG
chr10:g.121498556C>T
chr19:g.55907909G>T
chr1:g.74041347C>A
chr1:g.152308035G>T
chrX:g.84468915C>A
chr1:g.43620144G>A
chr3:g.197027890G>A
chr14:g.18601642G>T
chr1:g.175362712G>T
chr2:g.90210439T>A
chr17:g.7674870C>A
chr17:g.7673802C>G
chr19:g.45825171C>A
chr17:g.7895068G>T
chr1:g.209782875C>T
chr1:g.248574269C>T
chr3:g.119726224G>T
chr11:g.534286C>A
chr19:g.37389410G>T
chr5:g.45303721C>A
chr1:g.113838168T>C
chr12:g.130436878G>T
chrX:g.54930708C>A
chr2:g.48646763G>T
chr14:g.88185750C>A
chr19:g.56815409G>T
chr17:g.30248950G>A
chr11:g.90202817C>A
chr2:g.182264411T>C
chr8:g.87873540C>G
chr11:g.58267151G>C
chr14:g.19433938C>A
chr6:g.150022122C>G
chr2:g.130762966C>A
chr21:g.10605509G>T
chr1:g.75919001G>A
chr17:g.41097785G>A
chr3:g.49375451C>T
chr2:g.178372234G>T
chr17:g.74351002G>C
chr1:g.240207562G>A
chr18:g.580660C>T
chr12:g.120064691G>T
chr2:g.229407292C>G
chr7:g.142301018C>A
chrX:g.299311C>G
chr12:g.40936905G>T
chr5:g.157162572C>A
chr7:g.126533686G>T
chr12:g.1083574G>A
chr19:g.55732449C>G
chrX:g.34131165C>A
chr15:g.84895089C>T
chr20:g.10622691C>G
chr16:g.4821571C>T
chr1:g.152699133C>T
chr19:g.55911833C>G
chr16:g.85914509C>A
chr14:g.75047057C>G
chr2:g.224401536C>T
chr3:g.126343735C>T
chr3:g.118902538C>A
chr8:g.3369254C>T
chr2:g.30776020C>A
chr15:g.23645232G>A
chrX:g.141003593C>A
chr8:g.138151549G>T
chr6:g.26251879G>A
chr12:g.6095295C>T
chr19:g.43967303G>A
chr14:g.55671657T>A
chr11:g.5422417C>A
chr11:g.14831639G>T
chr7:g.100582428G>C
chr11:g.62525642G>C
chr10:g.17910395C>A
chr18:g.12351163G>A
chr7:g.100857118G>T
chr1:g.237674181C>G
chr12:g.119179562G>A
chr1:g.204618424C>T
chr6:g.50043770A>T
chr11:g.59211370G>T
chr12:g.43428767G>T
chr17:g.7675220T>A
chr3:g.138714666G>A
chr16:g.5011151delC
chr7:g.123876888C>T
chr8:g.95263746C>G
chr3:g.138471007C>T
chr11:g.85684957C>T
chr5:g.151134483C>T
chr7:g.138107506C>T
chr1:g.248574076G>T
chr7:g.103575691C>G
chr7:g.106868132C>A
chr10:g.54346485C>T
chr17:g.7676055C>A
chr10:g.25597856C>T
chr5:g.141225196C>A
chr10:g.121538601C>A
chr8:g.138132573G>T
chr4:g.186619237G>C
chr16:g.76462091C>A
chrX:g.1601286G>T
chr5:g.169803198C>A
chr11:g.101062555C>A
chrX:g.53547714G>T
chr1:g.209432167C>T
chr1:g.196258384A>G
chr10:g.54153281C>A
chr9:g.98087947G>C
chr4:g.8227529G>A
chr19:g.12133357G>A
chr5:g.140808469C>T
chr13:g.108209210C>A
chr20:g.48651411G>A
chr9:g.116207547G>C
chr5:g.140796689C>A
chr2:g.165370229A>G
chr2:g.222927138G>T
chr19:g.21383046A>G
chr19:g.58599081A>G
chr14:g.104942716C>G
chr7:g.143027051C>T
chr14:g.19876564C>A
chr1:g.211578430G>A
chr18:g.78994397G>A
chr5:g.45262057G>C
chr5:g.90684114G>C
chr2:g.1484722G>A
chr17:g.7674859C>T
chr19:g.53729858G>T
chr4:g.70606283C>T
chr7:g.148229701C>T
chr11:g.1622049C>T
chr21:g.10569712G>A
chr2:g.25743095G>A
chr17:g.7673809C>A
chr13:g.32340456G>A
chr8:g.144807810C>G
chr2:g.178665435G>A
chr5:g.86286919G>T
chrX:g.153868432G>T
chr3:g.88140344C>G
chr12:g.52515240_52515241insAGATGTTGACTGGTCCAACTCCTTCTCCA
chr8:g.42732110C>T
chr12:g.49034129C>T
chr1:g.154601792T>C
chr12:g.52518162_52518163insCTTGTTCTTGAAGTCTTCCACCAGGT
chr2:g.140373054G>T
chr22:g.15690483G>T
chr15:g.25199264G>T
chr22:g.16962826C>T
chr5:g.150231314T>A
chr17:g.7895069C>G
chr7:g.143294739A>G
chr12:g.80717466C>T
chr1:g.26773584G>T
chr16:g.24361502C>T
chrX:g.38102412G>A
chr2:g.232545570C>A
chr1:g.149932300G>A
chr1:g.236142922C>G
chr9:g.42187238C>A
chr1:g.75156915C>G
chr19:g.19197546C>T
chr4:g.70055573C>G
chr18:g.14542892G>A
chr13:g.19451202C>T
chr2:g.74255794C>T
chr2:g.43225086C>T
chr1:g.74182790A>G
chr19:g.57134890delC
chr6:g.6167596G>C
chr22:g.50000812G>A
chr5:g.31464235C>A
chr10:g.133391346G>A
chr1:g.165417210G>T
chr3:g.150972696G>C
chr18:g.3135625G>A
chr3:g.196707832C>G
chr3:g.98799601G>T
chr5:g.24505143C>A
chr1:g.13281799G>T
chr22:g.36285782delCTGCGGGGTGGGCGGGAGAAGTGAGGGGCCTACCCTGGGGACACACCTGGTCCCCCCCAACTCTGCCCCCTCACTCAGCTCAC
chr15:g.57955269C>A
chr1:g.74439622G>T
chr11:g.124030034C>T
chr2:g.176152997G>T
chr6:g.26204857G>A
chr12:g.43432405G>T
chr1:g.237784342C>A
chr8:g.88041733C>A
chr10:g.16925597C>A
chr1:g.237784241G>T
chr6:g.69049302C>T
chr1:g.12283341C>T
chr6:g.29607177G>A
chr6:g.31642213G>A
chr9:g.21974749C>A
chr1:g.18691907G>T
chr1:g.17228794G>T
chr19:g.42375778G>T
chrX:g.154365152G>C
chr2:g.48595364_48595365insTCTT
chr12:g.78118121G>T
chr16:g.24862609G>A
chr17:g.7673802delC
chr15:g.33696291G>T
chr2:g.240771048G>A
chr9:g.21971108T>C
chr12:g.103683282C>A
chr10:g.48420202G>C
chr11:g.55554901G>T
chr2:g.130074827C>A
chr7:g.150628017C>T
chr4:g.65377005G>T
chr5:g.151567149G>A
chr19:g.32658951G>A
chr11:g.107348978C>T
chr12:g.45928902T>C
chr7:g.155711236C>G
chr15:g.48152148delT
chr19:g.53383576G>A
chr11:g.4946731T>C
chr18:g.63723435G>C
chr12:g.122481595C>G
chr17:g.5139043G>C
chr6:g.5999197C>G
chr16:g.28959052G>T
chr3:g.197701857C>G
chr19:g.7542783A>T
chr15:g.45094948C>A
chr13:g.32775166G>A
chr15:g.80131194A>G
chr7:g.41972501G>A
chr2:g.86045770C>T
chr7:g.7432699C>T
chr17:g.4672580G>C
chr12:g.80329104G>C
chr1:g.237732149G>T
chr7:g.142094624G>A
chr12:g.49657159T>A
chr11:g.94496888G>T
chr20:g.47652438C>T
chr9:g.32431750G>C
chr14:g.23386089C>A
chr15:g.25726080G>T
chr7:g.111994153C>A
chr5:g.138165130C>G
chr19:g.41892329A>C
chr15:g.75955964A>T
chr22:g.41527874G>A
chr7:g.117190864G>A
chr12:g.6914099G>C
chr2:g.48963575G>A
chr12:g.102182549G>T
chr8:g.143927550C>A
chr6:g.33286883A>G
chr16:g.66400999G>A
chr1:g.86125412C>G
chr20:g.25476789C>A
chr1:g.118185097_118185098insG
chr15:g.25370571C>A
chr17:g.14192100G>T
chr19:g.41719931G>A
chr11:g.74844200G>C
chr1:g.176882881G>T
chr14:g.21400230C>T
chr6:g.33680555G>C
chr17:g.63831167C>G
chr22:g.33604446C>A
chr1:g.237709068C>A
chr21:g.10649605T>A
chr12:g.110436631T>C
chr7:g.155071082G>T
chr20:g.59912383T>A
chr2:g.241264488C>T
chr5:g.83519691G>A
chr7:g.155084254C>A
chr7:g.130026234T>A
chr4:g.6861012C>T
chr12:g.18738487delT
chr12:g.31985200C>T
chr1:g.160818317G>C
chr4:g.41682381T>C
chr2:g.3196890C>G
chr11:g.133936157G>T
chr18:g.23837031A>T
chr14:g.24103216G>A
chr16:g.2281209G>T
chr1:g.158329857C>G
chr7:g.95987080T>A
chr1:g.182904222C>T
chr1:g.111761324G>T
chr19:g.53455618T>A
chr2:g.178589758G>A
chr5:g.169700027C>T
chr11:g.49952428G>T
chr7:g.2601465G>T
chr11:g.116820735G>C
chr3:g.57098419G>C
chrX:g.104250840C>T
chr19:g.21537096A>C
chr2:g.135753577C>T
chr16:g.30979762G>A
chr8:g.41932553G>T
chr7:g.42935073T>C
chr1:g.153986208T>C
chr2:g.178868054A>T
chr6:g.4952401A>T
chr16:g.14554064C>A
chr6:g.69324927G>T
chrX:g.103587316A>G
chr22:g.32190769G>T
chr2:g.21011907G>T
chr4:g.95840200C>A
chr2:g.46974971A>T
chr4:g.16024305T>C
chr13:g.37047887G>C
chr3:g.158102882G>A
chr17:g.68420196C>T
chr6:g.83934722G>T
chr5:g.7727248C>T
chr6:g.43007223C>T
chr3:g.30844408C>A
chrX:g.5903420T>A
chr11:g.118520001G>A
chr3:g.113965214C>T
chr12:g.9425777C>T
chr12:g.75391308G>T
chr7:g.7531615G>T
chr7:g.92671527C>A
chrX:g.47976283C>A
chr3:g.48379437T>C
chrX:g.47619396G>T
chr13:g.29026739G>A
chr3:g.191218922G>C
chr1:g.176946003G>C
chr11:g.558966G>T
chr15:g.20453653C>G
chr1:g.169514378T>A
chr10:g.53827486G>C
chr12:g.109185738G>A
chr12:g.104327668C>G
chr19:g.50440940C>T
chr19:g.12628577C>T
chr1:g.28862779C>A
chr6:g.28504461G>T
chr12:g.49490693G>C
chr12:g.21172765G>T
chr7:g.107689191T>C
chr2:g.39282521T>C
chr1:g.39358793G>A
chr19:g.22756457G>C
chr16:g.53245426C>T
chr6:g.43307679G>A
chr8:g.102278852C>T
chr8:g.6532330A>G
chr9:g.15177774C>A
chr20:g.45877501G>T
chr16:g.20543152A>G
chr8:g.36806281G>T
chr8:g.88041684C>T
chr12:g.7190411G>T
chr20:g.1557658G>T
chr19:g.42224917C>T
chr14:g.73261293T>C
chr16:g.29799264G>C
chr11:g.49952605G>A
chr18:g.7231417G>C
chr12:g.55247518C>A
chr19:g.41687128A>T
chr10:g.29555065G>C
chr14:g.24157629C>T
chr5:g.31323246G>T
chr20:g.41452776T>G
chr5:g.13865681C>A
chr11:g.76496440A>C
chr12:g.99648113C>A
chr4:g.145146310T>C
chr9:g.35382386T>G
chr20:g.62836332C>T
chr10:g.70757988C>T
chr3:g.62585296G>A
chr18:g.32287331G>C
chr19:g.8119015G>T
chr6:g.118275479G>T
chr2:g.140358907C>T
chr3:g.49099138A>G
chr1:g.70028264C>A
chr10:g.68885167T>A
chr12:g.1834521A>G
chr14:g.106606358C>T
chr19:g.12703463G>A
chr1:g.53930070C>A
chr4:g.88036218A>G
chr2:g.95927267T>C
chr3:g.147396161C>T
chr20:g.3669564C>A
chr7:g.151167133G>T
chr5:g.15936795G>T
chr1:g.40479290T>C
chr10:g.114218501A>G
chr1:g.178521169C>T
chr1:g.3494103C>A
chr14:g.95467958G>A
chr19:g.11948622G>T
chr17:g.10454722G>T
chr1:g.201870624G>T
chr3:g.128806493G>T
chr6:g.152098787T>C
chr3:g.12803515G>T
chr11:g.21573350C>T
chr7:g.21482093G>A
chr12:g.112184513C>G
chr7:g.88794814C>A
chr11:g.56743577C>T
chr16:g.31407867C>T
chr2:g.79909614C>G
chr2:g.119247827T>C
chr18:g.36116698C>T
chr1:g.53594526G>A
chr11:g.6002756G>C
chr5:g.56126943T>C
chr7:g.48520271C>T
chr11:g.61734875G>T
chr4:g.8582577G>C
chr6:g.154795046C>G
chr1:g.60041056G>A
chrX:g.45151599G>A
chr11:g.6451368C>T
chr7:g.71665471C>A
chr11:g.73296536C>T
chr12:g.42097953C>A
chr11:g.6795199G>T
chr3:g.33373674G>A
chr8:g.141466435G>A
chr17:g.7675156delC
chr20:g.45882959G>A
chr4:g.113357181G>C
chr2:g.241065575C>A
chr7:g.1499148C>G
chr10:g.114203404T>G
chr17:g.46171872G>A
chr20:g.35251908G>C
chr19:g.40800801C>T
chr16:g.30965010A>T
chr19:g.35754302G>C
chr2:g.197516116G>C
chr11:g.69071932C>T
chr15:g.22569261G>A
chr12:g.61720893C>G
chr1:g.42189335T>C
chr17:g.42979446T>A
chr1:g.98953102C>A
chr22:g.30615438T>C
chr2:g.218135177A>G
chr5:g.22078529delG
chr1:g.78655177G>T
chr1:g.248473843_248473844insC
chr2:g.241816521G>T
chr6:g.105161502A>T
chr22:g.22381138C>G
chr1:g.65605127G>A
chr11:g.4804171G>T
chr8:g.54629204C>A
chr1:g.154348440G>C
chr19:g.18086788G>C
chr11:g.46890398G>A
chr19:g.8978978T>A
chr5:g.163483162G>T
chr7:g.144374819A>G
chrX:g.77682066C>T
chr1:g.154054394C>G
chr15:g.42801728C>A
chr17:g.59677036A>G
chr4:g.186617707C>A
chr1:g.215741465A>G
chr12:g.66371768T>A
chr5:g.177096708G>A
chr19:g.17200792A>G
chr7:g.116526552G>A
chr1:g.229433046C>A
chr12:g.100510937G>T
chr1:g.54758541C>A
chr1:g.169520639G>T
chrX:g.131278127G>A
chr8:g.143721078G>A
chr3:g.38847285delA
chr15:g.87880373T>A
chr11:g.130405564G>A
chr19:g.43965001G>T
chr2:g.167247707G>T
chr5:g.7826960G>A
chr14:g.64753649C>T
chr8:g.18872129C>T
chr5:g.102399563G>T
chr16:g.84154652A>T
chr16:g.88678351delC
chr11:g.56176718T>G
chr12:g.125654294C>T
chr1:g.45035688C>T
chr18:g.48029761delGCAGAACTC
chr14:g.77429060C>A
chrX:g.153057510T>C
chr8:g.142330921C>T
chr15:g.63659841G>C
chr11:g.83965437delTGT
chr7:g.107563882G>A
chr7:g.147562181G>A
chr17:g.3862222C>A
chr8:g.102305254C>A
chr7:g.32976382T>G
chrX:g.131088811G>C
chr7:g.21615174C>G
chr19:g.10256730G>A
chr2:g.10441639C>G
chr3:g.112479636G>C
chr12:g.100503403C>T
chr2:g.131443760C>T
chr3:g.180603322C>G
chr12:g.125650834T>C
chr16:g.53844160G>C
chr8:g.87873070G>T
chr10:g.121898890T>C
chr12:g.105141179G>A
chr17:g.64860292G>A
chr18:g.58536559T>C
chr5:g.141178241C>T
chrX:g.15591856C>A
chr4:g.46250276C>T
chr8:g.144080104C>G
chr22:g.36938622G>T
chr11:g.59842450G>T
chr11:g.123906489C>G
chr12:g.55827392G>T
chr19:g.56814113G>C
chr22:g.32869098C>A
chr3:g.187235803C>A
chr17:g.30057795G>C
chr6:g.72250417delC
chr13:g.32370528G>A
chr16:g.10907861C>T
chr2:g.40429243T>C
chr17:g.31235947C>A
chr1:g.248099418G>T
chr6:g.116515783C>T
chr14:g.23424841G>A
chr1:g.28466553C>G
chr19:g.5219458C>G
chr3:g.99849422G>C
chr14:g.52708344G>A
chr1:g.150511715C>T
chr12:g.114679966C>T
chr2:g.30942277G>A
chr3:g.134558255G>T
chr10:g.15096862G>C
chrX:g.152759953C>A
chr19:g.21727805C>T
chr9:g.76503501G>A
chr15:g.25185442G>C
chr12:g.20370109G>A
chr1:g.203772074A>G
chr15:g.78478332T>C
chr11:g.55665441T>C
chr8:g.66677908C>T
chr1:g.240208029G>A
chr9:g.88535482G>C
chr8:g.112306018G>T
chr12:g.75050726C>G
chr8:g.138265824G>C
chr8:g.41940885G>C
chr11:g.48136053T>C
chr10:g.132405452C>T
chr18:g.57436769C>T
chr11:g.27350181G>C
chr16:g.71285635C>T
chr10:g.35529972G>T
chr11:g.85717529A>G
chr1:g.203169315C>A
chr3:g.9867097delGTCCTTCACTGGGG
chr4:g.112514998A>G
chr8:g.87873080delC
chr11:g.68908625G>A
chr11:g.134310680C>A
chr1:g.42162918A>G
chr3:g.151337962G>A
chr19:g.24087230C>A
chr21:g.44813943G>A
chr11:g.123939774C>T
chr17:g.69185476C>T
chr10:g.91848616C>T
chr6:g.16145000T>A
chr2:g.151656405G>A
chr5:g.41382333T>A
chr13:g.101598228C>A
chr19:g.4099224C>A
chr17:g.44777759G>A
chr17:g.17814870C>T
chr11:g.66283425G>A
chr14:g.31173285C>A
chr11:g.114064149G>T
chr5:g.55033853G>T
chr17:g.63536116C>T
chr19:g.33206692A>G
chr9:g.136407238G>C
chr14:g.33793901G>A
chr19:g.8952427G>A
chr11:g.57236636G>A
chr1:g.29311750C>G
chr2:g.233263228G>T
chr22:g.26465566C>A
chr14:g.53950796A>C
chr1:g.155085271G>T
chr7:g.55646686C>T
chrX:g.74740300G>T
chr1:g.248061125G>A
chr1:g.1390256G>A
chr6:g.166158461G>T
chr11:g.30952490C>T
chr5:g.156344555A>C
chr7:g.138861291C>T
chr17:g.44401057G>A
chr7:g.20699873T>A
chr6:g.129328373A>T
chr1:g.156908809C>T
chr11:g.32434788G>C
chr3:g.197512254C>T
chr12:g.10825524C>A
chr4:g.62070304C>T
chr10:g.102382175C>T
chr2:g.219451166G>T
chr6:g.130904499G>T
chr14:g.88429438G>C
chr6:g.43144451G>C
chr6:g.79513330A>C
chr8:g.104392809T>A
chrX:g.84468676C>T
chr8:g.68118551G>T
chr3:g.197703563C>G
chr14:g.73493160delA
chr12:g.26960650C>A
chr1:g.229432997G>T
chr6:g.97231464C>T
chr6:g.144479935G>T
chr17:g.34638144G>T
chr1:g.175097681C>G
chr1:g.150511073C>A
chrX:g.72196849G>T
chr17:g.39408638G>A
chr20:g.23084694G>T
chr1:g.248362087C>A
chr17:g.33291909C>T
chr2:g.143768015T>A
chr13:g.95877442C>T
chr14:g.20060861G>T
chr3:g.105751537T>C
chr19:g.12132491G>T
chr9:g.91220930C>A
chr19:g.53259198G>C
chr2:g.171117858C>T
chr19:g.2276352T>A
chr14:g.21373376C>G
chr5:g.24537524G>T
chr18:g.76988885G>A
chr3:g.167471839A>C
chr20:g.62836420G>T
chr18:g.10485501C>T
chr16:g.31488480C>T
chr2:g.38995320A>G
chrX:g.123613415G>A
chr11:g.128840155C>T
chr5:g.141423281C>G
chr3:g.195789900C>A
chr2:g.170178152G>A
chr12:g.6348737G>A
chrX:g.27980305G>T
chr11:g.134244950C>T
chr12:g.4274160G>T
chr6:g.25916721C>T
chr1:g.157801949G>T
chr22:g.31845079G>A
chr3:g.142447878C>G
chr11:g.54707739G>C
chr3:g.135192662T>G
chr8:g.48724729G>T
chr19:g.18396413G>C
chr22:g.44570551T>A
chr10:g.20279849G>T
chr1:g.46031419A>T
chr4:g.75872140A>T
chr14:g.22974866G>A
chr11:g.7062502G>A
chr16:g.729062C>A
chr1:g.247491462G>C
chr20:g.58853683G>T
chr17:g.80957727G>A
chr5:g.96416101C>G
chr13:g.37655231A>G
chr2:g.130074427C>T
chr6:g.116923155C>A
chr2:g.218643273A>T
chr17:g.79833950G>A
chr19:g.3633480T>C
chr17:g.27610052C>T
chr14:g.73740031C>A
chr5:g.45353108G>T
chr4:g.25847747G>A
chr22:g.42640104G>C
chr6:g.160069973T>A
chr22:g.46218323A>G
chrX:g.130402015G>A
chr2:g.26483648C>A
chr4:g.154570466G>A
chr5:g.179966923C>A
chr14:g.105479349G>T
chr11:g.60302682T>G
chr19:g.48639461T>G
chr12:g.117855543G>C
chr9:g.134789202C>T
chr3:g.179604871C>G
chr10:g.49323476T>C
chr3:g.165188591_165188592insC
chr4:g.70606689C>T
chr19:g.20258739T>C
chr6:g.167136549G>A
chr17:g.73285592G>A
chr5:g.122451334C>A
chr12:g.109139984G>T
chr7:g.150804394G>A
chr21:g.30430618C>A
chr19:g.57754637C>G
chr3:g.188874519A>G
chr12:g.12477869T>G
chr2:g.25328698G>T
chr11:g.59864058T>C
chr3:g.113657097G>T
chr12:g.6016566A>T
chr17:g.49405183C>A
chr2:g.21016645C>T
chr19:g.55932043T>C
chr10:g.49366378C>A
chr5:g.168469031A>G
chr14:g.24268546C>T
chr4:g.188097109T>A
chrX:g.151722642C>A
chrX:g.71302159G>T
chr11:g.5544620C>A
chr10:g.68483531G>C
chr6:g.117362683A>C
chr1:g.236583080C>G
chr13:g.52378020G>A
chr2:g.178774293G>T
chr14:g.93621857C>T
chr13:g.19294654T>A
chrX:g.129481151C>T
chr9:g.130854898G>A
chr16:g.30738481C>T
chr13:g.32124793A>T
chr17:g.74525995T>A
chr18:g.63643417C>T
chr2:g.239983638C>T
chr8:g.101543356G>A
chr12:g.116576030A>T
chr3:g.101712861T>C
chr7:g.122034341C>A
chrX:g.54238367C>A
chr6:g.30672792delGAGTGCA
chr16:g.32879691G>A
chr8:g.103420375C>T
chr15:g.41565136G>C
chr19:g.18266320G>A
chr4:g.37590324G>T
chr2:g.80303740G>T
chr16:g.70892481C>A
chr6:g.1390526G>A
chr19:g.33511052G>T
chr19:g.37153003T>A
chr1:g.233671310T>A
chr17:g.7408583C>T
chr9:g.122675504C>A
chr22:g.30244035G>T
chr11:g.67406876T>C
chr21:g.46129453A>T
chr16:g.66558279C>G
chr4:g.157336682G>T
chr5:g.78421842G>T
chr12:g.20616263A>C
chr1:g.28508860G>T
chr1:g.26039809delGCCACCGTCAGTGCCCAGATAT
chr14:g.20590537T>C
chr20:g.59191214G>T
chr17:g.77209478T>A
chr19:g.53992819C>A
chr5:g.177310526T>A
chr5:g.65260628C>A
chr7:g.4755240G>T
chr19:g.37738560C>G
chr2:g.165991742T>G
chr8:g.13499549C>T
chr9:g.104694738C>G
chr1:g.155061945G>A
chr2:g.73491310A>G
chr6:g.51619354T>A
chr5:g.91163869G>T
chr10:g.105167275C>A
chr14:g.18967756A>G
chr7:g.5065438C>T
chr2:g.228021764A>T
chr12:g.2449036G>A
chr2:g.21004390C>T
chr2:g.29022231C>A
chrX:g.100635665C>A
chr8:g.143562090G>T
chrX:g.21609589_21609590insAGTCTAA
chr3:g.186732547C>A
chr4:g.87163949G>A
chr6:g.99614688G>T
chrX:g.23988271T>C
chr3:g.147396393C>A
chr21:g.40338186C>T
chr11:g.55265230C>A
chr1:g.155614680C>T
chr19:g.13286646G>T
chr19:g.17725101G>T
chr3:g.190120606C>T
chr2:g.197416853T>C
chr15:g.79970829A>G
chr15:g.74902765G>T
chr8:g.24508663G>C
chr12:g.20717227C>A
chr2:g.27492677C>A
chr11:g.58190512G>C
chr19:g.31278002G>A
chr7:g.101040273G>T
chr6:g.97132697T>C
chr2:g.231455148G>T
chr5:g.57481739G>T
chr12:g.51913141C>A
chr11:g.14867527G>A
chr1:g.235182023C>G
chr1:g.41580309C>T
chrX:g.64919052G>T
chr11:g.44264970T>A
chr11:g.56252666T>C
chr3:g.107773473A>G
chr4:g.78317418A>G
chr19:g.7458621A>T
chr1:g.150629129C>A
chr3:g.39138871delG
chr2:g.219038575G>A
chr2:g.218164444C>A
chr1:g.203186598C>A
chr1:g.237589986C>A
chr14:g.89412139C>A
chr19:g.425173C>T
chr12:g.49047978C>A
chr11:g.33068726G>C
chr1:g.12777268G>T
chr22:g.24633397C>T
chr15:g.51377463G>A
chr3:g.42739771C>G
chr1:g.65570627G>C
chr21:g.44296433C>T
chr3:g.147395856G>A
chr4:g.112430836G>T
chr4:g.163472588G>T
chr2:g.167247865G>A
chr2:g.70961620T>G
chr12:g.12079680G>T
chr2:g.27057338C>T
chr16:g.72889898T>A
chr6:g.41249527G>A
chr11:g.59713628T>C
chr9:g.107331728G>A
chr19:g.55947997A>T
chr3:g.10039738C>G
chr19:g.57477333T>A
chr17:g.50089200G>C
chr2:g.130139593C>G
chr6:g.31883903_31883904insAAGAGAGAAATAAACTAT
chr6:g.154265922C>A
chrX:g.152700802A>C
chr6:g.170285116G>T
chr6:g.31810013G>C
chr2:g.108293773G>A
chr6:g.29427229C>A
chr1:g.145936391C>A
chr8:g.144416243A>C
chr7:g.137016104T>C
chr7:g.37259199A>G
chr8:g.39667996A>T
chr18:g.24377429A>C
chr2:g.189689602A>T
chr3:g.129670908C>G
chr10:g.46033386G>T
chr6:g.148440200G>T
chr9:g.96392417C>T
chr6:g.154818489C>T
chr17:g.6425586G>T
chr18:g.74436530G>T
chr10:g.26768896A>G
chr16:g.20770071G>T
chr2:g.146588648A>T
chr3:g.139020162C>T
chr3:g.48571104C>T
chr16:g.27484318C>A
chr11:g.123805637_123805638insA
chr17:g.58280008C>A
chr6:g.43013288C>G
chr10:g.26170511G>A
chr4:g.103160781T>C
chr19:g.54851253T>A
chr1:g.216323690G>A
chr20:g.56451861G>A
chr9:g.99218674C>T
chr8:g.24397702C>A
chr2:g.187383228T>A
chr16:g.31261714C>G
chr11:g.115229214A>C
chr1:g.103569827G>T
chr20:g.47004969G>A
chr10:g.35179282T>G
chr15:g.77615685G>C
chr17:g.10461025A>G
chr11:g.68917851C>G
chr1:g.158936948G>C
chrX:g.34130742G>T
chr4:g.119271320A>T
chr8:g.13100016A>T
chr2:g.33727729C>T
chr19:g.4292798C>T
chr19:g.56008850C>T
chr22:g.29265501C>T
chr5:g.60757540C>A
chr14:g.92941829G>T
chr1:g.158700407C>T
chr1:g.34089120delG
chr7:g.88145467A>G
chr11:g.2570692G>T
chr7:g.132198525C>A
chr1:g.46190334G>A
chr14:g.73860592C>T
chr7:g.31815954C>T
chr9:g.128332282G>T
chr16:g.55549393G>A
chr12:g.102165855G>A
chr5:g.3599267G>A
chr9:g.97034758C>T
chr3:g.160102352C>A
chr5:g.146340484T>A
chr11:g.5131730G>T
chr10:g.99972119C>T
chr8:g.143923172C>A
chr22:g.42210224C>A
chr11:g.61877528C>A
chr6:g.52238745G>T
chr7:g.30892182G>C
chr2:g.219027795G>A
chr6:g.10709374G>C
chr19:g.10486755C>A
chr19:g.9467676C>T
chrX:g.124641969A>G
chr16:g.83217402G>A
chr16:g.71879951C>A
chr13:g.109140483C>A
chr5:g.179708253G>A
chr17:g.68515397A>G
chr3:g.101361852C>A
chr5:g.100380106T>A
chr22:g.30555054G>A
chr2:g.207567506A>G
chr1:g.23094374C>G
chr2:g.36442672C>A
chr3:g.112471280G>C
chr6:g.32217069T>C
chr19:g.15464345G>T
chr3:g.146521697G>A
chr5:g.23526465G>T
chr1:g.248362061C>A
chr1:g.222543660C>T
chr6:g.24714395G>A
chr1:g.150226666_150226667insATATC
chr6:g.46689922G>T
chr19:g.48670808_48670809insT
chr11:g.408706G>A
chr2:g.15617311C>G
chr3:g.165773507C>A
chr16:g.49637215C>A
chr1:g.228283681C>A
chr14:g.69347145C>A
chr1:g.7935141C>A
chr11:g.4594286C>A
chr17:g.62788514C>A
chr17:g.10512409T>A
chr7:g.95252082G>T
chr10:g.87952119G>A
chr4:g.119292642delATC
chr12:g.72657009G>A
chr1:g.248038962G>T
chr6:g.30112797A>T
chr22:g.32159020G>A
chr19:g.22758752T>A
chr5:g.132579413C>T
chrX:g.131279342C>G
chr11:g.62527364G>T
chr1:g.158766469C>T
chr6:g.56618087C>G
chr14:g.21797745T>A
chr7:g.71416014G>T
chr1:g.207723637A>G
chr9:g.446556C>T
chr10:g.7579940G>A
chr19:g.52706847T>C
chr8:g.50502851T>A
chr18:g.33266993C>A
chr5:g.141241593C>G
chr17:g.50483373G>A
chr12:g.122868486G>A
chr9:g.712577G>A
chr3:g.193626131C>G
chr5:g.161331111G>T
chr7:g.48269095G>A
chr5:g.37722932C>T
chr7:g.123171805G>C
chr2:g.89142678T>C
chr15:g.62711927G>T
chr19:g.36720098C>T
chr12:g.20630096C>G
chr6:g.56059243C>A
chr13:g.47954468C>A
chr8:g.20174369G>C
chr5:g.119216971C>T
chr7:g.74529835T>C
chr2:g.154396031A>T
chr18:g.14542973C>A
chr7:g.28957499T>C
chr2:g.167249701A>G
chr8:g.25460440G>T
chr11:g.55297973T>A
chr10:g.16825084T>C
chr7:g.122019197_122019198insC
chr5:g.71532311G>C
chr14:g.104711103G>T
chr17:g.41315180G>C
chr1:g.29291953A>G
chr4:g.68063145G>T
chr6:g.150964968G>C
chr10:g.73760747T>A
chr1:g.3767360T>C
chr11:g.55651574G>A
chr7:g.35635424C>A
chr1:g.248099992T>G
chr11:g.58402979A>G
chr3:g.160366124G>A
chr10:g.12825679G>A
chr22:g.20995835C>T
chr11:g.117190247C>A
chr7:g.30875555G>T
chr19:g.40074755C>A
chr1:g.148998351G>C
chr2:g.71350155G>T
chr19:g.8961789G>C
chr5:g.141173286G>T
chr10:g.37136663C>A
chr1:g.197101653G>A
chr2:g.186762462C>G
chr10:g.97426352A>C
chr12:g.100212274T>A
chr8:g.104444331G>C
chr8:g.14554924C>A
chr8:g.33389552C>G
chr19:g.42442768C>T
chr17:g.29631733G>A
chr7:g.15390728T>A
chr19:g.35727535G>C
chr2:g.165354337G>T
chr4:g.6301182G>A
chr2:g.199433390C>A
chr6:g.112140845C>T
chr1:g.248474212C>T
chr11:g.60525266T>A
chr5:g.95482477C>G
chr17:g.77402489C>T
chr9:g.122381717G>T
chr8:g.98949519C>A
chr16:g.35169853A>G
chr6:g.166166662G>A
chr9:g.66920367G>T
chr14:g.105769510C>G
chr8:g.3018607C>A
chr12:g.10593863G>A
chr2:g.185807667G>A
chr1:g.33623434G>A
chr1:g.248180753G>A
chr3:g.113019673C>T
chr11:g.6955709A>G
chr13:g.95985305T>A
chr20:g.7914298T>A
chr7:g.141919127_141919128insAAAATGTATAGTT
chr4:g.56315517G>T
chr11:g.5884416G>T
chr19:g.54664427C>T
chr7:g.23729239A>T
chr9:g.76502574G>T
chr2:g.124417493G>C
chr2:g.63378400G>A
chr8:g.131984155A>G
chr12:g.56718518G>A
chr4:g.15557362A>T
chr2:g.189705132G>A
chr2:g.210656586C>A
chr9:g.99015434C>A
chr4:g.52060830G>T
chrX:g.145822989C>T
chr8:g.7056686G>T
chr5:g.54518827delTGAAGAGCTACATCTCCTACAAGCTGG
chr15:g.22462435T>A
chr11:g.57326389G>C
chr17:g.81104006A>G
chr2:g.3697442C>A
chr19:g.57750848G>C
chr10:g.103603262C>G
chr6:g.24472617C>G
chr5:g.141150765A>G
chr16:g.19700436C>T
chr1:g.166936670C>A
chr19:g.39435928G>A
chr3:g.197776970A>G
chr12:g.2864446A>G
chr20:g.44489545delG
chr14:g.104940078G>T
chr22:g.21688774G>T
chr11:g.124424592C>A
chr5:g.141361811C>T
chr7:g.71810339C>A
chr13:g.32294509delA
chr12:g.9841829T>A
chr12:g.45851715C>G
chr4:g.79407218A>G
chr11:g.65919959G>C
chr3:g.184711802C>G
chr6:g.149919450G>T
chr10:g.30369402C>A
chr10:g.32584301C>G
chr11:g.76660799G>T
chr7:g.31103251C>A
chr12:g.9153219T>C
chr20:g.57523896G>A
chr4:g.2341555G>A
chr18:g.68837172C>A
chrX:g.135760220delG
chr2:g.221430004T>A
chr2:g.230910049G>T
chr4:g.73450669G>A
chr8:g.103885995G>C
chr5:g.141399189A>C
chr2:g.21006314G>T
chr6:g.155130024C>A
chr2:g.179151346A>G
chr17:g.31357036G>T
chr3:g.46863285C>A
chr1:g.228408389T>A
chr1:g.13306071G>C
chr3:g.126989731G>A
chr13:g.91907962G>C
chr8:g.138148529C>A
chr20:g.58311097G>A
chrX:g.80930085G>T
chr11:g.62575826C>A
chr6:g.6305484C>A
chr6:g.116806671A>T
chr4:g.70409693C>A
chr10:g.116443077C>T
chr12:g.120144984C>T
chr5:g.59988628G>A
chr7:g.44766579T>A
chr8:g.68069137G>T
chr8:g.138152476C>A
chr19:g.8978182G>A
chr12:g.7716969G>A
chr5:g.157816824T>C
chr8:g.142344203C>T
chr7:g.149780915C>T
chr4:g.75990782G>C
chr5:g.5303312G>C
chr11:g.20636347C>G
chr19:g.50689287G>A
chr13:g.101598235G>T
chr2:g.6895832G>A
chr7:g.128850802G>A
chr8:g.53769715T>G
chr10:g.100189531delA
chr6:g.42676085G>T
chr1:g.74620831A>G
chr4:g.105234165A>T
chr18:g.24333084G>A
chr11:g.17509772C>A
chr17:g.14076911G>C
chr19:g.22977032C>G
chr12:g.7925854G>T
chr5:g.127410584C>T
chr2:g.165389500C>A
chrX:g.73848627A>C
chr1:g.23530589C>A
chr7:g.103490676G>T
chrX:g.133025828C>T
chr19:g.54854004C>A
chr12:g.48681774delGCCCTCCCCAAGTCTCCACAGGCATCT
chr2:g.148761794G>C
chr19:g.13877745G>A
chr17:g.47744782C>T
chr22:g.39031721G>T
chr2:g.241852344G>T
chr4:g.272009C>T
chr19:g.17788411G>T
chr3:g.153484532G>T
chr5:g.141151934G>A
chr3:g.123700677G>A
chr5:g.141124296G>A
chr22:g.22881258A>T
chr2:g.153478340G>A
chr1:g.5863434C>A
chr11:g.6026985C>T
chr10:g.70778501A>G
chr19:g.57909894G>C
chrX:g.145823976G>C
chr19:g.51000167A>T
chr1:g.207618177G>T
chrX:g.126164711G>T
chr3:g.169982883A>C
chr6:g.70216909C>A
chr2:g.169631924A>T
chr7:g.152181724G>T
chr6:g.25581301G>T
chr1:g.247739129T>A
chr2:g.135024635G>T
chr7:g.8086693A>T
chr11:g.56376066C>T
chr11:g.73309239C>A
chr11:g.59211442G>A
chr1:g.159068566A>G
chr19:g.52016985delG
chr1:g.173807416A>T
chr2:g.90100317delG
chr19:g.46989633C>A
chr3:g.126006720C>G
chrX:g.50090318G>C
chr11:g.67424173C>T
chr1:g.237643431G>T
chr22:g.17738091delGGAGCAAG
chr6:g.32129735G>C
chr9:g.120866966C>T
chrX:g.79363061A>T
chr12:g.113101968C>T
chr10:g.77184825G>A
chr15:g.34103821A>T
chr8:g.109523319T>C
chr12:g.7485150G>A
chr22:g.37373983C>T
chr1:g.6264651delC
chr9:g.124881805G>A
chr11:g.72329750C>T
chr12:g.54362595C>T
chr11:g.22370159G>T
chr15:g.47770623G>A
chr4:g.103079610C>A
chr12:g.122473926G>A
chr4:g.42143653C>T
chr6:g.150960311G>T
chrX:g.18952502T>A
chr3:g.42908091C>A
chrX:g.154432316G>T
chr1:g.27355689G>T
chr10:g.96984074G>T
chr22:g.30337852T>A
chr1:g.200976828G>A
chr10:g.122631166C>G
chr1:g.44001573G>A
chr4:g.159332499delC
chr2:g.225582415G>T
chr4:g.47426031T>C
chr21:g.21410317G>T
chr7:g.96709769C>G
chr19:g.54221193G>C
chr22:g.46215237C>T
chr6:g.69339353G>T
chr12:g.68732669G>T
chr22:g.29489324C>A
chr2:g.26280112C>G
chr8:g.144474398_144474399insC
chr2:g.131444556G>A
chr19:g.54063926T>C
chr3:g.121381451G>T
chr8:g.61642901G>C
chr12:g.4810883G>A
chrX:g.47181810G>T
chr19:g.8951278C>A
chr2:g.24742068A>T
chr7:g.122013440G>A
chr15:g.81344045C>T
chr1:g.41579931T>C
chr11:g.5324089A>C
chrX:g.24843676_24843677insGGC
chr6:g.165396441G>T
chr12:g.53123093C>T
chr12:g.41070096G>T
chr2:g.178747063C>A
chrX:g.145823876G>T
chr2:g.15167310T>C
chr11:g.822507C>A
chr3:g.133620319C>T
chr14:g.93218708C>T
chr1:g.169169466G>A
chr16:g.89935447C>T
chr17:g.76081651T>A
chr19:g.48970958C>A
chr8:g.112244568T>A
chr11:g.55604054C>A
chr20:g.38895597G>A
chr4:g.186600059delT
chr9:g.20770056G>C
chr14:g.19780674A>G
chr7:g.100119778C>G
chr6:g.160718299C>A
[truncated: 8,000 more rows]

## Sheet: OV
chr17:g.7675088C>T
chr17:g.7674220C>T
chr17:g.7674221G>A
chrX:g.100686925T>C
chr17:g.7674872T>C
chr17:g.7673802C>T
chr17:g.7674947A>G
chr20:g.18316269G>T
chr19:g.53679964G>A
chr10:g.95314984A>T
chr2:g.151464674C>T
chr17:g.7673803G>A
chr17:g.7675124T>C
chr17:g.7674241G>A
chr1:g.170998644A>T
chr19:g.52801067A>G
chr15:g.80168055delG
chr17:g.7674957G>A
chr6:g.73519043A>G
chr17:g.7675143C>A
chr10:g.45827364T>G
chr8:g.120370501T>G
chr16:g.15104542T>A
chr17:g.7675052C>A
chr2:g.102505332delC
chr17:g.7674945G>A
chr17:g.7675085C>T
chr1:g.144436988C>A
chr7:g.111122586delT
chr11:g.65535992A>C
chr12:g.25245350C>A
chr17:g.7673776G>A
chr13:g.114324096A>G
chr11:g.77764436G>C
chr17:g.7674229C>T
chr17:g.40412905T>G
chr17:g.7673704G>A
chr19:g.37413251C>A
chr1:g.144427921T>C
chr20:g.44758168C>G
chr1:g.146986469A>C
chr2:g.209730511T>G
chr16:g.24555359G>T
chr21:g.14964584A>C
chr12:g.111644247_111644248insC
chr20:g.46501953T>C
chr15:g.41464812delAA
chr19:g.53679965G>A
chr2:g.164492885G>A
chr1:g.162754693G>C
chrX:g.34131566T>C
chr1:g.247257141A>T
chr6:g.26217357A>T
chr17:g.7674894G>A
chr19:g.14964146_14964147insC
chr9:g.18504912C>T
chr13:g.19824594A>C
chr17:g.7674954G>A
chr19:g.14039764_14039765insC
chr7:g.6691693A>T
chr1:g.95191993_95191994insA
chrX:g.72204838_72204839insC
chr19:g.53165049A>T
chr17:g.40477469C>T
chr19:g.14097640C>T
chr6:g.127196107T>G
chr17:g.7675085C>A
chr17:g.7670685G>A
chr1:g.114713908T>C
chr1:g.35736339G>A
chr3:g.133618146T>G
chrX:g.72129952_72129953insG
chr17:g.7674250C>T
chr6:g.150022169C>T
chr21:g.25741579T>G
chr12:g.62560294A>T
chr17:g.7674885C>T
chr8:g.85341635delT
chr2:g.227312011_227312012insA
chr15:g.59208187A>T
chr17:g.7674262T>C
chr17:g.20504224G>T
chr17:g.7674292T>C
chr2:g.208355499_208355500insAGATTA
chr17:g.7675174C>T
chr17:g.7673534C>T
chr7:g.55400104G>A
chr1:g.13781984A>T
chr2:g.149471113A>G
chr17:g.7673806C>T
chr11:g.118259847T>C
chr2:g.200861116T>A
chr14:g.101039694G>C
chr14:g.55350431_55350432insC
chr17:g.7674950A>C
chr2:g.9527585T>C
chr1:g.16996T>C
chr19:g.23827625G>A
chr6:g.111222338C>A
chr17:g.7675076T>C
chr13:g.30461272A>G
chr7:g.6691692C>G
chr3:g.48269391A>C
chrX:g.152708879C>A
chr17:g.7673824C>T
chr3:g.48269387T>C
chr17:g.7673802C>A
chr17:g.7673796C>T
chr17:g.7674921C>A
chr9:g.122855228G>A
chr10:g.48050295T>C
chr17:g.40412947C>A
chr2:g.163610511G>T
chr9:g.125153613delA
chr19:g.39464839G>T
chr17:g.7675232G>A
chr19:g.58339022A>G
chr17:g.7675161G>A
chr22:g.41209895G>A
chr20:g.18316689delG
chr5:g.180626192T>A
chr19:g.16157304_16157305insC
chr11:g.83469265G>T
chr17:g.7673787G>C
chr3:g.150742046A>C
chr2:g.100948278A>G
chr8:g.143730375G>C
chr5:g.140641598G>A
chr10:g.99957264C>G
chr11:g.64931606G>A
chr7:g.99676275A>G
chr8:g.30842472A>G
chr7:g.152163674T>C
chr19:g.8981324G>T
chr16:g.53304213C>A
chr17:g.7675082G>C
chr8:g.32763944A>C
chr17:g.76292884C>T
chr14:g.24241673A>C
chr6:g.157206382T>G
chr2:g.201398341T>A
chr1:g.210682931delC
chr17:g.7673787G>A
chr4:g.109301769T>C
chr15:g.44711547A>G
chr17:g.7674281_7674282insA
chr17:g.76292883G>C
chr19:g.49651077C>G
chr1:g.93567826G>A
chr17:g.7674230C>T
chr7:g.11426671delCCT
chrX:g.73845902G>A
chr1:g.152216386G>A
chr12:g.6814465T>G
chr2:g.178609438T>C
chr4:g.54264081C>T
chr14:g.67885917delAG
chr11:g.43449732G>C
chr2:g.199272613C>T
chr16:g.68122207C>T
chr17:g.68542737G>C
chr3:g.47427556A>C
chr9:g.108855224A>T
chr17:g.7676398delG
chr18:g.58985617C>T
chr17:g.7674253A>T
chrX:g.54758710T>C
chr3:g.9827101C>T
chr3:g.56593557C>G
chr7:g.107929729A>T
chr7:g.126533070C>A
chr2:g.186828129G>C
chr4:g.78466349G>A
chr17:g.40876251T>A
chr4:g.81089429A>G
chr9:g.81593259G>A
chr9:g.77424142C>T
chr1:g.109213983A>C
chr6:g.22294456G>A
chr19:g.55912605T>A
chr3:g.53189134G>T
chr19:g.53165702T>C
chr17:g.80381865_80381866insAAG
chr3:g.48566921G>C
chr20:g.37007435G>A
chr13:g.19177224C>T
chr12:g.57796523G>A
chr8:g.144842181G>A
chr10:g.92531860C>T
chr17:g.42581918C>G
chr20:g.32074698C>T
chr6:g.131850007C>T
chr19:g.35337995C>T
chr1:g.9716537T>G
chr10:g.123162926G>A
chr2:g.178612457T>C
chr1:g.39897784G>C
chr12:g.56324678A>T
chr2:g.70181277A>G
chr17:g.7674252C>A
chr1:g.27550153T>G
chr14:g.101040083A>G
chr17:g.7673823C>A
chr5:g.78815934C>T
chr9:g.37512569C>G
chr17:g.7674953T>C
chr13:g.41130440T>A
chr7:g.5064986C>T
chr5:g.149010388G>T
chr16:g.48347507G>C
chr1:g.84495982T>C
chrX:g.49173234A>T
chrX:g.120626720delA
chr20:g.58905439C>G
chr17:g.16818915C>T
chr16:g.27777668_27777669insG
chr20:g.18489803C>G
chr12:g.101292082T>A
chr8:g.47927836A>T
chr16:g.3232509G>T
chr17:g.7673823C>T
chr2:g.43574657_43574658insC
chr17:g.7674211A>C
chr10:g.49366302G>A
chr10:g.17796441C>T
chr14:g.39177903T>C
chrX:g.101401540T>C
chr3:g.36830949C>T
chr8:g.81714010G>A
chr14:g.45189019G>T
chrX:g.73845056G>A
chr1:g.248273148C>G
chr9:g.110407305A>T
chr11:g.66693073T>C
chr9:g.32543441G>A
chr2:g.70181276G>C
chr9:g.5465801delG
chr11:g.27657569A>G
chr3:g.9435892A>G
chr1:g.120833733A>G
chr1:g.15467444G>A
chr2:g.106145349C>G
chr14:g.39181036T>G
chr19:g.51587953A>C
chrX:g.73845451T>C
chr1:g.119893867T>C
chr19:g.54990164_54990165insG
chr20:g.10672820C>T
chr17:g.18317945T>C
chr13:g.113322287G>A
chr6:g.155428905_155428906insG
chr2:g.109615466A>C
chr5:g.136356759T>A
chr4:g.141721071T>C
chr3:g.184375893T>A
chr19:g.19647242G>T
chr14:g.105272767C>G
chr3:g.194136916C>G
chr8:g.59118949G>A
chr18:g.45852331T>A
chr9:g.70044214T>C
chr1:g.145578886T>C
chr12:g.70754420_70754421insC
chr5:g.179620893T>A
chr17:g.7675182G>A
chrX:g.50069700G>C
chr20:g.32436680T>G
chr4:g.57024058T>A
chr16:g.55326509A>T
chr3:g.49681187C>G
chr7:g.55143338G>A
chr11:g.104949162G>C
chr5:g.13770764C>T
chr2:g.11182953delTATATA
chr16:g.670479_670480insG
chr19:g.53577892C>T
chr17:g.78501990T>A
chr6:g.131877301C>T
chr20:g.18315649G>T
chr5:g.131960571C>T
chr2:g.202276457C>A
chr4:g.13604370T>A
chr1:g.11139545C>T
chr2:g.219248517G>C
chr1:g.120833687T>C
chr6:g.31639076T>A
chr11:g.113986610_113986611insC
chr3:g.180609532T>G
chr17:g.7673835C>A
chrX:g.48523901G>A
chr16:g.10761452G>A
chr15:g.38351786A>T
chr2:g.178605360A>G
chr15:g.41766791C>G
chr19:g.53751223T>A
chr17:g.7673740C>A
chr1:g.156526406A>T
chr19:g.54636933_54636934insC
chr9:g.7170055T>C
chr2:g.88804870G>A
chr7:g.100098142T>A
chr6:g.30686300G>T
chr15:g.39992038_39992039insG
chr2:g.108010250G>A
chr18:g.35478287G>A
chr6:g.31717680A>T
chr12:g.121417714C>A
chr1:g.149055467A>C
chr17:g.7674233C>T
chr19:g.15890414G>C
chr19:g.57941422T>A
chr3:g.179234297A>G
chr1:g.144593013T>A
chr3:g.46450662C>G
chr1:g.146140007C>T
chr3:g.46373712T>G
chr5:g.67163726G>A
chr12:g.25119190C>A
chr3:g.107377916C>A
chr7:g.1567769C>G
chr2:g.96144251G>C
chr1:g.207079238_207079239insCT
chr15:g.25215572A>C
chr17:g.7674218T>C
chr1:g.151067623C>A
chr2:g.178582498T>A
chr1:g.93567825A>C
chr15:g.97965622G>A
chr17:g.7675216C>A
chr3:g.169796061T>C
chr3:g.152300136_152300137insG
chr1:g.171541106A>G
chr14:g.24338666A>G
chr8:g.3230209G>A
chr8:g.58146948G>A
chr15:g.50493337G>T
chr17:g.42845502A>G
chrX:g.96965112C>G
chr11:g.62691307G>T
chr17:g.7674240delG
chr19:g.36719495A>C
chr11:g.118627640A>T
chr12:g.50222686delC
chr17:g.39765966A>T
chr1:g.158254595C>A
chr11:g.85726235_85726236insA
chr13:g.49630639_49630640insG
chr22:g.50605019A>C
chr2:g.208355501_208355502insAAA
chr8:g.166636A>C
chr19:g.57686547C>G
chr13:g.45194623_45194624insT
chr2:g.178777345G>A
chr8:g.66515950A>G
chr3:g.53719762A>C
chr6:g.152262149T>C
chr11:g.6631393C>G
chr12:g.121320446G>A
chr5:g.180911603T>A
chr17:g.7673781C>A
chr7:g.99573686C>T
chr22:g.29297875A>G
chr4:g.78337883C>A
chr17:g.7674939C>A
chr1:g.229636437G>C
chr1:g.224413217C>A
chr14:g.74494883G>T
chr20:g.18315638G>A
chr5:g.139476252delC
chr2:g.178569141T>G
chr15:g.68187857A>C
chr5:g.72195088C>A
chr16:g.22140185_22140186insC
chr14:g.24061602A>C
chr2:g.15945671delCCTTCCCATCCA
chr1:g.17228702G>T
chr14:g.39401506T>G
chr15:g.25203143T>G
chr15:g.78234372T>A
chr1:g.18365544C>T
chr16:g.4650467G>C
chr6:g.31658323T>A
chr17:g.1576689C>T
chr12:g.98626002G>C
chr20:g.2655502G>A
chr7:g.157223061C>A
chr13:g.77098623G>A
chr5:g.7802251G>A
chr19:g.37412834A>G
chr7:g.94555900A>G
chr8:g.138132608G>T
chr4:g.119293367G>A
chr16:g.3015669A>G
chr2:g.112576061G>C
chr15:g.85580945_85580946insC
chr18:g.63723648G>T
chr1:g.11796260T>A
chr6:g.30918793G>A
chr11:g.62521502T>C
chr7:g.82915858G>A
chr12:g.4615656G>C
chr11:g.56470003G>A
chr9:g.137564615G>C
chr17:g.7675136G>A
chr6:g.56617065C>T
chr1:g.24672566G>A
chr1:g.119393790C>T
chr1:g.120890245T>C
chr19:g.6664821A>T
chr17:g.39408154T>G
chr19:g.17300953delC
chr10:g.131166834C>T
chr17:g.7260870C>A
chr19:g.53165044T>A
chr2:g.173359333G>T
chr1:g.152306196C>T
chr15:g.99130646G>T
chr19:g.36183312C>A
chr4:g.139719522C>G
chrX:g.44844104C>T
chr19:g.15185546_15185547insG
chr6:g.31658324G>T
chr12:g.4627267C>A
chr4:g.69589447T>C
chr19:g.58599081A>G
chr17:g.7674972C>T
chr2:g.73452913G>A
chr12:g.51246272delA
chr17:g.2321329A>T
chr12:g.5599610G>A
chr11:g.314180G>A
chr5:g.42719693G>T
chr8:g.14090060T>C
chr1:g.84204635G>T
chr16:g.89222097C>T
chr19:g.52950141G>A
chr17:g.7674972C>G
chr20:g.1980550G>A
chr1:g.44801717C>T
chr7:g.123953466A>T
chr7:g.75162963T>C
chr20:g.18316690G>A
chr9:g.27455589A>C
chr12:g.122206521T>C
chrX:g.50069608T>A
chr12:g.52901939G>A
chr4:g.110051066C>A
chr10:g.89327915T>C
chrX:g.108736298C>G
chrX:g.132077650T>A
chr19:g.39433606G>C
chr2:g.241096122T>G
chr1:g.8957208C>T
chr10:g.89339677C>T
chr3:g.130723569C>T
chr19:g.7640177T>C
chr19:g.58068044G>A
chr17:g.7675232G>T
chr12:g.30711755A>G
chr11:g.710430A>T
chrX:g.112671061C>T
chr3:g.112605317G>A
chr3:g.133934659G>C
chr1:g.211313839A>G
chr5:g.150201130C>G
chr9:g.110408174T>A
chr11:g.55572486G>A
chr17:g.39711955C>T
chr11:g.320759_320760insG
chr10:g.114202273C>T
chr17:g.7675192delG
chr5:g.139414222G>T
chr1:g.149887240G>C
chr9:g.19058104T>A
chr17:g.7513810C>G
chr19:g.12647481C>T
chr2:g.210591862A>C
chr1:g.53262098C>A
chrX:g.102657926T>A
chr22:g.26434228C>T
chr2:g.165991456A>G
chr3:g.168041446_168041447insACAAATGGAGCTTATGACTCTTG
chr19:g.10805931C>G
chr8:g.52657630C>T
chr12:g.10430782T>A
chr1:g.205271250_205271251insCACATAACACTCATCTTACGCTATTTTGTGCCT
chr2:g.152637630T>G
chr1:g.155169533G>C
chr6:g.26469200T>G
chr4:g.123402335T>C
chr3:g.158102853G>A
chr14:g.64162475delTGG
chr7:g.121127212A>T
chr17:g.7039861T>C
chr1:g.175362807C>G
chr12:g.12975235C>T
chr19:g.46919873G>T
chr17:g.62744402G>T
chr3:g.14479151A>G
chr13:g.20189339C>T
chr2:g.20202880G>C
chr4:g.17803550T>C
chr8:g.7055374T>C
chr1:g.45355417_45355418insC
chr11:g.115238641_115238642insCTTGG
chr7:g.5729542A>G
chr22:g.46693501C>G
chr6:g.32222568G>A
chr4:g.112540880T>C
chr7:g.106883079G>C
chr3:g.180323919G>A
chr1:g.154983365G>A
chr3:g.66386147G>C
chr19:g.5616280C>T
chr2:g.167955382T>G
chr19:g.49651074G>A
chr11:g.30012040G>C
chr19:g.21726590C>A
chr12:g.124327581C>T
chr1:g.236226493C>T
chr1:g.45018487C>T
chr16:g.72104014G>A
chr6:g.28995376C>G
chr15:g.62717583C>T
chr17:g.44075329G>A
chr17:g.50607900delTG
chr17:g.4540437T>C
chr12:g.101761577C>T
chr17:g.35258666T>G
chr7:g.143813016G>A
chr7:g.18829259_18829260insT
chr1:g.152410273G>T
chr1:g.176027586G>A
chr5:g.98901058C>A
chr5:g.83538583T>G
chr9:g.104751066G>T
chrX:g.121049244A>C
chr1:g.231537273G>A
chr6:g.31934175G>C
chr10:g.67988827_67988828insAATATAT
chrX:g.1643004C>T
chr1:g.204149824G>A
chr5:g.33937417C>T
chr17:g.76629355G>A
chr3:g.172362743C>A
chr19:g.2222163T>C
chr5:g.58455359C>T
chr5:g.55146723G>A
chr7:g.107975827A>G
chr7:g.47978519C>T
chr11:g.114186998G>A
chr13:g.37104466C>G
chr3:g.51980516G>A
chr3:g.101417646_101417647insGGC
chr17:g.35186862A>T
chr5:g.14399109_14399110insATAA
chr16:g.29904855T>A
chr4:g.161481029T>A
chr19:g.799413C>G
chr8:g.39136689G>T
chr13:g.31136941C>G
chr6:g.31505763G>A
chr17:g.3755883C>T
chr2:g.218558668T>C
chr2:g.31260634C>A
chr11:g.86245227A>C
chr6:g.57099134A>C
chr1:g.202310264T>C
chrX:g.73827519A>G
chr11:g.105753174T>A
chr11:g.62576520G>A
chr2:g.178618395T>A
chr3:g.101243973T>C
chr9:g.81913657G>T
chr1:g.152310187G>A
chr2:g.135808832delA
chr12:g.43430416T>A
chrX:g.107926715G>A
chr17:g.42809762A>T
chr19:g.52583512G>C
chr17:g.76545272T>C
chr12:g.108938891A>T
chr9:g.122270939C>T
chr12:g.52451852C>G
chr14:g.33215342C>T
chr8:g.144842868A>G
chr12:g.20680312G>T
chr1:g.229302942G>A
chr3:g.49700706T>A
chr19:g.19004221_19004222insCGCTCTTGTTGCCCAGGCTGGAGTGCAGTGGTG
chr15:g.89690680C>A
chr7:g.88196490A>G
chr1:g.631582A>G
chr1:g.202596760C>G
chr6:g.30921273delC
chr17:g.36431620C>T
chr5:g.172339093C>G
chr2:g.8682478delA
chr11:g.65598543G>A
chr19:g.52291091A>T
chr10:g.45303890G>A
chr17:g.59697851C>T
chr6:g.26251682C>T
chr13:g.24321812_24321813insGATTACAGGTGTGAGCCAC
chr20:g.32149675C>T
chr8:g.101543419C>T
chr5:g.95731960T>C
chrX:g.16852558_16852559insT
chrX:g.73848888G>A
chrX:g.24812760G>T
chr7:g.76358817_76358818insATATGACAAAGATGATGTATTCATGGA
chr5:g.43280265A>T
chr12:g.31442880A>G
chr19:g.8974494T>C
chr15:g.41696385T>A
chr4:g.56488009G>A
chr19:g.35800076G>A
chr1:g.233014754G>C
chr1:g.200911461C>A
chr3:g.44631221G>T
chr9:g.76846586G>A
chr21:g.38299620_38299621insAAGG
chr3:g.135166023G>A
chr10:g.27249436G>T
chr14:g.102435090A>G
chr5:g.180302471A>G
chrX:g.54757775T>G
chr3:g.53874250A>G
chr7:g.139600537G>A
chr1:g.186151197T>G
chrX:g.70651524C>T
chr2:g.73700812G>A
chr11:g.46875818C>T
chr7:g.90413355C>G
chr16:g.57469776C>G
chr3:g.96987948T>G
chr3:g.194342224A>C
chr21:g.36765078G>A
chr20:g.18814178C>A
chrX:g.72140896C>G
chr2:g.38858826T>A
chr1:g.228288854G>A
chr12:g.116720347G>A
chr14:g.24209924C>T
chr16:g.56870111T>A
chr7:g.82951431T>A
chr9:g.108999130C>T
chr8:g.668793C>T
chr4:g.89247829C>T
chr5:g.141639874G>T
chr15:g.45362188G>T
chr5:g.141209772C>T
chr15:g.85579989C>T
chr15:g.74622212G>T
chr6:g.142772316A>G
chr17:g.45024536C>G
chr17:g.4797687A>G
chr3:g.15645390C>G
chr3:g.155514803C>G
chr5:g.140436203C>T
chr1:g.152622971G>A
chr3:g.38792163A>G
chr10:g.28056530C>G
chr5:g.140564034C>T
chr4:g.84702458C>A
chr5:g.124744644delTAGCATCCTTAGAAGTTTTAC
chr12:g.56315145C>T
chr17:g.44907276G>A
chr20:g.3221853G>A
chr13:g.67225531G>T
chr10:g.68381306C>T
chrX:g.20138624T>G
chr2:g.148468541C>T
chr11:g.129914988G>T
chr9:g.135821119G>C
chr22:g.50064058G>A
chr22:g.17904723C>T
chr7:g.149254174G>C
chr1:g.159813510C>A
chr4:g.13338205T>A
chr11:g.122855781A>G
chr3:g.38348582T>G
chr2:g.70706376C>T
chr19:g.32868552C>T
chr12:g.6644438C>T
chr19:g.45872797C>T
chr7:g.148800531A>T
chr7:g.31848088G>T
chr7:g.73316642A>C
chr12:g.2827176C>G
chr4:g.15630725C>A
chr1:g.158328178C>G
chr12:g.52487916G>T
chr14:g.94569539A>G
chr5:g.141187796C>A
chr10:g.99793637A>C
chr11:g.62595839G>C
chr14:g.72977970A>C
chr19:g.35777883A>T
chr1:g.231241149C>G
chr12:g.132714911A>G
chr1:g.205584895_205584896insCCTGGCTTCTTAGGTTGGGATGGCTCAGCTT
chr9:g.95482239C>G
chr2:g.219006220G>C
chr9:g.128836851A>C
chr12:g.47235209G>C
chr1:g.158480591T>C
chr3:g.49099137G>T
chr22:g.45931207G>C
chrX:g.116462880C>A
chr1:g.114780124T>A
chr10:g.49322914G>A
chr19:g.54909244G>C
chr3:g.161251081_161251082insGAA
chr9:g.35689822G>T
chr15:g.88878043G>A
chr16:g.48083500C>A
chr5:g.141182705G>C
chr5:g.6605316delTT
chrX:g.53086011G>A
chr22:g.41395844G>C
chr15:g.48415748G>A
chr17:g.60158347G>C
chr3:g.172509280G>A
chr9:g.65283309T>C
chr9:g.41132228C>G
chr16:g.87412458T>C
chr12:g.69817725G>C
chr5:g.42800913C>G
chr5:g.132702568G>A
chr12:g.129078579G>T
chr11:g.35286926delGAAAGGT
chr3:g.89450347G>A
chr10:g.50810009_50810010insTTTCTGTGATTC
chr3:g.120334908A>C
chr16:g.23690977C>T
chrX:g.47027900C>T
chr9:g.27168507C>A
chr1:g.119949077delC
chr18:g.9208764G>A
chr3:g.170129430G>T
chr8:g.74845390G>T
chr10:g.97064215G>A
chr1:g.39965875T>A
chr6:g.149526649T>C
chr19:g.21972947T>G
chr12:g.55936273C>G
chr2:g.112586061G>A
chr6:g.28995730_28995731insTCCTTTTTTCAGTTTCCAAAATTTTGT
chr1:g.152304412C>A
chr2:g.17592199G>A
chrX:g.34130187A>T
chr14:g.21978569C>A
chr18:g.5415931A>G
chr6:g.152233894G>A
chr2:g.151463086C>T
chr8:g.144842878A>C
chr16:g.89100972G>T
chr1:g.248917771G>C
chr6:g.89638331T>A
chr6:g.152450720G>A
chr1:g.179559694C>T
chr3:g.38728733G>A
chr12:g.6841574C>G
chr16:g.66943368A>G
chr15:g.45682539T>A
chr5:g.7804657G>T
chr7:g.147486025G>C
chr21:g.36292232_36292233insTCAGACATTCACACAGCTTGAAGAAGATCTAAAA
chrX:g.137567710C>G
chr6:g.34887810C>T
chr1:g.235438853G>C
chr3:g.179244684_179244685insAA
chr1:g.156912851T>C
chr1:g.220635462C>G
chr3:g.183493988C>T
chrX:g.47576202T>C
chr17:g.35441185G>C
chr4:g.103114500A>G
chr8:g.41717003C>A
chr10:g.27860627T>A
chr1:g.9038854C>T
chr16:g.3016023G>A
chr15:g.57440400C>A
chr14:g.95475772T>G
chr8:g.22416216G>A
chr1:g.148103514T>C
chr2:g.203278685A>G
chr15:g.86271628C>A
chr10:g.46810124C>T
chr7:g.154944147C>T
chr18:g.37067209A>T
chr14:g.96241107A>T
chr6:g.52269180G>A
chr1:g.167765693G>A
chr11:g.47638711A>T
chr15:g.23008818A>G
chr9:g.114209492C>T
chr5:g.119632830T>A
chr15:g.74195369C>G
chr14:g.106129572G>A
chr2:g.99398892G>C
chr15:g.43397246A>C
chr1:g.185933605G>T
chrX:g.134540189A>T
chrX:g.53196932C>T
chr2:g.71669654C>T
chr7:g.144453653C>G
chr7:g.94618950G>A
chr15:g.79293628A>C
chr19:g.49337194A>C
chr8:g.68640458C>A
chr20:g.17481586A>G
chr10:g.66927148T>A
chr1:g.12774962C>G
chr7:g.155308339delAAGATTATCTTTTTTCTT
chr5:g.136978723G>T
chr20:g.20262991C>A
chr20:g.33397050C>A
chr20:g.45419532A>G
chr1:g.223268604T>A
chr20:g.45542652C>A
chr5:g.83539798T>C
chr12:g.4810611C>G
chr19:g.17301094_17301095insT
chr19:g.12628407T>G
chr14:g.23097850_23097851insTCTGGGTCCCTCCACTCTGAC
chr21:g.46240879A>G
chr1:g.161161014C>T
chr17:g.62274067C>T
chr7:g.24680458G>A
chr11:g.118503504T>G
chr1:g.47117851C>A
chr7:g.145010225C>T
chr7:g.117719563C>A
chr12:g.32337795G>A
chr7:g.36443764G>C
chr22:g.20838668G>A
chr16:g.56362099T>C
chrX:g.111759918T>G
chr16:g.19536347G>C
chr2:g.17592116G>T
chr3:g.30672115A>C
chr10:g.112157257A>T
chr4:g.3212016G>A
chr8:g.1860046G>A
chr1:g.201221591_201221592insG
chr7:g.30778469G>C
chr17:g.7676144delA
chr19:g.13262780C>T
chr12:g.26916051G>C
chr2:g.169083507T>G
chrX:g.135911203A>T
chr2:g.136116152G>C
chr18:g.76442574delC
chr1:g.15930219_15930220insG
chr14:g.102010019G>A
chr21:g.33488676T>G
chr19:g.40801170G>C
chr12:g.49630618C>T
chr19:g.44793534delA
chr1:g.214357885G>C
chr1:g.226152399G>C
chr3:g.45796339G>T
chr12:g.52241556A>G
chr11:g.33353729T>C
chr17:g.78501219G>T
chr6:g.25619698_25619699insCTAAACC
chr17:g.75243109G>T
chr3:g.100352480C>T
chr16:g.4762609T>A
chr9:g.35610670G>T
chr11:g.130200110A>C
chr5:g.66050858C>T
chr11:g.112214954delAAC
chr1:g.113981783delT
chr6:g.29355474C>A
chr11:g.106827439G>C
chr2:g.197418523A>T
chr10:g.97884303A>C
chr19:g.52366300G>A
chr19:g.8947365_8947366insATCAACAACACCCAACTGGGTAGAAA
chr19:g.22392489C>T
chr12:g.6044300G>T
chr13:g.72755220delGC
chr10:g.92694703A>G
chrX:g.12720627T>C
chr11:g.70485960T>G
chr14:g.65076405T>C
chr2:g.27130133G>T
chr19:g.18533290T>C
chr5:g.151139381C>T
chr10:g.126464846A>G
chr7:g.29030646delT
chr1:g.149082019T>C
chr7:g.152181559G>C
chr1:g.148533024C>T
chr16:g.53605561C>G
chr11:g.66691339G>A
chr4:g.133150592T>A
chr6:g.53092772G>T
chr12:g.52599074G>T
chr2:g.20006289A>C
chr17:g.41906535C>T
chr6:g.93410716C>A
chr12:g.55965988G>C
chr4:g.112649650G>A
chr8:g.132038824G>T
chr5:g.141235668G>A
chr20:g.4725107_4725108insCC
chr3:g.130093106G>A
chrX:g.66192188G>A
chr1:g.116577378G>A
chr5:g.150080907G>C
chr12:g.23534228T>A
chr16:g.57025746C>A
chr1:g.43958574G>T
chr13:g.113498465G>A
chr3:g.124764509C>G
chr12:g.125076567_125076568insTGTAA
chr8:g.41932177T>A
chr15:g.74620074A>T
chr14:g.76082390G>T
chr17:g.4947128T>A
chr3:g.75737130T>C
chr1:g.3412406C>G
chr4:g.98109253G>T
chr10:g.70095695_70095696insCATCACTGAAAACTAAGGCCACC
chr14:g.61051887T>C
chr2:g.91655504T>G
chr17:g.47838307C>A
chr10:g.110510168G>A
chr4:g.10444914T>A
chr3:g.46925401T>A
chr16:g.66398466A>T
chr10:g.13693944G>C
chr11:g.62526286C>G
chr5:g.141415098G>T
chr3:g.37325828A>C
chr12:g.5971621_5971622insC
chr10:g.20001953G>A
chrX:g.30236847A>C
chr6:g.39072951C>T
chr1:g.156407005A>T
chr1:g.235161313T>G
chr10:g.33226198delTA
chr1:g.32889256G>C
chr17:g.7670664C>A
chr12:g.20901462T>C
chr18:g.627220G>A
chr6:g.146434497G>A
chr5:g.180603253C>T
chr2:g.30568159T>C
chr19:g.50210614delGG
chr2:g.219180113G>C
chr14:g.64282795T>A
chr8:g.100596678G>C
chr13:g.41130495G>T
chr1:g.43578888G>A
chr11:g.101902637G>A
chr4:g.68072321A>C
chr16:g.1455138G>A
chr5:g.141393533G>T
chr11:g.57802059C>T
chr22:g.37665878T>C
chr10:g.128103259G>A
chr17:g.39494626_39494627insA
chr15:g.42451858C>A
chr1:g.38018509G>T
chr17:g.58529237T>A
chr3:g.125552621A>C
chrX:g.85345915G>C
chr7:g.99057453A>G
chr11:g.72013518A>C
chr1:g.110952289A>C
chr15:g.75384338T>C
chr17:g.7673792delG
chr2:g.166036234T>A
chr11:g.33065984A>T
chr1:g.246647693C>A
chr16:g.67992164G>A
chr2:g.129980155T>C
chr17:g.44093692C>G
chr17:g.36103949C>T
chr19:g.39200463A>T
chr14:g.58139395A>G
chr19:g.38287925T>C
chr19:g.51056536C>A
chr20:g.37859943G>C
chr2:g.241223203A>G
chr17:g.38942869C>G
chrX:g.129919478C>A
chr7:g.75813344C>G
chr12:g.1593065C>T
chr1:g.9737548_9737549insCC
chr1:g.148117685A>C
chrX:g.53383246T>G
chr17:g.36587068G>T
chr17:g.48592181T>C
chrX:g.155054645A>G
chr16:g.82035572C>A
chr15:g.28218517T>A
chrX:g.155264195G>A
chr11:g.57554486_57554487insTG
chr15:g.34343074G>C
chr17:g.7670690_7670691insTCAC
chr6:g.31956865A>C
chr7:g.94539029G>C
chr12:g.8837537C>T
chr15:g.76137718A>G
chr1:g.176894601G>A
chr17:g.3198215delCTATTCAAAG
chr17:g.10503116C>A
chr10:g.5924463G>T
chr21:g.43982452A>C
chr19:g.12953083T>C
chr7:g.130367894G>A
chr19:g.52950665C>T
chr21:g.32514896A>G
chr20:g.61998988_61998989insCAGGCGTGGTGGCTCA
chr17:g.62269029G>A
chr6:g.106521314delAGGCTAATCATATTGAAAGTGTTATT
chr17:g.28913108G>A
chr5:g.38964844G>A
chr10:g.62000196_62000197insAAATGAGCACAAAATAAAGTGA
chr19:g.35527958T>C
chr14:g.60713718G>C
chr12:g.125136753C>G
chrX:g.139731657C>A
chrX:g.9873752C>G
chr3:g.48378387delATCTCGCCATCACTATGGATCGGAAAAAAACT
chr2:g.201011435G>C
chr3:g.143985808_143985809insCT
chr10:g.114299273T>C
chr1:g.22784691A>C
chr20:g.62909862G>A
chr4:g.93829790G>A
chr11:g.67609533C>G
chrX:g.12920576G>T
chr3:g.133759215G>T
chr15:g.77133489C>T
chr10:g.95687116C>A
chr1:g.228366842C>T
chr1:g.94897806T>C
chr11:g.75800563T>A
chr2:g.159383668delC
chr1:g.54047382_54047383insTCTTTTGTTAAACATATTGCTTTCAG
chr16:g.13947936C>T
chr7:g.128979050C>A
chr20:g.22582705C>A
chr11:g.32932190_32932191insGATCACAAGGGTAAACCCATTTTTAC
chr1:g.109626335G>T
chr7:g.142065339G>A
chrX:g.154320857G>C
chr16:g.89723192T>A
chrX:g.100296363C>A
chr19:g.16914775C>T
chr2:g.27657615G>C
chr2:g.127288862T>A
chr15:g.51893885T>G
chr1:g.160280171C>T
chr15:g.28655487_28655488insCTGACAA
chr8:g.30106011A>G
chr6:g.116254203C>G
chr10:g.47461614G>A
chr11:g.4082879C>T
chr4:g.8080788C>T
chr17:g.76014992C>A
chr17:g.8148024G>C
chr16:g.25247316A>C
chr17:g.7675077delGGTGGG
chr10:g.102401260G>T
chr17:g.15308665G>A
chr20:g.58840853G>A
chr22:g.39312973C>A
chr17:g.42582737A>G
chr10:g.122514215C>G
chr8:g.6832724A>G
chrX:g.47607016G>T
chr19:g.38392050G>C
chr5:g.141184675C>T
chr2:g.189563716G>T
chr1:g.39764699T>C
chr1:g.31732153G>A
chr17:g.45267683G>T
chr14:g.22052907C>G
chr20:g.62798630T>G
chr8:g.42731901C>T
chr19:g.53941506C>G
chr7:g.48245947G>T
chr11:g.601686A>C
chr19:g.39435891G>C
chr13:g.48412149G>A
chr1:g.40413096G>A
chr10:g.93364048G>A
chr1:g.156672365T>G
chr1:g.241597810G>C
chr6:g.28903801T>A
chr19:g.53166118T>A
chr2:g.178014351G>A
chr5:g.139836996A>G
chr5:g.74685472A>C
chr20:g.49242104G>T
chr1:g.18700652_18700653insATGATTAAAGCCTTTCAGGAAAAT
chr21:g.41467806A>T
chr2:g.151696636C>T
chr9:g.128617647A>C
chr12:g.27798226C>T
chr6:g.151015550G>C
chr8:g.99820085T>A
chr4:g.141231443T>C
chr1:g.193081385C>G
chr19:g.39101310T>C
chr14:g.106410642C>G
chr3:g.146124178C>T
chr10:g.128106238C>T
chr12:g.106318456A>T
chr2:g.85665328G>A
chr8:g.140556226T>A
chr13:g.28037209T>C
chr1:g.113671755G>A
chr8:g.99642181A>C
chr11:g.83224893A>G
chr1:g.165428875A>C
chr5:g.141485406A>T
chr19:g.56663801G>T
chr6:g.43527631T>C
chr3:g.186794724_186794725insACAAATTTTGAAATGTGCTCATGTAAAATTTACA
chr14:g.69953440C>T
chr19:g.7925398C>G
chrX:g.24312757T>A
chr18:g.46821025G>A
chr4:g.93455668G>A
chr17:g.28573497G>A
chr11:g.95026233G>T
chr1:g.197092023G>C
chr7:g.143332816G>A
chr15:g.89625109G>A
chr12:g.8138442G>C
chr5:g.96800959delA
chrX:g.47574050G>A
chr20:g.3035679C>G
chr4:g.186617166T>A
chr15:g.70066167C>A
chr2:g.63622491T>A
chr2:g.119372435C>G
chr4:g.48494282A>G
chr8:g.11838493A>T
chr11:g.110159400A>G
chr1:g.58782102C>T
chrX:g.69529044G>A
chr4:g.87357279C>A
chr2:g.102708364C>G
chr14:g.55175913A>G
chr6:g.83135773G>A
chr1:g.55052689G>C
chr12:g.57517417G>C
chr14:g.74910017G>T
chr2:g.53787368C>T
chr20:g.31721901A>T
chr6:g.89695781T>G
chr8:g.10623154G>T
chr4:g.10443088A>C
chr6:g.154832062G>A
chr15:g.62722378delCCAAAGCCGCAGTGCCCAC
chr9:g.19346083T>C
chr10:g.11920991T>G
chr19:g.18668011C>T
chr8:g.47595834G>A
chr10:g.23008844T>C
chr7:g.128398467C>T
chr8:g.99501752delAAGT
chr11:g.121113170C>T
chr12:g.120303567G>C
chr21:g.46431925C>T
chr3:g.44556955C>G
chr19:g.16203593G>A
chr22:g.23181768C>T
chr12:g.9101513G>A
chr20:g.63559282C>A
chr1:g.152356458T>A
chr4:g.151716020G>T
chr3:g.151416417C>T
chr15:g.24978282C>G
chr7:g.87403153C>T
chr6:g.108664222A>C
chr16:g.20933213T>A
chr6:g.26204880G>A
chr3:g.194360751C>T
chrX:g.67545889G>T
chr6:g.112071388A>G
chr2:g.178720935G>A
chr14:g.22844458T>G
chr7:g.5943433A>C
chr19:g.48913564_48913565insT
chr19:g.16869612C>T
chr10:g.49476303_49476304insCTC
chr7:g.65976041G>A
chr19:g.29674251G>A
chr17:g.74354228C>A
chr19:g.40936502G>A
chr1:g.16646862C>T
chr5:g.141009721C>T
chr20:g.845781C>T
chr4:g.184091147_184091148insT
chr6:g.170537277C>G
chr4:g.127942123C>T
chr5:g.177050725T>C
chr1:g.44740970T>A
chr19:g.16402279G>A
chr20:g.38364650C>A
chr22:g.30339194C>A
chr1:g.23629492C>T
chr4:g.113255774C>T
chr5:g.172897045G>A
chr1:g.91643293A>T
chr11:g.7796624C>T
chr5:g.178120493A>C
chr1:g.11712341G>T
chrX:g.12716299G>A
chr14:g.104942363T>A
chr17:g.46549767C>T
chr11:g.124617382A>T
chr2:g.3545779C>G
chr4:g.52033461G>A
chr17:g.42346684G>C
chr17:g.42572810A>G
chr6:g.152510324G>T
chr20:g.61924448C>T
chr10:g.104315464C>T
chr2:g.228017481T>C
chr4:g.68231336T>A
chr1:g.70249957G>C
chr1:g.153149675C>G
chr5:g.181054241A>T
chr11:g.65379554delCCCAGGAGCTGCAGAGAGACACAGTGGCAGCGGAGTAGGCA
chr2:g.226795917T>G
chr5:g.140850512G>A
chr17:g.34363170G>A
chr19:g.35563450C>G
chr21:g.33818449_33818450insT
chr3:g.94084132T>C
chr20:g.49374414_49374415insGCTC
chr14:g.91272722T>C
chr11:g.33085242_33085243insAAACCAAGAACAATTGTTTTCAGAAAA
chr22:g.39744185T>A
chr2:g.26793286G>T
chrX:g.130071098_130071099insTC
chr7:g.40274552C>T
chr13:g.42209439A>G
chr1:g.159588389A>T
chr5:g.172914810G>T
chr6:g.30627864G>A
chr14:g.79663895G>A
chr3:g.193647179A>T
chr6:g.144462669C>G
chr1:g.153032880T>A
chr1:g.186001382A>G
chr4:g.48228554_48228555insAATCGCATTTTACCACTTTCA
chr20:g.62894084C>T
chr3:g.156291875T>A
chr6:g.89368178G>A
chr15:g.25239869A>C
chr10:g.829590C>T
chr5:g.154823593C>T
chr18:g.198094T>G
chr10:g.126036222G>A
chrX:g.107647748_107647749insT
chr19:g.12940425C>T
chr11:g.120226868T>A
chr21:g.44083302G>A
chr20:g.48637730C>A
chr10:g.52767971A>G
chr16:g.3356571C>T
chr5:g.914481C>T
chr19:g.18080987C>G
chr3:g.38550401_38550402insTTGGCTGGCTGGGCAGGGCCTGCCAGGTTC
chr19:g.51890680T>A
chr7:g.86926903T>C
chr17:g.41802847T>C
chr12:g.47844981G>A
chr6:g.37014034G>C
chr6:g.169240469T>G
chr15:g.65078050_65078051insCATACCTGTAATCCCA
chr9:g.133110320T>C
chr12:g.204695G>T
chr10:g.71761765T>A
chr18:g.21683554_21683555insGGGCAACAGAGTGAGACCCCATCTCTACAAAACAAA
chr1:g.13225321T>G
chr10:g.101579491C>T
chr19:g.1079998G>C
chr4:g.68567897A>G
chr5:g.35646769G>A
chr7:g.105996280T>G
chr12:g.12087372C>G
chr11:g.2146467delA
chr7:g.99434879T>G
chr4:g.121333001G>T
chr10:g.24595739G>C
chr17:g.36595078T>A
chr1:g.159440316C>A
chr7:g.66377669_66377670insT
chr2:g.27327277A>T
chr9:g.35078691G>A
chr2:g.24080892T>C
chr1:g.15565928G>C
chr3:g.112580832C>G
chr6:g.56618631T>C
chr1:g.152353644T>C
chr9:g.18753429G>A
chr10:g.101770504C>T
chr8:g.95269079G>T
chr1:g.114720623C>A
chr8:g.1632960C>G
chr10:g.17771333G>T
chr7:g.38317129G>A
chr1:g.40066250_40066251insCCTTTCCTTTCTTCCATCCTTCATC
chr2:g.29017176C>A
chr2:g.32435574A>C
chr3:g.46374067A>T
chr3:g.13504160A>T
chr3:g.119625138G>T
chr17:g.9857439C>T
chr12:g.7921307A>G
chr11:g.108331390G>C
chr9:g.113360591C>G
chr13:g.52848137C>T
chr7:g.50604345G>C
chr13:g.76885225C>A
chr11:g.5389792T>G
chr8:g.142917204C>G
chr1:g.206116403A>T
chr4:g.103719543G>A
chr3:g.9742060G>T
chr19:g.13153251G>A
chr4:g.168394589_168394590insGAAGAGTAAAGGGTTATGACCAG
chr1:g.19268635G>A
chr11:g.61364365T>A
chr8:g.130884662T>G
chrX:g.154435788T>C
chr1:g.24373707G>A
chr7:g.47882048_47882049insGTTGTCTAGCATAAATAAGATATATATAT
chr7:g.100435439G>C
chr21:g.44960151G>A
chr16:g.3286083G>A
chr15:g.88873973C>T
chr2:g.94829051C>T
chr19:g.51890335A>T
chr11:g.60933611G>A
chr14:g.21476846_21476847insACACCTGTCGGTAAAGACCGAGAGAAAGAATGTGAT
chr17:g.74230915A>C
chr1:g.51294449A>T
chr4:g.150584055C>A
chr6:g.27865762C>G
chr16:g.68822049A>C
chr22:g.30906218C>G
chr1:g.232984536A>G
chr19:g.9381767T>C
chr19:g.46494349G>T
chr5:g.111344071A>T
chr19:g.31277967G>C
chr11:g.7959996G>T
chr1:g.63437107_63437108insAGG
chr12:g.124957028C>G
chr15:g.45150699C>T
chr12:g.323780C>T
chr10:g.1183338G>A
chr16:g.68810235T>G
chr16:g.68684810G>C
chr9:g.133658382C>G
chr8:g.26864202G>C
chr16:g.85102289G>A
chr19:g.14402765G>T
chr22:g.38493732T>A
chr20:g.33038946C>T
chr12:g.53123203C>A
chr8:g.12359242C>T
chr2:g.140536634C>G
chr14:g.94246454A>T
chr2:g.178748407delT
chr18:g.13825958A>T
chr3:g.122415579A>T
chr6:g.119248266A>T
chr10:g.382744C>T
chr17:g.31343008G>T
chr1:g.161052840G>C
chr20:g.54153711C>A
chr17:g.5558718A>G
chr15:g.72752853C>T
chr1:g.89380519A>T
chr17:g.7674948T>A
chr20:g.16749781C>G
chr8:g.72071712T>C
chr3:g.184304026_184304027insAGGGACAG
chr1:g.34761349G>A
chr13:g.99866325C>A
chr19:g.39474292C>G
chr13:g.32536146G>T
chr21:g.10578405G>A
chr17:g.78798428G>A
chr10:g.67823377C>G
chr11:g.55839104C>T
chr12:g.123341021G>A
chr14:g.57244197A>G
chr21:g.44580016C>G
chr7:g.100330523C>G
chr13:g.51934864C>T
chr4:g.54285393T>A
chr4:g.152796491C>T
chr16:g.16173392T>G
chr2:g.201136463C>T
chr15:g.45152443C>G
chrX:g.102749699C>G
chr19:g.17640534G>A
chr10:g.101676411G>C
chr1:g.44412397delT
chr15:g.89195398A>T
chr19:g.12764862C>T
chr17:g.69033781_69033782insTTAATTACTGTTTTAATGTGCTTTTG
chr15:g.61922567G>C
chr13:g.27435574G>A
chr2:g.230910275C>G
chr3:g.9744325A>C
chr17:g.76018135A>T
chr17:g.7673799A>T
chr20:g.13154056C>G
chr1:g.207322568_207322569insT
chr15:g.54623797A>T
chr3:g.53119955C>A
chr16:g.67952347G>T
chr16:g.3591139C>G
chr2:g.178478453T>A
chr19:g.8316598G>A
chr1:g.6385614G>T
chr1:g.2489249C>G
chrX:g.153930163T>A
chr16:g.19517091A>T
chr19:g.41127924T>C
chr8:g.22004003G>A
chr1:g.117092746G>A
chr3:g.42194912_42194913insT
chr2:g.164743614G>A
chr10:g.27249002A>G
chr8:g.37840216C>G
chr13:g.18838561C>T
chr19:g.12703761A>T
chr11:g.3026783C>T
chr19:g.50403185T>C
chr1:g.152353689_152353690insC
chr6:g.30952996G>A
chr5:g.67182927A>T
chr17:g.3725197C>A
chr6:g.47673416G>C
chr17:g.60043757C>T
chr1:g.31741865G>A
chr2:g.43224180delGCTCGGTCGG
chr1:g.156879196T>G
chr1:g.173992957T>A
chr11:g.121567017C>T
chr11:g.59182179C>G
chr19:g.37388909C>T
chr6:g.43220564C>A
chr14:g.70733283_70733284insA
chr17:g.82738466A>G
chr19:g.13778186delG
chr16:g.25246784T>A
chr4:g.109463147T>C
chr7:g.99344481A>C
chr14:g.77478613G>A
chr2:g.237366011C>A
chr4:g.89248677_89248678insCTTGTTAAGTGGTATAGCATCTTAATATTTTAAAAG
chr11:g.94401230C>T
chr17:g.47975635T>A
chr15:g.25180558A>T
chr11:g.12294093G>A
chr19:g.58338952A>G
chr9:g.114624406A>C
chr17:g.1648388T>C
chr5:g.170383802C>T
chrX:g.2925689G>A
chr19:g.41766263delC
chr19:g.45025642A>G
chr5:g.103136769_103136770insTTA
chr1:g.84956433A>G
chrX:g.38161000C>A
chr4:g.3343003T>C
chr15:g.81334737T>G
chr12:g.20654009_20654010insACTGCAGCCT
chr7:g.6737461C>A
chr17:g.44148977C>G
chr15:g.101806047A>T
chr10:g.119796750C>G
chr1:g.239907960T>A
chr12:g.110440388G>T
chr17:g.43831886G>C
chr1:g.121568190C>T
chr3:g.8881379C>G
chr2:g.110169826C>G
chr19:g.51366325A>C
chr18:g.54598203A>G
chr9:g.84279280T>A
chr11:g.57333462A>G
chr13:g.98390850A>T
chr11:g.5352231C>A
chr10:g.54317283C>G
chr15:g.90906394G>T
chr9:g.129720705A>C
chr18:g.44951290G>T
chr3:g.195863474T>A
chr2:g.90005570A>T
chr15:g.60448078A>G
chr19:g.5832135G>C
chr11:g.66605256G>C
chr15:g.68153609delATCTTGTAAAACA
chr5:g.434550C>T
chr16:g.89791951G>A
chr3:g.69181353T>A
chr6:g.33659119_33659120insT
chr2:g.190437166G>T
chr12:g.52847932C>A
chr1:g.169367861G>A
chr9:g.133100393G>T
chr2:g.27207302delAGATGTGTGC
chr2:g.162504516G>T
chr3:g.44557149G>T
chrX:g.120253991T>C
chr10:g.122083971G>T
chr3:g.109330461G>T
chr22:g.26496094T>A
chr2:g.94815693C>T
chr1:g.145900911G>T
chr11:g.62523752G>A
chrX:g.50376080A>C
chr19:g.44327691T>C
chr17:g.42845418C>G
chr16:g.24540570T>C
chr1:g.167399278C>T
chr16:g.74672450T>A
chr10:g.101827152_101827153insC
chr4:g.119498521T>C
chr9:g.126833284G>T
chr17:g.63881494A>G
chr11:g.106077883A>G
chr22:g.38699828C>T
chr9:g.92718591G>A
chrX:g.71100798_71100799insC
chr17:g.76735855T>C
chr8:g.2052222T>A
chr1:g.27306339G>A
chr10:g.419107C>G
chr8:g.140547525C>G
chr14:g.99907699_99907700insG
chr17:g.82582915C>A
chr1:g.94201966T>C
chr18:g.21536127A>C
chr7:g.27100815G>C
chrX:g.7350049C>T
chr8:g.38392781C>G
chr11:g.56989312T>C
chr17:g.15978102A>G
chr6:g.32842702T>C
chr5:g.141404968G>T
chr11:g.33335759T>G
chr5:g.24487407C>G
chr17:g.42130527G>C
chr1:g.1754264G>C
chr7:g.2250942_2250943insGG
chr12:g.55719559_55719560insAAATTATGAGCCCTGATTCTTGG
chr22:g.50574515A>T
chr19:g.5214467T>A
chr2:g.219035463A>T
chr2:g.85551567A>C
chr5:g.141178071C>G
chr11:g.7000689T>A
chr4:g.70234148T>G
chr2:g.174562586T>C
chr12:g.6537376G>C
chr2:g.188998286T>C
chr15:g.41825271C>T
chr10:g.96322717C>A
chr22:g.22550174C>T
chr1:g.43660348delG
chr12:g.53382641C>T
chr1:g.46055848_46055849insACCTCTGCCTCCCAGG
chr2:g.178757662C>A
chr1:g.156266151A>C
chr19:g.1008742G>A
chr21:g.29326546C>A
chr15:g.93002308G>T
chr11:g.66334000G>A
chr6:g.160247271_160247272insCTGTATCCACTATTTTAGTATCATATGGAATA
chr7:g.123953790T>C
chr14:g.39247296C>T
chr7:g.143876246G>T
chr14:g.104940310A>C
chr14:g.102005125T>G
chr7:g.88210917_88210918insCCATTCAGTACAGCCCAGA
chr12:g.49265129T>C
chr16:g.67371155C>T
chr9:g.33624638G>A
chr3:g.39265940G>T
chr11:g.72136029G>A
chr1:g.77576122A>G
chr17:g.27597290A>G
chr2:g.203428520C>A
chr6:g.25918547delG
chr1:g.109203185T>C
chr7:g.75559743G>A
chr1:g.233258961_233258962insACATGCAAAGTGCTTAGAACACTGCC
chr18:g.9281055A>T
chr19:g.37635697_37635698insAGTTCTGAGTAACGACGAAAGAACTT
chr6:g.160027242G>A
chr2:g.48963155delCTGTGAGGTAGATGTGGATATAGCAG
chr17:g.56891698G>A
chr22:g.39512432A>C
chr18:g.14105530T>C
chr1:g.151002710T>G
chr20:g.32437280G>T
chr5:g.140668967C>G
chr1:g.155962126G>A
chr1:g.21576605G>T
chr14:g.64786826G>T
chrX:g.153906353T>C
chr10:g.132417118C>T
chr17:g.80084874G>T
chr1:g.169609555C>A
chr21:g.31663822C>A
chr1:g.151316119C>G
chr2:g.196319828G>A
chr3:g.4627789A>C
chr17:g.1883812G>A
chr2:g.27059306C>T
chr1:g.169421531A>T
chr18:g.46569633G>A
chr5:g.138424257T>C
chr17:g.78449516C>G
chr4:g.53496151T>C
chr8:g.132710644G>C
chr8:g.88041586T>C
chr7:g.81729780C>A
chr19:g.311876C>G
chr3:g.13496771C>T
chr19:g.50878891G>A
chr11:g.58422677C>A
chr17:g.78049123A>T
chr1:g.48232025C>A
chrX:g.103083625G>T
chr1:g.41582191T>C
chr1:g.68183608G>A
chr13:g.83879536C>T
chr1:g.200120913C>T
chr3:g.115676074C>G
chr19:g.39840658C>A
chr13:g.25097059G>C
chr17:g.11905662G>T
chr11:g.78669535C>T
chr2:g.161942813T>G
chr1:g.89188664A>G
chr15:g.85581148A>G
chr22:g.26443190T>A
chr3:g.192799368C>G
chr4:g.100187681G>A
chr4:g.3214128G>A
chr8:g.53879331_53879332insA
chrX:g.105909251A>T
chr4:g.6598227T>A
chr2:g.29320760delCCTGGAACCGGGCATCCTTTAGGGTCCTGA
chr2:g.218389943T>G
chrX:g.19003019G>A
chr7:g.18593958_18593959insT
chr1:g.41582225A>G
chr13:g.30969047G>A
chr8:g.1565895G>A
chr2:g.85327058C>T
chr3:g.48587058C>G
chr16:g.3966248T>C
chr17:g.44741367_44741368insATGTATTAATTTAACCTAGAAAGG
chr14:g.32093700A>C
chr19:g.54311657T>C
chr6:g.12123845C>T
chr19:g.55247056C>A
chr17:g.3277915A>C
chr19:g.40395945T>C
chr9:g.112454108C>G
chr21:g.46272658A>C
chr7:g.158911659G>C
chr2:g.233618424C>T
chr15:g.75384412A>T
chr4:g.97558931delC
chr17:g.39139746C>A
chr12:g.95533236C>G
chr3:g.11883579G>T
chr8:g.55102781T>A
chr11:g.47848294G>A
chr13:g.113309755C>T
chr1:g.91976334T>G
chr5:g.176322367A>C
chr19:g.15618064T>G
chr19:g.24128315C>G
chr2:g.61208970T>C
chr2:g.21002624G>C
chr1:g.54623312G>A
chr1:g.15942663G>C
chr12:g.15889928C>A
chr8:g.103910431G>C
chr7:g.101040965C>A
chr1:g.41046568T>C
chr1:g.36320475_36320476insC
chr5:g.157490393C>A
chr1:g.247424502G>A
chr22:g.43046427G>A
chr21:g.26934737delAGCAAACAGTTACCTACA
chr11:g.9283338G>T
chr11:g.33598960delC
chrX:g.85270894A>T
chr9:g.105705612C>A
chr2:g.178503758A>G
chr7:g.34153806T>C
chr6:g.26459523C>G
chr17:g.67056362T>C
chr1:g.43671666_43671667insCCCATTCCCCGCCCATGTTC
chr15:g.69360003G>T
chr11:g.85734428C>G
chr19:g.55388076G>C
chr2:g.237769982T>G
chr2:g.127505738_127505739insG
chr19:g.57233532G>C
chr12:g.96247068C>T
chr4:g.163351535A>T
chr10:g.62092617G>A
chr12:g.6557359C>T
chr7:g.150857883C>T
chr18:g.198062G>A
chr3:g.160437776C>G
chr3:g.52516388_52516389insC
chr19:g.47353185A>T
chr1:g.153688085C>A
chr15:g.75019927C>T
chr11:g.77701222T>C
chr6:g.10873879C>A
chr2:g.10426732T>A
chr3:g.58863759_58863760insAATGCAATTAA
chr1:g.220025145T>C
chr20:g.1479966delA
chr11:g.77878842T>A
chr11:g.63908951G>A
chr1:g.154324462delGCTGGAGTGTAAGCTATGATTA
chr20:g.46053607C>T
chr2:g.74432565G>A
chr19:g.40588688C>T
chr12:g.5807313G>A
chr7:g.100063789T>A
chr14:g.73713010G>A
chr1:g.169862775A>T
chr1:g.8344020G>A
chr11:g.3824987A>T
chr18:g.5406871G>A
chr11:g.128810478G>A
chr6:g.112254129delGCCAGGCTGAGCTCAAA
chr11:g.119372819G>A
chr12:g.101737275G>A
chr11:g.6623386T>C
chr10:g.7717763delCTGGACGG
chr1:g.24057257T>C
chr6:g.32950787delCC
chr17:g.80138228C>T
chr22:g.27854860T>A
chr19:g.16529888delTGATGAGGGTGGCC
chr13:g.48465074G>C
chr19:g.50365660C>G
chr16:g.66966830G>T
chr2:g.15218889G>C
chr14:g.95466072G>A
chr8:g.56301558C>T
chr2:g.135724310delTTCGCCT
chr2:g.166472433A>T
chr21:g.14163485T>A
chr2:g.109347715C>T
chr16:g.4262324C>A
chr15:g.90940428G>A
chr16:g.24568856A>C
chr1:g.15874304C>G
chrX:g.49251726C>A
chr1:g.201848450G>A
chr12:g.52568234G>A
chr16:g.15838108T>A
chr22:g.37570580delA
chr19:g.39827524_39827525insGG
chr19:g.44522820C>G
chr22:g.30646829T>C
chr12:g.124378305_124378306insTACAAAGTCAAAAGTAGTG
chr4:g.121932726C>T
chr7:g.45101267_45101268insT
chr17:g.74617338C>T
chr18:g.21849251G>C
chr14:g.52600223C>A
chr2:g.177551796A>T
chr6:g.27132428G>C
chr19:g.56027717_56027718insAGCTCTGCAAAGACTGGGCTGAGAAGCAGCCT
chr19:g.18316060_18316061insCTGATCTGCCCGCCTCGGCCTCCCAAAGTGCT
chr14:g.23638984G>C
chr1:g.46034896_46034897insCC
chr20:g.38581224C>T
chr9:g.98128245_98128246insG
chr19:g.45227667_45227668insG
chr15:g.89200747C>G
chrX:g.54446273G>C
chr1:g.174957894G>C
chr4:g.88075560A>T
chr15:g.64690450A>C
chr15:g.27983403G>C
chr11:g.4545558A>G
chr10:g.34269868G>C
chr17:g.788067G>A
chr20:g.44621032C>T
chr7:g.79007099T>G
chr19:g.9986338G>C
chr13:g.42606859C>G
chr1:g.179368809A>T
chr9:g.33998845C>G
chr3:g.183297284T>A
chr1:g.15932508T>C
chr12:g.101673611_101673612insA
chr17:g.35148431G>A
chr5:g.113542499delTAGTGG
chr5:g.180992948C>T
chr8:g.41542182G>C
chr6:g.73395040C>T
chr2:g.134983209C>T
chr1:g.16403782A>C
chr3:g.44721978G>A
chr1:g.17070133G>T
chr3:g.67529100G>T
chr1:g.149929755A>G
chr2:g.71660567delCTTACATCAAGAT
chr3:g.99930812_99930813insTATTGCTACTGATGCATG
chr9:g.72360729C>G
chr9:g.27524732C>T
chr3:g.161250813delATGAAGGAGCACCTCGA
chr5:g.132897172_132897173insGATTATAACAATACGGGGAGTACATATCCAA
chr3:g.45901523G>T
chr15:g.79899061C>T
chr12:g.51913585G>T
chr10:g.25024441T>C
chrX:g.103586909G>A
chr10:g.122506816delGCGAGGCGGCAAAGAGCTGGG
chr19:g.44476754G>A
chr16:g.15748102G>A
chr16:g.68231284C>G
chr21:g.34449251G>T
chr6:g.112172629G>A
chr10:g.47325733C>T
chr1:g.1963781C>A
chr14:g.51000775C>G
chr17:g.76725501G>C
chr6:g.33443472G>A
chr2:g.178777235T>G
chr15:g.66558036_66558037insA
chr15:g.73116618T>C
chr17:g.40488638_40488639insGCTTGGCATTTAAGGCCTTTCACAATCTGGT
chr3:g.46545134T>A
chr2:g.195934719T>C
chr17:g.1675246T>C
chr2:g.225408974G>A
chr6:g.70217040C>T
chr1:g.245540923G>C
chr13:g.38691406A>C
chr8:g.98148997G>T
chr19:g.19539681G>C
chr20:g.38755097delC
chr3:g.37340143G>A
chr3:g.184192601G>T
chr6:g.34590445G>C
chr20:g.5773011A>C
chr6:g.152350269C>A
chr5:g.42719454T>A
chr5:g.57262630delA
chr4:g.93772394_93772395insGTCGTCATCTGTGCACAAGCTA
chr2:g.154242885G>A
chr2:g.73249848G>A
chr1:g.116399157C>T
chr7:g.121440933C>T
chr17:g.7757106C>G
chr2:g.27277999A>C
chr3:g.58123263delC
chr1:g.235182393C>G
chr7:g.147903706C>T
chr8:g.104497212delT
chr2:g.219549098A>G
chr8:g.144932193A>T
chr2:g.168906716T>C
chr6:g.9939345T>A
chr15:g.90904168C>T
chr15:g.74750061G>A
chr20:g.25479111C>T
chrX:g.102141341T>C
chr2:g.171791582T>G
chr15:g.74720509G>T
chr7:g.111778339C>A
chr14:g.33560153G>A
chr4:g.127794090T>C
chr4:g.7041550_7041551insCCTTGCCCATTCGCTGAACTTTTAAACCCTCCTACA
chr22:g.20993675C>A
chr4:g.15538090G>A
chr2:g.86987289T>A
chr17:g.47745418C>T
chr6:g.54326901C>A
chr11:g.46682129T>G
chr9:g.114402833C>A
chr14:g.62981050delT
chr3:g.39407736C>G
chr2:g.71553874G>T
chr2:g.108288749T>C
chrX:g.154360443C>A
chr17:g.78463002G>A
chr15:g.68725951C>T
chr14:g.63686380G>A
chr15:g.79001690G>A
chr2:g.89937412G>A
chr10:g.102368439C>G
chrX:g.46860080C>T
chr15:g.21294432T>G
chr8:g.112492652G>T
chr15:g.22427579T>C
chr17:g.41622480C>A
chr20:g.57523840A>T
chr3:g.33373920C>A
chr17:g.80212203C>A
chr16:g.58518167T>C
chr3:g.58077141G>C
chr10:g.73154368C>T
chrX:g.34943908C>T
chr11:g.63976361C>T
chr10:g.70213539A>T
chr12:g.120727064T>C
chr17:g.3688032C>G
chr22:g.31135666G>C
chr15:g.43609300G>T
chr7:g.154946470G>A
chr11:g.12862288A>T
chr2:g.228017681A>G
chr6:g.33365742T>C
chr1:g.117025719G>A
chr6:g.24596039T>C
chr19:g.10310466G>T
chr5:g.6754937A>T
chr22:g.22308761A>G
chr5:g.865556A>C
chr1:g.9936567_9936568insAGG
chr4:g.125487444A>T
chr8:g.60852148A>C
chr3:g.52806383G>A
chr13:g.24447172C>T
chr19:g.46470833G>T
chr6:g.33409677_33409678insT
chr19:g.8511493C>T
chr5:g.123023989G>A
chr9:g.81994245T>A
chr17:g.42162287A>G
chr11:g.66557915G>T
chr22:g.29678227C>T
chr16:g.84195633A>C
chr2:g.164695181C>T
chr7:g.100091831A>T
chr15:g.81292947C>G
chr1:g.155479664delCT
chr4:g.5331308C>T
chr14:g.55351339C>A
chr7:g.10938137_10938138insGGGTTTAC
chr1:g.32867800C>A
chr15:g.89215213G>T
chr22:g.19221952T>C
chr9:g.35721708G>C
chr17:g.38343126C>A
chr14:g.19747494delCTGCAGCTATTTCTCTTCTTA
chr6:g.30491295G>A
chrX:g.53409133_53409134insTGCTTTTTTAAACCTCTCC
chr22:g.30637024C>G
chr15:g.74801996G>C
chr11:g.123943659G>A
chr1:g.159919367A>C
chr5:g.132485690T>C
chr3:g.49531660C>T
chr5:g.83537429T>A
chr2:g.218488384C>T
chr22:g.22306808delC
chr8:g.99115790T>C
chr17:g.7247145A>T
chr11:g.70433647A>C
chr11:g.118401646G>T
chr7:g.151023173G>A
chr5:g.83519893C>T
chr20:g.13117612A>T
chr8:g.30846267G>T
chr15:g.68141953C>T
chr10:g.100194450G>A
chr6:g.132728774A>C
chr3:g.15257132C>A
chr6:g.56639308A>G
chr6:g.43339009G>A
[truncated: 8,000 more rows]

## Sheet: PRAD
chr17:g.49619070A>C
chr17:g.49619064A>C
chr17:g.49619063A>C
chr17:g.7674220C>T
chr10:g.45827364T>G
chr17:g.49619282A>C
chr17:g.7674230C>T
chr17:g.49619062G>C
chr3:g.179218294G>A
chr16:g.29485611C>G
chr1:g.145578886T>C
chr17:g.49619062G>T
chr11:g.533874T>C
chr17:g.7675125A>G
chr17:g.41097785G>A
chr14:g.37592018delTCTCGA
chrX:g.71129408C>T
chr12:g.120996320C>T
chr4:g.9239143C>T
chr3:g.41224633A>G
chr1:g.247758032C>T
chr17:g.49619281A>C
chr10:g.71784923C>T
chr7:g.152148608T>C
chr14:g.50905510G>A
chr11:g.59153100_59153101insA
chrX:g.12885948C>T
chr11:g.118898594C>T
chr6:g.123279056G>A
chr17:g.49619326T>G
chr2:g.208248389G>A
chr2:g.264886G>A
chr4:g.3132832C>T
chr2:g.95888098G>T
chr17:g.7675191A>C
chrX:g.71129405G>C
chr11:g.55638716G>A
chr3:g.123707918G>A
chr15:g.74410909G>A
chr17:g.7674248T>C
chr17:g.49619326T>C
chr16:g.30506836C>T
chr11:g.55994188G>A
chr12:g.125654192G>A
chr4:g.61948152G>A
chr8:g.55523523G>A
chr17:g.7673784C>T
chr20:g.24584910C>T
chr17:g.74740827C>T
chr11:g.124030283G>A
chr1:g.167398066G>A
chr1:g.75932031G>A
chr17:g.49619327A>T
chr19:g.38367744C>T
chr3:g.169102087C>T
chr7:g.31823230C>T
chr13:g.114291736delA
chr3:g.49375525A>C
chr10:g.71732021G>A
chr17:g.49619070A>G
chr20:g.1980549C>T
chr14:g.64951083G>A
chr12:g.123918742C>T
chr18:g.3879237C>T
chr17:g.7673776G>A
chr11:g.68261811G>A
chr17:g.49619069C>A
chr22:g.24225283C>T
chr15:g.101759775G>T
chrX:g.34943721C>T
chr8:g.2096254_2096255insTCCCA
chr11:g.3666177C>T
chr14:g.96264025G>C
chr10:g.105217019C>T
chr15:g.101759755C>G
chr16:g.75478573C>T
chr7:g.140781602C>G
chr3:g.2902986C>T
chr5:g.153811067C>T
chr6:g.125759535C>T
chr8:g.72061690C>T
chr17:g.7675088C>T
chr3:g.179234297A>G
chr19:g.54143151G>A
chr2:g.224506991A>C
chr5:g.141173549C>T
chr16:g.84196231G>A
chr6:g.151365536G>A
chr14:g.104780214C>T
chr17:g.49619281A>G
chr17:g.7674904delTC
chr7:g.130289644G>A
chr17:g.4539347A>T
chr6:g.26423043C>T
chr5:g.153698985G>A
chr1:g.158623056C>T
chr16:g.30397989delC
chr17:g.49619064A>T
chrX:g.148955835G>A
chr11:g.55665389G>A
chr22:g.44189152G>A
chrX:g.100407415G>A
chr3:g.187199742A>C
chr15:g.48152148delT
chr8:g.42755997G>T
chr12:g.52648217C>T
chr11:g.117439355G>C
chr19:g.35500134C>T
chrX:g.71251177C>A
chr2:g.127505180C>T
chr19:g.8548090G>A
chr11:g.33568186C>T
chr17:g.1011954G>A
chr2:g.197646550C>T
chr9:g.132889961C>T
chr17:g.7234228C>T
chr11:g.18721918G>A
chr17:g.81569035T>C
chr16:g.75634250C>T
chr3:g.51639491G>A
chr9:g.4604231T>G
chr21:g.29555217C>T
chr14:g.104106827T>C
chr16:g.563342G>A
chr11:g.61728931G>A
chr11:g.129931055C>T
chr6:g.30659793C>T
chr21:g.44325962G>A
chr1:g.16608746G>T
chr20:g.36916768C>T
chr15:g.78054152C>A
chr17:g.49619063A>G
chr11:g.72014481G>A
chr11:g.64804812C>T
chr11:g.33107948T>A
chr14:g.37592026A>T
chr8:g.41539987_41539988insATTCTCTCTTTTTTGTTTTGTTTTGTTTTGA
chr9:g.137279023C>T
chr17:g.61780893G>A
chr19:g.46495153G>A
chr7:g.82845296C>T
chr17:g.53823694C>T
chrX:g.154465973G>A
chr5:g.141052178C>T
chr15:g.78294877delA
chr1:g.237784247G>A
chr3:g.88156079T>C
chr6:g.162814202C>T
chr14:g.92004220C>A
chr10:g.86206445C>T
chrX:g.17731989delCCAACAG
chr19:g.2043568C>T
chr1:g.151580997G>A
chrX:g.100988487C>G
chr15:g.77614146G>A
chr11:g.123754148A>C
chr3:g.139539475delAC
chr19:g.9342561A>G
chr7:g.23167848delTG
chr12:g.47865145C>T
chr3:g.193333856G>A
chr4:g.26620616T>C
chr2:g.178559479G>A
chr2:g.102445270G>A
chr3:g.46449915C>A
chr14:g.33950220G>A
chrX:g.148652045C>A
chr14:g.85623090G>A
chr2:g.232894741delC
chr7:g.87166525delATAAAAGGCTT
chr1:g.53461552G>A
chr19:g.41238544C>T
chr11:g.125994375A>G
chr1:g.44828078G>A
chr14:g.73493160delA
chr12:g.56454360C>T
chr22:g.20729711C>A
chr10:g.133129431T>C
chr17:g.56449095C>T
chr16:g.4260591_4260592insG
chr4:g.154586042T>G
chr11:g.11892018G>A
chr3:g.49804720C>T
chr1:g.227924293C>T
chr1:g.26045094A>G
chr1:g.151779120C>G
chr7:g.93134429G>A
chr5:g.148433449C>T
chr19:g.4792965C>T
chr4:g.139517965G>T
chr9:g.74762288A>C
chr1:g.101239544C>T
chr15:g.84016409G>A
chr11:g.133929752C>T
chr6:g.162201231C>A
chr22:g.19981674C>A
chr11:g.101062675C>T
chr19:g.14088415G>A
chr14:g.74067467C>T
chr17:g.61683572C>A
chr6:g.151349433G>A
chr4:g.47453210G>A
chr15:g.22427705G>A
chr16:g.3249469G>A
chr20:g.2794218A>G
chr8:g.123183168C>A
chr22:g.19068218G>A
chr20:g.2462573C>T
chr12:g.15956972C>T
chr14:g.77251800G>A
chr8:g.116942714G>A
chr17:g.34637604C>A
chr2:g.176100335G>A
chrX:g.111196488C>T
chr3:g.52378669C>A
chr2:g.84573480C>T
chr1:g.181756031C>T
chr19:g.45786130delG
chr9:g.96392417C>T
chr8:g.100141790C>T
chr3:g.139020162C>T
chr3:g.112639883C>T
chr9:g.136419098G>A
chr18:g.260304_260305insAGATCGGAAGAG
chr22:g.40773984T>C
chr4:g.5563025G>A
chr15:g.50929113A>C
chr19:g.11193937T>C
chr10:g.24872025G>A
chr16:g.29873307G>A
chr11:g.17736374C>T
chr19:g.44707890G>A
chr15:g.74043163C>T
chr17:g.35908613G>A
chr17:g.42660174G>A
chr2:g.100990828C>T
chr8:g.140557149G>A
chr9:g.78300649C>T
chr14:g.55382118G>A
chr19:g.8109725G>T
chr8:g.47898474G>A
chr16:g.574509C>T
chr10:g.102657213G>A
chrX:g.123627700T>C
chrX:g.108734331C>G
chr9:g.123370429T>A
chr16:g.67647877C>A
chr10:g.73517564C>T
chr17:g.76574393C>T
chr3:g.132446551G>T
chr7:g.18935883G>T
chr1:g.114674855G>A
chr1:g.16400820C>A
chr16:g.57769902C>A
chr11:g.1245886G>A
chr1:g.1212061delG
chr1:g.83942507G>A
chr8:g.70733853T>C
chr2:g.44320363C>G
chr14:g.37591985T>A
chr8:g.47712839A>C
chr1:g.203818645C>G
chr1:g.212859099T>G
chr19:g.12897817C>T
chr19:g.41391849C>T
chr11:g.8921397C>T
chr6:g.41806330G>A
chr16:g.304308C>T
chr14:g.74555523T>C
chr11:g.106939757C>T
chr8:g.117521029C>A
chr10:g.31520550A>G
chr20:g.34742093C>T
chr11:g.72709888G>A
chr15:g.73323809C>A
chr6:g.32953050A>T
chr17:g.41838000C>T
chr6:g.43519718G>A
chr11:g.62527087G>A
chr19:g.36103198C>T
chr3:g.195867643C>A
chr7:g.143264138G>A
chr2:g.80303418C>T
chr6:g.90008799A>T
chr5:g.57482119G>A
chr14:g.102975883C>G
chr1:g.45655247G>A
chr16:g.53209485C>A
chr8:g.27776413T>C
chr18:g.50243088T>C
chr16:g.71389787C>T
chr6:g.28259749G>A
chr1:g.234309201T>G
chr4:g.75596282G>T
chr10:g.43102520C>A
chr6:g.127475767G>A
chr4:g.54272451C>T
chr7:g.103483701T>A
chr14:g.77442636G>A
chr19:g.40322322C>A
chr20:g.51791721G>A
chr19:g.18664263C>T
chr2:g.97113772C>A
chr6:g.42746065G>A
chr10:g.26273692C>T
chr2:g.86478220C>T
chr20:g.38213153delG
chr18:g.70059880C>T
chr17:g.2292874C>T
chr22:g.37206946G>A
chr11:g.59422259G>T
chr16:g.89961840C>G
chr18:g.56879987T>C
chr16:g.67879968C>T
chr1:g.2487702G>A
chr3:g.14520472C>G
chrX:g.69162049G>A
chr2:g.10912849C>T
chr10:g.128082915G>A
chr5:g.148125751T>C
chr15:g.83267028C>T
chr3:g.52516997C>T
chr1:g.235181975delCACTGGGTGAACAACTCTCCTCTTCAGC
chr5:g.141158231C>T
chr19:g.52322503G>A
chr5:g.103552321delT
chr19:g.55200378G>A
chr15:g.83264496A>T
chr17:g.7939585C>T
chr22:g.20116898C>T
chr8:g.37841413G>A
chr2:g.119372300_119372301insA
chr7:g.72828102G>T
chr8:g.56167169G>A
chr12:g.88174688T>C
chr9:g.110785684G>A
chr12:g.12718270T>G
chr4:g.83319416C>T
chr5:g.141157498C>T
chrX:g.30219278A>G
chr1:g.44626310C>A
chr1:g.161213702C>T
chr6:g.127813589G>A
chr17:g.67024913C>T
chr10:g.99611325G>A
chr14:g.50726044G>A
chr19:g.21375885G>A
chr19:g.47757029G>A
chr7:g.99011201G>A
chr19:g.44060556G>A
chr4:g.71447674G>A
chr20:g.3697936G>A
chrX:g.108606758C>T
chr3:g.48586151C>T
chr2:g.162423506C>T
chr13:g.38689437G>A
chr14:g.101986372G>A
chr10:g.89418189C>T
chr8:g.101369269G>A
chr2:g.38298289C>T
chr1:g.228022790C>A
chr12:g.132045883C>A
chr5:g.131463971T>C
chr16:g.57462729C>T
chr17:g.38322613delA
chr17:g.63488986C>T
chr14:g.75047634_75047635insT
chr14:g.20474826C>T
chrX:g.10090770G>A
chr17:g.4104700C>T
chr12:g.56351358G>A
chr5:g.163483322G>A
chr11:g.65634195G>A
chr17:g.39710119G>A
chr14:g.104951766C>T
chr5:g.140662409T>C
chr19:g.51994385G>A
chr2:g.195680537A>G
chr3:g.187229873C>T
chr9:g.127407263G>A
chr3:g.105367480A>C
chr6:g.85536848T>A
chr20:g.36194323G>A
chr7:g.93131188C>T
chr16:g.67230476G>A
chr4:g.184091147_184091148insT
chr6:g.83119761C>T
chr19:g.16896203G>T
chr1:g.100990585G>A
chr9:g.32543934A>C
chr20:g.3699364delG
chr14:g.93542560T>A
chr2:g.177231837T>C
chr14:g.58364419delA
chr9:g.131515440delC
chr20:g.34999249G>C
chr1:g.110226069G>A
chr11:g.7796624C>T
chr19:g.11416998C>A
chr1:g.173972628_173972629insTA
chr11:g.22376601A>T
chr5:g.55917146G>T
chr12:g.260007G>A
chr4:g.93422890C>T
chrX:g.148003303_148003304insT
chr2:g.1496032C>T
chr19:g.4310273G>A
chr5:g.132312158C>T
chr3:g.105524534G>T
chrX:g.155022627delG
chr15:g.22542978C>A
chr18:g.3102502G>A
chr5:g.69607134G>T
chr4:g.56810133G>A
chr6:g.87016194G>A
chr7:g.135628085G>A
chr18:g.21768707C>T
chr6:g.43058008A>G
chr5:g.140835919G>T
chr9:g.68303990C>T
chr11:g.994173G>A
chr4:g.71758150T>C
chr1:g.243165527T>A
chr17:g.18323074C>T
chr4:g.5640639G>A
chr3:g.72379345T>C
chr9:g.127867963C>T
chr12:g.45357336T>C
chr15:g.40020979A>G
chr15:g.60627321C>T
chr9:g.77425711C>T
chr5:g.177403535G>A
chr1:g.235780927G>A
chr3:g.49660721G>A
chr7:g.73697862C>G
chr10:g.122598872G>A
chr9:g.110668961C>A
chr14:g.21941448G>A
chr8:g.134600505G>A
chr1:g.155236368G>A
chr19:g.18202603C>T
chr19:g.5135479G>A
chr19:g.55912699G>A
chr9:g.135818566C>T
chr6:g.84736985G>A
chr1:g.160486696C>T
chr16:g.31061301G>T
chr19:g.14766361C>T
chr2:g.231509321C>T
chr3:g.42530877C>T
chr1:g.64629474C>T
chr13:g.27089909A>C
chr8:g.38163604C>T
chr22:g.23181808A>G
chr7:g.76003805G>A
chr4:g.108033181G>A
chr14:g.93183569T>C
chr2:g.178727623A>G
chr10:g.91993724G>T
chr7:g.54757570A>G
chr15:g.20457714A>G
chr15:g.52610068A>C
chr14:g.104955538G>A
chr19:g.45259029C>T
chr12:g.130412699A>G
chr5:g.112840210C>G
chr1:g.151043699C>T
chr19:g.4792678C>A
chr3:g.149167968C>A
chr19:g.15464076T>C
chr2:g.208481096G>A
chr16:g.2111024G>A
chr19:g.50697659G>A
chr11:g.78213795C>G
chr1:g.114719619G>A
chr17:g.81704349delC
chr9:g.39357145G>A
chr3:g.186677072C>T
chrX:g.116462792C>T
chrX:g.37009302C>T
chr12:g.25204322C>T
chr15:g.52372203C>T
chr19:g.9986332C>A
chr8:g.61579289A>C
chr17:g.73169695C>G
chr19:g.17807986C>T
chr4:g.157332870C>T
chr15:g.84802460G>T
chr8:g.144311187C>T
chr16:g.5008604C>T
chr1:g.29312556G>C
chr19:g.56789872C>T
chr1:g.197907185A>C
chr18:g.59338930C>T
chr15:g.80514366G>C
chr2:g.147927267delGT
chr19:g.46470721C>A
chr15:g.90497338C>T
chr7:g.73574105T>A
chr14:g.59603235G>A
chr3:g.126988846G>A
chr5:g.169588532A>T
chr12:g.44607200T>C
chr15:g.61920302A>T
chr2:g.105242434C>T
chr1:g.177280790G>T
chr1:g.23362060G>A
chr7:g.102283068C>T
chr9:g.131159425G>A
chr20:g.41533518T>C
chr17:g.75733543G>A
chr13:g.19782650delG
chr7:g.98223165C>T
chr22:g.26292457C>A
chr12:g.10598112A>C
chr15:g.73949541G>A
chr1:g.17623019G>T
chr8:g.37753485G>C
chr6:g.80042193delA
chrX:g.1288873A>C
chr16:g.31132533A>T
chr1:g.155343738G>A
chr3:g.122407342G>A
chr3:g.128097454C>T
chr7:g.79453053T>C
chr10:g.106672912G>A
chr19:g.681555G>A
chr15:g.53722900C>T
chr1:g.176888089G>A
chr19:g.54274794G>A
chr4:g.157336460C>T
chr14:g.21321968G>T
chr19:g.10287708C>T
chr11:g.65044302G>C
chr1:g.40988539delA
chr2:g.167243052C>G
chr7:g.100106710C>T
chr1:g.145682541C>G
chr14:g.67766267C>T
chr15:g.28238153C>T
chr4:g.103658272A>C
chr9:g.136831779G>A
chr15:g.33810639G>A
chr2:g.18576284G>A
chr12:g.100974858T>C
chr13:g.41194067T>A
chr11:g.124030395A>G
chr4:g.56314856G>A
chr19:g.5274298C>T
chrX:g.2243211C>T
chr1:g.24535103T>C
chr17:g.78439135G>A
chr3:g.51064555G>A
chr1:g.26774879G>A
chr2:g.178665426C>A
chr4:g.105937067C>T
chr17:g.35745614C>T
chr4:g.46041155C>A
chr12:g.57003421C>T
chr1:g.223112586C>T
chr19:g.57841571G>A
chrX:g.77005404C>T
chr10:g.35607593T>A
chr17:g.1280055C>T
chr22:g.32864939T>C
chr7:g.4984988C>T
chr11:g.62649763G>T
chr7:g.96673743T>A
chr1:g.155942572C>T
chr5:g.13841751C>T
chr6:g.7574788G>A
chr20:g.17725065G>A
chr2:g.101387325C>G
chr17:g.50603062C>T
chr4:g.78865637C>T
chr18:g.14105530T>C
chr19:g.8539976G>A
chr7:g.10940093A>G
chr20:g.18024750C>T
chr1:g.117941789A>G
chr12:g.57765109G>A
chr12:g.109510437C>G
chr12:g.53063005G>A
chr2:g.184936931A>C
chr14:g.37591330delATGGCTATGCCAGACAAACCCCCCAGTCCCGGGAGCTAGGA
chr8:g.12570465T>C
chr1:g.147624580A>G
chr10:g.26021698_26021699insT
chr19:g.53259220G>T
chr2:g.218075707G>A
chrX:g.37010253G>A
chr12:g.11091470T>G
chr1:g.32770117G>A
chr5:g.169695818G>T
chrX:g.155277982C>T
chr15:g.49282020C>T
chr11:g.123645586C>T
chr7:g.1547767G>A
chr20:g.1445701G>A
chr4:g.186280337G>A
chr14:g.24415026G>A
chr15:g.64678200C>T
chr11:g.73393758C>T
chr1:g.92242243G>A
chr10:g.103432216_103432217insA
chr10:g.44971799C>T
chr2:g.80302811C>T
chr22:g.22687003G>A
chr16:g.5044358C>T
chr1:g.206732797C>T
chr8:g.8381430G>C
chr8:g.2109449G>A
chr22:g.19131963G>C
chr19:g.35722440G>A
chr17:g.10319135C>T
chr1:g.40311137C>A
chr5:g.141096762G>A
chrX:g.132382234C>A
chr1:g.36282669delTCTC
chr19:g.38907512C>T
chr20:g.41498185G>A
chr17:g.59697483C>T
chr2:g.45006252G>A
chr16:g.1523864G>A
chr19:g.10805954C>T
chr3:g.130567221A>T
chr11:g.93733579C>G
chr3:g.20125929G>A
chr6:g.63712443A>T
chr9:g.2639945T>C
chr7:g.137623505C>A
chr22:g.43229107C>T
chr1:g.205526831C>T
chr20:g.2794214C>T
chr9:g.132014444T>C
chr7:g.5374064G>T
chr8:g.58603372C>T
chrX:g.37782121G>C
chr14:g.20694039G>C
chr4:g.73102532G>A
chr22:g.19877103G>A
chr7:g.77259058C>T
chr12:g.110853432G>A
chr12:g.10451149T>C
chr4:g.122201047G>A
chr5:g.40681649G>A
chr1:g.109687855A>T
chr14:g.91462776delAAATCTCAGTTTTAATCCTTTAAATGTCTGTACAT
chr6:g.32217235G>A
chr8:g.94404206T>C
chr18:g.25227282C>T
chr11:g.69295954delCTTTA
chr1:g.248239485C>A
chr13:g.113233298A>C
chr16:g.19078136T>C
chr7:g.100592893T>C
chr9:g.93034618C>T
chr17:g.58505483C>T
chr3:g.3137301G>T
chr2:g.33595501G>A
chr2:g.21010030G>A
chr11:g.43444152C>T
chr7:g.6170871C>T
chr14:g.104712983C>T
chr1:g.233054371G>A
chr1:g.241604565C>T
chr16:g.27355900A>C
chr1:g.109250669G>A
chr15:g.78596495C>T
chr8:g.41701560C>A
chr12:g.99825328C>T
chr22:g.23782174G>A
chr1:g.116399157C>T
chr1:g.241801333A>G
chr6:g.122997903G>A
chr2:g.162384889G>T
chr1:g.12138344C>T
chr4:g.110618182C>T
chr19:g.41252434A>G
chr19:g.8903943G>C
chr13:g.46055825G>A
chr9:g.6013361A>T
chr3:g.56617154G>A
chr3:g.52395411C>T
chr18:g.35337308T>C
chr3:g.47343990G>A
chr9:g.84002275C>T
chr6:g.146304711G>C
chr22:g.29297907C>T
chr17:g.82460057C>T
chr4:g.56976961delACGCGG
chr14:g.101560274C>T
chr16:g.15747929G>A
chr10:g.86917229A>T
chr1:g.152309934C>T
chr2:g.137275985C>T
chr2:g.232263277G>A
chr12:g.108788532C>T
chrX:g.15252381C>T
chr17:g.62608145A>G
chr20:g.37040187C>T
chr18:g.52906268T>A
chr8:g.101558560C>A
chr2:g.140378279C>A
chr14:g.21030645G>A
chr7:g.82916591G>A
chr4:g.151137755G>A
chr12:g.103662870G>A
chr2:g.28529385G>T
chr11:g.1163928C>T
chr15:g.30991513G>A
chr13:g.25307806C>A
chr1:g.200992353G>A
chr19:g.10293842A>C
chr6:g.136278489C>A
chr17:g.75038944A>G
chr11:g.56613207G>A
chr2:g.148950384G>A
chr2:g.230225793G>T
chr15:g.70096942A>G
chr1:g.21880688C>A
chr19:g.12813479C>T
chr1:g.158623070G>A
chr14:g.23275909G>T
chr1:g.156879151C>T
chr14:g.37812400C>T
chr17:g.79952668G>A
chr1:g.241508632G>T
chr11:g.114242223G>A
chr17:g.28395928C>T
chr3:g.195780349G>A
chr10:g.42790499G>A
chr1:g.200618614T>G
chr2:g.113241612delG
chr4:g.5015209C>T
chrX:g.37008757C>T
chr2:g.44314018C>T
chr4:g.153295604G>A
chr14:g.76836290A>T
chr1:g.25352941A>G
chr11:g.68780688G>T
chr1:g.215879069G>A
chr1:g.220100630T>C
chr4:g.47806995G>A
chr15:g.45140957G>A
chr10:g.133557966G>A
chr1:g.153003305G>A
chr5:g.181195224C>T
chr18:g.2539122G>C
chr7:g.106868976G>A
chr8:g.88116648C>T
chr6:g.83924472C>T
chr13:g.20822141G>T
chr9:g.5069188G>A
chr6:g.1612067G>A
chr20:g.32310105C>T
chr12:g.113058451G>T
chr12:g.112938572C>T
chrX:g.139737973G>A
chr19:g.42234568G>A
chr19:g.10115490G>A
chr2:g.201138902delGTC
chr3:g.15269851C>T
chr3:g.45796421G>A
chr17:g.81529262C>T
chr11:g.75276909G>A
chr20:g.16378924G>A
chr4:g.69112551C>T
chr15:g.43525101C>T
chr3:g.147396448C>T
chr10:g.69572750G>T
chrX:g.133324179G>A
chrX:g.141881698delC
chr19:g.42234444G>A
chr17:g.50186681G>T
chr15:g.55376992G>A
chr15:g.41749128C>T
chr1:g.7663352G>T
chr8:g.3997974G>A
chr2:g.241637001G>A
chr5:g.31551316C>T
chr15:g.63752933T>G
chr8:g.2078761G>A
chr2:g.228018820A>G
chr18:g.43270436C>T
chr1:g.117076705C>T
chr15:g.52340251G>A
chr11:g.33542761G>A
chr19:g.34327855G>A
chr16:g.5025310G>A
chr2:g.100007572G>C
chr19:g.55659270G>A
chr1:g.159439963C>A
chr14:g.59475964C>T
chr7:g.579302A>G
chr17:g.36586046G>A
chr2:g.144517324G>A
chr9:g.8485768C>G
chr2:g.74426311G>A
chr2:g.26942588G>T
chr16:g.58164059G>A
chr2:g.224931549T>C
chr22:g.19191342G>A
chr17:g.54968705C>T
chr8:g.132137937A>G
chr5:g.45303840C>T
chr4:g.75654042G>A
chr4:g.185363494G>A
chr11:g.62516858C>A
chr2:g.169544833G>A
chr1:g.54702742C>T
chr14:g.93586870A>T
chr19:g.56814454G>A
chr17:g.1877234A>T
chr1:g.23693863T>C
chr18:g.76379330G>A
chr7:g.100736626G>A
chr16:g.58581455G>A
chr14:g.74522802C>T
chrY:g.2787624C>T
chr19:g.55912846T>G
chr9:g.128533952G>A
chr5:g.228204G>A
chr17:g.42781260G>A
chr5:g.23524417G>A
chr15:g.77615283G>A
chr13:g.31152934T>G
chr7:g.56104416G>A
chr2:g.17721219G>A
chr1:g.35389955A>G
chr19:g.17981765C>T
chr9:g.86035545C>T
chr8:g.138167987G>A
chr5:g.97026660A>T
chr5:g.80448292_80448293insAAGTGTGTGTCCTCCTTTTTCATCTTCCCTC
chr12:g.132641848C>T
chr22:g.17696188delT
chr1:g.88983679C>T
chr3:g.52378608delC
chr2:g.234496436T>A
chr5:g.154478074C>T
chr19:g.19794700G>A
chr20:g.36255684C>T
chr14:g.73252735C>T
chrX:g.48560155G>A
chr11:g.77625780C>T
chr11:g.73360452G>A
chr10:g.12035381_12035382insT
chr6:g.44403998A>T
chr16:g.68810254T>G
chr1:g.94048919C>T
chr1:g.152032655G>T
chr4:g.110051641C>T
chr9:g.35056994T>A
chr22:g.36864131T>C
chr17:g.20257579C>T
chr11:g.20056541A>G
chr16:g.68167014C>A
chr1:g.15219536C>T
chr17:g.10463113G>A
chr2:g.208172012C>A
chr8:g.109968150G>A
chr16:g.47596430A>T
chr20:g.5987327G>A
chr12:g.13563945G>A
chr19:g.17560398A>G
chr21:g.41899360_41899361insGCCAACATAGTGAAACCCT
chr19:g.51587342C>G
chr15:g.101752838G>A
chr7:g.24702785T>C
chr7:g.40046027T>C
chr17:g.69304750G>C
chr1:g.42449953G>A
chr9:g.86036459G>T
chr1:g.103718039G>T
chr10:g.104070441C>T
chr6:g.52050273C>T
chr22:g.41515448C>T
chr17:g.29166511G>A
chr1:g.46027737A>T
chr15:g.79456711C>T
chr16:g.687159C>T
chr14:g.62987181G>A
chr14:g.94283899_94283900insTG
chr17:g.50379559G>A
chr2:g.69960859G>A
chr7:g.101050554T>C
chr4:g.51994566G>A
chr11:g.6608874T>G
chr11:g.22359417T>A
chr6:g.7231174delCAGCCCTCCACTCGTGGGCAGCT
chr16:g.2286722G>T
chr19:g.42729225T>A
chr13:g.113094520G>A
chr16:g.368564C>T
chr19:g.4431961G>A
chr13:g.95790940C>T
chr5:g.131672347T>C
chr11:g.111882553delATATGACCTGAGGAATATCGT
chr20:g.38346553C>T
chr12:g.48981266C>T
chr15:g.100885306A>G
chr19:g.35299669C>T
chr15:g.34915157C>T
chr5:g.140862721C>T
chr19:g.19245341C>T
chr22:g.43133094C>T
chr11:g.60936872C>T
chr14:g.96264582T>G
chr1:g.109173519G>A
chr1:g.114581311A>C
chr6:g.75828606G>T
chr15:g.65624150C>T
chr4:g.144646635C>G
chr4:g.113255859C>T
chr20:g.3908154G>A
chr15:g.58899489C>T
chr5:g.75029459C>T
chr1:g.16988201G>A
chr7:g.117760500G>T
chr17:g.49619088A>G
chr16:g.77735870C>T
chr1:g.198755961G>A
chr17:g.10457518delT
chr16:g.67952347G>A
chrX:g.154032531A>G
chr21:g.39661326G>T
chr11:g.61429268T>C
chr7:g.4817317C>T
chr19:g.49651393C>T
chr11:g.65535294C>T
chr3:g.63443451T>C
chr1:g.9744002A>T
chr19:g.46388697C>T
chr1:g.236581291C>T
chr17:g.75763312G>C
chr1:g.45566983C>G
chr19:g.3623891G>A
chr9:g.23692532T>G
chr1:g.160416082G>A
chr3:g.138472765G>A
chr16:g.50699699G>T
chr11:g.125777338C>T
chr1:g.210683863C>T
chr3:g.179234262T>G
chr3:g.138130973G>A
chr8:g.106702908C>T
chr2:g.163611189G>A
chr1:g.84865886C>T
chr2:g.218812360G>A
chr3:g.52441642G>T
chr13:g.29026203T>A
chr12:g.104123298G>A
chr9:g.119214020G>A
chr19:g.3532476G>A
chr7:g.75441003C>A
chr5:g.127547863G>A
chr19:g.57776635G>A
chr19:g.12390579T>C
chr18:g.51065524T>A
chr6:g.132588663G>C
chr1:g.84866151T>G
chr4:g.185190498C>T
chr4:g.165100680G>T
chr4:g.2238754T>A
chr17:g.42810882C>T
chr14:g.105051731T>A
chr16:g.75235371C>T
chr11:g.89432789T>G
chr6:g.135466026C>A
chr12:g.7149523_7149524insG
chr13:g.23338386C>T
chr11:g.104037676G>A
chr1:g.186125637A>G
chr2:g.15468410C>T
chr2:g.37213923C>T
chr14:g.100983924C>T
chr5:g.116486800C>T
chr1:g.32771978G>A
chr1:g.45620953G>A
chr18:g.31406359T>A
chr19:g.34327554C>T
chr12:g.80368308C>T
chr16:g.67831189G>C
chr6:g.39195930T>A
chr2:g.222634445C>T
chr12:g.109082583A>G
chr2:g.240462457delGCGCT
chr8:g.23681622delA
chr12:g.51916219G>A
chr12:g.123654949C>T
chr20:g.34863432C>T
chr19:g.12656958C>T
chr6:g.41940380C>A
chr19:g.8895022G>A
chr9:g.116188175C>A
chr13:g.67228228C>T
chr11:g.32396293G>A
chr5:g.140823929C>T
chr4:g.89248006G>C
chr7:g.98231028C>T
chr18:g.47034387C>T
chr8:g.133280249G>A
chr17:g.4932876C>T
chr4:g.10444196G>A
chr8:g.61499575G>A
chr4:g.125490280G>C
chr15:g.42264184T>A
chr15:g.62023783T>C
chr11:g.47378360G>A
chr14:g.58498861G>A
chr5:g.14482698C>T
chr14:g.20224319G>A
chr15:g.82282693delT
chr15:g.90942700C>T
chr1:g.23794368C>A
chr3:g.195721059_195721060insAA
chr5:g.1053456T>C
chr14:g.22531947A>G
chr6:g.142075832C>T
chr12:g.109081348T>G
chr3:g.122275877G>A
chr14:g.34539598_34539599insT
chr1:g.113766207G>T
chr12:g.114355840G>A
chr8:g.23116979G>A
chr12:g.53253537G>C
chr19:g.33772917C>T
chr8:g.88056160G>A
chr21:g.39296301C>T
chr20:g.44197044T>C
chr12:g.56718281T>C
chr1:g.89132148C>A
chr4:g.108846187G>A
chr22:g.38745774G>A
chr9:g.26926462C>T
chr2:g.207613424C>T
chr20:g.34926944C>T
chr11:g.44078785G>T
chr5:g.19612589G>A
chr7:g.44760177C>T
chr13:g.100668650delT
chr12:g.57004472G>A
chr1:g.43365208A>T
chr2:g.218135429C>A
chr20:g.16573273C>T
chr5:g.146638280G>A
chr15:g.50736702T>C
chr18:g.2890717C>T
chr1:g.77297579G>C
chr19:g.49710857G>A
chr14:g.34753570C>T
chr5:g.111446762C>T
chr1:g.103022822A>G
chr19:g.3586533G>T
chr17:g.82406425G>T
chr19:g.37532473G>A
chr12:g.123221846G>A
chr1:g.197328833C>T
chr15:g.40036344C>T
chr19:g.11553764G>A
chr20:g.62758314G>A
chr5:g.139681121G>A
chr2:g.241096047_241096048insTCAGGATGGGACAGGGCC
chr14:g.21081598G>A
chr14:g.23059453G>A
chr16:g.4860854C>T
chr8:g.144517167delC
chr12:g.38654021C>T
chr22:g.17109414delC
chr6:g.150733864G>A
chr19:g.13299028G>A
chr1:g.158547437G>A
chr19:g.13757467G>A
chr4:g.48565638T>C
chr12:g.109581537G>C
chr11:g.65646345C>T
chr12:g.101764897G>A
chr2:g.182757782A>G
chr22:g.50210910C>T
chr6:g.35291368C>T
chr6:g.31150070C>A
chr19:g.41316791A>G
chr5:g.129509132C>T
chr7:g.97181182T>C
chr6:g.85615135C>A
chr2:g.135812870G>A
chr19:g.49635603G>T
chr1:g.12356000C>T
chr12:g.32328388C>A
chr2:g.232381524C>T
chr10:g.113767429C>T
chr9:g.92379840G>A
chr16:g.20786221C>T
chr17:g.75491760C>T
chr13:g.113118438C>T
chr6:g.12123927A>G
chr7:g.152176974G>A
chr3:g.54885560T>A
chr10:g.62376896C>T
chr9:g.132646957C>G
chr11:g.18481687G>T
chr6:g.136592227G>T
chr9:g.37304291_37304292insA
chr3:g.50294947C>T
chr13:g.95927316C>A
chr15:g.54014649G>A
chr1:g.215790096A>T
chr1:g.152306776T>C
chr17:g.40819695G>A
chr12:g.103740694G>A
chr19:g.55175817C>T
chr5:g.154456156A>G
chr8:g.98948888G>A
chr16:g.1912140G>A
chr1:g.59607895C>T
chr6:g.52276470C>T
chr11:g.64801622C>A
chr14:g.73739479C>T
chr2:g.232458900G>A
chr6:g.78897876C>A
chr17:g.35103487C>T
chr14:g.58323537C>T
chr15:g.71012892T>C
chr4:g.115076258A>G
chr19:g.39825966G>A
chr20:g.38565430G>A
chr3:g.183949858C>T
chr3:g.143122247G>A
chr19:g.40801355C>T
chr4:g.9980735C>T
chr6:g.131700689C>T
chr12:g.98456255G>A
chr3:g.151350095A>G
chr1:g.46285445delG
chrX:g.24057695T>C
chr3:g.192799604G>T
chr10:g.92694573A>C
chr3:g.187729444C>T
chr6:g.160548544C>A
chr9:g.104139184G>A
chr4:g.26481738G>A
chrX:g.118761158A>G
chr5:g.140876917C>T
chr11:g.66539735delG
chr1:g.46408483C>T
chr16:g.31079432C>T
chr11:g.95979061G>A
chr9:g.68780612C>G
chr5:g.94692183C>T
chr10:g.79559431G>A
chr7:g.128845134C>A
chr11:g.11936415G>A
chr9:g.4834198G>A
chr9:g.81993450G>A
chr7:g.99037076C>T
chr16:g.30525868G>T
chr17:g.7383011G>A
chr5:g.141247570C>T
chr9:g.37888550T>C
chr19:g.38469139C>T
chr16:g.21679211G>T
chr13:g.24906481C>T
chr9:g.34517407C>T
chr3:g.39144136C>T
chr11:g.126275815G>A
chr1:g.232514917G>A
chr1:g.3727220C>T
chr8:g.143577080G>A
chr19:g.8589469C>T
chr2:g.63056240C>G
chr9:g.34257428C>T
chr10:g.50836164C>T
chr16:g.72811937G>T
chr10:g.50844036delT
chr6:g.118465245C>T
chr17:g.7075017G>A
chr19:g.36627060C>T
chr8:g.99575666G>A
chr14:g.19828125G>T
chr4:g.101080568delA
chr18:g.9255855G>A
chr3:g.78617713delC
chr7:g.27792054G>C
chr5:g.69396514C>T
chr9:g.96336739A>G
chr17:g.41249938C>T
chr19:g.44010734G>A
chr11:g.111754533G>A
chr19:g.41352750G>T
chr3:g.48579805C>A
chr9:g.111542622A>T
chr22:g.41177196C>T
chr5:g.39331682G>C
chr6:g.30584220C>T
chr7:g.96121177C>G
chr17:g.39742638T>G
chr8:g.47863512C>A
chr11:g.66334960C>T
chr1:g.240207583C>T
chr2:g.94829184delGTTTTGCAGGAG
chr4:g.23814440C>T
chr14:g.94568252C>T
chr17:g.4901899T>C
chr19:g.44987360G>A
chr4:g.165340416T>A
chr3:g.156474766G>T
chr11:g.92844717C>T
chr13:g.32337154A>T
chr22:g.26492237C>T
chr6:g.46143438G>T
chr7:g.128844227G>A
chr12:g.108518957A>G
chr13:g.38689362G>C
chr20:g.881183C>T
chr10:g.49322568G>A
chr11:g.74122989G>A
chr11:g.63904860G>A
chr13:g.99255008C>T
chr3:g.64147660T>C
chr15:g.80942308C>T
chr7:g.142328519C>T
chr18:g.47034919C>T
chr11:g.111285741C>T
chr5:g.79121351G>A
chr8:g.55524039C>T
chr18:g.10691247C>T
chr10:g.73632159G>A
chr15:g.75356166G>A
chr6:g.31864673C>T
chr17:g.21191205T>C
chr1:g.152805148C>T
chr19:g.45701803C>T
chr11:g.1245394G>T
chr20:g.46350438C>A
chr10:g.8009119C>T
chr8:g.143614639A>C
chr18:g.45063683C>T
chr8:g.81659428C>T
chr3:g.136082404C>T
chr17:g.40140525C>A
chr14:g.55043202G>T
chr11:g.114530518A>T
chr9:g.122526457C>A
chr12:g.57037066C>T
chr7:g.92062275C>T
chr17:g.81529122C>T
chrX:g.154487697C>T
chr1:g.39315556C>T
chr3:g.140688000G>A
chr17:g.10466296G>A
chr4:g.87662995G>T
chr1:g.155033491C>T
chr20:g.37518925C>T
chr18:g.59902857T>C
chrX:g.154295865G>A
chr4:g.121801324T>C
chr3:g.99849451T>G
chr12:g.112170359G>T
chr2:g.232458741C>T
chr12:g.24584145C>T
chr13:g.113171668G>A
chr9:g.77407604C>A
chr20:g.326112C>G
chr1:g.33334203C>T
chr16:g.2279103G>A
chr3:g.124666542C>T
chr2:g.72334967C>T
chr19:g.41090131G>A
chr1:g.156585790T>C
chr1:g.1543961A>G
chr12:g.6748878G>A
chr16:g.46738009C>T
chr14:g.75882742G>A
chr19:g.1877610C>T
chr17:g.76473859C>T
chr4:g.186209124C>T
chr2:g.137056829T>G
chr18:g.32268765G>A
chr16:g.31487663C>G
chr14:g.64779806C>T
chr10:g.95315096G>C
chr7:g.23260736A>G
chr11:g.2407272C>T
chr14:g.91321171G>A
chr1:g.198750564A>G
chr15:g.58854540G>A
chr2:g.68865865G>A
chr18:g.72859039C>A
chr1:g.11957874G>A
chr3:g.161065471G>A
chr21:g.36036251C>G
chr19:g.45786328C>T
chr12:g.1913029C>T
chr5:g.177627545T>A
chr3:g.98498122G>A
chr8:g.72052720C>T
chr7:g.152207343_152207344insA
chr1:g.27100446G>A
chr18:g.75064104C>T
chr6:g.37312928G>C
chr7:g.4836565C>T
chr10:g.132847263G>T
chr1:g.222943313C>A
chr9:g.130923744C>A
chr5:g.82058556C>G
chr11:g.406440G>A
chr19:g.44236809C>T
chr19:g.2732748C>T
chr1:g.74041387C>T
chr2:g.1173122G>T
chr11:g.36593677A>G
chr6:g.87015363C>T
chr5:g.98779748A>G
chr17:g.1732684G>A
chr17:g.58155468C>T
chr22:g.50142124delA
chr19:g.35065282G>A
chr10:g.26157466C>T
chr11:g.58422887G>T
chr3:g.9739043A>G
chr9:g.129070462C>T
chrX:g.70041936T>C
chr19:g.11364174G>A
chr1:g.2479958C>T
chr10:g.26217919G>A
chr10:g.65920518G>A
chr17:g.47379212T>C
chr6:g.31641140C>A
chr14:g.105624495G>C
chr5:g.139880925delC
chr1:g.206771395G>A
chr4:g.73869763C>T
chr16:g.11691633G>A
chr15:g.34893765G>C
chr15:g.40340953T>G
chr2:g.183087061G>A
chr19:g.57234929G>A
chr15:g.43330206A>C
chr4:g.2824726G>A
chr16:g.10895315C>A
chr12:g.57765474G>A
chr4:g.137521029C>T
chr15:g.59516771G>T
chr1:g.28531858C>T
chrX:g.6533718C>G
chr1:g.197122001C>T
chr2:g.233462642G>T
chr14:g.92011042G>A
chr11:g.17330253C>T
chr19:g.11402113C>T
chr1:g.200408477C>T
chr3:g.77098076G>A
chr11:g.102871924G>A
chr10:g.114163110T>A
chr19:g.52582708C>T
chr2:g.88857394G>A
chr9:g.135765633G>A
chr1:g.180936171G>A
chr15:g.65446785T>C
chr5:g.134411737G>A
chr1:g.84813968C>G
chr12:g.56326661T>C
chr2:g.166472368G>A
chr15:g.34983227G>C
chr12:g.49053266delGG
chr7:g.130401943delTG
chr1:g.43697979C>T
chr11:g.46896236C>A
chr11:g.108918021A>T
chr7:g.43445056G>A
chr1:g.237628005C>A
chr4:g.42574667C>T
chr12:g.6510480G>A
chr9:g.98244127G>A
chr6:g.36330598C>T
chr1:g.64203960delAGTGTGGGAAAG
chr22:g.31345070delG
chr19:g.40014565G>A
chr18:g.69011003A>G
chr4:g.1816741G>A
chr9:g.36643021G>A
chr15:g.33503732C>T
chr7:g.100748163G>T
chr9:g.37746504G>A
chr7:g.34153250C>A
chr19:g.39486473A>G
chr11:g.4545692C>T
chr15:g.25206128C>T
chr17:g.1674666C>T
chr18:g.57650466_57650467insGAAACAGGTACAGCCCTGTGGACCACTGAA
chr11:g.6567705C>T
chr1:g.208043126G>A
chr20:g.44343396C>A
chr21:g.46254455A>G
chrX:g.47448543T>C
chr7:g.152176352delG
chr10:g.95847606G>A
chr16:g.21984630A>T
chr9:g.15465634G>A
chr5:g.134816586T>C
chr3:g.30839071C>T
chr3:g.48648361C>A
chr21:g.45530810delGCAC
chr7:g.41978655A>G
chr12:g.25245351C>G
chr11:g.72007402G>A
chr1:g.201078093G>A
chr12:g.7794689C>A
chr8:g.123207435C>T
chrY:g.21904171C>T
chr10:g.6456750C>A
chr11:g.65107518G>A
chr5:g.151521790G>A
chr1:g.62206958A>G
chr2:g.174081246G>T
chr15:g.28655460C>T
chrX:g.153507044C>T
chr8:g.104148806C>A
chr19:g.17218391C>T
chr10:g.97767849G>A
chr16:g.56969664A>T
chr3:g.177038173C>G
chr14:g.69711108T>G
chr1:g.173941379T>C
chr11:g.57379766C>T
chr19:g.33206347G>A
chr17:g.75729299T>G
chr19:g.12896296C>T
chr1:g.159943000G>A
chr3:g.12590914T>G
chr4:g.83598072G>T
chr4:g.75648672G>A
chr16:g.67661059T>C
chr6:g.497413C>T
chr2:g.172967329G>T
chr16:g.520797G>A
chr22:g.22762316C>T
chr14:g.104946893T>G
chr10:g.100075934C>T
chr12:g.123345462G>A
chr20:g.24978789C>T
chr16:g.29879965C>T
chr15:g.24955045C>T
chr2:g.218871094C>T
chr2:g.164952711A>G
chr10:g.101991992C>T
chr2:g.9335179G>C
chr14:g.45206086delT
chr19:g.37363336C>T
chr8:g.116658795A>G
chr17:g.58362584G>T
chr11:g.62798666A>C
chr6:g.160241515C>T
chr12:g.4596174G>A
chr12:g.112081077T>A
chr19:g.6732118C>T
chr19:g.1797001C>T
chr18:g.45917703T>C
chr19:g.10713006T>C
chr8:g.36888540G>A
chr1:g.31738893C>T
chr12:g.114672055T>C
chrX:g.154712368G>C
chr19:g.5040000_5040001insA
chr10:g.133557936G>T
chr12:g.8060082delA
chr16:g.84759920T>C
chr9:g.115048337C>T
chr8:g.104497752T>G
chr17:g.7673533A>C
chr5:g.141486319C>T
chr19:g.50876569delAA
chr7:g.111863366C>T
chr19:g.45619164C>T
chr11:g.105918885C>A
chr19:g.56384870_56384871insATTAACAGTGTGTAGCAGGGC
chr9:g.35740297G>A
chr2:g.80303216G>A
chr19:g.8316541A>G
chr11:g.551945G>A
chr7:g.139872260C>A
chr2:g.89142615C>A
chr5:g.15928333G>A
chr2:g.178583105_178583106insT
chr19:g.44525229A>G
chr10:g.75094749C>T
chr1:g.248474052T>A
chr3:g.52523662C>T
chr6:g.31116797C>T
chr7:g.129424878G>A
chr13:g.41061613C>T
chr18:g.670815T>A
chr3:g.99850366C>G
chr2:g.99438719C>T
chr2:g.96023432G>A
chr19:g.15683666G>A
chrX:g.48934819T>C
chr11:g.36574299G>A
chr2:g.233460272C>T
chr1:g.155014797G>A
chr19:g.9969595G>A
chr20:g.35287559G>T
chr17:g.63421748C>T
chr5:g.140875691C>A
chr16:g.70762954G>A
chr15:g.34386665G>A
chrX:g.120873952C>A
chr4:g.109976057T>A
chr11:g.62523499C>T
chr6:g.30919780G>A
chr17:g.44380998C>A
chr19:g.22756940A>G
chrX:g.45079167A>G
chr12:g.30982619G>A
chr16:g.15740124G>A
chr20:g.34534814delC
chr19:g.57420555G>A
chr17:g.75957554C>T
chr6:g.31863613C>G
chr17:g.28524585G>A
chr12:g.56087876C>T
chr8:g.43292691C>G
chr2:g.127428757delG
chr5:g.179870286C>T
chr9:g.132988360C>T
chr3:g.39052045A>G
chr9:g.18622254C>T
chr2:g.31868301G>C
chr11:g.119027679C>T
chr8:g.94526935G>A
chr17:g.28574190C>T
chr5:g.127340580G>A
chr1:g.235458711T>C
chr2:g.71073570A>T
chr14:g.62981085G>A
chr1:g.212836013A>G
chrX:g.13617747G>A
chr20:g.45777090C>T
chr10:g.63176461G>A
chr12:g.53482630G>A
chr5:g.156759342delG
chr2:g.127505286G>A
chr5:g.87411321A>G
chr2:g.167243382G>A
chr3:g.128060598A>G
chr2:g.178570647C>G
chr11:g.93738147C>A
chr11:g.62717016G>A
chr19:g.38152922G>A
chr12:g.82403078T>C
chr15:g.68335717G>A
chr16:g.70129035C>A
chr14:g.59727583C>T
chr17:g.28910091C>T
chr10:g.12028950delG
chr5:g.168126791C>A
chr8:g.123019304C>T
chr19:g.57859846C>T
chr9:g.77283413G>A
chr2:g.184938891T>G
chr9:g.136941274G>A
chr17:g.82061965G>A
chr12:g.117049150C>T
chr2:g.140233264G>T
chr7:g.138771227G>A
chr7:g.100683603T>C
chr11:g.123060261G>T
chr3:g.157363687C>T
chr3:g.2571551C>A
chr14:g.23061433G>A
chr6:g.108664209T>C
chr8:g.103921862A>G
chr6:g.52272321T>G
chr9:g.27291030delATT
chrX:g.24311531C>T
chr3:g.113453815C>T
chr6:g.42259645G>A
chr11:g.115238569C>T
chr2:g.168561299G>A
chr1:g.34218752A>C
chrX:g.153770623C>G
chr3:g.36831154C>A
chr8:g.56441751C>A
chr10:g.77821955C>A
chr16:g.15726930G>A
chr3:g.33510621T>C
chr22:g.50504951C>T
chr4:g.44447738C>T
chr6:g.75678642A>T
chr15:g.43524889G>C
chr1:g.115837962G>A
chr2:g.198084962C>T
chr19:g.47475506C>A
chr2:g.202295712G>A
chr14:g.37592672G>A
chr2:g.166002656T>C
chr6:g.144516336T>C
chr7:g.6170883C>T
chr3:g.179203765T>A
chr6:g.34531720G>C
chr12:g.85805147T>C
chr7:g.4245745C>T
chr12:g.32718681A>G
chr12:g.123621761G>T
chr11:g.123059502T>C
chr18:g.32287988G>A
chr15:g.70668411T>C
chr7:g.102320351C>T
chr6:g.52277147G>A
chr12:g.85980280C>T
chr1:g.181739225G>A
chr10:g.100972851C>T
chr1:g.21233527C>T
chr7:g.27129458G>A
chr4:g.1113418C>A
chr10:g.104038495G>A
chr18:g.50273410G>A
chr16:g.55694025G>A
chr6:g.151452454C>T
chr19:g.50458966G>A
chr17:g.28616548G>A
chrX:g.153869633T>C
chr11:g.46375893C>T
chr15:g.62717682G>A
chr1:g.37034066A>G
chr1:g.197062894A>G
chrX:g.124380878C>T
chr12:g.57564127A>T
chr19:g.15256096C>T
chr2:g.216432847C>T
chr20:g.63689966_63689967insG
chr5:g.172935136_172935137insC
chr15:g.77615881G>A
chr8:g.94832012delT
chr19:g.56621430C>T
chr9:g.112574213A>G
chr1:g.173537020C>T
chr14:g.72470067G>A
chr10:g.97880253G>A
chr10:g.101781794T>C
chr2:g.233682656C>T
chr9:g.134829994C>T
chr17:g.7709384delG
chr4:g.159355991G>A
chr11:g.59853308C>T
chr9:g.2643685G>A
chr9:g.15175099C>T
chr17:g.82088208G>A
chr3:g.134159309T>C
chr8:g.2100916G>A
chr20:g.45298198C>T
chr15:g.45111915G>A
chr4:g.7809661G>C
chrX:g.143628853G>A
chr2:g.62874448G>A
chr22:g.41675068G>A
chr15:g.88905875_88905876insT
chr19:g.55483561G>T
chr17:g.62677309C>T
chr17:g.7675082G>C
chr5:g.69566601C>T
chr10:g.118040515T>A
chr19:g.57129340T>C
chr10:g.59234380A>G
chr20:g.34290737T>C
chr3:g.127030390C>T
chr5:g.456934C>T
chr1:g.164792576C>T
chr15:g.31042009C>T
chrX:g.151701022G>A
chr12:g.131982292G>T
chr1:g.109656955C>T
chr13:g.42301133C>A
chr7:g.142863211C>T
chr22:g.24411630C>T
chr18:g.12673406C>A
chr1:g.248850370C>T
chr2:g.106843912G>A
chrX:g.12885665G>T
chr3:g.48585701G>T
chr5:g.95512574C>T
chr16:g.31873890G>A
chr5:g.83493692G>A
chr4:g.20596620G>A
chr12:g.48083614G>A
chr11:g.117503941G>A
chr1:g.158678401C>A
chr10:g.26292932A>T
chr6:g.32029324C>T
chr1:g.158669438C>G
chr19:g.21767512C>T
chr11:g.65536024G>A
chr6:g.38848754C>T
chr2:g.29181793G>A
chr8:g.144504286G>A
chr13:g.30906474C>T
chr18:g.59331508_59331509insT
chr7:g.137015646C>G
chr11:g.55795584T>C
chr16:g.4884403G>A
chr8:g.143929546C>A
chr15:g.33697972C>T
chr2:g.178727112G>A
chr14:g.69091716T>C
chr20:g.63203125C>T
chr6:g.127985728G>C
chr19:g.9214350A>C
chr19:g.44704170C>T
chr2:g.178567609G>A
chr10:g.86942579G>A
chr8:g.26766096A>G
chr22:g.17137961C>T
chr3:g.27719444A>T
chr2:g.238140933C>T
chr12:g.13564008G>A
chr8:g.92005258C>T
chr12:g.49026640C>A
chr11:g.18933892G>A
chr2:g.200670645C>G
chr11:g.114242317G>A
chr9:g.37006488A>G
chr4:g.81142941G>A
chr17:g.41583110C>T
chr11:g.124619690G>C
chr17:g.65053726T>C
chr3:g.184183550C>T
chr1:g.25223170A>G
chr19:g.51478596C>T
chr11:g.71435612C>T
chr12:g.57472662C>T
chr1:g.39422871G>C
chrX:g.131544230C>T
chr20:g.2862599C>T
chr14:g.94251797C>A
chr9:g.113256156A>T
chr7:g.136903174C>A
chr1:g.228371121C>A
chr10:g.133198622G>T
chr9:g.21206427C>T
chr16:g.51140603C>T
chr21:g.10485725A>G
chr7:g.139047832G>A
chr3:g.78938694G>A
chrX:g.130679688C>T
chr2:g.189075438C>A
chr11:g.108347319T>A
chr21:g.39929111G>C
chr1:g.241549707G>T
chr11:g.62523560G>A
chr8:g.8890648C>T
chr16:g.30025431C>T
chr20:g.16732272A>G
chr13:g.24709752G>A
chr16:g.20997343C>T
chr3:g.52487519A>C
chrX:g.153872355C>T
chr7:g.23516530T>A
chr16:g.81937758A>G
chr11:g.78669078C>A
chr20:g.51790716G>A
chr8:g.123346210_123346211insATCCT
chr5:g.139481560G>T
chr12:g.110486603C>T
chr6:g.52071035A>G
chr2:g.70979193C>G
chr5:g.13700825A>C
chr5:g.140796243G>A
chr7:g.32070466G>A
chr19:g.3760230C>T
chr4:g.10490429G>A
chr19:g.50959092G>T
chr17:g.13000307G>A
chr7:g.148591041G>A
chr4:g.56020754G>A
chr1:g.33636547C>T
chr1:g.234398530G>A
chr17:g.49316947A>G
chr10:g.70531325G>A
chr19:g.18258175delGCCGTCTCCACG
chr5:g.39341145C>T
chr13:g.48707208G>C
chr6:g.2833992C>G
chr7:g.128840654C>T
chr10:g.80504758C>T
chr19:g.4511982C>T
chr17:g.998805G>A
chr22:g.43672045C>T
chr10:g.126330485C>G
chr5:g.9066553C>T
chr5:g.7706812G>A
chr22:g.30555172G>A
chr3:g.46712388G>A
chr20:g.3692170G>A
chr2:g.165091347T>C
chr9:g.117713523C>T
chr5:g.141629686G>C
chr2:g.44275732C>T
chr19:g.8822768T>C
chr10:g.113606243A>G
chr12:g.6581576G>A
chr22:g.32398029A>G
chr7:g.152139728delT
chr9:g.112997667C>T
chr1:g.11502031G>A
chr22:g.29806501A>C
chr3:g.49675303delG
chr1:g.47094634C>T
chr2:g.37083309_37083310insT
chr1:g.158355465G>T
chr7:g.73229616C>T
chr21:g.40347929G>T
chr15:g.81292818G>A
chr4:g.15601360C>T
chr3:g.48604293G>A
chr3:g.36483062C>T
chr19:g.19238488C>T
chr5:g.72203793_72203794insCC
chr14:g.41886867C>A
chr1:g.203217832_203217833insCCCGCCCAGTCCCTAGACCATGGA
chr17:g.20205867A>G
chr14:g.85623145C>T
chr7:g.154446237G>A
chrX:g.71598038G>A
chr19:g.12753293C>T
chr3:g.170501111A>C
chr20:g.59022897G>A
chr5:g.145872920G>A
chr16:g.27528600T>C
chr2:g.209696589G>C
chr11:g.125655355T>C
chr11:g.57369910G>A
chrX:g.126164915C>T
chr8:g.17232462A>G
chr11:g.65279573C>T
chr10:g.97757715G>C
chr4:g.1806285C>T
chr14:g.24164778C>T
chr7:g.4129804A>G
chr9:g.120817914C>T
chr1:g.117883575A>C
chr17:g.80436145C>T
chr12:g.39617010A>C
chr10:g.50132957T>A
chr7:g.44572697C>T
chr4:g.168472704G>A
chr10:g.133195714G>A
chr12:g.103942665C>T
chr8:g.94856898C>T
chrX:g.99720756T>G
chr6:g.44304662C>T
chr19:g.43737629G>A
chr3:g.4735168A>G
chr6:g.16146685T>A
chr9:g.108952247G>C
chr22:g.20568592G>C
chr19:g.45591815G>A
chr4:g.2950367_2950368insAGATCGGAAGAG
chr7:g.155302806G>A
chr5:g.141650361G>A
chr22:g.44916576G>A
chr13:g.32398600_32398601insT
chr20:g.17227311G>C
chr13:g.26681195_26681196insA
chr4:g.3767329G>A
chr7:g.90726722G>A
chr19:g.33772122C>T
chr11:g.65887832G>A
chr14:g.32732634G>A
chr6:g.87530799G>A
chr7:g.100105051G>A
chr7:g.6147742C>T
chr4:g.7025146G>A
chr1:g.181577825C>A
chr5:g.40843283C>T
chr6:g.26188969G>A
chr19:g.1271166C>T
chr9:g.101552232A>T
chr16:g.30925846G>A
chr2:g.164743673T>G
chr6:g.28301662G>T
chr19:g.6362443C>T
chr12:g.12912608C>T
chr1:g.78492674G>C
chr19:g.35743834G>A
chr12:g.82353154A>G
chr6:g.160718357G>A
chr1:g.152351604G>A
chr17:g.42613885C>T
chr1:g.243164604G>T
chr14:g.81278580A>G
chr19:g.50771043G>T
chr4:g.39288674C>A
chr5:g.81342673T>C
chr20:g.3278945G>A
chr9:g.133433660G>A
chr10:g.116597853C>T
chr8:g.115619591C>T
chr9:g.69246768C>T
chr17:g.28711698G>A
chr9:g.133445797G>A
chr1:g.23408696G>T
chr17:g.45267704C>T
chr1:g.158181699C>T
chr2:g.208165657A>G
chr6:g.110226175C>T
chr17:g.6090391G>A
chr11:g.18701028C>T
chr17:g.58308572G>A
chr6:g.46854067C>T
chr2:g.27224365C>T
chrX:g.111852323G>A
chr8:g.10607479G>T
chr6:g.157148736C>T
chr2:g.211665336T>C
chr8:g.1678300C>T
chr11:g.7038797G>A
chr19:g.22757688C>A
chr21:g.30319817G>A
chr1:g.41046424T>C
chr9:g.77020298G>A
chr22:g.26503697G>A
chr6:g.170285614G>A
chr19:g.55157661C>T
chr3:g.172295511A>G
chr17:g.42477690T>C
chr1:g.45508946G>A
chr17:g.37179374A>T
chr5:g.138115760C>T
chr1:g.203869874C>G
chr10:g.100288990G>A
chr17:g.81952797_81952798insA
chr9:g.32544155delAG
chr15:g.88906599C>T
chr2:g.146587781C>A
chr14:g.39177846G>A
chr4:g.184766726G>A
chr10:g.114127534G>A
chr5:g.427881G>A
chr19:g.2917155T>C
chr9:g.122213614T>C
chr1:g.35450451C>T
chr7:g.65399289C>T
chr12:g.52306236C>T
chr1:g.200911795G>A
chr13:g.35196111G>A
chr2:g.197489109G>A
chr4:g.122271600G>A
chr20:g.20288730C>G
chrX:g.3317243C>T
chr7:g.2709198G>A
chr16:g.24823845G>A
chr16:g.9764627C>A
chr6:g.155311261C>G
chr19:g.51993039C>T
chr1:g.150663691G>A
chr14:g.64031081C>T
chr4:g.25362246G>A
chr13:g.112833016G>A
chrX:g.22272943T>G
chr17:g.82738542G>A
chr15:g.70687640G>A
chr9:g.130905244G>A
chr2:g.74530721G>A
chr1:g.248522354G>C
chr19:g.4510489_4510490insAAACAG
chr12:g.122206666A>C
chr5:g.141400325C>T
chr10:g.100973239C>T
chr5:g.55031464G>A
chr16:g.31397863G>T
chr9:g.95111531C>T
chr7:g.75510974G>A
chr19:g.18175077C>A
chr20:g.45312322T>C
chr19:g.41888800C>T
chr8:g.144843023_144843024insT
chr2:g.202518957G>C
chr8:g.13095143C>T
chr17:g.78098405C>G
chr2:g.178748536A>G
chr13:g.107865940C>T
chr7:g.120974889T>A
chr2:g.233847423C>G
chr16:g.89733531G>A
chr2:g.203145063A>G
chr14:g.91272592G>C
chr17:g.42834788T>G
chr5:g.98856521C>T
chr5:g.304204C>T
chr6:g.56508719C>T
chr1:g.203044067T>A
chrX:g.152134744G>A
chr20:g.49374324G>A
chr1:g.157134222T>C
chr5:g.177292085C>T
chr11:g.133920689G>T
chr11:g.62607706G>A
chr1:g.12322629G>A
chr7:g.100401264C>T
[truncated: 8,000 more rows]

## Sheet: SKCM
chr7:g.140753336A>T
chr1:g.114713908T>C
chr7:g.140753337C>T
chr1:g.114713909G>T
chr7:g.56106490G>A
chr8:g.124539103C>T
chr1:g.114713908T>A
chr7:g.6387261C>T
chr19:g.49665874C>T
chr22:g.15698715G>A
chr2:g.208248389G>A
chr19:g.10119913G>A
chr17:g.59210028G>A
chr8:g.124539104C>T
chr14:g.62987180C>T
chr22:g.15528394G>A
chr19:g.35745434C>T
chr3:g.124730387G>A
chr9:g.127937878C>T
chr15:g.66436824C>T
chr1:g.18482884G>A
chr17:g.6651614C>T
chr5:g.111374864C>T
chr2:g.218584683C>T
chr20:g.13049117G>A
chr19:g.58499498G>A
chr19:g.20258472G>A
chr2:g.137616283G>A
chr14:g.91785354G>A
chr19:g.58499497G>A
chr1:g.43389886C>T
chr6:g.31959111C>T
chr2:g.137657119G>A
chr2:g.74472680G>A
chr7:g.102572593C>T
chr5:g.13769515C>T
chr9:g.125149801G>A
chr19:g.8961415G>A
chr9:g.21971018G>A
chr7:g.147132246G>A
chr18:g.33743956C>T
chr1:g.241098711G>A
chr1:g.158291337C>T
chr7:g.144050613C>T
chr7:g.30755694C>T
chr11:g.5323810G>A
chr1:g.177014810C>T
chr9:g.119167231C>T
chr11:g.100061367C>T
chr7:g.150477742G>A
chr3:g.150546789C>T
chr20:g.35411982C>T
chr15:g.40382906C>T
chr3:g.189869329C>T
chr1:g.13225252C>T
chr7:g.115940946G>A
chr14:g.22766690C>T
chr2:g.167243883G>A
chr16:g.19444118C>T
chr7:g.120951122C>T
chr8:g.30847487C>T
chr7:g.135211561G>A
chr7:g.98912179C>T
chr9:g.137205690G>A
chr9:g.4285999C>T
chrX:g.141003554G>A
chr3:g.111593733C>T
chr22:g.41468688G>A
chr5:g.31317433C>T
chr14:g.19921503G>A
chr11:g.4848629G>A
chr10:g.60042733C>T
chr8:g.39746507C>T
chr2:g.167251367C>T
chrX:g.114906680C>T
chr19:g.3762667G>A
chr1:g.172532475G>A
chr5:g.69369558G>A
chr21:g.10598078C>T
chr11:g.4848488G>A
chr11:g.58358426G>A
chr17:g.64561537G>A
chr20:g.35542046G>A
chr4:g.99313880C>T
chr5:g.141178084C>T
chr19:g.8731527C>T
chr7:g.34811853C>T
chr1:g.165249610G>A
chr7:g.141973585G>A
chr19:g.22976738G>A
chr8:g.138143004C>T
chr5:g.141388294C>T
chr6:g.29044812G>A
chr12:g.49018865G>A
chr5:g.41382119C>T
chr5:g.65624999C>T
chr1:g.190098828C>T
chr7:g.113879510C>T
chr10:g.124801782G>A
chr10:g.27995079C>T
chr4:g.99342826G>A
chr3:g.160100947G>A
chr5:g.150701105C>T
chr11:g.118203650G>A
chr11:g.5254395G>A
chr16:g.9763579C>T
chr8:g.14554847C>T
chr3:g.189894284G>A
chr4:g.70409701C>T
chr20:g.20052443G>A
chr9:g.104536193G>A
chr5:g.69369559G>A
chr16:g.77367704C>T
chr7:g.143935997G>A
chr10:g.54023128G>A
chr5:g.141331561C>T
chr11:g.54707643C>T
chr19:g.53267330C>T
chr12:g.45836858C>T
chr2:g.112918757C>T
chrX:g.141907262G>A
chr14:g.19780444G>A
chr18:g.22415595G>A
chr7:g.147043949G>A
chr2:g.167248707G>A
chr14:g.19434332C>T
chr5:g.13769543C>T
chr14:g.21665759G>A
chr19:g.45691983C>T
chr1:g.169609683G>A
chr1:g.74041796G>A
chr22:g.35082544C>T
chr15:g.34343159C>T
chr3:g.108953648C>T
chr7:g.82915294G>A
chr15:g.24676496G>A
chr2:g.137056548G>A
chr22:g.37849419C>T
chr6:g.136278394C>T
chrX:g.3323309C>T
chr2:g.178756687C>T
chr14:g.19781125C>T
chr12:g.7482695G>A
chrX:g.3317665C>T
chr3:g.53347571G>A
chr2:g.28496138C>T
chr14:g.23469698G>A
chr19:g.37186311G>A
chr2:g.140457581C>T
chr1:g.56792264C>T
chr1:g.248452836C>T
chr7:g.82915589G>A
chr17:g.59210029G>A
chr4:g.47744417C>T
chr2:g.178704933C>T
chr19:g.43258235C>T
chr7:g.113878248C>T
chr11:g.123939894C>T
chr1:g.196918264G>A
chr6:g.83407794G>A
chr17:g.7674894G>A
chr11:g.123940266C>T
chr4:g.137531580G>A
chr11:g.55367976G>A
chr5:g.13885213C>T
chr8:g.54626767G>A
chr21:g.40042602C>T
chr1:g.197039236G>A
chr1:g.12894983C>T
chr2:g.124504418C>T
chr6:g.55774114C>T
chr6:g.29044492C>T
chr1:g.152776452G>A
chr11:g.64270132G>A
chr12:g.55452706G>A
chr18:g.53499408C>T
chr6:g.56067320C>T
chr2:g.30751126G>A
chr18:g.61816181G>A
chr8:g.15748437C>T
chr11:g.4639862C>T
chr8:g.113314673C>T
chr3:g.54503539G>A
chr16:g.70523553C>T
chr1:g.74612751G>A
chr11:g.48325054C>T
chr5:g.41199780G>A
chr20:g.9580616C>T
chr19:g.54906576G>A
chr22:g.38681951C>T
chr14:g.20014936G>A
chr7:g.140753334T>C
chr19:g.13307845G>A
chr19:g.53804030C>T
chr15:g.86264820G>A
chr12:g.96742482C>T
chr2:g.166447665G>A
chr11:g.63302395C>T
chr3:g.96987681C>T
chr8:g.24330030G>A
chr12:g.55320808C>T
chr18:g.63656851C>T
chr1:g.248180479C>T
chr12:g.70552832C>T
chr4:g.182679836G>A
chrX:g.152701582C>T
chr7:g.150804842G>A
chr8:g.24399008G>A
chr8:g.24401924C>T
chr12:g.103640158C>T
chr1:g.147908084C>T
chr4:g.15935810C>T
chr16:g.71184966C>T
chr19:g.52438334C>T
chr10:g.50844122C>T
chr11:g.45252585G>A
chr16:g.19474254G>A
chr4:g.122353074C>T
chr2:g.137450953G>A
chr8:g.3359230G>A
chr9:g.21971187G>A
chr3:g.184106304G>A
chr5:g.26903545G>A
chr1:g.248294950G>A
chr14:g.18601352G>A
chrX:g.151700035G>A
chr5:g.122425391G>A
chr19:g.49665847C>T
chr1:g.103754499G>A
chr18:g.31157455C>T
chr5:g.36039514C>T
chrX:g.151955752G>A
chr2:g.127584312G>A
chr12:g.55401224G>A
chr11:g.56122561C>T
chr12:g.6663125C>T
chr2:g.182240168C>T
chr1:g.97699420G>A
chr4:g.20519441C>T
chr1:g.220141882C>T
chr10:g.94781836C>T
chr1:g.3022478C>T
chr6:g.55263802C>T
chr21:g.40347778C>T
chr8:g.105561396G>A
chr12:g.121031505G>A
chr4:g.81204620G>A
chr7:g.141836304C>T
chr11:g.61792599G>A
chr6:g.73077787G>A
chr16:g.71537277C>T
chr11:g.124309847C>T
chr1:g.74606860C>T
chr5:g.31323099G>A
chr6:g.130441715G>A
chr5:g.41000721G>A
chr6:g.31972346G>A
chr8:g.66051611G>A
chr8:g.105802180G>A
chr15:g.96783707G>A
chr1:g.247841411C>T
chr2:g.232458020G>A
chr6:g.130441382G>A
chr19:g.16980521G>A
chr22:g.15710975G>A
chr17:g.10505226C>T
chr7:g.142054883C>T
chr4:g.122380165G>A
chr1:g.190281699G>A
chr4:g.97712786C>T
chr4:g.68229516C>T
chr14:g.19827570G>A
chr4:g.70366946C>T
chr7:g.100959648C>T
chr19:g.55912571C>T
chr8:g.86726636G>A
chr6:g.56171110C>T
chr1:g.32222399C>T
chr8:g.51408612G>A
chr4:g.54728055A>G
chr7:g.134449780G>A
chr11:g.56093646C>T
chr8:g.25861060C>T
chr5:g.140869096C>T
chr11:g.56989828G>A
chr1:g.158356690C>T
chr15:g.64163030G>A
chr1:g.158578970C>T
chr20:g.31388987G>A
chr3:g.7579262G>A
chr3:g.108849177G>A
chr19:g.50948961G>A
chr1:g.172532732G>A
chr7:g.126439046G>A
chr19:g.9960327G>A
chr8:g.3586237G>A
chr11:g.18588704C>T
chr2:g.195960849G>A
chr4:g.55090053C>T
chr2:g.118970157C>T
chr6:g.56069053C>T
chr5:g.13753490G>A
chr8:g.68134175G>A
chr2:g.137057194C>T
chr7:g.142345923C>T
chr13:g.28710775G>A
chr19:g.42906955C>T
chr1:g.158466245C>T
chr5:g.140808859G>A
chr19:g.47032687C>T
chr16:g.21209703C>T
chr1:g.158844112C>T
chr3:g.109032778C>T
chr19:g.22180978G>A
chr2:g.107872184C>T
chr5:g.144474132G>A
chr19:g.6974603C>T
chr12:g.21765748C>T
chr19:g.57135184G>A
chr10:g.28069819C>T
chr1:g.13053671G>A
chr2:g.107872409G>A
chr14:g.38254548C>T
chr2:g.137056749G>A
chr1:g.36805089G>A
chr1:g.157521170G>A
chr1:g.192184490G>A
chr11:g.58439699G>A
chr5:g.141122923G>A
chr12:g.21801129C>T
chr16:g.51140199G>A
chr5:g.141095005G>A
chr21:g.10596079C>T
chr1:g.247549076G>A
chr1:g.70852856C>T
chrX:g.111912725C>T
chr2:g.214014012C>T
chr12:g.45836908C>T
chr2:g.211623993G>A
chr14:g.19936281G>A
chr11:g.4914799G>A
chr7:g.150802226C>T
chr19:g.8580952G>A
chr11:g.18933963G>A
chr17:g.10400959C>T
chr8:g.3359247G>A
chr8:g.109419139G>A
chr2:g.37231652G>A
chr7:g.82915855C>T
chr7:g.53036094C>T
chr20:g.59253128G>A
chr21:g.10561112C>T
chr2:g.228021799C>T
chr3:g.26709841G>A
chr8:g.76863998C>T
chr12:g.18738675G>A
chr1:g.248349173C>T
chr4:g.1728651C>T
chr14:g.101046508C>T
chr15:g.83263675C>T
chr20:g.42315779G>A
chr8:g.112263754G>A
chr5:g.153698107G>A
chr19:g.55858466G>A
chr12:g.123875406C>T
chr1:g.159535972G>A
chr5:g.41061668G>A
chr11:g.59515665C>T
chr5:g.141178604G>A
chr2:g.178746747C>T
chr19:g.16765052C>T
chr11:g.5986227G>A
chr8:g.68146331C>T
chr20:g.9411082C>T
chr16:g.71067357C>T
chr19:g.43195196C>T
chr17:g.53823372G>A
chr7:g.86839684G>A
chr15:g.20284208C>T
chr2:g.178764703G>A
chr10:g.122576638G>A
chr11:g.56989615G>A
chr5:g.26890645C>T
chr22:g.15721421G>A
chr11:g.56276038C>T
chr19:g.8972637C>T
chr2:g.229512926G>A
chr11:g.55967999G>A
chr1:g.158765998G>A
chr10:g.60073878C>T
chr14:g.23469699G>A
chr17:g.12752558C>T
chr8:g.71299663G>A
chr1:g.67430417C>T
chr8:g.7823399G>A
chr12:g.2504507C>T
chr12:g.20883516G>A
chr8:g.39610613G>A
chr5:g.65188078C>T
chr1:g.12883109G>A
chr17:g.58170408C>T
chr7:g.147300240G>A
chr8:g.139619073C>T
chr21:g.10514146G>A
chr19:g.21973863G>A
chr11:g.5200650C>T
chr7:g.142008671G>A
chr9:g.21974680G>A
chr11:g.56122624G>A
chr10:g.37219486G>A
chr7:g.143756443C>T
chr14:g.21634795G>A
chr8:g.39246095C>T
chr20:g.2602176C>T
chr7:g.142058286C>T
chr21:g.40080182C>T
chr5:g.168806477G>A
chr5:g.128966491C>T
chr2:g.106843710G>A
chr16:g.24346762C>T
chr1:g.197421535C>T
chr20:g.46041400G>A
chr8:g.70069249G>A
chr6:g.127813659G>A
chr4:g.74449137G>A
chr7:g.88282916G>A
chr19:g.51531340C>T
chr1:g.46900296G>A
chr10:g.124046017C>T
chr8:g.104392803C>T
chr2:g.137160361G>A
chr14:g.19876864G>A
chr22:g.20464920G>A
chr18:g.53499476G>A
chr9:g.32632918G>A
chr3:g.108971380G>A
chr8:g.54627045G>A
chr6:g.159266184C>T
chr6:g.56059222C>T
chr2:g.178749041C>T
chr17:g.10526642C>T
chr4:g.144116893C>T
chr14:g.75985762G>A
chr16:g.20661799G>A
chr7:g.64831462C>T
chrX:g.74743620G>A
chr17:g.10516572C>T
chr4:g.69214260G>A
chrX:g.78755275C>T
chr2:g.115343832C>T
chr5:g.13762773C>T
chr8:g.61376660G>A
chr12:g.32878283G>A
chr5:g.140834840C>T
chr7:g.142054866C>T
chr21:g.14165390C>T
chr18:g.53459232G>A
chr1:g.222543630G>A
chr11:g.55368582G>A
chr16:g.20032148G>A
chr3:g.17185183G>A
chr2:g.214414390G>A
chr3:g.98169063C>T
chr4:g.125448556C>T
chr19:g.15021669G>A
chr3:g.111545054G>A
chr4:g.137530384C>T
chr7:g.84999495C>T
chr2:g.106433228C>T
chr7:g.97117635C>T
chr1:g.247841237G>A
chr2:g.178739543C>T
chrX:g.34130248C>T
chr1:g.198716749G>A
chr11:g.5234164C>T
chr12:g.55321537G>A
chr22:g.21666010G>A
chr10:g.95067401G>A
chr18:g.47023081C>T
chr3:g.102464246C>T
chr5:g.13830664C>T
chr16:g.31528625C>T
chr1:g.156842421G>A
chr1:g.116768592C>T
chr7:g.20643532C>T
chr16:g.3204555C>T
chr16:g.20948554C>T
chr1:g.248122531C>T
chr19:g.54632182G>A
chr10:g.102152296C>T
chr19:g.8961424C>T
chr3:g.121993677G>A
chr2:g.233743432G>A
chr8:g.120445398G>A
chr15:g.25197427G>A
chr20:g.45176123C>T
chr11:g.124117765C>T
chrX:g.136344735G>A
chr9:g.120980125G>A
chr3:g.108963581C>T
chr14:g.21665360C>T
chr4:g.74446740G>A
chr1:g.159535915G>A
chr5:g.26903569C>T
chr2:g.140352983G>A
chr5:g.13923376G>A
chr10:g.53809535C>T
chr7:g.150627766C>T
chr5:g.140876305C>T
chr1:g.232425804G>A
chr8:g.25850602C>T
chr20:g.42678049C>T
chr1:g.118081625C>T
chr20:g.42161391C>T
chr19:g.54729704G>A
chr4:g.79407213G>A
chr2:g.210314937C>T
chr1:g.70028190G>A
chr7:g.53036234G>A
chr12:g.11267992C>T
chr1:g.65617971C>T
chr3:g.50292517G>A
chr8:g.69673175G>A
chr19:g.53697594C>T
chr2:g.26479639C>T
chr15:g.20157586G>A
chr19:g.49496381C>T
chr9:g.33265003G>A
chr17:g.35363186G>A
chr9:g.21971121G>A
chr11:g.4821846G>A
chr9:g.104526868G>A
chr15:g.40382931G>A
chr12:g.7715422C>T
chr8:g.72568087C>T
chr12:g.13562687G>A
chr6:g.69354305C>T
chr3:g.123700608G>A
chr7:g.135211559G>A
chr1:g.166956767C>T
chr20:g.20090860G>A
chr21:g.40276142C>T
chr5:g.13900240C>T
chr7:g.6387262C>T
chr8:g.24394132G>A
chr4:g.144708301G>A
chr11:g.55554405C>T
chr11:g.94380286G>A
chr8:g.107303352C>T
chr12:g.100380865C>T
chr7:g.137521947G>A
chr2:g.162518157C>T
chr5:g.13737439C>T
chr1:g.7803123C>T
chr3:g.62532930G>A
chr4:g.155722162G>A
chr12:g.34026739C>T
chr4:g.137529975G>A
chr4:g.174677184G>A
chr2:g.218135765C>T
chr5:g.35875524C>T
chr8:g.72936734G>A
chr11:g.55368668G>A
chr2:g.178630869C>T
chr12:g.21019303G>A
chr11:g.55555262C>T
chr1:g.13225090C>T
chr9:g.137205691G>A
chr2:g.178750627C>T
chr19:g.55862061G>A
chr11:g.58954809C>T
chr8:g.51408643C>T
chr7:g.144074217G>A
chr6:g.31959095G>A
chr7:g.87541363G>A
chr14:g.99257531C>T
chr12:g.11308663C>T
chr3:g.26709584G>A
chr14:g.19876450C>T
chr7:g.150520068G>A
chr16:g.28498177C>T
chr8:g.72936537G>A
chr1:g.175362729C>T
chr17:g.31206297C>T
chr20:g.61910440G>A
chrX:g.84145541C>T
chr5:g.153795552G>A
chr9:g.134728709G>A
chr12:g.103638034G>A
chr8:g.39935156G>A
chr8:g.51408851G>A
chr9:g.117713581G>A
chr1:g.75242020C>T
chr6:g.63280528C>T
chr7:g.82916495G>A
chr6:g.28575384C>T
chr11:g.100299243G>A
chr2:g.167244724C>T
chr6:g.54940410G>A
chr19:g.57131247G>A
chr4:g.95840703G>A
chr4:g.69589587G>A
chr19:g.22769320G>A
chr4:g.49061843G>A
chr15:g.24677450C>T
chrX:g.124520674C>T
chr4:g.188147302C>T
chr2:g.79086575G>A
chr5:g.102498735C>T
chr11:g.123753845C>T
chr2:g.178837609C>T
chr12:g.117258434C>T
chr5:g.13735213G>A
chr21:g.10473508C>T
chr8:g.39233983C>T
chr14:g.94289949C>T
chr7:g.82952858G>A
chr5:g.45262305C>T
chr17:g.10497836C>T
chr8:g.134637495G>A
chr20:g.5302280G>A
chr19:g.8974381G>A
chr12:g.18563410G>A
chr11:g.19056263C>T
chr5:g.157052452C>T
chr2:g.195738014C>T
chr7:g.141919580G>A
chr20:g.42098471C>T
chr15:g.24982095C>T
chr10:g.37219097G>A
chr1:g.115286402C>T
chr2:g.206307715G>A
chr17:g.10524988C>T
chr18:g.31334141G>A
chr4:g.150193204C>T
chr8:g.113098901G>A
chr11:g.4946794C>T
chr12:g.39720856G>A
chr5:g.24488117C>T
chr22:g.38552702G>A
chr3:g.167522406C>T
chr12:g.48526150C>T
chr16:g.78030575G>A
chr7:g.126532991G>A
chr1:g.158354012C>T
chr17:g.10495271G>A
chr5:g.13776526G>A
chr5:g.178981730C>T
chr3:g.93896595G>A
chr19:g.45691963C>T
chr13:g.103046176G>A
chr12:g.2567651C>T
chr8:g.76852088C>T
chr3:g.122284924G>A
chr8:g.56441618G>A
chr11:g.56613248G>A
chr1:g.197435035G>A
chr3:g.77493309C>T
chr11:g.48245686G>A
chrX:g.152766901G>A
chr11:g.100191205G>A
chr14:g.19828286C>T
chr5:g.50403400C>T
chr16:g.69339621G>A
chr9:g.128276245C>T
chr14:g.61996267C>T
chr2:g.48709012C>T
chr19:g.15949094C>T
chr17:g.11822463G>A
chr1:g.159713828G>A
chr2:g.179483369C>T
chr12:g.45064615C>T
chr14:g.21325861G>A
chr1:g.7663407C>T
chr5:g.35876000C>T
chr1:g.196958910G>A
chr7:g.142102640G>A
chr18:g.14763876G>A
chr17:g.51931080C>T
chr20:g.9437051G>A
chr16:g.70855215G>A
chr19:g.4793072C>T
chr5:g.141200404C>T
chr4:g.46250581C>T
chr1:g.197039280G>A
chr6:g.55495434G>A
chr11:g.4924061C>T
chr5:g.140803064C>T
chr7:g.86864477G>A
chr5:g.41149357G>A
chr8:g.75559022G>A
chr4:g.106924058C>T
chr14:g.19936593G>A
chr16:g.21058189C>T
chr2:g.1910298C>T
chr11:g.5488993C>T
chr11:g.4682047C>T
chr10:g.27936865C>T
chr3:g.169093015C>T
chr11:g.49953298G>A
chr16:g.3204585C>T
chr16:g.26135994G>A
chr1:g.74026833G>A
chr19:g.15923872G>A
chr12:g.18738778G>A
chr19:g.55807863G>A
chr16:g.20324229G>A
chr9:g.21971188G>A
chr3:g.3039977G>A
chr19:g.8957830C>T
chr4:g.166734992C>T
chr17:g.3092875C>T
chr5:g.136251859C>T
chr21:g.14165304G>A
chr15:g.94470357C>T
chr18:g.53179012G>A
chr11:g.56417647C>T
chr14:g.19921476G>A
chr4:g.103589831C>T
chr12:g.47236091C>T
chr5:g.13870868G>A
chr1:g.116764581G>A
chr17:g.10455041C>T
chr17:g.4901861C>T
chr20:g.15499785G>A
chr1:g.223003063C>T
chr12:g.4370775G>A
chr9:g.122553817C>T
chr20:g.9539451G>A
chr8:g.3367061G>A
chr1:g.169542001C>T
chr7:g.82955143C>T
chr11:g.7987298C>T
chr4:g.157078065C>T
chr7:g.143960888G>A
chr3:g.99849049C>T
chr3:g.2887190G>A
chr22:g.25832991C>T
chr4:g.76367376C>T
chr3:g.109312677C>T
chr11:g.40115327C>T
chr2:g.140358938G>A
chr3:g.169946701C>T
chr6:g.76041972G>A
chr20:g.33379553G>A
chr4:g.68568212C>T
chr3:g.26709910C>T
chr2:g.44281409C>T
chr8:g.130903880G>A
chr11:g.92798561C>T
chr19:g.22757256G>A
chr9:g.117713589C>T
chr5:g.141398537C>T
chr12:g.4811352C>T
chr8:g.39706887G>A
chr19:g.54574978G>A
chr3:g.17009803C>T
chr19:g.52800669G>A
chr2:g.205301582G>A
chr4:g.46303573C>T
chr2:g.178748476C>T
chr3:g.56296395C>T
chr2:g.228017993C>T
chr1:g.158606624C>T
chr12:g.101116741G>A
chr11:g.56290788G>A
chr11:g.62839602C>T
chr14:g.106470435C>T
chr2:g.233713253G>A
chr11:g.59478182C>T
chr11:g.4946618G>A
chr15:g.23566180C>T
chr2:g.178751731C>T
chr1:g.74573393C>T
chr6:g.135195927C>T
chr1:g.201383118C>T
chr5:g.121851952G>A
chr9:g.32631966C>T
chr14:g.21666009G>A
chr14:g.101026832G>A
chr6:g.96203175G>A
chr12:g.48483255C>T
chr1:g.175406699C>T
chr7:g.144095226G>A
chr14:g.94615011G>A
chr2:g.189923631G>A
chr3:g.38752458G>A
chr17:g.10521217G>A
chr3:g.69196387G>A
chr19:g.8959219G>A
chr21:g.10482806G>A
chr12:g.56453693G>A
chr7:g.143444091G>A
chr18:g.33738761G>A
chr3:g.133951098C>T
chr7:g.49802786G>A
chr18:g.33215642C>T
chr1:g.13371046C>T
chr19:g.19516205C>T
chr11:g.130473062C>T
chr2:g.166462516C>T
chr5:g.13931142C>T
chr2:g.195845065C>T
chr13:g.19048052G>A
chr5:g.13911418C>T
chr5:g.140968052G>A
chr2:g.225582533G>A
chr19:g.54819713G>A
chr7:g.140753336A>C
chr4:g.157335763C>T
chr7:g.144050434C>T
chrX:g.27981097C>T
chr8:g.68121036G>A
chr10:g.21125883G>A
chr16:g.72130249C>T
chr7:g.143052534C>T
chr2:g.106843041C>T
chr7:g.137578293G>A
chr5:g.13766066C>T
chr2:g.240030148G>A
chr7:g.82956157C>T
chr1:g.173557362C>T
chr12:g.21178635C>T
chr7:g.147395742C>T
chr17:g.78486272G>A
chrX:g.151176706G>A
chr8:g.76854671G>A
chr2:g.135809668G>A
chr16:g.19440436G>A
chr5:g.13931223C>T
chr1:g.159440717C>T
chr6:g.76042011G>A
chr2:g.113028115C>T
chr2:g.178574529C>T
chr17:g.7674945G>A
chr12:g.5739389G>A
chr15:g.34791152C>T
chr8:g.3409538G>A
chr19:g.11178362G>A
chr8:g.54627234C>T
chr11:g.5047108C>T
chr11:g.4545623C>T
chr14:g.19920797G>A
chr14:g.46651215C>T
chr11:g.55651261C>T
chr7:g.24623739C>T
chr22:g.22646871C>T
chr3:g.147402748C>T
chr4:g.99352662C>T
chr7:g.142308775C>T
chr8:g.24395753G>A
chr3:g.38697875C>T
chr7:g.34153121G>A
chr11:g.55773629C>T
chr1:g.228304485C>T
chr4:g.46041045G>A
chr1:g.158717657G>A
chr4:g.69639279C>T
chr5:g.140850410G>A
chr8:g.144722048G>A
chrX:g.73843969G>A
chr19:g.51769096C>T
chr7:g.142103341G>A
chr19:g.10403562C>T
chr16:g.13920158G>A
chr19:g.19516218G>A
chr5:g.122450726G>A
chr1:g.233139833G>A
chr2:g.178790098C>T
chr2:g.178729820C>T
chr5:g.141209089C>T
chr2:g.98396015C>T
chr7:g.130668748G>A
chr1:g.233650033C>T
chr2:g.31529336G>A
chr17:g.10531698C>T
chr22:g.36141994C>T
chr17:g.7654111G>A
chr10:g.25598754C>T
chr5:g.40835220G>A
chr3:g.112208360G>A
chr11:g.17516273G>A
chr19:g.15680489G>A
chr12:g.52432056C>T
chr21:g.37018067G>A
chr10:g.93612650C>T
chr6:g.55359087G>A
chr19:g.15678359C>T
chr9:g.101686810C>T
chr8:g.113019096C>T
chr3:g.122254304C>T
chr22:g.15528438C>T
chr2:g.167869635G>A
chr15:g.65055217G>A
chr5:g.102498644C>T
chr17:g.81683840C>T
chr11:g.99916060G>A
chr5:g.41153856C>T
chr12:g.89604224G>A
chr1:g.217683288C>T
chr19:g.57978284G>A
chr12:g.48526264C>T
chr8:g.142875869G>A
chr5:g.141151182G>A
chr14:g.94288397C>T
chr15:g.43581292G>A
chr5:g.76877757C>T
chr11:g.55888129G>A
chr4:g.55089696G>A
chr8:g.72567795C>T
chr1:g.118055904C>T
chr3:g.184290614C>T
chr5:g.31799527C>T
chr1:g.167127634G>A
chr2:g.227032243C>T
chr9:g.4286286G>A
chr14:g.98717324C>T
chr22:g.15690035G>A
chr11:g.65605976G>A
chr5:g.39202955C>T
chr12:g.52792340G>A
chr4:g.103589673G>A
chr2:g.178749622C>T
chr12:g.20901444G>A
chr15:g.79032267G>A
chr11:g.123943189G>A
chr11:g.58118533G>A
chr6:g.76002972G>A
chr7:g.143052920G>A
chr1:g.209760363G>A
chr21:g.40013352C>T
chr15:g.55498418C>T
chr1:g.247605608C>T
chr11:g.24914509C>T
chr2:g.178719346G>A
chr7:g.141973492G>A
chr19:g.15629214C>T
chr2:g.135788372C>T
chr11:g.57187414C>T
chr8:g.105803436G>A
chr1:g.75218609G>A
chr4:g.157152784C>T
chr19:g.5772926G>A
chrX:g.3330248C>T
chr15:g.54622401C>T
chr19:g.44387972G>A
chr17:g.81683810C>T
chr20:g.45222809C>T
chr4:g.80963631C>T
chr2:g.137667835C>T
chr1:g.171208906C>T
chr15:g.24676851G>A
chr6:g.28572741G>A
chr12:g.4811248G>A
chr21:g.10577491G>A
chr3:g.172523328G>A
chr2:g.165377646G>A
chr6:g.27958119G>A
chr12:g.7369446C>T
chr1:g.179618645G>A
chr3:g.169115476C>T
chr21:g.40075175C>T
chr1:g.151779222G>A
chr19:g.9103013C>T
chr20:g.2794301G>A
chr4:g.185623394C>T
chr2:g.228018016C>T
chr7:g.142252327C>T
chr2:g.191836415G>A
chr7:g.71810421C>T
chr20:g.44429654G>A
chr5:g.13901435G>A
chr8:g.123980648C>T
chr6:g.136698529G>A
chr8:g.24485306G>A
chr7:g.37741192G>A
chr8:g.54622219C>T
chr9:g.127937881C>T
chr11:g.18934471G>A
chr8:g.109087522G>A
chr13:g.33055274C>T
chr1:g.158480123C>T
chr12:g.21043392C>T
chr2:g.151650615C>T
chr1:g.113830015G>A
chr2:g.195864797G>A
chr1:g.33622204G>A
chr8:g.54627726C>T
chr4:g.184631809G>A
chr19:g.38304678G>A
chr2:g.230357919C>T
chr18:g.46704600C>T
chr17:g.12752887G>A
chr12:g.46792980C>T
chr13:g.83880336C>T
chr12:g.125644115G>A
chr1:g.248521972C>T
chr2:g.80647826C>T
chr15:g.42745988G>A
chr1:g.74439595G>A
chr1:g.196469026C>T
chrX:g.5893207G>A
chr15:g.66436825C>T
chr2:g.181494750C>T
chr13:g.71572971G>A
chr7:g.142252179G>A
chr19:g.8954180C>T
chr7:g.6692311G>A
chr11:g.7959670C>T
chrX:g.141003684G>A
chr19:g.8969825C>T
chr12:g.43432345C>T
chr5:g.141178389C>T
chr11:g.56031265C>T
chr20:g.9566284G>A
chr11:g.99819556C>T
chr5:g.90653498C>T
chr2:g.130075279G>A
chr3:g.11017436G>A
chr11:g.4946649G>A
chr19:g.43258283G>A
chr12:g.57751653T>A
chr14:g.70246756G>A
chr15:g.24678527C>T
chr6:g.65303381G>A
chr8:g.91351836C>T
chr2:g.166073486C>T
chr19:g.53711049G>A
chr7:g.103503159G>A
chr7:g.142720979C>T
chr17:g.20902330G>A
chr9:g.104617650C>T
chr5:g.13753438G>A
chr2:g.178776665C>T
chr19:g.8974561G>A
chr3:g.38728551C>T
chr16:g.51141104G>A
chr8:g.3018629G>A
chr3:g.167242552G>A
chr11:g.55343472C>T
chr11:g.56031370C>T
chr13:g.18838706C>T
chr14:g.81371059G>A
chr6:g.127829539G>A
chr19:g.41850438G>A
chr20:g.42677928C>T
chr2:g.102684318C>T
chr11:g.7043644C>T
chr8:g.24500858C>T
chr8:g.39610692C>T
chr9:g.101686882C>T
chr11:g.56232705G>A
chr7:g.101043615C>T
chr4:g.186534037C>T
chr14:g.70167995G>A
chr20:g.59254228G>A
chr11:g.124319393C>T
chr5:g.13793648G>A
chr2:g.166199061G>A
chr17:g.7670685G>A
chr8:g.49075264C>T
chr5:g.140802174G>A
chrX:g.116172931C>T
chr17:g.10496415G>A
chr4:g.143999426G>A
chr16:g.55823605C>T
chr15:g.25174839C>T
chr2:g.178837496G>A
chr5:g.141225874G>A
chr12:g.21300369C>T
chr9:g.104598876C>T
chr6:g.38982353G>A
chr3:g.151880901C>T
chr20:g.5302303G>A
chr16:g.77431535C>T
chr4:g.137532152C>T
chr8:g.92005144C>T
chr10:g.67180358G>A
chr3:g.121279933G>A
chr14:g.105643888C>T
chr13:g.28713434G>A
chr12:g.85980131G>A
chr2:g.188994778G>A
chr3:g.194672235G>A
chr12:g.34022470C>T
chr12:g.68248726C>T
chr19:g.53109454G>A
chr1:g.171110969G>A
chr8:g.130836402G>A
chr3:g.167333886C>T
chr14:g.78645206G>A
chr11:g.123017886C>T
chr3:g.98470260G>A
chr1:g.97305282C>T
chr4:g.69480646C>T
chr4:g.43030558G>A
chr17:g.81955534G>A
chr7:g.38685920C>T
chr3:g.98168746G>A
chr19:g.7740536G>A
chr4:g.69214156G>A
chr6:g.10876457C>T
chr3:g.38309045C>T
chr1:g.247840976C>T
chr5:g.38403803G>A
chr5:g.41004911C>T
chr1:g.176556491C>T
chr10:g.123757344C>T
chr12:g.117524896G>A
chr6:g.138773767C>T
chr8:g.105802092G>A
chr8:g.72937516G>A
chr1:g.248681969G>A
chr7:g.23787980G>A
chr8:g.109425154C>T
chr12:g.79296132C>T
chr7:g.98848225G>A
chr11:g.54707156C>T
chr19:g.44429696G>A
chr7:g.77199535C>T
chr12:g.99504575G>A
chr8:g.54624990C>T
chr1:g.213997055C>T
chr5:g.141102971C>T
chr6:g.55333921G>A
chr11:g.18934074G>A
chr19:g.44086973C>T
chr5:g.168199909C>T
chr11:g.56031309G>A
chr13:g.101057967C>T
chr8:g.109088214G>A
chr15:g.26547853G>A
chr1:g.247491616G>A
chr5:g.41160356G>A
chr19:g.51499607C>T
chr19:g.8966211G>A
chr10:g.96984187C>T
chr2:g.233729374C>T
chr8:g.54627776C>T
chr19:g.54939042C>T
chr12:g.102846951C>T
chr3:g.70977833G>A
chr10:g.105158934C>T
chr19:g.56003773C>T
chr19:g.49665875C>T
chr11:g.5151682G>A
chr3:g.38614022C>T
chr20:g.42352204C>T
chr7:g.148383656G>A
chr12:g.45848879C>T
chr11:g.48488804G>A
chr18:g.72538184G>A
chr7:g.142332592C>T
chr16:g.26135918C>T
chr7:g.141935857C>T
chr15:g.50263251C>T
chr7:g.93105039C>T
chr9:g.101671020G>A
chr5:g.90628616G>A
chr19:g.22756298C>T
chr2:g.140850202G>A
chrX:g.78960994C>T
chr11:g.123943304G>A
chr5:g.13841860C>T
chr10:g.37141975G>A
chr19:g.20007067G>A
chr1:g.120833687T>C
chr15:g.21431792C>T
chr14:g.105742185G>A
chr7:g.140781611C>T
chr10:g.27398366G>A
chr2:g.108252475C>T
chr1:g.13392230C>T
chr1:g.173524907G>A
chr21:g.30337216G>A
chr20:g.59192994C>T
chr1:g.158717725G>A
chr7:g.86765006G>A
chr2:g.18584187C>T
chr12:g.125349742C>T
chr4:g.42893326C>T
chr5:g.140823595C>T
chr5:g.38406156G>A
chr19:g.8960429C>T
chr7:g.20681557G>A
chr14:g.105865239G>A
chr10:g.123762037C>T
chr1:g.248650747G>A
chr16:g.21201993C>T
chr2:g.68393173G>A
chr3:g.184038586G>A
chr8:g.107284610C>T
chr11:g.58439357G>A
chr5:g.13923360C>T
chr7:g.122698111G>A
chr20:g.5302673G>A
chr1:g.237784121G>A
chr7:g.87741536C>T
chr2:g.166038050C>T
chr5:g.13770793G>A
chr1:g.111454296C>T
chr1:g.181745357G>A
chr1:g.45500236C>T
chr10:g.105262410G>A
chr17:g.50373189C>T
chr2:g.233204230C>T
chr12:g.72621746G>A
chr17:g.11763546G>A
chr1:g.216199789C>T
chr11:g.49952494C>T
chr3:g.98087189G>A
chr2:g.140492650C>T
chr14:g.94314109C>T
chr12:g.100987564C>T
chr7:g.155070931C>T
chr1:g.56912415C>T
chr8:g.68105251C>T
chr4:g.69280852G>A
chr6:g.28572665C>T
chr1:g.216506895C>T
chr7:g.143321747C>T
chr2:g.228017604C>T
chr6:g.129049915C>T
chr5:g.41149253C>T
chr5:g.26881053C>T
chr1:g.214532419G>A
chr4:g.137521401G>A
chr11:g.7960552G>A
chr10:g.44375991C>T
chr19:g.45691966C>T
chr12:g.18081203C>T
chr1:g.12879815C>T
chr7:g.37867832G>A
chr12:g.11393269C>T
chr10:g.122621356G>A
chr7:g.141973573C>T
chr16:g.2500411C>T
chr1:g.56933392C>T
chrX:g.152736590C>T
chr3:g.189974654G>A
chr8:g.54628160G>A
chr1:g.12794096G>A
chr7:g.93132622G>A
chr8:g.25861210C>T
chr22:g.25903721G>A
chr14:g.22207563G>A
chr8:g.24463957C>T
chr11:g.55774082C>T
chr21:g.40708488C>T
chr7:g.14574314G>A
chr2:g.1922349G>A
chr5:g.35773963G>A
chr11:g.5788682G>A
chrX:g.152653351C>T
chr10:g.45147412G>A
chr16:g.20032527G>A
chr2:g.141020029C>T
chr11:g.22377519G>A
chr15:g.54013804G>A
chr17:g.39742599C>T
chr5:g.40955498G>A
chr4:g.99287572G>A
chrX:g.120376392C>T
chr11:g.56232947C>T
chr19:g.8964738G>A
chr14:g.96264711G>A
chr4:g.68951343C>T
chrX:g.141907487C>T
chr2:g.113641417C>T
chr2:g.178776196G>A
chr11:g.45252586G>A
chr5:g.41159144C>T
chr3:g.122261995C>T
chr5:g.116012428C>T
chr20:g.227304C>T
chr6:g.63280669C>T
chr5:g.140856918G>A
chr12:g.119530943G>A
chr1:g.247425605G>A
chr22:g.25832989C>T
chr10:g.24595140G>A
chr5:g.161686255G>A
chr12:g.119520167G>A
chr11:g.56613404C>T
chr5:g.45461854C>T
chr5:g.140843236G>A
chr4:g.173616026G>A
chr5:g.141124348G>A
chr18:g.47033518C>T
chr9:g.122567816C>T
chr14:g.21723844G>A
chr8:g.24476473G>A
chr17:g.64054792G>A
chr4:g.188003485C>T
chrX:g.3317733G>A
chr14:g.22096473C>T
chr2:g.197402759C>T
chr19:g.8951925G>A
chr8:g.24331279G>A
chr2:g.36801340G>A
chr1:g.248388487G>A
chrX:g.152189890G>A
chr11:g.49982172G>A
chr5:g.152392114C>T
chr3:g.7578623C>T
chr1:g.15548301C>T
chr1:g.248203561C>T
chr1:g.190098465C>T
chr11:g.4915644C>T
chr1:g.115072968G>A
chr18:g.53157422G>A
chr3:g.124632623C>T
chr5:g.22078654G>A
chr2:g.178800551C>T
chr3:g.98149867G>A
chr2:g.30910961G>A
chr21:g.10538730G>A
chr11:g.4821791C>T
chr12:g.9112203G>A
chrX:g.143629380C>T
chr5:g.146000175G>A
chr6:g.130441471C>T
chr1:g.234231616G>A
chr3:g.7578451C>T
chr18:g.68897264G>A
chr4:g.46064453C>T
chr14:g.62987169C>T
chr19:g.39470241C>T
chr20:g.1476104G>A
chr8:g.3230208C>T
chr1:g.209788400G>A
chr3:g.86968899G>A
chr15:g.94470411C>T
chr10:g.26128459C>T
chr1:g.33743384C>T
chr19:g.56028442C>T
chr11:g.7960192G>A
chr19:g.54279457G>A
chr5:g.38370407G>A
chr1:g.86577985C>T
chr8:g.43342256G>A
chr19:g.54256285C>T
chr7:g.103697946G>A
chr7:g.53035710G>A
chr5:g.140809010C>T
chr8:g.64615122C>T
[truncated: 8,654 more rows]

[truncated: 2 more sheets: THCA, UCEC]
