# Supplementary material for: Identification of 12 cancer types through genome deep learning
Source: Sci Rep. 2019 Nov 21;9:17256. doi: 10.1038/s41598-019-53989-3 (PMC6872744; doi:10.1038/s41598-019-53989-3)
Supplement: Supplementary file 4 — Dataset2 [file 41598_2019_53989_MOESM4_ESM.xlsx]

## Sheet: BLCA
32135e35-7281-5af3-ac74-ee9886531b90	chr10:g.94402613G>A	Single base substitution	5_prime_UTR_variant TBC1D12 None	51/412,12.38%	59/10188	MODIFIER
714b48a7-d922-57f5-b339-f7c9329cd9bb	chr10:g.94402611C>T	Single base substitution	5_prime_UTR_variant TBC1D12 None	35/412,8.5%	46/10188	MODIFIER
a58a3ed9-1151-56e9-8ae6-c10607b83ab7	chr4:g.1801841C>G	Single base substitution	missense_variant FGFR3 S249C	32/412,7.77%	39/10188	MODERATE
a34dbc69-77ad-5c45-9c4b-e26ea62bde83	chr3:g.179218303G>A	Single base substitution	missense_variant PIK3CA E545K	29/412,7.04%	258/10188	MODERATE
31df4cc1-3220-53c9-97a0-e926dd3f982b	chr3:g.179218294G>A	Single base substitution	missense_variant PIK3CA E542K	19/412,4.61%	167/10188	MODERATE
fea35168-3c39-5195-8678-c3966c2da024	chr17:g.39711955C>T	Single base substitution	missense_variant ERBB2 S310F	19/412,4.61%	38/10188	MODERATE
8d2dfec2-3a12-511c-90e9-3e29c039b548	chr17:g.7674220C>T	Single base substitution	missense_variant TP53 R248Q	17/412,4.13%	121/10188	MODERATE
60135987-2b21-54f1-8652-2b8d37874da0	chr17:g.7673781C>G	Single base substitution	missense_variant TP53 R280T	12/412,2.91%	18/10188	MODERATE
ee64103a-c5b8-58a5-b80d-4a44139b8aa3	chr9:g.134436505C>T	Single base substitution	missense_variant RXRA S427F	12/412,2.91%	14/10188	MODERATE
1ffb64dc-6b6a-5ec0-b6bc-6e7dc4ea031a	chr17:g.7673767C>T	Single base substitution	missense_variant TP53 E285K	11/412,2.67%	24/10188	MODERATE
9e362895-cabf-5cf6-bb3b-71f0178b78f7	chr3:g.185152807G>A	Single base substitution	missense_variant C3orf70 S6L	9/412,2.18%	17/10188	MODERATE
adc5ca97-e44e-5f9e-8f28-87117415fd32	chr19:g.45364429T>C	Single base substitution	missense_variant ERCC2 N238S	9/412,2.18%	9/10188	MODERATE
5687d8a7-f91b-514f-be9c-16a43e47520c	chr4:g.1804372A>G	Single base substitution	missense_variant FGFR3 Y373C	8/412,1.94%	10/10188	MODERATE
9e42ae44-7a69-5886-bf43-5c90b66f85a3	chrX:g.45063557C>T	Single base substitution	stop_gained KDM6A Q555*	8/412,1.94%	8/10188	HIGH
b6fa8b1e-af44-5c11-b7e6-bfc792786dd5	chr4:g.152326137G>C	Single base substitution	missense_variant FBXW7 R505G	8/412,1.94%	28/10188	MODERATE
2c0a2265-13e6-565a-b18d-b475f069bcc4	chr2:g.20447979G>A	Single base substitution	missense_variant RHOB E172K	7/412,1.7%	7/10188	MODERATE
bf84d076-785a-5e28-8f8f-9bbb0aa4b1ff	chr17:g.7673537G>A	Single base substitution	stop_gained TP53 Q331*	7/412,1.7%	22/10188	HIGH
c1e9cade-154f-5cac-9b2f-482e93149d3f	chr7:g.17335775G>C	Single base substitution	missense_variant AHR Q383H	7/412,1.7%	9/10188	MODERATE
073c56c1-937c-54e7-add6-1c6bc2552a72	chr2:g.197400729C>T	Single base substitution	missense_variant SF3B1 E902K	6/412,1.46%	6/10188	MODERATE
0eb6e3d3-5ff4-5d55-8f8f-9cc230748fc7	chr6:g.87589942G>A	Single base substitution	missense_variant RARS2 R6C	6/412,1.46%	16/10188	MODERATE
56a1eecd-1e95-53c8-aae3-4e79bb68aa40	chr5:g.41009375C>T	Single base substitution	missense_variant MROH2B E1109K	6/412,1.46%	9/10188	MODERATE
6ca04c35-6dc1-5194-bc81-7737d975f138	chr1:g.145578886T>C	Single base substitution	non_coding_transcript_exon_variant NBPF25P None	6/412,1.46%	54/10188	MODIFIER
92b75ae1-8d4d-52c2-8658-9c981eef0e57	chr3:g.179234297A>G	Single base substitution	missense_variant PIK3CA H1047R	6/412,1.46%	234/10188	MODERATE
b6a50126-d955-5337-a4e4-599ce0cefedb	chr17:g.7673809C>T	Single base substitution	missense_variant TP53 E271K	6/412,1.46%	13/10188	MODERATE
edd1ae2c-3ca9-52bd-a124-b09ed304fcc2	chr12:g.25245350C>T	Single base substitution	missense_variant KRAS G12D	6/412,1.46%	208/10188	MODERATE
fff602f4-8d73-57cf-91e8-34aee01a7ecf	chr13:g.48411476G>A	Single base substitution	synonymous_variant LPAR6 F316F	6/412,1.46%	7/10188	LOW
0077b831-f952-54f8-befb-870f0215220c	chr12:g.20370109G>A	Single base substitution	synonymous_variant PDE3A L275L	5/412,1.21%	12/10188	LOW
43422159-7803-546f-893b-9c92bd2ee7a8	chr17:g.7673781C>T	Single base substitution	missense_variant TP53 R280K	5/412,1.21%	17/10188	MODERATE
477e2125-974b-5af0-a876-25596d99ddbf	chr17:g.7673803G>A	Single base substitution	missense_variant TP53 R273C	5/412,1.21%	125/10188	MODERATE
5842b216-64ed-57ab-81bc-94fa9b8f0401	chrX:g.124063161C>T	Single base substitution	stop_gained STAG2 Q593*	5/412,1.21%	6/10188	HIGH
856e2239-2495-571c-a3ec-dd699e36e934	chr2:g.177234217G>C	Single base substitution	missense_variant NFE2L2 R34G	5/412,1.21%	20/10188	MODERATE
97cb5c87-3974-5974-aa4c-d5cd98273b2a	chr17:g.7674241G>A	Single base substitution	missense_variant TP53 S241F	5/412,1.21%	24/10188	MODERATE
c42b9a7d-cfd9-57e4-b212-35ac1c22e517	chr7:g.5528611C>T	Single base substitution	missense_variant ACTB G158R	5/412,1.21%	8/10188	MODERATE
cbad870c-52b8-5576-853b-1485dd8809cf	chr4:g.1804362G>T	Single base substitution	missense_variant FGFR3 G370C	5/412,1.21%	5/10188	MODERATE
0a2b9f3f-0d04-5746-9670-42e1601aebc4	chr10:g.73849279G>A	Single base substitution	synonymous_variant CAMK2G I132I	4/412,0.97%	4/10188	LOW
101dc257-3140-5921-86cc-b03c47402362	chr6:g.32189708C>T	Single base substitution	missense_variant PBX2 E70K	4/412,0.97%	5/10188	MODERATE
27b7d6ee-a5d2-551c-8a6b-ae4e41124d8d	chr5:g.34867018G>A	Single base substitution	synonymous_variant TTC23L Q263Q	4/412,0.97%	5/10188	LOW
2d4d0495-d26c-5a06-ac0f-948a3297c4e2	chr3:g.179218303G>C	Single base substitution	missense_variant PIK3CA E545Q	4/412,0.97%	9/10188	MODERATE
39da35de-2350-5593-95ca-c995fb661dc1	chr17:g.7674221G>A	Single base substitution	missense_variant TP53 R248W	4/412,0.97%	90/10188	MODERATE
3a10c8cc-f9c3-5682-b834-30485bbce3c1	chr17:g.7674957G>A	Single base substitution	stop_gained TP53 Q192*	4/412,0.97%	24/10188	HIGH
3d204bf2-f8f7-5ad3-b75d-f7edd61016d0	chr19:g.54430888C>T	Single base substitution	stop_gained TTYH1 Q339*	4/412,0.97%	4/10188	HIGH
746d664d-1c63-5e87-9b8b-35d2bdc798b9	chr17:g.19188070G>A	Single base substitution	non_coding_transcript_exon_variant SNORD3A None	4/412,0.97%	5/10188	MODIFIER
7eba121f-bd27-584f-94ae-3791178e00dd	chr7:g.148787088G>A	Single base substitution	missense_variant CUL1 D483N	4/412,0.97%	5/10188	MODERATE
80cbf759-f6bb-58a0-b1dc-e2c17a01d99a	chr3:g.48661569C>T	Single base substitution	missense_variant CELSR3 E356K	4/412,0.97%	4/10188	MODERATE
8e30604f-3a45-5533-bdd7-0a4353700318	chr17:g.7675088C>T	Single base substitution	missense_variant TP53 R175H	4/412,0.97%	156/10188	MODERATE
90734f64-0334-550c-b577-7fc6db288ca8	chr7:g.93886864G>A	Single base substitution	missense_variant TFPI2 R222C	4/412,0.97%	7/10188	MODERATE
907b450f-9fed-5400-a88e-508ad4ce09ff	chr1:g.42456903C>T	Single base substitution	missense_variant PPCS S113L	4/412,0.97%	5/10188	MODERATE
9ccc8ba8-7687-526b-841c-b7150cb31bb2	chr22:g.41155096C>T	Single base substitution	stop_gained EP300 Q1082*	4/412,0.97%	4/10188	HIGH
a61df1d5-3c82-54b7-a40d-f6d334ca9311	chr12:g.81143195C>T	Single base substitution	missense_variant ACSS3 S290L	4/412,0.97%	4/10188	MODERATE
c77a4520-a715-592e-886a-d8d68941f352	chr17:g.7675216C>G	Single base substitution	missense_variant TP53 K132N	4/412,0.97%	13/10188	MODERATE
cbdb9dff-08df-5c37-9be4-97886857f029	chr17:g.7670703C>A	Single base substitution	stop_gained TP53 E336*	4/412,0.97%	6/10188	HIGH
cd4f6864-fbb0-5456-b8cd-cfeda66565ce	chr3:g.49375451C>T	Single base substitution	missense_variant RHOA E47K	4/412,0.97%	7/10188	MODERATE
025fbf0f-ae88-548f-ad43-55091ee5753d	chr2:g.97792516C>T	Single base substitution	synonymous_variant TMEM131 A1338A	3/412,0.73%	4/10188	LOW
0b2141f1-56c7-5835-8e97-f028617edc47	chr19:g.45368961T>C	Single base substitution	missense_variant ERCC2 Y72C	3/412,0.73%	3/10188	MODERATE
0bec807e-b7fa-5692-b45d-5f204ff92db2	chr12:g.5969264G>A	Single base substitution	missense_variant VWF S2559L	3/412,0.73%	4/10188	MODERATE
0d236d9b-40fa-5553-bdf3-01253839faca	chr22:g.46463746C>T	Single base substitution	missense_variant CELSR1 E1382K	3/412,0.73%	3/10188	MODERATE
1061a085-efa4-5685-9c0a-ea6114693a4d	chr17:g.75828889C>T	Single base substitution	missense_variant UNC13D E1017K	3/412,0.73%	4/10188	MODERATE
129efb4b-c2ca-5b6b-b318-1215cd1a321c	chr3:g.192798931G>C	Single base substitution	missense_variant MB21D2 Q311E	3/412,0.73%	19/10188	MODERATE
18e5d99a-340d-5ba8-9427-d3d98ce7b118	chr19:g.49462658G>A	Single base substitution	missense_variant ALDH16A1 R334Q	3/412,0.73%	5/10188	MODERATE
1c4f26ec-e6fb-5ec4-a4ca-f78d8886e25e	chr7:g.148787094G>A	Single base substitution	missense_variant CUL1 E485K	3/412,0.73%	10/10188	MODERATE
1cae2038-843b-5fff-a9b4-84865d5629d0	chr7:g.149811982C>T	Single base substitution	missense_variant SSPO R3207W	3/412,0.73%	5/10188	MODERATE
27330cfc-9a43-5295-8f0a-21d957152b4c	chr12:g.56085070G>T	Single base substitution	missense_variant ERBB3 V104L	3/412,0.73%	4/10188	MODERATE
306e40af-0aa3-5375-b176-5307f79b4a39	chr1:g.149886428G>C	Single base substitution	missense_variant HIST2H2BE F71L	3/412,0.73%	8/10188	MODERATE
338957e4-75f2-56fa-a836-f4df51511d01	chr13:g.113422915G>A	Single base substitution	synonymous_variant ADPRHL1 L324L	3/412,0.73%	3/10188	LOW
36a02fdf-6ae4-5cd4-afc8-9d28fd4fd4a7	chr18:g.31157548C>G	Single base substitution	synonymous_variant DSC1 S58S	3/412,0.73%	3/10188	LOW
3b492980-101d-5f71-b7c2-75feb51d8d5d	chr12:g.56085033G>A	Single base substitution	missense_variant ERBB3 M91I	3/412,0.73%	3/10188	MODERATE
45573080-34e0-5d68-ab7d-8c84ab208912	chr15:g.90881570C>T	Single base substitution	missense_variant FURIN R693W	3/412,0.73%	3/10188	MODERATE
49183852-d0a7-57c0-a158-3133dd2b017a	chr11:g.533874T>A	Single base substitution	missense_variant HRAS Q61L	3/412,0.73%	8/10188	MODERATE
4b3af40a-8e94-5c5f-a618-15b3ce6178eb	chr6:g.36684129C>T	Single base substitution	stop_gained CDKN1A Q10*	3/412,0.73%	4/10188	HIGH
4fe982af-8696-5e02-9b8a-3d598c51cc33	chr2:g.10912898G>A	Single base substitution	missense_variant KCNF1 E158K	3/412,0.73%	5/10188	MODERATE
52ba9655-eb6c-54e2-9094-090916c6847a	chr6:g.36684210_36684211insT	Small insertion	frameshift_variant CDKN1A M38Nfs*10	3/412,0.73%	3/10188	HIGH
53af5705-a17b-555a-92e9-880ce5c14ca0	chr17:g.7673776G>A	Single base substitution	missense_variant TP53 R282W	3/412,0.73%	87/10188	MODERATE
54c2d3f2-be7e-55d3-aa9b-231a00b383d3	chr11:g.65054605C>T	Single base substitution	missense_variant NAALADL1 R246Q	3/412,0.73%	4/10188	MODERATE
5a9b5363-5d2b-58d5-8816-456e8f840092	chr11:g.533875G>T	Single base substitution	missense_variant HRAS Q61K	3/412,0.73%	11/10188	MODERATE
5c9c2899-07c4-584c-9734-42b52220f1f6	chr14:g.23567374C>T	Single base substitution	5_prime_UTR_variant AP1G2 None	3/412,0.73%	6/10188	MODIFIER
5caad9be-1671-5fd7-a970-1f1d82180836	chr12:g.14774425G>A	Single base substitution	5_prime_UTR_variant H2AFJ None	3/412,0.73%	4/10188	MODIFIER
5fa32dee-49df-5a34-9095-11db4ea34d1a	chr18:g.23530040G>A	Single base substitution	missense_variant C18orf8 E503K	3/412,0.73%	3/10188	MODERATE
65fa51eb-cee3-5d85-9472-c73617165f67	chr15:g.101759775G>T	Single base substitution	non_coding_transcript_exon_variant DNM1P47 None	3/412,0.73%	26/10188	MODIFIER
66c27877-3e05-5cff-93b1-6b03e0e8e244	chr14:g.49634390G>A	Single base substitution	missense_variant DNAAF2 R254C	3/412,0.73%	3/10188	MODERATE
686b1708-e8fc-5134-9abc-7d993dec5382	chr12:g.121016393C>T	Single base substitution	missense_variant C12orf43 E28K	3/412,0.73%	5/10188	MODERATE
7258154b-e6a2-5750-b107-10ca767bc9fc	chr11:g.67999225G>C	Single base substitution	missense_variant UNC93B1 S212C	3/412,0.73%	3/10188	MODERATE
74321b58-060e-5985-ad1a-fa20b01ea930	chr17:g.39711955C>A	Single base substitution	missense_variant ERBB2 S310Y	3/412,0.73%	5/10188	MODERATE
7677d804-34f1-58ed-872b-d07ea9fcaa43	chr4:g.1801837C>T	Single base substitution	missense_variant FGFR3 R248C	3/412,0.73%	5/10188	MODERATE
791c257e-b52b-532c-b965-c2944d7eb8f2	chr9:g.68303564A>C	Single base substitution	missense_variant FOXD4L3 K205Q	3/412,0.73%	10/10188	MODERATE
7a89e2f0-6dfc-5c8c-9cf7-f49c360f7164	chr15:g.101759755C>G	Single base substitution	non_coding_transcript_exon_variant DNM1P47 None	3/412,0.73%	29/10188	MODIFIER
7b636ea3-cd88-585e-97e8-3134e329b6a4	chr1:g.120833687T>C	Single base substitution	synonymous_variant NBPF26 C890C	3/412,0.73%	31/10188	LOW
8817d459-2406-53c3-928b-d89c77385445	chr16:g.56748290C>T	Single base substitution	stop_gained NUP93 Q15*	3/412,0.73%	7/10188	HIGH
88ed5182-dab9-556d-8bec-0f7dc3e743ec	chr19:g.45369122G>A	Single base substitution	missense_variant ERCC2 S44L	3/412,0.73%	3/10188	MODERATE
89106557-5291-5fc4-a0cd-525238c7b380	chr11:g.64220607G>A	Single base substitution	missense_variant FERMT3 E499K	3/412,0.73%	3/10188	MODERATE
8d1f296f-0788-56da-a3c2-636845acaaaf	chr6:g.26031667G>C	Single base substitution	missense_variant HIST1H3B R132G	3/412,0.73%	3/10188	MODERATE
8eb6748b-a741-548b-bcb9-a76d806f7cc7	chr11:g.130915733G>A	Single base substitution	synonymous_variant SNX19 L69L	3/412,0.73%	3/10188	LOW
8f88d0a7-2066-5681-86a0-3e98ac7d5cb3	chr12:g.53213560G>A	Single base substitution	synonymous_variant RARG L318L	3/412,0.73%	3/10188	LOW
94ae04b4-d8fc-5161-9393-f6acea2f5ef1	chr9:g.21971121G>A	Single base substitution	stop_gained CDKN2A R80*	3/412,0.73%	44/10188	HIGH
96f9f41d-7a53-5376-883e-1a1fbc701986	chr1:g.59674073C>G	Single base substitution	synonymous_variant FGGY S484S	3/412,0.73%	6/10188	LOW
987dc660-2579-5fb7-9510-a53ae8b7ecc1	chr1:g.58782737C>T	Single base substitution	missense_variant JUN E112K	3/412,0.73%	4/10188	MODERATE
9959e82c-88ee-5eaf-afc7-fccbb818d7d6	chr19:g.54143151G>A	Single base substitution	missense_variant CNOT3 E20K	3/412,0.73%	6/10188	MODERATE
a2c9ec3e-44e4-58e9-8b2b-f79060a41b5c	chr19:g.50702506C>T	Single base substitution	missense_variant SHANK1 E570K	3/412,0.73%	3/10188	MODERATE
a2d5e64e-0cf2-5e05-88ac-2b6296f0788b	chr17:g.36940809C>T	Single base substitution	synonymous_variant LHX1 F199F	3/412,0.73%	3/10188	LOW
a421be90-3c47-5775-bb05-23ebb1b8d6d7	chr17:g.7675139C>T	Single base substitution	missense_variant TP53 R158H	3/412,0.73%	18/10188	MODERATE
a6a7c3f9-c080-5a95-a507-ff5c79a9bebf	chr9:g.21971037C>T	Single base substitution	missense_variant CDKN2A D108N	3/412,0.73%	4/10188	MODERATE
a8f517c4-3622-5c66-b4cb-31db7251b0d4	chr10:g.45827364T>G	Single base substitution	missense_variant AGAP4 K181N	3/412,0.73%	64/10188	MODERATE
b11086f3-627e-5363-bc44-70dab27130d5	chr12:g.56088753G>A	Single base substitution	missense_variant ERBB3 E332K	3/412,0.73%	5/10188	MODERATE
bde86972-b22b-51dd-8024-cd558fa16c28	chr9:g.127196578G>A	Single base substitution	missense_variant RALGPS1 R381Q	3/412,0.73%	3/10188	MODERATE
bed307f7-6391-5934-a072-5deb57174bf7	chr6:g.1313108C>T	Single base substitution	missense_variant FOXQ1 S135L	3/412,0.73%	3/10188	MODERATE
c12fbe39-1611-559b-9e41-264c512c53e9	chr3:g.47577671C>T	Single base substitution	missense_variant CSPG5 D119N	3/412,0.73%	4/10188	MODERATE
c3041ce5-f052-5c7d-b2be-bd8d4a0f6f12	chr19:g.45370197T>C	Single base substitution	missense_variant ERCC2 Y14C	3/412,0.73%	3/10188	MODERATE
c6137c15-c9f1-5c00-83a0-a3647d7588ef	chr1:g.33096801C>T	Single base substitution	missense_variant AZIN2 S283L	3/412,0.73%	3/10188	MODERATE
c9c8cdb4-b112-525b-8a48-b719fa1a65be	chr1:g.201468543C>T	Single base substitution	missense_variant PHLDA3 E82K	3/412,0.73%	3/10188	MODERATE
ce888b44-2ccd-56a3-8dff-9bccbff7f18a	chr4:g.109816202G>C	Single base substitution	missense_variant GAR1 R13P	3/412,0.73%	3/10188	MODERATE
d44b906a-c39a-597b-89ac-93a931591c6c	chr17:g.37512326G>A	Single base substitution	missense_variant DUSP14 M18I	3/412,0.73%	3/10188	MODERATE
d5fa7f18-4c8a-502b-ad9b-ff47572fa648	chr17:g.7675136G>A	Single base substitution	missense_variant TP53 A159V	3/412,0.73%	16/10188	MODERATE
d7bb283c-d173-50b4-9c45-2e8b3e1f18c2	chr1:g.85582433C>T	Single base substitution	missense_variant CYR61 R218C	3/412,0.73%	3/10188	MODERATE
d975f362-5e5f-5e1f-bb1a-d63e75a8b651	chr3:g.153162653G>A	Single base substitution	5_prime_UTR_variant RAP2B None	3/412,0.73%	3/10188	MODIFIER
dba228ff-5c28-5d1e-a193-01b71bb4e7da	chr3:g.132352816G>A	Single base substitution	missense_variant ACPP E321K	3/412,0.73%	3/10188	MODERATE
e3daade0-bb25-59e5-b52d-f5546583b038	chr11:g.83166635G>A	Single base substitution	missense_variant PCF11 E580K	3/412,0.73%	3/10188	MODERATE
edb8f225-33eb-5a84-836a-9dde47ffe313	chr2:g.20447688C>A	Single base substitution	missense_variant RHOB P75T	3/412,0.73%	3/10188	MODERATE
f00043c6-265e-56d2-b0be-8330bb595754	chrX:g.45082613C>G	Single base substitution	stop_gained KDM6A S1061*	3/412,0.73%	3/10188	HIGH
f0f29e17-8e16-52a0-8dc6-44368cd594e3	chr8:g.131039885C>T	Single base substitution	missense_variant ADCY8 R150Q	3/412,0.73%	4/10188	MODERATE
f1f24aea-2afe-5f74-842a-302a53cdfb91	chr1:g.35190502G>A	Single base substitution	stop_gained SFPQ Q471*	3/412,0.73%	3/10188	HIGH
f67a6f79-ea57-5486-a726-53968147bf4f	chr1:g.8557518C>G	Single base substitution	missense_variant RERE K176N	3/412,0.73%	3/10188	MODERATE
f8c9c6fa-8c00-5480-bafc-87f612c2f779	chr12:g.8222464G>C	Single base substitution	synonymous_variant FAM90A1 L251L	3/412,0.73%	6/10188	LOW
f9e368f8-15d5-51ed-aad2-f6538b1e5226	chr17:g.65014793T>C	Single base substitution	missense_variant GNA13 R200G	3/412,0.73%	3/10188	MODERATE
001b1229-aa57-5a1d-b873-a459b47ea212	chr19:g.10378269G>A	Single base substitution	synonymous_variant TYK2 F46F	2/412,0.49%	2/10188	LOW
003b6b0c-b6e3-51a1-b943-55abe1cd6491	chr6:g.26273204G>A	Single base substitution	missense_variant HIST1H2BI E77K	2/412,0.49%	5/10188	MODERATE
00452ceb-8656-5556-a064-99ed6019bc74	chr17:g.7674921C>A	Single base substitution	stop_gained TP53 E204*	2/412,0.49%	11/10188	HIGH
0055b4e8-87a5-567c-86e4-f962ef848622	chr4:g.73419558G>A	Single base substitution	synonymous_variant ALB L568L	2/412,0.49%	2/10188	LOW
0056d201-2716-5317-b820-2ea6c964ba5f	chr19:g.42583298C>G	Single base substitution	missense_variant CEACAM8 R333T	2/412,0.49%	2/10188	MODERATE
0071b886-7ac9-5f6b-bd5e-e8150d266860	chr11:g.64835530C>T	Single base substitution	missense_variant CDC42BPG R617Q	2/412,0.49%	2/10188	MODERATE
007f1eef-7aeb-5b25-a248-383251c99c60	chr20:g.33767015C>T	Single base substitution	missense_variant ZNF341 H463Y	2/412,0.49%	2/10188	MODERATE
008ad56a-3007-5c8f-b4fc-52a0f260e028	chr1:g.26729690C>T	Single base substitution	stop_gained ARID1A Q393*	2/412,0.49%	3/10188	HIGH
008b6441-df5e-51b6-91fe-1b241b341f30	chr1:g.66984754G>C	Single base substitution	missense_variant MIER1 E465Q	2/412,0.49%	2/10188	MODERATE
00a1d8f6-5748-538c-bb27-02b90e2b231b	chr6:g.26031657C>G	Single base substitution	missense_variant HIST1H3B R135T	2/412,0.49%	2/10188	MODERATE
00b3a987-7ba5-5eae-8b53-e4f5278c24fb	chr8:g.22201144C>T	Single base substitution	intron_variant BMP1 None	2/412,0.49%	2/10188	MODIFIER
010203c4-40de-54da-801e-5adb811f0edc	chr8:g.144512921C>G	Single base substitution	missense_variant RECQL4 R894T	2/412,0.49%	2/10188	MODERATE
015cf315-d4df-5d1d-9861-267f7b23f8dc	chr12:g.109880321G>C	Single base substitution	missense_variant GLTP I18M	2/412,0.49%	2/10188	MODERATE
016cac28-251f-5ea7-a860-42199414f0d0	chr11:g.65505009G>A	Single base substitution	upstream_gene_variant MALAT1 None	2/412,0.49%	3/10188	MODIFIER
01e8b67b-22de-50dc-829b-832480c68db4	chr15:g.33819806A>G	Single base substitution	missense_variant RYR3 K3586R	2/412,0.49%	2/10188	MODERATE
01f14d9e-0ba8-5c30-8dec-4e1bb18c8085	chr7:g.149784890C>G	Single base substitution	missense_variant SSPO F923L	2/412,0.49%	2/10188	MODERATE
01fb80e3-6e56-57d8-98d8-8eb3ad63535e	chr10:g.45754995G>C	Single base substitution	missense_variant FAM21C E434Q	2/412,0.49%	2/10188	MODERATE
02219b08-e514-5a7f-8e0c-019b5b59b47f	chr16:g.84838439C>T	Single base substitution	5_prime_UTR_variant CRISPLD2 None	2/412,0.49%	2/10188	MODIFIER
02303ad5-03df-5e5b-9732-d3879ebb8e7e	chr4:g.7043778G>A	Single base substitution	missense_variant TADA2B E67K	2/412,0.49%	4/10188	MODERATE
025746dd-e83f-5995-9ced-26c219d13d29	chr3:g.100162315G>A	Single base substitution	missense_variant CMSS1 D80N	2/412,0.49%	2/10188	MODERATE
0271d15e-4df0-56c7-a056-e8d456483f03	chrX:g.16841767G>C	Single base substitution	3_prime_UTR_variant TXLNG None	2/412,0.49%	2/10188	MODIFIER
02beea6a-f80d-56c7-8f0b-aef387eca30e	chr1:g.155277777C>T	Single base substitution	missense_variant HCN3 R63W	2/412,0.49%	3/10188	MODERATE
02f366d0-62a4-5a65-ac9c-cf32129320d4	chr17:g.80140053C>G	Single base substitution	missense_variant EIF4A3 D154H	2/412,0.49%	2/10188	MODERATE
0307e876-6d60-5b1c-a0f2-9f969a0d4d62	chr17:g.39725079G>A	Single base substitution	missense_variant ERBB2 V842I	2/412,0.49%	17/10188	MODERATE
03423e87-2ad0-5291-89b0-bd1f279e4ef2	chr8:g.90001549C>T	Single base substitution	synonymous_variant DECR1 L19L	2/412,0.49%	3/10188	LOW
0352e20f-bc97-5507-9f44-7fb57d48e13e	chrX:g.96958050C>T	Single base substitution	missense_variant DIAPH2 P613S	2/412,0.49%	3/10188	MODERATE
0364bda6-61ab-5b81-ace4-d308ac8352cf	chr19:g.11950014C>G	Single base substitution	missense_variant ZNF700 Q664E	2/412,0.49%	2/10188	MODERATE
03976633-50d5-5fc3-b78b-31440de6f866	chr21:g.44901621G>A	Single base substitution	synonymous_variant ITGB2 F204F	2/412,0.49%	2/10188	LOW
03dd0961-0042-58cb-ad04-be48b7c4382d	chr15:g.90255797G>T	Single base substitution	non_coding_transcript_exon_variant TTLL13P None	2/412,0.49%	2/10188	MODIFIER
03fbd552-a43d-53cc-b098-1f36ed928547	chr9:g.132278213G>A	Single base substitution	synonymous_variant SETX F2233F	2/412,0.49%	2/10188	LOW
0488d9a1-3410-5fe0-9413-30913cadc32d	chr2:g.63885770G>C	Single base substitution	missense_variant UGP2 D253H	2/412,0.49%	2/10188	MODERATE
05019a20-d4dc-50d8-9cc2-f12f515a7240	chr3:g.39187953G>C	Single base substitution	missense_variant XIRP1 S498C	2/412,0.49%	2/10188	MODERATE
0516bf99-3f55-523f-9bf5-d708e58d18ca	chr2:g.29920035G>A	Single base substitution	missense_variant ALK R209C	2/412,0.49%	2/10188	MODERATE
0523c913-77c5-5149-8e23-1387def3b445	chr16:g.29664905G>A	Single base substitution	missense_variant SPN E393K	2/412,0.49%	2/10188	MODERATE
05281a0e-7714-545b-a77e-38154a84638b	chr11:g.108335096G>A	Single base substitution	missense_variant ATM R2713K	2/412,0.49%	2/10188	MODERATE
056e648e-07ad-5749-97bc-9147dadbf610	chr19:g.3590174G>C	Single base substitution	missense_variant GIPC3 R308T	2/412,0.49%	2/10188	MODERATE
058355fc-e909-5f04-a320-2a97b7eaccc5	chr8:g.23432995C>T	Single base substitution	synonymous_variant ENTPD4 R594R	2/412,0.49%	3/10188	LOW
06d34750-cf8d-514d-a491-4840ec6f5d40	chr10:g.34269742G>A	Single base substitution	stop_gained PARD3 Q1115*	2/412,0.49%	2/10188	HIGH
07276e78-8796-577a-9a57-198f54b5d618	chr19:g.35618137G>A	Single base substitution	missense_variant HAUS5 E255K	2/412,0.49%	2/10188	MODERATE
074a59be-1de4-52c4-8195-78e1fff09aec	chr20:g.51639455C>T	Single base substitution	missense_variant ATP9A R519Q	2/412,0.49%	2/10188	MODERATE
0783dffe-5f5c-56c8-b15d-58f0822a83b5	chr1:g.45515788G>C	Single base substitution	missense_variant PRDX1 F42L	2/412,0.49%	2/10188	MODERATE
07b11771-06c4-5a07-9394-541617d552a7	chr4:g.87663324C>T	Single base substitution	3_prime_UTR_variant DMP1 None	2/412,0.49%	2/10188	MODIFIER
07bc2d22-df82-5183-b20b-4e53ab2494fb	chrX:g.15790958G>A	Single base substitution	synonymous_variant ZRSR2 L22L	2/412,0.49%	2/10188	LOW
07c09bff-4c32-56f1-bea0-ce8f9a5912f3	chrX:g.71251193C>G	Single base substitution	missense_variant ZMYM3 D255H	2/412,0.49%	2/10188	MODERATE
07e5003f-f4cc-5f51-8cd2-18ba9920bc27	chr16:g.89749855G>A	Single base substitution	synonymous_variant FANCA L1038L	2/412,0.49%	2/10188	LOW
0842715b-6a25-5c8b-81e1-3943ccc1588c	chr2:g.79121690G>A	Single base substitution	intron_variant REG1A None	2/412,0.49%	3/10188	MODIFIER
0875db6e-9dd4-5849-b400-087d8cce3ee1	chr18:g.65880643G>C	Single base substitution	missense_variant CDH7 D703H	2/412,0.49%	2/10188	MODERATE
08aa92a4-a0c2-5b53-9ee5-84327e694f99	chr19:g.44081136C>T	Single base substitution	missense_variant ZNF284 S46L	2/412,0.49%	2/10188	MODERATE
092ba7ce-e749-575c-aab5-526f850fc92f	chr19:g.45472937C>T	Single base substitution	synonymous_variant FOSB F314F	2/412,0.49%	2/10188	LOW
0aa0250d-1d25-538d-bf59-18aa67b2c739	chr22:g.26292990G>A	Single base substitution	missense_variant SEZ6L D227N	2/412,0.49%	2/10188	MODERATE
0aca3470-c5ae-5add-b312-98712683f4ce	chr1:g.202013201G>C	Single base substitution	missense_variant ELF3 K236N	2/412,0.49%	2/10188	MODERATE
0b0aadad-ffb3-5049-b97d-e2524265c299	chr11:g.46616074G>A	Single base substitution	missense_variant HARBI1 A55V	2/412,0.49%	2/10188	MODERATE
0be852ae-1c3f-5ecc-9544-c29b399b806c	chr2:g.95149751G>A	Single base substitution	missense_variant ZNF514 S245L	2/412,0.49%	2/10188	MODERATE
0c4a14f9-2e65-52c9-b9be-b1031eb38a15	chr17:g.7321750G>A	Single base substitution	missense_variant NEURL4 S970F	2/412,0.49%	3/10188	MODERATE
0ccc515f-0048-52fc-bf57-bc690463ae7f	chr3:g.97877312G>A	Single base substitution	missense_variant CRYBG3 E2040K	2/412,0.49%	2/10188	MODERATE
0d1e80ed-6330-5195-95c0-27a285727084	chr7:g.99679910C>T	Single base substitution	5_prime_UTR_variant CYP3A5 None	2/412,0.49%	2/10188	MODIFIER
0d458797-cb56-523b-bd8e-b7d6a14cedec	chr19:g.12647567G>A	Single base substitution	missense_variant MAN2B1 S899L	2/412,0.49%	4/10188	MODERATE
0e56f331-101d-5a59-90a8-c46307ef3fd3	chr7:g.47304907G>A	Single base substitution	missense_variant TNS3 S916L	2/412,0.49%	2/10188	MODERATE
0f1ac996-d63d-5eee-9eb5-187564156211	chr8:g.101492706G>A	Single base substitution	5_prime_UTR_variant GRHL2 None	2/412,0.49%	2/10188	MODIFIER
0f77b9e2-95d6-5314-abcc-bd354b41e685	chr16:g.4874781C>T	Single base substitution	missense_variant UBN1 H791Y	2/412,0.49%	3/10188	MODERATE
0f8c83c4-01a5-5491-8cec-66d7e892ae27	chr8:g.109563399C>G	Single base substitution	intron_variant EBAG9 None	2/412,0.49%	2/10188	MODIFIER
0f90e393-7e99-5edf-b675-7964e3294584	chr7:g.78256239G>A	Single base substitution	missense_variant MAGI2 P584L	2/412,0.49%	2/10188	MODERATE
0fd69b5b-40e8-5479-95c9-61a9fef7c186	chr7:g.101163547C>T	Single base substitution	missense_variant VGF E433K	2/412,0.49%	2/10188	MODERATE
101cecd5-823c-54cb-91f6-9d7df16c9443	chr17:g.38330155C>T	Single base substitution	synonymous_variant GPR179 V1138V	2/412,0.49%	2/10188	LOW
108a7b72-384d-55c1-9011-b58fb3f4a8c5	chr16:g.30353966C>G	Single base substitution	missense_variant CD2BP2 D104H	2/412,0.49%	2/10188	MODERATE
10bc34e6-5f7e-5e8b-970a-a8fcbd5f5563	chr11:g.534286C>G	Single base substitution	missense_variant HRAS G13R	2/412,0.49%	10/10188	MODERATE
10de2fc6-6ec8-55f5-a59d-c027035454bd	chr1:g.145961476G>A	Single base substitution	missense_variant ANKRD34A S95L	2/412,0.49%	3/10188	MODERATE
11628f69-5b1c-5d3e-ad96-0c84fd5257b1	chr7:g.85042286C>G	Single base substitution	splice_acceptor_variant SEMA3D X288_splice	2/412,0.49%	2/10188	HIGH
11713da4-a203-5b6c-8823-1b7c6db52a8f	chr1:g.107056907C>T	Single base substitution	synonymous_variant PRMT6 R64R	2/412,0.49%	2/10188	LOW
118d42f2-6706-5ab3-9df8-15de1e2a29f1	chr4:g.83536699C>T	Single base substitution	missense_variant AGPAT9 S26L	2/412,0.49%	2/10188	MODERATE
11bcc7f9-fde7-59a2-ac69-b2ca5e6eed46	chrX:g.45083494delC	Small deletion	frameshift_variant KDM6A P1107Lfs*13	2/412,0.49%	2/10188	HIGH
1262c0a2-ebd2-5f4b-ba28-638925395613	chr19:g.12363582G>C	Single base substitution	missense_variant ZNF442 S17C	2/412,0.49%	2/10188	MODERATE
128787db-5ff4-55de-989e-94c44be6e979	chr1:g.149005170C>G	Single base substitution	stop_gained PDE4DIP S1383*	2/412,0.49%	2/10188	HIGH
12d988cc-8513-599e-8ee1-5be6870ae6da	chr1:g.248850206G>C	Single base substitution	3_prime_UTR_variant ZNF692 None	2/412,0.49%	2/10188	MODIFIER
131b0b03-2b34-57c8-b385-dd2de18c75d6	chr12:g.120716714C>G	Single base substitution	missense_variant UNC119B L149V	2/412,0.49%	2/10188	MODERATE
133b401c-8383-531a-8cc4-f2765caacc91	chr3:g.132722280C>T	Single base substitution	missense_variant NPHP3 E26K	2/412,0.49%	2/10188	MODERATE
1371d949-3b6e-5de4-a419-10d68c167734	chr22:g.29351722G>C	Single base substitution	missense_variant AP1B1 Q348E	2/412,0.49%	2/10188	MODERATE
13f3ec84-5543-5bdf-9e38-4e8010751a03	chr7:g.47428345G>A	Single base substitution	missense_variant TNS3 S119L	2/412,0.49%	2/10188	MODERATE
140de989-65c4-517b-a332-92d19ed5b6c8	chr1:g.160711709G>A	Single base substitution	synonymous_variant CD48 L19L	2/412,0.49%	2/10188	LOW
1443a54f-d13d-5a44-9ebf-1d637f894187	chr17:g.41516905C>T	Single base substitution	missense_variant KRT15 R214Q	2/412,0.49%	3/10188	MODERATE
14a95012-3354-5d0b-b52d-6803ee3f33f2	chr7:g.99499924G>A	Single base substitution	missense_variant ZNF394 S57L	2/412,0.49%	2/10188	MODERATE
14c6cbcb-bb4f-590b-90ae-f03d706c8c0b	chr19:g.45884607C>T	Single base substitution	missense_variant IRF2BP1 E390K	2/412,0.49%	2/10188	MODERATE
14e16532-656c-5471-93df-bb00f148c487	chr7:g.101040246G>C	Single base substitution	missense_variant MUC17 E2944Q	2/412,0.49%	2/10188	MODERATE
14e82b67-d26e-5678-a06c-c1d66c93f2e2	chr7:g.142618952C>G	Single base substitution	5_prime_UTR_variant TRBV19 None	2/412,0.49%	2/10188	MODIFIER
14fb1059-3563-5f32-856f-f9ff433a3025	chr12:g.52381432C>T	Single base substitution	missense_variant KRT84 E336K	2/412,0.49%	2/10188	MODERATE
15036199-446b-5df2-9669-5ca0dd7caa1c	chrX:g.71118851G>A	Single base substitution	missense_variant MED12 E33K	2/412,0.49%	2/10188	MODERATE
150956d5-5bc1-5bf4-9cc1-b6d2471623fb	chr1:g.209632608G>A	Single base substitution	missense_variant LAMB3 S266F	2/412,0.49%	2/10188	MODERATE
15694d60-96ab-5084-8ec4-c73119ece8c0	chr17:g.7674230C>T	Single base substitution	missense_variant TP53 G245S	2/412,0.49%	42/10188	MODERATE
15ab29f0-f7e5-52f3-a885-4fb4b9e8a15e	chr20:g.46241168C>G	Single base substitution	synonymous_variant CDH22 L115L	2/412,0.49%	2/10188	LOW
15cc2224-8760-591e-a6fa-deebb1968f49	chr11:g.116762882G>A	Single base substitution	missense_variant BUD13 S236L	2/412,0.49%	2/10188	MODERATE
162b00ff-dcfe-5ce0-ba4f-477bfc148f82	chr17:g.31530459C>T	Single base substitution	missense_variant RAB11FIP4 S596L	2/412,0.49%	3/10188	MODERATE
166bffc2-3962-53a6-b0e1-a019b6ee5cba	chr3:g.146533530G>T	Single base substitution	missense_variant PLSCR1 H12N	2/412,0.49%	2/10188	MODERATE
16745174-1eb0-5737-9a0e-62b67f247dfc	chr6:g.107459230G>A	Single base substitution	missense_variant PDSS2 S19F	2/412,0.49%	2/10188	MODERATE
1699eb4e-4e32-51a5-b069-f59b20e2bcbd	chr6:g.18122555C>G	Single base substitution	missense_variant NHLRC1 E18Q	2/412,0.49%	2/10188	MODERATE
16f202ff-d854-5be6-9c9c-d50d0b118bf3	chr18:g.50284040C>T	Single base substitution	missense_variant CXXC1 E423K	2/412,0.49%	2/10188	MODERATE
170af048-6f27-594b-a9ba-124c05f78ed8	chr5:g.141178728G>A	Single base substitution	missense_variant PCDHB8 E232K	2/412,0.49%	3/10188	MODERATE
17156771-001c-556f-85cb-562a78e3d2fe	chr19:g.8552152C>G	Single base substitution	missense_variant MYO1F E173Q	2/412,0.49%	2/10188	MODERATE
17314d6e-f569-558b-aa99-ba7dd4771cd2	chr7:g.87369375G>C	Single base substitution	splice_acceptor_variant CROT X183_splice	2/412,0.49%	2/10188	HIGH
174958ee-1e08-5ed0-8de0-94a8a21f06e0	chr3:g.119492481C>T	Single base substitution	3_prime_UTR_variant POGLUT1 None	2/412,0.49%	2/10188	MODIFIER
1749a259-5bdf-565c-b54c-07b99f6bf835	chr2:g.99582911C>T	Single base substitution	missense_variant AFF3 E894K	2/412,0.49%	3/10188	MODERATE
17b33700-f27e-51c5-910d-c36af719aa1e	chr12:g.10809284C>G	Single base substitution	missense_variant TAS2R9 L264F	2/412,0.49%	2/10188	MODERATE
17e69731-a6f6-57d6-9c3b-2c7c6818b236	chr7:g.99493630C>G	Single base substitution	missense_variant ZNF394 E529Q	2/412,0.49%	2/10188	MODERATE
18163bb9-e181-5a2a-a5ca-b154ec69ceeb	chr7:g.74519626C>G	Single base substitution	missense_variant GTF2IRD1 P275A	2/412,0.49%	2/10188	MODERATE
18214c83-b5a9-56b6-81e9-1294a8dc6451	chr4:g.152326013G>A	Single base substitution	missense_variant FBXW7 S546L	2/412,0.49%	2/10188	MODERATE
18540bd4-1c0a-5ef0-a414-6073289ee80a	chr10:g.122086259G>A	Single base substitution	synonymous_variant TACC2 V1253V	2/412,0.49%	3/10188	LOW
185b46de-39c4-58d0-a583-cd1965b79dbc	chr7:g.133253163C>A	Single base substitution	stop_gained EXOC4 S21*	2/412,0.49%	2/10188	HIGH
19016a6d-da57-5a98-933a-9e93c0171a1f	chr19:g.57727412C>T	Single base substitution	synonymous_variant ZNF671 A39A	2/412,0.49%	3/10188	LOW
190b36ce-3301-580b-8352-55967d9f5022	chr6:g.7229303C>T	Single base substitution	stop_gained RREB1 Q402*	2/412,0.49%	2/10188	HIGH
1940a189-bd24-5250-a67e-a70f675e6ab5	chr1:g.154983787C>G	Single base substitution	synonymous_variant FLAD1 L31L	2/412,0.49%	2/10188	LOW
1961e6d3-c6d9-546a-abe8-babba44cc52c	chr5:g.6737598G>A	Single base substitution	missense_variant PAPD7 E19K	2/412,0.49%	8/10188	MODERATE
19632310-f935-5a9d-9c7d-218fb7040d01	chr17:g.46978753G>A	Single base substitution	synonymous_variant RPRML F85F	2/412,0.49%	2/10188	LOW
19985e0e-7831-5d95-9528-d4361ea445a2	chr6:g.112155609C>T	Single base substitution	missense_variant LAMA4 E639K	2/412,0.49%	2/10188	MODERATE
1a3d7812-e4f8-54b5-a17e-0d9d72f7ffce	chr1:g.39410388G>A	Single base substitution	intron_variant MACF1 None	2/412,0.49%	2/10188	MODIFIER
1a71660b-16b1-5c65-b5c7-54b188f590dc	chr16:g.55656842G>A	Single base substitution	missense_variant SLC6A2 D50N	2/412,0.49%	2/10188	MODERATE
1a71a81c-3797-51af-8ec5-3569cbe0c77d	chr20:g.59996542G>A	Single base substitution	intron_variant CDH26 None	2/412,0.49%	2/10188	MODIFIER
1a843bcc-2775-5fef-8ba5-fd9497c59621	chr22:g.20995754C>G	Single base substitution	missense_variant LZTR1 L651V	2/412,0.49%	2/10188	MODERATE
1b2ea042-6259-5cb8-bb75-c940f5403b81	chr20:g.45208284G>A	Single base substitution	synonymous_variant SEMG1 Q329Q	2/412,0.49%	2/10188	LOW
1b96c0f9-c335-56ae-b916-d61be5a245d0	chr19:g.55316919G>A	Single base substitution	synonymous_variant TMEM150B F124F	2/412,0.49%	2/10188	LOW
1bc37058-062f-5893-8472-1fb8f1c270a2	chr8:g.143817103G>A	Single base substitution	missense_variant PUF60 S396L	2/412,0.49%	2/10188	MODERATE
1c168779-c52f-5b00-b998-296f27552119	chr2:g.9412310C>G	Single base substitution	missense_variant ITGB1BP1 E83Q	2/412,0.49%	2/10188	MODERATE
1c6b272e-f84c-5127-9d6d-b7fa722f5a61	chr11:g.59443806C>T	Single base substitution	missense_variant OR5A1 S213L	2/412,0.49%	2/10188	MODERATE
1ceb2047-3fe5-5b03-8e18-d67e57fa407f	chr5:g.151554632G>A	Single base substitution	synonymous_variant FAT2 T1225T	2/412,0.49%	2/10188	LOW
1d47d4d7-db55-5880-b5f4-3c33448672d3	chr1:g.26773899G>A	Single base substitution	splice_donor_variant ARID1A X1367_splice	2/412,0.49%	2/10188	HIGH
1d6df097-c265-58b9-a62c-aef679ab15df	chr4:g.1804365A>T	Single base substitution	missense_variant FGFR3 S371C	2/412,0.49%	2/10188	MODERATE
1dcaf339-de3d-5f8f-9b62-8762aefde286	chr2:g.223597821C>G	Single base substitution	missense_variant SCG2 E488Q	2/412,0.49%	2/10188	MODERATE
1dd189a3-3f1f-5453-b83b-39ba92771882	chr2:g.26278724G>C	Single base substitution	missense_variant HADHB D185H	2/412,0.49%	2/10188	MODERATE
1de2de57-58f4-55a1-b077-e260ac02347a	chr19:g.39892056C>T	Single base substitution	missense_variant FCGBP R2196H	2/412,0.49%	2/10188	MODERATE
1df8649a-6729-52b9-96bc-3b4421bf7a0e	chr2:g.20447604G>A	Single base substitution	missense_variant RHOB E47K	2/412,0.49%	2/10188	MODERATE
1e1fa5d7-2af4-55b8-8bba-7321a12401f1	chr14:g.102036593G>A	Single base substitution	missense_variant DYNC1H1 R3620K	2/412,0.49%	2/10188	MODERATE
1eae88b1-0d79-5b94-a140-7dad763a0999	chr16:g.9829485G>A	Single base substitution	synonymous_variant GRIN2A L649L	2/412,0.49%	2/10188	LOW
1eed3755-0cac-5fde-95a2-a659cadc8ad4	chr19:g.11436044G>A	Single base substitution	upstream_gene_variant PRKCSH None	2/412,0.49%	2/10188	MODIFIER
1f04e19d-e746-5b69-94e6-043f0bfa631f	chr22:g.15690296G>A	Single base substitution	synonymous_variant POTEH R73R	2/412,0.49%	13/10188	LOW
1f28664f-5041-5e31-ae86-f37b5860d8ca	chr16:g.2762135C>T	Single base substitution	missense_variant SRRM2 S536F	2/412,0.49%	2/10188	MODERATE
1f388c56-1016-5863-9ae4-a5c70f67878c	chr3:g.49896324C>T	Single base substitution	synonymous_variant MST1R G840G	2/412,0.49%	2/10188	LOW
1f4a6b23-6f89-5e63-a632-97c563a65ddc	chr4:g.99581951C>G	Single base substitution	synonymous_variant MTTP L36L	2/412,0.49%	3/10188	LOW
1f71be81-ab27-5999-be5b-2b607f8b3529	chr22:g.50529687C>T	Single base substitution	missense_variant TYMP G8E	2/412,0.49%	2/10188	MODERATE
1f7fb61c-eca9-512f-be2b-17014b463e42	chr22:g.50281519C>T	Single base substitution	intron_variant PLXNB2 None	2/412,0.49%	2/10188	MODIFIER
1f9e6946-675b-5786-909f-2ae56e7187a4	chr1:g.151705852C>T	Single base substitution	missense_variant CELF3 D414N	2/412,0.49%	2/10188	MODERATE
2029ed85-e8b5-59ca-8cfd-5773fa7a2813	chr11:g.62521968G>A	Single base substitution	missense_variant AHNAK S4150F	2/412,0.49%	2/10188	MODERATE
20745715-e517-5ed8-ab7a-7642ef9dfff2	chr11:g.70206293G>C	Single base substitution	missense_variant FADD K149N	2/412,0.49%	2/10188	MODERATE
20be2184-11b6-5ee1-9bc6-aec64b567133	chr15:g.59058452C>T	Single base substitution	missense_variant RNF111 S423F	2/412,0.49%	2/10188	MODERATE
20bec942-f753-514d-b2db-102315a02659	chr1:g.26732713C>T	Single base substitution	missense_variant ARID1A S614L	2/412,0.49%	2/10188	MODERATE
20efa1f2-36b2-5a84-b617-3850c566b0e0	chr7:g.98994638G>C	Single base substitution	missense_variant TRRAP E3353Q	2/412,0.49%	2/10188	MODERATE
2121b2eb-a899-52b5-9cb7-e5accd266194	chr17:g.48033866C>G	Single base substitution	missense_variant COPZ2 E89Q	2/412,0.49%	3/10188	MODERATE
21a8a430-9fc5-5320-bef8-3ea1bffda5c8	chr1:g.92244331C>T	Single base substitution	missense_variant C1orf146 S92F	2/412,0.49%	2/10188	MODERATE
21ae033b-5d7e-56a0-befa-c49627ffd9f1	chr16:g.31184330C>T	Single base substitution	stop_gained FUS Q153*	2/412,0.49%	2/10188	HIGH
21e24d64-3a2a-5a71-80fc-9fb8ccab8ef8	chr6:g.26022003C>T	Single base substitution	upstream_gene_variant HIST1H1A None	2/412,0.49%	2/10188	MODIFIER
222efd41-f1df-5eae-ae83-34908a0f1801	chr12:g.11884474C>G	Single base substitution	missense_variant ETV6 Q347E	2/412,0.49%	2/10188	MODERATE
225ab5c4-b17c-5e54-89f7-df482a49bacb	chr12:g.122854068C>T	Single base substitution	synonymous_variant HIP1R I201I	2/412,0.49%	2/10188	LOW
2282c9e4-8258-5216-a1bd-f9cd0cf1db14	chr17:g.45267662C>T	Single base substitution	synonymous_variant MAP3K14 P690P	2/412,0.49%	4/10188	LOW
228c5b29-2e6c-52e5-9188-35ad5021cdc0	chr3:g.12392623C>T	Single base substitution	missense_variant PPARG R164W	2/412,0.49%	2/10188	MODERATE
22be7627-84d5-5c65-b999-5284eccba7ea	chr7:g.144318529G>A	Single base substitution	missense_variant OR2A1 M135I	2/412,0.49%	2/10188	MODERATE
22cf70ae-7399-54a1-9cb5-cca961483f51	chr12:g.2633667C>T	Single base substitution	synonymous_variant CACNA1C L1309L	2/412,0.49%	2/10188	LOW
22e1b3fe-b870-5221-b178-e9a8914b1109	chr2:g.27079144C>G	Single base substitution	missense_variant EMILIN1 R27G	2/412,0.49%	2/10188	MODERATE
22f135dd-1705-517f-afdd-3302b969bee8	chr6:g.36684247G>A	Single base substitution	stop_gained CDKN1A W49*	2/412,0.49%	2/10188	HIGH
23101762-f86a-57e1-8d8a-f6237bc3b99e	chr10:g.121479994C>T	Single base substitution	missense_variant FGFR2 E777K	2/412,0.49%	4/10188	MODERATE
23314465-fe74-5aee-b26a-a1a9b361c664	chr17:g.50358483G>A	Single base substitution	missense_variant XYLT2 E740K	2/412,0.49%	2/10188	MODERATE
2351e26d-27ce-57c8-a372-55f7173f433c	chr12:g.49039611G>A	Single base substitution	stop_gained KMT2D R2685*	2/412,0.49%	2/10188	HIGH
2372f1ce-d685-5451-affe-c119f2c1e298	chr19:g.18573370G>C	Single base substitution	missense_variant UBA52 E24Q	2/412,0.49%	2/10188	MODERATE
23c5cea0-02a0-5baf-9042-38f74332b036	chr21:g.44967122C>T	Single base substitution	synonymous_variant FAM207A L147L	2/412,0.49%	2/10188	LOW
23ee511e-f574-5e93-9db3-cf91f8c2d72b	chr22:g.37927558C>G	Single base substitution	stop_gained MICALL1 S538*	2/412,0.49%	2/10188	HIGH
24744af7-03d6-5b41-9154-9091c2011ba0	chr10:g.87864518C>T	Single base substitution	stop_gained PTEN Q17*	2/412,0.49%	4/10188	HIGH
24f59fb8-a0d8-55e0-9979-21f69c814b5a	chr17:g.28563894G>C	Single base substitution	missense_variant PIGS I100M	2/412,0.49%	2/10188	MODERATE
25128999-f4cf-5a7c-9bdc-5c09e86be36f	chr1:g.152306251C>G	Single base substitution	missense_variant FLG E2879Q	2/412,0.49%	2/10188	MODERATE
25686969-55f4-5265-8ff0-514ea3d6baef	chr19:g.32353048C>G	Single base substitution	stop_gained ZNF507 S73*	2/412,0.49%	2/10188	HIGH
2570c72c-102b-5c1e-9b2a-aaa6de8588a7	chr10:g.103447509G>C	Single base substitution	synonymous_variant CALHM2 L205L	2/412,0.49%	2/10188	LOW
25a864a6-c4f8-5e38-b6d4-567036456c91	chr6:g.118911722G>C	Single base substitution	missense_variant MCM9 Q360E	2/412,0.49%	2/10188	MODERATE
260c55de-cad5-55bc-a797-056c92bbffff	chr19:g.10159956G>C	Single base substitution	intron_variant DNMT1 None	2/412,0.49%	2/10188	MODIFIER
261f1db1-c811-5cef-9a96-0f6e6d2bdfc9	chr7:g.23585223C>T	Single base substitution	non_coding_transcript_exon_variant CLK2P1 None	2/412,0.49%	3/10188	MODIFIER
26588861-690d-5bc5-978f-c5bfa3b53d48	chr10:g.31520332G>C	Single base substitution	missense_variant ZEB1 E333Q	2/412,0.49%	2/10188	MODERATE
267b5be9-e5f7-506f-9d3d-de248dc2598e	chr4:g.109945220G>A	Single base substitution	synonymous_variant EGF L295L	2/412,0.49%	2/10188	LOW
2698cb69-0a4a-55bf-8236-27d8a8523aba	chr7:g.130051255C>T	Single base substitution	missense_variant ZC3HC1 E38K	2/412,0.49%	2/10188	MODERATE
26ae5894-0da4-5e80-a877-2815ba7cb471	chr3:g.12909306C>T	Single base substitution	missense_variant IQSEC1 E863K	2/412,0.49%	2/10188	MODERATE
26d6a2b0-be50-530c-8801-93dabeafe7e0	chr19:g.53070092C>T	Single base substitution	missense_variant ZNF160 D148N	2/412,0.49%	2/10188	MODERATE
27083c87-6edd-5779-b0fe-98c8f740f832	chr3:g.184038817G>A	Single base substitution	missense_variant HTR3D E403K	2/412,0.49%	2/10188	MODERATE
270da272-9551-5cf5-930d-26becacf3de6	chr11:g.6401472G>C	Single base substitution	intron_variant APBB1 None	2/412,0.49%	2/10188	MODIFIER
27161f37-a0c4-5a2d-88a9-6386ed3a05f3	chr16:g.87414509G>A	Single base substitution	missense_variant ZCCHC14 S366L	2/412,0.49%	2/10188	MODERATE
271ec583-d175-5862-af0c-6027361e57f2	chr14:g.91234786G>T	Single base substitution	missense_variant GPR68 H89N	2/412,0.49%	2/10188	MODERATE
274eb14a-c2cc-5647-8a3e-8a27e2fd8169	chr7:g.129755091G>A	Single base substitution	synonymous_variant NRF1 Q474Q	2/412,0.49%	2/10188	LOW
278aab39-4da8-543d-85fa-65e05167b5a3	chr4:g.1806162A>G	Single base substitution	missense_variant FGFR3 K650E	2/412,0.49%	3/10188	MODERATE
27c52a4b-997c-5b30-915f-dceb58d20d52	chr14:g.62981136G>C	Single base substitution	missense_variant KCNH5 F226L	2/412,0.49%	2/10188	MODERATE
2837238a-47c6-58af-8f71-5e7296892b15	chr4:g.47572230G>A	Single base substitution	splice_region_variant ATP10D Q1080Q	2/412,0.49%	2/10188	LOW
287c83f1-f93f-5ce2-9d34-5416c63f984f	chr6:g.41940954G>A	Single base substitution	intron_variant CCND3 None	2/412,0.49%	2/10188	MODIFIER
2880e082-83d6-5b27-81ed-5d7dff4bc3b5	chr12:g.132777035C>T	Single base substitution	missense_variant GOLGA3 E1260K	2/412,0.49%	3/10188	MODERATE
2886b805-8250-50b9-bc06-b2ba65793373	chr6:g.29044911C>G	Single base substitution	missense_variant OR2W1 D89H	2/412,0.49%	2/10188	MODERATE
28995a5a-da4e-5f11-bd51-a9e04e9b9985	chr6:g.26055889C>T	Single base substitution	synonymous_variant HIST1H1C A180A	2/412,0.49%	6/10188	LOW
28a19c33-d1fa-5bba-a586-43384a40a84b	chr11:g.69641435C>T	Single base substitution	missense_variant CCND1 S41L	2/412,0.49%	2/10188	MODERATE
28c7557f-e06a-5a82-8efa-3d25d058bca4	chr2:g.48580962C>T	Single base substitution	missense_variant STON1 S110L	2/412,0.49%	2/10188	MODERATE
290cc045-4c92-5b7a-a21a-a6b026215e17	chr20:g.4869831C>T	Single base substitution	intron_variant SLC23A2 None	2/412,0.49%	2/10188	MODIFIER
29211917-26f6-502c-b58b-95b5c3d2fd69	chr3:g.139476445C>G	Single base substitution	missense_variant RBP2 Q5H	2/412,0.49%	2/10188	MODERATE
297057fd-d65a-5a3d-879b-139ed90bfc90	chr8:g.109448344T>C	Single base substitution	missense_variant PKHD1L1 V1993A	2/412,0.49%	2/10188	MODERATE
297b2126-5f06-5f4a-8505-6b4a18b6e7b1	chr6:g.35510919C>G	Single base substitution	synonymous_variant TULP1 L147L	2/412,0.49%	2/10188	LOW
2989ee12-2c09-54d1-8abd-3636fdb8ce5a	chr4:g.84648696G>C	Single base substitution	3_prime_UTR_variant CDS1 None	2/412,0.49%	2/10188	MODIFIER
29e083e6-589e-53eb-b78c-5693012aa04f	chr6:g.31580700C>T	Single base substitution	3_prime_UTR_variant LTB None	2/412,0.49%	2/10188	MODIFIER
2a04d22b-f750-543a-bb14-fb9e1d2dc917	chr19:g.6692942C>T	Single base substitution	synonymous_variant C3 V1124V	2/412,0.49%	2/10188	LOW
2a07e705-13f6-5e39-b7c5-9e43d0f8bcfd	chr7:g.101163168G>A	Single base substitution	missense_variant VGF S559L	2/412,0.49%	3/10188	MODERATE
2a1b2db6-5e32-5120-a689-86d6fa341018	chr2:g.144389816C>T	Single base substitution	missense_variant ZEB2 E1094K	2/412,0.49%	5/10188	MODERATE
2a6a1a30-4fc2-5143-be93-d426eee4bb60	chr12:g.40283941G>A	Single base substitution	missense_variant LRRK2 D770N	2/412,0.49%	2/10188	MODERATE
2ae6c82c-ffda-5ab5-97dc-08f78aec2d81	chr6:g.11778763G>A	Single base substitution	5_prime_UTR_variant ADTRP None	2/412,0.49%	2/10188	MODIFIER
2b110f18-0145-55aa-93f5-accec793c9c1	chr18:g.37259182G>A	Single base substitution	splice_region_variant CELF4 F444F	2/412,0.49%	3/10188	LOW
2b759c9d-6ec0-563b-8bc6-93f18537a62b	chr20:g.20075492C>G	Single base substitution	stop_gained CFAP61 S148*	2/412,0.49%	2/10188	HIGH
2b91fc81-e3dc-5a2b-8e76-854338c41470	chr16:g.67649500C>T	Single base substitution	synonymous_variant RLTPR V600V	2/412,0.49%	2/10188	LOW
2b97564c-10fe-52be-a6b2-8ddc3c4d5d0e	chr16:g.31962172T>G	Single base substitution	non_coding_transcript_exon_variant RP11-170L3.7 None	2/412,0.49%	9/10188	MODIFIER
2bfe1a02-b980-5c88-9db8-21347a689e6e	chr16:g.75112407G>C	Single base substitution	synonymous_variant LDHD L491L	2/412,0.49%	2/10188	LOW
2c09f179-930e-531f-9f0d-700b3aeb1411	chr17:g.74745187C>G	Single base substitution	intron_variant RAB37 None	2/412,0.49%	2/10188	MODIFIER
2c4a2f89-723e-5b07-95e0-a1342df61503	chr3:g.58163341C>G	Single base substitution	intron_variant FLNB None	2/412,0.49%	2/10188	MODIFIER
2c7e694f-5eaf-57df-8e9c-89f65811ca40	chr1:g.40258169C>T	Single base substitution	5_prime_UTR_variant ZMPSTE24 None	2/412,0.49%	3/10188	MODIFIER
2cc2fb5d-52c9-5741-8d8e-c70db4af6a7b	chr17:g.75020566G>A	Single base substitution	missense_variant ICT1 D149N	2/412,0.49%	3/10188	MODERATE
2cfbff78-8700-5864-8189-d6243b3ceea7	chr7:g.2433507G>A	Single base substitution	missense_variant CHST12 E290K	2/412,0.49%	2/10188	MODERATE
2d3e0329-410a-5901-971f-c6393e689a14	chr2:g.119656414G>A	Single base substitution	missense_variant CFAP221 E823K	2/412,0.49%	2/10188	MODERATE
2d489591-5cee-5c16-a339-7acf150bc78e	chrX:g.153768945C>G	Single base substitution	splice_region_variant PLXNB3 None	2/412,0.49%	2/10188	LOW
2de7749a-1b67-5b3b-9b02-21681786eb56	chr12:g.8604839G>T	Single base substitution	missense_variant AICDA R171S	2/412,0.49%	2/10188	MODERATE
2e8f5524-0084-561b-b3db-db9610466981	chr22:g.22823054C>G	Single base substitution	missense_variant IGLV2-8 S78C	2/412,0.49%	2/10188	MODERATE
2eadedca-9e75-5f2b-9f78-1514a16da307	chr12:g.122266360C>T	Single base substitution	missense_variant VPS33A E17K	2/412,0.49%	2/10188	MODERATE
2ebc64c6-01e1-5169-969f-76c351e277cd	chr17:g.40291660G>C	Single base substitution	missense_variant CDC6 D218H	2/412,0.49%	2/10188	MODERATE
2ec1f245-ad3b-56ed-bb6e-b00389e944b7	chr7:g.33505616C>T	Single base substitution	synonymous_variant BBS9 L757L	2/412,0.49%	2/10188	LOW
2f240b2d-95f2-5bd8-af9d-04c5e3ecb137	chr19:g.726158C>T	Single base substitution	missense_variant PALM T9M	2/412,0.49%	2/10188	MODERATE
2f4dabf9-bae3-525f-83ad-a01d4aac1bd3	chr19:g.41410771C>G	Single base substitution	synonymous_variant BCKDHA V81V	2/412,0.49%	2/10188	LOW
2fb5d520-7ffb-55c5-86bc-d4aeef410213	chr19:g.15683739C>T	Single base substitution	synonymous_variant CYP4F12 F298F	2/412,0.49%	4/10188	LOW
2fce2f7a-4da3-5cef-ab50-de0c632cb98c	chr19:g.30549485C>T	Single base substitution	missense_variant ZNF536 S1289F	2/412,0.49%	2/10188	MODERATE
2fceedb4-83ba-5630-9607-2b00068e07fe	chr1:g.212387021G>C	Single base substitution	missense_variant TMEM206 I71M	2/412,0.49%	2/10188	MODERATE
2fe29384-0614-5a63-9318-390db8f97a27	chr15:g.51480078G>A	Single base substitution	missense_variant DMXL2 S2209L	2/412,0.49%	3/10188	MODERATE
2feda264-189d-5cc9-82c3-b976faea249a	chr11:g.10305853G>A	Single base substitution	intron_variant ADM None	2/412,0.49%	2/10188	MODIFIER
302d008c-dc0c-5453-b620-e29711ca83ec	chr4:g.5460195C>A	Single base substitution	missense_variant STK32B F292L	2/412,0.49%	2/10188	MODERATE
303454bf-4408-583d-874f-45aa20c4bbef	chr19:g.55000770G>C	Single base substitution	missense_variant NLRP2 D1021H	2/412,0.49%	2/10188	MODERATE
303bd333-75f7-5c86-839f-a25599afdb36	chr4:g.152328233G>A	Single base substitution	missense_variant FBXW7 R465C	2/412,0.49%	40/10188	MODERATE
3059c812-cd6a-54ad-8968-db973e575b9e	chr2:g.213049826T>C	Single base substitution	missense_variant IKZF2 N154S	2/412,0.49%	2/10188	MODERATE
305b151f-0c97-55aa-ad07-bd60acd7c338	chr12:g.49022308C>G	Single base substitution	missense_variant KMT2D D5462H	2/412,0.49%	2/10188	MODERATE
3062bcc2-0461-5c34-8374-8e3f4c5bdbac	chr12:g.53213648G>A	Single base substitution	missense_variant RARG S289F	2/412,0.49%	2/10188	MODERATE
30a1f2c8-3d12-5543-995a-77bf5e6f1e83	chr17:g.29562630C>G	Single base substitution	missense_variant ABHD15 Q446H	2/412,0.49%	2/10188	MODERATE
30a53813-779e-5486-bf48-b056d0b7e63c	chr15:g.48738936G>A	Single base substitution	synonymous_variant CEP152 L1482L	2/412,0.49%	2/10188	LOW
30a68641-1bbc-5931-b05a-fffce459526c	chr2:g.75673446C>G	Single base substitution	missense_variant GCFC2 K629N	2/412,0.49%	2/10188	MODERATE
30b5ce6e-4e07-513b-8b85-1a9294394a8d	chr14:g.37591368delG	Small deletion	frameshift_variant FOXA1 *473Sfs*11	2/412,0.49%	2/10188	HIGH
30d620fb-9e9d-5d4d-b17f-d97c5ff84da4	chr17:g.31521163C>T	Single base substitution	splice_region_variant RAB11FIP4 None	2/412,0.49%	2/10188	LOW
30f37925-07b7-5fa1-962a-bfb0b74d1687	chr7:g.23256996G>A	Single base substitution	missense_variant GPNMB D158N	2/412,0.49%	2/10188	MODERATE
3109940f-9575-5f14-88e6-12ca8ccdd5e1	chr7:g.44708080C>T	Single base substitution	3_prime_UTR_variant OGDH None	2/412,0.49%	2/10188	MODIFIER
3127da6d-3e4b-56a3-86d1-4d26674ef7a5	chr6:g.55874821G>C	Single base substitution	synonymous_variant BMP5 L15L	2/412,0.49%	3/10188	LOW
31320901-264d-5bed-bccf-a4c1d4064a5a	chr19:g.47694506C>G	Single base substitution	missense_variant GLTSCR1 S892C	2/412,0.49%	2/10188	MODERATE
31fa4bf1-bb4b-54d8-88dd-efa70e97c0cc	chr19:g.54217321C>T	Single base substitution	missense_variant LILRB3 E584K	2/412,0.49%	2/10188	MODERATE
321bc86e-421d-549d-8dbf-c1ddfde5d8f0	chr7:g.77910406C>G	Single base substitution	stop_gained PHTF2 S258*	2/412,0.49%	2/10188	HIGH
33554959-8a12-5b20-bfc0-02aa5716725a	chr19:g.54596458C>T	Single base substitution	missense_variant LILRA1 H410Y	2/412,0.49%	2/10188	MODERATE
34077506-6a00-52e6-9c2f-4f46870e3b10	chr13:g.24709424C>T	Single base substitution	missense_variant ATP12A R852C	2/412,0.49%	3/10188	MODERATE
341b7155-5590-5ee4-82b3-b37fd0c32bf1	chr7:g.149832847G>A	Single base substitution	missense_variant SSPO R5120H	2/412,0.49%	3/10188	MODERATE
3444d3a5-3290-5fc8-8bdb-e52182b40849	chr10:g.24607533C>T	Single base substitution	missense_variant ARHGAP21 E884K	2/412,0.49%	2/10188	MODERATE
34785349-5cb0-5f4f-9acc-d8e2a267521f	chr2:g.27577374G>A	Single base substitution	missense_variant C2orf16 E268K	2/412,0.49%	3/10188	MODERATE
34cf1413-a2e2-5a1c-b786-dbb3dce21c3b	chr17:g.7673568C>T	Single base substitution	synonymous_variant TP53 K320K	2/412,0.49%	2/10188	LOW
34fa76bd-ddd5-506c-abd6-82fa86c772ba	chr12:g.49054922G>A	Single base substitution	stop_gained KMT2D Q52*	2/412,0.49%	2/10188	HIGH
35388877-1891-563b-bbfc-7945277b08da	chr4:g.37902307C>T	Single base substitution	missense_variant TBC1D1 S71F	2/412,0.49%	2/10188	MODERATE
3551da88-5639-5bb1-a13e-b255d889dcbf	chr2:g.151679924G>C	Single base substitution	missense_variant NEB I1047M	2/412,0.49%	2/10188	MODERATE
3554c9e7-5bba-50b1-a47b-e88174edfed3	chr4:g.68567977G>C	Single base substitution	missense_variant UGT2B17 L170V	2/412,0.49%	2/10188	MODERATE
355bb0c5-19b5-5b88-8157-aa0e94040c57	chr6:g.57090235C>T	Single base substitution	5_prime_UTR_variant ZNF451 None	2/412,0.49%	3/10188	MODIFIER
358b7fe5-7233-5df1-b8d1-f520f5282e44	chr21:g.43687682G>T	Single base substitution	synonymous_variant RRP1B L436L	2/412,0.49%	2/10188	LOW
35981d06-128c-5220-866d-f59e256595a8	chr7:g.27174275G>A	Single base substitution	missense_variant HOXA10 S11L	2/412,0.49%	2/10188	MODERATE
359ec2cf-7677-575e-b69c-cc00376368f2	chr1:g.113838029C>T	Single base substitution	synonymous_variant PTPN22 Q457Q	2/412,0.49%	2/10188	LOW
35dac9f5-7b0f-50e4-8c26-dbfc6eabc7d0	chr15:g.33635750G>A	Single base substitution	synonymous_variant RYR3 A1104A	2/412,0.49%	3/10188	LOW
35e0ca45-5523-562d-aa6e-161152fce7c7	chr17:g.74849904G>A	Single base substitution	synonymous_variant GRIN2C I507I	2/412,0.49%	2/10188	LOW
369478af-85ae-53e4-8ffe-e1c9f5afa67a	chr2:g.177234232C>G	Single base substitution	missense_variant NFE2L2 D29H	2/412,0.49%	16/10188	MODERATE
36a07e5e-4ff1-5422-ab37-ba7716741bb3	chr8:g.144213078C>T	Single base substitution	intron_variant MROH1 None	2/412,0.49%	3/10188	MODIFIER
36adf50a-a3f0-5092-833a-63b3497ccf35	chr17:g.7673809C>G	Single base substitution	missense_variant TP53 E271Q	2/412,0.49%	2/10188	MODERATE
36d5de5a-8e38-5e60-9dec-67d4ae3919a5	chr18:g.57684162C>T	Single base substitution	missense_variant ATP8B1 D502N	2/412,0.49%	2/10188	MODERATE
36e2b69b-1e1f-5846-8972-f7ec5c1ef0f0	chr1:g.226883818G>A	Single base substitution	synonymous_variant PSEN2 A85A	2/412,0.49%	2/10188	LOW
36ebedfd-0dd9-53cc-ba53-2edfa51cf8bf	chr18:g.49489523C>G	Single base substitution	upstream_gene_variant C18orf32 None	2/412,0.49%	2/10188	MODIFIER
3726cf4e-a536-52ce-b39c-6c0e8ea9355e	chr16:g.28924407C>T	Single base substitution	synonymous_variant RABEP2 L90L	2/412,0.49%	2/10188	LOW
372a5db5-6843-5db4-8fad-ef34e5a2543b	chr20:g.13785258G>T	Single base substitution	stop_gained NDUFAF5 E64*	2/412,0.49%	2/10188	HIGH
37c7ed17-2080-590f-8047-602a3c8cd14f	chr1:g.52064936G>C	Single base substitution	missense_variant BTF3L4 E56Q	2/412,0.49%	3/10188	MODERATE
37c9f655-64a7-5af0-a838-c792751a93f4	chr6:g.26123676C>T	Single base substitution	missense_variant HIST1H2BC E77K	2/412,0.49%	5/10188	MODERATE
37f9680e-9424-5b46-802e-54ca154b0b8c	chr20:g.62857460C>G	Single base substitution	missense_variant TCFL5 Q391H	2/412,0.49%	3/10188	MODERATE
38622676-5da5-5c8a-a330-04e28691155a	chr1:g.19780722G>A	Single base substitution	stop_gained TMCO4 Q13*	2/412,0.49%	3/10188	HIGH
38f1412b-1c1c-55f9-9288-28601127dfd1	chr6:g.155256455C>T	Single base substitution	intron_variant TIAM2 None	2/412,0.49%	2/10188	MODIFIER
38fe734a-6ac0-5363-a3a1-591c8c52bcb9	chr6:g.26188721G>A	Single base substitution	downstream_gene_variant HIST1H2BE None	2/412,0.49%	2/10188	MODIFIER
39066ba0-667c-5565-bb28-7e58457ce6ac	chr2:g.32415868C>G	Single base substitution	synonymous_variant BIRC6 L859L	2/412,0.49%	2/10188	LOW
392d9865-b802-53cd-ab24-ac9e7d6b2bb1	chr2:g.63055862C>T	Single base substitution	missense_variant OTX1 S204L	2/412,0.49%	2/10188	MODERATE
39471b2c-ce33-53bd-baac-e03027313f5d	chr3:g.9917356G>A	Single base substitution	missense_variant IL17RC R14Q	2/412,0.49%	2/10188	MODERATE
39bdbb70-5588-5c35-baed-263485c5dfd7	chr7:g.134127380G>C	Single base substitution	missense_variant LRGUK E5Q	2/412,0.49%	2/10188	MODERATE
3a93724d-aead-542c-815e-b371fcd2389e	chr16:g.5027280C>G	Single base substitution	missense_variant NAGPA R425T	2/412,0.49%	2/10188	MODERATE
3acca5e3-43b0-5983-af1c-dc49fefd83a2	chr1:g.235583778C>T	Single base substitution	missense_variant GNG4 E21K	2/412,0.49%	2/10188	MODERATE
3ad1575f-ab65-5e94-a5ec-61a30a14264e	chr19:g.17497309G>A	Single base substitution	missense_variant SLC27A1 E351K	2/412,0.49%	2/10188	MODERATE
3b940569-6329-5079-8c32-25b6a3decfd2	chr17:g.41489695G>C	Single base substitution	missense_variant KRT36 S57C	2/412,0.49%	2/10188	MODERATE
3be3dfda-3f88-5cd0-bf0c-e3d3a5d6b696	chrX:g.124083530C>T	Single base substitution	stop_gained STAG2 R1012*	2/412,0.49%	2/10188	HIGH
3c26df1f-7548-514a-a7d9-eec359a30581	chr4:g.2930986G>A	Single base substitution	intron_variant MFSD10 None	2/412,0.49%	2/10188	MODIFIER
3cfe58e2-40b6-570d-94ba-151c5eeef498	chr3:g.42638604C>T	Single base substitution	missense_variant NKTR S967L	2/412,0.49%	4/10188	MODERATE
3d434989-ff15-55da-943a-ccdfee94583a	chr19:g.48900888G>A	Single base substitution	missense_variant NUCB1 R31Q	2/412,0.49%	2/10188	MODERATE
3d467abd-29a6-5d96-b1ca-27636ae7b611	chr17:g.66964989C>T	Single base substitution	synonymous_variant CACNG4 I26I	2/412,0.49%	2/10188	LOW
3d5c9622-554d-5b14-af19-c590cd1f1141	chr1:g.26760967C>T	Single base substitution	stop_gained ARID1A Q678*	2/412,0.49%	3/10188	HIGH
3dd05e3b-b3d6-56ed-8490-140063fa62c6	chr21:g.44369230G>A	Single base substitution	missense_variant TRPM2 E220K	2/412,0.49%	2/10188	MODERATE
3dd6f8a9-b19d-5402-880c-f8eec35a953f	chr11:g.45224631C>T	Single base substitution	missense_variant PRDM11 S420L	2/412,0.49%	2/10188	MODERATE
3e400cd0-b7be-5046-a374-92f7d4ea66e2	chr6:g.25776906C>T	Single base substitution	synonymous_variant SLC17A4 I405I	2/412,0.49%	2/10188	LOW
3f0cf681-4e5f-537a-99b1-87a2a283fae5	chr15:g.77178938G>C	Single base substitution	missense_variant PEAK1 Q997E	2/412,0.49%	3/10188	MODERATE
3f11143c-676a-5ffc-99ee-2b85c4e0fe1e	chr8:g.94641436C>T	Single base substitution	synonymous_variant ESRP1 L40L	2/412,0.49%	2/10188	LOW
3f1ebc85-408d-5cc3-811d-06b58fcf6278	chr6:g.15468656C>T	Single base substitution	missense_variant JARID2 S203L	2/412,0.49%	2/10188	MODERATE
3f21648c-6b8f-58e2-86c9-fb1e6956f0ae	chr2:g.55617333C>T	Single base substitution	5_prime_UTR_variant SMEK2 None	2/412,0.49%	2/10188	MODIFIER
3f437268-4bcc-557e-ae4e-7ce8595bcf67	chr16:g.12078892C>T	Single base substitution	missense_variant SNX29 S460L	2/412,0.49%	2/10188	MODERATE
3f4cf5ea-c878-5975-9930-95e5dbd7ce52	chr17:g.39187509G>C	Single base substitution	missense_variant CACNB1 F128L	2/412,0.49%	2/10188	MODERATE
403252c8-2be8-5c53-bc52-946d0b563cf6	chr5:g.141331589C>G	Single base substitution	stop_gained PCDHGA1 S302*	2/412,0.49%	2/10188	HIGH
4033c908-1808-5cfd-9c3e-11c431000f8e	chr4:g.4321137G>A	Single base substitution	missense_variant ZBTB49 D707N	2/412,0.49%	2/10188	MODERATE
40a149d0-a0cd-59a1-ba36-b24ebea1673f	chr19:g.43204053C>G	Single base substitution	missense_variant PSG4 R88T	2/412,0.49%	2/10188	MODERATE
40bbf8db-2fb3-5f1d-a9fe-098472284435	chr17:g.1575649G>C	Single base substitution	synonymous_variant SLC43A2 L555L	2/412,0.49%	2/10188	LOW
40c6d00b-cdb8-578b-97c7-d28a4259550d	chr2:g.178580298G>A	Single base substitution	intron_variant TTN None	2/412,0.49%	2/10188	MODIFIER
40dfbd1a-01c8-5ae5-8dce-efb40d34e5a1	chr2:g.177234082C>T	Single base substitution	missense_variant NFE2L2 E79K	2/412,0.49%	8/10188	MODERATE
40f13e68-74fd-531d-a710-ba6fd5de9a51	chr3:g.36993604C>T	Single base substitution	synonymous_variant MLH1 I19I	2/412,0.49%	2/10188	LOW
41172685-5d9b-5907-a0ec-8c9ee5683ba2	chr7:g.99650142G>C	Single base substitution	synonymous_variant CYP3A5 L448L	2/412,0.49%	2/10188	LOW
41774d46-9888-5018-a016-8f552a24042d	chr6:g.54124602C>G	Single base substitution	missense_variant MLIP Q117E	2/412,0.49%	2/10188	MODERATE
41f07c83-6392-51f3-9f38-007c868393c4	chr3:g.37993922G>A	Single base substitution	missense_variant VILL E29K	2/412,0.49%	2/10188	MODERATE
420eff1e-a646-5db2-b506-806b0494e552	chr4:g.786671C>T	Single base substitution	missense_variant CPLX1 E79K	2/412,0.49%	5/10188	MODERATE
42619326-9470-51d6-b44b-305108209478	chr1:g.36296730_36296731insA	Small insertion	frameshift_variant THRAP3 T757Nfs*6	2/412,0.49%	7/10188	HIGH
427adb28-5c41-5165-af48-b092547d8bbc	chr2:g.239139726C>T	Single base substitution	synonymous_variant HDAC4 A312A	2/412,0.49%	2/10188	LOW
42be53cf-bd16-508e-8db1-52d3e80a7743	chr8:g.18684032G>C	Single base substitution	intron_variant PSD3 None	2/412,0.49%	2/10188	MODIFIER
42edc86e-ec00-597f-af5e-ae361330131b	chr4:g.70249142C>T	Single base substitution	missense_variant CSN3 R78C	2/412,0.49%	2/10188	MODERATE
431512e9-0d6b-5e68-a285-3e513145c700	chr13:g.38688415C>T	Single base substitution	synonymous_variant FREM2 F357F	2/412,0.49%	2/10188	LOW
435eda23-d878-5b80-82df-e80a6043df71	chr3:g.132352800G>A	Single base substitution	synonymous_variant ACPP L315L	2/412,0.49%	3/10188	LOW
4384b4b4-24a6-595a-8b21-3ae5192d13d7	chr14:g.106185083G>A	Single base substitution	stop_gained IGHV1-18 R57*	2/412,0.49%	5/10188	HIGH
44001981-eeef-5915-8d5e-b7d28bd52fac	chr16:g.67293560C>T	Single base substitution	synonymous_variant KCTD19 Q734Q	2/412,0.49%	2/10188	LOW
441b8d2e-f9ad-5873-9cc2-e94b53071bef	chr5:g.140801410C>A	Single base substitution	missense_variant PCDHA3 H71Q	2/412,0.49%	2/10188	MODERATE
44376f35-92ec-5b2d-a9fe-b1b7a69e2b00	chr21:g.14964851C>T	Single base substitution	synonymous_variant NRIP1 T1114T	2/412,0.49%	4/10188	LOW
44afbcc4-fdcc-5c39-b04f-345b35e748c7	chr6:g.26234799G>A	Single base substitution	synonymous_variant HIST1H1D I45I	2/412,0.49%	3/10188	LOW
44bccaa4-1d4b-5a82-9a21-b222d46d755f	chr17:g.41364972C>T	Single base substitution	missense_variant KRT33B E302K	2/412,0.49%	2/10188	MODERATE
45325bea-5e60-5d8a-bacc-246a49d45629	chr16:g.29485611C>G	Single base substitution	missense_variant RP11-231C14.4 V289L	2/412,0.49%	34/10188	MODERATE
45585a85-bb25-5010-b00c-b79a0ee2f506	chr2:g.179954307G>A	Single base substitution	synonymous_variant CWC22 F529F	2/412,0.49%	2/10188	LOW
45687264-2aba-577e-8a0e-2fca2ec5a581	chr2:g.27669288G>A	Single base substitution	missense_variant SLC4A1AP E416K	2/412,0.49%	2/10188	MODERATE
459176dc-95aa-5070-939f-4059afd0b332	chr3:g.50299295C>T	Single base substitution	5_prime_UTR_variant HYAL3 None	2/412,0.49%	3/10188	MODIFIER
45b517b1-14b4-56a8-b251-6c70cfb3ec12	chr11:g.15075154G>A	Single base substitution	missense_variant CALCB M60I	2/412,0.49%	2/10188	MODERATE
46019e1f-b09d-5111-a67e-383c3468a861	chr16:g.67830518G>C	Single base substitution	missense_variant CENPT S245C	2/412,0.49%	2/10188	MODERATE
4606e41a-525b-5170-8f01-ce4dde154a5a	chr16:g.67865197G>C	Single base substitution	missense_variant NUTF2 D23H	2/412,0.49%	2/10188	MODERATE
4679162c-a5c0-50fd-be34-8a98b241a3f9	chr3:g.194438861C>G	Single base substitution	missense_variant ATP13A3 E608Q	2/412,0.49%	2/10188	MODERATE
46808ca8-50aa-58f7-b62f-75536e3860f3	chr2:g.182935359C>G	Single base substitution	missense_variant NCKAP1 L904F	2/412,0.49%	3/10188	MODERATE
46e25bd2-f3a4-5d98-9b32-d2c55f168d09	chr1:g.171323166G>C	Single base substitution	missense_variant FMO4 D99H	2/412,0.49%	2/10188	MODERATE
46eaa6b6-5f0c-51f4-b55d-79a9064ae14c	chr1:g.26766318C>T	Single base substitution	stop_gained ARID1A Q944*	2/412,0.49%	4/10188	HIGH
473510d7-15e7-5a6a-8ba5-83250033e19a	chr13:g.26682899G>A	Single base substitution	missense_variant WASF3 E426K	2/412,0.49%	2/10188	MODERATE
474528e4-82a9-5957-8ccb-185db2cd1266	chr5:g.177209969G>A	Single base substitution	missense_variant NSD1 E524K	2/412,0.49%	2/10188	MODERATE
476315e9-b2e7-57c8-973c-30ce860ba491	chr3:g.47827417C>T	Single base substitution	synonymous_variant DHX30 L65L	2/412,0.49%	3/10188	LOW
47d7c2e9-acb5-5f09-9f3b-d6306effe5ac	chr11:g.2404862C>A	Single base substitution	3_prime_UTR_variant TRPM5 None	2/412,0.49%	2/10188	MODIFIER
483776d0-f3ed-5cce-87a7-efcd295bc792	chr2:g.236166385C>T	Single base substitution	synonymous_variant GBX2 P192P	2/412,0.49%	4/10188	LOW
4858879d-a92e-531f-b77d-02202636bdd8	chr11:g.1196473C>T	Single base substitution	splice_region_variant MUC5AC L5241L	2/412,0.49%	2/10188	LOW
488710be-4447-5c65-a9bf-8845b99663a1	chr19:g.49740144C>T	Single base substitution	missense_variant TSKS E513K	2/412,0.49%	2/10188	MODERATE
48c82617-462f-5f5a-b0ac-17995455851f	chr3:g.160432361G>C	Single base substitution	missense_variant SMC4 D1126H	2/412,0.49%	2/10188	MODERATE
48e87b23-28c1-51ba-b471-e61928479241	chr17:g.11608182G>A	Single base substitution	missense_variant DNAH9 M157I	2/412,0.49%	4/10188	MODERATE
4901c0b6-54c5-5a88-ae91-39ea48ea1f4c	chr9:g.128068566G>A	Single base substitution	missense_variant SLC25A25 E83K	2/412,0.49%	2/10188	MODERATE
49532508-15fd-539d-944c-d74d13576a03	chr14:g.91234616G>A	Single base substitution	synonymous_variant GPR68 I145I	2/412,0.49%	2/10188	LOW
49a2cf77-4703-55b7-8c19-e7bb7c2f60c9	chr6:g.26055784C>T	Single base substitution	downstream_gene_variant HIST1H1C None	2/412,0.49%	4/10188	MODIFIER
49aaf8af-86b3-51da-b5f8-a45f64570a49	chr6:g.111373467C>G	Single base substitution	missense_variant REV3L E1630Q	2/412,0.49%	2/10188	MODERATE
49bb4421-9019-5c32-8b44-3b6d363f214f	chr11:g.108304693C>T	Single base substitution	stop_gained ATM Q1839*	2/412,0.49%	2/10188	HIGH
49c9fe34-bfc1-5676-b930-61e65cdacaba	chr19:g.10320748G>C	Single base substitution	intron_variant RAVER1 None	2/412,0.49%	2/10188	MODIFIER
49cd6bd5-4e65-5ae7-ba2b-36d2dbe4d64e	chr3:g.179234297A>T	Single base substitution	missense_variant PIK3CA H1047L	2/412,0.49%	37/10188	MODERATE
49e8fec6-91cb-5b1c-9df0-6b13e88f2b3b	chr1:g.83907632G>A	Single base substitution	missense_variant TTLL7 R606W	2/412,0.49%	2/10188	MODERATE
49f65bc4-e156-535e-a069-3c958e559918	chr17:g.64800609G>A	Single base substitution	non_coding_transcript_exon_variant PLEKHM1P None	2/412,0.49%	2/10188	MODIFIER
4a0f1772-8edb-51c2-868e-cff8c4512173	chr19:g.7619998C>T	Single base substitution	missense_variant XAB2 E782K	2/412,0.49%	2/10188	MODERATE
4a4f1f35-9915-5b3c-89f2-a53dbfaaadc2	chr7:g.134934045G>C	Single base substitution	missense_variant CALD1 D426H	2/412,0.49%	2/10188	MODERATE
4aa05b79-daea-5257-bccc-4942cde64177	chrX:g.55487854C>G	Single base substitution	synonymous_variant USP51 L362L	2/412,0.49%	2/10188	LOW
4aca1e9f-f311-5c71-8164-6d855f037501	chr9:g.133360045C>T	Single base substitution	missense_variant SURF2 R145C	2/412,0.49%	6/10188	MODERATE
4ae12469-b059-5d95-80d1-6d3d2e739f6f	chr8:g.12725747C>T	Single base substitution	missense_variant LONRF1 E715K	2/412,0.49%	2/10188	MODERATE
4af7fd97-ce54-5383-8380-f01f56a0699e	chr5:g.78360616C>G	Single base substitution	5_prime_UTR_variant SCAMP1 None	2/412,0.49%	2/10188	MODIFIER
4b280a66-97e4-576f-9675-35d5c6dc640e	chr14:g.38209710C>A	Single base substitution	synonymous_variant SSTR1 L107L	2/412,0.49%	2/10188	LOW
4b9456f9-46fb-5cae-a6bb-aef48a85d873	chr11:g.67501996C>T	Single base substitution	missense_variant PITPNM1 R169Q	2/412,0.49%	3/10188	MODERATE
4b947a3e-ff9f-5e17-8d81-f5ed22dca3e0	chr22:g.36497996C>T	Single base substitution	synonymous_variant FOXRED2 L459L	2/412,0.49%	2/10188	LOW
4be22166-e8b3-581c-93a6-ccabd5967839	chr15:g.93014813C>T	Single base substitution	stop_gained CHD2 Q1604*	2/412,0.49%	2/10188	HIGH
4c06c62f-a376-537e-a686-14f1bcce5fb2	chr6:g.73518511G>C	Single base substitution	missense_variant EEF1A1 S291C	2/412,0.49%	2/10188	MODERATE
4c2b1abc-2ce0-5dab-aa62-270a17bf0298	chr8:g.143605780C>G	Single base substitution	missense_variant PYCRL E249Q	2/412,0.49%	3/10188	MODERATE
4c7eb4c3-18e0-55ad-acbd-e6387b190d39	chr19:g.48304014G>A	Single base substitution	synonymous_variant CCDC114 L227L	2/412,0.49%	2/10188	LOW
4c89bb55-442e-512c-ad74-1be97662a44b	chr1:g.235448363C>G	Single base substitution	missense_variant TBCE Q472E	2/412,0.49%	2/10188	MODERATE
4c95ff97-1dde-5c2a-93c9-9caa05f799cc	chr8:g.144932415C>T	Single base substitution	synonymous_variant ZNF16 R124R	2/412,0.49%	2/10188	LOW
4c9feb22-b35d-5328-b2f1-d3e1d44bb4d0	chr19:g.11237458C>T	Single base substitution	missense_variant DOCK6 D691N	2/412,0.49%	2/10188	MODERATE
4d7240ef-5fe9-5b14-8a91-d565697223e5	chr22:g.50084783C>T	Single base substitution	synonymous_variant MLC1 S40S	2/412,0.49%	7/10188	LOW
4da8b776-d247-59ff-abcd-2123fed7c6c6	chr1:g.113837977G>C	Single base substitution	missense_variant PTPN22 Q475E	2/412,0.49%	2/10188	MODERATE
4db59311-0f73-5fe8-bc06-64e7f909f1ec	chr4:g.67673733G>A	Single base substitution	synonymous_variant UBA6 I170I	2/412,0.49%	2/10188	LOW
4db89839-1390-566f-b9c5-a04deab50779	chr1:g.3890986C>T	Single base substitution	synonymous_variant C1orf174 V67V	2/412,0.49%	2/10188	LOW
4dd1b792-1502-57be-a288-03967011e143	chr1:g.233252554G>C	Single base substitution	intron_variant PCNXL2 None	2/412,0.49%	2/10188	MODIFIER
4e2bfd61-3682-512a-bd9b-9d4b68d678e9	chr8:g.79611179G>A	Single base substitution	5_prime_UTR_variant STMN2 None	2/412,0.49%	3/10188	MODIFIER
4e5862f7-f64a-5a56-a140-29849ac1c7b4	chr22:g.41169571A>G	Single base substitution	missense_variant EP300 Y1414C	2/412,0.49%	3/10188	MODERATE
4e5b0722-29d5-5c3d-96d7-8dcd5852c9b0	chr9:g.122826694G>A	Single base substitution	stop_gained PDCL R32*	2/412,0.49%	5/10188	HIGH
4ecb8159-bcbf-5900-a1d5-7c94252f6a5a	chr2:g.119882146C>G	Single base substitution	missense_variant PTPN4 Q155E	2/412,0.49%	2/10188	MODERATE
4ee552d7-0852-5b4f-a811-51a32d8e0f54	chr2:g.24037709G>C	Single base substitution	missense_variant C2orf44 Q596E	2/412,0.49%	4/10188	MODERATE
4f0f248d-1004-5c75-b4be-5d49f3a9e82e	chr19:g.6591021C>T	Single base substitution	5_prime_UTR_variant CD70 None	2/412,0.49%	2/10188	MODIFIER
4f1c6a67-ab75-5bd8-9715-ab01549298d8	chr3:g.179221146G>A	Single base substitution	missense_variant PIK3CA E726K	2/412,0.49%	30/10188	MODERATE
4f5fce07-5675-5d54-8cbb-3d5442f5b828	chr15:g.58065586G>A	Single base substitution	missense_variant ALDH1A2 S22L	2/412,0.49%	2/10188	MODERATE
4f634500-b464-50fd-b8fe-b6005c3074dc	chr5:g.13840918G>C	Single base substitution	missense_variant DNAH5 I1899M	2/412,0.49%	2/10188	MODERATE
4f6b7a49-337f-5564-a250-89758f483f2b	chr1:g.77521934C>T	Single base substitution	synonymous_variant AK5 F473F	2/412,0.49%	9/10188	LOW
4fb37566-16d1-5697-9732-27c359828bc7	chr12:g.25245350C>A	Single base substitution	missense_variant KRAS G12V	2/412,0.49%	176/10188	MODERATE
4fbde352-cf47-536c-b23f-da1208d6d2fb	chr2:g.73291420G>A	Single base substitution	3_prime_UTR_variant EGR4 None	2/412,0.49%	2/10188	MODIFIER
507546e8-c45f-5260-a4ae-4f823919fadb	chr11:g.66422517C>T	Single base substitution	missense_variant NPAS4 R132C	2/412,0.49%	2/10188	MODERATE
50787772-8c44-5f8a-8b8b-391134fd51e3	chr17:g.49619073C>G	Single base substitution	missense_variant SPOP D130H	2/412,0.49%	2/10188	MODERATE
50a91a1f-84e8-5e6b-9f15-9836e36aa066	chr1:g.200908843G>A	Single base substitution	missense_variant C1orf106 E315K	2/412,0.49%	3/10188	MODERATE
5102a59c-fa30-54ac-b241-93496cb6259b	chr6:g.32085903C>T	Single base substitution	missense_variant TNXB E999K	2/412,0.49%	2/10188	MODERATE
511290c0-45b2-501f-a337-9f9f1ed9b21d	chr7:g.100553406C>T	Single base substitution	missense_variant AGFG2 P164L	2/412,0.49%	2/10188	MODERATE
5116b609-f844-5fc5-9d32-80202eea1174	chr19:g.21116905G>C	Single base substitution	missense_variant ZNF714 E81Q	2/412,0.49%	2/10188	MODERATE
512d78a3-26b1-5eb5-9dd4-349b67421bc9	chrX:g.103713984C>G	Single base substitution	missense_variant TMEM31 L165V	2/412,0.49%	2/10188	MODERATE
516883ff-15a2-58c9-9589-231520da8697	chr1:g.6124081C>A	Single base substitution	synonymous_variant CHD5 G1522G	2/412,0.49%	2/10188	LOW
5182ddc8-94e3-5ecb-acca-6b4845314bb2	chr9:g.95508193C>T	Single base substitution	missense_variant PTCH1 D57N	2/412,0.49%	2/10188	MODERATE
51a03b7a-347e-5274-85bb-83aa89957e88	chr12:g.132791290C>T	Single base substitution	missense_variant GOLGA3 E825K	2/412,0.49%	2/10188	MODERATE
51a07b60-f90f-5815-b0b8-8146f17cc1b7	chr14:g.20460202G>T	Single base substitution	synonymous_variant TMEM55B R144R	2/412,0.49%	2/10188	LOW
521c9a2b-8bec-5dff-b51e-f96f12ddfbb8	chr7:g.100319970G>A	Single base substitution	missense_variant SPDYE3 D544N	2/412,0.49%	3/10188	MODERATE
5222a200-6527-5f26-813f-f21db1042646	chr1:g.148966952C>T	Single base substitution	synonymous_variant PDE4DIP L527L	2/412,0.49%	2/10188	LOW
522a1571-fc82-50ef-9d87-a7022a771dbb	chr18:g.13092446C>T	Single base substitution	missense_variant CEP192 S2058L	2/412,0.49%	3/10188	MODERATE
523453ed-04f8-5622-888e-1ea19987c8c7	chr1:g.161000718G>A	Single base substitution	missense_variant F11R R101W	2/412,0.49%	2/10188	MODERATE
529485f6-10ef-540c-bfee-ef77b2e82573	chr4:g.110621205C>T	Single base substitution	missense_variant PITX2 E117K	2/412,0.49%	2/10188	MODERATE
52bdf8d8-f411-503d-a0ff-38a5fc91eea3	chr2:g.25756066C>G	Single base substitution	missense_variant ASXL2 E330Q	2/412,0.49%	2/10188	MODERATE
52dc7663-3fa0-5ea6-8422-b0bfe5d65064	chr19:g.54575887C>A	Single base substitution	missense_variant LILRA2 Q345K	2/412,0.49%	2/10188	MODERATE
5355ee7e-7399-523d-82eb-ae94baad0dc7	chr1:g.42456643C>T	Single base substitution	synonymous_variant PPCS F26F	2/412,0.49%	2/10188	LOW
540e668c-2d88-54f1-aee7-69e26d249eb5	chr2:g.88575431G>A	Single base substitution	synonymous_variant EIF2AK3 L684L	2/412,0.49%	2/10188	LOW
546980c9-140e-5dd6-a2da-bb7cbae41541	chr15:g.88906653G>A	Single base substitution	synonymous_variant MFGE8 F171F	2/412,0.49%	2/10188	LOW
54809e7a-9043-59c4-940f-862e0f5976b2	chr7:g.71787790C>G	Single base substitution	synonymous_variant CALN1 R215R	2/412,0.49%	2/10188	LOW
55064ec1-fbcf-59cf-bdc1-e3253ad13eb2	chr15:g.74023312G>A	Single base substitution	missense_variant PML E363K	2/412,0.49%	2/10188	MODERATE
564f24d6-1f47-5dfc-b07d-f51cbc108f5f	chr20:g.37301336G>A	Single base substitution	missense_variant MANBAL G25R	2/412,0.49%	2/10188	MODERATE
565e7776-8cbf-5ecb-89aa-cf82f2bb6d60	chr3:g.81536953C>T	Single base substitution	missense_variant GBE1 M587I	2/412,0.49%	2/10188	MODERATE
569160df-e0b7-57f3-88f2-19866e2016ca	chr17:g.78419543C>G	Single base substitution	splice_region_variant PGS1 None	2/412,0.49%	2/10188	LOW
56b017ea-bf6b-5a32-925d-c19134dd76aa	chr6:g.144187308C>G	Single base substitution	synonymous_variant STX11 L227L	2/412,0.49%	2/10188	LOW
56b3f1c0-ac19-53ac-8564-fb7c470565e0	chr6:g.73519390C>T	Single base substitution	missense_variant EEF1A1 D91N	2/412,0.49%	4/10188	MODERATE
571cbe6f-09d3-5ffe-b325-d3af0cfa0b5e	chr19:g.55881519G>C	Single base substitution	missense_variant NLRP4 E973Q	2/412,0.49%	2/10188	MODERATE
57326163-0b2d-5b5f-9752-590ee8302530	chr2:g.96143910G>A	Single base substitution	synonymous_variant DUSP2 F286F	2/412,0.49%	3/10188	LOW
57326916-249f-56a7-911c-e08d9c2e6bf8	chr17:g.41811174G>A	Single base substitution	synonymous_variant P3H4 V191V	2/412,0.49%	2/10188	LOW
57c4293d-f353-533b-8006-ade3a32bb7b3	chr16:g.3781262G>A	Single base substitution	stop_gained CREBBP Q540*	2/412,0.49%	2/10188	HIGH
57c6e843-7a04-5fb8-b55c-3a5f5a2036b9	chr7:g.5065104G>C	Single base substitution	missense_variant RBAK E550Q	2/412,0.49%	2/10188	MODERATE
57c7e971-a0ec-5552-82dc-eed41b6373ed	chr10:g.73376218C>G	Single base substitution	splice_acceptor_variant ANXA7 X449_splice	2/412,0.49%	2/10188	HIGH
5865ec4c-e5e3-5cbd-89e7-da468a155092	chr1:g.32226316G>C	Single base substitution	missense_variant EIF3I Q132H	2/412,0.49%	2/10188	MODERATE
586a8d49-e88c-5e0e-9dd5-1d890bdf4899	chr8:g.116850644delC	Small deletion	frameshift_variant RAD21 E532Kfs*80	2/412,0.49%	2/10188	HIGH
58809b83-bc01-5b42-8d31-68c913c574da	chr6:g.10695067G>A	Single base substitution	missense_variant PAK1IP1 E28K	2/412,0.49%	2/10188	MODERATE
58a50fdc-d572-5d2d-9f0a-440d4a88fab4	chr15:g.69429189G>A	Single base substitution	missense_variant KIF23 E350K	2/412,0.49%	2/10188	MODERATE
59184177-ca55-5c44-b77d-da8295469c54	chr18:g.24082992G>A	Single base substitution	missense_variant TTC39C E299K	2/412,0.49%	2/10188	MODERATE
59365bec-39ce-54a4-a501-3828621ffd15	chr14:g.94174434C>G	Single base substitution	5_prime_UTR_variant PPP4R4 None	2/412,0.49%	2/10188	MODIFIER
594130c6-c8d2-5e39-b11a-1158aca3ca45	chr15:g.74802041C>G	Single base substitution	synonymous_variant CSK L376L	2/412,0.49%	2/10188	LOW
596a19d8-9882-565c-8f8e-1508c1632dec	chr1:g.48298627A>T	Single base substitution	3_prime_UTR_variant SPATA6 None	2/412,0.49%	4/10188	MODIFIER
598959bc-d053-5547-8205-d7fca19f62d8	chr4:g.40438368C>T	Single base substitution	missense_variant RBM47 E176K	2/412,0.49%	2/10188	MODERATE
5998cadb-bd69-5b8f-a745-955ff9d4db5a	chr3:g.52802801G>A	Single base substitution	synonymous_variant ITIH3 E568E	2/412,0.49%	2/10188	LOW
59dea68e-5d23-5272-be56-010637994506	chr14:g.95662634C>T	Single base substitution	upstream_gene_variant TCL6 None	2/412,0.49%	2/10188	MODIFIER
59e37c80-3e6b-5287-bbad-b484b8c640a7	chr15:g.22943220C>T	Single base substitution	synonymous_variant CYFIP1 L174L	2/412,0.49%	2/10188	LOW
5a329961-5993-5eed-96f2-85684358321a	chr3:g.12406008C>T	Single base substitution	missense_variant PPARG S249L	2/412,0.49%	2/10188	MODERATE
5a3dc96d-38da-51d1-88bb-18276c200a8f	chr2:g.108294264G>C	Single base substitution	missense_variant SULT1C2 E63Q	2/412,0.49%	2/10188	MODERATE
5ab7ce3b-7f2a-536b-a762-65ec31b5dfa6	chr3:g.185918370G>A	Single base substitution	missense_variant TRA2B S284L	2/412,0.49%	2/10188	MODERATE
5aea9690-9f61-55d9-bdfa-35500dacedec	chr6:g.52836352G>A	Single base substitution	synonymous_variant GSTA5 F52F	2/412,0.49%	2/10188	LOW
5af85105-d026-525b-9d2d-c46b2e4457f5	chr2:g.32250639C>G	Single base substitution	missense_variant NLRC4 E409Q	2/412,0.49%	2/10188	MODERATE
5b54947c-ffb0-5175-bc77-751c1c6e1a2e	chr19:g.12681620G>A	Single base substitution	synonymous_variant DHPS F49F	2/412,0.49%	3/10188	LOW
5bbbcc1c-1c93-5ce6-ad1c-303f46c0a5ba	chr2:g.74530018G>A	Single base substitution	synonymous_variant HTRA2 P4P	2/412,0.49%	4/10188	LOW
5bca0a5f-2b1d-5fd6-9fc0-9de514d4a004	chr19:g.55320581G>T	Single base substitution	synonymous_variant TMEM150B L35L	2/412,0.49%	2/10188	LOW
5c356796-88ca-5306-b80d-dd9829ec14bb	chr15:g.41775308G>A	Single base substitution	synonymous_variant MAPKBP1 R11R	2/412,0.49%	2/10188	LOW
5c917673-37b7-5d0e-9884-899ba4e9ab63	chr12:g.25245328C>G	Single base substitution	missense_variant KRAS L19F	2/412,0.49%	5/10188	MODERATE
5cb27ba2-4b36-55e4-8b21-cbd08b24c4b1	chr7:g.157169058G>A	Single base substitution	missense_variant UBE3C R44Q	2/412,0.49%	2/10188	MODERATE
5cf6a672-a24f-50fe-9500-af0c87f35e27	chr2:g.9904925C>T	Single base substitution	missense_variant TAF1B R292C	2/412,0.49%	3/10188	MODERATE
5da2d292-5156-5f1e-baa4-23aa371bc6a4	chr2:g.54629332C>T	Single base substitution	missense_variant SPTBN1 S733L	2/412,0.49%	2/10188	MODERATE
5dd03603-6647-5432-a146-a1948fcedf78	chr5:g.141640089G>A	Single base substitution	missense_variant RELL2 E225K	2/412,0.49%	3/10188	MODERATE
5e062cdc-1223-5667-9ff3-392744b7c8e5	chr1:g.43553930C>T	Single base substitution	missense_variant PTPRF S123L	2/412,0.49%	2/10188	MODERATE
5e4bc090-4091-5ae0-a374-c31a0900eb49	chr12:g.120557650G>A	Single base substitution	stop_gained RNF10 W312*	2/412,0.49%	2/10188	HIGH
5e9febef-8914-50cd-9cdf-0ddd9e719995	chr19:g.5866602C>G	Single base substitution	stop_lost FUT5 *375Sext*20	2/412,0.49%	2/10188	HIGH
5eddaba2-34ca-5b9e-9f25-c3d2a72cb0df	chr1:g.26889689G>A	Single base substitution	synonymous_variant GPN2 L136L	2/412,0.49%	2/10188	LOW
5f319a32-2694-563f-be7c-d717b53cc3cb	chr4:g.54738646C>T	Single base substitution	3_prime_UTR_variant KIT None	2/412,0.49%	3/10188	MODIFIER
5f4f4ec4-3628-5f69-801c-e778cc130a9e	chr3:g.19515386G>A	Single base substitution	missense_variant KCNH8 E834K	2/412,0.49%	2/10188	MODERATE
5f6bcdb0-e705-5226-ac3b-fc47626f8d53	chr16:g.3289455C>T	Single base substitution	stop_gained ZNF263 Q317*	2/412,0.49%	2/10188	HIGH
5fa96060-b395-53fc-9ed6-5c6d3ff111cc	chr2:g.160013327G>A	Single base substitution	stop_gained PLA2R1 R534*	2/412,0.49%	4/10188	HIGH
60a0458d-6b97-501f-849f-a25138c98b72	chr18:g.14479339C>T	Single base substitution	non_coding_transcript_exon_variant CXADRP3 None	2/412,0.49%	2/10188	MODIFIER
60b0af96-1504-5412-b075-c12953362b0d	chr1:g.1331478G>A	Single base substitution	missense_variant TAS1R3 E45K	2/412,0.49%	2/10188	MODERATE
60b94063-81a0-5ad2-b5a9-ae827edcb0d0	chr2:g.190436760C>G	Single base substitution	stop_gained MFSD6 S244*	2/412,0.49%	2/10188	HIGH
60ccaf5c-71e1-5e5e-8de8-3b98f7c2ce6e	chr6:g.36684421_36684422insG	Small insertion	frameshift_variant CDKN1A E108Gfs*21	2/412,0.49%	2/10188	HIGH
60ecac94-dcf3-53d1-9c85-ec5909c46ab3	chr8:g.100288026G>A	Single base substitution	missense_variant RNF19A S50F	2/412,0.49%	2/10188	MODERATE
6100a115-c1ed-53ca-9341-a79d6ea6ace4	chr1:g.42545555G>A	Single base substitution	missense_variant CCDC30 R134Q	2/412,0.49%	2/10188	MODERATE
612d19ff-5b3d-5ffc-9dbf-a44ca3aed8f6	chr8:g.74849370C>G	Single base substitution	3_prime_UTR_variant PI15 None	2/412,0.49%	2/10188	MODIFIER
6149acdf-d3e6-5feb-b25f-eb950ccb646d	chr8:g.52940813C>T	Single base substitution	synonymous_variant NPBWR1 L302L	2/412,0.49%	2/10188	LOW
618b42da-40d2-5a1f-ab04-8f46b75dd466	chr22:g.31873293C>G	Single base substitution	missense_variant DEPDC5 S1175C	2/412,0.49%	2/10188	MODERATE
618d9d23-cdee-500f-ab70-7b449c6e2853	chr19:g.5244375C>T	Single base substitution	missense_variant PTPRS E366K	2/412,0.49%	2/10188	MODERATE
618e1239-da12-5762-a0cb-4618d4e742a9	chr8:g.78601898G>C	Single base substitution	3_prime_UTR_variant PKIA None	2/412,0.49%	2/10188	MODIFIER
6206912c-f310-5af1-9faa-9fb7a79b98ed	chr12:g.114394848C>T	Single base substitution	missense_variant TBX5 V186M	2/412,0.49%	2/10188	MODERATE
6222269f-33af-5bb9-83fb-11fe9762a912	chr9:g.137012807C>T	Single base substitution	synonymous_variant ABCA2 Q1662Q	2/412,0.49%	2/10188	LOW
62339187-99c0-52ca-b557-3380abf4ff3e	chr19:g.44386934G>A	Single base substitution	synonymous_variant ZNF285 F437F	2/412,0.49%	2/10188	LOW
623730be-16b1-50ed-9a8a-0837e3e8db65	chr8:g.21909532G>A	Single base substitution	stop_gained DOK2 R340*	2/412,0.49%	2/10188	HIGH
625d31a8-b4e2-59c9-a5c0-a7f896a89e7f	chr17:g.48529835G>A	Single base substitution	synonymous_variant HOXB1 L206L	2/412,0.49%	2/10188	LOW
62797216-e1a1-5d93-a6c4-8d87abdd6ba1	chr11:g.27057283G>C	Single base substitution	missense_variant BBOX1 R101T	2/412,0.49%	2/10188	MODERATE
62b2a782-91a5-5b45-b6dd-636ed8fa4374	chr19:g.50716298C>G	Single base substitution	missense_variant SHANK1 E146Q	2/412,0.49%	2/10188	MODERATE
631ffef5-1e5b-578c-a8e0-e91e11adb656	chr8:g.143943899C>T	Single base substitution	intron_variant PLEC None	2/412,0.49%	2/10188	MODIFIER
633ba25a-76d4-5a42-8f08-cbc6998210cb	chr10:g.104353812C>T	Single base substitution	5_prime_UTR_variant CFAP58 None	2/412,0.49%	2/10188	MODIFIER
63633aac-4fa1-5b05-8d6f-07420b24e3fd	chr2:g.98380181G>A	Single base substitution	synonymous_variant CNGA3 S74S	2/412,0.49%	3/10188	LOW
636af2a1-6e42-56e3-ad8c-3061e3e35451	chr10:g.86960039G>A	Single base substitution	missense_variant SNCG E68K	2/412,0.49%	2/10188	MODERATE
63887c50-2a87-5153-97d4-2e84e22a0c8c	chr11:g.56137561G>C	Single base substitution	missense_variant OR8J3 S53C	2/412,0.49%	2/10188	MODERATE
63b8fd07-d74d-5987-8d54-43498a514afd	chrX:g.123888627G>A	Single base substitution	missense_variant XIAP D296N	2/412,0.49%	2/10188	MODERATE
63c06de6-31f6-5e18-8378-54abc454e300	chr1:g.40462639C>G	Single base substitution	missense_variant ZFP69B Q219E	2/412,0.49%	2/10188	MODERATE
63c150ed-1842-573a-9b01-0c537d4cc1fc	chr1:g.10304607C>T	Single base substitution	intron_variant KIF1B None	2/412,0.49%	3/10188	MODIFIER
64356b86-724e-5bff-acd7-0f8b7685128a	chr17:g.58703294T>C	Single base substitution	missense_variant RAD51C Y224H	2/412,0.49%	2/10188	MODERATE
64c03594-f323-5595-8837-fa4890838407	chr8:g.55773529G>A	Single base substitution	5_prime_UTR_variant TGS1 None	2/412,0.49%	2/10188	MODIFIER
64c31d9f-888a-5437-b21d-cc321ff77880	chr3:g.138946516C>G	Single base substitution	missense_variant FOXL2 E69D	2/412,0.49%	2/10188	MODERATE
64f0d8fd-29f2-5ffc-827b-7fcf9826b178	chr11:g.617419C>T	Single base substitution	missense_variant CDHR5 E824K	2/412,0.49%	2/10188	MODERATE
6527bf63-dca7-5cdb-8c4a-54d689cf5894	chr12:g.54281460G>A	Single base substitution	synonymous_variant HNRNPA1 L30L	2/412,0.49%	2/10188	LOW
655b577a-3a40-5610-98a1-4f5df6d530e5	chr3:g.8548904G>A	Single base substitution	splice_donor_variant LMCD1 X241_splice	2/412,0.49%	2/10188	HIGH
657b2bb0-9db3-5589-a15e-4019033a429d	chr2:g.144389816C>G	Single base substitution	missense_variant ZEB2 E1094Q	2/412,0.49%	2/10188	MODERATE
65bcd619-2abb-5451-8f54-ae5d5fc1e212	chr11:g.6260077G>A	Single base substitution	missense_variant CCKBR R50Q	2/412,0.49%	4/10188	MODERATE
65d10862-a655-5afd-ba24-a56cbdeb0a8b	chr14:g.93183705C>T	Single base substitution	missense_variant MOAP1 E180K	2/412,0.49%	2/10188	MODERATE
6606ab78-387d-53f1-8503-3faa8e3bee03	chr5:g.71650121G>C	Single base substitution	missense_variant MCCC2 E476Q	2/412,0.49%	2/10188	MODERATE
661024c5-578f-5c62-8d61-a98948ea109f	chr19:g.40209194C>T	Single base substitution	synonymous_variant MAP3K10 I509I	2/412,0.49%	2/10188	LOW
6653fcc4-b848-50db-8791-fae4b96ccc13	chr7:g.149103734G>A	Single base substitution	synonymous_variant ZNF425 L713L	2/412,0.49%	2/10188	LOW
665d1487-98d0-5d4a-9059-16f93ad8f25c	chr6:g.152369094G>A	Single base substitution	stop_gained SYNE1 Q3229*	2/412,0.49%	2/10188	HIGH
667cc7b0-5f68-579b-9adb-a0eda6fb0560	chr1:g.10321706C>T	Single base substitution	splice_region_variant KIF1B None	2/412,0.49%	2/10188	LOW
668fc955-93a4-538f-8d18-a71f7d488daa	chr17:g.42201653G>C	Single base substitution	3_prime_UTR_variant STAT5B None	2/412,0.49%	2/10188	MODIFIER
66a025de-f8d5-5e89-995c-6bc46c2cb808	chrX:g.141905480C>T	Single base substitution	missense_variant MAGEC1 P26S	2/412,0.49%	2/10188	MODERATE
66c18ce6-0593-5095-80f3-f8feca356150	chr6:g.43282832C>T	Single base substitution	missense_variant TTBK1 R698W	2/412,0.49%	2/10188	MODERATE
66d0d9c1-62ae-5f99-8ac2-3e2372fb1a37	chr9:g.124881834C>G	Single base substitution	missense_variant GOLGA1 E696Q	2/412,0.49%	2/10188	MODERATE
673b541f-ba66-5819-9a28-2ce14c815cdd	chr12:g.93849967C>T	Single base substitution	splice_region_variant CRADD None	2/412,0.49%	2/10188	LOW
677814af-96fa-5a93-b1e7-74de7083be68	chr8:g.92005144C>T	Single base substitution	missense_variant RUNX1T1 E238K	2/412,0.49%	7/10188	MODERATE
67a9aefd-3597-51b1-8e49-749f3249f6a8	chr17:g.19003780G>C	Single base substitution	missense_variant FAM83G Q88E	2/412,0.49%	3/10188	MODERATE
67bd67cb-d4f8-56d8-99ab-b10739a09312	chr19:g.12381041G>C	Single base substitution	3_prime_UTR_variant CTD-3105H18.14 None	2/412,0.49%	2/10188	MODIFIER
67ebeb7c-20de-595f-8136-1b0d218e09cc	chr19:g.23146223G>C	Single base substitution	missense_variant ZNF730 E393D	2/412,0.49%	2/10188	MODERATE
67f8412b-f3dc-52fa-bc07-c6dca9501fea	chr7:g.152311933G>A	Single base substitution	stop_gained KMT2C Q202*	2/412,0.49%	2/10188	HIGH
67f904d5-61b1-58ea-a9a8-240b21305d3a	chr19:g.16490398C>T	Single base substitution	synonymous_variant CALR3 L122L	2/412,0.49%	2/10188	LOW
6886221e-0df0-5e1a-9deb-ec95d3e64da6	chr20:g.31950343C>T	Single base substitution	synonymous_variant PDRG1 L44L	2/412,0.49%	2/10188	LOW
688bc8a7-2529-525c-b28f-dc7cd7416369	chr1:g.24442180C>T	Single base substitution	synonymous_variant NIPAL3 F96F	2/412,0.49%	4/10188	LOW
68ca1061-924f-5bfe-81cf-65666a458f53	chr15:g.41332419G>A	Single base substitution	missense_variant OIP5 S48L	2/412,0.49%	2/10188	MODERATE
690bfdba-6547-5263-bedc-d6b6c72e65fe	chr16:g.20737866G>C	Single base substitution	stop_gained THUMPD1 S166*	2/412,0.49%	2/10188	HIGH
69107d8f-eaf2-50dc-91ef-35567d96727b	chr1:g.16720064C>T	Single base substitution	non_coding_transcript_exon_variant ESPNP None	2/412,0.49%	3/10188	MODIFIER
6921f08c-09a9-539c-bd6e-190119db923a	chr14:g.21499110C>T	Single base substitution	missense_variant METTL3 E516K	2/412,0.49%	2/10188	MODERATE
69aad2dd-4a1d-5d2a-b89f-9f885c29f9dc	chr13:g.72727613G>A	Single base substitution	5_prime_UTR_variant MZT1 None	2/412,0.49%	2/10188	MODIFIER
69e6ef99-22de-5fad-b624-b7c38c5798f0	chr22:g.48576480G>A	Single base substitution	intron_variant FAM19A5 None	2/412,0.49%	3/10188	MODIFIER
6a690c50-0dc5-537d-99a0-2673be9f4136	chr2:g.120349106C>T	Single base substitution	synonymous_variant INHBB L152L	2/412,0.49%	3/10188	LOW
6a6ae125-a0f9-5645-a1f1-ce7d5b03c6e1	chr17:g.7572807G>C	Single base substitution	downstream_gene_variant SENP3 None	2/412,0.49%	2/10188	MODIFIER
6ac241e0-d365-5a0a-9c40-d3a09be2f889	chr17:g.27640633C>T	Single base substitution	missense_variant LGALS9 R65W	2/412,0.49%	4/10188	MODERATE
6ac40406-bcd1-55d8-9fbb-94fc04acbdc8	chr20:g.47636317C>G	Single base substitution	stop_gained NCOA3 S644*	2/412,0.49%	2/10188	HIGH
6aebcc26-eef3-5a80-88cf-2d24dee29812	chr1:g.114713908T>C	Single base substitution	missense_variant NRAS Q61R	2/412,0.49%	112/10188	MODERATE
6b82d502-01e7-59d9-aa81-42b62eea148d	chr6:g.83854103G>A	Single base substitution	missense_variant RIPPLY2 D61N	2/412,0.49%	2/10188	MODERATE
6c15ea34-b644-54ec-8fc5-2691e5964b93	chr4:g.39480575G>A	Single base substitution	downstream_gene_variant LIAS None	2/412,0.49%	3/10188	MODIFIER
6c2003ad-416c-5010-ae90-c5b41d4f36a6	chr8:g.8318175C>T	Single base substitution	synonymous_variant SGK223 L1400L	2/412,0.49%	2/10188	LOW
6c4a7672-4f80-51aa-885f-1919195971ba	chr9:g.87922110G>C	Single base substitution	non_coding_transcript_exon_variant SPATA31C1 None	2/412,0.49%	2/10188	MODIFIER
6c917c99-62b7-57c1-89df-11ab1896c9fa	chr14:g.100149106G>A	Single base substitution	synonymous_variant DEGS2 F229F	2/412,0.49%	10/10188	LOW
6cd7fdef-38b2-5dde-95b8-9603405cdbfc	chr19:g.11949389C>T	Single base substitution	synonymous_variant ZNF700 F455F	2/412,0.49%	2/10188	LOW
6d3b1a25-4ef9-5266-8fa2-d2541da19dfa	chr11:g.86337511C>T	Single base substitution	missense_variant C11orf73 S134L	2/412,0.49%	2/10188	MODERATE
6d72167d-9b79-53d9-ad21-76b09c3ebce0	chr7:g.56015133C>T	Single base substitution	missense_variant PSPH E154K	2/412,0.49%	2/10188	MODERATE
6d9a396a-d374-535c-8edf-25b7ed39add5	chr2:g.69781552C>T	Single base substitution	5_prime_UTR_variant ANXA4 None	2/412,0.49%	2/10188	MODIFIER
6e6eee1a-c2eb-5d61-b294-c17c397bfc30	chr11:g.43359023C>T	Single base substitution	synonymous_variant TTC17 L23L	2/412,0.49%	2/10188	LOW
6e86a046-b01a-57a5-81fd-b8a2435c6c0b	chr1:g.15660086C>A	Single base substitution	missense_variant RSC1A1 S73Y	2/412,0.49%	2/10188	MODERATE
6e8c5c8e-52fd-5203-9943-cabf67844502	chr8:g.86508605G>C	Single base substitution	missense_variant RMDN1 R6G	2/412,0.49%	2/10188	MODERATE
6e908563-e923-579a-b9ea-011f2fccc9bd	chr15:g.90638788G>A	Single base substitution	missense_variant CRTC3 M507I	2/412,0.49%	2/10188	MODERATE
6e9bc741-0879-5d94-9862-92f346ca2146	chr1:g.230943820C>G	Single base substitution	missense_variant TTC13 E220Q	2/412,0.49%	3/10188	MODERATE
6ea4bac2-cb66-534f-9bf7-662b1d9b2f6c	chr3:g.179210291G>A	Single base substitution	missense_variant PIK3CA E453K	2/412,0.49%	19/10188	MODERATE
6ee9ff46-9ab5-5a2b-98f2-eb10aa45048e	chr4:g.26957614C>T	Single base substitution	splice_region_variant STIM2 F95F	2/412,0.49%	2/10188	LOW
6f84895b-6d3f-5922-b2f4-5dfeca9d6fad	chr1:g.152109243C>G	Single base substitution	missense_variant TCHH R1325T	2/412,0.49%	2/10188	MODERATE
6f905cfa-700d-57aa-a052-bc9b221fe677	chr1:g.26731320C>T	Single base substitution	stop_gained ARID1A Q507*	2/412,0.49%	2/10188	HIGH
6fb68797-60d3-57da-9d60-9f840e5b04b9	chr3:g.120750768C>G	Single base substitution	missense_variant GTF2E1 I72M	2/412,0.49%	3/10188	MODERATE
6fb9271c-f3b0-5cc3-bfe3-2a1654fe802b	chr10:g.61428951C>A	Single base substitution	stop_gained TMEM26 E194*	2/412,0.49%	2/10188	HIGH
702c2948-0ad4-5a4b-9423-d248a630640e	chr15:g.21439756G>T	Single base substitution	missense_variant POTEB3 H86N	2/412,0.49%	2/10188	MODERATE
70897ff0-a64c-5b9b-ac08-af28fd3f3460	chr11:g.64266525C>T	Single base substitution	synonymous_variant PLCB3 I1129I	2/412,0.49%	2/10188	LOW
709961e7-349c-5142-847a-8aa6115a1c51	chr16:g.29841638G>A	Single base substitution	missense_variant MVP E412K	2/412,0.49%	5/10188	MODERATE
70c0a778-6bf1-5d5d-ac4c-7ec0b51b942e	chr16:g.70512280C>T	Single base substitution	missense_variant COG4 E233K	2/412,0.49%	2/10188	MODERATE
70eee621-16a9-55a6-a570-65ac629fb978	chr11:g.62527838C>G	Single base substitution	missense_variant AHNAK L2193F	2/412,0.49%	2/10188	MODERATE
7133dc1e-e9fa-5aa6-849a-1daa22099e58	chr14:g.104943881G>A	Single base substitution	missense_variant AHNAK2 S3857F	2/412,0.49%	2/10188	MODERATE
715afb13-6dec-5f03-8a72-23df84f4c1c7	chr6:g.27814652C>T	Single base substitution	missense_variant HIST1H2AJ R30Q	2/412,0.49%	2/10188	MODERATE
71da2ee0-235e-5bc7-ac25-a0fbc6faafad	chr2:g.45389325G>A	Single base substitution	synonymous_variant SRBD1 L991L	2/412,0.49%	2/10188	LOW
71f01a86-e45f-5ac7-bd18-ede48535060c	chr7:g.99532267G>C	Single base substitution	3_prime_UTR_variant ZKSCAN5 None	2/412,0.49%	2/10188	MODIFIER
725f2123-a8f9-5a4e-aa80-ae00734f21f4	chr14:g.103727848G>C	Single base substitution	missense_variant ZFYVE21 E98Q	2/412,0.49%	2/10188	MODERATE
72ac8e4f-451f-57c6-9eb7-c2d15844900d	chr17:g.39530956G>A	Single base substitution	synonymous_variant CDK12 V1371V	2/412,0.49%	2/10188	LOW
72b26789-a036-52d8-8ee5-07b510b268c0	chr9:g.132907371C>T	Single base substitution	splice_acceptor_variant TSC1 X422_splice	2/412,0.49%	2/10188	HIGH
72c0cac1-ec57-5972-bd83-0fda34c27273	chr7:g.33505616C>G	Single base substitution	missense_variant BBS9 L757V	2/412,0.49%	2/10188	MODERATE
72dece8f-52f1-5b4c-bfed-4f00441e14d2	chr19:g.48873819G>A	Single base substitution	missense_variant PPP1R15A E196K	2/412,0.49%	2/10188	MODERATE
72f6e0be-0dc3-5ab5-b633-a6331af201e2	chr16:g.68352381C>T	Single base substitution	missense_variant PRMT7 S516L	2/412,0.49%	2/10188	MODERATE
73698506-b992-53ab-a9a6-0b84b28ae69c	chr22:g.36286738C>T	Single base substitution	missense_variant MYH9 E1681K	2/412,0.49%	3/10188	MODERATE
7397a148-240b-5eb5-a50c-dd3dd54d5768	chr11:g.35619207G>A	Single base substitution	missense_variant FJX1 E191K	2/412,0.49%	3/10188	MODERATE
73a6d3db-fc02-5222-9258-96e5f3a15c5c	chr15:g.89576109G>A	Single base substitution	missense_variant TICRR E175K	2/412,0.49%	2/10188	MODERATE
73dd57d4-2e10-504f-a391-34046f8b0198	chr12:g.49050901G>A	Single base substitution	stop_gained KMT2D Q928*	2/412,0.49%	2/10188	HIGH
748b4d3d-9086-54eb-8a10-e4c2bdf9be91	chr17:g.80086053G>A	Single base substitution	synonymous_variant CCDC40 L762L	2/412,0.49%	2/10188	LOW
75018fa8-fd6a-5408-a6a0-6ce449c81447	chr3:g.195726459G>A	Single base substitution	missense_variant MUC20 R619Q	2/412,0.49%	2/10188	MODERATE
7501a310-7537-5de3-9877-332faf4226b4	chr22:g.29231041G>C	Single base substitution	missense_variant EMID1 E163Q	2/412,0.49%	2/10188	MODERATE
7534f9a5-4f38-565a-b265-1c9cc134ce95	chr3:g.52211365C>T	Single base substitution	synonymous_variant ALAS1 F471F	2/412,0.49%	3/10188	LOW
757fb7e9-2168-5d15-9563-7908839206f6	chr1:g.202013277G>C	Single base substitution	missense_variant ELF3 E262Q	2/412,0.49%	3/10188	MODERATE
75972460-25ab-5b90-ba46-a66f251898f9	chr19:g.677931C>T	Single base substitution	synonymous_variant FSTL3 I81I	2/412,0.49%	2/10188	LOW
75fb71b6-6fbd-58de-89b5-792317bcf8aa	chr10:g.96318476T>C	Single base substitution	missense_variant DNTT C110R	2/412,0.49%	2/10188	MODERATE
75fcbfc0-3652-5f1e-b75d-2bbfc86890ea	chr6:g.26234691G>C	Single base substitution	missense_variant HIST1H1D I81M	2/412,0.49%	2/10188	MODERATE
764a1d6b-bb01-5941-8c42-cfb9589d67fe	chr11:g.64297000C>T	Single base substitution	splice_region_variant KCNK4 I104I	2/412,0.49%	2/10188	LOW
76500c59-e9fb-5d58-87e9-4bb90948ae2f	chr8:g.48918779C>G	Single base substitution	3_prime_UTR_variant SNAI2 None	2/412,0.49%	2/10188	MODIFIER
768bbbfa-3af7-511a-af98-216fd987d564	chr10:g.100233147C>T	Single base substitution	3_prime_UTR_variant CWF19L1 None	2/412,0.49%	2/10188	MODIFIER
768d6815-f151-5790-8757-b3befb216b2b	chr4:g.186619101G>A	Single base substitution	synonymous_variant FAT1 N2495N	2/412,0.49%	3/10188	LOW
76f3670c-1926-598b-b9f0-63b460fde4ef	chr7:g.1092640C>T	Single base substitution	synonymous_variant GPER1 L304L	2/412,0.49%	2/10188	LOW
771da5bd-66c5-579c-b825-3de702dcc839	chr20:g.35557512C>T	Single base substitution	3_prime_UTR_variant ERGIC3 None	2/412,0.49%	3/10188	MODIFIER
7771c729-05fa-5dd8-bae3-b5dcee0c5780	chr18:g.76984888C>T	Single base substitution	missense_variant MBP E253K	2/412,0.49%	3/10188	MODERATE
778aef65-328b-5f7c-af48-04dd6e866ef1	chr19:g.54818366G>A	Single base substitution	missense_variant KIR3DL1 R41Q	2/412,0.49%	2/10188	MODERATE
779ea46c-f1e6-5ed2-b554-7d633f0980d2	chr1:g.6148869G>A	Single base substitution	synonymous_variant CHD5 L456L	2/412,0.49%	2/10188	LOW
77b5cde4-9e28-58ae-b504-55b53593e610	chr14:g.101029633C>T	Single base substitution	non_coding_transcript_exon_variant MIR494 None	2/412,0.49%	3/10188	MODIFIER
782cc676-bbe4-5fd2-96d5-0fb38dd4b0c6	chr7:g.48643285C>T	Single base substitution	splice_region_variant ABCA13 None	2/412,0.49%	2/10188	LOW
782fd855-f41b-5e52-a722-1d7d435d6cb0	chr19:g.12884774C>T	Single base substitution	3_prime_UTR_variant KLF1 None	2/412,0.49%	3/10188	MODIFIER
784ba3a6-482e-5f0f-a1af-74ee88622e30	chr17:g.31227232C>T	Single base substitution	stop_gained NF1 Q756*	2/412,0.49%	3/10188	HIGH
786b6218-ce27-53a7-9368-67268d6e925c	chr12:g.26486211C>T	Single base substitution	missense_variant ITPR2 E1902K	2/412,0.49%	2/10188	MODERATE
793c6b27-2dd4-5f71-a352-ad3db83f7b9e	chr16:g.84085037G>C	Single base substitution	stop_gained MBTPS1 S411*	2/412,0.49%	2/10188	HIGH
793d6730-1b8c-5e19-9a64-fa401592d3b1	chrX:g.34131197C>T	Single base substitution	missense_variant FAM47A R361H	2/412,0.49%	4/10188	MODERATE
7958a023-97c1-5072-b338-4415e464ec65	chr1:g.180065217G>A	Single base substitution	missense_variant CEP350 E1838K	2/412,0.49%	4/10188	MODERATE
798fb6ba-5116-5cd5-9b1a-61acc4236c1f	chr5:g.141209429G>A	Single base substitution	synonymous_variant PCDHB12 P174P	2/412,0.49%	2/10188	LOW
7a369685-6a5b-56da-bb48-909f43d2abdb	chr6:g.149680211C>G	Single base substitution	missense_variant LATS1 E753Q	2/412,0.49%	2/10188	MODERATE
7a406fa6-74dc-5ff5-9e3a-b54781ec30db	chr1:g.150998162G>A	Single base substitution	missense_variant FAM63A H365Y	2/412,0.49%	2/10188	MODERATE
7a526a2d-ff95-501c-92a2-03c657dd1330	chr4:g.76309309C>G	Single base substitution	missense_variant FAM47E-STBD1 S129C	2/412,0.49%	2/10188	MODERATE
7a762474-3c87-5013-9135-9fb982535c1a	chr19:g.52706489G>A	Single base substitution	missense_variant ZNF611 S189L	2/412,0.49%	2/10188	MODERATE
7a7aaa7f-752c-5014-9869-261360d592c3	chr11:g.17412715C>T	Single base substitution	missense_variant ABCC8 R836Q	2/412,0.49%	3/10188	MODERATE
7aa1c2f9-84c2-5450-bec7-54a0fccec15b	chr12:g.95474141C>T	Single base substitution	5_prime_UTR_variant METAP2 None	2/412,0.49%	2/10188	MODIFIER
7ad5ba1c-737f-587a-b4f2-a329be79a737	chr6:g.27872024C>T	Single base substitution	missense_variant HIST1H3I E98K	2/412,0.49%	3/10188	MODERATE
7afddb6b-9f7d-5b46-8d50-a9559175eb65	chr1:g.36301017C>G	Single base substitution	stop_gained THRAP3 S812*	2/412,0.49%	2/10188	HIGH
7b365a18-91ca-55c5-9136-89f93c3932db	chr15:g.82345252T>A	Single base substitution	missense_variant GOLGA6L10 E203V	2/412,0.49%	14/10188	MODERATE
7b5e4676-f2d7-54a1-8550-12700a04ebe0	chr7:g.26197675C>T	Single base substitution	missense_variant HNRNPA2B1 E34K	2/412,0.49%	2/10188	MODERATE
7b6788a2-faee-550a-8cce-82045a6f4033	chr17:g.56594785G>A	Single base substitution	missense_variant NOG E188K	2/412,0.49%	2/10188	MODERATE
7bb7c158-8ec2-522e-8429-7b6ccd5ad878	chr17:g.7675195C>G	Single base substitution	missense_variant TP53 K139N	2/412,0.49%	2/10188	MODERATE
7bc58ba2-9f1b-5d97-9be5-14b62dc574e3	chr11:g.3005417C>T	Single base substitution	synonymous_variant CARS V639V	2/412,0.49%	2/10188	LOW
7c208def-0726-5d65-a532-2ed69edc843f	chr12:g.112978722G>A	Single base substitution	synonymous_variant OAS2 V38V	2/412,0.49%	2/10188	LOW
7c2bb057-dbe9-5553-8904-edda00e28f53	chr5:g.138319237C>T	Single base substitution	synonymous_variant CDC25C L199L	2/412,0.49%	2/10188	LOW
7c315f35-fe26-5d73-a8c1-91be0ad52999	chr19:g.52034767G>A	Single base substitution	synonymous_variant ZNF432 L304L	2/412,0.49%	3/10188	LOW
7cb4067a-6b4b-5760-8cc6-1183f24f85ab	chr19:g.1434779C>G	Single base substitution	stop_gained DAZAP1 S364*	2/412,0.49%	2/10188	HIGH
7cd94b61-1a90-590b-b13c-d028e63dc0e3	chr2:g.33588427G>A	Single base substitution	stop_gained FAM98A Q144*	2/412,0.49%	2/10188	HIGH
7cf07e92-a095-5a5b-9248-e28c7f8243c8	chr1:g.40463531C>T	Single base substitution	missense_variant ZFP69B S516L	2/412,0.49%	3/10188	MODERATE
7d05b8ee-eaaf-55d6-b108-26513797f45e	chr16:g.22280325G>A	Single base substitution	missense_variant EEF2K E673K	2/412,0.49%	4/10188	MODERATE
7d3600a2-c6d5-5ea7-8655-cbc0dfbd7392	chr19:g.43546087C>T	Single base substitution	synonymous_variant XRCC1 A482A	2/412,0.49%	2/10188	LOW
7d4217ce-0555-501d-b003-b560b1ef00b0	chr19:g.48961099C>G	Single base substitution	intron_variant BAX None	2/412,0.49%	2/10188	MODIFIER
7d7d7408-ea8c-5cd4-bb82-b467bda3342e	chr4:g.107720187G>A	Single base substitution	5_prime_UTR_variant PAPSS1 None	2/412,0.49%	3/10188	MODIFIER
7d8188b8-958a-5e74-8e8f-9571439c24ee	chr11:g.65506286G>C	Single base substitution	upstream_gene_variant MALAT1 None	2/412,0.49%	2/10188	MODIFIER
7dbd549f-c2b1-5aa4-80d8-2000dd53bd39	chr4:g.88823164C>T	Single base substitution	intron_variant FAM13A None	2/412,0.49%	2/10188	MODIFIER
7dc2cb9a-0151-5c32-9f43-2ae0360dc7b4	chr17:g.44015043C>G	Single base substitution	upstream_gene_variant TMEM101 None	2/412,0.49%	2/10188	MODIFIER
7e592adf-993e-5b55-836a-0ab16509d913	chr1:g.153958411C>T	Single base substitution	synonymous_variant CRTC2 Q29Q	2/412,0.49%	2/10188	LOW
7ed58865-c30f-5172-86b5-742b4e948d93	chr2:g.207930964G>A	Single base substitution	synonymous_variant PLEKHM3 F616F	2/412,0.49%	2/10188	LOW
7edeaba2-0df2-5d7e-a169-d36b730b15fc	chr5:g.38407102G>A	Single base substitution	missense_variant EGFLAM R368Q	2/412,0.49%	3/10188	MODERATE
7f9378a3-206d-5b08-8182-3af35f4245f2	chr13:g.27435141C>T	Single base substitution	synonymous_variant GTF3A L294L	2/412,0.49%	2/10188	LOW
7f99aba1-fd85-53f6-be98-8b0461eb4513	chr3:g.138946371C>T	Single base substitution	missense_variant FOXL2 E118K	2/412,0.49%	4/10188	MODERATE
7fb6c956-6f58-5624-9f40-6d764df82dfb	chr19:g.50794843C>G	Single base substitution	synonymous_variant ACPT L348L	2/412,0.49%	2/10188	LOW
8007439a-31ea-5111-a973-5063d9f3ab10	chr3:g.184389433G>A	Single base substitution	3_prime_UTR_variant CHRD None	2/412,0.49%	3/10188	MODIFIER
802779ea-83f5-5e61-bee9-f8a95b189a73	chr2:g.202035041G>A	Single base substitution	missense_variant FZD7 E132K	2/412,0.49%	3/10188	MODERATE
803c1dc8-9f91-591b-90ae-63e7aa67493d	chr19:g.42370201G>A	Single base substitution	missense_variant MEGF8 E2283K	2/412,0.49%	3/10188	MODERATE
8060a992-76b0-5194-bc12-4768f628b237	chr16:g.20963846G>A	Single base substitution	synonymous_variant DNAH3 I3346I	2/412,0.49%	2/10188	LOW
8061c074-6f94-59bb-9bdb-b5180d58b149	chr17:g.18161331G>A	Single base substitution	missense_variant MYO15A R3134Q	2/412,0.49%	4/10188	MODERATE
80a535d2-8e7b-50d0-91cc-7d1f6a66e499	chr12:g.120727071C>T	Single base substitution	missense_variant ACADS S31F	2/412,0.49%	2/10188	MODERATE
80d1b1b3-5f01-513d-bdfd-7836d1b6c8a6	chr17:g.8173446C>T	Single base substitution	downstream_gene_variant TMEM107 None	2/412,0.49%	2/10188	MODIFIER
811e8155-57ca-5f7f-b8a9-feb5a7c9f2e2	chr7:g.1476638G>C	Single base substitution	missense_variant INTS1 L1695V	2/412,0.49%	2/10188	MODERATE
813007bd-06b6-56b7-a902-6caec5661801	chr17:g.75978872G>C	Single base substitution	intron_variant ACOX1 None	2/412,0.49%	2/10188	MODIFIER
817fd488-2410-5c73-94b3-dc5d39eb7306	chr7:g.93105446C>T	Single base substitution	missense_variant SAMD9 E218K	2/412,0.49%	2/10188	MODERATE
818f4cfe-ac12-558a-898f-fcabde24f696	chr11:g.62525752C>G	Single base substitution	missense_variant AHNAK D2889H	2/412,0.49%	2/10188	MODERATE
81dc68f5-8021-5ab6-8859-2712e3449620	chr8:g.56168207C>T	Single base substitution	synonymous_variant PLAG1 G21G	2/412,0.49%	2/10188	LOW
81e58791-23ad-537a-bcc3-1fa09c202977	chr13:g.20034341G>A	Single base substitution	missense_variant ZMYM2 E686K	2/412,0.49%	2/10188	MODERATE
8235b93f-a566-50f1-88bf-18b50b4bd41f	chr1:g.1333352G>A	Single base substitution	missense_variant TAS1R3 E525K	2/412,0.49%	2/10188	MODERATE
825a74db-4f75-5876-a472-c6204f1d66e0	chr19:g.54939483G>A	Single base substitution	missense_variant NLRP7 R446C	2/412,0.49%	3/10188	MODERATE
828fd6bf-b5f0-5de7-8949-34250b0acbae	chr19:g.45353098C>G	Single base substitution	missense_variant ERCC2 E606Q	2/412,0.49%	2/10188	MODERATE
82a33291-9e83-5cef-ad3c-112471d1c2d1	chr11:g.75587166G>C	Single base substitution	missense_variant MAP6 L779V	2/412,0.49%	2/10188	MODERATE
82a67fb8-4c82-5bd0-9a77-6dabcf45b93e	chr8:g.23255333C>T	Single base substitution	synonymous_variant CHMP7 L186L	2/412,0.49%	3/10188	LOW
82d07c16-d109-57c8-94f4-5c8300688298	chr19:g.37611982G>C	Single base substitution	missense_variant ZNF540 Q234H	2/412,0.49%	2/10188	MODERATE
82ebbd86-87c9-5ea4-a287-f581cb58c673	chr12:g.14614931C>T	Single base substitution	missense_variant GUCY2C E995K	2/412,0.49%	2/10188	MODERATE
82f7f35e-855b-527e-9f09-05ef0f549651	chr4:g.6576637C>T	Single base substitution	synonymous_variant MAN2B2 R66R	2/412,0.49%	5/10188	LOW
82fa5eb1-8f6c-58f4-80c8-4a2863109b9f	chr1:g.148536242A>T	Single base substitution	missense_variant NBPF14 L2791M	2/412,0.49%	27/10188	MODERATE
83065849-01d9-5d4a-9b10-1799d39a2693	chr13:g.35045342C>T	Single base substitution	stop_gained NBEA Q222*	2/412,0.49%	2/10188	HIGH
832670dd-7215-51a9-bf00-5d96989c45e1	chr8:g.99854198G>A	Single base substitution	synonymous_variant VPS13B A3628A	2/412,0.49%	4/10188	LOW
832cd123-36d8-561e-80e7-7a9a140b1856	chr4:g.49050763C>T	Single base substitution	synonymous_variant CWH43 I645I	2/412,0.49%	3/10188	LOW
834f9151-ada3-55a5-90ff-379a922198df	chr10:g.122632863C>G	Single base substitution	missense_variant DMBT1 P1995A	2/412,0.49%	2/10188	MODERATE
835625f2-4fd7-59c6-97f8-7a97077a032a	chr17:g.7675064G>C	Single base substitution	stop_gained TP53 S183*	2/412,0.49%	7/10188	HIGH
8356e793-5815-5935-b9e0-c5072f1f4c4b	chr1:g.208039683C>T	Single base substitution	missense_variant PLXNA2 E1480K	2/412,0.49%	4/10188	MODERATE
83bf3791-c0a6-5ebd-a631-819fef5e8fde	chr17:g.62576706C>T	Single base substitution	splice_region_variant TLK2 None	2/412,0.49%	2/10188	LOW
83d2b6ea-c0ba-5e7b-abf6-34a47081ce53	chr7:g.116699253C>G	Single base substitution	missense_variant MET L57V	2/412,0.49%	2/10188	MODERATE
83f99c61-e4fd-5696-9bfb-d5d6aeffbc29	chr8:g.132002655G>A	Single base substitution	synonymous_variant EFR3A E753E	2/412,0.49%	2/10188	LOW
83fd941d-28fb-5a38-8b83-392f32fbb51c	chr22:g.27799129G>A	Single base substitution	missense_variant MN1 S472L	2/412,0.49%	2/10188	MODERATE
84500083-f5b4-575f-a5c2-b08287533b84	chr1:g.32224455G>C	Single base substitution	missense_variant EIF3I R77P	2/412,0.49%	2/10188	MODERATE
84528fb7-6835-5ffd-a9eb-f356f3938072	chr17:g.50357186G>A	Single base substitution	synonymous_variant XYLT2 L625L	2/412,0.49%	2/10188	LOW
8484acc5-f45b-5d4b-87d0-d5a5d843dbd7	chr15:g.101753689G>A	Single base substitution	non_coding_transcript_exon_variant DNM1P47 None	2/412,0.49%	6/10188	MODIFIER
84ccb3d3-0875-5b38-ab7e-69d48abf9dab	chrX:g.8466180G>C	Single base substitution	missense_variant VCX3B V180L	2/412,0.49%	10/10188	MODERATE
84cf1c56-64d8-598e-81c1-4af4724217cf	chr20:g.33623137G>A	Single base substitution	missense_variant CBFA2T2 R187Q	2/412,0.49%	2/10188	MODERATE
84f86875-19e1-5ff6-9bc3-e69fc49c109f	chr1:g.241787925G>T	Single base substitution	missense_variant WDR64 D918Y	2/412,0.49%	4/10188	MODERATE
85254375-51d0-5bb0-86df-6347c07ca8ba	chr12:g.10809589C>G	Single base substitution	missense_variant TAS2R9 E163Q	2/412,0.49%	2/10188	MODERATE
8548f61f-d267-59fc-94cb-ca2444145d6a	chr4:g.87185343C>T	Single base substitution	missense_variant KLHL8 E225K	2/412,0.49%	2/10188	MODERATE
855df73b-654f-5709-be12-8334b92f12be	chr12:g.55320801G>C	Single base substitution	missense_variant OR6C1 E68Q	2/412,0.49%	2/10188	MODERATE
856106a9-4ab7-53ea-b4a3-a8ad65ae3747	chr12:g.120438149C>T	Single base substitution	missense_variant COX6A1 S8L	2/412,0.49%	2/10188	MODERATE
86ad69de-19ad-5dd7-a410-38833336b806	chr13:g.106534968G>A	Single base substitution	5_prime_UTR_variant EFNB2 None	2/412,0.49%	2/10188	MODIFIER
86b41557-30b7-5049-bd5a-d9e9adc3e61c	chr11:g.534288C>T	Single base substitution	missense_variant HRAS G12D	2/412,0.49%	6/10188	MODERATE
8738acfa-6a08-5d21-95e8-8d229056ab89	chr3:g.113660892C>T	Single base substitution	missense_variant KIAA2018 E264K	2/412,0.49%	2/10188	MODERATE
873bd224-e6de-54a7-8dc5-79cacbe67f7b	chr4:g.145654073G>A	Single base substitution	missense_variant MMAA R300Q	2/412,0.49%	2/10188	MODERATE
87698c58-66f5-5fe0-96de-9e4a2e9093dc	chr5:g.141945786C>T	Single base substitution	synonymous_variant PCDH12 L1050L	2/412,0.49%	2/10188	LOW
876c3f78-7930-5dc4-894d-96c4c6089e12	chr17:g.81700780C>T	Single base substitution	missense_variant HGS S701L	2/412,0.49%	2/10188	MODERATE
878abda3-abc8-5068-86d7-e0f490bef685	chr4:g.83063105C>G	Single base substitution	missense_variant COPS4 L249V	2/412,0.49%	2/10188	MODERATE
87d201c4-149a-5c48-9e6a-82cb6fec3351	chr17:g.21415688G>A	Single base substitution	missense_variant KCNJ12 E116K	2/412,0.49%	2/10188	MODERATE
881cce30-7f90-5ed5-bf8f-495b2756c2a4	chr12:g.34022708G>A	Single base substitution	missense_variant ALG10 D37N	2/412,0.49%	2/10188	MODERATE
882611aa-85b9-580c-a292-bdc260f4d120	chr3:g.138655463C>T	Single base substitution	missense_variant PIK3CB E1047K	2/412,0.49%	2/10188	MODERATE
88287185-da1c-542e-b8bb-fbc0630e0f7e	chr1:g.215083402C>G	Single base substitution	missense_variant KCNK2 S6W	2/412,0.49%	2/10188	MODERATE
883651e1-afa1-5bb9-a610-f858669e5dc7	chr7:g.95318374G>A	Single base substitution	stop_gained PON1 R32*	2/412,0.49%	3/10188	HIGH
886c1ea3-dd53-5a2f-a92d-37979bd787b4	chr19:g.47480812C>G	Single base substitution	missense_variant KPTN E183Q	2/412,0.49%	2/10188	MODERATE
894b899d-2e04-5e0a-b38e-18b38dd39991	chr17:g.62265075G>C	Single base substitution	non_coding_transcript_exon_variant TBC1D3P2 None	2/412,0.49%	2/10188	MODIFIER
89a72b15-cee2-5843-94ae-4a30c2ea46b2	chr17:g.7673740C>A	Single base substitution	stop_gained TP53 E294*	2/412,0.49%	16/10188	HIGH
89a7bcb3-943f-534e-86fe-46e70c8cdad1	chr16:g.58587875G>A	Single base substitution	stop_gained CNOT1 Q72*	2/412,0.49%	2/10188	HIGH
89c3308b-e7bd-5f8e-b203-bd85da00a6db	chr14:g.104707930C>T	Single base substitution	missense_variant INF2 R555W	2/412,0.49%	2/10188	MODERATE
89e844e8-3d06-5cca-967e-0d71dd0e7477	chr7:g.44697409G>C	Single base substitution	missense_variant OGDH K697N	2/412,0.49%	2/10188	MODERATE
8a4865b2-844c-5f5b-abf5-5e3e4cc6c851	chr1:g.202012435delTGG	Small deletion	splice_donor_variant ELF3 X160_splice	2/412,0.49%	3/10188	HIGH
8a6033d6-fcfa-577d-a2a5-10bdbe0a63c9	chr15:g.85580410C>T	Single base substitution	missense_variant AKAP13 S781L	2/412,0.49%	2/10188	MODERATE
8a75b8e8-85ea-5b09-8653-06b89c89c5fd	chr2:g.11824784C>T	Single base substitution	missense_variant LPIN1 S889L	2/412,0.49%	2/10188	MODERATE
8a8708a1-da93-5b40-a261-f0a3aab6fd47	chr21:g.10578577C>T	Single base substitution	synonymous_variant TPTE I333I	2/412,0.49%	6/10188	LOW
8abb5364-d694-566f-b6a9-2ed8ef75b2b8	chr4:g.70764574C>G	Single base substitution	splice_region_variant RUFY3 L190L	2/412,0.49%	2/10188	LOW
8ad2dab1-0f6e-5935-8fdd-2fc032c8a474	chr17:g.8448564C>T	Single base substitution	missense_variant NDEL1 S135L	2/412,0.49%	2/10188	MODERATE
8b00e7cc-eb0c-5f29-8242-63a3e8bf6940	chr8:g.123775214C>T	Single base substitution	synonymous_variant FAM91A1 L75L	2/412,0.49%	2/10188	LOW
8b2fa45d-70aa-5a43-8603-f7b93b509bc7	chr8:g.52661596T>C	Single base substitution	missense_variant RB1CC1 I433V	2/412,0.49%	2/10188	MODERATE
8b5b22b6-568b-5b53-bd0c-df20f590b616	chr11:g.128772969C>T	Single base substitution	synonymous_variant FLI1 L191L	2/412,0.49%	2/10188	LOW
8b5e85de-52be-5b72-81c5-10e5f280ca6b	chr6:g.26225446G>A	Single base substitution	missense_variant HIST1H3E E98K	2/412,0.49%	3/10188	MODERATE
8b697c58-450d-5723-b182-b78f7a130e47	chr5:g.146590145C>T	Single base substitution	synonymous_variant PPP2R2B S378S	2/412,0.49%	2/10188	LOW
8bb30752-fd37-5d89-bb15-4fef8d1010c0	chr9:g.6015556C>G	Single base substitution	missense_variant RANBP6 E18Q	2/412,0.49%	2/10188	MODERATE
8bbddb28-b50b-55d1-b556-4f03140da469	chr11:g.47293880C>T	Single base substitution	splice_region_variant MADD None	2/412,0.49%	2/10188	LOW
8bf53d0f-b566-5ed2-b242-b18019fafa6c	chr1:g.62238306C>T	Single base substitution	missense_variant KANK4 A987T	2/412,0.49%	2/10188	MODERATE
8bf8129c-364a-52ef-affd-ba6a0822c3e3	chr3:g.179204536G>A	Single base substitution	missense_variant PIK3CA E365K	2/412,0.49%	7/10188	MODERATE
8c071d27-8d35-58dc-bc6d-48ba36284f99	chr1:g.153958423C>T	Single base substitution	synonymous_variant CRTC2 K25K	2/412,0.49%	2/10188	LOW
8c22e720-5d10-567a-bb3b-667aadee7500	chr19:g.30444052G>T	Single base substitution	missense_variant ZNF536 D164Y	2/412,0.49%	2/10188	MODERATE
8cd43188-43cc-5779-82d4-22e82d9c93f6	chr9:g.128624430G>A	Single base substitution	missense_variant SPTAN1 E1974K	2/412,0.49%	2/10188	MODERATE
8cd887d4-f9c8-5035-b47a-159cece3e402	chr16:g.57516328C>T	Single base substitution	missense_variant CCDC102A E462K	2/412,0.49%	2/10188	MODERATE
8ce0c86d-433a-5905-bbb1-fa6400702e9d	chr13:g.48360058C>T	Single base substitution	stop_gained RB1 Q217*	2/412,0.49%	3/10188	HIGH
8d42b1b9-a870-555b-ba82-cf6effed1074	chr10:g.30698440C>T	Single base substitution	non_coding_transcript_exon_variant SVILP1 None	2/412,0.49%	2/10188	MODIFIER
8d6eb4d5-798e-520b-890a-e01708507c83	chr6:g.145954764C>G	Single base substitution	missense_variant SHPRH E187Q	2/412,0.49%	2/10188	MODERATE
8d95426a-fc45-5beb-a838-a928d5534acf	chr3:g.129039793C>T	Single base substitution	missense_variant EFCC1 S581L	2/412,0.49%	2/10188	MODERATE
8deab0b6-511a-510c-8e44-24118981d01c	chr4:g.1804392G>A	Single base substitution	missense_variant FGFR3 G380R	2/412,0.49%	4/10188	MODERATE
8e2f0e06-4741-5cda-918b-36f09c072f0c	chr19:g.40843944C>T	Single base substitution	missense_variant CYP2A6 R446K	2/412,0.49%	2/10188	MODERATE
8e5891cc-a57b-55be-b6c0-82490a90defd	chr7:g.37920766C>T	Single base substitution	5_prime_UTR_variant EPDR1 None	2/412,0.49%	2/10188	MODIFIER
8e8ade56-ff8f-510a-8916-745799de9848	chr17:g.31295879G>C	Single base substitution	synonymous_variant OMG L151L	2/412,0.49%	2/10188	LOW
8e9c5e7c-f0ac-5a97-ab7e-9abe9e1e6695	chr4:g.61998233G>A	Single base substitution	synonymous_variant ADGRL3 L1053L	2/412,0.49%	2/10188	LOW
8ea10eef-8f5e-57b0-af38-b9a5918b1d60	chr7:g.149071328G>A	Single base substitution	stop_gained ZNF786 Q482*	2/412,0.49%	2/10188	HIGH
8ebbe4cd-3f29-5f98-ab46-1778a137f9a7	chr3:g.133805888G>A	Single base substitution	missense_variant SRPRB G14S	2/412,0.49%	2/10188	MODERATE
8ee88531-2c4b-583f-9356-f3e42857a618	chr2:g.96762061C>T	Single base substitution	synonymous_variant CNNM4 L354L	2/412,0.49%	2/10188	LOW
8ef497df-a975-5618-a123-9bfabf29ce1e	chr6:g.18122555C>T	Single base substitution	missense_variant NHLRC1 E18K	2/412,0.49%	2/10188	MODERATE
8f21c5b6-e379-515a-828d-cba4d43bf648	chr22:g.36301536G>A	Single base substitution	stop_gained MYH9 Q877*	2/412,0.49%	2/10188	HIGH
8f4f3918-7795-5638-b85d-3009de7e4975	chrX:g.48688690G>C	Single base substitution	missense_variant WAS R321P	2/412,0.49%	2/10188	MODERATE
8f5fc01f-fb4f-59f2-a1fa-b55c1acd859a	chr17:g.7076976G>A	Single base substitution	stop_gained CLEC10A Q66*	2/412,0.49%	2/10188	HIGH
8f63188c-e615-5875-aed8-0d66cf975c21	chr10:g.3781749C>T	Single base substitution	missense_variant KLF6 D190N	2/412,0.49%	3/10188	MODERATE
8fb7cacb-4b2f-5175-ab98-a7e29ae5f024	chr1:g.43957455C>T	Single base substitution	synonymous_variant IPO13 V482V	2/412,0.49%	2/10188	LOW
8fea2931-fa6b-583f-bca4-b819e8ba3d4d	chr16:g.3749626C>T	Single base substitution	splice_donor_variant CREBBP X1279_splice	2/412,0.49%	2/10188	HIGH
904cb2c7-ec65-5362-9b5d-09831507e091	chr3:g.149502679G>C	Single base substitution	missense_variant TM4SF4 D199H	2/412,0.49%	2/10188	MODERATE
906aa850-ea8c-59e2-a9a5-e7e2ccc2a47e	chr11:g.111766320C>T	Single base substitution	synonymous_variant PPP2R1B A14A	2/412,0.49%	2/10188	LOW
90823d0e-c6dc-562b-a5b6-34ac82c2428f	chr17:g.7675131C>T	Single base substitution	missense_variant TP53 A161T	2/412,0.49%	6/10188	MODERATE
90c87646-687f-536c-b6f7-acb93e550758	chr17:g.3530073G>A	Single base substitution	missense_variant TRPV3 T399M	2/412,0.49%	2/10188	MODERATE
90e7267e-b696-5bd6-b7bc-9238b49b2e81	chr16:g.4895713G>A	Single base substitution	missense_variant PPL H326Y	2/412,0.49%	2/10188	MODERATE
91de7ed5-df7e-5ddb-ba59-ba5340cdfaac	chr20:g.63564957C>G	Single base substitution	missense_variant HELZ2 E1289Q	2/412,0.49%	2/10188	MODERATE
92087b04-1209-5f5c-b01f-ce6a621416fd	chr2:g.119245508G>C	Single base substitution	missense_variant STEAP3 E4D	2/412,0.49%	2/10188	MODERATE
9220cb1e-f8e4-5642-b484-76420d0ee5fa	chr6:g.43509710G>T	Single base substitution	missense_variant LRRC73 R26S	2/412,0.49%	2/10188	MODERATE
9230e5fe-93a4-5c2d-8fe9-c81c0b0c03cb	chr2:g.222232280G>A	Single base substitution	missense_variant PAX3 S197L	2/412,0.49%	3/10188	MODERATE
9254a08f-cc02-52ab-bbcc-753a720307d6	chr12:g.43532071G>A	Single base substitution	missense_variant ADAMTS20 S193F	2/412,0.49%	3/10188	MODERATE
9254ff94-87cd-584f-8d47-1ef93f649459	chr18:g.9255146G>A	Single base substitution	missense_variant ANKRD12 E627K	2/412,0.49%	2/10188	MODERATE
92631787-77d6-502a-bb81-49d42b83dd81	chr6:g.26156329C>G	Single base substitution	upstream_gene_variant HIST1H2BD None	2/412,0.49%	2/10188	MODIFIER
9264d25b-4950-526a-bcff-52dd738c520a	chr19:g.2110748G>A	Single base substitution	missense_variant AP3D1 S983F	2/412,0.49%	2/10188	MODERATE
926896a3-521f-5fe3-9887-e046f0f726f3	chr7:g.150742459C>G	Single base substitution	missense_variant GIMAP5 S107C	2/412,0.49%	2/10188	MODERATE
92a1768e-58d4-5e52-91c6-5e7e2bebae09	chr16:g.71537731G>A	Single base substitution	missense_variant CHST4 D352N	2/412,0.49%	3/10188	MODERATE
92f54557-8234-52d7-855e-cb6493a48e56	chr4:g.151760932G>A	Single base substitution	synonymous_variant GATB F17F	2/412,0.49%	4/10188	LOW
93100d7c-3d38-50a0-8fa3-1b1564c96f06	chr2:g.55588911C>G	Single base substitution	missense_variant SMEK2 E323Q	2/412,0.49%	2/10188	MODERATE
93ba2efc-2be9-5c09-aeee-b5c8a0865fca	chr11:g.94063624G>A	Single base substitution	missense_variant HEPHL1 D178N	2/412,0.49%	2/10188	MODERATE
93cf863c-6899-5c9d-8587-dc80e6841daf	chr5:g.141180381G>C	Single base substitution	missense_variant PCDHB8 E783Q	2/412,0.49%	2/10188	MODERATE
93f95963-1119-56db-937c-3df50b766f76	chr15:g.24968010C>T	Single base substitution	synonymous_variant SNURF F63F	2/412,0.49%	3/10188	LOW
94686a07-1c91-5263-83e9-5de3d782fc52	chr6:g.36684104delGTCAGAACCGGCTGGGGATGTCC	Small deletion	frameshift_variant CDKN1A A5Mfs*23	2/412,0.49%	2/10188	HIGH
94c3f6c0-fa0a-566c-8041-3308ac9ffead	chr1:g.143904394G>C	Single base substitution	downstream_gene_variant HIST2H3PS2 None	2/412,0.49%	2/10188	MODIFIER
95192c6c-5932-513e-929b-4a1d3e4a9820	chr19:g.8551748C>T	Single base substitution	missense_variant MYO1F E255K	2/412,0.49%	2/10188	MODERATE
95273787-e4cc-5a78-9753-bb158cdffb37	chr19:g.57687997C>G	Single base substitution	synonymous_variant ZNF551 L574L	2/412,0.49%	2/10188	LOW
95414a47-8d8d-50c2-b66f-8ac06267ce59	chr11:g.65503624G>C	Single base substitution	upstream_gene_variant MALAT1 None	2/412,0.49%	2/10188	MODIFIER
95554ecc-55b3-5608-b267-50f5b087d3bf	chr4:g.161542584C>T	Single base substitution	synonymous_variant FSTL5 L375L	2/412,0.49%	2/10188	LOW
9589591c-ca60-5113-938b-4d6812e0e571	chr12:g.827130C>G	Single base substitution	missense_variant WNK1 R341G	2/412,0.49%	2/10188	MODERATE
959ee4e0-f44f-566c-a6c4-be07fa745705	chr19:g.10491954C>T	Single base substitution	synonymous_variant KEAP1 V316V	2/412,0.49%	2/10188	LOW
95beca49-dc15-5ef9-a885-1fb623fa4ca2	chr15:g.72163307C>T	Single base substitution	synonymous_variant GRAMD2 L305L	2/412,0.49%	2/10188	LOW
95c30d9a-2bb1-5cd2-92bd-d9bf4deae0d4	chr17:g.39708403G>A	Single base substitution	missense_variant ERBB2 R103Q	2/412,0.49%	2/10188	MODERATE
95d3259a-769f-5552-b4cd-6028a022acae	chr15:g.88858972G>C	Single base substitution	synonymous_variant ACAN L2129L	2/412,0.49%	2/10188	LOW
9643ebcc-1d85-58ed-95f6-7398b6524729	chr10:g.4835735C>G	Single base substitution	missense_variant AKR1E2 R129G	2/412,0.49%	2/10188	MODERATE
96553db3-f609-556b-ad16-3538f89b8a69	chr6:g.26188766C>T	Single base substitution	stop_retained_variant HIST1H4D *104*	2/412,0.49%	2/10188	LOW
969f21ad-7acf-5b38-b307-6bb5d8c80246	chr1:g.155747914G>A	Single base substitution	downstream_gene_variant GON4L None	2/412,0.49%	2/10188	MODIFIER
96be35f0-35ca-5098-924b-d58f1add8bf3	chr5:g.132881085G>A	Single base substitution	missense_variant AFF4 R1156C	2/412,0.49%	4/10188	MODERATE
96d1eb3b-7f58-5c94-82d5-b5353589801d	chr1:g.237643419C>T	Single base substitution	synonymous_variant RYR2 I2438I	2/412,0.49%	3/10188	LOW
975b8eb4-c2d4-552f-b5ed-59099103497d	chr17:g.28361276G>C	Single base substitution	3_prime_UTR_variant TMEM199 None	2/412,0.49%	3/10188	MODIFIER
97641b11-daed-58d4-8670-9ad84477c8d0	chr4:g.110509758C>G	Single base substitution	stop_gained ENPEP S382*	2/412,0.49%	2/10188	HIGH
979070bb-2df8-570b-a9bb-f2866bd496df	chrX:g.101353289C>T	Single base substitution	missense_variant BTK E605K	2/412,0.49%	2/10188	MODERATE
97aacc2b-5a1c-5aa6-b5cc-1ed0431c54d7	chr9:g.39446410G>C	Single base substitution	non_coding_transcript_exon_variant ZNF658B None	2/412,0.49%	2/10188	MODIFIER
97e04e5a-d7ba-5c24-9a29-0cd35973f690	chr19:g.48497496G>A	Single base substitution	synonymous_variant LMTK3 L1191L	2/412,0.49%	2/10188	LOW
98168592-3c89-536f-89ec-a590ecdce75f	chr20:g.64092864C>T	Single base substitution	synonymous_variant OPRL1 L48L	2/412,0.49%	2/10188	LOW
9845217d-29ce-5267-bd28-b5cef15e3bce	chr10:g.26216809G>T	Single base substitution	5_prime_UTR_variant GAD2 None	2/412,0.49%	2/10188	MODIFIER
98a14697-0d2f-5a2a-9584-000695923333	chr19:g.42924809C>T	Single base substitution	stop_retained_variant PSG7 *420*	2/412,0.49%	2/10188	LOW
98e01e7b-e06a-5c32-9f36-92792595ba04	chr13:g.23332877G>A	Single base substitution	missense_variant SACS H3667Y	2/412,0.49%	3/10188	MODERATE
99e001fb-8a6b-5658-9044-db129fba760d	chr1:g.93582718G>A	Single base substitution	synonymous_variant BCAR3 L423L	2/412,0.49%	2/10188	LOW
9a0c4ca7-e92d-55bb-bbc6-4200d9ff19e8	chr20:g.2658474C>T	Single base substitution	3_prime_UTR_variant IDH3B None	2/412,0.49%	2/10188	MODIFIER
9a2546a2-59b8-5905-b1ab-c79e5a2ec501	chr6:g.25465937G>A	Single base substitution	missense_variant LRRC16A D227N	2/412,0.49%	2/10188	MODERATE
9a39670d-7c25-5851-809f-8dc178409486	chr1:g.182858578C>G	Single base substitution	missense_variant DHX9 Q280E	2/412,0.49%	2/10188	MODERATE
9abee3a3-5f47-50ec-8a0d-66f0ea66a36e	chr10:g.88583239C>T	Single base substitution	upstream_gene_variant RNLS None	2/412,0.49%	2/10188	MODIFIER
9b086b22-2af4-5cfe-a007-8509367dc4c9	chr13:g.48452997C>T	Single base substitution	missense_variant RB1 S567L	2/412,0.49%	2/10188	MODERATE
9b229892-420b-53c8-a014-dd711fcc23fb	chr4:g.48860853C>G	Single base substitution	3_prime_UTR_variant OCIAD1 None	2/412,0.49%	2/10188	MODIFIER
9b584a41-c352-5d2e-afae-adadc8b31d3e	chr1:g.153958547C>G	Single base substitution	5_prime_UTR_variant CRTC2 None	2/412,0.49%	2/10188	MODIFIER
9bc1e8e9-22cf-5467-8bc8-ec67e1a54ee1	chr2:g.214948708G>A	Single base substitution	missense_variant ABCA12 S2331L	2/412,0.49%	3/10188	MODERATE
9bd3afcf-3a38-5d4d-af48-109a9d3439d6	chr3:g.157364366G>C	Single base substitution	missense_variant VEPH1 S425C	2/412,0.49%	2/10188	MODERATE
9c321709-33b1-5d95-a327-686e965ff114	chr14:g.57269266C>T	Single base substitution	5_prime_UTR_variant AP5M1 None	2/412,0.49%	2/10188	MODIFIER
9c841abc-afa8-5c4e-ad8c-eb04f04c2ed6	chr17:g.7846673C>T	Single base substitution	missense_variant KDM6B S215L	2/412,0.49%	2/10188	MODERATE
9ccac295-6bc6-5778-981a-3f6ebb3646a0	chr1:g.158755226C>T	Single base substitution	synonymous_variant OR6K6 I137I	2/412,0.49%	2/10188	LOW
9cdf7ba6-5b2d-513c-a1a7-105366ab4bad	chr19:g.758421C>T	Single base substitution	missense_variant MISP P492L	2/412,0.49%	2/10188	MODERATE
9cf89d97-15f0-53a3-b7ed-43a481ab66f2	chr5:g.55767913C>T	Single base substitution	missense_variant DDX4 R123W	2/412,0.49%	3/10188	MODERATE
9d5deeac-30c2-52d3-9587-b3e142f7f59c	chr7:g.6140952G>C	Single base substitution	missense_variant USP42 D255H	2/412,0.49%	2/10188	MODERATE
9d9b2ee9-e8cb-5a2f-8832-832422cfd17d	chr19:g.3736307G>A	Single base substitution	missense_variant TJP3 D424N	2/412,0.49%	2/10188	MODERATE
9dcdb912-c666-55e9-9f04-e4d82691b460	chr19:g.40560156C>T	Single base substitution	splice_region_variant SPTBN4 None	2/412,0.49%	2/10188	LOW
9ddfaec2-61c9-5caf-afa5-2373dfb5e8e3	chr1:g.11037780A>G	Single base substitution	synonymous_variant MASP2 P307P	2/412,0.49%	2/10188	LOW
9defe97f-0f9a-5eef-aeca-d3037c97dedf	chr19:g.11008022G>C	Single base substitution	missense_variant SMARCA4 E708Q	2/412,0.49%	2/10188	MODERATE
9e0df045-ce5c-50fd-8808-7fc327b49954	chr21:g.36245566G>A	Single base substitution	missense_variant DOPEY2 E1196K	2/412,0.49%	2/10188	MODERATE
9e12fc05-a68b-58a5-bce4-1aaa6f53f5de	chr5:g.83537010G>A	Single base substitution	missense_variant VCAN R1336Q	2/412,0.49%	2/10188	MODERATE
9e340108-714c-56c6-8952-07e81735c25a	chr17:g.7675160G>T	Single base substitution	missense_variant TP53 P151H	2/412,0.49%	7/10188	MODERATE
9e5103d2-cacd-567c-93a2-8a5662cefe44	chr8:g.143813523G>A	Single base substitution	synonymous_variant SCRIB L150L	2/412,0.49%	2/10188	LOW
9e63e599-87c0-5e87-bd9a-2052b6a83ad5	chr22:g.37300938G>A	Single base substitution	missense_variant CYTH4 E156K	2/412,0.49%	2/10188	MODERATE
9e717b79-407a-51f0-8e79-b241febf2151	chr19:g.8126493C>T	Single base substitution	synonymous_variant FBN3 G843G	2/412,0.49%	2/10188	LOW
9f088ea0-aa49-5577-96f5-7c86e58553d2	chr6:g.1313139delCAA	Small deletion	inframe_deletion FOXQ1 N146del	2/412,0.49%	2/10188	MODERATE
9f2a6d42-64c4-501b-8d03-5d078e451677	chr10:g.105262433C>T	Single base substitution	synonymous_variant SORCS3 L1182L	2/412,0.49%	2/10188	LOW
9f4166c2-e8ac-5238-b6c0-490cab63933c	chr6:g.44248681C>T	Single base substitution	stop_gained HSP90AB1 Q18*	2/412,0.49%	2/10188	HIGH
9f4c5333-93b8-5e5b-89e9-bb179a5554ac	chr17:g.443455G>T	Single base substitution	missense_variant FAM101B F48L	2/412,0.49%	2/10188	MODERATE
9f7482b1-a7e1-5dab-a813-28f8b74d0b11	chr17:g.7673761C>A	Single base substitution	stop_gained TP53 E287*	2/412,0.49%	4/10188	HIGH
9f7f89c4-587e-51b0-8446-100ae8535df3	chr1:g.148952967C>T	Single base substitution	intron_variant PDE4DIP None	2/412,0.49%	2/10188	MODIFIER
9fa63c00-8ee1-5c94-8129-6f15dc67d5c0	chr2:g.218782393C>T	Single base substitution	stop_gained CYP27A1 Q71*	2/412,0.49%	2/10188	HIGH
9fd13659-749b-5afc-8549-b8dff6d8a083	chr6:g.35955235G>C	Single base substitution	missense_variant SLC26A8 L717V	2/412,0.49%	2/10188	MODERATE
a0249492-8a78-51c8-a0c3-ea00c881001a	chr2:g.118843097G>A	Single base substitution	synonymous_variant EN1 L340L	2/412,0.49%	2/10188	LOW
a0cf0f41-9d8f-574e-b0a2-cd3c9328c8ed	chr1:g.151169050G>A	Single base substitution	missense_variant SCNM1 D220N	2/412,0.49%	2/10188	MODERATE
a105c82c-b595-5ada-9ce1-d80918978f30	chr10:g.119826658C>T	Single base substitution	synonymous_variant INPP5F I759I	2/412,0.49%	2/10188	LOW
a1916232-7972-525c-8ae1-efaa37fd1bfc	chr11:g.119173996C>G	Single base substitution	synonymous_variant NLRX1 L249L	2/412,0.49%	2/10188	LOW
a198456b-9fae-53e8-8ed9-961000c13e77	chr2:g.97792575C>T	Single base substitution	missense_variant TMEM131 E1319K	2/412,0.49%	3/10188	MODERATE
a1b8ab65-23f9-5599-ab0e-6ffe9ea0b0b6	chr22:g.19964215G>A	Single base substitution	synonymous_variant COMT K177K	2/412,0.49%	2/10188	LOW
a1d8f867-49cd-51b9-a438-3ef47ac70b11	chr9:g.127658431C>G	Single base substitution	missense_variant STXBP1 L76V	2/412,0.49%	2/10188	MODERATE
a1f5db8a-afa3-5ebd-8c42-be550a9210c4	chr10:g.93600975C>T	Single base substitution	synonymous_variant RBP4 A18A	2/412,0.49%	2/10188	LOW
a200a267-beed-5394-8711-dfa255f249a6	chr12:g.121442668C>T	Single base substitution	missense_variant KDM2B E925K	2/412,0.49%	2/10188	MODERATE
a272e2d5-8d93-5933-a3a6-cb4ab3654f9f	chr3:g.184291425G>A	Single base substitution	missense_variant ECE2 V821M	2/412,0.49%	2/10188	MODERATE
a2870968-f168-5824-948a-45430ff95852	chr3:g.192798931G>A	Single base substitution	stop_gained MB21D2 Q311*	2/412,0.49%	6/10188	HIGH
a2cd9a6b-6eb7-5b86-b957-4e28b4ee8d12	chr20:g.46726976C>T	Single base substitution	synonymous_variant SLC2A10 L467L	2/412,0.49%	2/10188	LOW
a3183708-4222-5941-a15b-de164b8c0e31	chr19:g.54114668G>A	Single base substitution	missense_variant TFPT S19L	2/412,0.49%	2/10188	MODERATE
a373f251-b84b-568c-b1fb-46d161ea2fcb	chr3:g.14704595C>G	Single base substitution	missense_variant C3orf20 F379L	2/412,0.49%	2/10188	MODERATE
a3ea764a-d1d2-5a56-bf0a-475ce10f9656	chr15:g.52340354C>T	Single base substitution	missense_variant MYO5A E1361K	2/412,0.49%	2/10188	MODERATE
a40cb672-8e67-5938-be6d-1695bc9bd8b3	chr11:g.74098097C>G	Single base substitution	missense_variant C2CD3 R964T	2/412,0.49%	2/10188	MODERATE
a4293f83-a7c4-5f73-8833-61089de1c7ad	chr3:g.49720515G>C	Single base substitution	missense_variant RNF123 E1169Q	2/412,0.49%	2/10188	MODERATE
a431b3b4-e19f-519b-8790-4add6ee26d6b	chr12:g.132750850C>G	Single base substitution	splice_acceptor_variant ANKLE2 X214_splice	2/412,0.49%	2/10188	HIGH
a43758b7-fe67-56e3-a591-5ca3bd49b70e	chr12:g.104805131G>C	Single base substitution	3_prime_UTR_variant SLC41A2 None	2/412,0.49%	2/10188	MODIFIER
a457a8ef-577d-5dd0-b34f-fd5a2bcc9d93	chr11:g.62649487G>A	Single base substitution	missense_variant INTS5 S198L	2/412,0.49%	2/10188	MODERATE
a466da1e-036a-537c-8dfd-7f6c7651605a	chr9:g.137156754G>A	Single base substitution	missense_variant GRIN1 E253K	2/412,0.49%	2/10188	MODERATE
a485ac8b-5e1e-523d-8f2e-b90f50e61a02	chr8:g.56073728G>A	Single base substitution	synonymous_variant RPS20 L48L	2/412,0.49%	2/10188	LOW
a4ae738e-587a-5e33-8e24-457cb08d9294	chr11:g.75204594C>T	Single base substitution	3_prime_UTR_variant SLCO2B1 None	2/412,0.49%	2/10188	MODIFIER
a4b37dc5-4ea5-5c15-9bba-ca01039c584e	chr17:g.4934218C>T	Single base substitution	synonymous_variant GP1BA L538L	2/412,0.49%	2/10188	LOW
a4bdbebe-a4e5-5736-8227-90552e4cbae1	chr6:g.26184017C>T	Single base substitution	synonymous_variant HIST1H2BE I74I	2/412,0.49%	3/10188	LOW
a53e3078-3464-57fe-bf83-b4e46fa76e17	chr2:g.32114737C>T	Single base substitution	missense_variant SPAST S261L	2/412,0.49%	2/10188	MODERATE
a5d6936f-cd62-5a15-85bd-926ef521a1d1	chr21:g.31146978G>A	Single base substitution	missense_variant TIAM1 S1131L	2/412,0.49%	2/10188	MODERATE
a60be377-15c0-51de-8dfc-e15ee8ff9009	chr1:g.152112337C>G	Single base substitution	missense_variant TCHH E294Q	2/412,0.49%	2/10188	MODERATE
a6406224-d69d-5a5d-9530-1ff8a4909cfa	chr17:g.7674229C>A	Single base substitution	missense_variant TP53 G245V	2/412,0.49%	19/10188	MODERATE
a69502c0-3754-53fb-99d2-ad49ea1037b7	chr1:g.118081449C>T	Single base substitution	missense_variant SPAG17 M652I	2/412,0.49%	2/10188	MODERATE
a6b1cb4d-00ed-5861-9d5e-bf0414cd2db8	chr14:g.90786245G>A	Single base substitution	stop_gained TTC7B R69*	2/412,0.49%	2/10188	HIGH
a6bb1496-8c59-5781-9c18-1cc66b8dc8f9	chr17:g.47404602G>C	Single base substitution	missense_variant EFCAB13 L734F	2/412,0.49%	2/10188	MODERATE
a7833087-a181-55e4-99da-d675e13d32ee	chr12:g.43550991G>A	Single base substitution	missense_variant ADAMTS20 S124L	2/412,0.49%	3/10188	MODERATE
a79d159f-0334-5695-b445-0c7679edf7e3	chr4:g.172229709G>C	Single base substitution	missense_variant GALNTL6 L64F	2/412,0.49%	2/10188	MODERATE
a79f6f8f-f211-5d3f-ac74-cceae83c4d52	chr5:g.40841465C>T	Single base substitution	missense_variant CARD6 S28F	2/412,0.49%	2/10188	MODERATE
a7c98476-b7c1-5f42-bd04-77e6fb65cd4e	chr20:g.50610859G>A	Single base substitution	synonymous_variant FAM65C I136I	2/412,0.49%	2/10188	LOW
a822b5ac-7a9c-52cb-8f94-779679a9e1fe	chr17:g.69523536C>T	Single base substitution	synonymous_variant MAP2K6 L186L	2/412,0.49%	2/10188	LOW
a8504c63-382a-5766-842e-727a11499a48	chr5:g.52800832C>T	Single base substitution	synonymous_variant PELO L146L	2/412,0.49%	2/10188	LOW
a8bac623-aa29-5c1c-86e1-808550e4f436	chr15:g.68945897C>G	Single base substitution	missense_variant SPESP1 F121L	2/412,0.49%	2/10188	MODERATE
a904a807-8f57-5754-8f4e-e37ec07b5702	chr16:g.81939914C>G	Single base substitution	missense_variant PLCG2 I1112M	2/412,0.49%	2/10188	MODERATE
a9286a35-851f-57a2-8f52-1635e480214b	chr5:g.149896719C>T	Single base substitution	missense_variant PDE6A E489K	2/412,0.49%	2/10188	MODERATE
a9467e95-21df-5195-846e-fae434b5b6c5	chr4:g.99608946C>G	Single base substitution	missense_variant MTTP Q580E	2/412,0.49%	2/10188	MODERATE
a99bc0c0-1bfb-56ca-b416-d9d31d703924	chr14:g.105600309C>G	Single base substitution	missense_variant IGHE Q348H	2/412,0.49%	2/10188	MODERATE
a9ad6417-e457-5439-a4bd-db8fbeab2ec0	chr6:g.26158241G>A	Single base substitution	synonymous_variant HIST1H2BD K24K	2/412,0.49%	4/10188	LOW
a9c7ff0a-2371-5b92-a113-ff81a2e500da	chr2:g.96761468G>A	Single base substitution	missense_variant CNNM4 D157N	2/412,0.49%	2/10188	MODERATE
a9dc27d0-e7b6-5bb6-aff8-9c059760cbbc	chr7:g.70790934C>T	Single base substitution	synonymous_variant AUTS2 L1240L	2/412,0.49%	3/10188	LOW
a9ed209d-4f9f-51da-9d71-631fc61bca49	chr12:g.25245351C>A	Single base substitution	missense_variant KRAS G12C	2/412,0.49%	94/10188	MODERATE
aa9dc8d5-6184-5af2-9022-894acd55329b	chr11:g.68980824G>A	Single base substitution	stop_gained MRGPRD R55*	2/412,0.49%	3/10188	HIGH
ab3be774-0311-5c7a-bbc5-b46ea2de15d9	chr19:g.47069098C>T	Single base substitution	missense_variant ZC3H4 E798K	2/412,0.49%	2/10188	MODERATE
ab6de559-9dcc-5e88-be6e-6302db27a303	chr11:g.121125839C>A	Single base substitution	missense_variant TECTA P581T	2/412,0.49%	2/10188	MODERATE
ab7b4e9b-c6de-5027-b689-f69b5cb5d787	chr9:g.21971037C>A	Single base substitution	missense_variant CDKN2A D108Y	2/412,0.49%	10/10188	MODERATE
ab999c83-8173-5bbd-884b-a077b4cf00ef	chr1:g.144427921T>C	Single base substitution	synonymous_variant NBPF15 S370S	2/412,0.49%	23/10188	LOW
aba21d5e-fd5c-52f8-95ed-c5caba760436	chr1:g.155264729C>G	Single base substitution	missense_variant CLK2 D327H	2/412,0.49%	2/10188	MODERATE
abbb86b8-6195-5db3-a370-279948b6b3a4	chr13:g.73061952C>T	Single base substitution	missense_variant KLF5 S118L	2/412,0.49%	2/10188	MODERATE
abed3a72-fe5e-55ea-888a-99c87d370ccb	chr22:g.20427488C>G	Single base substitution	missense_variant SCARF2 E535Q	2/412,0.49%	3/10188	MODERATE
ace77b0a-04c1-5c72-8696-0c9c90b2915a	chr16:g.24572061G>C	Single base substitution	synonymous_variant RBBP6 L1665L	2/412,0.49%	2/10188	LOW
ad15a34f-cadc-5bb1-ad28-005b0a0072eb	chr20:g.47684560C>T	Single base substitution	synonymous_variant SULF2 A253A	2/412,0.49%	2/10188	LOW
ad80dab8-5cf9-58da-b0cf-70fa4212f8d6	chr21:g.42121092G>A	Single base substitution	missense_variant UMODL1 D899N	2/412,0.49%	2/10188	MODERATE
adca2ebd-5197-5c7d-8eae-7b8a574e3ef5	chr12:g.99154389C>T	Single base substitution	missense_variant ANKS1B R809K	2/412,0.49%	2/10188	MODERATE
adea4b1e-0b25-5139-b50f-c64727e7296f	chr17:g.41395269G>A	Single base substitution	synonymous_variant KRT31 I284I	2/412,0.49%	2/10188	LOW
aea1a89c-60bb-568d-9343-13271676d684	chr18:g.7044770G>A	Single base substitution	stop_gained LAMA1 Q310*	2/412,0.49%	2/10188	HIGH
aef44c95-f1a3-5830-8288-59b9ee14775f	chr2:g.169162565C>T	Single base substitution	missense_variant LRP2 E3932K	2/412,0.49%	2/10188	MODERATE
af0b0feb-f5a8-5d4f-80c9-1ac9b7fdf929	chr5:g.137887257C>T	Single base substitution	stop_gained MYOT R457*	2/412,0.49%	2/10188	HIGH
af40955a-f8c7-5200-bff9-bcad24bfe922	chr3:g.183195235C>G	Single base substitution	missense_variant MCF2L2 E969Q	2/412,0.49%	2/10188	MODERATE
af555c10-15e6-57ef-b07e-22bc2abc42c3	chr19:g.10682606G>A	Single base substitution	missense_variant ILF3 E484K	2/412,0.49%	2/10188	MODERATE
af75db0a-5d13-5d27-acf8-d60c74eba3de	chr1:g.109543417C>T	Single base substitution	missense_variant GPR61 S132L	2/412,0.49%	3/10188	MODERATE
afa235f6-710b-507e-932c-69477bf25c20	chr7:g.135645565G>A	Single base substitution	synonymous_variant NUP205 S1927S	2/412,0.49%	2/10188	LOW
afc6fa55-2b4a-5913-8d5d-1b8782a9bd8f	chr5:g.141151234C>T	Single base substitution	missense_variant PCDHB6 S326L	2/412,0.49%	2/10188	MODERATE
afe855c6-2e18-5944-8f18-50f7c1c07b71	chr16:g.3738650C>G	Single base substitution	missense_variant CREBBP D1435H	2/412,0.49%	2/10188	MODERATE
aff8481c-9664-5a5f-8e9a-073922e12e33	chr17:g.31296180G>A	Single base substitution	missense_variant OMG S51F	2/412,0.49%	2/10188	MODERATE
b06245c8-efa7-546d-9859-ef593bf2f039	chr19:g.49409219G>C	Single base substitution	missense_variant CCDC155 R361T	2/412,0.49%	2/10188	MODERATE
b0d2b59d-6e32-563c-ae0c-201bb668bcdc	chr5:g.124701216G>A	Single base substitution	synonymous_variant ZNF608 L320L	2/412,0.49%	2/10188	LOW
b116becb-0c60-5504-b9e7-82a8b077001c	chr1:g.39484676G>A	Single base substitution	missense_variant MACF1 D7286N	2/412,0.49%	2/10188	MODERATE
b135355f-fa84-5f45-862d-9c249f5f8756	chr9:g.21971112G>A	Single base substitution	missense_variant CDKN2A H83Y	2/412,0.49%	15/10188	MODERATE
b18e385f-18d5-5d99-b409-0c6f89a1b653	chr7:g.44764448C>T	Single base substitution	synonymous_variant ZMIZ2 L630L	2/412,0.49%	2/10188	LOW
b1909f22-17d2-52ec-b695-f6ab630c603a	chr1:g.44008435G>A	Single base substitution	missense_variant SLC6A9 R243W	2/412,0.49%	2/10188	MODERATE
b1b689e3-484c-57bd-bf41-aea3da7c943d	chr17:g.43545340C>T	Single base substitution	missense_variant ETV4 E30K	2/412,0.49%	4/10188	MODERATE
b2329ca6-26c7-548e-9fb2-b5e1b85ec404	chr17:g.58696787G>A	Single base substitution	missense_variant RAD51C D167N	2/412,0.49%	2/10188	MODERATE
b23535de-7668-56cd-99cf-71aada3f004f	chr16:g.10902760C>G	Single base substitution	missense_variant CIITA S244C	2/412,0.49%	2/10188	MODERATE
b287d314-d702-5ff2-bbc4-478c8b2c9e5d	chr5:g.79619697C>T	Single base substitution	stop_gained PAPD4 Q17*	2/412,0.49%	2/10188	HIGH
b2a6e643-0069-5d44-bfec-4764d8f3e4b9	chr6:g.32053706C>T	Single base substitution	splice_acceptor_variant TNXB X543_splice	2/412,0.49%	2/10188	HIGH
b2b9b231-1434-5837-b880-060244c900a1	chr16:g.67257350G>C	Single base substitution	missense_variant SLC9A5 L447F	2/412,0.49%	2/10188	MODERATE
b2d8f60c-821a-59dc-ba0c-91b973fa5287	chr6:g.121112614G>A	Single base substitution	missense_variant TBC1D32 S1072F	2/412,0.49%	2/10188	MODERATE
b409c5c9-6957-5dc5-8742-c7dfe631fcce	chr22:g.19852217G>C	Single base substitution	missense_variant C22orf29 I15M	2/412,0.49%	2/10188	MODERATE
b46279d0-1dd0-5ebb-b625-a7298a0248a4	chr12:g.55748967C>T	Single base substitution	missense_variant GDF11 P276L	2/412,0.49%	2/10188	MODERATE
b4891500-54ed-5f10-9bc6-e8b969805122	chr3:g.186717504G>A	Single base substitution	5_prime_UTR_variant KNG1 None	2/412,0.49%	2/10188	MODIFIER
b496476a-fce1-5336-b368-c8462a881697	chr1:g.26773884C>T	Single base substitution	stop_gained ARID1A Q1363*	2/412,0.49%	3/10188	HIGH
b4bb6ba9-6f92-5ba3-90fe-90b937983acf	chr12:g.49188991C>T	Single base substitution	upstream_gene_variant TUBA1A None	2/412,0.49%	3/10188	MODIFIER
b4e320cc-968a-5727-a8c7-2020d98189d9	chr7:g.94427726C>T	Single base substitution	missense_variant COL1A2 R1123C	2/412,0.49%	4/10188	MODERATE
b518a0a6-f520-5553-b52b-71cb2733cbb7	chr3:g.39187132C>T	Single base substitution	missense_variant XIRP1 E772K	2/412,0.49%	2/10188	MODERATE
b54de547-ee30-5a42-98d3-15682cd59375	chr6:g.54326864G>A	Single base substitution	missense_variant TINAG R191H	2/412,0.49%	7/10188	MODERATE
b5686b55-4350-5146-8cee-dcb03b6769aa	chr7:g.88132930G>A	Single base substitution	synonymous_variant ADAM22 L352L	2/412,0.49%	2/10188	LOW
b59e2c82-e9b7-5e9f-93af-5d8420c7cb22	chr14:g.61762538C>T	Single base substitution	synonymous_variant SNAPC1 F26F	2/412,0.49%	2/10188	LOW
b5c3ff4b-bb4d-5441-9cd8-1e3d8a279065	chr19:g.45037892C>T	Single base substitution	3_prime_UTR_variant RELB None	2/412,0.49%	2/10188	MODIFIER
b5edf214-d82c-5ac9-a222-e1f50464bdbc	chr17:g.39723405G>A	Single base substitution	missense_variant ERBB2 R678Q	2/412,0.49%	14/10188	MODERATE
b6100377-09c2-57c5-b1af-3a8ad6d1f6a2	chr15:g.84839054G>A	Single base substitution	missense_variant ALPK3 E329K	2/412,0.49%	2/10188	MODERATE
b65571fe-9c30-595d-b4e9-c3fe4303fb96	chr1:g.109479621C>G	Single base substitution	3_prime_UTR_variant SYPL2 None	2/412,0.49%	2/10188	MODIFIER
b665529c-75ef-5b6f-9889-9374316f63cd	chr1:g.62263221C>T	Single base substitution	missense_variant KANK4 E804K	2/412,0.49%	2/10188	MODERATE
b690ad3f-9a2f-5b43-99df-5d42ddf1a538	chr6:g.38703004G>A	Single base substitution	synonymous_variant GLO1 L17L	2/412,0.49%	2/10188	LOW
b7466148-8ea6-5c79-9ebe-0d88938ef35b	chr9:g.128261241C>T	Single base substitution	missense_variant GOLGA2 E424K	2/412,0.49%	2/10188	MODERATE
b7500725-f0cb-529a-8d9d-be5112da1f78	chrX:g.135291027C>G	Single base substitution	missense_variant ZNF75D E269Q	2/412,0.49%	2/10188	MODERATE
b7977ab3-5236-5248-b908-95470f49863f	chr6:g.7229273C>T	Single base substitution	stop_gained RREB1 Q392*	2/412,0.49%	3/10188	HIGH
b79b3bc1-ae51-5dc6-a3b0-8897c76e556a	chr11:g.14835047C>T	Single base substitution	missense_variant PDE3B P758S	2/412,0.49%	2/10188	MODERATE
b7d91559-fe29-5608-a1ec-02007b4463c8	chr11:g.61009729G>A	Single base substitution	synonymous_variant CD6 E313E	2/412,0.49%	2/10188	LOW
b7e18bcb-cee7-5ecc-9e42-416d21ec3bfc	chr19:g.51994793G>A	Single base substitution	stop_gained ZNF615 Q95*	2/412,0.49%	2/10188	HIGH
b845a14a-78ea-5959-a645-2e90a0a4286c	chr3:g.20040759C>T	Single base substitution	synonymous_variant KAT2B L94L	2/412,0.49%	2/10188	LOW
b89afffd-4a3f-50d3-8dc9-b4a86b2828af	chr1:g.150511463G>A	Single base substitution	missense_variant ECM1 E239K	2/412,0.49%	2/10188	MODERATE
b8a8e51d-025f-533e-8214-b373ee6e7ba3	chr19:g.13214525C>G	Single base substitution	missense_variant CACNA1A D1939H	2/412,0.49%	2/10188	MODERATE
b8f9ec71-4c5c-5486-8eaf-4902a7938a14	chr17:g.4539347A>T	Single base substitution	3_prime_UTR_variant MYBBP1A None	2/412,0.49%	48/10188	MODIFIER
b925f54c-7cd9-5942-8e31-783b6f93e45f	chr19:g.39505310G>C	Single base substitution	missense_variant DLL3 D318H	2/412,0.49%	2/10188	MODERATE
b94116dd-0f55-5565-bae5-43b287780949	chr2:g.165115458C>T	Single base substitution	missense_variant SCN3A E1171K	2/412,0.49%	2/10188	MODERATE
b96ae33f-196e-5641-953b-fa999680051c	chr1:g.110223492G>A	Single base substitution	missense_variant KCNC4 E403K	2/412,0.49%	2/10188	MODERATE
b9822ca8-5f2b-5382-99cf-1fa4c0774fde	chr1:g.239908277G>A	Single base substitution	missense_variant CHRM3 E276K	2/412,0.49%	2/10188	MODERATE
b98d0631-3e37-5293-bd05-db628d122bd1	chr9:g.37429806G>C	Single base substitution	missense_variant GRHPR E190Q	2/412,0.49%	2/10188	MODERATE
b9f6241b-55dc-5972-a7fb-92311daff43c	chr1:g.23367988G>A	Single base substitution	synonymous_variant ZNF436 L6L	2/412,0.49%	2/10188	LOW
bac7548b-18d4-5b24-b271-90405ac09841	chr1:g.111350221G>A	Single base substitution	missense_variant PIFO E169K	2/412,0.49%	2/10188	MODERATE
badd22f8-b64c-50bf-a269-92b08995f1e2	chr11:g.119095162C>T	Single base substitution	missense_variant H2AFX R78Q	2/412,0.49%	2/10188	MODERATE
bb116d17-6238-5339-ada8-99e0e1fade1a	chr1:g.108192598G>C	Single base substitution	intron_variant SLC25A24 None	2/412,0.49%	2/10188	MODIFIER
bb2c6cee-5552-50c6-b681-0441fb1a2004	chr3:g.100713731C>T	Single base substitution	stop_gained TFG Q16*	2/412,0.49%	4/10188	HIGH
bb52ad4b-edaf-50ef-8051-7aa4f1a5076b	chr22:g.32084992C>T	Single base substitution	synonymous_variant SLC5A1 F326F	2/412,0.49%	2/10188	LOW
bc9ba25b-f05b-5459-81cd-3e802856c30b	chr8:g.12182802C>T	Single base substitution	3_prime_UTR_variant FAM86B1 None	2/412,0.49%	2/10188	MODIFIER
bcbb128b-29c7-54c4-afef-4a4bea42c674	chr20:g.54643515C>T	Single base substitution	missense_variant DOK5 R265C	2/412,0.49%	3/10188	MODERATE
bce57f1d-d94d-5d0f-b521-1e23c51c39c8	chrX:g.130069405G>A	Single base substitution	missense_variant ELF4 S361F	2/412,0.49%	2/10188	MODERATE
bdc4320f-5168-5812-b262-0a0b9a4c1303	chr17:g.7674187T>A	Single base substitution	missense_variant TP53 D259V	2/412,0.49%	6/10188	MODERATE
bdc4e03f-cdda-5706-ab78-f8a1983dc83b	chr2:g.178557468C>G	Single base substitution	missense_variant TTN G27624A	2/412,0.49%	2/10188	MODERATE
be033e81-1c55-58eb-88c1-458dec665518	chr2:g.20447688C>T	Single base substitution	missense_variant RHOB P75S	2/412,0.49%	2/10188	MODERATE
be0c0de4-ca2c-56c6-94c3-48ea5cda9020	chr2:g.218668253G>A	Single base substitution	stop_gained RNF25 Q69*	2/412,0.49%	2/10188	HIGH
be43c64a-d504-5812-b9b2-9d246b7f7f89	chr19:g.12379865G>A	Single base substitution	3_prime_UTR_variant CTD-3105H18.14 None	2/412,0.49%	2/10188	MODIFIER
be5978de-2cb3-58b2-b0bd-3d80b68a87ca	chr18:g.3119942G>A	Single base substitution	synonymous_variant MYOM1 N1015N	2/412,0.49%	2/10188	LOW
be8577e0-81ed-5d8c-a475-d91e8cbe412f	chr9:g.32632501G>A	Single base substitution	missense_variant TAF1L R1027C	2/412,0.49%	2/10188	MODERATE
be96578d-392d-591d-95f8-2cc568f2384b	chr1:g.161784013C>T	Single base substitution	stop_gained ATF6 Q91*	2/412,0.49%	3/10188	HIGH
be9a16b9-cc8b-5d0f-89e3-1ca188a377a2	chr8:g.53229519A>G	Single base substitution	synonymous_variant OPRK1 A307A	2/412,0.49%	2/10188	LOW
bece4006-2deb-5ffb-a760-8b2176747285	chr3:g.41224622C>G	Single base substitution	missense_variant CTNNB1 S37C	2/412,0.49%	17/10188	MODERATE
bee8322d-ca06-5a51-a74c-804ac109d2dc	chr4:g.9783229C>T	Single base substitution	synonymous_variant DRD5 I400I	2/412,0.49%	3/10188	LOW
bef4ae85-9f7a-5db7-94b6-dea8a19868d7	chr20:g.62881731C>T	Single base substitution	missense_variant DIDO1 E1409K	2/412,0.49%	5/10188	MODERATE
bf462e04-2b5c-5732-a23c-3cf3e1c0d658	chr11:g.721618G>A	Single base substitution	synonymous_variant EPS8L2 Q274Q	2/412,0.49%	3/10188	LOW
bf67a115-1064-50df-a04e-c03dfb55022b	chr2:g.197494722C>G	Single base substitution	missense_variant HSPD1 E181Q	2/412,0.49%	2/10188	MODERATE
c0316fde-3d58-5985-989b-cfc6d6347184	chr5:g.140786989C>T	Single base substitution	synonymous_variant PCDHA1 L233L	2/412,0.49%	3/10188	LOW
c048f178-e743-535f-9c0e-6a141b6f6f52	chr16:g.23689643C>T	Single base substitution	synonymous_variant PLK1 L525L	2/412,0.49%	2/10188	LOW
c05abc8b-f2fe-5cbe-a250-e838f01ee96c	chr1:g.67425128G>C	Single base substitution	missense_variant SERBP1 S187C	2/412,0.49%	2/10188	MODERATE
c069e38b-8ce2-50b7-bb03-9a4d9b8c30ad	chr19:g.57504675G>C	Single base substitution	missense_variant ZNF773 E18Q	2/412,0.49%	2/10188	MODERATE
c06dfd96-c815-5365-8edc-25652d11ce88	chr14:g.46841939G>C	Single base substitution	missense_variant MDGA2 R955G	2/412,0.49%	2/10188	MODERATE
c0a640a3-f0a8-541e-9ef1-e8bf77b7acda	chr19:g.32976595G>C	Single base substitution	synonymous_variant C19orf40 L187L	2/412,0.49%	2/10188	LOW
c0dbb3dd-db27-57aa-b675-54e0f32d32de	chr1:g.203773993C>T	Single base substitution	missense_variant LAX1 S170L	2/412,0.49%	3/10188	MODERATE
c0de032a-1699-5476-a87b-37d9cf480a2a	chr6:g.83139125C>T	Single base substitution	stop_gained DOPEY1 Q1695*	2/412,0.49%	2/10188	HIGH
c0f9e42d-84eb-519f-be26-f320bebf0f58	chr19:g.58053749G>A	Single base substitution	missense_variant ZSCAN1 E309K	2/412,0.49%	2/10188	MODERATE
c12944f3-ae61-5e36-b706-6dedf0182aca	chr4:g.40750897C>G	Single base substitution	missense_variant NSUN7 I68M	2/412,0.49%	2/10188	MODERATE
c150bb6a-10fc-5c4e-90c8-3f32def39173	chrX:g.96916544C>T	Single base substitution	missense_variant DIAPH2 S280F	2/412,0.49%	3/10188	MODERATE
c16cee03-d875-50c9-b620-9829fa5434c6	chr1:g.26732722C>G	Single base substitution	stop_gained ARID1A S617*	2/412,0.49%	2/10188	HIGH
c19728e9-71e6-5344-bb84-9c0714bd07f7	chr3:g.49123263G>A	Single base substitution	missense_variant LAMB2 R1365W	2/412,0.49%	3/10188	MODERATE
c1974672-6e65-5722-8c88-39a653cd914b	chr1:g.153986114G>A	Single base substitution	splice_region_variant RAB13 I41I	2/412,0.49%	2/10188	LOW
c19753b3-6293-5e99-92bd-645140007c51	chr12:g.56110670G>A	Single base substitution	missense_variant PA2G4 D274N	2/412,0.49%	2/10188	MODERATE
c1c058da-441a-565e-9cc6-920b9e9d4aa0	chr18:g.78994241C>T	Single base substitution	synonymous_variant SALL3 N750N	2/412,0.49%	3/10188	LOW
c1c333cd-9eb5-5f5f-b2ea-000c3d5cd121	chr7:g.92833129C>T	Single base substitution	synonymous_variant CDK6 L65L	2/412,0.49%	3/10188	LOW
c1e4d6f0-5192-515b-87f2-3c4dd4d468bb	chr3:g.48571132G>A	Single base substitution	missense_variant COL7A1 S2378F	2/412,0.49%	3/10188	MODERATE
c213b753-33d9-5d3d-83b8-1efa58a6e1da	chr2:g.89010439C>T	Single base substitution	intron_variant IGKC None	2/412,0.49%	2/10188	MODIFIER
c23e5003-4ea4-5985-acd9-71d250bdc8b7	chr5:g.140788475G>A	Single base substitution	missense_variant PCDHA1 E729K	2/412,0.49%	2/10188	MODERATE
c2bbc1c1-84f0-528d-92e3-4ddbeebaaefc	chr17:g.65014792C>G	Single base substitution	missense_variant GNA13 R200T	2/412,0.49%	2/10188	MODERATE
c34bd8d8-05d0-5c4f-87db-e5e219624d91	chr16:g.14929386C>T	Single base substitution	downstream_gene_variant MIR6511A3 None	2/412,0.49%	2/10188	MODIFIER
c3789b6b-fb72-5af8-b372-e55ab4059f03	chr5:g.134781972C>G	Single base substitution	missense_variant DDX46 Q311E	2/412,0.49%	2/10188	MODERATE
c37caee6-8c81-553f-b45a-9c48edd547b9	chr17:g.39724747G>T	Single base substitution	missense_variant ERBB2 V777L	2/412,0.49%	9/10188	MODERATE
c3b1d68b-97fc-52ff-aa37-97b2c1696bf8	chr1:g.204443591C>T	Single base substitution	synonymous_variant PIK3C2B L958L	2/412,0.49%	2/10188	LOW
c3c25b36-b0cc-5bf0-82c7-e57baedb5d86	chr2:g.218740161_218740162insTCACAGTT	Small insertion	frameshift_variant TTLL4 E531Vfs*13	2/412,0.49%	3/10188	HIGH
c3d98716-629e-5bf0-a79c-3320c454001d	chr19:g.37413565G>T	Single base substitution	missense_variant ZNF569 Q365K	2/412,0.49%	2/10188	MODERATE
c415414c-7235-5ae9-baf6-731fe5533ad3	chr21:g.30502052G>A	Single base substitution	synonymous_variant KRTAP19-5 Y13Y	2/412,0.49%	4/10188	LOW
c4755b49-a836-5ab3-8fa7-c1201e1274a6	chr2:g.73088400C>G	Single base substitution	synonymous_variant RAB11FIP5 L406L	2/412,0.49%	3/10188	LOW
c4782096-b9a2-5dcb-a0cc-623b0157b7e1	chr7:g.57120479G>A	Single base substitution	synonymous_variant ZNF479 L312L	2/412,0.49%	2/10188	LOW
c4ca01ca-c736-5632-9b31-1a24c967acc2	chrX:g.14020187C>G	Single base substitution	missense_variant GEMIN8 E121D	2/412,0.49%	2/10188	MODERATE
c523cc24-6ecc-5ba6-800f-e516ae0d8d5c	chr17:g.7674890T>C	Single base substitution	missense_variant TP53 H214R	2/412,0.49%	16/10188	MODERATE
c529d8eb-70cf-5920-8c08-6ac550e34c6a	chr2:g.79086530C>T	Single base substitution	intron_variant REG1B None	2/412,0.49%	2/10188	MODIFIER
c533e41f-4248-564f-a6a9-9f90ab6ec6d2	chr7:g.20785653G>A	Single base substitution	missense_variant SP8 S37L	2/412,0.49%	2/10188	MODERATE
c53e4fa7-a2e6-5dd2-8aef-af9af433d793	chr1:g.201002320C>T	Single base substitution	missense_variant KIF21B E415K	2/412,0.49%	2/10188	MODERATE
c57edcd7-9848-5a15-9e0a-87598985122b	chr1:g.17695146C>G	Single base substitution	intron_variant ARHGEF10L None	2/412,0.49%	2/10188	MODIFIER
c5fad795-8156-5ca2-a4fb-a667086bbf05	chr3:g.120167670G>A	Single base substitution	missense_variant GPR156 R603W	2/412,0.49%	3/10188	MODERATE
c605e4b7-723f-538b-b4da-2a7461bf652e	chr10:g.73792577G>A	Single base substitution	missense_variant ZSWIM8 E680K	2/412,0.49%	2/10188	MODERATE
c64bd252-b726-5e24-967e-4652fa18027a	chr16:g.16114968C>T	Single base substitution	synonymous_variant ABCC1 F1094F	2/412,0.49%	2/10188	LOW
c66c7c5b-4e87-5527-b849-5dbc06c72b2b	chr2:g.113075164G>A	Single base substitution	missense_variant IL1F10 E87K	2/412,0.49%	2/10188	MODERATE
c69084ff-51d9-5622-aa1e-8c1eb09b7eec	chr5:g.143300760C>T	Single base substitution	missense_variant NR3C1 R491Q	2/412,0.49%	2/10188	MODERATE
c6e846d1-7193-5f94-84fa-dc64f585d270	chr17:g.81294877G>C	Single base substitution	missense_variant SLC38A10 I15M	2/412,0.49%	2/10188	MODERATE
c7306f6b-34b1-5c22-913f-30b6ae9d9d1a	chr8:g.54625911C>T	Single base substitution	stop_gained RP1 R677*	2/412,0.49%	2/10188	HIGH
c752a1a8-9ea4-5945-955f-3b3f678eabf1	chr12:g.47078850G>A	Single base substitution	synonymous_variant AMIGO2 I51I	2/412,0.49%	2/10188	LOW
c773d8fd-2c7d-55c3-8de3-7f5163afe663	chr17:g.47680650_47680651insGCTCCT	Small insertion	stop_gained KPNB1 K871delinsSS*	2/412,0.49%	5/10188	HIGH
c78c9473-9466-55f9-afc2-72cfdd4fa06f	chr1:g.26767895G>T	Single base substitution	stop_gained ARID1A E1032*	2/412,0.49%	2/10188	HIGH
c7f5042b-3940-5723-b2f3-83acd77f9fe3	chr20:g.33611264C>G	Single base substitution	missense_variant CBFA2T2 L126V	2/412,0.49%	3/10188	MODERATE
c7f94fe0-f5cd-5afe-adcc-8da30dde3cce	chr1:g.36450255C>T	Single base substitution	splice_region_variant OSCP1 None	2/412,0.49%	2/10188	LOW
c80e7569-1825-52cb-9306-bc0c1059d93e	chr16:g.53687945C>G	Single base substitution	missense_variant RPGRIP1L D184H	2/412,0.49%	3/10188	MODERATE
c8543701-fe2a-5824-85b8-cdbe3e4183a5	chr16:g.27235211G>A	Single base substitution	synonymous_variant NSMCE1 V75V	2/412,0.49%	2/10188	LOW
c8c28a18-5ddd-5ffa-8e9b-7d7a097e0f33	chr1:g.15727448C>T	Single base substitution	missense_variant PLEKHM2 S459L	2/412,0.49%	2/10188	MODERATE
c8cd0453-7c7d-565d-a62a-3f390136bfb9	chr2:g.240891760G>A	Single base substitution	missense_variant C2orf54 S173L	2/412,0.49%	2/10188	MODERATE
c973e926-3f74-531c-8e37-0afb7e4fe5e4	chr15:g.40335358C>T	Single base substitution	missense_variant C15orf52 E469K	2/412,0.49%	2/10188	MODERATE
c9ba124f-258e-579f-8155-1881584ae755	chr19:g.17227099G>A	Single base substitution	missense_variant OCEL1 D118N	2/412,0.49%	2/10188	MODERATE
ca63acdf-9718-513b-8656-5923e31e17fc	chr2:g.32607522G>T	Single base substitution	missense_variant BIRC6 R4713L	2/412,0.49%	2/10188	MODERATE
ca7052f0-10db-51a3-8e13-e2373315d4e9	chr11:g.89491220G>A	Single base substitution	synonymous_variant NOX4 L9L	2/412,0.49%	2/10188	LOW
cae7d313-2706-571b-aba1-0633b45d1d25	chr8:g.143726121C>T	Single base substitution	missense_variant FAM83H E1114K	2/412,0.49%	2/10188	MODERATE
cb3eaa52-c046-5399-97ef-68f7bc6f4867	chr11:g.129376128C>G	Single base substitution	synonymous_variant BARX2 L31L	2/412,0.49%	2/10188	LOW
cb52d5c4-ed8e-57ec-95d9-9bf4e36ab6bb	chr17:g.29969314G>A	Single base substitution	missense_variant EFCAB5 M238I	2/412,0.49%	2/10188	MODERATE
cc32c8aa-a8eb-5554-a416-e1279ddf1ae2	chr12:g.53213535C>T	Single base substitution	missense_variant RARG E327K	2/412,0.49%	2/10188	MODERATE
cc354261-bf11-5b1d-a9f0-04fe5dc8d7d3	chrX:g.147213461C>G	Single base substitution	downstream_gene_variant MIR513A1 None	2/412,0.49%	2/10188	MODIFIER
cc39e73c-60f7-5d83-bcc4-54ef38b7bd3e	chr17:g.75266820C>G	Single base substitution	missense_variant MIF4GD E197Q	2/412,0.49%	2/10188	MODERATE
cc4101dc-a3fa-58f7-8229-aa5e40247030	chr5:g.168579295G>A	Single base substitution	5_prime_UTR_variant PANK3 None	2/412,0.49%	2/10188	MODIFIER
cc467164-3cb8-5e6b-8387-1e4ee6c0bffb	chr1:g.23193016A>T	Single base substitution	3_prime_UTR_variant HTR1D None	2/412,0.49%	10/10188	MODIFIER
cc59ccdc-e31a-5916-8741-c7fd694fde60	chr6:g.36684280_36684281insG	Small insertion	frameshift_variant CDKN1A D62*	2/412,0.49%	2/10188	HIGH
ccb30e98-e415-5037-a458-604ee449e20c	chr1:g.26779439_26779440insG	Small insertion	frameshift_variant ARID1A D1850Gfs*4	2/412,0.49%	10/10188	HIGH
cce72e44-0472-5d34-a64a-0892066cd719	chr1:g.1487900C>T	Single base substitution	missense_variant ATAD3B R418W	2/412,0.49%	3/10188	MODERATE
cd5baf24-26ac-5d18-9dbf-73fd24f1b1d6	chr4:g.1353258C>T	Single base substitution	missense_variant UVSSA S260F	2/412,0.49%	2/10188	MODERATE
cda40af6-971e-5944-883e-df9f8536b756	chr1:g.107324862T>C	Single base substitution	missense_variant NTNG1 V276A	2/412,0.49%	2/10188	MODERATE
ce12e896-cc05-5cc1-8e25-6afda390164b	chr19:g.19544025C>G	Single base substitution	missense_variant CILP2 L494V	2/412,0.49%	2/10188	MODERATE
ce1b4510-c42a-54e0-b366-93e11226a5f8	chr1:g.169387004G>C	Single base substitution	missense_variant BLZF1 R342T	2/412,0.49%	2/10188	MODERATE
ce24f80a-a174-5669-9941-331531b408bb	chr17:g.7674250C>A	Single base substitution	missense_variant TP53 C238F	2/412,0.49%	15/10188	MODERATE
ce40e777-6d7b-591c-aca2-dd58dc8b6f12	chr15:g.22559859C>T	Single base substitution	non_coding_transcript_exon_variant HERC2P2 None	2/412,0.49%	2/10188	MODIFIER
ce4d389c-39da-54ef-b776-5bd0a1c6f725	chr6:g.18159922G>C	Single base substitution	missense_variant KDM1B K9N	2/412,0.49%	2/10188	MODERATE
cef381c7-85a7-5b93-a3e8-9fb1db4b5c69	chr6:g.34856858C>T	Single base substitution	stop_gained UHRF1BP1 Q454*	2/412,0.49%	2/10188	HIGH
cf1ba0b8-6a1e-5706-b4b9-04d016c94204	chr17:g.44773278C>G	Single base substitution	synonymous_variant ADAM11 L281L	2/412,0.49%	2/10188	LOW
d05c4345-2931-5cc0-b0b2-f93376761997	chr19:g.7935130C>G	Single base substitution	missense_variant TIMM44 E110Q	2/412,0.49%	2/10188	MODERATE
d06563b7-c4f8-5552-98d8-0f092c0ba7f2	chr5:g.5239850C>T	Single base substitution	synonymous_variant ADAMTS16 F816F	2/412,0.49%	4/10188	LOW
d06cbe6c-4576-5c26-9454-cfdb1c2b7cc0	chr1:g.145876196G>C	Single base substitution	missense_variant ANKRD35 I168M	2/412,0.49%	2/10188	MODERATE
d0b990cc-7328-5975-b497-8bd178d21b39	chr16:g.67936229G>A	Single base substitution	synonymous_variant PSMB10 I76I	2/412,0.49%	2/10188	LOW
d0e324e5-9047-522c-8c8a-f989b987bf04	chr8:g.143728707C>G	Single base substitution	missense_variant FAM83H E252Q	2/412,0.49%	2/10188	MODERATE
d0ed9d01-87a4-5a1c-a864-ec06ca698ce7	chr6:g.44260069C>T	Single base substitution	missense_variant NFKBIE E471K	2/412,0.49%	2/10188	MODERATE
d1a6f6a1-e4de-5104-88ec-669ab13f062e	chr5:g.141152030C>T	Single base substitution	synonymous_variant PCDHB6 D591D	2/412,0.49%	2/10188	LOW
d1ca2523-c74a-588c-b5ad-166c7f2c8e82	chr19:g.48613159C>T	Single base substitution	missense_variant FAM83E E72K	2/412,0.49%	2/10188	MODERATE
d1cac4f5-537b-5e2b-9a24-6e5379051312	chr19:g.8938146G>C	Single base substitution	missense_variant MUC16 L10937V	2/412,0.49%	3/10188	MODERATE
d228b585-48f1-535b-94d4-68ae65ecbe69	chr10:g.34517033G>A	Single base substitution	stop_gained PARD3 Q117*	2/412,0.49%	3/10188	HIGH
d238ff3d-588a-5a04-99b0-b0715a3fe0a2	chr9:g.66990479C>G	Single base substitution	missense_variant SPATA31A3 E92Q	2/412,0.49%	11/10188	MODERATE
d25d8894-ab7d-5d53-add3-f1a7d4f8251c	chr7:g.74121042G>A	Single base substitution	missense_variant LIMK1 E592K	2/412,0.49%	2/10188	MODERATE
d2e78289-bf18-5e70-8109-071906813ad8	chr19:g.15678258C>G	Single base substitution	splice_region_variant CYP4F12 None	2/412,0.49%	2/10188	LOW
d3230cfb-7d23-54e3-a12e-aec0b792126b	chr12:g.109265119G>C	Single base substitution	missense_variant ACACB E2318Q	2/412,0.49%	2/10188	MODERATE
d32daada-77ed-540c-809d-230d22924e13	chr20:g.23876159G>A	Single base substitution	3_prime_UTR_variant CST5 None	2/412,0.49%	2/10188	MODIFIER
d338c1ef-078c-5b02-89da-a6d68034096e	chr1:g.23794633C>T	Single base substitution	intron_variant LYPLA2 None	2/412,0.49%	2/10188	MODIFIER
d398be1c-9694-5baf-b27f-2f28f741c595	chr3:g.143972678C>T	Single base substitution	missense_variant C3orf58 R116C	2/412,0.49%	2/10188	MODERATE
d3ff7679-d929-5f2a-a2fe-572fdd30cab1	chr19:g.58499192C>T	Single base substitution	missense_variant SLC27A5 E566K	2/412,0.49%	3/10188	MODERATE
d4587173-f164-53f0-86e5-ea7d15e16c37	chr22:g.31792772C>G	Single base substitution	stop_gained DEPDC5 S241*	2/412,0.49%	2/10188	HIGH
d4b4c848-c6b4-51ec-befe-a62a4bd14324	chr19:g.49972085C>T	Single base substitution	downstream_gene_variant VRK3 None	2/412,0.49%	2/10188	MODIFIER
d4ede3e1-f196-5914-a0ac-a7af45aac166	chr7:g.128731174C>T	Single base substitution	3_prime_UTR_variant FAM71F1 None	2/412,0.49%	2/10188	MODIFIER
d5883729-ad18-5bb4-b9f6-6ce421c8ee70	chr16:g.658562C>T	Single base substitution	missense_variant WDR90 T935M	2/412,0.49%	2/10188	MODERATE
d5dda758-1862-5ded-8110-704208fd1eba	chr1:g.155016229G>T	Single base substitution	missense_variant ZBTB7B K388N	2/412,0.49%	3/10188	MODERATE
d5f0f6d5-bcfe-5625-af8b-ecb0b0dddf28	chr5:g.160406593C>T	Single base substitution	missense_variant SLU7 E388K	2/412,0.49%	2/10188	MODERATE
d5f68c00-09be-54a9-9233-df8d6a7b26f3	chr19:g.45368734C>G	Single base substitution	missense_variant ERCC2 E86Q	2/412,0.49%	2/10188	MODERATE
d62325d5-ee2a-581f-803c-2dee37d05cc5	chr2:g.119967939G>A	Single base substitution	missense_variant PTPN4 M887I	2/412,0.49%	2/10188	MODERATE
d629272a-f87a-555c-ae9c-203c7cad6014	chr12:g.117225057C>T	Single base substitution	missense_variant NOS1 R1262Q	2/412,0.49%	3/10188	MODERATE
d6360ea7-6cf9-5018-9288-24067f76d459	chrX:g.45089742G>A	Single base substitution	splice_acceptor_variant KDM6A X1183_splice	2/412,0.49%	2/10188	HIGH
d64a4336-8d7d-5e34-9dc9-f2fe8537d17a	chr12:g.109067553G>A	Single base substitution	missense_variant USP30 E136K	2/412,0.49%	2/10188	MODERATE
d6966a2b-b8c0-5549-96e4-f7147f987276	chr10:g.62655393G>A	Single base substitution	intron_variant ZNF365 None	2/412,0.49%	2/10188	MODIFIER
d7423478-c736-55aa-bb1c-47a4e814ad7d	chr12:g.56088557G>T	Single base substitution	missense_variant ERBB3 D297Y	2/412,0.49%	6/10188	MODERATE
d767ebd6-e834-5c8d-a20d-8f3e4c826f10	chr13:g.48476728C>T	Single base substitution	stop_gained RB1 Q850*	2/412,0.49%	2/10188	HIGH
d7f022a0-bf8a-59be-a257-c854af88cd45	chr18:g.76379125G>C	Single base substitution	missense_variant ZNF516 L997V	2/412,0.49%	2/10188	MODERATE
d7f22a7a-9e6b-51c7-b77b-1b185befa1af	chr19:g.12670078G>C	Single base substitution	missense_variant WDR83 E69Q	2/412,0.49%	2/10188	MODERATE
d8087572-3aa8-51b3-96dc-11687955b602	chr11:g.108940385G>A	Single base substitution	missense_variant DDX10 E864K	2/412,0.49%	2/10188	MODERATE
d8315bc5-ece4-5100-9db8-8427b3a06afb	chr13:g.99501702G>A	Single base substitution	synonymous_variant TM9SF2 R32R	2/412,0.49%	3/10188	LOW
d84fed00-d31b-570e-940a-8a4bb2000739	chr19:g.18200356G>A	Single base substitution	synonymous_variant RAB3A N106N	2/412,0.49%	2/10188	LOW
d87ebba0-4322-5cbd-b4b9-336c342d7102	chr8:g.30846989C>T	Single base substitution	missense_variant TEX15 E677K	2/412,0.49%	2/10188	MODERATE
d886f055-1fe4-5ce5-b2d0-bb3e689860f0	chr19:g.1095361G>C	Single base substitution	upstream_gene_variant POLR2E None	2/412,0.49%	2/10188	MODIFIER
d8b26ef7-a8de-5e0f-a15e-bcd525a9d318	chr4:g.183510584G>A	Single base substitution	missense_variant ING2 E159K	2/412,0.49%	2/10188	MODERATE
d8db651b-5ab3-500f-afa2-36c9e133415e	chr19:g.38082496G>A	Single base substitution	missense_variant SIPA1L3 E311K	2/412,0.49%	3/10188	MODERATE
d9059d54-8035-5aab-b973-6417f70b22a1	chr1:g.182585840G>A	Single base substitution	missense_variant RNASEL H323Y	2/412,0.49%	2/10188	MODERATE
d90e2b3e-d856-52e4-868a-11bed224b0a7	chr1:g.26732773C>G	Single base substitution	stop_gained ARID1A S634*	2/412,0.49%	2/10188	HIGH
d90f6686-f3f3-53fd-9e78-bd8d643da180	chr12:g.119179562G>A	Single base substitution	missense_variant HSPB8 E84K	2/412,0.49%	6/10188	MODERATE
d92749f5-d902-5e32-b09d-084524da53e4	chr8:g.120203838C>G	Single base substitution	missense_variant COL14A1 S336C	2/412,0.49%	2/10188	MODERATE
d932cccf-6489-567b-a3b5-fd9dd4f4298d	chr17:g.17796971C>G	Single base substitution	synonymous_variant RAI1 L1341L	2/412,0.49%	2/10188	LOW
d93ecc61-d7a3-5023-b3a3-842f53db1821	chr12:g.130363053G>A	Single base substitution	missense_variant PIWIL1 D702N	2/412,0.49%	3/10188	MODERATE
d94de817-29a0-5dd1-b6b5-2db0ccd165e0	chr1:g.169727787C>G	Single base substitution	missense_variant SELE E474Q	2/412,0.49%	2/10188	MODERATE
d955d13e-277d-5599-a337-4220199d5ea1	chr17:g.79047827C>T	Single base substitution	synonymous_variant C1QTNF1 F195F	2/412,0.49%	2/10188	LOW
d986c6aa-ff3b-591b-985b-156ceb82b93a	chr10:g.95422005C>G	Single base substitution	missense_variant SORBS1 G133R	2/412,0.49%	2/10188	MODERATE
d9bde8dd-3946-5a89-ba6a-0fc990c9a74e	chr11:g.65503987G>C	Single base substitution	upstream_gene_variant MALAT1 None	2/412,0.49%	2/10188	MODIFIER
d9c5c9b2-789a-53fd-b037-f1af063246e7	chr1:g.3707604C>T	Single base substitution	missense_variant TP73 S81L	2/412,0.49%	2/10188	MODERATE
da0b4d71-2780-53ed-a5f6-a50c313365e9	chr6:g.36684167delC	Small deletion	frameshift_variant CDKN1A F22Lfs*9	2/412,0.49%	2/10188	HIGH
da4620cd-e49d-5c09-8c11-b2a13b1a3397	chr19:g.17365503G>A	Single base substitution	missense_variant PLVAP A321V	2/412,0.49%	3/10188	MODERATE
da69b79e-0ba9-55b3-8558-4b559eeef984	chr11:g.10534137G>C	Single base substitution	missense_variant RNF141 Q8E	2/412,0.49%	2/10188	MODERATE
da99cbb2-5d6e-55b9-b140-1b11416280ab	chr20:g.35147250G>A	Single base substitution	synonymous_variant EDEM2 F3F	2/412,0.49%	2/10188	LOW
db142df2-c710-5338-8b38-7679c69cd7d2	chr13:g.48373493G>A	Single base substitution	splice_donor_variant RB1 X405_splice	2/412,0.49%	6/10188	HIGH
db3942bb-340e-5e58-b78e-84ecb30d4dcf	chr6:g.133481500C>G	Single base substitution	missense_variant EYA4 I336M	2/412,0.49%	2/10188	MODERATE
db66004c-95ea-5e34-90c0-9452e27314ae	chr1:g.87340060C>T	Single base substitution	missense_variant LMO4 S116F	2/412,0.49%	2/10188	MODERATE
dbdf3081-cdad-5987-9d67-43cbd1a0a538	chr9:g.127264931G>A	Single base substitution	synonymous_variant GARNL3 L18L	2/412,0.49%	2/10188	LOW
dc59a81c-6ecf-55be-b436-ff61e5a47620	chr16:g.765688C>G	Single base substitution	splice_region_variant MSLN None	2/412,0.49%	2/10188	LOW
dc618944-e3c9-5825-95c7-376b0427098f	chr7:g.157568951C>G	Single base substitution	synonymous_variant PTPRN2 R951R	2/412,0.49%	2/10188	LOW
dca74bde-a8a5-5ea0-848b-11fa8a6c4acc	chr12:g.68764925G>A	Single base substitution	3_prime_UTR_variant SLC35E3 None	2/412,0.49%	2/10188	MODIFIER
dcf04b33-19ea-568f-9e56-16eb3d91b49b	chr1:g.38875839G>A	Single base substitution	missense_variant GJA9 S87L	2/412,0.49%	2/10188	MODERATE
dd2a29a5-e3a3-50e2-b73a-9faa9028096a	chr13:g.48473371C>A	Single base substitution	stop_gained RB1 S834*	2/412,0.49%	2/10188	HIGH
dd3023c3-de0c-5cf5-a3ee-27db2f3aa904	chr6:g.138785244G>A	Single base substitution	missense_variant CCDC28A E204K	2/412,0.49%	2/10188	MODERATE
dd48910d-20d3-5e61-8284-572a58b77d8d	chr1:g.19780722G>C	Single base substitution	missense_variant TMCO4 Q13E	2/412,0.49%	4/10188	MODERATE
dd53c9ca-9562-5ee4-9f13-770bd6a3b112	chr19:g.3819088C>T	Single base substitution	missense_variant ZFR2 E630K	2/412,0.49%	2/10188	MODERATE
dd66f212-ab28-568d-b35b-786e82a01b0d	chr17:g.81890691G>A	Single base substitution	stop_gained ALYREF Q130*	2/412,0.49%	2/10188	HIGH
dd76f7fa-d714-5b8a-b306-5d3f8920071a	chr3:g.52522394C>T	Single base substitution	missense_variant STAB1 S2177L	2/412,0.49%	3/10188	MODERATE
dd8afb4b-8902-5770-8fac-255816a74971	chr19:g.18573292G>A	Single base substitution	splice_acceptor_variant UBA52 None	2/412,0.49%	2/10188	HIGH
dd9a4d8d-8b05-52e2-b309-c56079909c97	chr4:g.173333593G>A	Single base substitution	synonymous_variant HMGB2 F19F	2/412,0.49%	2/10188	LOW
dda30f6c-d7ac-51c3-bb9d-6b2915f608ca	chr22:g.38520070C>T	Single base substitution	missense_variant DMC1 E325K	2/412,0.49%	2/10188	MODERATE
dda3a06e-13e5-5cbd-8dc4-0b4fcc94efb0	chr1:g.26771174C>G	Single base substitution	stop_gained ARID1A S1085*	2/412,0.49%	5/10188	HIGH
ddb6f34b-0c45-59db-9d4f-4b85e6e7b988	chr1:g.36091822G>A	Single base substitution	synonymous_variant ADPRHL2 Q171Q	2/412,0.49%	2/10188	LOW
de114861-66b3-5860-8600-2921ad667777	chr7:g.64979284G>A	Single base substitution	missense_variant ZNF117 S96L	2/412,0.49%	2/10188	MODERATE
decdb2e1-0409-5ceb-82eb-bc34aa14905d	chr3:g.138946507C>T	Single base substitution	synonymous_variant FOXL2 E72E	2/412,0.49%	2/10188	LOW
def582ee-0614-56af-93ad-0a4120f86b45	chr17:g.30840704G>A	Single base substitution	missense_variant ATAD5 E722K	2/412,0.49%	2/10188	MODERATE
df0be59d-a7a8-570c-a9a0-f4831747ae72	chr17:g.18016245G>A	Single base substitution	downstream_gene_variant ATPAF2 None	2/412,0.49%	2/10188	MODIFIER
df17cbf2-fafc-5447-8d84-72f9d1878246	chr3:g.57169229C>T	Single base substitution	upstream_gene_variant IL17RD None	2/412,0.49%	2/10188	MODIFIER
df301201-0e73-5ddf-b231-80f845a03910	chr9:g.132911500G>A	Single base substitution	stop_gained TSC1 Q328*	2/412,0.49%	2/10188	HIGH
df336bed-2ee1-543c-814a-ac0f4898919c	chr15:g.25073195G>A	Single base substitution	non_coding_transcript_exon_variant SNORD116-9 None	2/412,0.49%	2/10188	MODIFIER
df5e6bb7-028c-536b-86ab-7be211ed4573	chr22:g.50744104C>T	Single base substitution	synonymous_variant ACR L203L	2/412,0.49%	2/10188	LOW
df608af0-a63d-52aa-b72a-7931c2b701fd	chr1:g.65408680C>G	Single base substitution	missense_variant DNAJC6 S787C	2/412,0.49%	2/10188	MODERATE
dfa14795-3f24-5184-af6b-8bbae51c756c	chr12:g.56098839G>C	Single base substitution	missense_variant ERBB3 E925Q	2/412,0.49%	2/10188	MODERATE
dfbba9d5-9ce9-5569-bd20-cbe72abfae34	chrX:g.30855033C>G	Single base substitution	missense_variant TAB3 R211T	2/412,0.49%	2/10188	MODERATE
dfe76c1a-ba67-50ea-bef1-651b489d3954	chr10:g.126998095C>G	Single base substitution	missense_variant DOCK1 Q205E	2/412,0.49%	3/10188	MODERATE
dfe9f6a5-23c5-5c76-a2f8-77aec2a8c2d7	chr7:g.2938826C>T	Single base substitution	synonymous_variant CARD11 G290G	2/412,0.49%	2/10188	LOW
e0071b30-aaa3-5ac1-a368-3c68c4265059	chr6:g.43070689C>G	Single base substitution	splice_region_variant KLC4 None	2/412,0.49%	2/10188	LOW
e03476a0-b1ee-5d55-9d1a-412c94132798	chr9:g.132336344G>C	Single base substitution	missense_variant SETX L224V	2/412,0.49%	3/10188	MODERATE
e037287d-1b8f-50a0-9c70-4884af9743ed	chr5:g.157109087A>T	Single base substitution	5_prime_UTR_variant HAVCR2 None	2/412,0.49%	2/10188	MODIFIER
e0378e08-88de-5353-9df1-72c3b7b7a358	chr16:g.24220079C>G	Single base substitution	missense_variant PRKCB S661C	2/412,0.49%	2/10188	MODERATE
e04f4538-d804-5b83-83a3-e37f3c12f7e0	chr9:g.134436505C>A	Single base substitution	missense_variant RXRA S427Y	2/412,0.49%	3/10188	MODERATE
e080ae5f-215c-5db8-9d5d-8f9c9d3c1c76	chr1:g.52771593G>C	Single base substitution	missense_variant ZYG11B R257P	2/412,0.49%	2/10188	MODERATE
e0c9cd07-0871-56d2-a441-731fe80a09c0	chr17:g.7674193A>T	Single base substitution	missense_variant TP53 L257Q	2/412,0.49%	3/10188	MODERATE
e0e238a7-316a-547f-8359-6946d7a67844	chr9:g.21971200C>A	Single base substitution	missense_variant CDKN2A M53I	2/412,0.49%	2/10188	MODERATE
e0e87b31-e170-5dcd-aab0-353730ca013e	chr5:g.156954542C>T	Single base substitution	synonymous_variant TIMD4 P91P	2/412,0.49%	3/10188	LOW
e11093f4-6b6e-5f14-b914-15f36465b179	chr17:g.39471317G>C	Single base substitution	missense_variant CDK12 L495F	2/412,0.49%	2/10188	MODERATE
e1262bca-73d3-57e4-b97b-0a9ef9f8d2f8	chr7:g.149104346G>C	Single base substitution	missense_variant ZNF425 Q509E	2/412,0.49%	2/10188	MODERATE
e14d4491-ea50-54aa-9232-c3dbd561a5ce	chr9:g.91723874C>T	Single base substitution	missense_variant ROR2 V874I	2/412,0.49%	2/10188	MODERATE
e15527e6-545b-53bf-b4c2-b33d6db76679	chr22:g.37655596G>A	Single base substitution	missense_variant SH3BP1 G673E	2/412,0.49%	2/10188	MODERATE
e16962f7-1f4b-55e2-9a75-d2464faac295	chr1:g.213997021G>A	Single base substitution	synonymous_variant PROX1 L162L	2/412,0.49%	2/10188	LOW
e20a9cac-1ff0-5115-bb7e-66d12a7b165c	chr18:g.23928669C>T	Single base substitution	synonymous_variant LAMA3 F2780F	2/412,0.49%	2/10188	LOW
e214606f-796b-536c-9323-efc94a1f8113	chr16:g.77825265C>T	Single base substitution	missense_variant VAT1L A128V	2/412,0.49%	3/10188	MODERATE
e22a095a-8676-5d15-881b-d30086ea1ff9	chr11:g.76544793G>A	Single base substitution	missense_variant C11orf30 A1082T	2/412,0.49%	2/10188	MODERATE
e22e4b2b-5efe-5712-b75c-bebf442a78b6	chr2:g.218814633G>C	Single base substitution	missense_variant CYP27A1 R451T	2/412,0.49%	2/10188	MODERATE
e24ce162-6f8f-51c9-ab08-6addcb50212f	chr3:g.186652491G>A	Single base substitution	missense_variant FETUB E337K	2/412,0.49%	3/10188	MODERATE
e2aa6903-a94c-5515-b02c-3b4c24b64d26	chr9:g.125189784G>A	Single base substitution	5_prime_UTR_variant PPP6C None	2/412,0.49%	3/10188	MODIFIER
e2bd0bd4-e1af-5d66-b322-4deba785c54d	chr1:g.159873071C>T	Single base substitution	missense_variant CFAP45 E484K	2/412,0.49%	2/10188	MODERATE
e37c3a3d-9882-54f9-876c-9fddf2d9d60d	chr15:g.40815741G>A	Single base substitution	synonymous_variant PPP1R14D L131L	2/412,0.49%	2/10188	LOW
e400c975-252b-5878-bb0a-141f39cf64b3	chr10:g.114044880G>A	Single base substitution	missense_variant ADRB1 E250K	2/412,0.49%	2/10188	MODERATE
e41d7eee-1e22-5b70-a141-20f87810f0ff	chr12:g.55940959G>C	Single base substitution	missense_variant DGKA L360F	2/412,0.49%	2/10188	MODERATE
e4942c54-2ac4-58d3-8a21-abe636996c9f	chr9:g.136946097G>A	Single base substitution	missense_variant C8G R120Q	2/412,0.49%	4/10188	MODERATE
e49b7066-87e4-58cc-87de-220e5de17ceb	chr6:g.106105021G>A	Single base substitution	synonymous_variant PRDM1 G287G	2/412,0.49%	2/10188	LOW
e4b25568-49b6-54f8-9784-9689db950845	chr7:g.20659076G>A	Single base substitution	intron_variant ABCB5 None	2/412,0.49%	2/10188	MODIFIER
e4b8cb10-6544-50f5-8257-111b29caabdf	chr15:g.83107724C>G	Single base substitution	missense_variant TM6SF1 S15W	2/412,0.49%	2/10188	MODERATE
e4c2135b-9ff1-5c16-98d6-b28942fd5ed4	chr1:g.228245560C>G	Single base substitution	stop_gained OBSCN S1210*	2/412,0.49%	3/10188	HIGH
e4efdd4d-450f-5ad7-9806-742bfe1990a4	chr5:g.141393376G>C	Single base substitution	missense_variant PCDHGA8 G188A	2/412,0.49%	2/10188	MODERATE
e50ba3b8-2929-598d-a9d3-1d9bf5b8dbf4	chr17:g.7673803G>T	Single base substitution	missense_variant TP53 R273S	2/412,0.49%	7/10188	MODERATE
e5376dba-587b-5966-89aa-32c6092528f3	chr12:g.6944154G>A	Single base substitution	synonymous_variant C12orf57 L11L	2/412,0.49%	3/10188	LOW
e53eaabd-da1b-501b-9c07-aca81a7c9531	chrX:g.45010959A>T	Single base substitution	splice_acceptor_variant KDM6A X129_splice	2/412,0.49%	2/10188	HIGH
e6a9e9e0-9c21-5780-b999-19c2b74aebb6	chr7:g.151001310delG	Small deletion	frameshift_variant NOS3 G440Afs*64	2/412,0.49%	17/10188	HIGH
e7370f11-c017-5bd6-b8af-88f5bf874ac5	chr16:g.89722812G>A	Single base substitution	missense_variant ZNF276 G163S	2/412,0.49%	4/10188	MODERATE
e73f1112-1b79-5c0a-b278-edf6a6e1e5ed	chr14:g.49779755G>C	Single base substitution	missense_variant KLHDC2 R241T	2/412,0.49%	3/10188	MODERATE
e75310c1-a8aa-5959-8f16-2668924736d0	chr7:g.16465693G>A	Single base substitution	5_prime_UTR_variant SOSTDC1 None	2/412,0.49%	2/10188	MODIFIER
e76797ba-9546-5a71-a966-338a77a31e1e	chr20:g.34749480C>A	Single base substitution	missense_variant NCOA6 K905N	2/412,0.49%	2/10188	MODERATE
e77debeb-6cf5-5cdf-a7a3-89711841b881	chr2:g.135313567C>T	Single base substitution	missense_variant ZRANB3 M296I	2/412,0.49%	2/10188	MODERATE
e81e0290-412d-5fbb-bf45-457b583b92be	chr2:g.202941888G>A	Single base substitution	5_prime_UTR_variant CARF None	2/412,0.49%	2/10188	MODIFIER
e8825703-8ce6-5b42-b861-6da32daff933	chr5:g.95498589G>C	Single base substitution	missense_variant TTC37 S1115C	2/412,0.49%	2/10188	MODERATE
e8e07310-aaab-5d0c-9dc9-755de68b4b92	chr15:g.74132767C>T	Single base substitution	missense_variant ISLR2 R5W	2/412,0.49%	4/10188	MODERATE
e8e09737-c256-55d1-80e7-81d122184139	chr13:g.113208157C>T	Single base substitution	intron_variant PCID2 None	2/412,0.49%	2/10188	MODIFIER
e8f68600-b079-57c5-b906-a58c821ee8b6	chr17:g.76736088C>G	Single base substitution	intron_variant SRSF2 None	2/412,0.49%	2/10188	MODIFIER
e8fce995-780c-5c2c-af00-0e6c80b27e3f	chr11:g.108321338G>C	Single base substitution	missense_variant ATM E2164Q	2/412,0.49%	2/10188	MODERATE
e9018e72-54da-500f-a700-60cc74c6b755	chr17:g.37155727G>A	Single base substitution	synonymous_variant ACACA L1801L	2/412,0.49%	2/10188	LOW
e92377fd-d11c-57ae-9061-61bff5f37909	chr6:g.53652199G>A	Single base substitution	missense_variant KLHL31 S435L	2/412,0.49%	2/10188	MODERATE
e965c136-45b1-59d3-9375-618a85b14811	chr17:g.31320457G>C	Single base substitution	intron_variant EVI2A None	2/412,0.49%	2/10188	MODIFIER
e983c6d1-3171-5fdc-b62e-170d395edac7	chr6:g.73242532_73242533insTCATCA	Small insertion	splice_region_variant KHDC1 None	2/412,0.49%	2/10188	LOW
e9b3cc99-2f73-522a-b522-dcb3a8629216	chr11:g.1622049C>T	Single base substitution	synonymous_variant KRTAP5-4 G15G	2/412,0.49%	14/10188	LOW
e9f2798d-d688-5842-98e1-2aecc84aed1d	chr12:g.32708200delAG	Small deletion	frameshift_variant DNM1L E116Kfs*6	2/412,0.49%	3/10188	HIGH
ea01643d-bd8a-5002-92a9-8640ba62bd6d	chr1:g.145994323C>G	Single base substitution	missense_variant TXNIP E316Q	2/412,0.49%	2/10188	MODERATE
ea1961b2-a9fb-5652-b382-17ca2356b028	chr2:g.29070781C>T	Single base substitution	missense_variant C2orf71 E1161K	2/412,0.49%	4/10188	MODERATE
ea6624c4-1c72-55a0-a25f-478fdb2d0021	chr13:g.75537609C>T	Single base substitution	intron_variant COMMD6 None	2/412,0.49%	3/10188	MODIFIER
eaa206b9-5588-56c0-a678-c5a6589f3915	chr3:g.49360277C>T	Single base substitution	missense_variant RHOA E172K	2/412,0.49%	3/10188	MODERATE
eae26ecb-d900-58c8-bbd6-12c6bda95989	chr19:g.8858608C>G	Single base substitution	missense_variant MUC16 E14354Q	2/412,0.49%	2/10188	MODERATE
eb0227fb-aee8-527e-925a-6e23349c06df	chr1:g.31059311G>A	Single base substitution	stop_gained PUM1 Q86*	2/412,0.49%	2/10188	HIGH
eb77ec88-e1bb-542c-85d1-d9248b8115cc	chr5:g.172346241C>T	Single base substitution	synonymous_variant SH3PXD2B P361P	2/412,0.49%	2/10188	LOW
ebb95602-22de-5251-b85a-ac521226d019	chr9:g.71704606G>C	Single base substitution	synonymous_variant TMEM2 V1061V	2/412,0.49%	2/10188	LOW
ebbd704a-e7dc-5159-86e0-5a392e6dfc0e	chr9:g.121144899C>T	Single base substitution	synonymous_variant CNTRL L1036L	2/412,0.49%	2/10188	LOW
ebf671a9-d2ec-51b3-8280-9d87e1a6b601	chr16:g.88803891C>T	Single base substitution	synonymous_variant CDT1 I20I	2/412,0.49%	3/10188	LOW
ebf87750-a6b7-59b3-ad5c-76c428dd5001	chr10:g.125836710C>T	Single base substitution	missense_variant DHX32 E737K	2/412,0.49%	2/10188	MODERATE
ec60d3c0-ef65-5c9f-b49b-156751d6a5e1	chr9:g.127479482G>A	Single base substitution	missense_variant LRSAM1 E294K	2/412,0.49%	3/10188	MODERATE
ed425d0a-3152-570a-8171-5b248c27dedf	chr5:g.67163775G>A	Single base substitution	synonymous_variant MAST4 L1532L	2/412,0.49%	2/10188	LOW
ede297a5-d47d-5ef1-aa69-4f367161b539	chr12:g.113299876G>A	Single base substitution	synonymous_variant SLC8B1 L552L	2/412,0.49%	3/10188	LOW
ee702dcb-ede4-5f7f-85ff-424525704db5	chr2:g.186590491C>T	Single base substitution	synonymous_variant ITGAV F51F	2/412,0.49%	5/10188	LOW
eeb67585-ee98-51de-bad9-d1bafb2f738e	chr2:g.25756066C>T	Single base substitution	missense_variant ASXL2 E330K	2/412,0.49%	3/10188	MODERATE
eee6fc32-7bf5-55d9-8f3a-611ac385f7a8	chr3:g.142694497G>A	Single base substitution	synonymous_variant PLS1 R402R	2/412,0.49%	2/10188	LOW
ef210e60-c2e2-5e40-a3f0-8191ed9351b0	chr12:g.109852639G>C	Single base substitution	synonymous_variant GLTP L182L	2/412,0.49%	2/10188	LOW
ef637455-2f41-57c2-9e35-01a2a07bafce	chr11:g.76351805C>G	Single base substitution	missense_variant PRKRIR D449H	2/412,0.49%	2/10188	MODERATE
ef9a7f6c-4a90-5e56-bd6f-fff53ec257c7	chr19:g.39891863G>A	Single base substitution	synonymous_variant FCGBP F2260F	2/412,0.49%	3/10188	LOW
eff4521a-4dd5-5fa4-af61-d8870ba109b3	chr1:g.46189982C>T	Single base substitution	missense_variant POMGNT1 E553K	2/412,0.49%	2/10188	MODERATE
f00d0d21-cb35-5ef3-b152-9bae4a715f8a	chr1:g.202011956G>A	Single base substitution	splice_acceptor_variant ELF3 X55_splice	2/412,0.49%	2/10188	HIGH
f03cd4d5-4f12-5669-af44-faf73dd3b49c	chr13:g.73075764G>A	Single base substitution	missense_variant KLF5 D418N	2/412,0.49%	3/10188	MODERATE
f06f1034-3954-5c92-8741-acc6ba6251f2	chr1:g.33700645C>T	Single base substitution	missense_variant CSMD2 R1162H	2/412,0.49%	3/10188	MODERATE
f0b1683a-38b2-5a79-aa2e-1a7faa43ce1f	chr19:g.45071526G>A	Single base substitution	3_prime_UTR_variant ZNF296 None	2/412,0.49%	2/10188	MODIFIER
f1371a02-ef88-5b0e-aa32-a1af2dea51ec	chr7:g.73831689C>T	Single base substitution	missense_variant CLDN4 S163L	2/412,0.49%	3/10188	MODERATE
f1456fdb-8c44-5cb7-8dba-fedc8f60b0c4	chr5:g.1208819C>T	Single base substitution	synonymous_variant SLC6A19 I92I	2/412,0.49%	3/10188	LOW
f164639e-a9a5-5c5e-8786-592ead410a0b	chr2:g.233556958G>C	Single base substitution	missense_variant USP40 S148C	2/412,0.49%	2/10188	MODERATE
f17d8b5a-81a9-5dee-943f-f68f66af0b00	chr3:g.45035793G>A	Single base substitution	missense_variant CLEC3B E160K	2/412,0.49%	2/10188	MODERATE
f18d0fc6-9304-5dc6-90ce-e71c7db41f2c	chr2:g.102526307C>T	Single base substitution	stop_gained SLC9A4 Q667*	2/412,0.49%	2/10188	HIGH
f1c6f9a1-ae74-5cf9-b73a-959da4f90656	chr1:g.149886616G>C	Single base substitution	missense_variant HIST2H2BE P9A	2/412,0.49%	2/10188	MODERATE
f21416cc-36d3-5a67-aef6-b4e18d89ecda	chr1:g.10304038C>G	Single base substitution	intron_variant KIF1B None	2/412,0.49%	2/10188	MODIFIER
f25584d8-64f7-5f5b-b0cc-2618b523bca7	chr17:g.81914503C>T	Single base substitution	missense_variant SIRT7 E203K	2/412,0.49%	2/10188	MODERATE
f2589d5c-dfeb-57be-8df4-03e7d1f10362	chr3:g.47101474G>A	Single base substitution	stop_gained SETD2 Q1667*	2/412,0.49%	3/10188	HIGH
f330feb1-e74e-5ed5-8440-6ccd3ebca222	chr15:g.25340117C>T	Single base substitution	missense_variant UBE3A M825I	2/412,0.49%	2/10188	MODERATE
f34f5a85-72cc-5aaf-93e5-c64008ce4b00	chr10:g.73068933C>G	Single base substitution	missense_variant P4HA1 D126H	2/412,0.49%	2/10188	MODERATE
f371ee45-3762-5dda-a030-7ec5536655ac	chr12:g.1831283C>T	Single base substitution	missense_variant LRTM2 S139L	2/412,0.49%	4/10188	MODERATE
f37f216e-6c30-5d3f-982b-dc1cd2730ca9	chr5:g.7861160G>C	Single base substitution	missense_variant FASTKD3 Q625E	2/412,0.49%	2/10188	MODERATE
f37fd22c-bb4d-5887-a7b6-146d90bc8b3a	chr14:g.77027622C>T	Single base substitution	synonymous_variant IRF2BPL L57L	2/412,0.49%	2/10188	LOW
f45daa8c-99b6-51bc-816a-ef77f4380be0	chr15:g.42402791C>G	Single base substitution	splice_region_variant CAPN3 None	2/412,0.49%	2/10188	LOW
f48ca19a-e664-5048-aac9-7f9afefbc554	chr10:g.102424733G>A	Single base substitution	missense_variant CUEDC2 S45L	2/412,0.49%	7/10188	MODERATE
f4a12b30-1d41-5e8a-a4c4-335e802d2fb1	chr18:g.53339838G>A	Single base substitution	missense_variant DCC V764I	2/412,0.49%	2/10188	MODERATE
f4c535d4-de75-58f0-8618-a2c101341561	chr8:g.143869315C>G	Single base substitution	synonymous_variant EPPK1 L1313L	2/412,0.49%	2/10188	LOW
f572c2f3-7507-5420-a691-461e53618b83	chr17:g.8173550C>T	Single base substitution	downstream_gene_variant TMEM107 None	2/412,0.49%	2/10188	MODIFIER
f574b4d4-af99-5a97-9766-162dc9e6dda4	chr4:g.102802573G>C	Single base substitution	missense_variant UBE2D3 F62L	2/412,0.49%	2/10188	MODERATE
f5915e2d-52c8-522c-8607-8cac3a69f7e1	chr20:g.3121389G>A	Single base substitution	missense_variant UBOX5 S417L	2/412,0.49%	2/10188	MODERATE
f5a9d82c-d8a0-533e-b82a-94aac24476fb	chr19:g.14564946C>T	Single base substitution	splice_region_variant TECR None	2/412,0.49%	2/10188	LOW
f5f62610-ebd6-55cd-9d24-4fd147164f76	chr17:g.44960269G>C	Single base substitution	missense_variant C1QL1 I232M	2/412,0.49%	2/10188	MODERATE
f6141ba1-4a64-557d-9eef-1ef9d8463fae	chr2:g.86442117G>A	Single base substitution	missense_variant KDM3A D24N	2/412,0.49%	3/10188	MODERATE
f6167649-336d-5d95-bf56-b2da36dc3364	chr3:g.127639370G>A	Single base substitution	missense_variant PODXL2 E66K	2/412,0.49%	2/10188	MODERATE
f6179b2a-7d1d-5d16-ac48-92f412f6092a	chrX:g.124045347C>T	Single base substitution	stop_gained STAG2 R216*	2/412,0.49%	4/10188	HIGH
f65ea058-7baa-509f-b680-f342049ecc5c	chr6:g.46689629G>C	Single base substitution	missense_variant TDRD6 E501Q	2/412,0.49%	2/10188	MODERATE
f662ec41-8e25-53d9-a2ad-66d51cacea19	chr11:g.65501413G>A	Single base substitution	downstream_gene_variant MALAT1 None	2/412,0.49%	2/10188	MODIFIER
f6696c7c-f93a-5dee-b09d-98e4c23d6361	chr4:g.154269969G>A	Single base substitution	stop_gained DCHS2 Q1715*	2/412,0.49%	2/10188	HIGH
f686a0df-5f67-5bcb-9a10-3f6b5c9943e0	chr1:g.15060234G>A	Single base substitution	missense_variant KAZN E327K	2/412,0.49%	3/10188	MODERATE
f6b51f9c-42ce-50ac-8f5d-1fb63d44db8c	chr7:g.100097632G>A	Single base substitution	stop_gained MCM7 R367*	2/412,0.49%	3/10188	HIGH
f7259c61-70f0-51c2-908c-81a2147fdbdd	chr14:g.19876507G>C	Single base substitution	missense_variant OR4K2 K80N	2/412,0.49%	2/10188	MODERATE
f725c6c9-d270-5ea0-b21e-466b2ef86ca7	chr20:g.5100905C>T	Single base substitution	synonymous_variant TMEM230 L83L	2/412,0.49%	2/10188	LOW
f743793d-4b58-5b3e-8311-7400a87b59b8	chr3:g.64568420C>T	Single base substitution	missense_variant ADAMTS9 R1491K	2/412,0.49%	3/10188	MODERATE
f7479bf3-6f3d-55e6-9915-2f63eedee7f5	chr2:g.169083438C>T	Single base substitution	synonymous_variant DHRS9 L141L	2/412,0.49%	2/10188	LOW
f750c20a-9786-53d3-921f-85a97b0f7b84	chr6:g.7584918C>T	Single base substitution	synonymous_variant DSP L2552L	2/412,0.49%	2/10188	LOW
f76d6b92-0a5d-5571-a060-962ca1ec866c	chr7:g.6692627G>A	Single base substitution	synonymous_variant ZNF12 F105F	2/412,0.49%	2/10188	LOW
f7913a0d-2541-5972-a725-5b4b2f6a43ce	chr14:g.34713372C>G	Single base substitution	missense_variant CFL2 E65Q	2/412,0.49%	2/10188	MODERATE
f7c0d4b6-cc7e-5ff1-aae2-ced21a92b1f4	chr6:g.40432690C>T	Single base substitution	missense_variant LRFN2 E142K	2/412,0.49%	2/10188	MODERATE
f8007b57-d32f-5b63-b06e-97cd7becbd09	chr9:g.128984912G>A	Single base substitution	missense_variant NUP188 M658I	2/412,0.49%	3/10188	MODERATE
f823dc20-7c6d-5349-b530-d8236d788abb	chr1:g.155320675C>G	Single base substitution	upstream_gene_variant RUSC1 None	2/412,0.49%	2/10188	MODIFIER
f82800c4-dfb2-5b31-b46b-8d0567a6c33f	chr1:g.3402925G>C	Single base substitution	missense_variant PRDM16 E271Q	2/412,0.49%	2/10188	MODERATE
f83ab661-c806-5d5e-bd96-418e2466906b	chr7:g.98931414G>A	Single base substitution	missense_variant TRRAP G1201R	2/412,0.49%	2/10188	MODERATE
f851e6c9-ed7e-50e3-9826-911c93d7d061	chr2:g.43225059C>T	Single base substitution	missense_variant ZFP36L2 E249K	2/412,0.49%	2/10188	MODERATE
f8799d94-8d2d-5fb9-983f-94cddea42cc1	chr1:g.226367590C>T	Single base substitution	missense_variant PARP1 D766N	2/412,0.49%	2/10188	MODERATE
f8d0a16e-9e17-5c7e-b9d3-a2039870c00a	chr4:g.9368765C>A	Single base substitution	downstream_gene_variant USP17L15 None	2/412,0.49%	7/10188	MODIFIER
f8e19376-7b97-522e-9b40-e65e4769128a	chr22:g.21925644C>T	Single base substitution	missense_variant PPM1F E304K	2/412,0.49%	2/10188	MODERATE
f8f37962-7078-52d9-871e-398dfc49e8a1	chr6:g.56618540C>G	Single base substitution	intron_variant DST None	2/412,0.49%	2/10188	MODIFIER
f90273ca-c84d-53ab-861f-3c12e3a80159	chr2:g.26483632C>T	Single base substitution	missense_variant OTOF E408K	2/412,0.49%	2/10188	MODERATE
f93b7245-590a-5eee-b240-9f646346566a	chr22:g.29561509G>C	Single base substitution	synonymous_variant NIPSNAP1 L192L	2/412,0.49%	2/10188	LOW
f9410510-54e1-5552-bc68-f2d3d772c55a	chr11:g.28077109C>T	Single base substitution	synonymous_variant KIF18A L441L	2/412,0.49%	2/10188	LOW
f9567f14-0843-5c5a-9850-8ef0e7421cd2	chr15:g.43330246G>A	Single base substitution	missense_variant LCMT2 R82C	2/412,0.49%	4/10188	MODERATE
f9af4736-ab88-5a01-927e-b522826c209a	chr3:g.121698122C>T	Single base substitution	missense_variant GOLGB1 E796K	2/412,0.49%	2/10188	MODERATE
f9daac28-e35c-54f2-a3f7-3540b4a47590	chr11:g.85734006G>C	Single base substitution	missense_variant SYTL2 I440M	2/412,0.49%	2/10188	MODERATE
fa30e359-f2b8-553a-8384-9d975dc2656e	chr9:g.91724028G>A	Single base substitution	synonymous_variant ROR2 N822N	2/412,0.49%	2/10188	LOW
fa4e4146-96fc-57e0-b3fc-b1afdbf84056	chr16:g.9763418G>A	Single base substitution	missense_variant GRIN2A R1376C	2/412,0.49%	3/10188	MODERATE
fa92a56b-ee93-5254-ad75-617a4a0a82bc	chr19:g.2514988G>A	Single base substitution	3_prime_UTR_variant GNG7 None	2/412,0.49%	20/10188	MODIFIER
fa964293-0cfa-56a4-aeef-ae355f5b7da8	chr11:g.68715857C>T	Single base substitution	missense_variant MTL5 E334K	2/412,0.49%	2/10188	MODERATE
fafaed1a-ce7b-5862-aa8c-285ea9690fad	chr18:g.9134254G>C	Single base substitution	missense_variant NDUFV2 G242A	2/412,0.49%	2/10188	MODERATE
fb190a44-2c8b-5692-884f-c4576eba49dd	chr1:g.38045681C>T	Single base substitution	missense_variant POU3F1 E355K	2/412,0.49%	2/10188	MODERATE
fb6601e3-b772-57f6-a686-cf30535b9485	chr9:g.127787600G>A	Single base substitution	missense_variant CDK9 R86Q	2/412,0.49%	3/10188	MODERATE
fb89d94b-63c5-5a49-b20c-926f4c9e56d8	chr19:g.16417970G>A	Single base substitution	missense_variant EPS15L1 S362L	2/412,0.49%	2/10188	MODERATE
fbb45ae9-d035-5349-b1f8-8d007db9ac87	chr17:g.35442057G>C	Single base substitution	synonymous_variant SLFN13 L476L	2/412,0.49%	3/10188	LOW
fbbc5c21-b6fd-5ef6-9fc1-27ecada1eb58	chr8:g.100258633C>T	Single base substitution	missense_variant RNF19A D814N	2/412,0.49%	3/10188	MODERATE
fbd36531-bc24-58fd-a761-1b8d04d84746	chr1:g.3815450C>T	Single base substitution	synonymous_variant CEP104 P910P	2/412,0.49%	3/10188	LOW
fbdb2352-0003-543f-83cb-e1b34af5c3c7	chr14:g.105841112C>T	Single base substitution	synonymous_variant IGHD L197L	2/412,0.49%	2/10188	LOW
fc0eaabf-456f-589a-b9a6-d8768a3bdea0	chr14:g.102944255C>A	Single base substitution	synonymous_variant CDC42BPB V1348V	2/412,0.49%	2/10188	LOW
fc2a9fe8-cae4-532e-96c0-c33d9b33d27b	chr17:g.17794441C>G	Single base substitution	stop_gained RAI1 S498*	2/412,0.49%	2/10188	HIGH
fc914276-069f-5aeb-9ff4-8c5e159753ed	chr1:g.147624474C>T	Single base substitution	missense_variant BCL9 P1266S	2/412,0.49%	2/10188	MODERATE
fca0dafb-febe-543d-b3cd-7083a85f7c83	chr19:g.54576051C>G	Single base substitution	synonymous_variant LILRA2 L399L	2/412,0.49%	2/10188	LOW
fccfdda9-55d7-51ea-a874-b138f1f7b175	chr3:g.127575229G>A	Single base substitution	synonymous_variant TPRA1 F270F	2/412,0.49%	2/10188	LOW
fd747c5c-3915-5900-a971-2c0025baf366	chr17:g.39724004C>G	Single base substitution	missense_variant ERBB2 I767M	2/412,0.49%	4/10188	MODERATE
fd8599e0-3993-50bd-8faf-a747bb3f43d1	chr19:g.46230464G>A	Single base substitution	synonymous_variant IGFL1 L90L	2/412,0.49%	2/10188	LOW
fdae232d-a19f-59b5-b6ed-b087a7c2363b	chr1:g.237456614C>T	Single base substitution	synonymous_variant RYR2 L497L	2/412,0.49%	2/10188	LOW
fde652b4-5daa-5cf7-96a0-041683a369ce	chr15:g.76935675G>C	Single base substitution	missense_variant RCN2 D134H	2/412,0.49%	2/10188	MODERATE
fe046d16-1df6-5c9c-923c-fd6cac815106	chr17:g.7675994C>A	Single base substitution	splice_region_variant TP53 T125T	2/412,0.49%	29/10188	LOW
fe04a254-3887-5db5-a4e5-46650618672d	chr7:g.91265495C>T	Single base substitution	synonymous_variant FZD1 F205F	2/412,0.49%	2/10188	LOW
fe2e6ea5-af2c-59b8-a6a3-6718282928af	chr10:g.35553173C>T	Single base substitution	missense_variant CCNY T245M	2/412,0.49%	2/10188	MODERATE
fe7f559f-9446-5ca5-9849-786396d3073e	chr13:g.87675940C>G	Single base substitution	synonymous_variant SLITRK5 L184L	2/412,0.49%	2/10188	LOW
fea75e81-63bd-5f34-b117-4efc7a27e0d9	chr9:g.137175105G>A	Single base substitution	missense_variant ANAPC2 S769L	2/412,0.49%	2/10188	MODERATE
ff12999c-6a53-54dc-9a87-764f76e0ad38	chr19:g.45407109C>T	Single base substitution	missense_variant CD3EAP S13F	2/412,0.49%	2/10188	MODERATE
ff198895-1fda-5c1e-a5cc-5f4937d8ab88	chr2:g.202287678G>T	Single base substitution	missense_variant NOP58 L151F	2/412,0.49%	2/10188	MODERATE
ff3bfd40-6270-5fc4-ac87-334633284808	chr3:g.41224610C>T	Single base substitution	missense_variant CTNNB1 S33F	2/412,0.49%	14/10188	MODERATE
ff3f0388-908c-5edf-ba13-81a6d02d7e36	chr13:g.77233222C>G	Single base substitution	missense_variant MYCBP2 E853Q	2/412,0.49%	2/10188	MODERATE
ff596898-16f8-5111-8723-b1af92fe2b7b	chrX:g.2740796G>C	Single base substitution	missense_variant CD99 E184Q	2/412,0.49%	2/10188	MODERATE
fff56651-afea-5d86-be9f-bbfc06160676	chr19:g.45671289C>T	Single base substitution	synonymous_variant GIPR L59L	2/412,0.49%	3/10188	LOW
000040f2-388b-50d5-93c5-abf09a352148	chr12:g.14481041C>T	Single base substitution	stop_gained ATF7IP Q1046*	1/412,0.24%	1/10188	HIGH
0000503c-4bfd-5daa-bf8a-c27136d491b1	chr11:g.17392915G>C	Single base substitution	3_prime_UTR_variant ABCC8 None	1/412,0.24%	1/10188	MODIFIER
00006ccc-121a-54e4-83bc-819b11e7170a	chr16:g.57659593C>G	Single base substitution	synonymous_variant ADGRG1 L495L	1/412,0.24%	1/10188	LOW
000093d1-9037-559e-9ce4-33d342ede707	chr7:g.134661917delACA	Small deletion	inframe_deletion BPGM N138del	1/412,0.24%	1/10188	MODERATE
00009afe-8119-524f-bb38-13c4ac9c1291	chr17:g.58006526C>G	Single base substitution	missense_variant SRSF1 D66H	1/412,0.24%	1/10188	MODERATE
00010374-b1ca-574d-8ea0-5d83f5a67e27	chr4:g.150249678C>T	Single base substitution	synonymous_variant DCLK2 V689V	1/412,0.24%	1/10188	LOW
00010709-f399-5595-894c-5335ce5276fd	chr1:g.39455040T>G	Single base substitution	missense_variant MACF1 D6905E	1/412,0.24%	1/10188	MODERATE
00013782-4008-5753-b103-c17c3f0efc7c	chr11:g.65111641C>A	Single base substitution	3_prime_UTR_variant VPS51 None	1/412,0.24%	1/10188	MODIFIER
0001dc0d-ff53-513a-8d91-9887df447285	chr14:g.39175330G>C	Single base substitution	missense_variant PNN E17D	1/412,0.24%	1/10188	MODERATE
0002acf3-e331-50a5-b3ac-40bdea01bbec	chr4:g.73998058G>C	Single base substitution	missense_variant CXCL5 P94A	1/412,0.24%	1/10188	MODERATE
0003e42a-264e-5e50-be87-2fa3d0d41d64	chr17:g.82035921G>T	Single base substitution	3_prime_UTR_variant DCXR None	1/412,0.24%	1/10188	MODIFIER
0003f48e-b6de-5143-b064-d46f1b1ea845	chr2:g.86489369A>G	Single base substitution	missense_variant KDM3A D1122G	1/412,0.24%	1/10188	MODERATE
0004a23f-475c-5adc-95f7-67db132b0da6	chr7:g.152002746G>A	Single base substitution	missense_variant GALNTL5 E231K	1/412,0.24%	1/10188	MODERATE
0005fc53-3c91-5f57-8740-0ad6d6cbefbd	chr5:g.7835466A>G	Single base substitution	synonymous_variant C5orf49 F60F	1/412,0.24%	1/10188	LOW
0005ff63-f7f9-54c3-83fe-a19d412782ba	chr2:g.74369095G>A	Single base substitution	splice_region_variant DCTN1 None	1/412,0.24%	1/10188	LOW
00079638-ff17-56dc-b846-064bdee9d663	chr7:g.103322782C>T	Single base substitution	synonymous_variant DNAJC2 R244R	1/412,0.24%	1/10188	LOW
0008cfc9-804d-5341-b314-2338eb987e97	chr18:g.21741697C>G	Single base substitution	synonymous_variant MIB1 T38T	1/412,0.24%	1/10188	LOW
000916b0-6523-5acd-885e-c06eb8082115	chr1:g.161626220C>T	Single base substitution	missense_variant FCGR3B G168S	1/412,0.24%	1/10188	MODERATE
00093021-d99a-53d8-a96d-149de92f2d35	chr5:g.140830374G>A	Single base substitution	synonymous_variant PCDHA6 G761G	1/412,0.24%	1/10188	LOW
00096b87-20cf-5f10-b950-ac4b6137b2f2	chr17:g.4938041C>T	Single base substitution	synonymous_variant SLC25A11 P257P	1/412,0.24%	1/10188	LOW
0009e33b-0afb-52f3-8b3b-8b44258333a4	chr9:g.137192086C>T	Single base substitution	3_prime_UTR_variant TPRN None	1/412,0.24%	1/10188	MODIFIER
000aadc2-d1d2-535e-aba9-3dc60247399a	chr2:g.108907946C>T	Single base substitution	missense_variant EDAR D293N	1/412,0.24%	1/10188	MODERATE
000b06cf-d923-5572-8384-74a01077dd20	chr10:g.35607884G>A	Single base substitution	missense_variant GJD4 C124Y	1/412,0.24%	1/10188	MODERATE
000b7c95-6056-55a6-96a7-52d96e5d75a9	chr12:g.4599731G>T	Single base substitution	missense_variant DYRK4 G242C	1/412,0.24%	1/10188	MODERATE
000b7dcb-ce91-59c1-b424-9936436d8867	chr13:g.52029107_52029108insCAAGGGGTA	Small insertion	inframe_insertion UTP14C T101_V102insQGV	1/412,0.24%	1/10188	MODERATE
000bb9a8-e58a-59bd-b3f1-dcf2b98fe003	chr19:g.17835149C>G	Single base substitution	missense_variant JAK3 D661H	1/412,0.24%	1/10188	MODERATE
000bd0ac-0fdc-5f7e-95c8-015d68eb45e4	chr7:g.100855719C>A	Single base substitution	synonymous_variant SLC12A9 R110R	1/412,0.24%	1/10188	LOW
000c2bdd-ed33-550d-a2d8-d36bb4fba8ec	chr16:g.70809903C>T	Single base substitution	synonymous_variant HYDIN L4921L	1/412,0.24%	1/10188	LOW
000c2efd-38ee-52dc-bb82-cb09b45e422d	chr11:g.109423849C>T	Single base substitution	synonymous_variant C11orf87 F72F	1/412,0.24%	1/10188	LOW
000c51a0-e667-5b36-b619-a581a0fb79f8	chr11:g.125429041G>T	Single base substitution	missense_variant PKNOX2 R322S	1/412,0.24%	1/10188	MODERATE
000ec1f7-709c-5f79-bfad-11e0b587c46b	chr3:g.48604655C>T	Single base substitution	synonymous_variant UQCRC1 P141P	1/412,0.24%	1/10188	LOW
000f4392-f717-5517-ad70-41e281cbed86	chr15:g.31501712C>G	Single base substitution	missense_variant OTUD7A Q376H	1/412,0.24%	1/10188	MODERATE
0011a898-8e28-5350-91d1-ffb91bd40f8c	chr1:g.26760973C>A	Single base substitution	missense_variant ARID1A P680T	1/412,0.24%	1/10188	MODERATE
0011e62f-4a00-59ca-97b7-9a0909e644a7	chr4:g.86107472C>T	Single base substitution	intron_variant MAPK10 None	1/412,0.24%	1/10188	MODIFIER
0011f629-c676-5cdd-b96d-7e64bf91a421	chr18:g.51067149G>A	Single base substitution	missense_variant SMAD4 D424N	1/412,0.24%	1/10188	MODERATE
0012c2ac-57e8-5b08-ba0e-456ecbcd3a40	chr11:g.62825326G>C	Single base substitution	missense_variant STX5 S185C	1/412,0.24%	1/10188	MODERATE
0013749e-3b23-5012-87e9-e41c75541777	chr22:g.43425048C>T	Single base substitution	synonymous_variant MPPED1 C21C	1/412,0.24%	1/10188	LOW
0013e89e-3a64-5c44-abb6-ee6c1c269ea5	chr1:g.26794796C>T	Single base substitution	synonymous_variant PIGV L254L	1/412,0.24%	1/10188	LOW
0015c5a6-9d9f-524f-ab6f-0ed44678cfb8	chr12:g.57613716G>C	Single base substitution	missense_variant ARHGEF25 E170Q	1/412,0.24%	1/10188	MODERATE
001694c4-3bb6-5a0e-ae5a-998791dfe2f6	chrX:g.47223693G>A	Single base substitution	missense_variant CDK16 E46K	1/412,0.24%	1/10188	MODERATE
0016a3ae-d7db-54ec-93bf-65e1284ada56	chr5:g.111092305G>T	Single base substitution	missense_variant WDR36 G6V	1/412,0.24%	1/10188	MODERATE
0016a3c0-ff15-5c34-b4f6-ec3b9b8f420a	chr9:g.130893528G>A	Single base substitution	missense_variant QRFP A104V	1/412,0.24%	1/10188	MODERATE
0016b999-5efc-515a-98b7-2644f91386e8	chr7:g.124764528T>C	Single base substitution	missense_variant GPR37 E150G	1/412,0.24%	1/10188	MODERATE
0016f99d-4c97-5e8e-8509-45f6a4c358a8	chr12:g.21906163A>G	Single base substitution	synonymous_variant ABCC9 S527S	1/412,0.24%	1/10188	LOW
00172daf-11c4-5d36-8025-5348e9179885	chr1:g.241885424G>A	Single base substitution	synonymous_variant EXO1 Q774Q	1/412,0.24%	1/10188	LOW
001780b0-f44c-5673-b643-a5f7be124a24	chr5:g.109355965G>C	Single base substitution	missense_variant PJA2 Q572E	1/412,0.24%	1/10188	MODERATE
0018459a-4b24-5e66-8620-ca1a9fb86702	chr6:g.44377140C>T	Single base substitution	3_prime_UTR_variant SPATS1 None	1/412,0.24%	1/10188	MODIFIER
00188a61-6a00-50c2-bb2c-f8273484aede	chr10:g.112430827C>T	Single base substitution	missense_variant ZDHHC6 E407K	1/412,0.24%	2/10188	MODERATE
0018969b-7f9d-58c1-98d3-01e6f3df5985	chr17:g.5183795T>G	Single base substitution	synonymous_variant ZNF594 P154P	1/412,0.24%	1/10188	LOW
0018a600-b7ae-5115-9324-9496c0368a6e	chr14:g.23415231T>C	Single base substitution	missense_variant MYH7 T1775A	1/412,0.24%	1/10188	MODERATE
0018c0c4-f269-5021-8892-c4bcca0d47f1	chr19:g.35723255A>T	Single base substitution	missense_variant KMT2B T995S	1/412,0.24%	1/10188	MODERATE
00196b52-05dd-57b6-ab81-cd5e66e6ba19	chr11:g.111723721C>G	Single base substitution	synonymous_variant SIK2 L791L	1/412,0.24%	1/10188	LOW
0019b0cb-441f-5366-a69a-02a4e8b885a5	chr4:g.113365184T>G	Single base substitution	splice_donor_variant ANK2 X3678_splice	1/412,0.24%	1/10188	HIGH
0019ceea-0767-5418-88c4-d05f087d7cac	chr11:g.89047408G>T	Single base substitution	synonymous_variant GRM5 A155A	1/412,0.24%	1/10188	LOW
001abdad-7cf9-5747-bf13-dfd26cbf0405	chr1:g.156583338G>A	Single base substitution	missense_variant TTC24 G347E	1/412,0.24%	1/10188	MODERATE
001b1f9b-f610-5b34-a684-f26c9cf036f6	chr5:g.177135541C>T	Single base substitution	synonymous_variant NSD1 I146I	1/412,0.24%	1/10188	LOW
001b3ac1-65b4-5f3d-b8ac-d86f6c510e81	chr17:g.35174337C>G	Single base substitution	missense_variant UNC45B I644M	1/412,0.24%	1/10188	MODERATE
001b50d7-3760-5cd7-9484-a564b864509d	chr1:g.179393999A>T	Single base substitution	missense_variant AXDND1 L320F	1/412,0.24%	1/10188	MODERATE
001b63de-0255-5789-a482-51d1fa54b587	chr17:g.48059572C>T	Single base substitution	synonymous_variant NFE2L1 L750L	1/412,0.24%	2/10188	LOW
001bf2d3-b4e7-5a20-ad9d-ca3be24b190c	chr15:g.23644800G>C	Single base substitution	synonymous_variant MAGEL2 L981L	1/412,0.24%	1/10188	LOW
001d1c43-da1e-5481-b63f-ee2ba40c1179	chr1:g.88983807G>C	Single base substitution	missense_variant RBMXL1 P7R	1/412,0.24%	1/10188	MODERATE
001d9b79-6ed1-5b4c-8460-63fdab01190c	chr3:g.15434454C>T	Single base substitution	missense_variant EAF1 P148S	1/412,0.24%	1/10188	MODERATE
001ebea4-a9e3-57d1-bbad-c6bd6dda21f1	chr18:g.7038845C>T	Single base substitution	missense_variant LAMA1 D510N	1/412,0.24%	1/10188	MODERATE
001ed536-fc46-5631-a8d5-5e70bf2ff800	chr8:g.98706563T>A	Single base substitution	synonymous_variant STK3 I196I	1/412,0.24%	1/10188	LOW
001f56e1-f5ba-5bd9-a7d7-0d8479d9f7ea	chr2:g.215384123G>A	Single base substitution	synonymous_variant FN1 S1506S	1/412,0.24%	2/10188	LOW
00201755-3f9b-5095-b63f-a63ff711ba56	chr14:g.92797954G>T	Single base substitution	stop_gained GOLGA5 E173*	1/412,0.24%	1/10188	HIGH
002022b6-84fa-5991-b34c-25756e95dbba	chr12:g.52768863A>T	Single base substitution	synonymous_variant KRT76 G589G	1/412,0.24%	1/10188	LOW
002049e2-a624-544a-b51d-4603de49405a	chr19:g.50661988G>A	Single base substitution	missense_variant SHANK1 L2155F	1/412,0.24%	1/10188	MODERATE
0020535b-ccd4-50d0-9b52-0d4e15540b3c	chr3:g.153502583A>C	Single base substitution	non_coding_transcript_exon_variant C3orf79 None	1/412,0.24%	1/10188	MODIFIER
002063e3-5d5d-591f-ace7-ca58b6a136c8	chr16:g.9764111C>T	Single base substitution	missense_variant GRIN2A V1145M	1/412,0.24%	1/10188	MODERATE
00209a21-ae17-5b81-9f5f-7f2a19e42de4	chr17:g.30462467C>G	Single base substitution	stop_gained CPD S1305*	1/412,0.24%	1/10188	HIGH
002184e2-3e56-5fe7-99a5-8f7cd7fbc7d5	chr6:g.44265536C>T	Single base substitution	stop_gained NFKBIE W76*	1/412,0.24%	1/10188	HIGH
0021c60e-a918-5b33-95dd-19be31e03753	chr22:g.43046523G>C	Single base substitution	synonymous_variant TTLL1 L343L	1/412,0.24%	1/10188	LOW
00227c20-f4f0-547c-807a-32ec798e6547	chr14:g.68789994C>T	Single base substitution	missense_variant ZFP36L1 A186T	1/412,0.24%	1/10188	MODERATE
0022994b-8363-51eb-a436-cc09efbb190f	chr16:g.67831248C>T	Single base substitution	missense_variant CENPT R224Q	1/412,0.24%	1/10188	MODERATE
00238cbb-0cf4-5158-9f8c-11815c49aa25	chr9:g.81685709C>A	Single base substitution	missense_variant TLE1 M67I	1/412,0.24%	1/10188	MODERATE
0023966e-7c47-5f2a-bf5e-430395be9726	chrX:g.55007153G>A	Single base substitution	synonymous_variant APEX2 K425K	1/412,0.24%	1/10188	LOW
0023d200-e4d1-57fc-b4b9-a16959e67963	chr8:g.25421669C>G	Single base substitution	splice_acceptor_variant GNRH1 X48_splice	1/412,0.24%	1/10188	HIGH
00251257-86fa-5176-b1af-a025a8cafa5d	chr2:g.202532699G>C	Single base substitution	missense_variant BMPR2 E415Q	1/412,0.24%	1/10188	MODERATE
002517ac-e843-523a-86d1-2eea92dc6dca	chr3:g.184308880A>G	Single base substitution	missense_variant PSMD2 Y906C	1/412,0.24%	1/10188	MODERATE
0025561e-eb88-5a93-a2d2-c07b4ef723d3	chr12:g.52488420C>T	Single base substitution	synonymous_variant KRT6A L444L	1/412,0.24%	1/10188	LOW
0025b13b-cb8c-5a5e-9b58-99dc85bb6b9f	chr2:g.71133131C>T	Single base substitution	missense_variant MPHOSPH10 P108L	1/412,0.24%	1/10188	MODERATE
00260c6a-02e5-5936-b9a7-edd5780dac98	chr6:g.99956058A>T	Single base substitution	missense_variant MCHR2 S30R	1/412,0.24%	1/10188	MODERATE
00262d49-21f6-58c0-89f9-b3be54ae803d	chr6:g.109481309C>G	Single base substitution	missense_variant ZBTB24 D240H	1/412,0.24%	1/10188	MODERATE
0026543c-b364-5fee-bc21-7a3729fc1402	chr11:g.65720731C>T	Single base substitution	missense_variant RNASEH2C E10K	1/412,0.24%	1/10188	MODERATE
00267d37-4cf3-57cc-83d7-99f6802fed6d	chr17:g.7309789G>A	Single base substitution	missense_variant EIF5A G52S	1/412,0.24%	1/10188	MODERATE
0026857e-7d2a-5cff-86a8-afa85fbc0c91	chr6:g.7303616C>T	Single base substitution	missense_variant SSR1 D72N	1/412,0.24%	1/10188	MODERATE
0027525e-19ac-5aa4-8d2a-daf698a00b77	chr13:g.37029811T>C	Single base substitution	missense_variant SUPT20H K316R	1/412,0.24%	1/10188	MODERATE
00278a78-b16d-56c0-9418-eca96df038b6	chr14:g.80792762G>A	Single base substitution	stop_gained CEP128 Q520*	1/412,0.24%	1/10188	HIGH
0027afab-1416-5fb9-8f2c-ef8413d8c6b3	chr7:g.36287773G>A	Single base substitution	synonymous_variant EEPD1 L437L	1/412,0.24%	1/10188	LOW
0027bb4a-9a03-5547-b5d4-3817ef7df400	chr1:g.159856037G>C	Single base substitution	missense_variant VSIG8 L273V	1/412,0.24%	1/10188	MODERATE
002938cb-7f3f-56fd-a6db-1cfa72b4bcf6	chr19:g.43652280G>C	Single base substitution	missense_variant PLAUR F233L	1/412,0.24%	1/10188	MODERATE
0029d830-7511-5ff9-b5ee-f8533c146404	chr10:g.119835653C>G	Single base substitution	missense_variant MCMBP E534Q	1/412,0.24%	1/10188	MODERATE
002b8089-f372-522c-9771-83434a154cda	chr18:g.672950G>A	Single base substitution	missense_variant TYMS E299K	1/412,0.24%	1/10188	MODERATE
002b8d87-0230-5940-ab23-0502086a9a4b	chr16:g.30510403G>A	Single base substitution	missense_variant ITGAL E851K	1/412,0.24%	1/10188	MODERATE
002bab30-1e77-57e8-8e37-e4e890d8397f	chr17:g.7733233G>A	Single base substitution	synonymous_variant DNAH2 Q182Q	1/412,0.24%	1/10188	LOW
002c3a53-c550-5f88-81e5-a89fe4098b8b	chr22:g.50768777C>G	Single base substitution	stop_lost RABL2B *229Sext*23	1/412,0.24%	1/10188	HIGH
002c5be5-9190-5ad9-b19d-14e7fedea264	chr1:g.167966717G>A	Single base substitution	missense_variant DCAF6 R83K	1/412,0.24%	1/10188	MODERATE
002cbc72-24a3-50a7-8e3c-a4796b32a621	chr20:g.63790386G>A	Single base substitution	synonymous_variant ZBTB46 F124F	1/412,0.24%	1/10188	LOW
002d16ce-cb2c-5ff0-9e1e-703648324f10	chr15:g.56093742G>C	Single base substitution	missense_variant RFX7 S1232C	1/412,0.24%	1/10188	MODERATE
002d204b-9e6c-5f3f-91a7-a741541eb9de	chr7:g.134960232_134960233insC	Small insertion	intron_variant CALD1 None	1/412,0.24%	1/10188	MODIFIER
002d4dad-d729-5f03-ade7-cc6f05926ede	chrX:g.48212808G>A	Single base substitution	non_coding_transcript_exon_variant RP11-552E4.3 None	1/412,0.24%	1/10188	MODIFIER
002d5648-9f18-5176-871b-46c9bb1a39fd	chr1:g.237627938C>A	Single base substitution	synonymous_variant RYR2 R2100R	1/412,0.24%	1/10188	LOW
002d8bc9-5de9-52c5-9fb8-b260d0508f5e	chr12:g.22673546G>A	Single base substitution	synonymous_variant ETNK1 Q366Q	1/412,0.24%	1/10188	LOW
002e61b1-ae45-5d39-b2f3-846517c068d1	chr5:g.178213079C>G	Single base substitution	synonymous_variant PHYKPL L399L	1/412,0.24%	1/10188	LOW
002e9e3a-db3d-5689-877a-71ce39e86a52	chr1:g.39293557G>A	Single base substitution	missense_variant MACF1 E703K	1/412,0.24%	1/10188	MODERATE
002f147f-04eb-590e-a04a-311219e991b8	chr13:g.49528564G>C	Single base substitution	missense_variant PHF11 E299Q	1/412,0.24%	1/10188	MODERATE
002f6056-286c-50a1-9ebb-50b8ebeeb32e	chr16:g.3254195C>T	Single base substitution	synonymous_variant MEFV L291L	1/412,0.24%	1/10188	LOW
002fc09d-346f-5ac3-8a88-774932816600	chrX:g.1466340G>A	Single base substitution	synonymous_variant P2RY8 A73A	1/412,0.24%	1/10188	LOW
002fe86c-0b61-576d-a8c6-3ce523cac83c	chr19:g.31276575A>G	Single base substitution	missense_variant TSHZ3 L1073P	1/412,0.24%	1/10188	MODERATE
003079d8-177e-5f8b-97b1-80c6725e281e	chr12:g.26914058_26914059insT	Small insertion	frameshift_variant ASUN T497Nfs*7	1/412,0.24%	1/10188	HIGH
0030c733-7091-5a53-bd5b-dc321022da08	chr3:g.9946313G>A	Single base substitution	missense_variant PRRT3 R954W	1/412,0.24%	1/10188	MODERATE
0030cd3e-025b-584e-ae96-a65db9fb81aa	chr6:g.167826553C>T	Single base substitution	upstream_gene_variant MLLT4 None	1/412,0.24%	1/10188	MODIFIER
0030d221-69b0-5fe9-8aa0-3a57f840fa6d	chrX:g.154349514A>G	Single base substitution	missense_variant FLNA V2535A	1/412,0.24%	1/10188	MODERATE
0031dc25-987c-5d97-ad93-250d1531ce0a	chr19:g.48991433C>T	Single base substitution	missense_variant GYS1 E57K	1/412,0.24%	1/10188	MODERATE
0032a1e9-6726-5cd9-a96c-a605f87ba29b	chr11:g.49576894G>A	Single base substitution	non_coding_transcript_exon_variant RP11-707M1.1 None	1/412,0.24%	1/10188	MODIFIER
0032b9cc-19a1-5f9e-97cb-7c723f773ee3	chr17:g.7583910delTC	Small deletion	frameshift_variant MPDU1 L17Ffs*3	1/412,0.24%	1/10188	HIGH
0032eb3f-41ef-5ff8-9304-eb6fa0549290	chr6:g.30986860G>A	Single base substitution	missense_variant MUC21 E229K	1/412,0.24%	1/10188	MODERATE
00333225-efdc-5590-bd91-345ccae32fa5	chr11:g.534285C>A	Single base substitution	missense_variant HRAS G13V	1/412,0.24%	13/10188	MODERATE
003494a1-e658-5df8-9969-c99867d30ffb	chr21:g.46213780G>A	Single base substitution	missense_variant LSS T356I	1/412,0.24%	1/10188	MODERATE
0034a2fc-6a50-5b18-9f97-834c36047957	chr14:g.74670088C>G	Single base substitution	synonymous_variant AREL1 L549L	1/412,0.24%	1/10188	LOW
00367174-5a98-5454-97c4-6916e13e2260	chr2:g.28850087A>G	Single base substitution	3_prime_UTR_variant TRMT61B None	1/412,0.24%	1/10188	MODIFIER
0036c8b3-7f2e-51d3-adf9-164b5bd6846f	chr3:g.8733820C>T	Single base substitution	5_prime_UTR_variant CAV3 None	1/412,0.24%	1/10188	MODIFIER
003711e3-53ea-57ac-9822-7a35bae40657	chr2:g.219502002C>T	Single base substitution	missense_variant GMPPA R132C	1/412,0.24%	2/10188	MODERATE
00373f05-fdfb-56e6-bdeb-229bbf27004b	chr7:g.122414075C>T	Single base substitution	missense_variant CADPS2 G861E	1/412,0.24%	1/10188	MODERATE
0037e1a1-a161-551c-ac62-b63c0dd9274a	chr14:g.96317798G>C	Single base substitution	missense_variant ATG2B F979L	1/412,0.24%	1/10188	MODERATE
0037fed0-b646-5717-af90-20b0cac91d7a	chr12:g.68648732A>G	Single base substitution	missense_variant RAP1B E3G	1/412,0.24%	1/10188	MODERATE
00389125-82bd-591c-b6d2-73219c0c56a8	chr2:g.96848438C>T	Single base substitution	missense_variant ANKRD39 E139K	1/412,0.24%	1/10188	MODERATE
0038e907-bfcc-559a-8961-20d5e70a853f	chr17:g.82201674C>T	Single base substitution	missense_variant CCDC57 E91K	1/412,0.24%	1/10188	MODERATE
0038f391-c499-54ef-a402-69d8269c8407	chr2:g.203394799G>C	Single base substitution	missense_variant ABI2 Q226H	1/412,0.24%	1/10188	MODERATE
00393ca3-ab53-5e3c-868c-9639f6633bbb	chr9:g.111541786G>A	Single base substitution	missense_variant ZNF483 R284K	1/412,0.24%	1/10188	MODERATE
0039c21f-6813-5c19-9c8d-4c77d4f63fdb	chr1:g.156671082C>T	Single base substitution	missense_variant NES E1036K	1/412,0.24%	1/10188	MODERATE
003a531f-075b-546e-b421-8f53491924a1	chr5:g.141339329G>C	Single base substitution	missense_variant PCDHGA2 E120Q	1/412,0.24%	1/10188	MODERATE
003add90-7141-54fa-bafa-34fa1f8ca1e4	chr1:g.13225347G>A	Single base substitution	missense_variant PRAMEF18 S127F	1/412,0.24%	1/10188	MODERATE
003b410e-2b0a-5d19-9a30-0395b694c703	chr9:g.83972909G>C	Single base substitution	missense_variant HNRNPK L194V	1/412,0.24%	2/10188	MODERATE
003cc558-b1b4-5b61-aa85-2b9b77659ad4	chr16:g.3728369C>T	Single base substitution	synonymous_variant CREBBP A2226A	1/412,0.24%	1/10188	LOW
003d18a4-926e-5159-a838-67be1ce863d3	chr6:g.37652292C>T	Single base substitution	missense_variant MDGA1 S344N	1/412,0.24%	1/10188	MODERATE
003d4957-e6e4-5236-a2c0-11c01400a425	chr8:g.63073032T>C	Single base substitution	synonymous_variant TTPA L87L	1/412,0.24%	2/10188	LOW
003de7bb-aeb2-5c19-8c97-0137c011dfc8	chr12:g.49992024G>A	Single base substitution	missense_variant RACGAP1 S563L	1/412,0.24%	1/10188	MODERATE
003e3965-3b86-56fa-b0ec-18752ff76ec1	chr17:g.39471433C>T	Single base substitution	missense_variant CDK12 S534F	1/412,0.24%	1/10188	MODERATE
003f41b9-ae90-5a82-a6e5-b65e9b8e5202	chr17:g.8492791C>T	Single base substitution	synonymous_variant MYH10 Q1450Q	1/412,0.24%	1/10188	LOW
003f464c-5946-5962-9d59-45bf6ffbc8ce	chr1:g.156677261C>G	Single base substitution	missense_variant NES E2Q	1/412,0.24%	1/10188	MODERATE
003f70e5-914a-5e0b-9846-115033abff12	chr13:g.71440584G>A	Single base substitution	3_prime_UTR_variant DACH1 None	1/412,0.24%	1/10188	MODIFIER
0040de76-534b-508e-a5eb-10e640f142d9	chr2:g.218673903G>A	Single base substitution	missense_variant STK36 E84K	1/412,0.24%	1/10188	MODERATE
0040f419-b0fa-556d-a72a-0ef2af77b215	chrY:g.21395956T>A	Single base substitution	non_coding_transcript_exon_variant RBMY2EP None	1/412,0.24%	1/10188	MODIFIER
004124c6-9b72-5cd6-a10c-602c515f344d	chr17:g.45118918C>T	Single base substitution	synonymous_variant PLCD3 L270L	1/412,0.24%	1/10188	LOW
00415016-b459-5c4a-b023-3f6a59564ca6	chr12:g.64439305A>G	Single base substitution	missense_variant XPOT E932G	1/412,0.24%	1/10188	MODERATE
004170a5-c038-5ef0-8661-ca3cce7afb1f	chr7:g.51030827C>T	Single base substitution	missense_variant COBL D497N	1/412,0.24%	1/10188	MODERATE
004179c3-b6d2-583b-947f-abdff9d90797	chr12:g.71566881G>C	Single base substitution	missense_variant LGR5 V347L	1/412,0.24%	1/10188	MODERATE
004188ed-fc49-59b4-a406-549a77fbb721	chr15:g.43456566C>G	Single base substitution	missense_variant TP53BP1 G676A	1/412,0.24%	1/10188	MODERATE
0041bcca-548a-54dd-b78f-448aca33d231	chr10:g.20164467G>C	Single base substitution	splice_acceptor_variant PLXDC2 X262_splice	1/412,0.24%	1/10188	HIGH
004245ce-68c6-59ac-b1ba-fa56c26ff125	chr3:g.58148314C>T	Single base substitution	missense_variant FLNB S1946F	1/412,0.24%	1/10188	MODERATE
00425013-c202-5f86-bb9d-bb915220bedc	chr11:g.67301060G>A	Single base substitution	missense_variant ANKRD13D D295N	1/412,0.24%	1/10188	MODERATE
004286c0-de8a-5fba-8b8b-04518d9249b9	chr1:g.241999015C>T	Single base substitution	5_prime_UTR_variant MAP1LC3C None	1/412,0.24%	1/10188	MODIFIER
0043146d-b057-579a-afcb-2f85814188d0	chrX:g.17149071G>A	Single base substitution	3_prime_UTR_variant REPS2 None	1/412,0.24%	1/10188	MODIFIER
00433e74-5d17-5e15-8768-12dc9513e93a	chr10:g.7775773G>A	Single base substitution	synonymous_variant KIN S195S	1/412,0.24%	1/10188	LOW
00440d86-9162-59e5-87ad-7b08417a0e63	chr12:g.42355198C>G	Single base substitution	missense_variant PPHLN1 S92C	1/412,0.24%	1/10188	MODERATE
0044460c-22ef-5db1-bb07-b1a3819501c7	chr2:g.132785354G>A	Single base substitution	missense_variant NCKAP5 A486V	1/412,0.24%	1/10188	MODERATE
00444833-4149-5119-9de9-a70b60fa48b5	chr8:g.52645853G>A	Single base substitution	missense_variant RB1CC1 S1279F	1/412,0.24%	1/10188	MODERATE
00447587-b24c-5c6c-8649-31eb509d12a5	chr17:g.59587939C>G	Single base substitution	missense_variant DHX40 P490A	1/412,0.24%	1/10188	MODERATE
0044ad66-e270-56a7-b696-8d16f107468b	chr11:g.94498478T>C	Single base substitution	synonymous_variant ANKRD49 Y222Y	1/412,0.24%	1/10188	LOW
0044c983-2038-5725-a0e2-7a9d764a6d96	chr18:g.45669347G>A	Single base substitution	stop_gained SLC14A2 W693*	1/412,0.24%	1/10188	HIGH
004562ab-0827-5644-bac5-1ff2278e74de	chr15:g.60448113C>G	Single base substitution	missense_variant ICE2 D718H	1/412,0.24%	1/10188	MODERATE
0045c4ea-95bd-5051-a197-bd125db47404	chr5:g.128537614G>T	Single base substitution	5_prime_UTR_variant FBN2 None	1/412,0.24%	2/10188	MODIFIER
0045d2eb-2acb-5f8f-9361-cd239c79ee8c	chr6:g.76022152G>A	Single base substitution	synonymous_variant IMPG1 L210L	1/412,0.24%	1/10188	LOW
0045dec1-e26d-5670-ad1f-3df2c60ccc9b	chr6:g.109450384C>G	Single base substitution	missense_variant MICAL1 M369I	1/412,0.24%	1/10188	MODERATE
0045e72a-bc4f-56b5-81cd-f886515715c8	chr5:g.32090081T>C	Single base substitution	synonymous_variant PDZD2 H2211H	1/412,0.24%	1/10188	LOW
004699a9-11af-5dde-93d2-133435762852	chr1:g.35507000G>C	Single base substitution	missense_variant KIAA0319L S93C	1/412,0.24%	1/10188	MODERATE
0046cdb3-7e91-5b24-a50d-7c811c4105c6	chr5:g.69419472A>G	Single base substitution	synonymous_variant MARVELD2 R29R	1/412,0.24%	1/10188	LOW
0047ea07-021b-5bbf-96d1-7b0ac2380779	chr10:g.71615604C>G	Single base substitution	missense_variant CDH23 I361M	1/412,0.24%	1/10188	MODERATE
00481cb5-17a7-50b9-a755-de4709b120a5	chr6:g.33006757G>C	Single base substitution	3_prime_UTR_variant HLA-DOA None	1/412,0.24%	1/10188	MODIFIER
0048f986-ab77-5f12-80a6-2240c9e31e00	chr20:g.62911399C>T	Single base substitution	missense_variant DIDO1 E72K	1/412,0.24%	1/10188	MODERATE
00495950-8d65-573b-b46e-09e6b1299865	chr1:g.150286931G>A	Single base substitution	missense_variant CIART D379N	1/412,0.24%	1/10188	MODERATE
0049ce84-ad70-5811-b435-6fbd03c001db	chr1:g.219997308G>A	Single base substitution	missense_variant EPRS S739F	1/412,0.24%	1/10188	MODERATE
0049d2f1-6c5e-541d-a8a6-795e45caeb53	chr13:g.24906100C>G	Single base substitution	missense_variant CENPJ E646D	1/412,0.24%	1/10188	MODERATE
004a1c4a-53e0-5c82-9217-9ef03031577f	chr14:g.99175099C>T	Single base substitution	synonymous_variant BCL11B A579A	1/412,0.24%	1/10188	LOW
004a2b72-d05f-51b3-a0bd-85d28b046ae6	chr22:g.40681743T>C	Single base substitution	missense_variant MCHR1 Y362H	1/412,0.24%	1/10188	MODERATE
004a4aea-a737-535b-8701-d87b1b75b92a	chrX:g.47232959C>T	Single base substitution	synonymous_variant USP11 F15F	1/412,0.24%	1/10188	LOW
004aa589-69f2-53cd-a7f6-c7f136746833	chr10:g.50211132T>G	Single base substitution	missense_variant ASAH2 E410D	1/412,0.24%	1/10188	MODERATE
004b429c-e9fc-5733-88e3-714e2aaf5f79	chr11:g.72216817C>T	Single base substitution	5_prime_UTR_variant FOLR2 None	1/412,0.24%	1/10188	MODIFIER
004c1694-8881-528f-b896-da47d415bd07	chr6:g.146029672C>T	Single base substitution	missense_variant GRM1 S52L	1/412,0.24%	2/10188	MODERATE
004c1f58-7a78-545f-a8d1-259922783cc9	chr4:g.72147105G>T	Single base substitution	stop_gained NPFFR2 E288*	1/412,0.24%	1/10188	HIGH
004c32e6-b71a-5d86-a9d6-b408a435d59e	chr6:g.73788503C>G	Single base substitution	missense_variant CD109 I864M	1/412,0.24%	1/10188	MODERATE
004c6364-dc46-53b8-b95c-33078edf7abd	chr1:g.27549382G>A	Single base substitution	stop_gained AHDC1 Q912*	1/412,0.24%	1/10188	HIGH
004cebf9-42b1-5690-bfff-e5a867340613	chr10:g.35029629A>C	Single base substitution	synonymous_variant CUL2 G466G	1/412,0.24%	1/10188	LOW
004d83f0-6036-5c2b-bb77-e6b4d4699e43	chr12:g.52491138C>T	Single base substitution	missense_variant KRT6A E264K	1/412,0.24%	2/10188	MODERATE
004dd01f-535c-5a5f-964a-8ca3a80b1892	chr17:g.75840560G>A	Single base substitution	missense_variant UNC13D R234W	1/412,0.24%	1/10188	MODERATE
004e3b15-390c-59e5-afb6-53dc24bfe91e	chr3:g.197024378C>T	Single base substitution	missense_variant MFI2 V138M	1/412,0.24%	1/10188	MODERATE
004f1658-4c9c-5cc6-a336-d293a7c26d97	chr15:g.58894477G>C	Single base substitution	missense_variant SLTM L445V	1/412,0.24%	1/10188	MODERATE
004f7ace-bd8c-52c2-a8d3-bfad393cf9d0	chr16:g.81044548C>T	Single base substitution	stop_gained ATMIN Q684*	1/412,0.24%	1/10188	HIGH
004fa6c3-74c6-5c15-a002-fc5d48b191b6	chr1:g.67093328C>G	Single base substitution	missense_variant C1orf141 D294H	1/412,0.24%	1/10188	MODERATE
004fb772-72d1-5c6a-878f-a773cb53e48b	chr13:g.113820759G>A	Single base substitution	3_prime_UTR_variant GAS6 None	1/412,0.24%	1/10188	MODIFIER
00506b53-c89b-5637-ae76-d96cb4a6462c	chr7:g.158902412G>A	Single base substitution	missense_variant WDR60 D392N	1/412,0.24%	1/10188	MODERATE
0050dead-d872-5378-bd7d-6c7d4fdb0d55	chr16:g.1204341C>T	Single base substitution	synonymous_variant CACNA1H L778L	1/412,0.24%	1/10188	LOW
005103ea-aa94-5002-b5b0-9cc5c54dbf44	chr7:g.146774317C>A	Single base substitution	missense_variant CNTNAP2 F48L	1/412,0.24%	1/10188	MODERATE
0051dfc3-5524-5938-909d-55bbd63e8a5b	chr6:g.63680076G>C	Single base substitution	synonymous_variant PHF3 L107L	1/412,0.24%	1/10188	LOW
0052425b-ba10-5faa-ae93-bd89fc47ecda	chr17:g.40861675C>T	Single base substitution	missense_variant KRT12 E491K	1/412,0.24%	1/10188	MODERATE
0052dc94-138c-52e2-928f-27b8f2a3a3a8	chr3:g.184187955G>C	Single base substitution	missense_variant ABCF3 E181Q	1/412,0.24%	3/10188	MODERATE
005370e3-84bf-590c-b9a7-26507f29460b	chr20:g.62412863G>A	Single base substitution	synonymous_variant RBBP8NL D571D	1/412,0.24%	2/10188	LOW
00537de3-b95d-553f-821a-12e8c860b0df	chr12:g.103938403G>T	Single base substitution	missense_variant HSP90B1 D307Y	1/412,0.24%	1/10188	MODERATE
0054133b-1499-5367-9104-0e9744ad142b	chr11:g.71458490T>C	Single base substitution	missense_variant NADSYN1 L70P	1/412,0.24%	1/10188	MODERATE
0054401c-a4f5-5502-86fe-d34fd215458d	chr17:g.75724754G>C	Single base substitution	missense_variant ITGB4 L17F	1/412,0.24%	1/10188	MODERATE
00553dfe-7e58-52cf-9bea-cfc2414c8a6d	chr16:g.23532667C>T	Single base substitution	missense_variant EARS2 E353K	1/412,0.24%	1/10188	MODERATE
0055c198-47fa-5ca4-b474-f39a2c4c33ee	chr4:g.182793561G>A	Single base substitution	missense_variant TENM3 D2297N	1/412,0.24%	1/10188	MODERATE
0055c2cf-449c-518e-9317-97bf995b6f6e	chr1:g.20851372G>C	Single base substitution	missense_variant EIF4G3 Q1164E	1/412,0.24%	1/10188	MODERATE
0055d52d-db2b-50c0-96d2-7989131e5f94	chr4:g.13337627G>A	Single base substitution	non_coding_transcript_exon_variant HSP90AB2P None	1/412,0.24%	1/10188	MODIFIER
00561d1c-d833-5e03-85e2-b177acae7eec	chr13:g.19049993G>A	Single base substitution	non_coding_transcript_exon_variant PHF2P2 None	1/412,0.24%	1/10188	MODIFIER
00565377-d961-563b-938b-984f05b227b2	chrX:g.152135366C>G	Single base substitution	missense_variant MAGEA10 Q85H	1/412,0.24%	1/10188	MODERATE
0056b863-b75a-5c1a-ba29-d7a5e9ca2b27	chr11:g.48264269C>T	Single base substitution	stop_gained OR4X1 R137*	1/412,0.24%	1/10188	HIGH
00570b09-eb75-5af7-9792-cb2542aaf9f9	chr8:g.103885774C>G	Single base substitution	stop_gained RIMS2 S200*	1/412,0.24%	1/10188	HIGH
005789d7-8590-5252-8c69-af25854b9c69	chr19:g.35715477G>A	Single base substitution	missense_variant ZBTB32 G284E	1/412,0.24%	1/10188	MODERATE
0057a3d0-3779-576a-ab6e-a7d0b90944d9	chr19:g.42292142G>C	Single base substitution	synonymous_variant CIC L981L	1/412,0.24%	1/10188	LOW
00584301-fc8b-5021-91b9-9a08c830e911	chr5:g.109690295C>T	Single base substitution	5_prime_UTR_variant MAN2A1 None	1/412,0.24%	1/10188	MODIFIER
005866bc-db8b-5c36-9f6d-42a2c9e29074	chr11:g.68600438G>A	Single base substitution	synonymous_variant PPP6R3 P712P	1/412,0.24%	3/10188	LOW
0058b027-8bf6-5358-a13f-5245d8335ecb	chr10:g.89611792G>A	Single base substitution	synonymous_variant PANK1 F320F	1/412,0.24%	1/10188	LOW
005938b2-6f49-5d1c-879d-5af98f2defd8	chr12:g.18683208T>A	Single base substitution	3_prime_UTR_variant PLCZ1 None	1/412,0.24%	1/10188	MODIFIER
005969ac-f6c4-5da5-a663-6a5b265abae3	chr6:g.127476012G>A	Single base substitution	missense_variant SOGA3 R672C	1/412,0.24%	2/10188	MODERATE
005a3f26-ac5d-58dc-9778-199872ebf4b2	chr11:g.2461644G>A	Single base substitution	intron_variant KCNQ1 None	1/412,0.24%	1/10188	MODIFIER
005aeea1-c234-52e7-988b-09ef76c0b38f	chr15:g.72346481C>T	Single base substitution	intron_variant HEXA None	1/412,0.24%	1/10188	MODIFIER
005b2a43-d3d8-5273-bd1d-b189fa8c0302	chr19:g.42056818G>A	Single base substitution	synonymous_variant GRIK5 F249F	1/412,0.24%	1/10188	LOW
005b2ea6-a59e-505b-9b5a-bd5dceb75841	chr2:g.197460028C>T	Single base substitution	synonymous_variant COQ10B I67I	1/412,0.24%	1/10188	LOW
005c056e-16a2-55be-a754-67da3a044f0c	chr8:g.24508553A>G	Single base substitution	3_prime_UTR_variant ADAM7 None	1/412,0.24%	1/10188	MODIFIER
005c7ae8-8012-5b66-8007-06ccc76cb051	chr3:g.48465534C>G	Single base substitution	missense_variant ATRIP P786A	1/412,0.24%	1/10188	MODERATE
005c7b7b-a885-55d3-84a2-c297ef4275dc	chr14:g.47061325C>T	Single base substitution	synonymous_variant MDGA2 T414T	1/412,0.24%	2/10188	LOW
005c9705-ebf1-5e91-9b97-50f7abc109be	chr19:g.49022926C>A	Single base substitution	missense_variant CGB R153L	1/412,0.24%	1/10188	MODERATE
005d9364-270b-57c5-ba2f-b64f5ebc5f87	chr16:g.14989418G>C	Single base substitution	intron_variant PDXDC1 None	1/412,0.24%	1/10188	MODIFIER
005dd3e0-d8c1-509a-a12d-9dd823b404c0	chr15:g.82681163C>A	Single base substitution	missense_variant AP3B2 Q179H	1/412,0.24%	1/10188	MODERATE
005df3d8-f4f4-5885-8103-373288f93bfc	chr19:g.54595250C>G	Single base substitution	stop_gained LILRA1 S170*	1/412,0.24%	1/10188	HIGH
005e9e8e-0857-5a2d-9642-c8bc31838a7c	chr8:g.134602666C>T	Single base substitution	synonymous_variant ZFAT K351K	1/412,0.24%	1/10188	LOW
005f8451-e9ab-5a66-9ce0-52d9bf28da82	chr2:g.127942115C>G	Single base substitution	missense_variant SAP130 R1013T	1/412,0.24%	1/10188	MODERATE
0060779e-f525-5d29-9457-83ca2d9d5885	chr21:g.43107530T>C	Single base substitution	5_prime_UTR_variant U2AF1 None	1/412,0.24%	1/10188	MODIFIER
006124b8-3204-5655-8015-fd86c457242c	chr3:g.53099391C>T	Single base substitution	missense_variant RFT1 E400K	1/412,0.24%	1/10188	MODERATE
00613b19-c553-55ca-a70a-136c55a6bf22	chr3:g.184317391G>A	Single base substitution	missense_variant EIF4G1 R73H	1/412,0.24%	1/10188	MODERATE
0061da65-374b-5d49-ac82-2d0f0d6b3292	chr7:g.77382590C>T	Single base substitution	synonymous_variant GSAP L170L	1/412,0.24%	1/10188	LOW
0062cc77-2cae-5e53-a69e-a151b7fb6d76	chr1:g.35387575C>T	Single base substitution	missense_variant ZMYM4 S745L	1/412,0.24%	1/10188	MODERATE
0062e980-ccd5-5a05-9b99-45b5dbd5ade7	chr17:g.76072469delG	Small deletion	frameshift_variant SRP68 P8Qfs*51	1/412,0.24%	1/10188	HIGH
00642254-4b22-562e-905c-c3ea732a5a95	chr6:g.25811648delGAAGAGTTTCCGGACAGCAATTACGCTGAGAATATTCCTGGTCAG	Small deletion	inframe_deletion SLC17A1 L326_F340del	1/412,0.24%	1/10188	MODERATE
00642a70-4d26-51de-9b2b-5baa4fedc4a2	chr17:g.45437859C>T	Single base substitution	stop_retained_variant PLEKHM1 *1057*	1/412,0.24%	1/10188	LOW
0064b39c-35c9-52b8-9194-f97cc3cbfe16	chr5:g.138391214C>A	Single base substitution	missense_variant KDM3B Q528K	1/412,0.24%	1/10188	MODERATE
0065b93b-862c-508b-af74-db2343cf1d2c	chr7:g.44041105C>T	Single base substitution	upstream_gene_variant DBNL None	1/412,0.24%	1/10188	MODIFIER
00668f3a-64ce-53cb-9cd1-912a3ccfae66	chrX:g.119852989C>T	Single base substitution	5_prime_UTR_variant UPF3B None	1/412,0.24%	1/10188	MODIFIER
0067c0e0-006f-566e-b6da-1f8340ff0328	chr21:g.45455608G>C	Single base substitution	synonymous_variant COL18A1 L26L	1/412,0.24%	1/10188	LOW
0067c6fc-9a44-5679-9a71-b67571045e3f	chr12:g.7487386C>T	Single base substitution	missense_variant CD163 E675K	1/412,0.24%	1/10188	MODERATE
0068554f-aa6c-5d64-8828-95f0ad6be40a	chr11:g.9832242G>A	Single base substitution	stop_gained SBF2 Q1212*	1/412,0.24%	1/10188	HIGH
00694103-787a-56a7-9c54-5f2424c2c0b2	chr12:g.62383938G>C	Single base substitution	missense_variant USP15 L396F	1/412,0.24%	1/10188	MODERATE
006a19e4-aa95-52a8-abe3-8c009d77f127	chr6:g.124962832C>T	Single base substitution	synonymous_variant RNF217 L96L	1/412,0.24%	1/10188	LOW
006ae67b-e89a-52c7-abcf-2a53cc507498	chr3:g.121647436C>T	Single base substitution	synonymous_variant HCLS1 L57L	1/412,0.24%	1/10188	LOW
006c98b6-dff5-58db-9e4e-39e63cef97f9	chr17:g.16624187C>G	Single base substitution	missense_variant ZNF624 E233D	1/412,0.24%	1/10188	MODERATE
006ccd6d-6bb3-5a56-a603-9a2116fbdaae	chr6:g.31271302G>A	Single base substitution	synonymous_variant HLA-C D130D	1/412,0.24%	2/10188	LOW
006d04a3-1270-540e-bd7d-192672506586	chr8:g.85209188C>T	Single base substitution	missense_variant E2F5 S221L	1/412,0.24%	1/10188	MODERATE
006d1f75-e4d8-529b-ab21-5f071e4ee014	chr19:g.54818366G>C	Single base substitution	missense_variant KIR3DL1 R41P	1/412,0.24%	1/10188	MODERATE
006d4992-393b-5932-9b27-7c1f11587e21	chr2:g.224805079G>T	Single base substitution	missense_variant DOCK10 S1366Y	1/412,0.24%	1/10188	MODERATE
006dbba2-bed1-514d-9589-b7559423fb87	chr3:g.69062990G>T	Single base substitution	missense_variant UBA3 P229T	1/412,0.24%	1/10188	MODERATE
006fc709-317a-5f25-b948-1b9e08c4eb47	chr19:g.20125083G>A	Single base substitution	non_coding_transcript_exon_variant CTC-260E6.2 None	1/412,0.24%	1/10188	MODIFIER
006fdf2d-0b85-553e-b8b7-3d1b1b36883f	chr11:g.47178967C>T	Single base substitution	missense_variant PACSIN3 E322K	1/412,0.24%	1/10188	MODERATE
006fe5f4-abed-55c4-88d2-dad1cb5cd74f	chr15:g.55860524G>T	Single base substitution	synonymous_variant NEDD4 A700A	1/412,0.24%	1/10188	LOW
007090ea-8f3d-58bb-9122-1ba77a5664c1	chr9:g.136484781delCTGTTTGAA	Small deletion	non_coding_transcript_exon_variant C9orf163 None	1/412,0.24%	1/10188	MODIFIER
00716896-37d0-5aee-ba67-b64d07919e2d	chr4:g.174977890C>T	Single base substitution	stop_gained ADAM29 Q789*	1/412,0.24%	1/10188	HIGH
0071c39e-eb03-5ce7-8835-d6f55ca3e83a	chr9:g.74671796C>A	Single base substitution	synonymous_variant RORB A384A	1/412,0.24%	1/10188	LOW
00722250-a168-5f4c-aa54-b4a42e308ad6	chr5:g.35697722A>C	Single base substitution	synonymous_variant SPEF2 S690S	1/412,0.24%	1/10188	LOW
0072521e-935f-5fd2-8413-96b9a71c8e67	chr19:g.42442830C>T	Single base substitution	start_lost CXCL17 M1?	1/412,0.24%	2/10188	HIGH
0072ae39-4746-5438-bb11-a416bf907a49	chrX:g.102657418C>T	Single base substitution	missense_variant GPRASP1 P1169S	1/412,0.24%	1/10188	MODERATE
00731be2-4754-5462-8828-4c76aea6eeda	chr10:g.27250824C>T	Single base substitution	downstream_gene_variant RP11-85G18.6 None	1/412,0.24%	1/10188	MODIFIER
00735e66-3550-5c2a-a9bc-1295d6ad1ef4	chr4:g.99279448C>G	Single base substitution	missense_variant ADH1A D361H	1/412,0.24%	2/10188	MODERATE
0073c303-ae2f-5d0a-8d7b-d1d96e1457f5	chr19:g.41579453C>G	Single base substitution	missense_variant CEACAM21 F175L	1/412,0.24%	1/10188	MODERATE
0073fc2c-62a4-5894-8a97-3badc91d4dc5	chr14:g.99721281C>A	Single base substitution	stop_gained CYP46A1 Y341*	1/412,0.24%	1/10188	HIGH
0074d8d3-eb30-5245-9ff9-76e389b9902f	chr7:g.118224827C>T	Single base substitution	5_prime_UTR_variant ANKRD7 None	1/412,0.24%	1/10188	MODIFIER
0074f20a-6365-59b1-8462-694763e27a32	chr20:g.61852822C>T	Single base substitution	synonymous_variant CDH4 V267V	1/412,0.24%	1/10188	LOW
0076a7f0-4339-5788-8e82-83e640d9594e	chr2:g.178530549C>G	Single base substitution	missense_variant TTN E33715Q	1/412,0.24%	1/10188	MODERATE
00772b9f-4396-552e-9273-7abc62895b57	chr1:g.153747383_153747384insTAATTCA	Small insertion	intron_variant INTS3 None	1/412,0.24%	1/10188	MODIFIER
007731d6-cf93-5748-8b40-49e366d61576	chrX:g.124071154C>T	Single base substitution	synonymous_variant STAG2 F788F	1/412,0.24%	1/10188	LOW
007750fc-db80-546b-8305-a1abb9448ffa	chr6:g.41799855G>C	Single base substitution	missense_variant USP49 L549V	1/412,0.24%	1/10188	MODERATE
0077a8eb-bcc7-50b6-b7f0-7c7823bb9007	chr19:g.4950897T>G	Single base substitution	missense_variant UHRF1 F573L	1/412,0.24%	1/10188	MODERATE
007879f4-952c-562c-b0e2-70370421d58d	chr22:g.36526132C>G	Single base substitution	splice_acceptor_variant EIF3D None	1/412,0.24%	1/10188	HIGH
00794e73-fa33-5e56-b025-e841888bce3e	chrX:g.16689599G>A	Single base substitution	splice_region_variant CTPS2 V241V	1/412,0.24%	1/10188	LOW
007a820a-1744-5e06-b2d1-31e2c0767e13	chr1:g.196672987A>C	Single base substitution	missense_variant CFH E23A	1/412,0.24%	1/10188	MODERATE
007c6957-3131-57cc-89cd-f5bc63e81b48	chr11:g.77103146A>T	Single base substitution	missense_variant OMP T103S	1/412,0.24%	1/10188	MODERATE
007cd390-2fcf-5ecb-8d56-d4e41fa03353	chr10:g.6430872G>A	Single base substitution	missense_variant PRKCQ R635W	1/412,0.24%	4/10188	MODERATE
007d7df5-6661-5108-bde7-9cbf0dd6c640	chr10:g.29458448C>T	Single base substitution	missense_variant SVIL D2182N	1/412,0.24%	2/10188	MODERATE
007dcb67-4699-5a25-ad31-b94fd53feca6	chr16:g.30521617G>T	Single base substitution	synonymous_variant ITGAL L1155L	1/412,0.24%	1/10188	LOW
007e04ab-7dfd-57dc-88ac-13cde203a780	chr19:g.18200367C>A	Single base substitution	missense_variant RAB3A D103Y	1/412,0.24%	1/10188	MODERATE
007e5e9c-0e6a-54f3-814b-c4d1e0a73ea3	chr17:g.45508077G>A	Single base substitution	downstream_gene_variant LRRC37A4P None	1/412,0.24%	1/10188	MODIFIER
007e8013-3d4e-591e-bb02-53d6fd6f2d4e	chr5:g.43295796C>T	Single base substitution	synonymous_variant HMGCS1 Q287Q	1/412,0.24%	1/10188	LOW
007f3476-ae0c-54d0-aecf-ee3334232850	chr4:g.150590797G>C	Single base substitution	missense_variant LRBA Q2048E	1/412,0.24%	1/10188	MODERATE
007f4d7b-1f4b-51cc-bc64-70fde12827c0	chr11:g.68158691G>C	Single base substitution	missense_variant SUV420H1 S552C	1/412,0.24%	2/10188	MODERATE
00806fdd-04bd-5a18-9601-11aadd2f1704	chr11:g.62995799C>T	Single base substitution	synonymous_variant SLC22A8 Q302Q	1/412,0.24%	1/10188	LOW
0080abdc-b654-5345-8dd4-e9043c7d0519	chr4:g.143469179G>C	Single base substitution	missense_variant GAB1 S692T	1/412,0.24%	1/10188	MODERATE
0080f1bf-b919-50e4-950b-537f7143eeb3	chr17:g.69123279C>G	Single base substitution	missense_variant ABCA6 E466Q	1/412,0.24%	1/10188	MODERATE
0081656e-ad23-5658-b8cf-f22c06eeb655	chr4:g.69849533C>T	Single base substitution	missense_variant SULT1E1 V134M	1/412,0.24%	1/10188	MODERATE
00823498-b273-554c-a1fe-0337fd0f2106	chr19:g.42405554C>G	Single base substitution	missense_variant LIPE K791N	1/412,0.24%	1/10188	MODERATE
008279ee-f1d1-5386-b6aa-853b30b3cf9a	chr5:g.228306G>C	Single base substitution	missense_variant SDHA R248T	1/412,0.24%	2/10188	MODERATE
0082bf39-2c98-548c-a0d7-23a32be68cc6	chr3:g.98264498C>T	Single base substitution	missense_variant OR5H6 H72Y	1/412,0.24%	2/10188	MODERATE
0082c887-e223-54e2-b5a1-ffc7af9084ef	chr17:g.36166277G>A	Single base substitution	synonymous_variant TBC1D3B P456P	1/412,0.24%	1/10188	LOW
0083323d-9ed2-5717-bad9-4b6ff4c3830a	chr4:g.68461849G>A	Single base substitution	missense_variant TMPRSS11E V14I	1/412,0.24%	1/10188	MODERATE
008345d0-7316-512d-87cf-4d20fa445c51	chr5:g.151281044A>G	Single base substitution	missense_variant SLC36A3 S372P	1/412,0.24%	1/10188	MODERATE
0083a552-bb3d-5719-ab39-af86e07ea6d1	chr9:g.19435041C>T	Single base substitution	synonymous_variant ACER2 L154L	1/412,0.24%	1/10188	LOW
0083daf0-9530-5143-b52e-3b629fea3b79	chr2:g.88027840C>G	Single base substitution	missense_variant KRCC1 G242R	1/412,0.24%	1/10188	MODERATE
00840ee7-855c-57bf-b084-cbfdcf8ff0b8	chr9:g.86310017C>A	Single base substitution	missense_variant ZCCHC6 A1127S	1/412,0.24%	1/10188	MODERATE
0085e387-892a-5732-a248-a1d94ad2e7a4	chr3:g.109007070C>T	Single base substitution	missense_variant MORC1 E576K	1/412,0.24%	4/10188	MODERATE
00865101-7be6-5ad6-b8e2-f568dffa2850	chr17:g.67018213G>A	Single base substitution	missense_variant CACNG4 R82Q	1/412,0.24%	1/10188	MODERATE
00869560-0c1e-5e1c-8c76-18e1f4c1dd32	chrX:g.53565121C>T	Single base substitution	missense_variant HUWE1 E2276K	1/412,0.24%	1/10188	MODERATE
0087d2d8-f743-5bf3-811c-31921af7fd81	chr1:g.53461552G>A	Single base substitution	synonymous_variant DMRTB1 P219P	1/412,0.24%	3/10188	LOW
00881fb5-76a0-5bde-86b3-feb1174486bd	chr12:g.6588300G>C	Single base substitution	missense_variant CHD4 Q1155E	1/412,0.24%	1/10188	MODERATE
00884917-fc74-57b2-82cb-eb07960c8c9b	chr12:g.68856426C>T	Single base substitution	3_prime_UTR_variant CPM None	1/412,0.24%	1/10188	MODIFIER
00892aed-fea8-5b9a-ba54-f5f4d006a5aa	chr17:g.73285933G>A	Single base substitution	synonymous_variant CDC42EP4 L190L	1/412,0.24%	1/10188	LOW
0089b591-7663-5985-9624-815558d1d593	chr2:g.79137129T>C	Single base substitution	intron_variant REG1P None	1/412,0.24%	1/10188	MODIFIER
0089dca5-1f9f-52fc-b8c6-e0541b8001de	chr4:g.39849583C>G	Single base substitution	missense_variant PDS5A K1052N	1/412,0.24%	1/10188	MODERATE
008aa0bd-4838-524d-91d0-14b73592ef1b	chr1:g.64835476C>A	Single base substitution	missense_variant JAK1 G1097C	1/412,0.24%	1/10188	MODERATE
008abb9e-396d-53d1-83cf-d4a36c26e10e	chr6:g.31627106G>A	Single base substitution	missense_variant PRRC2A E400K	1/412,0.24%	1/10188	MODERATE
008b030e-23fa-505d-9f5f-7325f7346270	chr1:g.42758915C>G	Single base substitution	missense_variant P3H1 E293Q	1/412,0.24%	1/10188	MODERATE
008b68f6-538c-5d89-af69-cc45d17b6f14	chr6:g.36324188C>A	Single base substitution	stop_gained C6orf222 E391*	1/412,0.24%	3/10188	HIGH
008c9c4c-12f2-5ede-a3fb-d0e3cdb6d02d	chr4:g.113311376C>T	Single base substitution	synonymous_variant ANK2 S890S	1/412,0.24%	1/10188	LOW
008cee49-a79d-5a00-b205-3c02399f18d4	chr5:g.141394896G>A	Single base substitution	missense_variant PCDHGA8 V695M	1/412,0.24%	1/10188	MODERATE
008d03dd-eb93-503e-8bd2-6512bb9d9ce1	chr7:g.101195843G>A	Single base substitution	3_prime_UTR_variant MOGAT3 None	1/412,0.24%	1/10188	MODIFIER
008e8371-c660-50d1-bf09-d7abf29840bc	chr1:g.202012073C>G	Single base substitution	missense_variant ELF3 R94G	1/412,0.24%	1/10188	MODERATE
008ec183-7978-5c42-97e8-a7b19c979ecd	chr3:g.9470904C>T	Single base substitution	missense_variant SETD5 P1057L	1/412,0.24%	1/10188	MODERATE
008f234b-849e-5f19-bfef-f3fbf5a4eb11	chr13:g.48256274T>G	Single base substitution	missense_variant ITM2B I115S	1/412,0.24%	2/10188	MODERATE
008f851d-727b-5fa8-9d0c-5d5d06e2b647	chr17:g.75978566G>A	Single base substitution	synonymous_variant ACOX1 I79I	1/412,0.24%	1/10188	LOW
008faa8c-c01e-5d0c-9ac0-6d3a945afbd9	chr16:g.24790048C>T	Single base substitution	missense_variant TNRC6A S469L	1/412,0.24%	2/10188	MODERATE
008fab86-b1b8-5acc-bd5c-f2e621a41c50	chr14:g.56617206T>C	Single base substitution	missense_variant TMEM260 V322A	1/412,0.24%	1/10188	MODERATE
008fca71-34ca-5f11-8547-f1941d908e30	chr9:g.122990179G>A	Single base substitution	missense_variant RABGAP1 E297K	1/412,0.24%	1/10188	MODERATE
008fd387-62db-55bd-a326-a4c14164f95c	chr9:g.65284127G>C	Single base substitution	stop_gained FOXD4L5 S84*	1/412,0.24%	1/10188	HIGH
008fe300-c0bd-56a0-b5cb-b5fc09d3a06c	chr16:g.19669297C>A	Single base substitution	missense_variant C16orf62 P787T	1/412,0.24%	1/10188	MODERATE
008ff02c-446e-577c-af3b-abd19284abc1	chr17:g.19785972C>G	Single base substitution	missense_variant ULK2 C739S	1/412,0.24%	1/10188	MODERATE
009052c5-cb2d-518e-ab04-b8a2566af678	chr1:g.214483094G>A	Single base substitution	intron_variant PTPN14 None	1/412,0.24%	2/10188	MODIFIER
009092ad-caa8-5151-bc51-ebd76bbbb5a9	chr15:g.64397714G>A	Single base substitution	missense_variant TRIP4 D172N	1/412,0.24%	2/10188	MODERATE
0090a815-213a-5752-8560-2d3df617a432	chr4:g.70768610G>C	Single base substitution	synonymous_variant RUFY3 L215L	1/412,0.24%	1/10188	LOW
009101a6-edb2-5c58-8f8e-addc6b3102b3	chr19:g.56815713C>T	Single base substitution	missense_variant PEG3 G910E	1/412,0.24%	1/10188	MODERATE
00917ffd-c8fb-51fe-adea-c48ff3035707	chr12:g.55961630C>T	Single base substitution	missense_variant PMEL C60Y	1/412,0.24%	1/10188	MODERATE
0091f3d7-0c58-57ed-ad88-626b2a34d243	chr11:g.122904414_122904415insA	Small insertion	frameshift_variant C11orf63 R281Kfs*35	1/412,0.24%	2/10188	HIGH
0092213f-592e-5c99-bafd-237f37cf3b1e	chr17:g.56350850C>T	Single base substitution	synonymous_variant ANKFN1 N94N	1/412,0.24%	3/10188	LOW
00927923-dfc7-5695-a139-ff56bf729f87	chr9:g.104132063C>T	Single base substitution	missense_variant SMC2 L1016F	1/412,0.24%	1/10188	MODERATE
00927b43-e4f8-57ec-86fd-352c6fcec8cc	chr22:g.38115622T>G	Single base substitution	missense_variant PLA2G6 N647H	1/412,0.24%	1/10188	MODERATE
00933d15-0e31-525c-aaae-8d422c988c90	chr19:g.48303027C>T	Single base substitution	missense_variant CCDC114 E316K	1/412,0.24%	1/10188	MODERATE
009431de-279d-58ee-85d6-0e753d3ba024	chr19:g.53073499C>A	Single base substitution	intron_variant ZNF160 None	1/412,0.24%	1/10188	MODIFIER
0094a53d-9ca5-5b83-98ef-aa066afe99d6	chr10:g.29532687C>A	Single base substitution	missense_variant SVIL L560F	1/412,0.24%	1/10188	MODERATE
0094de99-9c73-5c8a-92ef-c0d09dee206a	chr11:g.64244086A>C	Single base substitution	3_prime_UTR_variant FKBP2 None	1/412,0.24%	1/10188	MODIFIER
0095ce8b-45ad-5df7-a902-f95b1fe8cf79	chr16:g.27533387C>T	Single base substitution	splice_region_variant GTF3C1 R251R	1/412,0.24%	1/10188	LOW
0096a7e6-42d2-5880-8329-4f648b8d0584	chr1:g.151266391G>C	Single base substitution	missense_variant PSMD4 E283Q	1/412,0.24%	1/10188	MODERATE
00982459-79a6-54a3-b707-661c08f15b5c	chr5:g.14608984G>C	Single base substitution	synonymous_variant FAM105A L288L	1/412,0.24%	1/10188	LOW
009946f1-31f9-573d-a9af-0d8a4a59fbcb	chr3:g.101821467A>G	Single base substitution	missense_variant NXPE3 K398R	1/412,0.24%	1/10188	MODERATE
00997c45-17e0-546a-b5fc-f2779ccfab7f	chr16:g.24569263A>G	Single base substitution	missense_variant RBBP6 E858G	1/412,0.24%	1/10188	MODERATE
009aa3fe-5a9c-5720-a5c3-b68f04c4bf5a	chr12:g.45851421C>T	Single base substitution	stop_gained ARID2 Q1100*	1/412,0.24%	1/10188	HIGH
009ab6f6-f1bc-5f0b-ba73-6ba5dc141562	chr13:g.41193649G>A	Single base substitution	synonymous_variant KBTBD7 L203L	1/412,0.24%	1/10188	LOW
009ae844-bfea-557f-9a66-cf3403410420	chr3:g.10249597G>A	Single base substitution	missense_variant TATDN2 E133K	1/412,0.24%	1/10188	MODERATE
009b2263-fb5a-52b5-938e-8b06ea971794	chr6:g.21230969C>T	Single base substitution	missense_variant CDKAL1 A557V	1/412,0.24%	1/10188	MODERATE
009b47bd-6710-5d78-b4c0-068c8b1d3780	chr2:g.38985703G>T	Single base substitution	3_prime_UTR_variant SOS1 None	1/412,0.24%	1/10188	MODIFIER
009ba1c7-8238-59ea-bc8c-03b93de60260	chr1:g.59833459G>A	Single base substitution	missense_variant HOOK1 E110K	1/412,0.24%	2/10188	MODERATE
009c22ea-98f8-570e-b1cb-0c881fd50835	chr18:g.32287497T>A	Single base substitution	missense_variant GAREM H367L	1/412,0.24%	1/10188	MODERATE
009c4728-c95b-5a96-a367-fbddb7479dcb	chr10:g.43200709G>A	Single base substitution	synonymous_variant RASGEF1A C213C	1/412,0.24%	1/10188	LOW
009d2c5f-91b7-5479-bd6e-dfee6b583b8b	chr5:g.176889679C>T	Single base substitution	synonymous_variant HK3 P232P	1/412,0.24%	1/10188	LOW
009d3a47-3c78-525d-9926-7e1ad1f5b54a	chr10:g.68967066G>T	Single base substitution	missense_variant DDX21 R318L	1/412,0.24%	1/10188	MODERATE
009dae18-c580-510b-a899-a76148cd2d9d	chr11:g.47215100C>T	Single base substitution	5_prime_UTR_variant DDB2 None	1/412,0.24%	1/10188	MODIFIER
009dc9ff-2192-5e51-9807-22f47961f526	chr1:g.244856155T>A	Single base substitution	missense_variant HNRNPU N639I	1/412,0.24%	1/10188	MODERATE
009f6844-510e-561b-bfa3-48d2b204766e	chr20:g.23985754G>T	Single base substitution	synonymous_variant GGTLC1 G148G	1/412,0.24%	1/10188	LOW
009f8b65-6cb7-577f-80f8-17058cbc21f0	chr17:g.7415962G>A	Single base substitution	missense_variant NLGN2 D497N	1/412,0.24%	1/10188	MODERATE
009fe7d9-a143-533f-b58f-3921a417b937	chr4:g.71357065A>G	Single base substitution	missense_variant SLC4A4 K203R	1/412,0.24%	1/10188	MODERATE
00a0875d-be73-58e7-a44d-e23b9cf6f7b5	chr4:g.166043333G>A	Single base substitution	missense_variant TLL1 D480N	1/412,0.24%	1/10188	MODERATE
00a0e5dd-ec90-5e9f-89eb-efc5b228a4fd	chr11:g.6621945G>A	Single base substitution	missense_variant DCHS1 S3244F	1/412,0.24%	1/10188	MODERATE
00a1015f-2bd0-5a9a-8e52-358cf3cbe2d7	chr6:g.108664068C>G	Single base substitution	missense_variant FOXO3 S412C	1/412,0.24%	1/10188	MODERATE
00a157d8-1651-5901-a2f9-946b4141744b	chr9:g.74762061G>A	Single base substitution	missense_variant TRPM6 A1537V	1/412,0.24%	1/10188	MODERATE
00a1af6e-b86d-58e2-a10e-584cfccbed9d	chr7:g.127598485G>A	Single base substitution	synonymous_variant FSCN3 T337T	1/412,0.24%	1/10188	LOW
00a1bf87-374c-56ad-8b58-eabf1d5a92cc	chr19:g.14097851C>A	Single base substitution	synonymous_variant PRKACA L153L	1/412,0.24%	1/10188	LOW
00a1f352-16a7-5c16-8d6f-db8e9b731504	chr3:g.100304871C>A	Single base substitution	missense_variant TBC1D23 A430D	1/412,0.24%	1/10188	MODERATE
00a265f0-d11a-5360-829f-b80b519d17f5	chr1:g.157833434C>G	Single base substitution	missense_variant CD5L G266A	1/412,0.24%	1/10188	MODERATE
00a2b43a-15b4-5f1b-b8e2-4bfbb1588e56	chr9:g.128268488C>T	Single base substitution	missense_variant GOLGA2 D82N	1/412,0.24%	1/10188	MODERATE
00a31a31-9734-5ccf-801a-9922b99543ac	chr10:g.20245424C>T	Single base substitution	synonymous_variant PLXDC2 V464V	1/412,0.24%	1/10188	LOW
00a31fe9-f837-5bb0-9b26-19c7b08a70bc	chr9:g.136516036C>G	Single base substitution	missense_variant NOTCH1 K538N	1/412,0.24%	1/10188	MODERATE
00a32bba-6cae-53a0-a3b9-97f347bc0c90	chr7:g.115941000G>A	Single base substitution	intron_variant TFEC None	1/412,0.24%	1/10188	MODIFIER
00a3d77e-b325-51be-8e09-50808429eb3b	chr14:g.24974730T>A	Single base substitution	missense_variant STXBP6 K30M	1/412,0.24%	1/10188	MODERATE
00a3e251-f99e-53ca-99bb-cd61579153cc	chr17:g.63818266G>C	Single base substitution	missense_variant DDX42 K895N	1/412,0.24%	1/10188	MODERATE
00a42247-7937-5d3c-8c2f-964c9fb59d44	chr1:g.240093493G>A	Single base substitution	missense_variant FMN2 V462I	1/412,0.24%	1/10188	MODERATE
00a429ce-e245-51a4-a3ae-731bf8aa0fe2	chr19:g.2853588A>G	Single base substitution	missense_variant ZNF555 Y508C	1/412,0.24%	1/10188	MODERATE
00a4776e-7b1d-59b9-b356-b2bc2df8b943	chr2:g.106843737G>C	Single base substitution	missense_variant ST6GAL2 P81A	1/412,0.24%	1/10188	MODERATE
00a4962c-cf9b-59fc-8c41-2f31f49f134a	chr21:g.18275300G>A	Single base substitution	missense_variant TMPRSS15 P934L	1/412,0.24%	2/10188	MODERATE
00a50301-4b28-5488-b89f-596413e898f8	chr20:g.36768038G>C	Single base substitution	synonymous_variant DSN1 L120L	1/412,0.24%	1/10188	LOW
00a5a665-1236-5141-8847-07163f39cb57	chr17:g.75518992G>C	Single base substitution	splice_region_variant TSEN54 None	1/412,0.24%	1/10188	LOW
00a5d2f3-1085-558b-8eb6-40295b7c6dec	chr9:g.97309447A>C	Single base substitution	missense_variant CCDC180 K79Q	1/412,0.24%	1/10188	MODERATE
00a793c2-da2d-59ed-8b86-2c00a50a805e	chr12:g.29583424T>A	Single base substitution	synonymous_variant TMTC1 S467S	1/412,0.24%	1/10188	LOW
00a98c7e-348c-51fd-858c-6fed63d56789	chr2:g.206004571C>T	Single base substitution	missense_variant INO80D E961K	1/412,0.24%	1/10188	MODERATE
00a9a446-ce35-5a98-a6c8-9f267a72ae6c	chr4:g.53460792G>A	Single base substitution	3_prime_UTR_variant LNX1 None	1/412,0.24%	1/10188	MODIFIER
00aa6de8-a4bc-58f3-9c74-050c9790c02e	chr2:g.171785396A>T	Single base substitution	missense_variant SLC25A12 Y639N	1/412,0.24%	1/10188	MODERATE
00aa73c3-75ce-5476-9ea8-5acf31168906	chr1:g.173909828G>A	Single base substitution	missense_variant SERPINC1 R293W	1/412,0.24%	2/10188	MODERATE
00aa9071-e0f0-56da-9bf2-4a957e98c628	chr17:g.78117825G>C	Single base substitution	synonymous_variant TMC6 V666V	1/412,0.24%	1/10188	LOW
00aa9e81-8fb1-52ac-973e-c8b6d2f23cba	chr10:g.62399533G>A	Single base substitution	missense_variant ZNF365 R323Q	1/412,0.24%	1/10188	MODERATE
00ab28fc-8722-54b4-8f53-a2753ca0af02	chr7:g.142864540A>T	Single base substitution	missense_variant EPHB6 Q247L	1/412,0.24%	1/10188	MODERATE
00ab5857-9ed8-5de1-b2c6-506d343d0528	chr8:g.1957101G>A	Single base substitution	synonymous_variant ARHGEF10 L1316L	1/412,0.24%	1/10188	LOW
00abd437-ebb0-591c-bf8c-1359002f8d42	chr10:g.84208833G>T	Single base substitution	missense_variant CDHR1 E424D	1/412,0.24%	1/10188	MODERATE
00ac4509-0999-5bc1-b038-0e3b9f98f6a9	chr1:g.173486327G>A	Single base substitution	missense_variant PRDX6 D158N	1/412,0.24%	1/10188	MODERATE
00aca776-be2d-514e-a78a-c8ca2178ae5a	chr3:g.185716471C>T	Single base substitution	intron_variant IGF2BP2 None	1/412,0.24%	1/10188	MODIFIER
00acb908-3c93-5c3f-a8bd-28984796ff8a	chr12:g.55749547C>T	Single base substitution	missense_variant GDF11 R297W	1/412,0.24%	1/10188	MODERATE
00ace584-fd4d-595e-ba18-ad5388fe99bf	chr17:g.81844019T>C	Single base substitution	missense_variant P4HB E507G	1/412,0.24%	1/10188	MODERATE
00af0660-4d43-5044-a3cc-b5ed5a605d65	chr1:g.119768845C>T	Single base substitution	5_prime_UTR_variant HMGCS2 None	1/412,0.24%	1/10188	MODIFIER
00af59b7-5489-5b5f-9121-d364287f8e0e	chr19:g.54217220G>A	Single base substitution	missense_variant LILRB3 S591F	1/412,0.24%	1/10188	MODERATE
00af8e38-62ea-57ee-80a5-b81c86b2c5e7	chr15:g.30410351G>T	Single base substitution	intron_variant GOLGA8R None	1/412,0.24%	1/10188	MODIFIER
00b05785-ab7c-52bb-9f93-55dce9eb1a42	chr5:g.124641337G>T	Single base substitution	missense_variant ZNF608 F1455L	1/412,0.24%	1/10188	MODERATE
00b1880e-bcc9-5fa8-a9f6-40e20209fd9a	chr1:g.206102026C>T	Single base substitution	3_prime_UTR_variant C1orf186 None	1/412,0.24%	2/10188	MODIFIER
00b1ad1a-8ccf-59ef-85c9-75a9c91aa2e5	chrX:g.87518253T>C	Single base substitution	synonymous_variant KLHL4 C120C	1/412,0.24%	1/10188	LOW
00b20872-f900-5630-b2f9-07770d6e960a	chr20:g.34412619T>G	Single base substitution	stop_gained ITCH L106*	1/412,0.24%	1/10188	HIGH
00b2245e-d1fe-5b7a-bfbe-24177600321e	chr11:g.1247791C>T	Single base substitution	synonymous_variant MUC5B S3637S	1/412,0.24%	1/10188	LOW
00b31ce7-7469-58c8-b306-076524d507a3	chr22:g.41343453G>A	Single base substitution	missense_variant ZC3H7B E446K	1/412,0.24%	1/10188	MODERATE
00b35afb-46c8-51dc-9f65-4f1da1ac00a3	chr2:g.21016645C>T	Single base substitution	synonymous_variant APOB A1042A	1/412,0.24%	3/10188	LOW
00b3b142-28bd-5bfc-8410-a012f5a6843d	chr4:g.188098970T>A	Single base substitution	intron_variant TRIML2 None	1/412,0.24%	1/10188	MODIFIER
00b4296d-ef8d-5ea3-b8b0-df93f4f24054	chr1:g.89060316G>T	Single base substitution	missense_variant GBP1 L67M	1/412,0.24%	1/10188	MODERATE
00b4bb3f-840b-5f6c-9622-7e68e8097dc6	chr11:g.65242011G>A	Single base substitution	non_coding_transcript_exon_variant SLC22A20 None	1/412,0.24%	1/10188	MODIFIER
00b56ac2-1227-53d9-8ce1-f4b7ef984d30	chr3:g.45110776G>A	Single base substitution	missense_variant CDCP1 P241S	1/412,0.24%	1/10188	MODERATE
00b5e25a-958d-5a80-9b92-459f628af254	chr2:g.56372375G>C	Single base substitution	missense_variant CCDC85A R450T	1/412,0.24%	1/10188	MODERATE
00b61c27-ba6e-5baa-9dc5-85cd8ba42edf	chr4:g.169009952G>A	Single base substitution	synonymous_variant CBR4 L46L	1/412,0.24%	1/10188	LOW
00b77329-089d-5970-a8a8-266e0c738ad4	chr9:g.127455579C>G	Single base substitution	missense_variant LRSAM1 P45A	1/412,0.24%	1/10188	MODERATE
00b8dffe-1de6-5b0a-838c-1464af5853f0	chr9:g.72149506C>G	Single base substitution	5_prime_UTR_variant GDA None	1/412,0.24%	1/10188	MODIFIER
00b8f6c1-fe04-53e4-95ef-de9d4843f3c0	chr3:g.147410447C>T	Single base substitution	missense_variant ZIC1 A112V	1/412,0.24%	1/10188	MODERATE
00ba2f06-b909-5b31-918a-2fa39082ec95	chr4:g.54657953C>T	Single base substitution	5_prime_UTR_variant KIT None	1/412,0.24%	1/10188	MODIFIER
00ba52a5-a7f2-5e94-8529-b66c778a3f74	chr3:g.167697123C>G	Single base substitution	missense_variant PDCD10 E52Q	1/412,0.24%	1/10188	MODERATE
00badb84-fcdf-52ea-8edf-710b0d4effc2	chr10:g.103419594G>T	Single base substitution	missense_variant PDCD11 K721N	1/412,0.24%	1/10188	MODERATE
00bae0c3-1d48-5361-81b5-22c27bf6402d	chr1:g.46035643G>C	Single base substitution	missense_variant MAST2 W1658C	1/412,0.24%	1/10188	MODERATE
00bb19c4-f92f-5778-8aa8-c6e3968ecb27	chr14:g.60714121G>A	Single base substitution	synonymous_variant SIX4 F544F	1/412,0.24%	1/10188	LOW
00bb52f7-855a-5022-af94-14c348155e2f	chr9:g.713382delTA	Small deletion	frameshift_variant KANK1 I873Qfs*10	1/412,0.24%	1/10188	HIGH
00bbc560-6ea2-5341-919c-37144bfeddd1	chr10:g.68885130G>T	Single base substitution	missense_variant STOX1 G445V	1/412,0.24%	1/10188	MODERATE
00bd1850-cbf8-5ece-a084-f91cc15b219f	chrX:g.11143886G>A	Single base substitution	intron_variant ARHGAP6 None	1/412,0.24%	1/10188	MODIFIER
00bd46ff-0a6a-5f6c-92ee-fb8ad77ad63e	chr9:g.111727679C>A	Single base substitution	missense_variant C9orf84 K532N	1/412,0.24%	1/10188	MODERATE
00bdcb3d-b4c6-5d5b-ba1d-3070360fe9fd	chr16:g.48104345G>A	Single base substitution	synonymous_variant ABCC12 F899F	1/412,0.24%	1/10188	LOW
00bdcef2-120f-5222-b49d-8e95d2295edf	chr1:g.226152514C>T	Single base substitution	missense_variant ACBD3 R399Q	1/412,0.24%	1/10188	MODERATE
00bde798-de90-56ab-8419-50e488b468e0	chr16:g.72060909C>T	Single base substitution	3_prime_UTR_variant HP None	1/412,0.24%	1/10188	MODIFIER
00bdf316-97b5-5b06-8c45-4b929db3d871	chr2:g.178738313C>T	Single base substitution	missense_variant TTN G4397S	1/412,0.24%	1/10188	MODERATE
00be0c50-67b6-5f21-bf06-c28ee0f085a1	chr19:g.41354765C>T	Single base substitution	missense_variant B9D2 G155S	1/412,0.24%	1/10188	MODERATE
00be7819-796a-5e4d-aa63-5fe41472af86	chr9:g.39359656C>G	Single base substitution	missense_variant SPATA31A1 P631A	1/412,0.24%	1/10188	MODERATE
00bfd039-5e79-5ea6-a3a8-198f6aaead22	chr11:g.89798521G>T	Single base substitution	missense_variant TRIM49 A323E	1/412,0.24%	1/10188	MODERATE
00bfe415-79f4-52d2-a817-127d86770d68	chr3:g.133588119G>C	Single base substitution	3_prime_UTR_variant CDV3 None	1/412,0.24%	1/10188	MODIFIER
00c0511f-9b55-52bf-957f-8b5dd319ad04	chr12:g.49033808C>A	Single base substitution	missense_variant KMT2D G3633C	1/412,0.24%	1/10188	MODERATE
00c0c1d5-0455-55ff-bb13-b9b9363b0f55	chr1:g.93576046G>C	Single base substitution	missense_variant BCAR3 H590Q	1/412,0.24%	1/10188	MODERATE
00c0ef4c-aaeb-579e-8635-8ee8e55194eb	chr14:g.56633049G>T	Single base substitution	missense_variant TMEM260 K534N	1/412,0.24%	1/10188	MODERATE
00c162ed-5dcb-5c7b-a6cb-face107fc527	chr4:g.41263285G>A	Single base substitution	missense_variant UCHL1 E174K	1/412,0.24%	1/10188	MODERATE
00c23d41-781f-5a43-8a93-26985e82c19f	chr3:g.169095225G>A	Single base substitution	missense_variant MECOM S769L	1/412,0.24%	1/10188	MODERATE
00c28415-188a-5514-99c0-8deeabd261c1	chr7:g.66797472G>A	Single base substitution	missense_variant RABGEF1 E246K	1/412,0.24%	1/10188	MODERATE
00c2ac40-a632-5a9d-93c6-50a843f03d9a	chr16:g.3090352C>T	Single base substitution	missense_variant ZSCAN10 R306H	1/412,0.24%	1/10188	MODERATE
00c32599-aa2a-54a6-b311-2a14fff69a04	chr19:g.36719480A>C	Single base substitution	missense_variant ZNF567 K252N	1/412,0.24%	1/10188	MODERATE
00c3880c-abe2-574b-9847-f5ab295f4b60	chr11:g.61134084C>G	Single base substitution	missense_variant VPS37C E73Q	1/412,0.24%	1/10188	MODERATE
00c3d46b-8136-5248-890f-8f0aef1d6461	chr21:g.10414882G>T	Single base substitution	non_coding_transcript_exon_variant BAGE2 None	1/412,0.24%	1/10188	MODIFIER
00c4b5a9-6774-5322-a922-098c1baada14	chr17:g.75757554G>A	Single base substitution	stop_retained_variant ITGB4 *1823*	1/412,0.24%	1/10188	LOW
00c539ed-a761-5363-be23-122143da36bf	chr17:g.44374340C>T	Single base substitution	intron_variant ITGA2B None	1/412,0.24%	1/10188	MODIFIER
00c64190-09b0-5fdc-98a1-7f643aa15acc	chr1:g.97306220T>G	Single base substitution	synonymous_variant DPYD P712P	1/412,0.24%	1/10188	LOW
00c64c9b-8b0a-547a-a3af-2f527f222fe4	chr6:g.142760587C>T	Single base substitution	missense_variant HIVEP2 E1901K	1/412,0.24%	2/10188	MODERATE
00c6d209-61bc-531a-b106-1fc16d045094	chr3:g.113013289G>A	Single base substitution	synonymous_variant C3orf17 C152C	1/412,0.24%	1/10188	LOW
00c739ff-2054-520a-b28c-89a4d684c0c6	chr1:g.248145948C>T	Single base substitution	synonymous_variant OR2M5 S267S	1/412,0.24%	2/10188	LOW
00c77b94-320d-52dc-99c8-b37423a8336b	chr15:g.57625791C>T	Single base substitution	stop_gained MYZAP Q142*	1/412,0.24%	1/10188	HIGH
00c7ce05-b9fb-53f0-9633-05e966f6c076	chr12:g.39309646G>C	Single base substitution	stop_gained KIF21A S1406*	1/412,0.24%	1/10188	HIGH
00c893c3-43f9-5ed6-83a1-204d40c31ed8	chr2:g.203138634G>C	Single base substitution	missense_variant NBEAL1 M1549I	1/412,0.24%	1/10188	MODERATE
00c8ca38-8afc-5e53-93a6-38ba2aea5ff6	chr1:g.110952576G>A	Single base substitution	missense_variant LRIF1 S103F	1/412,0.24%	1/10188	MODERATE
00c90095-6761-5afd-980e-1313f3ba4c05	chr2:g.167245937A>C	Single base substitution	missense_variant XIRP2 E1340D	1/412,0.24%	1/10188	MODERATE
00c955c3-f944-5d51-9876-561df9f9132c	chr3:g.52634687C>T	Single base substitution	missense_variant PBRM1 E406K	1/412,0.24%	1/10188	MODERATE
00c99562-8cef-5509-991c-873c830d6534	chr22:g.24324382C>T	Single base substitution	missense_variant SPECC1L R701C	1/412,0.24%	1/10188	MODERATE
00ca7549-c3f4-598a-a218-572d92ffb16d	chr12:g.41191511G>A	Single base substitution	synonymous_variant PDZRN4 L234L	1/412,0.24%	1/10188	LOW
00cace0a-38fc-5ca8-bb40-f3a37979d2ac	chr8:g.109490999C>T	Single base substitution	stop_gained PKHD1L1 R3338*	1/412,0.24%	2/10188	HIGH
00cb349f-ebab-517d-b2ca-54d1502626fd	chr20:g.37141167C>T	Single base substitution	missense_variant MROH8 E522K	1/412,0.24%	1/10188	MODERATE
00cba645-8d13-51be-8b64-4f78634a17b5	chr2:g.89143138C>A	Single base substitution	5_prime_UTR_variant IGKV3-20 None	1/412,0.24%	2/10188	MODIFIER
00cbecb4-6afc-5073-8d6d-b5ddc4166f01	chr10:g.63207542G>A	Single base substitution	missense_variant JMJD1C S1376L	1/412,0.24%	1/10188	MODERATE
00cdacb6-f9a8-5f61-a741-5438c4f3ea23	chr2:g.121457690C>G	Single base substitution	missense_variant CLASP1 R461T	1/412,0.24%	2/10188	MODERATE
00ce3f10-3638-53f8-9435-6eb5154ee560	chr2:g.54629594G>T	Single base substitution	synonymous_variant SPTBN1 V820V	1/412,0.24%	1/10188	LOW
00ce6023-559f-5716-9c09-9253eb9fd272	chr14:g.81192562T>C	Single base substitution	missense_variant GTF2A1 E297G	1/412,0.24%	1/10188	MODERATE
00ce7592-9bab-50fa-a72e-b0a495ed2cc8	chr18:g.50276998C>T	Single base substitution	missense_variant MBD1 A76T	1/412,0.24%	1/10188	MODERATE
00ce7fd8-8bd3-5b8a-9f4c-9129f6eb0522	chr11:g.61813312C>T	Single base substitution	synonymous_variant FADS1 K139K	1/412,0.24%	1/10188	LOW
00cf3da5-3f6d-5a36-be1d-d23e0b7e11a8	chr1:g.34758124G>C	Single base substitution	missense_variant GJB5 R265P	1/412,0.24%	1/10188	MODERATE
00d03ac6-75d3-59e3-8cdc-16cb5f6b023f	chr2:g.121460112C>G	Single base substitution	missense_variant CLASP1 R349T	1/412,0.24%	1/10188	MODERATE
00d094c2-15e1-5dfc-974d-4dac5c591b3a	chrX:g.45083483T>C	Single base substitution	missense_variant KDM6A L1103P	1/412,0.24%	1/10188	MODERATE
00d0b285-c948-5f90-987d-8c3d293b96db	chr2:g.121448989G>C	Single base substitution	stop_gained CLASP1 S552*	1/412,0.24%	1/10188	HIGH
00d0dbd0-f99e-5c79-a83c-8d7f26fd3c86	chr3:g.55888453C>T	Single base substitution	missense_variant ERC2 E834K	1/412,0.24%	1/10188	MODERATE
00d1646f-aaf1-5efc-b0f0-ad6d5f3fef32	chr11:g.95862316G>A	Single base substitution	synonymous_variant MTMR2 L105L	1/412,0.24%	1/10188	LOW
00d17733-6be4-5b04-9801-4eec59688ef3	chr2:g.197416853T>C	Single base substitution	missense_variant SF3B1 N185S	1/412,0.24%	2/10188	MODERATE
00d2582d-7cc9-5579-9276-60ee692be9cb	chr14:g.32822179G>A	Single base substitution	missense_variant AKAP6 E1456K	1/412,0.24%	1/10188	MODERATE
00d26d4e-490b-57e1-8f36-f3af5163c33e	chr15:g.75649430G>C	Single base substitution	missense_variant SNX33 E110Q	1/412,0.24%	2/10188	MODERATE
00d28cd1-86a8-5f70-8636-4d19670580fc	chr6:g.32117934C>A	Single base substitution	missense_variant ATF6B G450V	1/412,0.24%	1/10188	MODERATE
00d368af-052c-52d0-8c59-ee9f28d8b42f	chr17:g.10453722G>A	Single base substitution	missense_variant MYH4 S952L	1/412,0.24%	1/10188	MODERATE
00d394c2-f139-5bf4-b754-725e86a2bb96	chr2:g.36356472C>T	Single base substitution	synonymous_variant CRIM1 C60C	1/412,0.24%	1/10188	LOW
00d47ff7-83dc-5787-833f-f2ad5007912b	chr17:g.7675130G>A	Single base substitution	missense_variant TP53 A161V	1/412,0.24%	2/10188	MODERATE
00d4e42d-64bc-59ac-aebb-fbfab684dea2	chr15:g.52196464C>T	Single base substitution	missense_variant MYO5C E1614K	1/412,0.24%	1/10188	MODERATE
00d52abd-7345-5f18-b992-59308e4496a8	chr12:g.106999746G>T	Single base substitution	synonymous_variant CRY1 I314I	1/412,0.24%	1/10188	LOW
00d52f8b-f57a-5873-bb37-fdaddd45b8c3	chr19:g.50819159T>C	Single base substitution	3_prime_UTR_variant KLK1 None	1/412,0.24%	1/10188	MODIFIER
00d55cf6-acc3-559e-92d2-75f8fbf11ec4	chr1:g.36467235C>T	Single base substitution	missense_variant CSF3R E679K	1/412,0.24%	1/10188	MODERATE
00d68265-5f6f-591d-b9fe-b648c53b6c7e	chr22:g.42213611C>T	Single base substitution	synonymous_variant TCF20 Q565Q	1/412,0.24%	1/10188	LOW
00d6e548-92f5-5388-8305-300315dd0fe8	chr7:g.151076338G>A	Single base substitution	missense_variant SLC4A2 E1233K	1/412,0.24%	2/10188	MODERATE
00d71b37-bc72-5833-a1c7-d550ecb148fa	chr17:g.74440769G>A	Single base substitution	synonymous_variant GPRC5C Q376Q	1/412,0.24%	1/10188	LOW
00d751a3-ac86-5728-bbec-befbb2f8d2d9	chr13:g.95757689C>T	Single base substitution	stop_gained DNAJC3 Q147*	1/412,0.24%	1/10188	HIGH
00d7c72b-2f08-51d0-ae05-25722773ea18	chr9:g.37955962G>C	Single base substitution	missense_variant SHB P383A	1/412,0.24%	1/10188	MODERATE
00d7e8a8-c96b-57a7-b1ee-4d7114a31d9d	chr19:g.52765580C>T	Single base substitution	3_prime_UTR_variant ZNF600 None	1/412,0.24%	1/10188	MODIFIER
00d8e8ab-2d05-5379-a0b2-ab86112a3113	chr6:g.36470254G>A	Single base substitution	missense_variant KCTD20 E53K	1/412,0.24%	1/10188	MODERATE
00d930cc-22f1-5e86-8278-ef0041c5dcc4	chr5:g.140877578C>A	Single base substitution	synonymous_variant PCDHA12 I702I	1/412,0.24%	1/10188	LOW
00d9bf3e-f65c-5a80-8485-c5e6962f4858	chr3:g.124694390G>A	Single base substitution	downstream_gene_variant AC080008.1 None	1/412,0.24%	1/10188	MODIFIER
00da51fc-56f5-50a8-95fb-0fd16eee2b9d	chr2:g.25753595C>G	Single base substitution	missense_variant ASXL2 E361Q	1/412,0.24%	1/10188	MODERATE
00db6a08-24e8-58bd-bf94-ef705ed2c7cf	chr1:g.178439573G>A	Single base substitution	missense_variant RASAL2 E128K	1/412,0.24%	1/10188	MODERATE
00db8650-9d45-5d8b-93d8-dfc65fd159e2	chr2:g.118108354G>C	Single base substitution	3_prime_UTR_variant INSIG2 None	1/412,0.24%	1/10188	MODIFIER
00dbb962-0992-5656-adfe-586931dc89ec	chr3:g.15470576T>A	Single base substitution	missense_variant COLQ H226L	1/412,0.24%	1/10188	MODERATE
00dc05c3-00c6-5e5e-9974-b13504cf0efd	chr3:g.122109295A>G	Single base substitution	missense_variant CD86 H245R	1/412,0.24%	1/10188	MODERATE
00dcb301-9c17-5b85-862f-5c22e7b8dbe0	chr3:g.183985465G>A	Single base substitution	intron_variant ABCC5 None	1/412,0.24%	1/10188	MODIFIER
00dd5680-8b7f-5ede-ae60-18049af107b2	chr5:g.83539946G>A	Single base substitution	missense_variant VCAN V2315I	1/412,0.24%	1/10188	MODERATE
00dd97d1-aa27-5a18-9c90-db8a49337420	chr7:g.103697981A>G	Single base substitution	missense_variant RELN Y339H	1/412,0.24%	1/10188	MODERATE
00ddb246-6871-58a5-9c14-1c064d84c116	chr19:g.18598573C>T	Single base substitution	missense_variant CRLF1 E186K	1/412,0.24%	1/10188	MODERATE
00ddb738-7a05-5758-846a-b4d20689590b	chr7:g.103195592C>G	Single base substitution	non_coding_transcript_exon_variant DPY19L2P2 None	1/412,0.24%	1/10188	MODIFIER
00ddd92e-f174-538d-8305-9832abf936f4	chr6:g.152381225C>T	Single base substitution	stop_gained SYNE1 W2930*	1/412,0.24%	1/10188	HIGH
00dddee3-85f1-5359-b989-ddb913e1fbd7	chr3:g.147410875C>A	Single base substitution	missense_variant ZIC1 H255N	1/412,0.24%	1/10188	MODERATE
00de2af4-ae45-57fd-8b86-127fd3a1c9eb	chr3:g.42914557G>C	Single base substitution	missense_variant ZNF662 E162Q	1/412,0.24%	1/10188	MODERATE
00de9fad-f4e4-5dd5-98a2-e0265c2722ee	chr7:g.103119675_103119676insA	Small insertion	frameshift_variant NAPEPLD A282Rfs*11	1/412,0.24%	1/10188	HIGH
00deab9a-64fd-52cd-8dd8-cc2923acabf4	chr11:g.65871245G>A	Single base substitution	synonymous_variant EFEMP2 G93G	1/412,0.24%	1/10188	LOW
00dfcea5-49f5-5fc4-96fc-06f3ac80b4f1	chr6:g.142772636C>G	Single base substitution	missense_variant HIVEP2 K701N	1/412,0.24%	1/10188	MODERATE
00e01eb0-5cf7-5dc5-abc1-bc76625ae9fa	chr11:g.56490738G>A	Single base substitution	synonymous_variant OR5M8 F211F	1/412,0.24%	1/10188	LOW
00e023ea-fa04-5dcf-8f32-15195cded0f7	chr4:g.72305996G>T	Single base substitution	missense_variant ADAMTS3 H751N	1/412,0.24%	1/10188	MODERATE
00e154ba-f1f9-5b09-86e7-a20093809fe4	chr8:g.124589693C>G	Single base substitution	synonymous_variant MTSS1 L104L	1/412,0.24%	1/10188	LOW
00e1863d-57dc-5820-86bb-64820ef2e98c	chr2:g.60461157G>A	Single base substitution	synonymous_variant BCL11A C585C	1/412,0.24%	1/10188	LOW
00e1983c-4c6f-57a3-8168-1354ae01e591	chr17:g.63355129C>T	Single base substitution	missense_variant TANC2 S700F	1/412,0.24%	1/10188	MODERATE
00e19ae5-43bd-5245-b41d-ce6de88485f4	chr12:g.93411269G>A	Single base substitution	missense_variant UBE2N P21S	1/412,0.24%	2/10188	MODERATE
00e22773-2e15-5bb0-ba3f-4a19d91ae462	chr5:g.112839427C>T	Single base substitution	missense_variant APC S1278L	1/412,0.24%	1/10188	MODERATE
00e25dfa-1126-5325-ba8a-f23e1cc9580e	chr17:g.41440777C>T	Single base substitution	missense_variant KRT38 V49M	1/412,0.24%	1/10188	MODERATE
00e2e138-f63c-50a5-845c-adfee5fdcacb	chr15:g.40853892G>A	Single base substitution	synonymous_variant SPINT1 L308L	1/412,0.24%	1/10188	LOW
00e329e7-7ab4-526d-9ab7-c17ba7b1921b	chr6:g.89938158C>T	Single base substitution	missense_variant BACH2 E677K	1/412,0.24%	1/10188	MODERATE
00e356c3-8c99-5a35-9a39-539de542bcb4	chr6:g.160069953G>C	Single base substitution	missense_variant IGF2R W1446C	1/412,0.24%	1/10188	MODERATE
00e359f9-ffff-5d0e-8adc-297d089801d2	chr1:g.214637903C>G	Single base substitution	missense_variant CENPF S495C	1/412,0.24%	1/10188	MODERATE
00e3a378-6e58-51ce-b4c1-368e2ec97f1b	chr3:g.75741794C>G	Single base substitution	intron_variant ZNF717 None	1/412,0.24%	1/10188	MODIFIER
00e3bc57-27ad-5f96-8c41-2cfa070c3a74	chr3:g.151394837C>T	Single base substitution	synonymous_variant MED12L L1895L	1/412,0.24%	1/10188	LOW
00e3d520-3bf0-5e6c-9a52-c52be1505fdf	chr17:g.48997684C>T	Single base substitution	5_prime_UTR_variant IGF2BP1 None	1/412,0.24%	1/10188	MODIFIER
00e45575-e063-51f7-838d-b10a7b305ac6	chr1:g.149971081G>A	Single base substitution	stop_gained OTUD7B Q86*	1/412,0.24%	1/10188	HIGH
00e45fa8-6750-5ec7-be4f-0c05e58feb99	chr8:g.72937521T>C	Single base substitution	synonymous_variant KCNB2 N722N	1/412,0.24%	1/10188	LOW
00e580ee-d426-58c9-8cdb-ccf7f11eb5d3	chr8:g.100287784C>T	Single base substitution	missense_variant RNF19A E131K	1/412,0.24%	1/10188	MODERATE
00e5d1e0-5b03-5f62-b16a-0a45bf22d664	chr5:g.140705755G>A	Single base substitution	stop_retained_variant ZMAT2 *200*	1/412,0.24%	1/10188	LOW
00e5fb82-0d6d-5349-8cac-8bd680beeacd	chr4:g.185407968C>T	Single base substitution	synonymous_variant UFSP2 L363L	1/412,0.24%	1/10188	LOW
00e68fd9-28f8-5671-9e12-65d0a2b1b9f3	chr13:g.32340038G>A	Single base substitution	missense_variant BRCA2 E1895K	1/412,0.24%	1/10188	MODERATE
00e692c4-b335-5717-8365-62832cf41a5b	chr1:g.236178599C>T	Single base substitution	missense_variant GPR137B S217F	1/412,0.24%	2/10188	MODERATE
00e71f53-0dc1-5a43-bf23-5f06394f770c	chr19:g.17720941C>T	Single base substitution	missense_variant MAP1S R42W	1/412,0.24%	1/10188	MODERATE
00e7639d-262d-5484-94b5-78185a062f59	chr6:g.34887810C>T	Single base substitution	missense_variant TAF11 E50K	1/412,0.24%	2/10188	MODERATE
00e7e95e-938a-5594-aeb2-e0f11c7f5ac6	chr2:g.189010178G>C	Single base substitution	missense_variant COL3A1 G1275A	1/412,0.24%	1/10188	MODERATE
00e91a03-7005-5cf6-8c35-5076a7338e0b	chr2:g.112738921G>A	Single base substitution	missense_variant CKAP2L L714F	1/412,0.24%	1/10188	MODERATE
00e91b74-ac1e-52d6-a7e0-85d17ff0dd2d	chr17:g.30899270delTC	Small deletion	frameshift_variant TEFM Q327Hfs*6	1/412,0.24%	1/10188	HIGH
00e951d2-291d-5f31-8a84-18b853322850	chr12:g.6941430C>G	Single base substitution	missense_variant ATN1 Q1139E	1/412,0.24%	1/10188	MODERATE
00ea395a-1203-5b12-bc8d-3c7166ce69fd	chr3:g.121539543delCTGCCCA	Small deletion	frameshift_variant POLQ M172Tfs*24	1/412,0.24%	1/10188	HIGH
00eb2674-206c-576f-adc5-dac4334dec59	chr13:g.52461561A>G	Single base substitution	synonymous_variant CKAP2 T246T	1/412,0.24%	1/10188	LOW
00eb6145-e02b-530e-a443-e19f95b13bbc	chr12:g.64694794delATTTCTTGCG	Small deletion	frameshift_variant RASSF3 N200Tfs*14	1/412,0.24%	1/10188	HIGH
00eb897a-874e-5464-9060-d4949102128a	chr12:g.98547910G>C	Single base substitution	3_prime_UTR_variant TMPO None	1/412,0.24%	1/10188	MODIFIER
00ebfa7b-532b-53b9-a4e9-0a327d095b12	chr3:g.196508313C>A	Single base substitution	missense_variant SMCO1 L73F	1/412,0.24%	1/10188	MODERATE
00ece74f-85a4-5d31-9c30-d23d8c6936b0	chr12:g.102153930C>G	Single base substitution	missense_variant PARPBP S150C	1/412,0.24%	1/10188	MODERATE
00ed679f-8d8e-589c-bbb5-0cc9f936f0e7	chr7:g.101173398C>T	Single base substitution	synonymous_variant NAT16 Q145Q	1/412,0.24%	1/10188	LOW
00ed747b-f8f5-52c1-8dcc-6ea13dd493d4	chr7:g.150720863C>G	Single base substitution	missense_variant GIMAP1 L287V	1/412,0.24%	1/10188	MODERATE
00edca3c-6ccc-5411-8d49-e31d214139a5	chr13:g.87677141G>A	Single base substitution	missense_variant SLITRK5 V585I	1/412,0.24%	1/10188	MODERATE
00f018e6-6d2e-51d6-bce7-25be5b064c7c	chrX:g.153981955G>A	Single base substitution	5_prime_UTR_variant TMEM187 None	1/412,0.24%	1/10188	MODIFIER
00f0f910-71b9-509f-b5ab-5c1581b5ad66	chr11:g.103177743A>T	Single base substitution	missense_variant DYNC2H1 H2021L	1/412,0.24%	1/10188	MODERATE
00f1390d-3249-5b24-980b-315f3e523cd8	chr12:g.11890979_11890980insA	Small insertion	frameshift_variant ETV6 D432Rfs*13	1/412,0.24%	1/10188	HIGH
00f1686a-996a-55da-b502-a5e92b647fb3	chr21:g.44579983C>A	Single base substitution	missense_variant KRTAP10-5 C199F	1/412,0.24%	1/10188	MODERATE
00f1cffb-e7b3-5589-80fe-10eea6535e6e	chr2:g.94853277A>G	Single base substitution	non_coding_transcript_exon_variant ANKRD20A8P None	1/412,0.24%	1/10188	MODIFIER
00f20de1-3f0a-51b0-9644-d4287315a64f	chr5:g.177604539C>T	Single base substitution	splice_region_variant B4GALT7 F137F	1/412,0.24%	1/10188	LOW
00f28713-37ec-51f1-933d-66ae77ad2c03	chr16:g.2528323G>C	Single base substitution	missense_variant AMDHD2 D269H	1/412,0.24%	1/10188	MODERATE
00f2b9d1-9d48-59ff-961e-b6ae1bc4faf7	chr1:g.114625276_114625277insT	Small insertion	frameshift_variant DENND2C Y237Ifs*3	1/412,0.24%	2/10188	HIGH
00f4fb85-a02e-5d45-84f7-8b374cbdf2d7	chr5:g.141485761delG	Small deletion	frameshift_variant PCDHGC4 E197Rfs*16	1/412,0.24%	1/10188	HIGH
00f5963e-db04-57e0-94f8-9cb88441a264	chr3:g.179583443C>T	Single base substitution	missense_variant ACTL6A P373S	1/412,0.24%	1/10188	MODERATE
00f7aa6a-eb83-56d2-8ac4-af05cd288899	chr7:g.151040534G>C	Single base substitution	missense_variant ABCB8 E447Q	1/412,0.24%	1/10188	MODERATE
00f7ceae-2838-57ce-9a26-0b14143f0bb5	chr6:g.31202629G>C	Single base substitution	missense_variant HCG27 D128H	1/412,0.24%	1/10188	MODERATE
00f93890-f8a8-5ded-b803-42a8c08fe608	chr20:g.46070236C>T	Single base substitution	missense_variant NCOA5 M113I	1/412,0.24%	1/10188	MODERATE
00f958b1-6c88-5935-bb5e-6b7128857a78	chr5:g.79729374G>A	Single base substitution	synonymous_variant CMYA5 P203P	1/412,0.24%	1/10188	LOW
00fa1dc9-7358-5748-8274-07defd762e7f	chr10:g.11931707C>T	Single base substitution	missense_variant UPF2 E1208K	1/412,0.24%	1/10188	MODERATE
00fa9803-fe57-5f07-b33e-ff1c0c11df67	chr1:g.51790977C>T	Single base substitution	missense_variant NRD1 D1060N	1/412,0.24%	2/10188	MODERATE
00fb0e52-ca3d-50b4-8c44-faf344c1d9e2	chr22:g.19972826G>A	Single base substitution	missense_variant ARVCF S851L	1/412,0.24%	1/10188	MODERATE
00fbed80-aa8f-58bb-8de3-5894c039d3ca	chr3:g.158645657C>T	Single base substitution	missense_variant GFM1 S37L	1/412,0.24%	1/10188	MODERATE
00fc3361-c18e-5587-8e44-c6023da22f27	chr9:g.35752114C>T	Single base substitution	synonymous_variant RGP1 L307L	1/412,0.24%	2/10188	LOW
00fdf6c5-754c-5b15-93a1-442dba8af3fb	chr20:g.41204364G>C	Single base substitution	missense_variant ZHX3 P185A	1/412,0.24%	1/10188	MODERATE
00fe9cc4-1079-5b54-88e1-f5c44f1e8c09	chr9:g.34993320G>A	Single base substitution	synonymous_variant DNAJB5 L29L	1/412,0.24%	1/10188	LOW
00ff4d43-d867-5ac0-8213-23b423bf40a9	chr2:g.156325927G>A	Single base substitution	synonymous_variant NR4A2 H538H	1/412,0.24%	4/10188	LOW
00ff88b8-0ae4-5276-930d-0eb2f9610fb4	chr2:g.44321415C>G	Single base substitution	missense_variant PREPL E709Q	1/412,0.24%	1/10188	MODERATE
00ff9453-0555-5648-9ad8-1cd8b2467934	chr6:g.27838828C>T	Single base substitution	missense_variant HIST1H2BN S56L	1/412,0.24%	2/10188	MODERATE
00ffaf39-b52c-55b2-ad31-c293d409c545	chr2:g.167243646C>G	Single base substitution	missense_variant XIRP2 L577V	1/412,0.24%	1/10188	MODERATE
00fff65d-4a3a-5712-9985-d1263c62d971	chr19:g.38304253C>G	Single base substitution	5_prime_UTR_variant C19orf33 None	1/412,0.24%	1/10188	MODIFIER
01000b37-c65a-587d-83e1-f2af88d64fb1	chr3:g.195757200C>G	Single base substitution	missense_variant MUC4 E5039Q	1/412,0.24%	1/10188	MODERATE
0101c84d-7874-52c2-96f0-bc1d1597666d	chr1:g.154246208G>A	Single base substitution	missense_variant UBAP2L D283N	1/412,0.24%	1/10188	MODERATE
0101e4af-bec3-5205-a8b8-be4562287e0d	chr9:g.131939446C>T	Single base substitution	missense_variant MED27 D170N	1/412,0.24%	1/10188	MODERATE
01020870-43b7-542b-b4dd-98f6e5ba4aec	chr1:g.161040830C>A	Single base substitution	missense_variant USF1 R201S	1/412,0.24%	1/10188	MODERATE
01022059-66e5-517e-b8f8-eba603033725	chr3:g.10338234C>T	Single base substitution	missense_variant ATP2B2 R1121Q	1/412,0.24%	1/10188	MODERATE
01033a35-9f57-5a39-b73b-0dbe621bdb97	chr17:g.50862881delC	Small deletion	downstream_gene_variant TOB1 None	1/412,0.24%	1/10188	MODIFIER
01034f87-254f-5070-a66c-66ae151a3055	chr2:g.102508919G>C	Single base substitution	missense_variant SLC9A4 E492Q	1/412,0.24%	1/10188	MODERATE
01038fbb-5649-50af-b9a9-27993df68f74	chr13:g.113355464T>C	Single base substitution	missense_variant GRTP1 K67E	1/412,0.24%	1/10188	MODERATE
01039fac-6086-502d-ba09-4f0776a7353d	chr6:g.136181289G>C	Single base substitution	missense_variant PDE7B W337C	1/412,0.24%	1/10188	MODERATE
0103b8d2-c947-52a3-90e9-7fe8695e7652	chr1:g.248362061C>A	Single base substitution	missense_variant OR2T4 P161T	1/412,0.24%	2/10188	MODERATE
0103d0be-c505-5321-92c5-9df5a1cca1a7	chr9:g.131192289C>T	Single base substitution	missense_variant NUP214 S1219L	1/412,0.24%	1/10188	MODERATE
010467b8-ca6a-5b0b-99c5-502c95cb6fd0	chr12:g.49051387C>T	Single base substitution	missense_variant KMT2D E766K	1/412,0.24%	1/10188	MODERATE
01049d45-ad02-54dd-a0bf-6341ede55416	chr5:g.139051005G>A	Single base substitution	stop_gained SIL1 Q96*	1/412,0.24%	1/10188	HIGH
01050b06-0234-58f6-bc9b-51d4561cb732	chr6:g.26250595G>C	Single base substitution	missense_variant HIST1H3F T4R	1/412,0.24%	1/10188	MODERATE
01051bed-ed11-5cd5-b4f5-ef3295e85304	chr2:g.71350268G>A	Single base substitution	synonymous_variant ZNF638 L438L	1/412,0.24%	1/10188	LOW
01052551-f3fa-5c84-b8f8-0f7866db2ad5	chr2:g.27493471G>A	Single base substitution	synonymous_variant FNDC4 I154I	1/412,0.24%	1/10188	LOW
01054147-3350-53db-bb2b-856f1d123a5e	chr1:g.150648484G>C	Single base substitution	missense_variant GOLPH3L S232C	1/412,0.24%	1/10188	MODERATE
010584ad-d62e-50e6-97ed-a5fe285657cc	chr5:g.96398975C>G	Single base substitution	missense_variant PCSK1 E498Q	1/412,0.24%	1/10188	MODERATE
0105afc5-55f8-59cc-ae7e-b299961ebea8	chr17:g.66877418G>C	Single base substitution	missense_variant CACNG5 S29T	1/412,0.24%	1/10188	MODERATE
0105b015-0ab1-5147-9a42-5a4cd18ebd2f	chr3:g.49284063C>G	Single base substitution	missense_variant USP4 V822L	1/412,0.24%	1/10188	MODERATE
0105c53c-d64d-56dd-8c5b-155c7e7f2009	chr2:g.33134868G>C	Single base substitution	missense_variant LTBP1 C370S	1/412,0.24%	1/10188	MODERATE
01067b33-0063-5877-88a1-52c1fdc5f295	chr12:g.122508259C>G	Single base substitution	missense_variant RSRC2 E332Q	1/412,0.24%	1/10188	MODERATE
01069827-fb8f-5d1c-9062-fa5cbfb577c8	chr3:g.96987845T>C	Single base substitution	synonymous_variant EPHA6 S322S	1/412,0.24%	1/10188	LOW
0108026f-0615-5326-8f63-e05a29715842	chr19:g.57158357C>T	Single base substitution	missense_variant DUXA E137K	1/412,0.24%	1/10188	MODERATE
01086815-7046-55fa-bf35-a428754b80d4	chr20:g.63862283T>C	Single base substitution	missense_variant ABHD16B V248A	1/412,0.24%	1/10188	MODERATE
01086933-7398-5df1-be6d-0e5d7427d7e4	chr22:g.36496207T>G	Single base substitution	missense_variant FOXRED2 N462H	1/412,0.24%	1/10188	MODERATE
0108cefb-fd67-580f-a2dc-6dadded2ece1	chr18:g.45879058C>T	Single base substitution	missense_variant EPG5 E1942K	1/412,0.24%	1/10188	MODERATE
0108f108-d0a0-5018-a5fe-639edfe8db61	chr3:g.49211805A>T	Single base substitution	stop_gained CCDC36 K9*	1/412,0.24%	1/10188	HIGH
010a1fdf-64e0-5dec-a547-3a193e0a956f	chr13:g.18840002T>C	Single base substitution	non_coding_transcript_exon_variant ANKRD20A9P None	1/412,0.24%	1/10188	MODIFIER
010abd4e-233a-5361-beb9-3f22aa281176	chr6:g.44254598G>A	Single base substitution	3_prime_UTR_variant SLC35B2 None	1/412,0.24%	1/10188	MODIFIER
010af6d7-cf47-53fb-9205-1b6d4d207386	chr22:g.23884781A>G	Single base substitution	missense_variant SLC2A11 N475D	1/412,0.24%	1/10188	MODERATE
010b4609-159e-5666-b40a-19ec0ca92c56	chr19:g.46312326C>T	Single base substitution	intron_variant HIF3A None	1/412,0.24%	1/10188	MODIFIER
010bf20f-4a67-58ab-911b-fc29ca4bfa6f	chr3:g.49718466C>T	Single base substitution	missense_variant AMIGO3 D334N	1/412,0.24%	3/10188	MODERATE
010c6385-cf16-5c87-8106-e84c702551e7	chr19:g.50379830C>G	Single base substitution	missense_variant NR1H2 I326M	1/412,0.24%	1/10188	MODERATE
010c64d7-7138-5035-86d6-c79089187c22	chr1:g.161791481C>T	Single base substitution	missense_variant ATF6 S143F	1/412,0.24%	1/10188	MODERATE
010c726a-dd6e-522b-9eef-c56089602608	chrX:g.48808298A>G	Single base substitution	missense_variant HDAC6 T260A	1/412,0.24%	1/10188	MODERATE
010ccf79-8761-5367-90f0-07c7071a357f	chr14:g.21724188C>T	Single base substitution	synonymous_variant TRAV3 I70I	1/412,0.24%	1/10188	LOW
010d0d7c-e951-55ca-a286-62922aa212e0	chr7:g.45102472G>A	Single base substitution	missense_variant TBRG4 S399L	1/412,0.24%	1/10188	MODERATE
010d4363-0154-5006-896b-1211f246ae45	chr19:g.42593541G>A	Single base substitution	missense_variant CEACAM8 P142S	1/412,0.24%	2/10188	MODERATE
010d9f70-9d15-550b-b0c6-0ab521e0ef9f	chr3:g.35681758G>C	Single base substitution	missense_variant ARPP21 E3Q	1/412,0.24%	1/10188	MODERATE
010db9ce-9e92-5f7e-9746-6d479009d43c	chr8:g.76706097C>T	Single base substitution	missense_variant ZFHX4 P670L	1/412,0.24%	2/10188	MODERATE
010e028f-fc50-5e53-997f-a1e6aa5e7965	chr5:g.181154946G>C	Single base substitution	missense_variant OR2V2 E2Q	1/412,0.24%	1/10188	MODERATE
010e4628-80d9-56c8-b2aa-474d00e8c185	chr16:g.51137182C>T	Single base substitution	missense_variant SALL1 S1302N	1/412,0.24%	1/10188	MODERATE
010e46a2-fd11-533e-8a9b-7aad86f12aa4	chr16:g.87644775C>T	Single base substitution	synonymous_variant JPH3 F300F	1/412,0.24%	2/10188	LOW
010e6b09-2a7b-512e-a55d-52870a84582f	chr11:g.120986176G>A	Single base substitution	synonymous_variant GRIK4 Q929Q	1/412,0.24%	1/10188	LOW
010e785b-366d-5be0-a628-98611023c259	chr8:g.42472381C>G	Single base substitution	missense_variant SLC20A2 D4H	1/412,0.24%	1/10188	MODERATE
010ecca0-d42a-56cf-8194-d2c62a42decb	chr1:g.62841536G>A	Single base substitution	missense_variant ATG4C E400K	1/412,0.24%	1/10188	MODERATE
010edfed-9587-5ba7-aa8a-28b948a75eca	chr22:g.22358130G>A	Single base substitution	missense_variant IGLV1-47 R74Q	1/412,0.24%	1/10188	MODERATE
010f03fd-a385-5d67-ae95-0d6686d8a4dd	chr8:g.141441230C>T	Single base substitution	synonymous_variant MROH5 Q996Q	1/412,0.24%	1/10188	LOW
01110586-c983-5513-b1e9-83cf866b86e9	chr20:g.31406140G>T	Single base substitution	missense_variant DEFB121 L5I	1/412,0.24%	1/10188	MODERATE
01113656-42a9-564e-89f1-4e2a05422077	chr8:g.19954129C>T	Single base substitution	missense_variant LPL P184L	1/412,0.24%	1/10188	MODERATE
0111a717-a9e1-5438-8655-5679bdd4d6a8	chr14:g.74358399C>T	Single base substitution	missense_variant VRTN S539F	1/412,0.24%	1/10188	MODERATE
0111ccf5-26aa-516b-aea0-2bb3c74ad45c	chr4:g.183319529G>A	Single base substitution	3_prime_UTR_variant WWC2 None	1/412,0.24%	1/10188	MODIFIER
0111e2c7-19f4-53a1-819d-0a53448ae3d9	chr9:g.28863670A>T	Single base substitution	non_coding_transcript_exon_variant MIR876 None	1/412,0.24%	1/10188	MODIFIER
0111f532-ff13-53eb-a353-70849a62b71b	chr8:g.41694762G>A	Single base substitution	stop_gained ANK1 R1053*	1/412,0.24%	1/10188	HIGH
01124d1f-a447-59da-8037-c290df561ccd	chr5:g.140875551G>T	Single base substitution	missense_variant PCDHA12 G27W	1/412,0.24%	1/10188	MODERATE
01137b7f-7a85-5e09-acef-e8d033906fac	chr7:g.36423930delACTACATTTACTCTGTAAGTAAATCAGGCTTTTGATGATTCGA	Small deletion	splice_donor_variant ANLN X864_splice	1/412,0.24%	1/10188	HIGH
0115b503-ff26-511a-ac6f-67e9c280da2b	chr12:g.113108202G>A	Single base substitution	synonymous_variant RASAL1 I465I	1/412,0.24%	1/10188	LOW
0116573d-e4c0-5e31-8b8d-409ef8e50491	chr10:g.4999234A>G	Single base substitution	missense_variant AKR1C2 L138P	1/412,0.24%	1/10188	MODERATE
0116e26f-0a59-59ec-aef5-3655bfce16b3	chr8:g.60781183A>G	Single base substitution	missense_variant CHD7 K617E	1/412,0.24%	1/10188	MODERATE
0117e7e2-d1e7-51ad-b5e3-faf7782eee64	chr4:g.108742349C>T	Single base substitution	3_prime_UTR_variant ETNPPL None	1/412,0.24%	1/10188	MODIFIER
0118424a-6ab0-5ae8-9b7f-04ffe1143447	chr10:g.94546469C>G	Single base substitution	missense_variant HELLS L42V	1/412,0.24%	1/10188	MODERATE
01191081-3a89-5ecf-adac-ecd4f163021a	chr10:g.1103706C>T	Single base substitution	synonymous_variant WDR37 L277L	1/412,0.24%	1/10188	LOW
011973cc-f4ac-5572-a0a6-4e88a63b9bc4	chr11:g.47243050G>C	Single base substitution	missense_variant ACP2 C310W	1/412,0.24%	1/10188	MODERATE
0119d484-0a39-5c92-b1e0-3b782d2d6a39	chr11:g.57335065C>T	Single base substitution	splice_region_variant SSRP1 None	1/412,0.24%	1/10188	LOW
[truncated: 3,000 more rows]

## Sheet: BRCA
92b75ae1-8d4d-52c2-8658-9c981eef0e57	chr3:g.179234297A>G	Single base substitution	missense_variant PIK3CA H1047R	121/986,12.27%	234/10188	MODERATE
a34dbc69-77ad-5c45-9c4b-e26ea62bde83	chr3:g.179218303G>A	Single base substitution	missense_variant PIK3CA E545K	63/986,6.39%	258/10188	MODERATE
31df4cc1-3220-53c9-97a0-e926dd3f982b	chr3:g.179218294G>A	Single base substitution	missense_variant PIK3CA E542K	43/986,4.36%	167/10188	MODERATE
1e745f6b-3e06-5fc8-aab0-afe3246fe5a9	chr1:g.76576946_76576947insAAAC	Small insertion	intron_variant ST6GALNAC3 None	33/986,3.35%	75/10188	MODIFIER
ab96fb54-dfc0-58d9-b727-20a857d58dad	chr14:g.104780214C>T	Single base substitution	missense_variant AKT1 E17K	25/986,2.54%	53/10188	MODERATE
44c3cab3-c04e-5df6-831f-b2a963e90092	chr10:g.8069470delCA	Small deletion	splice_acceptor_variant GATA3 X308_splice	21/986,2.13%	21/10188	HIGH
606bcc74-5539-5933-bb00-f4c662cc9d62	chr3:g.195783009C>T	Single base substitution	synonymous_variant MUC4 V2857V	21/986,2.13%	57/10188	LOW
8ca11534-202e-53e2-ac48-8e593a4833f6	chr3:g.195783008A>G	Single base substitution	missense_variant MUC4 S2858P	20/986,2.03%	59/10188	MODERATE
8e30604f-3a45-5533-bdd7-0a4353700318	chr17:g.7675088C>T	Single base substitution	missense_variant TP53 R175H	20/986,2.03%	156/10188	MODERATE
0c29af1d-5156-5b1a-9723-cf1e943289b5	chr3:g.179203765T>A	Single base substitution	missense_variant PIK3CA N345K	17/986,1.72%	34/10188	MODERATE
80b20211-fdad-54b7-b2e5-2f2b62bef094	chr15:g.20535018C>T	Single base substitution	missense_variant GOLGA6L6 M472I	17/986,1.72%	43/10188	MODERATE
49cd6bd5-4e65-5ae7-ba2b-36d2dbe4d64e	chr3:g.179234297A>T	Single base substitution	missense_variant PIK3CA H1047L	13/986,1.32%	37/10188	MODERATE
e4b5b3b0-9deb-5355-8a42-610890b7a08e	chr6:g.154107953delTTTTTA	Small deletion	intron_variant OPRM1 None	13/986,1.32%	35/10188	MODIFIER
b5249474-20f8-5245-8dc0-c548405baaa2	chr17:g.7673802C>T	Single base substitution	missense_variant TP53 R273H	12/986,1.22%	99/10188	MODERATE
0cf877d0-6109-51b6-b9c1-d3ef47483b57	chr16:g.15104542T>A	Single base substitution	downstream_gene_variant PKD1P6 None	11/986,1.12%	29/10188	MODIFIER
d84fa526-0940-5676-be5d-c199036dbb1d	chr1:g.146963189G>C	Single base substitution	missense_variant NBPF12 E125Q	11/986,1.12%	20/10188	MODERATE
660242b4-4065-5c38-bb41-6d252d08252e	chr3:g.195778903G>T	Single base substitution	missense_variant MUC4 P4226H	10/986,1.01%	34/10188	MODERATE
bb12643c-d1c1-5cc4-aa5b-ad0591017651	chr3:g.195781031_195781032insACCGGTGGATGCCGAGGAAGCGTCGGTGACAGGAAGAGGGGTGGTGTCACCTGTGGATACTGAGGAAAAGCTGGTGACAGGAAGAGGGGTGGCGTGACCTGTGGATACTGAGGAAGTGTCGGTGACAGGAAGAGTCGTGGTGTC	Small insertion	inframe_insertion MUC4 G3516_H3517insDTTTLPVTDTSSVSTGHATPLPVTSFSSVSTGDTTPLPVTDASSASTG	10/986,1.01%	45/10188	MODERATE
e10d2735-2ab6-50ad-a157-b1f71a395fb5	chr2:g.197402110T>C	Single base substitution	missense_variant SF3B1 K700E	10/986,1.01%	16/10188	MODERATE
0474bc44-4d7d-5a4f-ad12-c13d999e75ee	chr3:g.195780140G>A	Single base substitution	missense_variant MUC4 L3814F	9/986,0.91%	40/10188	MODERATE
0d41f60d-0b9f-5aab-9507-374edfcaff0c	chr6:g.26217357A>T	Single base substitution	missense_variant HIST1H2AE K128M	9/986,0.91%	21/10188	MODERATE
4f1c6a67-ab75-5bd8-9715-ab01549298d8	chr3:g.179221146G>A	Single base substitution	missense_variant PIK3CA E726K	9/986,0.91%	30/10188	MODERATE
610da34b-7729-5876-ae07-771c4b692d76	chr15:g.22465692G>A	Single base substitution	missense_variant GOLGA6L22 V434M	9/986,0.91%	33/10188	MODERATE
cb2dd30a-bd00-5381-9674-f3ba5be304e1	chr16:g.68738315C>T	Single base substitution	stop_gained CDH1 Q23*	9/986,0.91%	9/10188	HIGH
e047a0d4-3887-5405-b3e8-c6aa41de7da7	chr11:g.1097377T>C	Single base substitution	non_coding_transcript_exon_variant MUC2 None	9/986,0.91%	23/10188	MODIFIER
0ea49e01-f6a9-590d-a8f5-9b3caffbd9f1	chrX:g.107603209C>G	Single base substitution	missense_variant FRMPD3 Q1757E	8/986,0.81%	11/10188	MODERATE
195f0930-8b30-51d3-9d57-06bbbf0408d5	chr10:g.8069550_8069551insG	Small insertion	frameshift_variant GATA3 D335Gfs*17	8/986,0.81%	8/10188	HIGH
288a8e0d-059a-520c-b457-fc8464e68154	chr17:g.7674945G>A	Single base substitution	stop_gained TP53 R196*	8/986,0.81%	52/10188	HIGH
4955eccf-42ea-5b51-859d-a3722d67a913	chr11:g.1097397C>T	Single base substitution	non_coding_transcript_exon_variant MUC2 None	8/986,0.81%	25/10188	MODIFIER
d75fa958-f2a4-5a54-8d20-3eaaa6dea415	chr1:g.24672566G>A	Single base substitution	3_prime_UTR_variant SRRM1 None	8/986,0.81%	29/10188	MODIFIER
3ea113f1-eb74-53e9-8e09-fbb1ff000874	chr15:g.20534646C>T	Single base substitution	synonymous_variant GOLGA6L6 R596R	7/986,0.71%	31/10188	LOW
42b961d2-9099-5fab-b204-0e891fa7d725	chr3:g.195782416T>G	Single base substitution	missense_variant MUC4 N3055T	7/986,0.71%	14/10188	MODERATE
45325bea-5e60-5d8a-bacc-246a49d45629	chr16:g.29485611C>G	Single base substitution	missense_variant RP11-231C14.4 V289L	7/986,0.71%	34/10188	MODERATE
647afa0c-e371-5921-b6a3-d5964ef943ef	chr17:g.7670685G>A	Single base substitution	stop_gained TP53 R342*	7/986,0.71%	33/10188	HIGH
699311f2-4280-5218-b1bf-d2a00eddd8c5	chr6:g.73519043A>G	Single base substitution	synonymous_variant EEF1A1 I170I	7/986,0.71%	26/10188	LOW
6ea4bac2-cb66-534f-9bf7-662b1d9b2f6c	chr3:g.179210291G>A	Single base substitution	missense_variant PIK3CA E453K	7/986,0.71%	19/10188	MODERATE
89aee9f6-9564-5c6b-bf5b-762620c36719	chr17:g.7674872T>C	Single base substitution	missense_variant TP53 Y220C	7/986,0.71%	68/10188	MODERATE
bf78ccae-48ea-5139-9fd0-fe6dff557371	chr11:g.1097336G>A	Single base substitution	non_coding_transcript_exon_variant MUC2 None	7/986,0.71%	14/10188	MODIFIER
f2776a01-dfc0-535e-a3d5-8bc8926fbb45	chr11:g.1097423A>C	Single base substitution	non_coding_transcript_exon_variant MUC2 None	7/986,0.71%	10/10188	MODIFIER
fe7d7b71-ac22-54e3-82e6-2b658d03cb90	chr22:g.18535866A>G	Single base substitution	non_coding_transcript_exon_variant PI4KAP1 None	7/986,0.71%	18/10188	MODIFIER
0d797d3c-ca18-59f6-80a0-e5572d70ec3c	chr17:g.7674894G>A	Single base substitution	stop_gained TP53 R213*	6/986,0.61%	71/10188	HIGH
1c7f0804-e115-5f0c-a903-a510b6b3dbbf	chr16:g.70186543G>C	Single base substitution	3_prime_UTR_variant CLEC18C None	6/986,0.61%	10/10188	MODIFIER
22465c10-43ac-58e8-a815-9f9cae61259a	chr3:g.195779688A>G	Single base substitution	synonymous_variant MUC4 G3964G	6/986,0.61%	22/10188	LOW
31990554-325e-5a50-a420-0510638a4f3e	chr11:g.1097430C>A	Single base substitution	non_coding_transcript_exon_variant MUC2 None	6/986,0.61%	14/10188	MODIFIER
40f6951d-5205-5c75-b0a5-eecac3617115	chr17:g.7674953T>C	Single base substitution	missense_variant TP53 H193R	6/986,0.61%	28/10188	MODERATE
82fa5eb1-8f6c-58f4-80c8-4a2863109b9f	chr1:g.148536242A>T	Single base substitution	missense_variant NBPF14 L2791M	6/986,0.61%	27/10188	MODERATE
852f1d61-a63b-5a62-8307-ed67aea61df2	chr14:g.18974884_18974885insTTTTTA	Small insertion	intron_variant POTEM None	6/986,0.61%	10/10188	MODIFIER
9263e824-72b3-5e57-ab08-1ca75397037e	chr11:g.1097346C>A	Single base substitution	non_coding_transcript_exon_variant MUC2 None	6/986,0.61%	14/10188	MODIFIER
a61e65d4-58b8-58e4-abfe-dfc06b2e9f59	chr11:g.1097434C>T	Single base substitution	non_coding_transcript_exon_variant MUC2 None	6/986,0.61%	23/10188	MODIFIER
b76b635d-88db-5cb2-abc3-23e82f2024d4	chr3:g.179218307A>G	Single base substitution	missense_variant PIK3CA Q546R	6/986,0.61%	22/10188	MODERATE
cc89c606-a9ba-5e3a-8fbf-52c8c7a61bdd	chr10:g.47461391G>A	Single base substitution	3_prime_UTR_variant ANXA8 None	6/986,0.61%	32/10188	MODIFIER
cfc74be4-557f-5145-a6a8-250b79013ceb	chr3:g.195780864G>T	Single base substitution	synonymous_variant MUC4 T3572T	6/986,0.61%	13/10188	LOW
da6f4d4f-a90a-53e0-a491-3de0b8b328a3	chr17:g.7675076T>C	Single base substitution	missense_variant TP53 H179R	6/986,0.61%	40/10188	MODERATE
e03cd9de-1049-56d8-a237-ec6929fb9be9	chr10:g.8073911_8073912insG	Small insertion	frameshift_variant GATA3 P408Afs*99	6/986,0.61%	6/10188	HIGH
e7951344-e561-5ff0-86c0-e9881fcb2d08	chr15:g.20534396A>C	Single base substitution	missense_variant GOLGA6L6 W680G	6/986,0.61%	19/10188	MODERATE
f2314aad-2320-57de-8092-e95168f23fd0	chr3:g.195780075T>G	Single base substitution	synonymous_variant MUC4 T3835T	6/986,0.61%	19/10188	LOW
0aeb3ef8-6222-5ceb-89aa-0451e442a72a	chr11:g.1097399C>T	Single base substitution	non_coding_transcript_exon_variant MUC2 None	5/986,0.51%	8/10188	MODIFIER
11fe52f2-21c5-5253-a1de-4d58ffa8bdeb	chr6:g.34022043T>C	Single base substitution	3_prime_UTR_variant GRM4 None	5/986,0.51%	10/10188	MODIFIER
127ac8c4-d424-5d7e-bbd2-cf2d1414f669	chr3:g.179210192T>C	Single base substitution	missense_variant PIK3CA C420R	5/986,0.51%	23/10188	MODERATE
16a145b2-694f-509e-868d-536c113b4159	chr15:g.22465652G>A	Single base substitution	missense_variant GOLGA6L22 M420I	5/986,0.51%	22/10188	MODERATE
1a034232-8636-59bc-a794-461d23a5d124	chr3:g.195780891T>G	Single base substitution	synonymous_variant MUC4 T3563T	5/986,0.51%	12/10188	LOW
2f092ecf-5d90-51d9-8a60-430d33324630	chr3:g.195782159T>C	Single base substitution	missense_variant MUC4 S3141G	5/986,0.51%	18/10188	MODERATE
31bc6782-9e5f-5b14-9b06-7b80c6168f52	chr3:g.179218304A>C	Single base substitution	missense_variant PIK3CA E545A	5/986,0.51%	18/10188	MODERATE
33589ac4-aaa5-5016-9cf3-cd55e0e7aec5	chr3:g.195782300G>A	Single base substitution	missense_variant MUC4 L3094F	5/986,0.51%	17/10188	MODERATE
39da35de-2350-5593-95ca-c995fb661dc1	chr17:g.7674221G>A	Single base substitution	missense_variant TP53 R248W	5/986,0.51%	90/10188	MODERATE
3b0db67d-d830-59e9-9f39-19fc22b13360	chrX:g.65506953delCTCT	Small deletion	3_prime_UTR_variant ZC3H12B None	5/986,0.51%	28/10188	MODIFIER
4327f61d-6fcd-5da5-91eb-c6a55fc3d3a9	chr22:g.21183986C>T	Single base substitution	non_coding_transcript_exon_variant FAM230B None	5/986,0.51%	17/10188	MODIFIER
477e2125-974b-5af0-a876-25596d99ddbf	chr17:g.7673803G>A	Single base substitution	missense_variant TP53 R273C	5/986,0.51%	125/10188	MODERATE
479a4069-5657-50b7-9016-0b1659f9cbdd	chr1:g.144436988C>A	Single base substitution	missense_variant NBPF15 D134Y	5/986,0.51%	28/10188	MODERATE
57efa600-aa48-5db7-878f-a08264bf4411	chr15:g.82434266G>A	Single base substitution	synonymous_variant GOLGA6L9 L222L	5/986,0.51%	11/10188	LOW
596df720-2a6c-5864-8876-db057746a773	chr17:g.7675085C>A	Single base substitution	missense_variant TP53 C176F	5/986,0.51%	26/10188	MODERATE
67254d3c-c322-5a76-a5f6-7cbefa71c17d	chr17:g.39723967T>C	Single base substitution	missense_variant ERBB2 L755S	5/986,0.51%	13/10188	MODERATE
92abee7e-421d-55e6-8a90-8a042a7ed5a8	chr7:g.72942166C>T	Single base substitution	missense_variant POM121 P725S	5/986,0.51%	18/10188	MODERATE
a695937d-db5f-58db-9b33-57f5039314d0	chr1:g.170998644A>T	Single base substitution	3_prime_UTR_variant MROH9 None	5/986,0.51%	12/10188	MODIFIER
a8f517c4-3622-5c66-b4cb-31db7251b0d4	chr10:g.45827364T>G	Single base substitution	missense_variant AGAP4 K181N	5/986,0.51%	64/10188	MODERATE
aa48fb64-e9ef-532d-94a0-3e315af1e944	chr1:g.148533964C>T	Single base substitution	missense_variant NBPF14 E2874K	5/986,0.51%	10/10188	MODERATE
cdb8f6ec-cfde-5286-943b-a9ea2e2b7ac1	chr11:g.1097380G>A	Single base substitution	non_coding_transcript_exon_variant MUC2 None	5/986,0.51%	10/10188	MODIFIER
d92398f6-2701-5ed5-ad21-2d766ec9a71c	chr3:g.179199690G>A	Single base substitution	missense_variant PIK3CA G118D	5/986,0.51%	28/10188	MODERATE
e81e0ebc-210b-51de-a4c6-15c606027f27	chr15:g.41464812delAA	Small deletion	frameshift_variant RTF1 K236Efs*37	5/986,0.51%	12/10188	HIGH
ec76d996-0a44-5003-baf7-1a3e311d73c3	chr17:g.7674947A>G	Single base substitution	missense_variant TP53 I195T	5/986,0.51%	22/10188	MODERATE
f5deaa49-8954-5665-bac0-2dfd309d1ebf	chr7:g.73325571A>G	Single base substitution	intron_variant TRIM50 None	5/986,0.51%	22/10188	MODIFIER
f6cdc0d5-69c3-5850-8004-528a0c39d337	chr11:g.1097335C>T	Single base substitution	non_coding_transcript_exon_variant MUC2 None	5/986,0.51%	24/10188	MODIFIER
04b144d9-99d3-51e4-81bf-acdeda602f90	chr4:g.2514476A>C	Single base substitution	3_prime_UTR_variant RNF4 None	4/986,0.41%	8/10188	MODIFIER
04f779d9-c3be-5c3e-b1b8-6195cae24d25	chr3:g.112362713_112362714insTATATA	Small insertion	downstream_gene_variant CD200 None	4/986,0.41%	9/10188	MODIFIER
0c202c86-526e-5ef3-9106-8f1d2a8fab35	chr19:g.8981324G>T	Single base substitution	5_prime_UTR_variant MUC16 None	4/986,0.41%	11/10188	MODIFIER
0eb6e3d3-5ff4-5d55-8f8f-9cc230748fc7	chr6:g.87589942G>A	Single base substitution	missense_variant RARS2 R6C	4/986,0.41%	16/10188	MODERATE
1ffb64dc-6b6a-5ec0-b6bc-6e7dc4ea031a	chr17:g.7673767C>T	Single base substitution	missense_variant TP53 E285K	4/986,0.41%	24/10188	MODERATE
27242e5d-6a89-504d-bb65-0893df811e39	chr10:g.46131074C>T	Single base substitution	non_coding_transcript_exon_variant AGAP7P None	4/986,0.41%	19/10188	MODIFIER
30fa9e4c-5cb3-53a2-9fdb-ddc43054593b	chr3:g.32526063delATAT	Small deletion	3_prime_UTR_variant DYNC1LI1 None	4/986,0.41%	24/10188	MODIFIER
33b22237-d104-5356-91b6-f4b9e4d34d01	chr17:g.18151242delC	Small deletion	frameshift_variant MYO15A P2536Lfs*7	4/986,0.41%	4/10188	HIGH
41f1896c-1f07-5419-b7f1-d7262ec51d2e	chr16:g.29527601A>G	Single base substitution	upstream_gene_variant AC133555.1 None	4/986,0.41%	10/10188	MODIFIER
4348f14d-c50c-56a6-930c-9e15d56bff62	chr2:g.173954943delTGTT	Small deletion	frameshift_variant SP3 T523Lfs*3	4/986,0.41%	5/10188	HIGH
50320293-3023-5084-aa47-3e9d461cb989	chr17:g.20504351C>T	Single base substitution	downstream_gene_variant RP11-434D2.7 None	4/986,0.41%	5/10188	MODIFIER
51af2c1d-7462-5cf5-92b1-c37e94ae7f41	chr11:g.1097352C>G	Single base substitution	non_coding_transcript_exon_variant MUC2 None	4/986,0.41%	7/10188	MODIFIER
53af5705-a17b-555a-92e9-880ce5c14ca0	chr17:g.7673776G>A	Single base substitution	missense_variant TP53 R282W	4/986,0.41%	87/10188	MODERATE
54b5e37d-5e77-58eb-b8a7-0b0f447ecaff	chr11:g.1097298G>C	Single base substitution	non_coding_transcript_exon_variant MUC2 None	4/986,0.41%	5/10188	MODIFIER
55329b42-6f46-52de-967b-0c5835b18e66	chr3:g.195782165C>G	Single base substitution	missense_variant MUC4 V3139L	4/986,0.41%	14/10188	MODERATE
56ecc83a-fd1c-5942-9766-a4c17de9b357	chr16:g.68801693C>T	Single base substitution	stop_gained CDH1 R63*	4/986,0.41%	5/10188	HIGH
58c9bbb6-6c1d-52d4-bef3-2741f2068ee7	chr7:g.106251003A>G	Single base substitution	3_prime_UTR_variant NAMPT None	4/986,0.41%	17/10188	MODIFIER
5d3b4603-7e53-5d64-9cc2-34a13d3c0e60	chr16:g.46703892T>A	Single base substitution	3_prime_UTR_variant MYLK3 None	4/986,0.41%	4/10188	MODIFIER
69da8680-fee6-5b4b-bf0c-4e5a3316dce9	chr17:g.18427271A>G	Single base substitution	non_coding_transcript_exon_variant KRT17P2 None	4/986,0.41%	4/10188	MODIFIER
71f9e49d-a4c9-58f2-b6d1-d79390eacdf6	chr10:g.87933148G>A	Single base substitution	missense_variant PTEN R130Q	4/986,0.41%	53/10188	MODERATE
745a84f0-28d4-588f-b533-08c60639964d	chr19:g.53876262delATATAT	Small deletion	3_prime_UTR_variant MYADM None	4/986,0.41%	28/10188	MODIFIER
769895a1-b105-5a45-822a-de5978a29fc7	chr16:g.30065810C>T	Single base substitution	intron_variant ALDOA None	4/986,0.41%	5/10188	MODIFIER
76ceb75b-c7db-5b0f-857f-ee1e6d6c4cae	chr21:g.34880697_34880698insC	Small insertion	frameshift_variant RUNX1 D96Gfs*15	4/986,0.41%	4/10188	HIGH
7c8a68fe-2712-5e2b-a83a-6e0d69183d48	chr12:g.16810G>A	Single base substitution	downstream_gene_variant AC215219.2 None	4/986,0.41%	5/10188	MODIFIER
7eb83240-59aa-5863-85c6-bce4331175bb	chr3:g.195780082G>A	Single base substitution	missense_variant MUC4 A3833V	4/986,0.41%	9/10188	MODERATE
841678df-435b-5a14-b3f9-a159401007db	chr10:g.8064095T>A	Single base substitution	missense_variant GATA3 M293K	4/986,0.41%	4/10188	MODERATE
87de4f52-7562-55d6-a233-57e8ae5d9ce7	chr3:g.195782714C>T	Single base substitution	missense_variant MUC4 G2956S	4/986,0.41%	17/10188	MODERATE
8ba8c3bc-3f32-5dc9-a1f2-118a30af2257	chr7:g.45084098C>T	Single base substitution	synonymous_variant NACAD S694S	4/986,0.41%	7/10188	LOW
93c1e3a9-89aa-587a-81e3-da63e60acefa	chr3:g.179218306C>A	Single base substitution	missense_variant PIK3CA Q546K	4/986,0.41%	15/10188	MODERATE
a0c26d74-9aef-5ad2-90ee-fa4ebebd7124	chr9:g.39371290C>T	Single base substitution	non_coding_transcript_exon_variant FAM74A1 None	4/986,0.41%	17/10188	MODIFIER
a1615c8e-599d-54a1-be88-0dacebb3c1df	chr3:g.195782627C>T	Single base substitution	missense_variant MUC4 A2985T	4/986,0.41%	23/10188	MODERATE
a24c9855-316f-57be-8871-286426a06e35	chr16:g.22491887A>T	Single base substitution	upstream_gene_variant AC106788.1 None	4/986,0.41%	18/10188	MODIFIER
aa2d3973-72ee-54a7-8e81-048cafb8a786	chr17:g.7674240delG	Small deletion	frameshift_variant TP53 C242Afs*5	4/986,0.41%	11/10188	HIGH
ab999c83-8173-5bbd-884b-a077b4cf00ef	chr1:g.144427921T>C	Single base substitution	synonymous_variant NBPF15 S370S	4/986,0.41%	23/10188	LOW
b1e85533-c8e6-57c9-80c3-a766d11f3dea	chr17:g.7674904delTC	Small deletion	frameshift_variant TP53 R209Kfs*6	4/986,0.41%	10/10188	HIGH
b5da969c-da8e-58c4-869f-5ab7312a632d	chr10:g.79514306C>T	Single base substitution	3_prime_UTR_variant EIF5AL1 None	4/986,0.41%	24/10188	MODIFIER
b7a567fc-949a-5066-b017-1b0e8202ac59	chr12:g.16040G>A	Single base substitution	downstream_gene_variant AC215219.2 None	4/986,0.41%	19/10188	MODIFIER
b93ba223-5c15-5e67-bac7-7990dafda06b	chr17:g.7674950A>C	Single base substitution	missense_variant TP53 L194R	4/986,0.41%	16/10188	MODERATE
c965657e-212c-5b40-b95b-29a8fa887f03	chr1:g.248858458T>G	Single base substitution	intron_variant ZNF692 None	4/986,0.41%	5/10188	MODIFIER
d9c13559-9adc-59bb-aeaa-11c5ef8b011c	chr16:g.70174348G>A	Single base substitution	missense_variant CLEC18C A24T	4/986,0.41%	17/10188	MODERATE
e6fd2fd2-0190-5750-b6a7-941484214b50	chr12:g.51246272delA	Small deletion	downstream_gene_variant DAZAP2 None	4/986,0.41%	6/10188	MODIFIER
ee3b8231-53b3-5c6d-b523-ad47cbcd4ac7	chr2:g.164492885G>A	Single base substitution	3_prime_UTR_variant GRB14 None	4/986,0.41%	10/10188	MODIFIER
f3a1fc82-e449-54ac-9201-7e5082b14c94	chrX:g.132077650T>A	Single base substitution	3_prime_UTR_variant FRMD7 None	4/986,0.41%	8/10188	MODIFIER
fdf0dc24-53c7-56f3-beaf-4408bfcc3346	chr11:g.1097404C>T	Single base substitution	non_coding_transcript_exon_variant MUC2 None	4/986,0.41%	6/10188	MODIFIER
046e2ccd-c61c-58ae-b1b0-59e0536c78df	chr4:g.117085071C>A	Single base substitution	missense_variant TRAM1L1 R108I	3/986,0.3%	5/10188	MODERATE
0615f7bd-5f32-5fa7-8408-d138c6874f0e	chr3:g.195782483C>T	Single base substitution	missense_variant MUC4 A3033T	3/986,0.3%	22/10188	MODERATE
06357c3f-47e5-5aa9-b0b2-cf116b3c6bb8	chr16:g.68810236G>A	Single base substitution	missense_variant CDH1 E243K	3/986,0.3%	3/10188	MODERATE
0d4bfe45-abdc-599f-8501-bab32058980a	chr17:g.76292884C>T	Single base substitution	missense_variant QRICH2 A449T	3/986,0.3%	12/10188	MODERATE
109bb9e5-5375-513b-affd-2c71f99de68f	chr16:g.46703891delGTGC	Small deletion	3_prime_UTR_variant MYLK3 None	3/986,0.3%	3/10188	MODIFIER
1797a87e-2c2e-5bae-b62d-cfc5e1590f5b	chr13:g.99965022delTATATA	Small deletion	3_prime_UTR_variant ZIC5 None	3/986,0.3%	8/10188	MODIFIER
17cbff5e-3616-5791-b041-6b97358a43e5	chr10:g.45826548G>A	Single base substitution	synonymous_variant AGAP4 N453N	3/986,0.3%	19/10188	LOW
1851cf27-980f-5322-a9d8-b15726353ebb	chr15:g.82345046G>A	Single base substitution	missense_variant GOLGA6L10 R272C	3/986,0.3%	10/10188	MODERATE
272b2606-5d45-5d5b-9e42-503a735fecfe	chr10:g.79513976C>T	Single base substitution	3_prime_UTR_variant EIF5AL1 None	3/986,0.3%	32/10188	MODIFIER
282bce7a-d54c-53d5-b7a0-cac8f374fbda	chr7:g.107929783G>C	Single base substitution	intron_variant LAMB1 None	3/986,0.3%	3/10188	MODIFIER
2bed7672-6b16-537e-98b8-cfb50e55c64f	chr16:g.56748287G>A	Single base substitution	missense_variant NUP93 E14K	3/986,0.3%	5/10188	MODERATE
2e1996f2-816c-5a0f-8a6a-beac19489876	chr7:g.106250901G>A	Single base substitution	3_prime_UTR_variant NAMPT None	3/986,0.3%	7/10188	MODIFIER
317ca671-6ee5-559d-beac-4e37b7cd780f	chr10:g.47461444G>C	Single base substitution	3_prime_UTR_variant ANXA8 None	3/986,0.3%	3/10188	MODIFIER
35c3995a-5fcd-571e-b04e-05b2e1161a0a	chr1:g.109910737delGTGT	Small deletion	5_prime_UTR_variant CSF1 None	3/986,0.3%	12/10188	MODIFIER
361f1bec-7116-5182-8d84-4811a9e31e6f	chr15:g.20535186C>T	Single base substitution	synonymous_variant GOLGA6L6 Q416Q	3/986,0.3%	8/10188	LOW
384ae9e9-e5d7-5e6a-95be-b187ccc8b97f	chr2:g.130680549T>G	Single base substitution	non_coding_transcript_exon_variant CYP4F30P None	3/986,0.3%	5/10188	MODIFIER
3a5e46ff-1089-5fb8-a6fa-ce1126de1185	chr3:g.195786606G>A	Single base substitution	synonymous_variant MUC4 S1658S	3/986,0.3%	4/10188	LOW
4072ad8d-147f-5605-8877-9379438679f5	chr11:g.1097253C>A	Single base substitution	non_coding_transcript_exon_variant MUC2 None	3/986,0.3%	8/10188	MODIFIER
4962273c-a226-5996-b929-bf6ac9ac1f2b	chr8:g.7015892A>G	Single base substitution	3_prime_UTR_variant DEFA3 None	3/986,0.3%	3/10188	MODIFIER
4977ea63-3e3b-57c8-8dde-243b06e55303	chr5:g.68295276delTTAAACCAGACC	Small deletion	inframe_deletion PIK3R1 K567_L570del	3/986,0.3%	3/10188	MODERATE
4d273654-09dc-59d5-b93a-83c575549f84	chr10:g.47461664C>T	Single base substitution	3_prime_UTR_variant ANXA8 None	3/986,0.3%	3/10188	MODIFIER
4e55052c-b97e-5be1-8427-fb78feee44e9	chr3:g.177051507_177051508insTA	Small insertion	frameshift_variant TBL1XR1 A142*	3/986,0.3%	3/10188	HIGH
4fb37566-16d1-5697-9732-27c359828bc7	chr12:g.25245350C>A	Single base substitution	missense_variant KRAS G12V	3/986,0.3%	176/10188	MODERATE
4fb64786-f4d8-5ef5-a184-6c176b99a214	chr8:g.18223133delAAA	Small deletion	3_prime_UTR_variant NAT1 None	3/986,0.3%	30/10188	MODIFIER
522ea97b-af8b-5ac1-b60f-1b588ee696e2	chr17:g.58357800delC	Small deletion	frameshift_variant RNF43 G659Vfs*41	3/986,0.3%	85/10188	HIGH
5345e67b-c7a9-5eaa-b471-7bd7d05a8950	chr9:g.39371280G>C	Single base substitution	non_coding_transcript_exon_variant FAM74A1 None	3/986,0.3%	17/10188	MODIFIER
541eee48-69e6-5eec-8550-3013f65f3b96	chr10:g.47491611C>A	Single base substitution	stop_gained FAM25G E22*	3/986,0.3%	3/10188	HIGH
58a2eb61-deb5-54b3-9e39-9e4fbce3dce4	chr14:g.18988312C>A	Single base substitution	missense_variant POTEM P434T	3/986,0.3%	5/10188	MODERATE
664a73c0-588a-5403-b64d-3b6d864e4592	chr3:g.195788206T>C	Single base substitution	missense_variant MUC4 D1125G	3/986,0.3%	13/10188	MODERATE
6754b72a-ccbc-53b7-8de9-d57e320c45b7	chr15:g.20535161T>C	Single base substitution	missense_variant GOLGA6L6 K425E	3/986,0.3%	16/10188	MODERATE
677a2010-05a2-5fae-a390-a33e6b4b2248	chr10:g.46759180G>A	Single base substitution	non_coding_transcript_exon_variant CTSLP2 None	3/986,0.3%	4/10188	MODIFIER
6a33431c-9be0-505f-82ef-deb5883da6de	chr17:g.7675190C>T	Single base substitution	missense_variant TP53 C141Y	3/986,0.3%	15/10188	MODERATE
6cb9c93a-617e-5073-96a2-05b8288456f7	chr17:g.16830573A>G	Single base substitution	non_coding_transcript_exon_variant KRT16P2 None	3/986,0.3%	4/10188	MODIFIER
716fce63-4e10-58b4-865c-e73a8f623c07	chr8:g.38150849T>G	Single base substitution	5_prime_UTR_variant STAR None	3/986,0.3%	3/10188	MODIFIER
731b55fa-6f4c-5980-9bc6-2e7b1048d279	chr17:g.7674229C>T	Single base substitution	missense_variant TP53 G245D	3/986,0.3%	15/10188	MODERATE
748fee84-9d5f-5a09-945e-28bdd9f4ab08	chr6:g.30986757T>A	Single base substitution	synonymous_variant MUC21 T194T	3/986,0.3%	5/10188	LOW
77b8132a-3715-5047-8379-826e2a7b3519	chr3:g.195781028_195781029insGTGACCGGTGGATGCCGAGGAAGCGTCGGTGACAGGAAGAGGGGTGGTGTCACCTGTGGATACTGAGGAAAAGCTGGTGACAGGAAGAGGGGTGGCGTGACCTGTGGATACTGAGGAAGTGTCGGTGACAGGAAGAGTCGTGGT	Small insertion	inframe_insertion MUC4 H3517_A3518insTTTLPVTDTSSVSTGHATPLPVTSFSSVSTGDTTPLPVTDASSASTGH	3/986,0.3%	12/10188	MODERATE
783bd060-fdc5-5e51-bca0-02b7116aad6d	chr1:g.10352639C>T	Single base substitution	missense_variant KIF1B R1320W	3/986,0.3%	3/10188	MODERATE
7c095617-9d76-562a-a17e-bad263e4e396	chr17:g.18151240A>T	Single base substitution	missense_variant MYO15A K2535M	3/986,0.3%	3/10188	MODERATE
805736e6-f8df-5dd0-aebf-71cbd9f7982d	chr15:g.33662609G>A	Single base substitution	synonymous_variant RYR3 T1693T	3/986,0.3%	5/10188	LOW
80c2b8a3-eb3f-5721-b088-d204c2413233	chr16:g.23062383A>T	Single base substitution	3_prime_UTR_variant USP31 None	3/986,0.3%	13/10188	MODIFIER
819ea00e-914a-5f04-94e7-1013e1b5f3eb	chr5:g.78039083delT	Small deletion	frameshift_variant AP3B1 K923Nfs*4	3/986,0.3%	26/10188	HIGH
820e5be5-8150-5fc3-9e3a-ee008179f79e	chr15:g.82524070G>A	Single base substitution	non_coding_transcript_exon_variant GOLGA6L17P None	3/986,0.3%	6/10188	MODIFIER
854c1b4f-447c-507d-be85-d03f9649ac7f	chr2:g.11182970_11182971insTG	Small insertion	3_prime_UTR_variant ROCK2 None	3/986,0.3%	5/10188	MODIFIER
88e3c0e1-cbac-598c-9f61-42db4741da64	chr15:g.101764200C>A	Single base substitution	non_coding_transcript_exon_variant DNM1P47 None	3/986,0.3%	8/10188	MODIFIER
88fea94c-a043-50c8-88fb-0af57e0c90be	chr12:g.56098849A>G	Single base substitution	missense_variant ERBB3 E928G	3/986,0.3%	5/10188	MODERATE
8ab325eb-d676-5675-b1f2-6a8daafd01a9	chr1:g.22092277A>G	Single base substitution	3_prime_UTR_variant CDC42 None	3/986,0.3%	5/10188	MODIFIER
8cb943a1-55e2-57b6-8b9a-d1972d56186d	chr14:g.37592256G>C	Single base substitution	missense_variant FOXA1 I176M	3/986,0.3%	4/10188	MODERATE
8d2dfec2-3a12-511c-90e9-3e29c039b548	chr17:g.7674220C>T	Single base substitution	missense_variant TP53 R248Q	3/986,0.3%	121/10188	MODERATE
8d6258b4-474e-509e-82ef-1c997d9baa47	chr17:g.7674885C>T	Single base substitution	missense_variant TP53 V216M	3/986,0.3%	13/10188	MODERATE
9180fad6-89f3-5fd8-bef8-98c7f529c0e4	chr2:g.113578161G>A	Single base substitution	non_coding_transcript_exon_variant FAM138B None	3/986,0.3%	4/10188	MODIFIER
964b04b3-6d60-5ad5-a2dc-502d26b34e51	chr8:g.52111949delTGTG	Small deletion	3_prime_UTR_variant ST18 None	3/986,0.3%	25/10188	MODIFIER
96af0600-eb1c-56ff-b183-4680cee16b8f	chrX:g.81116291G>T	Single base substitution	synonymous_variant HMGN5 A60A	3/986,0.3%	10/10188	LOW
999cb126-c866-5403-80a2-574fb38dc206	chr20:g.3786475delGGGGCCCATCCCGGCGCGCCCCCCGCCCCGGGGCCCGGCGCCGCCGCCGCCGCCCCGGGGCGG	Small deletion	coding_sequence_variant CENPB None	3/986,0.3%	5/10188	MODIFIER
a026a7f0-64f7-55a8-81b0-02e9518b2635	chr17:g.7674292T>C	Single base substitution	splice_acceptor_variant TP53 X225_splice	3/986,0.3%	15/10188	HIGH
a13dd0fe-bbbf-53a8-a780-a73afe043761	chr12:g.6235559C>G	Single base substitution	synonymous_variant CD9 T177T	3/986,0.3%	4/10188	LOW
a26cd55b-36b9-5671-8d35-71ecf76093d2	chr15:g.82345003C>G	Single base substitution	missense_variant GOLGA6L10 C286S	3/986,0.3%	15/10188	MODERATE
a34d03aa-fa0a-5253-928b-33a58a5e7356	chr17:g.18440196T>G	Single base substitution	non_coding_transcript_exon_variant KRT16P1 None	3/986,0.3%	3/10188	MODIFIER
a350a1a9-d5ef-52f8-b525-1ee112803c0c	chr14:g.24338666A>G	Single base substitution	intron_variant RIPK3 None	3/986,0.3%	7/10188	MODIFIER
a403ba15-e811-568f-b3c4-5058cd3d0c9f	chr3:g.195782682A>G	Single base substitution	synonymous_variant MUC4 T2966T	3/986,0.3%	12/10188	LOW
a93376e4-2501-5ad1-a2ea-d87741141b33	chr2:g.111785382G>T	Single base substitution	missense_variant ANAPC1 A1632D	3/986,0.3%	4/10188	MODERATE
aa069065-4725-5bbd-9b8f-69fafc8bad91	chr20:g.63920087G>A	Single base substitution	intron_variant DNAJC5 None	3/986,0.3%	17/10188	MODIFIER
ad5331fe-e4f8-5ecc-afe1-9ed419588685	chr12:g.50222686delC	Small deletion	intron_variant LIMA1 None	3/986,0.3%	6/10188	MODIFIER
ae82c997-16ec-524d-a453-18afa00a2842	chr15:g.82345024C>T	Single base substitution	missense_variant GOLGA6L10 R279H	3/986,0.3%	10/10188	MODERATE
aefd818c-873c-5b18-81a5-184b48707c76	chr7:g.133253163C>T	Single base substitution	missense_variant EXOC4 S21L	3/986,0.3%	4/10188	MODERATE
b1fc5c61-6bc0-574f-9eb7-66c24d4c52d3	chr2:g.147926117delA	Small deletion	frameshift_variant ACVR2A K437Rfs*5	3/986,0.3%	69/10188	HIGH
b20cda82-f77d-5df8-856b-0fef0a78750f	chr7:g.75148882T>C	Single base substitution	missense_variant GTF2IRD2B V812A	3/986,0.3%	17/10188	MODERATE
b251f9bf-ad10-527f-ae02-a6cad373cfcc	chr7:g.44040806A>G	Single base substitution	upstream_gene_variant DBNL None	3/986,0.3%	5/10188	MODIFIER
b2ab4dc6-d121-597a-96fc-405fc16f2584	chr17:g.16126142_16126143insT	Small insertion	frameshift_variant NCOR1 T525Nfs*11	3/986,0.3%	9/10188	HIGH
b7be3973-1667-5341-8976-e9a073e5d4b5	chr8:g.12400325T>G	Single base substitution	non_coding_transcript_exon_variant DEFB109P1 None	3/986,0.3%	8/10188	MODIFIER
b8b440ce-1f3d-5aad-8adc-d6ccbc1b850a	chr10:g.46342939A>G	Single base substitution	missense_variant CTGLF11P H132R	3/986,0.3%	25/10188	MODERATE
b974da99-b642-5603-ae25-948903f9f7b4	chr1:g.146986469A>C	Single base substitution	missense_variant NBPF12 R1003S	3/986,0.3%	9/10188	MODERATE
bf84d076-785a-5e28-8f8f-9bbb0aa4b1ff	chr17:g.7673537G>A	Single base substitution	stop_gained TP53 Q331*	3/986,0.3%	22/10188	HIGH
c1d0e49a-00ba-57b2-a5a7-c4c3cf688c11	chr5:g.141389874G>A	Single base substitution	missense_variant PCDHGB4 D664N	3/986,0.3%	4/10188	MODERATE
c37caee6-8c81-553f-b45a-9c48edd547b9	chr17:g.39724747G>T	Single base substitution	missense_variant ERBB2 V777L	3/986,0.3%	9/10188	MODERATE
ca4cc36b-284c-5e1a-abb3-4dd080975955	chr15:g.82436020G>C	Single base substitution	missense_variant GOLGA6L9 A373P	3/986,0.3%	18/10188	MODERATE
ca5855ff-72a0-50e9-b26b-01d9017c579f	chr8:g.93809963C>T	Single base substitution	intron_variant TMEM67 None	3/986,0.3%	5/10188	MODIFIER
cd2764d5-621d-5410-91fe-b3f31fd96cb7	chr3:g.195778910G>A	Single base substitution	missense_variant MUC4 P4224S	3/986,0.3%	10/10188	MODERATE
d1fbe2aa-a3e2-5e74-9cd7-e509d6a25575	chr2:g.233511819T>G	Single base substitution	intron_variant USP40 None	3/986,0.3%	4/10188	MODIFIER
d2420c25-4065-5152-a0f7-e04a4569c55c	chr3:g.69038998G>A	Single base substitution	synonymous_variant TMF1 G613G	3/986,0.3%	4/10188	LOW
d5b27159-f1ba-5122-9779-41d1352eebe2	chr1:g.165501553C>A	Single base substitution	non_coding_transcript_exon_variant RP11-280O1.2 None	3/986,0.3%	3/10188	MODIFIER
e1a318aa-2451-5970-bbfc-21784053ec59	chr3:g.179210272delGCCAGTACCTCATGGATTAGAAGATTT	Small deletion	inframe_deletion PIK3CA P447_L455del	3/986,0.3%	3/10188	MODERATE
ea312436-413f-5140-8444-371f6a77ed08	chr7:g.77779444delATAT	Small deletion	3_prime_UTR_variant RSBN1L None	3/986,0.3%	9/10188	MODIFIER
f1abe151-119e-51e4-8717-bb4a96dbb329	chr1:g.151288603delC	Small deletion	frameshift_variant ZNF687 H733Mfs*30	3/986,0.3%	10/10188	HIGH
f78620d2-2978-5646-862d-8851e2ecdc37	chr14:g.37592035G>A	Single base substitution	missense_variant FOXA1 S250F	3/986,0.3%	4/10188	MODERATE
f7ec87f9-b732-5c94-80aa-a38d621d8aed	chr17:g.7673802C>A	Single base substitution	missense_variant TP53 R273L	3/986,0.3%	27/10188	MODERATE
f8b78312-ffc3-5c02-af6f-5a1adeb34bfa	chr8:g.38381952T>C	Single base substitution	5_prime_UTR_variant WHSC1L1 None	3/986,0.3%	3/10188	MODIFIER
fd516257-add0-5236-91a2-2810ba26d535	chr17:g.36439560G>A	Single base substitution	upstream_gene_variant TBC1D3F None	3/986,0.3%	11/10188	MODIFIER
007119bf-a08a-540d-89b4-e412b423f36c	chr2:g.98397126C>T	Single base substitution	synonymous_variant CNGA3 N652N	2/986,0.2%	2/10188	LOW
00a363b0-0ed6-5b8a-bc6e-cda3a51b11f6	chr12:g.57212526G>A	Single base substitution	missense_variant LRP1 E4536K	2/986,0.2%	2/10188	MODERATE
00e9ea66-9383-5b61-989d-a583d6bf5159	chr10:g.48050295T>C	Single base substitution	non_coding_transcript_exon_variant BMS1P7 None	2/986,0.2%	14/10188	MODIFIER
011a861e-fc98-5873-a55a-6ae8c6e33b0f	chr8:g.109459614_109459615insA	Small insertion	frameshift_variant PKHD1L1 M2344Nfs*9	2/986,0.2%	2/10188	HIGH
01c1af27-337e-501f-b7ae-0a6b938fa20b	chr1:g.15747598C>T	Single base substitution	missense_variant TMEM82 S333L	2/986,0.2%	3/10188	MODERATE
024edacb-6165-50ed-bb94-e5379d99b7c7	chr1:g.175160797T>C	Single base substitution	5_prime_UTR_variant KIAA0040 None	2/986,0.2%	4/10188	MODIFIER
025524b1-05a8-5f9a-a89a-8b9402ecf987	chr17:g.42572810A>G	Single base substitution	3_prime_UTR_variant MLX None	2/986,0.2%	5/10188	MODIFIER
025d9e92-9523-54ac-b52c-7747f91e4e0c	chr17:g.12107827C>T	Single base substitution	missense_variant MAP2K4 S184L	2/986,0.2%	4/10188	MODERATE
0260d21b-15fe-5cf7-ac71-f2e8b79876c8	chr5:g.56882342C>T	Single base substitution	stop_gained MAP3K1 Q1048*	2/986,0.2%	2/10188	HIGH
026c907a-7eed-5be5-9f94-05001465af60	chr10:g.8073910_8073911insC	Small insertion	frameshift_variant GATA3 P408Afs*99	2/986,0.2%	2/10188	HIGH
03b4d2ce-4973-5819-a6d7-e333f1fedb5f	chr4:g.88408571G>A	Single base substitution	missense_variant HERC6 R441K	2/986,0.2%	2/10188	MODERATE
03bbf51f-6f8d-5a48-8c4e-7f8ccb0a1556	chr9:g.21367457C>T	Single base substitution	missense_variant IFNA13 R185K	2/986,0.2%	2/10188	MODERATE
03f1e205-a06b-54db-96e1-4690874f2d09	chr3:g.179234176G>C	Single base substitution	missense_variant PIK3CA G1007R	2/986,0.2%	6/10188	MODERATE
051788b1-8bb4-57ee-ba5d-3ed3c925de81	chr8:g.21909248A>G	Single base substitution	3_prime_UTR_variant DOK2 None	2/986,0.2%	2/10188	MODIFIER
052ce59e-26c1-5cef-a95e-12fd7c4faf3e	chr8:g.41539749G>A	Single base substitution	synonymous_variant GINS4 S123S	2/986,0.2%	2/10188	LOW
052ce9a0-4792-5c62-a271-8509889ef8b3	chr8:g.122951671C>G	Single base substitution	missense_variant ZHX2 S54C	2/986,0.2%	2/10188	MODERATE
057a0ddc-6b5f-5b2f-a807-027f1e33bf79	chr1:g.177939725G>A	Single base substitution	missense_variant SEC16B S727L	2/986,0.2%	2/10188	MODERATE
05be670e-7977-55a8-bd71-5d459f086cc8	chr10:g.47995404C>T	Single base substitution	missense_variant FAM25C E82K	2/986,0.2%	8/10188	MODERATE
05dd2ff6-eef2-5e25-8095-b9cc63a0ef3c	chr9:g.90613611G>A	Single base substitution	missense_variant DIRAS2 R73W	2/986,0.2%	2/10188	MODERATE
0601824c-bb5f-5af1-802f-6bd679ea259e	chr7:g.14841226G>A	Single base substitution	missense_variant DGKB S13L	2/986,0.2%	2/10188	MODERATE
06a9f4cb-1cb2-53de-b5ce-70066130d0ee	chr19:g.1430255delC	Small deletion	frameshift_variant DAZAP1 P257Rfs*78	2/986,0.2%	31/10188	HIGH
0705f7a4-de58-524a-8f0d-96570d61dd80	chr1:g.220796773C>G	Single base substitution	missense_variant MARC1 Q194E	2/986,0.2%	2/10188	MODERATE
079f66fe-41d3-5cbe-89cf-2410a4baf858	chr18:g.50664256G>A	Single base substitution	missense_variant MAPK4 V100M	2/986,0.2%	2/10188	MODERATE
08058d33-b48e-507a-8349-ad01709e8e47	chr2:g.174847038_174847039insTAATATTGTTT	Small insertion	intron_variant CHN1 None	2/986,0.2%	3/10188	MODIFIER
081f05b9-5f3a-5a61-a17d-96632098117f	chr11:g.85661961delTATA	Small deletion	3_prime_UTR_variant CREBZF None	2/986,0.2%	9/10188	MODIFIER
0824fcd9-6fcc-5714-bab8-bff70a7df4f5	chr1:g.247257141A>T	Single base substitution	non_coding_transcript_exon_variant VN1R5 None	2/986,0.2%	10/10188	MODIFIER
08afcebc-e4bc-5af2-a215-6b5eac1bf331	chr1:g.57015131G>C	Single base substitution	stop_gained DAB1 S432*	2/986,0.2%	2/10188	HIGH
08b61366-6b2f-5f0e-8d15-5599ecc5a37d	chr14:g.71709327G>A	Single base substitution	missense_variant SIPA1L1 E1312K	2/986,0.2%	3/10188	MODERATE
08dd8233-04f6-50ca-89d1-427965c6e669	chr6:g.26107621G>A	Single base substitution	missense_variant HIST1H1T A158V	2/986,0.2%	2/10188	MODERATE
08ebaf40-8274-50f3-9bfd-f3081ff7011c	chr3:g.156809723G>A	Single base substitution	intron_variant LINC00886 None	2/986,0.2%	2/10188	MODIFIER
0918a29a-4a5a-5396-83c7-227b8e114395	chr6:g.90536530_90536531insCAT	Small insertion	intron_variant MAP3K7 None	2/986,0.2%	5/10188	MODIFIER
09419e5a-3521-5109-8424-60725af29d79	chr8:g.120196931G>C	Single base substitution	missense_variant COL14A1 E193Q	2/986,0.2%	2/10188	MODERATE
0b05f12d-18e1-5917-99e8-ccfc731c780a	chr1:g.168242715G>A	Single base substitution	3_prime_UTR_variant SFT2D2 None	2/986,0.2%	3/10188	MODIFIER
0b09881d-e3ee-5302-ba47-d4a3f28c39b9	chr5:g.68301440G>A	Single base substitution	3_prime_UTR_variant PIK3R1 None	2/986,0.2%	3/10188	MODIFIER
0b24a8e0-f173-58df-9253-c11ac243ac1f	chr1:g.206437992C>T	Single base substitution	synonymous_variant SRGAP2 N553N	2/986,0.2%	2/10188	LOW
0c201bb7-3c22-5f08-aea2-4fc8df5089cf	chr1:g.247532027G>A	Single base substitution	missense_variant OR2C3 T162M	2/986,0.2%	2/10188	MODERATE
0c472c38-69a6-5989-ae10-d07faec59c52	chr13:g.49359824delT	Small deletion	frameshift_variant CAB39L D96Mfs*2	2/986,0.2%	9/10188	HIGH
0c605f82-2637-5aca-bb6b-928f0a3a9e5f	chr10:g.62399754delA	Small deletion	frameshift_variant ZNF365 K399Sfs*6	2/986,0.2%	17/10188	HIGH
0cba4c07-618b-50b8-93a3-dd2b71457cc5	chr7:g.89327409_89327410insA	Small insertion	frameshift_variant ZNF804B Q108Tfs*6	2/986,0.2%	4/10188	HIGH
0d33f419-9b56-5590-a0a9-42824394f295	chr6:g.12120240G>A	Single base substitution	missense_variant HIVEP1 E149K	2/986,0.2%	3/10188	MODERATE
0d73a224-a0ce-5567-9c66-b314dce5228f	chr11:g.70111753A>G	Single base substitution	synonymous_variant ANO1 P282P	2/986,0.2%	2/10188	LOW
0e2045be-83ba-59c8-85b0-4672dd7e950e	chr1:g.151694017G>T	Single base substitution	intron_variant SNX27 None	2/986,0.2%	3/10188	MODIFIER
0e31c1fb-b461-57fb-9737-6a9047472a36	chr4:g.99948895G>A	Single base substitution	missense_variant H2AFZ R81C	2/986,0.2%	3/10188	MODERATE
0e72511b-e6fb-59b8-95f0-45f36c066113	chrX:g.100675929T>C	Single base substitution	3_prime_UTR_variant SYTL4 None	2/986,0.2%	3/10188	MODIFIER
0f50c59a-d064-5e9f-9835-e0882bf18cd3	chr17:g.7676031A>C	Single base substitution	missense_variant TP53 F113C	2/986,0.2%	4/10188	MODERATE
0f532c23-5b7d-5867-aa28-1d86c1e37dd1	chr11:g.55812023G>T	Single base substitution	missense_variant OR5L1 S186I	2/986,0.2%	2/10188	MODERATE
0f6630da-7ec1-5710-bf17-060ba83eccf8	chr11:g.130233983T>G	Single base substitution	intron_variant ZBTB44 None	2/986,0.2%	3/10188	MODIFIER
0fbf9c99-8b6e-57d8-a51c-66fd7bcffdc8	chr8:g.97888164G>A	Single base substitution	missense_variant MATN2 E22K	2/986,0.2%	4/10188	MODERATE
0fc3f6b3-185f-5d04-b568-aff6a3e00f81	chr11:g.102205927G>A	Single base substitution	synonymous_variant YAP1 V279V	2/986,0.2%	2/10188	LOW
0fee12fe-f514-54cd-be83-3c392a8f3273	chr12:g.70538470T>C	Single base substitution	intron_variant PTPRB None	2/986,0.2%	3/10188	MODIFIER
104430ca-d1d7-5deb-83ee-1443ee2d59cf	chr3:g.179234302G>C	Single base substitution	missense_variant PIK3CA G1049R	2/986,0.2%	6/10188	MODERATE
106d351a-1b72-5ef3-a95b-0aa5788f1feb	chr1:g.237511755G>A	Single base substitution	missense_variant RYR2 R929H	2/986,0.2%	3/10188	MODERATE
10dad631-92f1-5191-a11b-af07d3ff19c2	chr17:g.44773382G>A	Single base substitution	missense_variant ADAM11 R316Q	2/986,0.2%	2/10188	MODERATE
11f63f77-cdbb-5f7c-9f7b-ca102f12ce2f	chr2:g.61492337C>T	Single base substitution	missense_variant XPO1 E571K	2/986,0.2%	10/10188	MODERATE
11f95ef5-c882-51e3-a3ab-179a8f4ada77	chr4:g.9368657C>T	Single base substitution	downstream_gene_variant USP17L15 None	2/986,0.2%	11/10188	MODIFIER
12511ce5-d8fd-5c82-a7eb-e8767d928bf8	chrX:g.137030394G>A	Single base substitution	synonymous_variant GPR101 V427V	2/986,0.2%	3/10188	LOW
1264de23-b97c-59e5-986c-b7b04a828787	chr18:g.68846317C>T	Single base substitution	missense_variant CCDC102B R278C	2/986,0.2%	4/10188	MODERATE
12c96057-1db6-5c2e-8022-b52235fc3890	chr17:g.7675994C>G	Single base substitution	splice_region_variant TP53 T125T	2/986,0.2%	4/10188	LOW
130b7854-4bb4-5c93-bd26-495bc47a8859	chr5:g.83077318T>C	Single base substitution	splice_region_variant TMEM167A None	2/986,0.2%	2/10188	LOW
13ee23e7-ff79-5a1f-9d51-2a1c07ddad89	chr12:g.111485772G>A	Single base substitution	stop_gained ATXN2 Q960*	2/986,0.2%	2/10188	HIGH
144a44e2-3476-57fe-aee2-28afa2029027	chr4:g.48515119C>T	Single base substitution	missense_variant FRYL E2616K	2/986,0.2%	2/10188	MODERATE
147d0e27-7e1a-508e-ac00-4d7e6a37e683	chr4:g.75645357delA	Small deletion	3_prime_UTR_variant G3BP2 None	2/986,0.2%	6/10188	MODIFIER
14a3c6ee-e2bd-57d9-869a-29347a99896b	chr1:g.85158732delA	Small deletion	3_prime_UTR_variant SYDE2 None	2/986,0.2%	7/10188	MODIFIER
1536f0ea-acf2-5609-9d32-d12c043bfa40	chr16:g.29485438C>G	Single base substitution	synonymous_variant RP11-231C14.4 L346L	2/986,0.2%	2/10188	LOW
15694d60-96ab-5084-8ec4-c73119ece8c0	chr17:g.7674230C>T	Single base substitution	missense_variant TP53 G245S	2/986,0.2%	42/10188	MODERATE
15de4711-e42e-52a9-a6f3-de8d7a5e1d1b	chr11:g.103062221delA	Small deletion	3_prime_UTR_variant DCUN1D5 None	2/986,0.2%	3/10188	MODIFIER
16745a42-a450-5b60-9508-3201fddcfc9d	chr1:g.214605805C>T	Single base substitution	intron_variant CENPF None	2/986,0.2%	2/10188	MODIFIER
169b7bc1-b6e9-529c-ba9a-8314f60151f5	chr3:g.33094001G>A	Single base substitution	synonymous_variant TMPPE R65R	2/986,0.2%	2/10188	LOW
1764cf82-3963-5d1d-8bad-0e8ca7fc5a1c	chr17:g.60073263A>G	Single base substitution	missense_variant HEATR6 L162P	2/986,0.2%	2/10188	MODERATE
18cdd81c-ddee-50ae-91f9-517268b78c24	chr22:g.24728036G>A	Single base substitution	synonymous_variant PIWIL3 F650F	2/986,0.2%	3/10188	LOW
19c7b4da-de19-539f-80d4-bceb957344ff	chr8:g.68053241G>A	Single base substitution	missense_variant PREX2 R363Q	2/986,0.2%	3/10188	MODERATE
19fe4efd-5111-5fd5-bec0-fb92eee6d9c5	chr19:g.53679964G>A	Single base substitution	mature_miRNA_variant MIR519E None	2/986,0.2%	11/10188	MODIFIER
1a198733-a1c1-5e57-b3b2-14cd505ccba4	chr19:g.47801741C>G	Single base substitution	3_prime_UTR_variant TPRX1 None	2/986,0.2%	2/10188	MODIFIER
1a81cb00-6a2f-5565-a586-708e16e10cec	chr5:g.69114488G>A	Single base substitution	missense_variant SLC30A5 D202N	2/986,0.2%	2/10188	MODERATE
1a83c0b2-988f-5dd8-b005-8216daa8e156	chr7:g.93276366C>T	Single base substitution	intron_variant CCDC132 None	2/986,0.2%	2/10188	MODIFIER
1b19bf0d-fe86-5a9b-88b2-fe3c791ca2e4	chr4:g.44636000_44636001insA	Small insertion	frameshift_variant YIPF7 Q92Sfs*16	2/986,0.2%	2/10188	HIGH
1b202a1c-e611-5ba1-b98e-1ed3f47ee4c1	chr4:g.145137362delT	Small deletion	3_prime_UTR_variant OTUD4 None	2/986,0.2%	44/10188	MODIFIER
1b279e2a-43af-5269-8917-a578d3f0b2e0	chr12:g.56088823C>T	Single base substitution	missense_variant ERBB3 T355I	2/986,0.2%	4/10188	MODERATE
1b9c9b9a-8767-5505-9ac7-298e1eeb5c32	chr6:g.55513840T>A	Single base substitution	intron_variant HMGCLL1 None	2/986,0.2%	2/10188	MODIFIER
1ba27a2a-f70d-5866-862b-30d5989a1b7e	chr12:g.6121294G>A	Single base substitution	stop_gained VWF R34*	2/986,0.2%	3/10188	HIGH
1bd7db34-b13c-5ae5-a812-663f9213ac44	chr2:g.102505332delC	Small deletion	frameshift_variant SLC9A4 F354Sfs*2	2/986,0.2%	8/10188	HIGH
1be39f53-6f5c-560b-8d82-586a7ec63890	chr10:g.29550659C>A	Single base substitution	missense_variant SVIL Q255H	2/986,0.2%	2/10188	MODERATE
1c1cf67b-e48c-5e21-82e5-49c3af43d65e	chr7:g.158192471G>A	Single base substitution	synonymous_variant PTPRN2 S135S	2/986,0.2%	2/10188	LOW
1ca86426-c78e-5eb1-9652-7938ad42fd44	chr5:g.149914962C>G	Single base substitution	missense_variant PDE6A E327Q	2/986,0.2%	2/10188	MODERATE
1cae2038-843b-5fff-a9b4-84865d5629d0	chr7:g.149811982C>T	Single base substitution	missense_variant SSPO R3207W	2/986,0.2%	5/10188	MODERATE
1cd640d2-64fd-59f4-b25f-ad7e80f530c5	chr2:g.27894617G>A	Single base substitution	missense_variant BRE V21M	2/986,0.2%	4/10188	MODERATE
1cfadece-251e-5da4-b6b8-cdca18e0e56c	chr3:g.155775761C>G	Single base substitution	missense_variant C3orf33 E88Q	2/986,0.2%	2/10188	MODERATE
1d04a3c2-508f-5574-a139-ca7edda70ea5	chr8:g.11422379T>G	Single base substitution	3_prime_UTR_variant FAM167A None	2/986,0.2%	6/10188	MODIFIER
1d267157-6614-5982-a25b-a0c348cf3e19	chr1:g.85190596_85190597insTTTTT	Small insertion	frameshift_variant SYDE2 L301Qfs*58	2/986,0.2%	2/10188	HIGH
1d28cc9d-ad2a-5945-9293-74a41c75f803	chr1:g.110963627G>A	Single base substitution	missense_variant LRIF1 S21L	2/986,0.2%	4/10188	MODERATE
1e746999-e6f9-506f-8b0d-f511047ceb90	chr3:g.179234296C>T	Single base substitution	missense_variant PIK3CA H1047Y	2/986,0.2%	13/10188	MODERATE
1ed100c6-4a5e-5e02-ac9c-8e73118ab6ee	chr3:g.151368166C>T	Single base substitution	synonymous_variant MED12L D1120D	2/986,0.2%	3/10188	LOW
1f2758c6-7083-56bb-b217-8d0d9004fce4	chr1:g.160093933G>C	Single base substitution	synonymous_variant IGSF8 A227A	2/986,0.2%	2/10188	LOW
1f6c1c8d-55dc-58f0-b2ea-a8760fe56829	chr2:g.33257445delA	Small deletion	frameshift_variant LTBP1 K777Rfs*8	2/986,0.2%	2/10188	HIGH
204c9ddb-8f43-513b-aa2f-27fe0d767b9d	chr5:g.160474443C>A	Single base substitution	non_coding_transcript_exon_variant MIR3142 None	2/986,0.2%	12/10188	MODIFIER
2129fc82-d53a-59c7-85cf-4cde405b92ed	chr9:g.70131573G>A	Single base substitution	missense_variant MAMDC2 D319N	2/986,0.2%	4/10188	MODERATE
22422804-2dba-5d69-81bc-cb420971bfb3	chr12:g.51807445C>T	Single base substitution	3_prime_UTR_variant SCN8A None	2/986,0.2%	2/10188	MODIFIER
2265b349-47d1-570c-b461-fdd9c71dbedc	chr7:g.55143404G>A	Single base substitution	missense_variant EGFR E114K	2/986,0.2%	5/10188	MODERATE
22c2a2e0-ba62-55ad-9b05-1796d7d534d7	chr7:g.128652946C>T	Single base substitution	non_coding_transcript_exon_variant RP11-274B21.4 None	2/986,0.2%	3/10188	MODIFIER
22dc5c9f-72fc-5198-9ee9-02fab0c3b3fc	chr10:g.829719G>A	Single base substitution	stop_gained LARP4B R293*	2/986,0.2%	2/10188	HIGH
23ad574e-5c2d-5fd1-9638-4f0cdbb0dd44	chr3:g.187076989A>T	Single base substitution	3_prime_UTR_variant ST6GAL1 None	2/986,0.2%	10/10188	MODIFIER
246020a3-200a-512f-83bb-e9e0e40cdbdb	chr6:g.145927323_145927324insTTCACATG	Small insertion	intron_variant SHPRH None	2/986,0.2%	3/10188	MODIFIER
24d41c47-88db-53d3-9ba0-c2441e384bcf	chrX:g.48902787C>T	Single base substitution	synonymous_variant PQBP1 D211D	2/986,0.2%	3/10188	LOW
250f6d6e-c2d7-5eb1-aedf-f3ebad46a9f7	chr19:g.15256100delT	Small deletion	frameshift_variant BRD4 K572Rfs*12	2/986,0.2%	2/10188	HIGH
256fc418-c914-5546-8836-0b671be9968d	chr2:g.162214039C>T	Single base substitution	missense_variant FAP D301N	2/986,0.2%	3/10188	MODERATE
25bbd813-9ae8-5a97-a86a-679c46fe1af1	chr16:g.3249561C>T	Single base substitution	missense_variant MEFV R377H	2/986,0.2%	4/10188	MODERATE
2656917f-e841-5fe6-be8b-bdce3307d6e4	chr10:g.99877281G>T	Single base substitution	stop_gained DNMBP S1535*	2/986,0.2%	4/10188	HIGH
268a89f2-4039-515d-be3a-d25fee0268ef	chr6:g.44403972C>G	Single base substitution	missense_variant CDC5L L235V	2/986,0.2%	3/10188	MODERATE
26941cae-998a-5bc8-b518-7e5c299e3451	chr1:g.40236860C>T	Single base substitution	stop_gained RLF R720*	2/986,0.2%	2/10188	HIGH
26c10c21-1334-5fd5-80b9-db66e6ffe775	chr16:g.30398054G>A	Single base substitution	synonymous_variant ZNF48 P268P	2/986,0.2%	2/10188	LOW
26e65d43-f498-5042-9dc4-ab4f5d8fad8d	chr13:g.49188531G>A	Single base substitution	missense_variant FNDC3A M614I	2/986,0.2%	2/10188	MODERATE
27205ba0-61fe-5453-94bd-b5bcc08f7a80	chr19:g.54107057G>C	Single base substitution	missense_variant TFPT S252C	2/986,0.2%	2/10188	MODERATE
2824ba18-690a-5f7a-859f-fe317ec5de57	chr22:g.21183850A>T	Single base substitution	non_coding_transcript_exon_variant FAM230B None	2/986,0.2%	12/10188	MODIFIER
282d8fde-9518-5ce6-9d06-9843d3b1572c	chr20:g.62966833C>T	Single base substitution	intron_variant SLC17A9 None	2/986,0.2%	2/10188	MODIFIER
285fef39-ad9f-5a37-b0ad-b3dffda7e6dc	chr17:g.40799633C>A	Single base substitution	missense_variant KRT28 K87N	2/986,0.2%	2/10188	MODERATE
288ccd50-da7e-57b6-8a24-0f042d2cfd10	chr5:g.79131120C>T	Single base substitution	3_prime_UTR_variant BHMT None	2/986,0.2%	3/10188	MODIFIER
28c94d5d-c61d-586d-9cdf-2f6eb1b7e7c0	chr14:g.60471555G>A	Single base substitution	stop_gained C14orf39 R170*	2/986,0.2%	3/10188	HIGH
28ee91fd-129c-5e1e-878b-7f3fd0ae0c27	chr22:g.22643258G>A	Single base substitution	upstream_gene_variant GGTLC2 None	2/986,0.2%	4/10188	MODIFIER
28f46824-1ee9-5953-a067-c37d2f40e516	chr17:g.74370558C>T	Single base substitution	synonymous_variant GPR142 H132H	2/986,0.2%	2/10188	LOW
2915d42e-23f0-57ed-af2a-7b817e8eb9dc	chr1:g.89715020A>G	Single base substitution	3_prime_UTR_variant LRRC8C None	2/986,0.2%	2/10188	MODIFIER
2950563e-d86a-5d43-a8ad-3a2313e0f2ce	chr1:g.152156543C>G	Single base substitution	missense_variant RPTN E186Q	2/986,0.2%	2/10188	MODERATE
2980eeeb-c0ab-5100-b72c-75eeaf3919ad	chr7:g.73199760C>T	Single base substitution	non_coding_transcript_exon_variant RP11-396K3.1 None	2/986,0.2%	11/10188	MODIFIER
29f4e29e-c937-5a48-9343-4acb3b37439b	chr1:g.43972155C>T	Single base substitution	splice_region_variant DPH2 None	2/986,0.2%	2/10188	LOW
2a1f0093-d946-5e9e-b227-c359057beb06	chr9:g.127894560G>C	Single base substitution	synonymous_variant ST6GALNAC6 L83L	2/986,0.2%	2/10188	LOW
2a39ea97-0cf9-5201-b1f1-b3f57a36785c	chr10:g.47461690A>C	Single base substitution	3_prime_UTR_variant ANXA8 None	2/986,0.2%	3/10188	MODIFIER
2aeb7a51-c2ad-5a2c-b025-89b0e71bcb66	chrX:g.9406416G>A	Single base substitution	non_coding_transcript_exon_variant RP11-126O22.1 None	2/986,0.2%	4/10188	MODIFIER
2b2c7c10-a4ab-5822-a218-16adf3ad2fa8	chr13:g.52189930delA	Small deletion	non_coding_transcript_exon_variant MRPS31P5 None	2/986,0.2%	4/10188	MODIFIER
2b5e1796-cdf1-5cc5-b191-cade1cd7fdb5	chr3:g.195782300G>T	Single base substitution	missense_variant MUC4 L3094I	2/986,0.2%	5/10188	MODERATE
2cf56ee9-0338-585c-b7b6-0fc115ca2672	chr1:g.157539326C>T	Single base substitution	missense_variant FCRL5 E388K	2/986,0.2%	2/10188	MODERATE
2d232b69-78b8-5e0c-a66b-6c4955740bc4	chr16:g.89914766T>C	Single base substitution	upstream_gene_variant MC1R None	2/986,0.2%	7/10188	MODIFIER
2d2eab2c-8102-5ac4-a221-013b4d368309	chr5:g.37008031_37008032insT	Small insertion	frameshift_variant NIPBL V1424Cfs*6	2/986,0.2%	6/10188	HIGH
2d54e800-f6ac-5737-9d75-86cd40ecf6d7	chr1:g.77933192delA	Small deletion	intron_variant NEXN None	2/986,0.2%	24/10188	MODIFIER
2e470daf-fb50-53eb-96ec-fee9c9be2d2e	chr17:g.7674953T>A	Single base substitution	missense_variant TP53 H193L	2/986,0.2%	11/10188	MODERATE
2fb84c4b-b8bb-5c74-ab95-f37cf08953c5	chr7:g.87440222C>G	Single base substitution	missense_variant ABCB4 E513Q	2/986,0.2%	2/10188	MODERATE
303698ec-ca99-5280-8673-27fe496c9943	chr20:g.34438502G>A	Single base substitution	missense_variant ITCH E225K	2/986,0.2%	2/10188	MODERATE
303bd333-75f7-5c86-839f-a25599afdb36	chr4:g.152328233G>A	Single base substitution	missense_variant FBXW7 R465C	2/986,0.2%	40/10188	MODERATE
30b85d67-c2ef-5653-8a8f-0e9259bd66ac	chr7:g.100198892C>T	Single base substitution	missense_variant STAG3 R468C	2/986,0.2%	4/10188	MODERATE
3109db34-ed82-524d-881f-bd8b37503e52	chr17:g.82172654T>C	Single base substitution	synonymous_variant CCDC57 G571G	2/986,0.2%	3/10188	LOW
316605f6-06f7-5f84-9408-ec918fe09d82	chr15:g.25721819C>T	Single base substitution	missense_variant ATP10A E401K	2/986,0.2%	2/10188	MODERATE
322449cb-4234-503c-abb0-7326c884364d	chr3:g.179204540C>G	Single base substitution	missense_variant PIK3CA P366R	2/986,0.2%	2/10188	MODERATE
3298547b-66bb-510f-92c0-952b7a85e804	chr1:g.150268720G>A	Single base substitution	missense_variant APH1A R31C	2/986,0.2%	5/10188	MODERATE
32de6076-b291-522c-a6c6-097033e45cd1	chr11:g.1097284A>C	Single base substitution	non_coding_transcript_exon_variant MUC2 None	2/986,0.2%	12/10188	MODIFIER
32f54500-a629-56d7-bee5-e55c828b761a	chr8:g.132751911C>T	Single base substitution	missense_variant TMEM71 R63Q	2/986,0.2%	2/10188	MODERATE
330a4427-f230-5761-811b-2f3881c45325	chr15:g.41512260G>A	Single base substitution	missense_variant LTK S122L	2/986,0.2%	2/10188	MODERATE
334ca839-f588-500e-adc3-02bab49446c8	chr12:g.14805773A>T	Single base substitution	3_prime_UTR_variant SMCO3 None	2/986,0.2%	2/10188	MODIFIER
3389c596-206e-5542-9333-1263898cb1c1	chr3:g.81591153delA	Small deletion	frameshift_variant GBE1 S374Qfs*12	2/986,0.2%	3/10188	HIGH
33ae2181-e35a-5198-8637-b89ea6365c45	chr12:g.128544001G>A	Single base substitution	missense_variant TMEM132C R340H	2/986,0.2%	2/10188	MODERATE
33caa592-a0e8-5329-a152-b012f961cf2d	chr6:g.167976203G>T	Single base substitution	downstream_gene_variant MLLT4 None	2/986,0.2%	5/10188	MODIFIER
349549dc-0e54-5fe5-914b-ba5de86df60b	chr7:g.63292238T>A	Single base substitution	non_coding_transcript_exon_variant ZNF733P None	2/986,0.2%	2/10188	MODIFIER
34ca23a8-3292-50e6-8369-26297a100679	chr10:g.60072715_60072716insTGATGTAAGAGAGAATCACATTGGTC	Small insertion	frameshift_variant ANK3 F2722Lfs*59	2/986,0.2%	3/10188	HIGH
34d97caf-f22a-53d0-bf30-dc642c839d96	chr1:g.12795871C>T	Single base substitution	missense_variant PRAMEF1 R434W	2/986,0.2%	3/10188	MODERATE
34f0c82f-29cc-5d74-93aa-f14b6fa8bf48	chr10:g.3149727C>T	Single base substitution	missense_variant PITRM1 A589T	2/986,0.2%	2/10188	MODERATE
359463f8-f1b1-51d7-bf04-245d31baff0a	chr7:g.73594270G>A	Single base substitution	splice_region_variant MLXIPL None	2/986,0.2%	2/10188	LOW
35a10741-0fa8-530f-b4f8-be25c41a2ce6	chr2:g.161993077A>T	Single base substitution	3_prime_UTR_variant DPP4 None	2/986,0.2%	2/10188	MODIFIER
36234092-cdcd-5457-9895-b9cdae306140	chr8:g.76706436G>A	Single base substitution	missense_variant ZFHX4 R783Q	2/986,0.2%	6/10188	MODERATE
36575ad2-bb46-5af1-917c-9faaba613787	chr6:g.75183958G>A	Single base substitution	missense_variant COL12A1 S395L	2/986,0.2%	3/10188	MODERATE
366a1807-d180-5b98-87c7-dcdc004b06bb	chr21:g.39397049delT	Small deletion	3_prime_UTR_variant WRB None	2/986,0.2%	7/10188	MODIFIER
36c46ac5-2fd7-5a02-bb8e-c0d3f61e2b54	chr9:g.98290285T>G	Single base substitution	3_prime_UTR_variant GABBR2 None	2/986,0.2%	5/10188	MODIFIER
36fddf87-d102-5b9e-aa8f-f74ddbc30112	chr5:g.141303270G>A	Single base substitution	missense_variant SLC25A2 A199V	2/986,0.2%	2/10188	MODERATE
370aac54-42e8-5e20-83eb-a5e04f31d764	chr16:g.29993707G>T	Single base substitution	synonymous_variant HIRIP3 G447G	2/986,0.2%	2/10188	LOW
376be555-6f52-574f-b63f-81004f66cb0f	chr9:g.32633085C>T	Single base substitution	missense_variant TAF1L R832H	2/986,0.2%	2/10188	MODERATE
379a1877-a6b5-51a6-8ba0-fc5b91f273ec	chr10:g.92349487C>T	Single base substitution	missense_variant MARCH5 R170C	2/986,0.2%	3/10188	MODERATE
37b0d9c5-5717-5d39-bf1b-2ba65b9a954d	chr11:g.1097422C>A	Single base substitution	non_coding_transcript_exon_variant MUC2 None	2/986,0.2%	3/10188	MODIFIER
37ca5755-a21b-5ba6-9001-76cf46b02f5e	chr10:g.8069531_8069532insCTGGAGG	Small insertion	frameshift_variant GATA3 R330Lfs*24	2/986,0.2%	2/10188	HIGH
380765fd-e0ad-5cfa-a8bc-d81e4553b1df	chr17:g.7675095C>T	Single base substitution	missense_variant TP53 V173M	2/986,0.2%	14/10188	MODERATE
382525fd-e301-5cef-a439-a8d3484a9e2c	chr12:g.96649952delACAA	Small deletion	frameshift_variant CFAP54 T1586Ffs*23	2/986,0.2%	3/10188	HIGH
38266d7d-c26b-50c9-952c-1a2b0139d614	chr17:g.41041052T>C	Single base substitution	missense_variant KRTAP1-1 I116V	2/986,0.2%	3/10188	MODERATE
389f79d3-f94b-5368-b9cc-1495251d04fd	chr17:g.48612722delGAGCGA	Small deletion	3_prime_UTR_variant HOXB8 None	2/986,0.2%	2/10188	MODIFIER
38e220b6-137d-5306-9e39-40f66c7eaf6e	chr3:g.109312624G>A	Single base substitution	synonymous_variant DPPA2 D34D	2/986,0.2%	5/10188	LOW
397a6742-8bf8-5288-bb5e-f2b629826954	chrX:g.47202408C>T	Single base substitution	synonymous_variant UBA1 F320F	2/986,0.2%	3/10188	LOW
3a074ff6-7e3d-55e9-9856-ea316641a05f	chr3:g.195783893_195783894insATGAAG	Small insertion	inframe_insertion MUC4 P2562_V2563insLH	2/986,0.2%	2/10188	MODERATE
3a08af71-3eb1-5605-98ad-5b7e1faf58d5	chr11:g.60297290G>A	Single base substitution	missense_variant MS4A4A V99M	2/986,0.2%	3/10188	MODERATE
3a32e1be-9451-56d6-8af0-9538124af333	chr11:g.56417860C>T	Single base substitution	missense_variant OR5R1 A125T	2/986,0.2%	3/10188	MODERATE
3a5524da-b8c2-59d7-97fb-a0e1c7e6fbbe	chr20:g.8708731C>T	Single base substitution	missense_variant PLCB1 S410L	2/986,0.2%	5/10188	MODERATE
3a71bd4b-9d7e-5b54-b2fc-eaad238adea8	chr10:g.87933147C>T	Single base substitution	stop_gained PTEN R130*	2/986,0.2%	26/10188	HIGH
3b5f5610-485f-5948-a9ba-ad69e8d92650	chr12:g.14651472C>A	Single base substitution	missense_variant GUCY2C G549C	2/986,0.2%	2/10188	MODERATE
3b845984-094a-596c-9f5d-2f4167f35d33	chr5:g.173328411G>A	Single base substitution	5_prime_UTR_variant STC2 None	2/986,0.2%	2/10188	MODIFIER
3c452a31-7e77-547c-92bb-7a27c8a8d8ca	chr1:g.16029975C>T	Single base substitution	synonymous_variant CLCNKA I436I	2/986,0.2%	3/10188	LOW
3c4ab480-9c59-53ed-8773-725a21ffb6a5	chr10:g.8069550_8069551insGG	Small insertion	frameshift_variant GATA3 D335Gfs*21	2/986,0.2%	2/10188	HIGH
3c79d3d0-5171-5108-a287-c3980bd6d3c0	chr6:g.70225960G>A	Single base substitution	synonymous_variant COL9A1 N851N	2/986,0.2%	2/10188	LOW
3c7dd0ac-de18-5100-8ff9-caaaba613020	chr3:g.138398520G>C	Single base substitution	missense_variant MRAS L133F	2/986,0.2%	2/10188	MODERATE
3d15871c-37d5-5160-89db-24b5e131ff34	chr20:g.47246328delT	Small deletion	frameshift_variant ZMYND8 K635Sfs*14	2/986,0.2%	15/10188	HIGH
3d3df379-33e0-5d0b-8b7f-71dccc039db9	chr4:g.68497135G>T	Single base substitution	3_prime_UTR_variant TMPRSS11E None	2/986,0.2%	4/10188	MODIFIER
3d84e0bb-954b-5787-9f9a-a50192c2dbe8	chr15:g.20534480T>G	Single base substitution	synonymous_variant GOLGA6L6 R652R	2/986,0.2%	2/10188	LOW
3da99a46-7cbf-5c9c-8caa-e652a0a19c29	chr16:g.81711619delAAA	Small deletion	3_prime_UTR_variant CMIP None	2/986,0.2%	5/10188	MODIFIER
3ddea947-49e5-58d8-918a-b23946d724b7	chr19:g.36340093G>A	Single base substitution	3_prime_UTR_variant ZFP14 None	2/986,0.2%	2/10188	MODIFIER
3e9125a8-f5c5-5054-9ada-e5ebf2f7c61e	chr3:g.195779136G>A	Single base substitution	synonymous_variant MUC4 T4148T	2/986,0.2%	13/10188	LOW
3e97b76c-d729-5aee-8927-24252fd8f917	chr6:g.32371778G>A	Single base substitution	5_prime_UTR_variant C6orf10 None	2/986,0.2%	6/10188	MODIFIER
3f0d7a93-3067-5da6-bf1e-f15901780b89	chr9:g.39072847A>C	Single base substitution	3_prime_UTR_variant CNTNAP3 None	2/986,0.2%	2/10188	MODIFIER
3fcb553e-6ec1-5e43-b1e5-9f0049eff51f	chr5:g.35026217A>T	Single base substitution	intron_variant AGXT2 None	2/986,0.2%	2/10188	MODIFIER
4006a855-6905-5b10-b357-77d9034b8319	chr2:g.167246966G>A	Single base substitution	synonymous_variant XIRP2 T1683T	2/986,0.2%	3/10188	LOW
4172c7da-5797-568f-948a-bfec15b272c9	chr17:g.12113299G>T	Single base substitution	missense_variant MAP2K4 S251I	2/986,0.2%	2/10188	MODERATE
42072ebf-45ee-5796-87e3-f86a938e68c3	chr8:g.103912120G>A	Single base substitution	missense_variant RIMS2 R442H	2/986,0.2%	7/10188	MODERATE
42150177-1e89-5e21-94cc-38a87522dad5	chr8:g.54621110C>T	Single base substitution	synonymous_variant RP1 F48F	2/986,0.2%	5/10188	LOW
42b6a185-dd50-505b-aa44-8769df447bf6	chr4:g.88467181C>A	Single base substitution	stop_gained HERC5 S345*	2/986,0.2%	2/10188	HIGH
42f01d02-659d-5815-b192-ba9902f47caa	chr1:g.226385596C>T	Single base substitution	missense_variant PARP1 D307N	2/986,0.2%	2/10188	MODERATE
43422159-7803-546f-893b-9c92bd2ee7a8	chr17:g.7673781C>T	Single base substitution	missense_variant TP53 R280K	2/986,0.2%	17/10188	MODERATE
4367b7b5-65c9-5b26-a554-7aeccd5ec933	chr4:g.39308736G>C	Single base substitution	synonymous_variant RFC1 L595L	2/986,0.2%	2/10188	LOW
4382e05e-3cbb-52b0-9a19-ee841daa7fe4	chr6:g.101889682C>T	Single base substitution	stop_gained GRIK2 R523*	2/986,0.2%	2/10188	HIGH
43881d05-2032-5cfa-b7c5-792e775d344d	chr7:g.73109922C>G	Single base substitution	non_coding_transcript_exon_variant SPDYE10P None	2/986,0.2%	6/10188	MODIFIER
439acba3-bc86-5061-a641-57988f73426b	chr6:g.11190902C>T	Single base substitution	missense_variant NEDD9 V323I	2/986,0.2%	3/10188	MODERATE
43cc3515-8025-5260-abcb-10cba71c5f0a	chr16:g.68801726C>T	Single base substitution	stop_gained CDH1 R74*	2/986,0.2%	2/10188	HIGH
43f536e1-3802-5853-b502-f26c5268625a	chr1:g.230843685C>T	Single base substitution	missense_variant C1orf198 R199Q	2/986,0.2%	4/10188	MODERATE
445c43a8-fbbf-5122-a5fb-3b022df9c2c7	chr4:g.82871986C>A	Single base substitution	missense_variant SEC31A R247L	2/986,0.2%	3/10188	MODERATE
4474fe74-1d8a-5107-9754-8fa958760bc4	chr17:g.61944389A>T	Single base substitution	3_prime_UTR_variant MED13 None	2/986,0.2%	3/10188	MODIFIER
44aedf3e-79a2-525b-b245-0a1d9a41f10c	chr9:g.105721537G>C	Single base substitution	missense_variant TMEM38B W90C	2/986,0.2%	2/10188	MODERATE
44b05b12-91b3-5899-a855-5aaf25eda6b2	chr17:g.8492484G>C	Single base substitution	missense_variant MYH10 S1464C	2/986,0.2%	2/10188	MODERATE
44c9a4cc-68bd-5e31-a31d-9854e5c25f9d	chr18:g.49974458G>A	Single base substitution	missense_variant MYO5B A405V	2/986,0.2%	2/10188	MODERATE
45937aa4-5b2c-55d4-a75c-97f104d159e8	chr6:g.131604216T>C	Single base substitution	missense_variant MED23 Y573C	2/986,0.2%	2/10188	MODERATE
45a5c127-39ff-5c0e-ba52-132bee33b5aa	chr6:g.130899569C>T	Single base substitution	synonymous_variant EPB41L2 S386S	2/986,0.2%	3/10188	LOW
45fa71f8-2afe-5906-8318-feb4b2e6972e	chr11:g.56137390G>A	Single base substitution	missense_variant OR8J3 S110L	2/986,0.2%	2/10188	MODERATE
46093e1b-14d4-59da-aa65-c049d57501b3	chr2:g.75701332_75701333insGTCTCTACTGTGTG	Small insertion	intron_variant GCFC2 None	2/986,0.2%	2/10188	MODIFIER
4663c6e6-aa87-5507-9e90-840a4292b01f	chr9:g.99132587_99132588insTACTC	Small insertion	frameshift_variant TGFBR1 M142Tfs*4	2/986,0.2%	2/10188	HIGH
468d95dc-0c05-5d0a-a00a-80647fb01e85	chr16:g.67036692G>A	Single base substitution	stop_gained CBFB W73*	2/986,0.2%	2/10188	HIGH
46c2de4f-2116-53ee-97dd-8ac0f84ef596	chr6:g.108680760delAAAAAAC	Small deletion	3_prime_UTR_variant FOXO3 None	2/986,0.2%	4/10188	MODIFIER
46e40ca5-735f-5900-8644-7f9d99556519	chr1:g.156959137G>A	Single base substitution	missense_variant ARHGEF11 R390C	2/986,0.2%	3/10188	MODERATE
46eba7cb-4a3a-5529-854a-96155f3a1709	chr7:g.77779461A>T	Single base substitution	3_prime_UTR_variant RSBN1L None	2/986,0.2%	2/10188	MODIFIER
4732db67-6b46-5d75-be8a-5e2274f84a51	chr11:g.57700415delATAT	Small deletion	3_prime_UTR_variant ZDHHC5 None	2/986,0.2%	7/10188	MODIFIER
475d569e-581d-55e5-9757-78d28898922b	chr3:g.195783335C>G	Single base substitution	missense_variant MUC4 D2749H	2/986,0.2%	2/10188	MODERATE
481488c9-5216-5de3-95da-f4a22f736be7	chr5:g.140843246C>G	Single base substitution	missense_variant PCDHA8 S642C	2/986,0.2%	4/10188	MODERATE
48437d13-b695-501d-b38c-0e8121b1304b	chr4:g.43030452G>A	Single base substitution	missense_variant GRXCR1 R262Q	2/986,0.2%	7/10188	MODERATE
488975fa-17c0-5b06-ba56-0d27c98c45c2	chr9:g.107487067T>G	Single base substitution	missense_variant KLF4 K409Q	2/986,0.2%	2/10188	MODERATE
48918ec3-705c-5868-b658-e41640e8c1f3	chr2:g.113577628G>A	Single base substitution	non_coding_transcript_exon_variant FAM138B None	2/986,0.2%	12/10188	MODIFIER
4903cb60-1edb-5ecc-b8dd-6158ab4cf150	chr8:g.63023989T>G	Single base substitution	synonymous_variant GGH T205T	2/986,0.2%	3/10188	LOW
4948bdb5-266f-50e3-8a7f-f343c0f32053	chr1:g.148483114G>A	Single base substitution	missense_variant PPIAL4G R47C	2/986,0.2%	2/10188	MODERATE
49616af4-41d1-5567-95c0-4c51720c0be8	chr14:g.104105368C>T	Single base substitution	missense_variant ASPG S364L	2/986,0.2%	4/10188	MODERATE
4b8540bc-78e5-57f8-ac80-dd515a1f14a2	chr12:g.114680977G>A	Single base substitution	missense_variant TBX3 H187Y	2/986,0.2%	2/10188	MODERATE
4b996d30-e19f-540c-ac9f-482738fc4b48	chr17:g.12113330delAA	Small deletion	frameshift_variant MAP2K4 D263Cfs*4	2/986,0.2%	3/10188	HIGH
4b99b184-9bd5-5f63-b522-fbf60c25644c	chr10:g.12167887G>A	Single base substitution	intron_variant NUDT5 None	2/986,0.2%	2/10188	MODIFIER
4bb5648a-6d51-5177-ada6-4c094f9bed19	chr13:g.100262751C>G	Single base substitution	missense_variant PCCA Q247E	2/986,0.2%	3/10188	MODERATE
4bd28133-e6e7-5e39-a983-ab3752134aed	chr19:g.56816338C>T	Single base substitution	missense_variant PEG3 E702K	2/986,0.2%	2/10188	MODERATE
4c1e41d5-dec5-5513-a0b2-b56e2ef36961	chr2:g.80647802G>A	Single base substitution	missense_variant CTNNA2 R931Q	2/986,0.2%	4/10188	MODERATE
4c2ba2df-cb2a-5711-8bb1-3775bd459da0	chr17:g.7673764C>T	Single base substitution	missense_variant TP53 E286K	2/986,0.2%	15/10188	MODERATE
4c32a9ca-57df-5630-81ef-76135e85485d	chr6:g.109980276C>T	Single base substitution	downstream_gene_variant GPR6 None	2/986,0.2%	2/10188	MODIFIER
4c5ca57b-f0c7-55ab-8852-eb4abcee8fe4	chr17:g.7673823C>T	Single base substitution	missense_variant TP53 G266E	2/986,0.2%	10/10188	MODERATE
4c862599-5f32-55b8-b216-4b7536190e35	chr13:g.30461159T>C	Single base substitution	3_prime_UTR_variant HMGB1 None	2/986,0.2%	10/10188	MODIFIER
4cfa5753-f663-5be3-b810-c73a1452cb77	chr10:g.47461770G>A	Single base substitution	3_prime_UTR_variant ANXA8 None	2/986,0.2%	8/10188	MODIFIER
4d223b09-e6e2-563c-9f25-14177248c884	chr8:g.42437370C>T	Single base substitution	missense_variant SLC20A2 R381H	2/986,0.2%	2/10188	MODERATE
4d700195-f496-582f-ac78-87580d709bfd	chr1:g.229635521C>T	Single base substitution	missense_variant URB2 S303L	2/986,0.2%	2/10188	MODERATE
4e2080a7-0b5b-5648-b036-637f9fa0455c	chr11:g.108365208C>T	Single base substitution	stop_gained ATM R2993*	2/986,0.2%	4/10188	HIGH
4e9fe041-26bc-5e25-9b86-9e7c29aac779	chr15:g.20541692T>A	Single base substitution	missense_variant GOLGA6L6 Q6H	2/986,0.2%	5/10188	MODERATE
4ed6549d-1328-5222-a7d1-284e53b7b57d	chr16:g.4652050A>G	Single base substitution	missense_variant MGRN1 R99G	2/986,0.2%	3/10188	MODERATE
4edad190-10e7-5927-ad99-aaf2780b0df7	chr1:g.206732725G>A	Single base substitution	3_prime_UTR_variant MAPKAPK2 None	2/986,0.2%	2/10188	MODIFIER
4f2cf785-91e4-5d49-bcc0-66f55590ae9b	chr2:g.208129787C>T	Single base substitution	synonymous_variant CRYGC G2G	2/986,0.2%	2/10188	LOW
4ff58c48-a3f1-513c-8aee-0e67a4d76749	chr1:g.212994772T>A	Single base substitution	3_prime_UTR_variant ANGEL2 None	2/986,0.2%	2/10188	MODIFIER
4ffb19b5-26e4-55e9-a35d-050425945329	chr15:g.41848575C>T	Single base substitution	3_prime_UTR_variant SPTBN5 None	2/986,0.2%	2/10188	MODIFIER
501f60c0-825e-513c-a719-372768d09678	chr4:g.89113094C>T	Single base substitution	synonymous_variant TIGD2 S40S	2/986,0.2%	2/10188	LOW
504e1ccf-6932-5b2d-b7aa-99803112efd3	chr12:g.108918088C>T	Single base substitution	synonymous_variant SVOP A435A	2/986,0.2%	2/10188	LOW
50752651-a05d-5273-8c50-61c9dfb6c59f	chr1:g.244842123delT	Small deletion	intron_variant COX20 None	2/986,0.2%	11/10188	MODIFIER
50880f60-113c-59ef-bc65-d6d4bd706006	chr8:g.108248673G>A	Single base substitution	synonymous_variant EIF3E I10I	2/986,0.2%	2/10188	LOW
50f98e48-8cae-50f2-9682-18b231277ca4	chr16:g.28752578G>A	Single base substitution	missense_variant NPIPB9 R4Q	2/986,0.2%	5/10188	MODERATE
50f9f973-f478-52fb-bbe6-c02d0f32da6b	chr2:g.44372792C>T	Single base substitution	missense_variant CAMKMT S72L	2/986,0.2%	3/10188	MODERATE
510b09c1-ff33-59b6-98fe-a14c24876bb7	chr19:g.35802234G>A	Single base substitution	synonymous_variant PRODH2 F461F	2/986,0.2%	2/10188	LOW
511ded0e-1804-5e63-89f1-4711df78c6ba	chr19:g.12318419A>T	Single base substitution	3_prime_UTR_variant ZNF563 None	2/986,0.2%	2/10188	MODIFIER
512f8816-b424-543e-ae57-c3766fd00461	chr1:g.185143947_185143948insAGGTCTCCTTT	Small insertion	frameshift_variant TRMT1L T248Efs*3	2/986,0.2%	2/10188	HIGH
5171c669-9966-5d46-93e5-4f7f7c137f77	chr16:g.11060948G>A	Single base substitution	missense_variant CLEC16A R681Q	2/986,0.2%	3/10188	MODERATE
521c1fa5-e281-53c6-96e6-5f34f2b10f50	chr1:g.182473775G>A	Single base substitution	missense_variant RGSL1 V222I	2/986,0.2%	2/10188	MODERATE
5244c208-30f5-52e9-afd6-452f8c12b534	chr12:g.284141A>T	Single base substitution	3_prime_UTR_variant KDM5A None	2/986,0.2%	2/10188	MODIFIER
5289bfba-b01a-587c-8d00-7d857a86d24a	chr5:g.140871292C>T	Single base substitution	missense_variant PCDHA11 A730V	2/986,0.2%	3/10188	MODERATE
5292208c-36ad-58be-807e-2d13cc50f249	chr2:g.127628415G>A	Single base substitution	missense_variant MYO7B E1476K	2/986,0.2%	2/10188	MODERATE
53000380-7d66-5c93-b50c-d6b281f1f833	chr1:g.113856428_113856429insT	Small insertion	frameshift_variant PTPN22 R165Kfs*4	2/986,0.2%	2/10188	HIGH
532f3555-bd0a-50a2-bff6-b460a64b6c67	chr21:g.25734946C>T	Single base substitution	5_prime_UTR_variant ATP5J None	2/986,0.2%	2/10188	MODIFIER
5340fdb9-d773-5ab0-8f4b-1726aa543c90	chrX:g.93671718C>T	Single base substitution	3_prime_UTR_variant NAP1L3 None	2/986,0.2%	2/10188	MODIFIER
536c461c-a479-55a1-9f87-bdb5af983176	chr15:g.84512370T>C	Single base substitution	upstream_gene_variant GOLGA6L5P None	2/986,0.2%	11/10188	MODIFIER
539a4e1e-0726-5e32-a725-4c453c450b85	chr11:g.73355622G>A	Single base substitution	synonymous_variant ARHGEF17 A1181A	2/986,0.2%	2/10188	LOW
53c7aa1c-74f2-554d-9759-dc834fc88ab7	chr22:g.23064045G>A	Single base substitution	synonymous_variant RSPH14 F170F	2/986,0.2%	3/10188	LOW
53fa0eb0-9eaf-54fd-88cd-478652436dae	chr10:g.79906701G>T	Single base substitution	non_coding_transcript_exon_variant MBL1P None	2/986,0.2%	2/10188	MODIFIER
5403f036-6e26-5762-b889-e15221cf8bbd	chr5:g.141409779G>A	Single base substitution	missense_variant PCDHGB6 R526H	2/986,0.2%	2/10188	MODERATE
5440595e-0754-5de3-a94c-75fb85f6550b	chr5:g.38504076G>C	Single base substitution	stop_gained LIFR S446*	2/986,0.2%	2/10188	HIGH
544bad6f-f366-50c6-af33-a6bd49d9bc9c	chr3:g.179218295A>G	Single base substitution	missense_variant PIK3CA E542G	2/986,0.2%	4/10188	MODERATE
54a031d8-27d0-515c-8c85-7fd712f81e6e	chr22:g.15721600C>A	Single base substitution	downstream_gene_variant POTEH None	2/986,0.2%	2/10188	MODIFIER
550834a3-50f8-53bb-9341-8d9946adc7b5	chr12:g.133204386delCTT	Small deletion	inframe_deletion ZNF268 F901del	2/986,0.2%	2/10188	MODERATE
5552ba8a-18e7-54d6-92a2-96be0bcfff6d	chrX:g.154928964_154928965insT	Small insertion	frameshift_variant F8 T1609Nfs*4	2/986,0.2%	3/10188	HIGH
559861e9-9628-5146-a9f2-62085a7a5934	chr10:g.47551880C>T	Single base substitution	upstream_gene_variant AGAP9 None	2/986,0.2%	4/10188	MODIFIER
55b490b1-c472-562d-9115-b38bf6517746	chr12:g.18093G>A	Single base substitution	upstream_gene_variant AC215219.2 None	2/986,0.2%	10/10188	MODIFIER
56e26ead-4be4-5166-8d72-542fc8e6857e	chr7:g.92041081A>T	Single base substitution	intron_variant AKAP9 None	2/986,0.2%	2/10188	MODIFIER
575eb228-1ae5-56ef-8a55-96b9b55f7aed	chr3:g.150703782T>C	Single base substitution	synonymous_variant ERICH6 E39E	2/986,0.2%	3/10188	LOW
57771d5e-69d9-564f-a206-a50bc9817780	chr7:g.81751849G>A	Single base substitution	intron_variant HGF None	2/986,0.2%	2/10188	MODIFIER
577b8475-acd3-597e-9a8f-f503cc1ed075	chr6:g.152483113G>A	Single base substitution	missense_variant SYNE1 T441M	2/986,0.2%	2/10188	MODERATE
5795235f-d8b4-59e5-a0f7-290eabc00c35	chr20:g.62139832C>T	Single base substitution	synonymous_variant PSMA7 E99E	2/986,0.2%	2/10188	LOW
57b9675a-c81f-5ac9-bf76-9405993043a6	chr5:g.56882632_56882633insA	Small insertion	frameshift_variant MAP3K1 T1145Nfs*6	2/986,0.2%	2/10188	HIGH
57c0984c-3ad5-5317-b5da-e0217ab047a4	chr1:g.11829288C>T	Single base substitution	missense_variant CLCN6 S405L	2/986,0.2%	2/10188	MODERATE
57c52e57-9278-50cd-a265-ec8e339083af	chr12:g.118033897A>T	Single base substitution	3_prime_UTR_variant WSB2 None	2/986,0.2%	3/10188	MODIFIER
57db36e4-8181-5339-beb2-ef08c008fd15	chr3:g.179234169G>A	Single base substitution	missense_variant PIK3CA M1004I	2/986,0.2%	2/10188	MODERATE
57dd501a-c977-5e21-a90f-b73a279ac721	chr21:g.14216238G>C	Single base substitution	missense_variant RBM11 E18Q	2/986,0.2%	2/10188	MODERATE
584f30ce-6796-59dd-8e54-10ae80c82ad5	chr7:g.31753086T>C	Single base substitution	3_prime_UTR_variant PDE1C None	2/986,0.2%	2/10188	MODIFIER
5874f769-cd2f-5f6b-bbf7-a2aa1f8dc0cf	chr3:g.105720244C>T	Single base substitution	missense_variant CBLB D404N	2/986,0.2%	2/10188	MODERATE
58bc3829-b1d5-5c53-9647-3b79ba53323d	chr15:g.82434267T>C	Single base substitution	missense_variant GOLGA6L9 C223R	2/986,0.2%	8/10188	MODERATE
58d9be06-21d6-53f4-aa9a-41692591f269	chr14:g.23042784G>A	Single base substitution	missense_variant PSMB11 V187M	2/986,0.2%	2/10188	MODERATE
59135116-dd07-54fc-b2d6-724015182561	chr1:g.247738656A>C	Single base substitution	missense_variant OR14K1 R14S	2/986,0.2%	19/10188	MODERATE
591b2a7c-d96e-5290-8723-f0e77e107e21	chr17:g.62737664G>A	Single base substitution	intron_variant MARCH10 None	2/986,0.2%	4/10188	MODIFIER
5984e5d1-d6ed-5a5e-8c25-e669b1c85447	chr6:g.136669373C>T	Single base substitution	missense_variant MAP3K5 E426K	2/986,0.2%	2/10188	MODERATE
59fe56fc-8864-53b4-846a-74d1ba298c6c	chr19:g.50876421T>C	Single base substitution	intron_variant KLK2 None	2/986,0.2%	2/10188	MODIFIER
5a188f60-b9a2-5311-b0cf-9aedd99ba36d	chr17:g.7670684C>G	Single base substitution	missense_variant TP53 R342P	2/986,0.2%	3/10188	MODERATE
5a45d1a8-3421-59d9-b5fc-b96167f714e6	chr10:g.8073911_8073912insT	Small insertion	frameshift_variant GATA3 P408Afs*99	2/986,0.2%	2/10188	HIGH
5b030503-d630-51ab-8918-747ab2007f0b	chr1:g.156767937C>G	Single base substitution	missense_variant PRCC Q56E	2/986,0.2%	3/10188	MODERATE
5b2a91dd-29e0-5397-974f-036eede1fb9c	chr17:g.56960986G>A	Single base substitution	stop_gained COIL Q12*	2/986,0.2%	2/10188	HIGH
5b329d62-c59b-5b96-adf8-da5309ef4856	chr1:g.247672269C>T	Single base substitution	missense_variant OR13G1 R258H	2/986,0.2%	2/10188	MODERATE
5b607f4d-6bf8-5e36-b769-a328a959b1ac	chr6:g.95586980_95586981insAATAG	Small insertion	stop_gained MANEA I181Kfs*2	2/986,0.2%	3/10188	HIGH
5c121e4b-0570-5050-9611-1159b6891e56	chr11:g.71800085C>T	Single base substitution	3_prime_UTR_variant FAM86C1 None	2/986,0.2%	5/10188	MODIFIER
5cad27ff-a64e-5e81-8eea-d4884c6e6774	chr7:g.152148495G>A	Single base substitution	stop_gained KMT2C R4478*	2/986,0.2%	4/10188	HIGH
5cdcfd46-9321-51b2-9c68-62713e2f72ca	chr4:g.113237160C>T	Single base substitution	synonymous_variant ANK2 D219D	2/986,0.2%	2/10188	LOW
5d208cfc-6611-5d3f-be7f-8d57891c3fa3	chr9:g.137816012G>A	Single base substitution	synonymous_variant EHMT1 A1108A	2/986,0.2%	3/10188	LOW
5dba1d48-680f-5f38-a397-9f09b5d13c8e	chr7:g.6791975C>T	Single base substitution	synonymous_variant RSPH10B2 I737I	2/986,0.2%	2/10188	LOW
5de39328-27d9-5253-b594-6bad93650d53	chr15:g.61854524G>A	Single base substitution	missense_variant VPS13C T3732M	2/986,0.2%	2/10188	MODERATE
5e4cf4cc-402d-5c3c-abe1-c0c9def960c8	chr17:g.7675237C>T	Single base substitution	splice_acceptor_variant TP53 X126_splice	2/986,0.2%	15/10188	HIGH
5efae7db-2dd1-56ae-82c1-fe0021aef045	chr6:g.26198880C>G	Single base substitution	missense_variant HIST1H2AD E122Q	2/986,0.2%	3/10188	MODERATE
5efeaa33-d57e-5e9c-82d6-681534a9152c	chr7:g.73203446A>G	Single base substitution	non_coding_transcript_exon_variant RP11-396K3.1 None	2/986,0.2%	4/10188	MODIFIER
5f039915-472f-51ee-9db2-73d208beb004	chr1:g.240811922A>C	Single base substitution	missense_variant RGS7 L360V	2/986,0.2%	3/10188	MODERATE
5f067a98-44b1-5976-97e8-e9681e6de0ce	chr17:g.12125321C>T	Single base substitution	stop_gained MAP2K4 R281*	2/986,0.2%	3/10188	HIGH
5f0734cc-081f-5f5f-975c-6845bd89ea3f	chr14:g.64052036_64052037insT	Small insertion	frameshift_variant SYNE2 K2710Efs*19	2/986,0.2%	2/10188	HIGH
5f3a5631-d53f-54e9-9637-72e3d37ea0d5	chr6:g.150733903G>A	Single base substitution	synonymous_variant PLEKHG1 T74T	2/986,0.2%	2/10188	LOW
5f95de1d-bf34-5bb3-9e59-e40fcf9d52db	chr3:g.140175986C>T	Single base substitution	missense_variant CLSTN2 H49Y	2/986,0.2%	2/10188	MODERATE
5fc758ae-b984-5a37-ba01-ddb6e6336c43	chr4:g.1237629C>T	Single base substitution	intron_variant CTBP1 None	2/986,0.2%	5/10188	MODIFIER
5fcc02e5-7d1a-561e-9b60-f8a86418bdb8	chr11:g.73976660C>T	Single base substitution	synonymous_variant UCP2 L205L	2/986,0.2%	2/10188	LOW
60135987-2b21-54f1-8652-2b8d37874da0	chr17:g.7673781C>G	Single base substitution	missense_variant TP53 R280T	2/986,0.2%	18/10188	MODERATE
60d01258-f8d9-5293-a895-6310b2b25327	chr1:g.56792765_56792766insGAT	Small insertion	protein_altering_variant C1orf168 F16delinsLS	2/986,0.2%	3/10188	MODERATE
60d435dc-9594-523a-a5f2-83b20092eae2	chr2:g.38298478_38298479insGGTTTTTTAGTGACTAATC	Small insertion	frameshift_variant ATL2 K433Rfs*13	2/986,0.2%	3/10188	HIGH
61014f46-b8fd-5b4c-80d5-3983d86566c3	chr2:g.160200111C>T	Single base substitution	5_prime_UTR_variant ITGB6 None	2/986,0.2%	2/10188	MODIFIER
61939ee5-2b01-5ef8-ab65-f45ce31e0f28	chr20:g.31665881C>T	Single base substitution	3_prime_UTR_variant BCL2L1 None	2/986,0.2%	2/10188	MODIFIER
62b18d13-07e6-5759-ac0e-4e8f4611dc62	chr9:g.81915560C>T	Single base substitution	non_coding_transcript_exon_variant SPATA31D5P None	2/986,0.2%	3/10188	MODIFIER
62e86856-d7c9-509c-9058-1b2892249538	chr1:g.156946156C>T	Single base substitution	missense_variant ARHGEF11 E861K	2/986,0.2%	2/10188	MODERATE
6367676c-fadb-525c-95a2-50d132e88b85	chr3:g.30693848C>T	Single base substitution	3_prime_UTR_variant TGFBR2 None	2/986,0.2%	3/10188	MODIFIER
63b5bd3f-a067-58be-b7b4-2ba30ff56bf3	chr2:g.26484516G>A	Single base substitution	missense_variant OTOF T388M	2/986,0.2%	2/10188	MODERATE
64e6fe48-20fc-5d65-a628-f1f773b18dd9	chr17:g.7675124T>C	Single base substitution	missense_variant TP53 Y163C	2/986,0.2%	26/10188	MODERATE
6501de62-c08a-58f0-a93c-49c2194bfe84	chr6:g.169239624G>C	Single base substitution	synonymous_variant THBS2 G368G	2/986,0.2%	2/10188	LOW
651bab6a-283a-588c-ae5e-3af8557c474e	chr5:g.154409559G>A	Single base substitution	missense_variant GALNT10 E395K	2/986,0.2%	2/10188	MODERATE
6526c4a5-3402-5681-ba85-517110838abf	chr17:g.7676046delC	Small deletion	frameshift_variant TP53 G108Vfs*15	2/986,0.2%	3/10188	HIGH
659a291e-6b9d-5367-92c8-cf7248ce6d85	chr3:g.195779637G>A	Single base substitution	synonymous_variant MUC4 H3981H	2/986,0.2%	6/10188	LOW
65a27c8a-fd9a-5e2b-ad33-0b913d111a70	chrX:g.70259201G>A	Single base substitution	missense_variant P2RY4 R142W	2/986,0.2%	3/10188	MODERATE
65d8ff75-0dd3-575d-95bc-bb133f024bbc	chr13:g.46705129G>A	Single base substitution	missense_variant LRCH1 A488T	2/986,0.2%	2/10188	MODERATE
65e944c9-7721-5bc1-b45e-f742a0714b6c	chr2:g.95893563_95893564insAGTAAGGG	Small insertion	intron_variant ANKRD36C None	2/986,0.2%	2/10188	MODIFIER
66041458-bb18-580b-8c72-f827bb70e288	chr12:g.22524531C>T	Single base substitution	missense_variant C2CD5 R181Q	2/986,0.2%	12/10188	MODERATE
66614c10-87b2-5691-940b-fb68e00cfbdc	chr3:g.152300136T>A	Single base substitution	5_prime_UTR_variant MBNL1 None	2/986,0.2%	2/10188	MODIFIER
666985ad-b12e-5eb5-88bf-43d646d85dbc	chr16:g.68815760G>A	Single base substitution	splice_donor_variant CDH1 X522_splice	2/986,0.2%	2/10188	HIGH
66f28e01-d4b4-570d-95c8-ec3b21eb6210	chrX:g.149546788C>G	Single base substitution	synonymous_variant CXorf40A P101P	2/986,0.2%	2/10188	LOW
6717ad9d-f068-5cf8-bb5b-c241d27ab2bf	chr12:g.130371668delT	Small deletion	3_prime_UTR_variant PIWIL1 None	2/986,0.2%	30/10188	MODIFIER
673b7476-2237-531d-9591-679418f98c3f	chr9:g.101671085_101671086insATATTGTAGG	Small insertion	frameshift_variant GRIN3A R443Pfs*4	2/986,0.2%	2/10188	HIGH
67ecb074-a159-56a6-a630-ad85fbe16e5c	chr1:g.205935748C>G	Single base substitution	missense_variant SLC26A9 E25Q	2/986,0.2%	2/10188	MODERATE
6807f629-8c39-5246-b980-6a1d20114a69	chr2:g.130690216G>A	Single base substitution	downstream_gene_variant CYP4F30P None	2/986,0.2%	6/10188	MODIFIER
68459fc6-fbe0-59e8-9bfc-176e953d6052	chr1:g.246851436C>T	Single base substitution	missense_variant AHCTF1 E1533K	2/986,0.2%	2/10188	MODERATE
686b54e3-3046-5706-b231-9176402e85fe	chrX:g.32362797C>G	Single base substitution	missense_variant DMD K1772N	2/986,0.2%	2/10188	MODERATE
689b3bd3-e498-5d7b-b580-1d202aa8fd62	chr3:g.142383406C>T	Single base substitution	missense_variant XRN1 R837Q	2/986,0.2%	3/10188	MODERATE
6aaec8a7-ec03-5ee7-98a6-cf9cb729e168	chr1:g.160041096G>C	Single base substitution	3_prime_UTR_variant KCNJ10 None	2/986,0.2%	2/10188	MODIFIER
6adb7511-1117-5319-9d7e-446b57ee4632	chr6:g.87259788delAG	Small deletion	frameshift_variant ZNF292 E2054Kfs*14	2/986,0.2%	2/10188	HIGH
6bc6282c-05f6-51fe-8753-9b17de4cd3ce	chr19:g.54337571C>T	Single base substitution	missense_variant LILRA4 D261N	2/986,0.2%	2/10188	MODERATE
6bce860f-7096-5269-99c2-a40001f53315	chr17:g.7675218T>C	Single base substitution	missense_variant TP53 K132E	2/986,0.2%	6/10188	MODERATE
6c76f693-3e1d-5da8-84b2-05ebfba238e8	chr3:g.195778903G>A	Single base substitution	missense_variant MUC4 P4226L	2/986,0.2%	3/10188	MODERATE
6d1265ee-38b8-5b50-8dd0-80e271e249c4	chr3:g.179199148G>A	Single base substitution	missense_variant PIK3CA R108H	2/986,0.2%	19/10188	MODERATE
6d6c18fc-cc37-5788-b934-fddc927008e9	chr3:g.195784346C>T	Single base substitution	missense_variant MUC4 G2412S	2/986,0.2%	7/10188	MODERATE
6e24fe1e-d9fa-5bc3-9126-b498d41e9441	chr22:g.21184012A>G	Single base substitution	non_coding_transcript_exon_variant FAM230B None	2/986,0.2%	4/10188	MODIFIER
6e530dc4-3454-521b-9022-50598fa0d8e1	chr15:g.52225518G>A	Single base substitution	synonymous_variant MYO5C F1074F	2/986,0.2%	7/10188	LOW
6f93ccb4-6f8d-590d-aeeb-01510c7efea9	chr22:g.21184168A>G	Single base substitution	non_coding_transcript_exon_variant FAM230B None	2/986,0.2%	5/10188	MODIFIER
6fe08a03-ad6c-5f53-8326-4a02c12bbd61	chr7:g.38239882A>G	Single base substitution	3_prime_UTR_variant TRGC2 None	2/986,0.2%	6/10188	MODIFIER
7033546d-accd-5dda-a6db-90759cede119	chr7:g.25226959delT	Small deletion	frameshift_variant NPVF N69Mfs*5	2/986,0.2%	3/10188	HIGH
70a0c265-2397-5057-84b4-2798266e7c6a	chr14:g.106129587C>T	Single base substitution	missense_variant IGHV3-13 M101I	2/986,0.2%	2/10188	MODERATE
70bf045e-3513-532d-a573-14cd66f7005f	chr11:g.65297143G>A	Single base substitution	synonymous_variant POLA2 V557V	2/986,0.2%	2/10188	LOW
71d33732-ddc3-5e5f-95b2-dd240a2e0d53	chr22:g.41149095C>T	Single base substitution	stop_gained EP300 Q767*	2/986,0.2%	2/10188	HIGH
71f013b1-5f85-50fd-85d7-caa920bd51e0	chr3:g.14684366C>T	Single base substitution	synonymous_variant C3orf20 S203S	2/986,0.2%	2/10188	LOW
72af7a4b-f00a-5358-b391-e01debf5fa50	chr5:g.35013026C>T	Single base substitution	synonymous_variant AGXT2 A372A	2/986,0.2%	5/10188	LOW
72e5e923-4a46-5d01-aa05-5b53f42cb96a	chr17:g.7674935C>A	Single base substitution	missense_variant TP53 G199V	2/986,0.2%	5/10188	MODERATE
72f98b34-287f-5e52-b7fb-6363788ca5ff	chr11:g.10853139G>A	Single base substitution	stop_gained ZBED5 Q603*	2/986,0.2%	2/10188	HIGH
7313e3b5-4168-5f6f-801a-1956a070ac37	chr6:g.31164465C>T	Single base substitution	3_prime_UTR_variant POU5F1 None	2/986,0.2%	2/10188	MODIFIER
73140e18-4686-5a1e-9870-7329341140c7	chr3:g.186268802G>A	Single base substitution	missense_variant DGKG T372M	2/986,0.2%	3/10188	MODERATE
7322e112-15a4-583b-b2e7-c5c45796a673	chr9:g.85589630G>A	Single base substitution	missense_variant AGTPBP1 R874W	2/986,0.2%	5/10188	MODERATE
73ad29c9-ac01-5fd2-a3c0-9be4704bea32	chr8:g.112301862G>A	Single base substitution	missense_variant CSMD3 L2791F	2/986,0.2%	2/10188	MODERATE
7407d390-b1a1-53df-af72-d58e5fdd95d5	chr2:g.196732739delT	Small deletion	3_prime_UTR_variant CCDC150 None	2/986,0.2%	3/10188	MODIFIER
7477ba7a-bb47-5767-a6a6-067999010f88	chr3:g.179230256A>G	Single base substitution	missense_variant PIK3CA D939G	2/986,0.2%	4/10188	MODERATE
759aa600-9419-5446-8980-735ef23a703b	chr3:g.14667104T>A	Single base substitution	intron_variant CCDC174 None	2/986,0.2%	4/10188	MODIFIER
75b5f52c-5095-5b85-af33-5a8182defa3b	chr10:g.51698082G>A	Single base substitution	stop_gained CSTF2T Q490*	2/986,0.2%	2/10188	HIGH
75e7b793-6c28-54b5-bc5c-f26eafa0a20c	chr4:g.39062858G>A	Single base substitution	missense_variant KLHL5 R115Q	2/986,0.2%	4/10188	MODERATE
761f9a9c-5e55-5af9-a0e6-6cdd251c970b	chr7:g.137015034G>A	Single base substitution	missense_variant CHRM2 V57I	2/986,0.2%	3/10188	MODERATE
762ecabf-1748-5756-9dd1-777a8acd14f6	chr18:g.48040714delC	Small deletion	frameshift_variant ZBTB7C D132Tfs*90	2/986,0.2%	13/10188	HIGH
763a8e90-9ff7-51a3-bb9f-f2255faae75f	chr9:g.91724309A>G	Single base substitution	missense_variant ROR2 W729R	2/986,0.2%	2/10188	MODERATE
7671e837-83ff-5894-9e90-87a6fb8a8220	chr4:g.165041006G>C	Single base substitution	missense_variant TRIM60 E312Q	2/986,0.2%	2/10188	MODERATE
76e3f262-4f08-5944-95f8-ff6ca9d4c73a	chr11:g.59859143C>G	Single base substitution	missense_variant TCN1 K227N	2/986,0.2%	2/10188	MODERATE
77016ba7-8f28-52e2-8270-b8d1e4172127	chr9:g.68247761A>G	Single base substitution	intron_variant CBWD3 None	2/986,0.2%	6/10188	MODIFIER
77819ee0-524b-5043-8bb8-64f7df465026	chr3:g.195782805C>G	Single base substitution	missense_variant MUC4 Q2925H	2/986,0.2%	3/10188	MODERATE
78066279-06cf-5b55-bc10-10eeba4ec015	chr1:g.6197725delT	Small deletion	frameshift_variant RPL22 K15Rfs*5	2/986,0.2%	93/10188	HIGH
7837a593-4a2d-5353-919a-a831b60c5eeb	chr15:g.80457938C>T	Single base substitution	synonymous_variant ARNT2 F52F	2/986,0.2%	4/10188	LOW
7866484a-e5ed-51d1-8308-bdc27fea9440	chr8:g.109442980_109442981insTGGGGGAAAGACTGGTAGGAAGA	Small insertion	stop_gained PKHD1L1 H1477Wfs*6	2/986,0.2%	3/10188	HIGH
78eb09d0-4626-5533-be2f-962c20cdbec2	chr7:g.66092601C>G	Single base substitution	missense_variant ASL F396L	2/986,0.2%	2/10188	MODERATE
791bb9a5-1240-5579-ab99-7b9788adba67	chr1:g.15932874G>A	Single base substitution	missense_variant SPEN E2212K	2/986,0.2%	2/10188	MODERATE
79a0bbff-a29b-5700-a87c-1f7523e0bdc7	chr5:g.141383365G>A	Single base substitution	missense_variant PCDHGA7 E156K	2/986,0.2%	3/10188	MODERATE
7af8314c-a5ef-59f6-b4a2-a33604539fe7	chr5:g.80455622G>A	Single base substitution	intron_variant ZFYVE16 None	2/986,0.2%	2/10188	MODIFIER
7b365a18-91ca-55c5-9136-89f93c3932db	chr15:g.82345252T>A	Single base substitution	missense_variant GOLGA6L10 E203V	2/986,0.2%	14/10188	MODERATE
7b821811-4ce8-5661-95fd-fb0da8c4e6fb	chr7:g.152194515G>A	Single base substitution	stop_gained KMT2C Q1478*	2/986,0.2%	2/10188	HIGH
7b8b1f59-5012-59bb-bf8a-b7a7f57e2470	chr16:g.89630441G>T	Single base substitution	missense_variant DPEP1 V11L	2/986,0.2%	2/10188	MODERATE
7bcabdc7-0e10-51a6-87b7-8e2ac0393ee3	chr1:g.114680390G>A	Single base substitution	synonymous_variant AMPD1 D245D	2/986,0.2%	2/10188	LOW
7bd5d6d8-ee2d-5bda-a978-8719aeeaa88e	chr12:g.123673612C>T	Single base substitution	splice_region_variant TCTN2 None	2/986,0.2%	2/10188	LOW
7c05258f-b394-5198-85c0-12852fb42b38	chr18:g.47841840G>C	Single base substitution	stop_gained SMAD2 S464*	2/986,0.2%	9/10188	HIGH
7c3f20f2-5282-50bc-adb0-5c44b97d3aa0	chr15:g.30410205C>T	Single base substitution	intron_variant GOLGA8R None	2/986,0.2%	2/10188	MODIFIER
7c508507-ba1b-59a1-992d-677077ce92f1	chr1:g.170726389C>T	Single base substitution	missense_variant PRRX1 A196V	2/986,0.2%	2/10188	MODERATE
7cd90d9f-463f-52ae-9dd3-f55809dd207c	chr11:g.2317875G>A	Single base substitution	missense_variant TSPAN32 R305K	2/986,0.2%	2/10188	MODERATE
7cdef839-d718-5814-875f-b3c004d6d974	chr22:g.21183903G>T	Single base substitution	non_coding_transcript_exon_variant FAM230B None	2/986,0.2%	3/10188	MODIFIER
7ce74aa6-6d49-5767-83bf-2bc739741a41	chrX:g.134991248C>T	Single base substitution	synonymous_variant SMIM10 L51L	2/986,0.2%	2/10188	LOW
7d153f71-d19e-5b1d-8d73-8b7590ffc5b9	chr8:g.85660933A>C	Single base substitution	non_coding_transcript_exon_variant REXO1L1P None	2/986,0.2%	4/10188	MODIFIER
7d35138f-c97a-546b-9bd6-ed8b26c94d61	chr16:g.11802C>A	Single base substitution	non_coding_transcript_exon_variant DDX11L10 None	2/986,0.2%	2/10188	MODIFIER
7dc59454-06b7-5ca9-a1dc-0ec6cb000b30	chr11:g.59206510delTATA	Small deletion	3_prime_UTR_variant DTX4 None	2/986,0.2%	17/10188	MODIFIER
7de9450d-8d5a-5e27-ad97-1ee436410075	chr21:g.34880697_34880698insCC	Small insertion	frameshift_variant RUNX1 D96Gfs*11	2/986,0.2%	3/10188	HIGH
7de9ea00-7e7e-587c-ab4b-f65fba577a68	chr19:g.8962921C>T	Single base substitution	missense_variant MUC16 E4617K	2/986,0.2%	2/10188	MODERATE
7df1b58e-df57-5813-8a4b-f405cd3d67b1	chr9:g.62804060T>G	Single base substitution	non_coding_transcript_exon_variant LINC01410 None	2/986,0.2%	9/10188	MODIFIER
7e20c462-a850-506b-af05-c8c46ead017a	chr17:g.7674887C>A	Single base substitution	missense_variant TP53 S215I	2/986,0.2%	6/10188	MODERATE
7e558b9e-3d0b-5ead-9895-02a239c03c8c	chrX:g.70201972T>G	Single base substitution	synonymous_variant DGAT2L6 G185G	2/986,0.2%	3/10188	LOW
7e6716dd-fbf8-54c4-958e-7cf7ae6c27b0	chrX:g.153779224A>C	Single base substitution	3_prime_UTR_variant PLXNB3 None	2/986,0.2%	2/10188	MODIFIER
7ea42bda-cf68-5a85-adae-23da4471f7c4	chr1:g.155325191delG	Small deletion	intron_variant RUSC1 None	2/986,0.2%	6/10188	MODIFIER
7f0c5dfd-4e0f-53a0-9865-a27e4f8654ad	chr22:g.18370388G>A	Single base substitution	non_coding_transcript_exon_variant AC011718.2 None	2/986,0.2%	12/10188	MODIFIER
7f4e466b-062a-57a4-945f-9464c9cef21a	chr12:g.57479211G>A	Single base substitution	missense_variant ARHGAP9 R66C	2/986,0.2%	7/10188	MODERATE
7ffd4b91-24df-5091-90c3-635e02e5915a	chr6:g.152011697G>C	Single base substitution	missense_variant ESR1 E380Q	2/986,0.2%	2/10188	MODERATE
802b9372-f99d-5157-93e8-eca9a5521df6	chr2:g.73089011T>G	Single base substitution	missense_variant RAB11FIP5 T246P	2/986,0.2%	2/10188	MODERATE
807a9e5f-e361-5482-b112-c9ba9951b45f	chr3:g.33152561T>A	Single base substitution	3_prime_UTR_variant SUSD5 None	2/986,0.2%	2/10188	MODIFIER
80b15c95-39bc-5334-b2c7-a0d30530ae75	chr1:g.26864366C>T	Single base substitution	3_prime_UTR_variant SFN None	2/986,0.2%	67/10188	MODIFIER
814bf349-9cd3-5c28-96e5-0aaaa4c276b6	chr20:g.18316702C>G	Single base substitution	synonymous_variant ZNF133 L617L	2/986,0.2%	3/10188	LOW
819c50e7-fa7e-5787-9df3-6e3391cb3363	chr20:g.18449013C>T	Single base substitution	missense_variant DZANK1 M200I	2/986,0.2%	2/10188	MODERATE
81a88c14-d585-5e11-9c88-017655cb0cdd	chr4:g.117085073C>T	Single base substitution	synonymous_variant TRAM1L1 K107K	2/986,0.2%	2/10188	LOW
823043ea-2ef3-5d49-9660-ae4267d8d951	chr11:g.1097286C>T	Single base substitution	non_coding_transcript_exon_variant MUC2 None	2/986,0.2%	2/10188	MODIFIER
82424819-c8a2-5142-bd8c-bad0d7eb4cd0	chr17:g.7674250C>T	Single base substitution	missense_variant TP53 C238Y	2/986,0.2%	15/10188	MODERATE
82f8fb12-e748-5711-bce5-fab5fd2011de	chr4:g.9368864C>T	Single base substitution	downstream_gene_variant USP17L15 None	2/986,0.2%	5/10188	MODIFIER
8335336c-f1e6-583e-a078-b88c42eafeb6	chr12:g.55248121T>A	Single base substitution	synonymous_variant OR6C74 S278S	2/986,0.2%	2/10188	LOW
8391c7a0-a40a-59c0-a89c-b48536b5b14b	chr19:g.48282461G>A	Single base substitution	missense_variant ZNF114 V34M	2/986,0.2%	2/10188	MODERATE
83e41caa-bd76-5cde-940e-595d5e374cd3	chr12:g.76764199C>T	Single base substitution	5_prime_UTR_variant ZDHHC17 None	2/986,0.2%	2/10188	MODIFIER
83eabeea-c43b-5a4c-a2b2-5cf92547ede1	chr6:g.56498001_56498002insGAAACTGACAGTGTTTATGGCCCCAACTTAAAACTGCC	Small insertion	stop_gained DST K4393Rfs*4	2/986,0.2%	2/10188	HIGH
843df66f-3730-57f9-8d35-585f22d89c32	chr9:g.97307744C>T	Single base substitution	5_prime_UTR_variant CCDC180 None	2/986,0.2%	3/10188	MODIFIER
854a83c6-5e61-54d9-9824-33f385c337dc	chr4:g.141234102_141234103insACA	Small insertion	3_prime_UTR_variant ZNF330 None	2/986,0.2%	2/10188	MODIFIER
857fabd3-99ae-5d71-a6ee-df6dfe6b0b78	chr17:g.7673704G>A	Single base substitution	stop_gained TP53 R306*	2/986,0.2%	33/10188	HIGH
859262e9-7030-50bf-ada1-eb3bce56ffb0	chr1:g.114876769G>A	Single base substitution	missense_variant SYCP1 E254K	2/986,0.2%	2/10188	MODERATE
860bf570-27f2-52b4-92d7-850539509f7a	chr1:g.35115317T>C	Single base substitution	3_prime_UTR_variant ZMYM1 None	2/986,0.2%	4/10188	MODIFIER
866b0080-8033-5b58-a520-5c988c2ca8ca	chr2:g.68042836G>A	Single base substitution	3_prime_UTR_variant C1D None	2/986,0.2%	3/10188	MODIFIER
86cc0453-ccd6-55e8-94b9-b0ce12d3cb55	chr11:g.121555273C>T	Single base substitution	synonymous_variant SORL1 L842L	2/986,0.2%	2/10188	LOW
890c5d12-acd5-54c3-94f7-bfd19129c50f	chr17:g.63862360G>A	Single base substitution	non_coding_transcript_exon_variant TCAM1P None	2/986,0.2%	8/10188	MODIFIER
8952ec85-0b54-550c-8e29-ef4c2163e5cd	chr12:g.46769410_46769411insATTATTA	Small insertion	stop_gained SLC38A4 T440*	2/986,0.2%	2/10188	HIGH
895a65b5-23ba-5a4c-a8c7-dae0630d490f	chr1:g.109415307C>T	Single base substitution	synonymous_variant PSMA5 E51E	2/986,0.2%	2/10188	LOW
89a72b15-cee2-5843-94ae-4a30c2ea46b2	chr17:g.7673740C>A	Single base substitution	stop_gained TP53 E294*	2/986,0.2%	16/10188	HIGH
89a92ab8-247c-585f-8cfb-241e6c6cb9e5	chr2:g.174847037_174847038insTT	Small insertion	intron_variant CHN1 None	2/986,0.2%	3/10188	MODIFIER
8a722267-c04d-55c6-85bf-ba509ef9d397	chr4:g.186620407G>A	Single base substitution	missense_variant FAT1 S2060F	2/986,0.2%	2/10188	MODERATE
8b20d2c9-2c4a-5556-90e6-09f387363861	chr6:g.85622634delTG	Small deletion	frameshift_variant SYNCRIP N285Kfs*7	2/986,0.2%	2/10188	HIGH
8d7884da-b324-573f-a8ea-1febeee9740a	chr14:g.37592107T>C	Single base substitution	missense_variant FOXA1 D226G	2/986,0.2%	3/10188	MODERATE
8d7a407d-32a6-5b8a-8376-d662e30c7c0b	chr19:g.37669336G>C	Single base substitution	synonymous_variant ZNF781 L271L	2/986,0.2%	2/10188	LOW
8d861870-c866-584d-956f-e1ff69575170	chr17:g.18512614G>A	Single base substitution	non_coding_transcript_exon_variant CTD-2303H24.2 None	2/986,0.2%	5/10188	MODIFIER
8dbe5323-6ba0-59cb-9744-762eedb9b8ae	chr8:g.85341635delT	Small deletion	frameshift_variant CA1 M1?	2/986,0.2%	5/10188	HIGH
8dc3fbab-035e-5158-91a9-998a438258e0	chr5:g.161546674C>A	Single base substitution	5_prime_UTR_variant GABRB2 None	2/986,0.2%	2/10188	MODIFIER
8dd1d711-f81a-534e-8651-d177f086f013	chr1:g.155319905C>G	Single base substitution	missense_variant FDPS P346A	2/986,0.2%	2/10188	MODERATE
8df018d6-4cfd-53d9-ade2-7c79b5a71f45	chr10:g.87958013delA	Small deletion	frameshift_variant PTEN K267Rfs*9	2/986,0.2%	26/10188	HIGH
8e06b48e-1408-5871-9d05-b30968b3ae20	chr14:g.23394213G>A	Single base substitution	missense_variant MYH6 T847M	2/986,0.2%	5/10188	MODERATE
8e45704d-f821-5e68-ac4c-ba8a4e62f4f6	chr2:g.8858286A>G	Single base substitution	3_prime_UTR_variant MBOAT2 None	2/986,0.2%	4/10188	MODIFIER
8ed53d77-90bb-51a9-9823-ecf162cb91b9	chr9:g.12702411delACAA	Small deletion	frameshift_variant TYRP1 N353Vfs*31	2/986,0.2%	13/10188	HIGH
8f315fe0-e10d-50b4-8307-18260f616fc1	chr16:g.3023235G>C	Single base substitution	splice_region_variant HCFC1R1 L93L	2/986,0.2%	2/10188	LOW
8f70e65d-8646-5789-845d-a9d288c3f66f	chr1:g.159835151G>A	Single base substitution	3_prime_UTR_variant C1orf204 None	2/986,0.2%	2/10188	MODIFIER
904d2aa2-7698-55cd-8096-b12787a28bea	chr22:g.18370572T>C	Single base substitution	non_coding_transcript_exon_variant AC011718.2 None	2/986,0.2%	2/10188	MODIFIER
905562d7-5d02-5076-a176-afc241983ee9	chr11:g.89717842C>G	Single base substitution	synonymous_variant TRIM77 L441L	2/986,0.2%	2/10188	LOW
914fdbef-fe59-5f37-9d26-1a959f2c6ef5	chr13:g.113667442G>A	Single base substitution	missense_variant GRK1 R19Q	2/986,0.2%	2/10188	MODERATE
9222d6fa-247e-5fcc-baba-ee1bdd4a4330	chr2:g.32251002G>A	Single base substitution	missense_variant NLRC4 R288W	2/986,0.2%	2/10188	MODERATE
92601e86-b9bb-5c66-8e1c-210756fb6902	chr20:g.24949463C>T	Single base substitution	5_prime_UTR_variant CST7 None	2/986,0.2%	4/10188	MODIFIER
92c3efd2-b635-5f04-b46c-b681117eb66f	chr1:g.148117657C>T	Single base substitution	synonymous_variant NBPF11 P407P	2/986,0.2%	3/10188	LOW
93a17c17-295f-5121-9a16-238e7e1963cc	chrX:g.105905339G>A	Single base substitution	missense_variant NRK G281R	2/986,0.2%	2/10188	MODERATE
93bcf15c-6e20-548d-8540-2ad390e27f2e	chr3:g.195779499T>G	Single base substitution	synonymous_variant MUC4 T4027T	2/986,0.2%	5/10188	LOW
93d0bed3-8785-5b3d-b03c-7b97d47028e1	chr4:g.141234101_141234102insAGACAAG	Small insertion	3_prime_UTR_variant ZNF330 None	2/986,0.2%	4/10188	MODIFIER
956da5e2-55b1-5ea0-b15f-31ceb59691a5	chr15:g.101759784C>T	Single base substitution	non_coding_transcript_exon_variant DNM1P47 None	2/986,0.2%	2/10188	MODIFIER
9615ee9a-0a68-5ab9-82d5-a025164037c6	chr1:g.146140007C>T	Single base substitution	missense_variant NBPF10 A194T	2/986,0.2%	13/10188	MODERATE
963ad4ee-4d51-543b-b059-bc71eb62438e	chr16:g.2038416T>C	Single base substitution	3_prime_UTR_variant SLC9A3R2 None	2/986,0.2%	6/10188	MODIFIER
966c4ecb-33ac-52dc-aabf-89d369d54122	chr10:g.88941238C>T	Single base substitution	missense_variant ACTA2 V203I	2/986,0.2%	5/10188	MODERATE
968984fd-ab27-54a6-9dde-5bc77b12d6e6	chr5:g.146131125delA	Small deletion	intron_variant LARS None	2/986,0.2%	9/10188	MODIFIER
96aab336-e138-5b61-9b60-f01aa6d4d40b	chr19:g.52067315C>G	Single base substitution	missense_variant ZNF841 Q73H	2/986,0.2%	4/10188	MODERATE
96bd5e1a-91c5-5b4c-aabc-a546a1487ef8	chr3:g.179199156delAAG	Small deletion	inframe_deletion PIK3CA K111del	2/986,0.2%	2/10188	MODERATE
96f88667-9894-57e5-ad7a-f7907aecc889	chr17:g.7673788G>T	Single base substitution	missense_variant TP53 P278T	2/986,0.2%	6/10188	MODERATE
97ee8efb-de62-5003-8163-9c6327be6d7f	chr21:g.34880559_34880560insT	Small insertion	frameshift_variant RUNX1 R142Kfs*44	2/986,0.2%	2/10188	HIGH
980ca278-03cd-5d06-8ad2-a150cb4e44bb	chr3:g.12405986C>G	Single base substitution	missense_variant PPARG L242V	2/986,0.2%	2/10188	MODERATE
98e46bea-e7c1-59f6-ba4c-26d96dfc5e0c	chr16:g.50323649C>T	Single base substitution	missense_variant BRD7 D461N	2/986,0.2%	2/10188	MODERATE
98f1f1a1-ada5-5123-81d0-13677cedf434	chr12:g.99779904G>C	Single base substitution	missense_variant ANKS1B Q272E	2/986,0.2%	2/10188	MODERATE
998eb24f-2264-5632-b7f9-dfc3662c70d7	chr3:g.195780658A>G	Single base substitution	missense_variant MUC4 V3641A	2/986,0.2%	11/10188	MODERATE
9a4f2824-f73b-5dda-9bf9-167743d1c000	chr15:g.59208187A>T	Single base substitution	3_prime_UTR_variant LDHAL6B None	2/986,0.2%	6/10188	MODIFIER
9a72c966-087f-580d-a33e-93d2f34de8ca	chr11:g.106011067C>A	Single base substitution	splice_region_variant MSANTD4 None	2/986,0.2%	7/10188	LOW
9a7f3f8f-ba91-59f1-8c69-f6f09c59065d	chr17:g.7674262T>C	Single base substitution	missense_variant TP53 Y234C	2/986,0.2%	20/10188	MODERATE
9aee0ac5-0171-5a16-8447-a8458e286dae	chr3:g.9750183G>A	Single base substitution	5_prime_UTR_variant OGG1 None	2/986,0.2%	3/10188	MODIFIER
9affe35a-637f-55ad-a47d-67701d329832	chr1:g.114741659C>T	Single base substitution	intron_variant CSDE1 None	2/986,0.2%	2/10188	MODIFIER
9b8eb800-8c0f-57dd-96db-82cac6db9f3a	chr1:g.158683496C>T	Single base substitution	missense_variant SPTA1 G89R	2/986,0.2%	2/10188	MODERATE
9bb0f6a8-086d-5800-b4e8-1376e1e82701	chr17:g.28675012G>T	Single base substitution	missense_variant SUPT6H D130Y	2/986,0.2%	5/10188	MODERATE
9bf102e6-70b1-5928-aa85-5997d0962e0c	chr18:g.58919530G>A	Single base substitution	missense_variant ZNF532 V415I	2/986,0.2%	4/10188	MODERATE
9bfa3c7d-e150-5041-9c10-77c4d6162a09	chr17:g.47673126G>T	Single base substitution	missense_variant KPNB1 L552F	2/986,0.2%	7/10188	MODERATE
9c0425ff-aa3a-5ef2-80dd-52aca3cc0105	chr15:g.84512453G>A	Single base substitution	upstream_gene_variant GOLGA6L5P None	2/986,0.2%	6/10188	MODIFIER
9c24e070-251e-5c42-9a16-32d99756a50e	chr12:g.119752115G>A	Single base substitution	missense_variant CIT R905C	2/986,0.2%	4/10188	MODERATE
9c720eea-148d-53e3-ab19-bbd0dff28989	chr17:g.7676041delG	Small deletion	frameshift_variant TP53 R110Vfs*13	2/986,0.2%	2/10188	HIGH
9cea4119-b491-5861-b1d9-6d5ae66da536	chr8:g.140458280C>G	Single base substitution	upstream_gene_variant TRAPPC9 None	2/986,0.2%	2/10188	MODIFIER
9d00b5d1-1ae0-591f-ba12-09a7f56ae87e	chr7:g.99195186G>A	Single base substitution	missense_variant KPNA7 S146L	2/986,0.2%	3/10188	MODERATE
9d2b1e68-9628-5537-b08a-18ad88c67fca	chr7:g.31338307C>T	Single base substitution	missense_variant NEUROD6 R321H	2/986,0.2%	3/10188	MODERATE
9d7001e0-2b02-5cce-8b6c-54fc447bb9de	chr7:g.36420268_36420269insCAGTT	Small insertion	frameshift_variant ANLN E657Afs*35	2/986,0.2%	2/10188	HIGH
9d80d952-eb2b-5f53-bb09-b6f785ae4913	chr13:g.46742124delC	Small deletion	3_prime_UTR_variant LRCH1 None	2/986,0.2%	6/10188	MODIFIER
9db7f51f-8642-5a19-b551-654d6d2e32f3	chr7:g.154962361G>A	Single base substitution	missense_variant PAXIP1 P696L	2/986,0.2%	2/10188	MODERATE
9e0e03ca-015d-5caf-bb17-9320e27a5a9b	chr14:g.31014652G>T	Single base substitution	intron_variant STRN3 None	2/986,0.2%	9/10188	MODIFIER
9e338cce-9a3f-5750-ba17-68169c29908a	chr1:g.240207052C>T	Single base substitution	missense_variant FMN2 S747F	2/986,0.2%	4/10188	MODERATE
9e79625e-7b7a-5f02-9cca-df57a537f6b0	chr11:g.124881312_124881313insC	Small insertion	3_prime_UTR_variant ROBO3 None	2/986,0.2%	4/10188	MODIFIER
9ea79a61-24c0-5fa6-91cf-64cf8a152146	chr20:g.62003255G>C	Single base substitution	synonymous_variant TAF4 A797A	2/986,0.2%	2/10188	LOW
9f208dde-fc92-5dc5-a8a1-565bedb9a6c3	chr11:g.76550329G>A	Single base substitution	3_prime_UTR_variant C11orf30 None	2/986,0.2%	2/10188	MODIFIER
9f560bf0-7142-551a-a992-275f682db8bb	chr2:g.48617848A>G	Single base substitution	5_prime_UTR_variant GTF2A1L None	2/986,0.2%	2/10188	MODIFIER
9f662c78-174d-5d87-a172-f9ab87cc4a0e	chr1:g.220631110G>A	Single base substitution	missense_variant MARK1 D329N	2/986,0.2%	2/10188	MODERATE
9fd1defa-6e42-5bad-a329-eda79192c016	chr11:g.4489597C>G	Single base substitution	missense_variant OR52K1 Q233E	2/986,0.2%	2/10188	MODERATE
a02f9f90-dfbc-5f32-9e9d-13e2753ffc94	chr13:g.102735998_102735999insCAG	Small insertion	protein_altering_variant CCDC168 I4900delinsTV	2/986,0.2%	3/10188	MODERATE
a067edc3-0632-559c-ab0c-0dd13c7dc61c	chrX:g.103825703C>T	Single base substitution	missense_variant RAB9B V28I	2/986,0.2%	3/10188	MODERATE
a107ee7b-4e54-5acb-8755-3f4a08f8decf	chr3:g.169796061T>C	Single base substitution	intron_variant LRRC34 None	2/986,0.2%	7/10188	MODIFIER
a1588dbb-dbb9-5150-9287-f18e6a5d2586	chr1:g.149480744A>G	Single base substitution	missense_variant NBPF19 Y211C	2/986,0.2%	2/10188	MODERATE
a21d4265-aab1-5e3b-b49a-beca95f41ec8	chr11:g.6456169C>T	Single base substitution	missense_variant TRIM3 R479H	2/986,0.2%	4/10188	MODERATE
a27029f2-f902-52d1-b10a-8b4bbc89e69d	chr1:g.149079092C>T	Single base substitution	synonymous_variant NBPF9 P136P	2/986,0.2%	4/10188	LOW
a2eeaa2e-99f1-5e92-a84a-74f5d815bda9	chr10:g.87960952C>G	Single base substitution	stop_gained PTEN S287*	2/986,0.2%	2/10188	HIGH
a4497370-cc01-55fc-a9cd-d3f0d3354aa1	chr6:g.54349810C>T	Single base substitution	missense_variant TINAG R332W	2/986,0.2%	3/10188	MODERATE
a4a630e4-6136-5baf-9fbc-7875e9fcefb2	chr7:g.101053126G>A	Single base substitution	missense_variant MUC17 R4415H	2/986,0.2%	2/10188	MODERATE
a4e51e85-a293-5775-a716-3bd9b9580173	chr2:g.159227952G>A	Single base substitution	missense_variant TANC1 R1346Q	2/986,0.2%	2/10188	MODERATE
a50bb554-2118-5d6a-9109-4647ec530f99	chr2:g.85544640G>A	Single base substitution	3_prime_UTR_variant MAT2A None	2/986,0.2%	4/10188	MODIFIER
a568c83c-c1ee-5725-9019-80974dde8160	chr14:g.21391015T>G	Single base substitution	missense_variant CHD8 N2372H	2/986,0.2%	3/10188	MODERATE
a5b8a5b9-5878-5bab-b040-831b4e2cde0d	chr9:g.12821545A>C	Single base substitution	missense_variant LURAP1L T158P	2/986,0.2%	2/10188	MODERATE
a5e9ef38-f48e-5327-b078-8bbcbcfcc791	chr1:g.74109457G>A	Single base substitution	synonymous_variant LRRIQ3 L268L	2/986,0.2%	2/10188	LOW
a6528c6a-aef1-5603-b4a1-78938be96c2d	chr2:g.113578749T>C	Single base substitution	non_coding_transcript_exon_variant FAM138B None	2/986,0.2%	3/10188	MODIFIER
a67b59fe-c3df-52ac-857f-040e405c974b	chr7:g.93276367_93276368insTGTAACATTTG	Small insertion	intron_variant CCDC132 None	2/986,0.2%	2/10188	MODIFIER
a8c6b8dc-efca-5e7d-ab90-88ffb2849be4	chr17:g.27610142C>T	Single base substitution	synonymous_variant KSR1 P652P	2/986,0.2%	2/10188	LOW
a922a0cd-6746-5a90-893b-6e1d205ea810	chr1:g.26779863C>T	Single base substitution	stop_gained ARID1A R1989*	2/986,0.2%	31/10188	HIGH
a9232cf4-0d0b-5a18-84a9-927f8ef77032	chr21:g.18397894C>G	Single base substitution	missense_variant TMPRSS15 R110T	2/986,0.2%	2/10188	MODERATE
a97a1531-8d2c-55f9-8c92-bb084b6e82eb	chr5:g.141980224G>A	Single base substitution	synonymous_variant RNF14 P312P	2/986,0.2%	3/10188	LOW
a999fcf5-7843-50e3-bb75-67e04b52934a	chr17:g.60017450C>G	Single base substitution	non_coding_transcript_exon_variant TBC1D3P1-DHX40P1 None	2/986,0.2%	2/10188	MODIFIER
a9ed0ef8-e74a-5fb8-9449-575114f030d1	chr2:g.71612667delC	Small deletion	frameshift_variant DYSF I1401Sfs*47	2/986,0.2%	5/10188	HIGH
a9fe1f9e-0408-5379-84ed-afe32a24c448	chr3:g.195779189C>G	Single base substitution	missense_variant MUC4 V4131L	2/986,0.2%	10/10188	MODERATE
aaf5fefb-90ef-50c5-8025-ddbcb51f01fa	chr4:g.173528750C>G	Single base substitution	missense_variant HAND2 K180N	2/986,0.2%	2/10188	MODERATE
ab47655b-a774-52d2-927b-cbba786df361	chr7:g.156658208G>A	Single base substitution	synonymous_variant RNF32 V177V	2/986,0.2%	2/10188	LOW
ab5cc002-8d42-5e41-a866-6cc02d95d144	chr8:g.109442978_109442979insGCACACAAGGAT	Small insertion	protein_altering_variant PKHD1L1 I1476delinsSTQGF	2/986,0.2%	3/10188	MODERATE
ac1b8d5a-9f89-59db-b52f-cfb873ff6af7	chr6:g.26031841C>T	Single base substitution	missense_variant HIST1H3B E74K	2/986,0.2%	7/10188	MODERATE
ac75c7ed-59f8-59c7-b8de-e04699ad24c6	chr4:g.75801193G>C	Single base substitution	missense_variant USO1 R660P	2/986,0.2%	2/10188	MODERATE
ad480a42-b902-5d0d-9c39-7effdfe611cc	chr2:g.181548237G>T	Single base substitution	intron_variant CERKL None	2/986,0.2%	2/10188	MODIFIER
adb104ac-b8c9-5f60-86ea-2ba2c0ed7c2a	chr6:g.26124172G>A	Single base substitution	5_prime_UTR_variant HIST1H2AC None	2/986,0.2%	2/10188	MODIFIER
adc3f4c7-cadc-5c8f-8202-7f3f3c510067	chr9:g.81948029G>A	Single base substitution	intron_variant RP11-383M4.6 None	2/986,0.2%	3/10188	MODIFIER
ae96179e-feb8-5373-a15c-e8a05167cce0	chr17:g.7673806C>T	Single base substitution	missense_variant TP53 V272M	2/986,0.2%	20/10188	MODERATE
aed7c657-1d2d-5099-bac9-66318445ebc1	chr1:g.235830090delT	Small deletion	intron_variant LYST None	2/986,0.2%	7/10188	MODIFIER
aefb447e-0602-54fa-9408-132249d481ec	chr3:g.49375472C>G	Single base substitution	missense_variant RHOA E40Q	2/986,0.2%	6/10188	MODERATE
afc1e324-99c8-5ffe-bad4-e067c7f64dd5	chr11:g.74977143delTG	Small deletion	3_prime_UTR_variant SPCS2 None	2/986,0.2%	2/10188	MODIFIER
afdd6a77-f01e-504d-8a32-44fed681fd55	chr9:g.83978243C>T	Single base substitution	missense_variant HNRNPK E4K	2/986,0.2%	2/10188	MODERATE
affda037-5a0c-5ba2-847e-989933c39854	chr15:g.77470972G>A	Single base substitution	synonymous_variant HMG20A Q171Q	2/986,0.2%	2/10188	LOW
b0917f14-458b-5988-a832-68483d2aa2de	chr11:g.66424673C>T	Single base substitution	missense_variant NPAS4 R595W	2/986,0.2%	3/10188	MODERATE
b094cd82-081a-5d60-8abe-17d89abaff2b	chr22:g.20690294_20690295insGGGCCT	Small insertion	non_coding_transcript_exon_variant POM121L4P None	2/986,0.2%	5/10188	MODIFIER
b157107a-72b9-552a-b3a2-aa4e563aa7f5	chrX:g.5903645C>T	Single base substitution	missense_variant NLGN4X D345N	2/986,0.2%	2/10188	MODERATE
b15aba99-5f8a-5408-986c-4df6a0f76c58	chr19:g.11453791A>C	Single base substitution	3_prime_UTR_variant ELAVL3 None	2/986,0.2%	5/10188	MODIFIER
b1ba082c-cfcc-5770-89af-e0495d2688ab	chr7:g.132785651C>G	Single base substitution	missense_variant CHCHD3 E224Q	2/986,0.2%	2/10188	MODERATE
b1d05ba1-6b84-5ce8-bb7d-b5a00673fe4b	chr7:g.117509089C>T	Single base substitution	missense_variant CFTR R74W	2/986,0.2%	2/10188	MODERATE
b1ee0f66-79af-54f0-980b-e447689abb7b	chr5:g.124744861delCTT	Small deletion	inframe_deletion ZNF608 K43del	2/986,0.2%	2/10188	MODERATE
b2840bfc-5abb-5fca-95b7-23a9fa6ecb5b	chr9:g.34833096C>T	Single base substitution	non_coding_transcript_exon_variant FAM205BP None	2/986,0.2%	2/10188	MODIFIER
b389e9ce-6d6e-5cb5-87d1-383afd689f80	chr7:g.98310578G>A	Single base substitution	synonymous_variant BAIAP2L1 Y274Y	2/986,0.2%	3/10188	LOW
b3b8d5bb-7d51-5375-ad33-5019500cf2be	chr1:g.204618558C>T	Single base substitution	missense_variant LRRN2 E479K	2/986,0.2%	3/10188	MODERATE
b3e529fd-89ff-532c-924a-e6c86f9c97ff	chr22:g.36312189C>T	Single base substitution	missense_variant MYH9 E530K	2/986,0.2%	6/10188	MODERATE
b4019533-4853-5ac2-a5ac-58193da82025	chr20:g.46504275G>C	Single base substitution	missense_variant ZNF334 F60L	2/986,0.2%	2/10188	MODERATE
b4de7d6e-74dd-5da8-8d52-df460b1b8034	chrX:g.120437302_120437303insATAT	Small insertion	intron_variant LAMP2 None	2/986,0.2%	5/10188	MODIFIER
b57b01f6-f97b-52aa-adb2-9d7c0261af0d	chr1:g.152088045C>T	Single base substitution	synonymous_variant TCHHL1 L33L	2/986,0.2%	2/10188	LOW
b57d6e5d-8b43-5628-ad81-3d4025291bc6	chr21:g.40708581G>A	Single base substitution	synonymous_variant DSCAM N78N	2/986,0.2%	5/10188	LOW
b681161f-cf0c-531f-b2e8-55f568fac416	chr16:g.68808758_68808759insC	Small insertion	frameshift_variant CDH1 V202Cfs*7	2/986,0.2%	2/10188	HIGH
b6898724-d446-5b62-b504-b0c8119d8366	chr15:g.82523985T>C	Single base substitution	non_coding_transcript_exon_variant GOLGA6L17P None	2/986,0.2%	11/10188	MODIFIER
b6bb3277-ec2a-507b-a6a2-328beb97c0fa	chr3:g.97942778A>C	Single base substitution	3_prime_UTR_variant MINA None	2/986,0.2%	2/10188	MODIFIER
b7070f30-12a9-59ae-aef9-041573dde0ea	chr17:g.74372142G>A	Single base substitution	missense_variant GPR142 E311K	2/986,0.2%	2/10188	MODERATE
b744e051-c191-5e76-9b14-0e316c7c478b	chr6:g.26123691C>G	Single base substitution	missense_variant HIST1H2BC E72Q	2/986,0.2%	2/10188	MODERATE
b7883d6d-042b-5507-82d3-4659d459ff5f	chr20:g.33290992C>T	Single base substitution	missense_variant BPIFB1 T134M	2/986,0.2%	2/10188	MODERATE
b8159484-19ce-58f9-b141-713d9d9ad059	chr12:g.56315142G>C	Single base substitution	missense_variant CNPY2 L26V	2/986,0.2%	2/10188	MODERATE
b871b85a-6ca7-56da-86cf-21068b651668	chr7:g.152248516C>A	Single base substitution	stop_gained KMT2C E640*	2/986,0.2%	2/10188	HIGH
b888f6ce-0da5-5ee3-8167-ed8779b4bc1d	chr17:g.7688640C>T	Single base substitution	5_prime_UTR_variant WRAP53 None	2/986,0.2%	2/10188	MODIFIER
b8908ac1-ffb1-51bd-bceb-34a105dd3118	chr6:g.116253681C>T	Single base substitution	missense_variant TSPYL4 D110N	2/986,0.2%	2/10188	MODERATE
b89ff6d4-10a5-59d1-9e02-58c12d456032	chr12:g.52550085C>T	Single base substitution	synonymous_variant KRT71 V200V	2/986,0.2%	2/10188	LOW
b8e8b137-4191-50f3-b09e-3cfdd5e6319c	chr5:g.56864852_56864853insA	Small insertion	frameshift_variant MAP3K1 L319Tfs*7	2/986,0.2%	2/10188	HIGH
b8efbdf7-4789-5524-8048-ba78ca607000	chr15:g.41823800G>A	Single base substitution	missense_variant MAPKBP1 E1324K	2/986,0.2%	2/10188	MODERATE
b905b7f0-679b-587b-b4dd-4454aa8a8280	chr1:g.148107094G>T	Single base substitution	missense_variant NBPF11 A700D	2/986,0.2%	3/10188	MODERATE
b9d072e7-d959-57c6-95bc-d37ae68ba9ee	chr6:g.29355545G>C	Single base substitution	synonymous_variant OR5V1 S217S	2/986,0.2%	2/10188	LOW
ba3d6127-a4a1-551e-ac36-dfc0ca832c63	chr17:g.7676037A>G	Single base substitution	missense_variant TP53 L111P	2/986,0.2%	3/10188	MODERATE
ba584d6f-966b-5a7f-8992-ab1c4a253946	chr1:g.200554579C>T	Single base substitution	missense_variant KIF14 E1486K	2/986,0.2%	2/10188	MODERATE
baa511f2-b0e1-5cdb-891e-b788fb6c9a25	chr1:g.146989690G>A	Single base substitution	missense_variant NBPF12 R1172K	2/986,0.2%	2/10188	MODERATE
bac8495d-025d-576d-9ae7-2357c0336e25	chr9:g.128494581G>A	Single base substitution	synonymous_variant ODF2 A608A	2/986,0.2%	2/10188	LOW
bb3464b2-ceff-5ae2-bf53-a5f3d55c3663	chr14:g.49852757G>A	Single base substitution	5_prime_UTR_variant NEMF None	2/986,0.2%	3/10188	MODIFIER
bbd4eaa2-9719-54f8-bf51-1c2792708763	chr5:g.149376947G>A	Single base substitution	missense_variant IL17B R34W	2/986,0.2%	2/10188	MODERATE
bc239083-8e36-553a-b4b6-54b735ec2b75	chr17:g.7674872T>G	Single base substitution	missense_variant TP53 Y220S	2/986,0.2%	4/10188	MODERATE
bdcc24f9-609c-5781-854d-7a7b24c65333	chr11:g.1097436C>G	Single base substitution	non_coding_transcript_exon_variant MUC2 None	2/986,0.2%	3/10188	MODIFIER
be7799da-46ed-573b-9b7f-e5e025aa1acb	chr15:g.83572663C>T	Single base substitution	stop_gained SH3GL3 Q144*	2/986,0.2%	2/10188	HIGH
be7cff65-5339-508e-bf8a-5112d6e0c956	chr6:g.39114943C>T	Single base substitution	synonymous_variant SAYSD1 K49K	2/986,0.2%	2/10188	LOW
bf390606-51a6-5043-a887-ff438dd42d2d	chr5:g.43294789G>C	Single base substitution	synonymous_variant HMGCS1 L326L	2/986,0.2%	2/10188	LOW
bf5a22ad-d5bb-5ac1-93d6-a8e28282f06f	chr8:g.139618891G>C	Single base substitution	missense_variant KCNK9 F164L	2/986,0.2%	2/10188	MODERATE
c00f3ee7-6fa2-5a40-9e92-61d63ec24804	chrX:g.26161732G>A	Single base substitution	non_coding_transcript_exon_variant MAGEB6P1 None	2/986,0.2%	2/10188	MODIFIER
c07128ba-00d6-5adc-8b9a-7de55b321ee6	chr4:g.112649598delA	Small deletion	frameshift_variant LARP7 T405Qfs*5	2/986,0.2%	16/10188	HIGH
c144eab9-548a-512f-a8cc-e86140b2ee4b	chr5:g.131461940G>A	Single base substitution	missense_variant RAPGEF6 R877C	2/986,0.2%	2/10188	MODERATE
c14508bd-315b-546d-86f1-1fe00f4a1c23	chrX:g.151924469C>T	Single base substitution	missense_variant MAGEA4 R269C	2/986,0.2%	2/10188	MODERATE
c16a5088-0eeb-583d-935c-6c18e4cdbeff	chr5:g.21751618G>T	Single base substitution	3_prime_UTR_variant CDH12 None	2/986,0.2%	2/10188	MODIFIER
c1a77b63-18b3-5f1a-8ea1-296041257b9b	chr8:g.21693172delT	Small deletion	3_prime_UTR_variant GFRA2 None	2/986,0.2%	28/10188	MODIFIER
c1b6fd8a-8c32-5560-854a-541e2c4d100b	chr12:g.30982601G>A	Single base substitution	missense_variant TSPAN11 E176K	2/986,0.2%	2/10188	MODERATE
c1c36c67-61c2-5637-9ab1-5a58185dc02c	chr11:g.6002356_6002357insCACCTTT	Small insertion	frameshift_variant OR56A4 D265Kfs*20	2/986,0.2%	3/10188	HIGH
c1dbd26d-0b38-5c10-b0e9-c73f6c13e6b4	chr3:g.196937345delA	Small deletion	intron_variant NCBP2 None	2/986,0.2%	6/10188	MODIFIER
c1eb5194-a3f4-53e3-9f57-bb13100a9fba	chr5:g.143820485C>T	Single base substitution	synonymous_variant HMHB1 L15L	2/986,0.2%	2/10188	LOW
c1f0af03-0ef4-50ea-a9cb-2b460b44cdbd	chr4:g.72548836_72548837insGTATGTT	Small insertion	frameshift_variant ADAMTS3 S49Kfs*32	2/986,0.2%	5/10188	HIGH
c1fedd20-50bf-5804-819f-57c5a4339578	chr3:g.130398050C>T	Single base substitution	synonymous_variant COL6A5 D1310D	2/986,0.2%	3/10188	LOW
c2686bb7-0859-5b44-9714-b3ce4137e1c6	chr7:g.44059554G>A	Single base substitution	missense_variant DBNL E315K	2/986,0.2%	2/10188	MODERATE
c2834517-9e2f-5560-a4e0-dde2e1fe534b	chr16:g.84170100G>A	Single base substitution	synonymous_variant DNAAF1 S424S	2/986,0.2%	4/10188	LOW
c2cf6459-240b-5128-88a6-bc2a1e3290af	chr1:g.24057606C>T	Single base substitution	missense_variant MYOM3 V1358I	2/986,0.2%	4/10188	MODERATE
c479301f-d76a-5d14-b30e-efbe9d893bc8	chr8:g.85657567G>T	Single base substitution	non_coding_transcript_exon_variant REXO1L1P None	2/986,0.2%	3/10188	MODIFIER
c4a1d602-2d03-5803-a4e5-9d69d331177a	chr21:g.17793548_17793549insTCCCAGAATTA	Small insertion	frameshift_variant C21orf91 E254Vfs*24	2/986,0.2%	3/10188	HIGH
c4e6fe3d-f02c-5a18-ab9c-dca3bf4f1f10	chr1:g.227101218G>T	Single base substitution	missense_variant CDC42BPA P675T	2/986,0.2%	7/10188	MODERATE
c4fb0a0a-849e-50bc-91c9-c5c70afd94c9	chr12:g.64420423G>C	Single base substitution	missense_variant XPOT E249Q	2/986,0.2%	2/10188	MODERATE
c55bce29-41ba-5709-aed2-27c71e89b233	chr19:g.52704413G>C	Single base substitution	3_prime_UTR_variant ZNF611 None	2/986,0.2%	2/10188	MODIFIER
c574b762-b812-5df8-8422-003e6832b653	chr5:g.100380135G>A	Single base substitution	non_coding_transcript_exon_variant RP11-346J10.2 None	2/986,0.2%	10/10188	MODIFIER
c5d6427d-e830-5dc1-a68e-e527d94f26fb	chr19:g.32862182C>T	Single base substitution	missense_variant SLC7A9 A214T	2/986,0.2%	2/10188	MODERATE
c5ea2ae2-825d-57c8-8dad-3c290691ca0e	chr12:g.119714310C>T	Single base substitution	missense_variant CIT R1356H	2/986,0.2%	3/10188	MODERATE
c5eaa5af-ff58-5b1d-a4b9-89fbc141e19c	chr10:g.102011755G>T	Single base substitution	missense_variant C10orf76 Q267K	2/986,0.2%	9/10188	MODERATE
c63a8bed-d9c8-5b3d-80af-ae27dc5c5561	chr6:g.26107930_26107931insGATTATGATTTATTAGATTGC	Small insertion	protein_altering_variant HIST1H1T S55delinsCNLINHNP	2/986,0.2%	2/10188	MODERATE
c6634973-faed-527f-b62f-c6d31aec4d6d	chr11:g.14279028G>A	Single base substitution	3_prime_UTR_variant RRAS2 None	2/986,0.2%	2/10188	MODIFIER
c695ca17-8ebc-550b-bbca-017255bfd8a3	chr12:g.85836427_85836428insCCC	Small insertion	5_prime_UTR_variant RASSF9 None	2/986,0.2%	4/10188	MODIFIER
c77a4520-a715-592e-886a-d8d68941f352	chr17:g.7675216C>G	Single base substitution	missense_variant TP53 K132N	2/986,0.2%	13/10188	MODERATE
c787c86f-6a40-510e-9c7a-c4f98cb1d72e	chr10:g.8073978_8073979insT	Small insertion	frameshift_variant GATA3 G431Wfs*76	2/986,0.2%	2/10188	HIGH
c7abec89-da1f-5d5b-83bb-835d02392b50	chr12:g.8650521G>A	Single base substitution	missense_variant MFAP5 H106Y	2/986,0.2%	2/10188	MODERATE
c7ba433b-75f6-57d6-890e-a5e2c7bd28ec	chr9:g.104618120_104618121insA	Small insertion	frameshift_variant OR13C9 V29Cfs*93	2/986,0.2%	2/10188	HIGH
c7f23dd6-8f0b-5a8a-b245-fb7184fc61b6	chr6:g.108680604T>C	Single base substitution	3_prime_UTR_variant FOXO3 None	2/986,0.2%	4/10188	MODIFIER
c816e0f8-329d-5de1-bff9-773189a1dd35	chr5:g.100389530A>C	Single base substitution	non_coding_transcript_exon_variant RP11-346J10.3 None	2/986,0.2%	9/10188	MODIFIER
c835eee7-2f11-5f93-accb-ca4e9dfb81a5	chr13:g.30461097C>G	Single base substitution	3_prime_UTR_variant HMGB1 None	2/986,0.2%	24/10188	MODIFIER
c83d607c-7998-58f7-a0b6-87572794ca20	chr11:g.1097440C>G	Single base substitution	non_coding_transcript_exon_variant MUC2 None	2/986,0.2%	4/10188	MODIFIER
c858e699-f540-5ab9-8ae8-2498046517af	chr19:g.41316757C>A	Single base substitution	synonymous_variant CCDC97 A140A	2/986,0.2%	2/10188	LOW
c8aa213a-9e5c-59c3-9f40-edaf5766d283	chr7:g.141929805delA	Small deletion	3_prime_UTR_variant CLEC5A None	2/986,0.2%	3/10188	MODIFIER
c8e91d66-4c4d-5f6d-b6b3-9641c8dd9147	chr3:g.179234286G>A	Single base substitution	missense_variant PIK3CA M1043I	2/986,0.2%	9/10188	MODERATE
c8ed3757-4d38-50d0-b7b4-0b48b8a7e09e	chr1:g.158078116C>T	Single base substitution	missense_variant KIRREL R110W	2/986,0.2%	4/10188	MODERATE
c92d83f1-8bf8-581b-917f-4e94577823e8	chr15:g.72666062C>A	Single base substitution	missense_variant GOLGA6B P630T	2/986,0.2%	2/10188	MODERATE
c94ce676-74f9-5a4f-9ae2-bfa243b7f3eb	chrX:g.118649021C>T	Single base substitution	missense_variant DOCK11 S1492L	2/986,0.2%	2/10188	MODERATE
[truncated: 4,170 more rows]

## Sheet: COAD
84aef48f-31e6-52e4-8e05-7d5b9ab15087	chr7:g.140753336A>T	Single base substitution	missense_variant BRAF V600E	49/399,12.28%	565/10188	MODERATE
[truncated: 6,999 more rows]

[truncated: 9 more sheets: GBM, KIRC, LGG, LUSC, OV, PRAD, SKCM, THCA, UCEC]
